# Supplementary material for: Modulating chitin synthesis in marine algae with iminosugars obtained by SmI2 and FeCl3-mediated diastereoselective carbonyl ene reaction
Source: Royal Society of Chemistry journal article supplement (doi:10.1039/d2ob00907b), 2022-01-01
Supplement: d2ob00907b1.pdf [file d2ob00907b1.pdf]

## Supporting Information

### **Modulating chitin synthesis in marine algae with iminosugars obtained by SmI<sub>2</sub> and FeCl<sub>3</sub>-mediated diastereoselective carbonyl ene reaction**

Marcel Holzwarth,<sup>a,¶</sup> Jan Ludwig,<sup>b,¶</sup> Alexander Bernz,<sup>a</sup> Birgit Claasen,<sup>a</sup> Asma Majoul,<sup>b</sup> Julia Reuter,<sup>b</sup> Anna Zens,<sup>a</sup> Brigitte Pawletta<sup>c</sup>, Ursula Bilitewski<sup>c</sup>, Ingrid M. Weiss<sup>\*b,d,e</sup> and Sabine Laschat<sup>\*a</sup>

<sup>¶</sup> both coauthors contributed equally to this work.

## Table of contents

|    |                                                               |     |
|----|---------------------------------------------------------------|-----|
| 1) | General information                                           | S3  |
| 2) | Synthetic procedures                                          | S4  |
| 3) | Functionalizations of hydroxypiperidines                      | S65 |
| 4) | Stereochemical elucidation of the cyclic hydroxypiperidines   | S69 |
| 5) | Chitin fiber synthesis assay with <i>Thalassiosira rotula</i> | S76 |
| 6) | Literature                                                    | S78 |
| 7) | NMR-spectra                                                   | S79 |

## 1) General information

Moisture sensitive reactions were performed under nitrogen atmosphere using flame-dried glassware and standard Schlenk techniques. NMR-spectra were recorded on a Bruker Avance 300, Avance 400, Avance 500 or Avance 700. NMR-spectra data were reported as  $\delta$  values in ppm relative to the NMR-solvent residue signals. Used solvents were specified for each compound. New compounds were fully characterized using 2D-NMR techniques for signal assignment.  $^1\text{H}$ -NMR coupling constants ( $J$ ) were reported in Hertz (Hz) and indicated with the following short tags for multiplicity: s (singlet); d (doublet); t (triplet); q (quartet); m (multiplet) and br (broad). Mass spectra were recorded on a Finnigan MAT MAT95 spectrometer (EI-conditions at 70 eV) or a Bruker Daltonics micro-TOF-Q spectrometer (ESI-conditions). IR spectra were recorded on a Bruker Alpha Platinum ATR with MKII Golden Gate Single Reflection Diamant ATR-system. HPLC was performed using a Shimadzu system containing LC-20AT pumps, a CBM-20A prominence communications bus module and a SPD-20A UV/Vis-detector. Separation was accomplished via achiral Orbit- or chiral Chiracel<sup>®</sup>-OD-column. Column chromatography was performed using Fluka silica (Type 60, diameter 40 – 70  $\mu\text{m}$ ). Solvents were distilled prior to use. Unless stated otherwise, all chemicals were used as received from the suppliers. Reaction progress was tracked using Macherey-Nagel TLC plates type 60 F 254 with fluorescence indicator. For non-UV-active compounds staining solutions were used and the plates were slightly heated.

### Staining solutions for TLC:

**Anisaldehyde-solution:** 0.5 mL 4-methoxybenzaldehyde, 50 mL glacial acetic acid, 1.0 mL concentrated sulfuric acid, 300 mL ethanol.

**Ninhydrin-solution:** 0.3 g ninhydrin in 95 mL acetone.

## 2) Synthetic procedures

### GP1: Synthesis of amino acid methyl ester hydrochlorides from their respective D- or L-amino acid

The hydrochlorides were prepared according to the literature.<sup>[1]</sup> Thionyl chloride (8.7 mL, 14.3 g, 120 mmol) was added dropwise to a solution of the amino acid (40.0 mmol) in methanol (40 mL) at 0 °C. After stirring for 48 h at room temperature the solvent was evaporated. The products were isolated as colorless solids and used in further reactions without additional purifications.

#### Methyl L-valinate hydrochloride (25a)

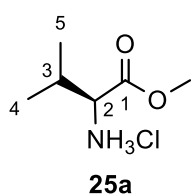

According to GP1 **25a** was prepared from L-valine **24a** (1.76 g, 15.0 mmol) and thionyl chloride (3.3 mL, 5.35 g, 45.0 mmol) as a colorless solid (2.52 g, 15.0 mmol, quant.).  $[\alpha]_D^{20} + 7$  (*c* 1.0 in H<sub>2</sub>O). <sup>1</sup>H-NMR (400 MHz, DMSO-d<sub>6</sub>)  $\delta$  0.94 (d, *J* = 6.9 Hz, 3H, 4-H/5-H), 0.99 (d, *J* = 6.9 Hz, 3H, 5-H/4-H), 2.13 – 2.29 (m, 1H, 3-H), 3.70 – 3.78 (m, 3H, OMe), 3.78 – 3.85 (m, 1H, 2-H), 8.42 – 9.00 (m, 3H, NH<sub>3</sub>). <sup>13</sup>C-NMR (101 MHz, DMSO-d<sub>6</sub>)  $\delta$  17.5 (C-4/C-5), 18.4 (C-5/C-4), 29.3 (C-3), 52.5 (OMe), 57.2 (C-2), 169.2 (C-1). The spectral data are in accordance with previous reported literature.<sup>[2]</sup>

#### Methyl D-valinate hydrochloride (25b)

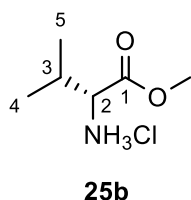

According to GP1 **25b** was prepared from D-valine **24b** (4.67 g, 40.0 mmol) and thionyl chloride (8.7 mL, 14.3 g, 120 mmol) as a colorless solid (6.60 g, 39.4 mmol, 98 %).  $[\alpha]_D^{20} - 17$  (*c* 1.0 in H<sub>2</sub>O). <sup>1</sup>H-NMR (400 MHz, DMSO-d<sub>6</sub>)  $\delta$  0.94 (d, *J* = 7.0 Hz, 3H, 4-H/5-H), 0.99 (d, *J* = 7.0 Hz, 3H, 5-H/4-H), 2.13 – 2.28 (m, 1H, 3-H), 3.74 (s, 3H, OMe), 3.78 – 3.87 (m, 1H, 2-H), 8.30 – 9.10 (m, 3H, NH<sub>3</sub>). <sup>13</sup>C-NMR (101 MHz, DMSO-d<sub>6</sub>)  $\delta$  17.5 (C-4/C-5), 18.5 (C-5/C-4), 29.3 (C-3), 52.5 (OMe), 57.3 (C-2), 169.1 (C-1). The spectral data are in accordance with previous reported literature.<sup>[2]</sup>

#### Methyl L-leucine hydrochloride (25c)

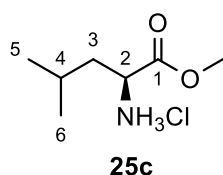

According to GP1 **25c** was prepared from L-leucine **24c** (2.62 g, 20.0 mmol) and thionyl chloride (4.4 mL, 7.14 g, 60.0 mmol) as a colorless solid (3.59 g, 19.8 mmol, 99 %).  $[\alpha]_D^{20} + 18$  (*c* 1.0 in H<sub>2</sub>O). <sup>1</sup>H-NMR (400 MHz, D<sub>2</sub>O)  $\delta$  0.90 – 1.10 (m, 6H, 5-H, 6-H), 1.70 – 1.86 (m, 2H, 3-H<sub>a</sub>, 4-H), 1.86 – 1.99 (m, 1H, 3-H<sub>b</sub>), 3.86 – 3.93 (m, 3H, OMe), 4.15 – 4.25 (m, 1H, 2-H). <sup>13</sup>C-NMR (101 MHz, D<sub>2</sub>O)  $\delta$  21.0 (C-5/C-6), 21.5 (C-6/C-5), 23.9 (C-4), 38.8 (C-3), 51.5 (C-

2), 53.5 (OMe), 171.3 (C-1). The spectral data are in accordance with previous reported literature.<sup>[3]</sup>

#### Methyl D-leucine hydrochloride (25d)

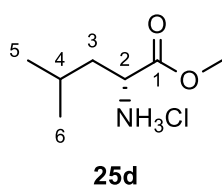

According to GP1 **25d** was prepared from D-leucine **24d** (5.25 g, 40.0 mmol) and thionyl chloride (8.7 mL, 14.3 g, 120.0 mmol) as a colorless solid (6.80 g, 37.4 mmol, 94 %).  $[\alpha]_D^{20} - 7$  (*c* 1.0 in H<sub>2</sub>O). <sup>1</sup>H-NMR (500 MHz, D<sub>2</sub>O)  $\delta$  0.91 – 1.02 (m, 6H, 5-H, 6-H), 1.70 – 1.82 (m, 2H, 3-H<sub>a</sub>, 4-H), 1.83 – 1.93 (m, 1H, 3-H<sub>b</sub>), 3.86 (s, 3H, OMe), 4.12 – 4.22 (m, 1H, 2-H). <sup>13</sup>C-NMR (126 MHz, D<sub>2</sub>O)  $\delta$  21.0 (C-5/C-6), 21.5 (C-6/C-5), 23.9 (C-4), 38.8 (C-3), 51.4 (C-2), 53.5 (OMe), 171.3 (C-1). The spectral data are in accordance with previous reported literature.<sup>[3]</sup>

#### Methyl L-isoleucinate hydrochloride (25e)

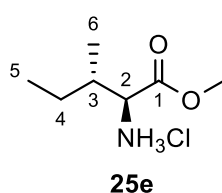

According to GP1 **25e** was prepared from L-isoleucine **24e** (5.25 g, 40.0 mmol) and thionyl chloride (8.7 mL, 14.3 g, 120 mmol) as a colorless solid (7.19 g, 39.6 mmol, 99 %).  $[\alpha]_D^{20} + 15$  (*c* 0.6 in CHCl<sub>3</sub>). <sup>1</sup>H-NMR (400 MHz, D<sub>2</sub>O)  $\delta$  0.98 (t, *J* = 7.4 Hz, 3H, 5-H), 1.05 (d, *J* = 7.1 Hz, 3H, 6-H), 1.30 – 1.46 (m, 1H, 4-H<sub>a</sub>), 1.46 – 1.60 (m, 1H, 4-H<sub>b</sub>), 2.02 – 2.20 (m, 1H, 3-H), 3.89 (s, 3H, OMe), 4.10 – 4.24 (m, 1H, 2-H). <sup>13</sup>C-NMR (101 MHz, D<sub>2</sub>O)  $\delta$  10.8 (C-5), 14.1 (C-6), 24.8 (C-4), 36.0 (C-3), 53.3 (OMe), 57.3 (C-2), 170.3 (C-1). The spectral data are in accordance with previous reported literature.<sup>[4]</sup>

#### Methyl L-phenylalaninate hydrochloride (25f)

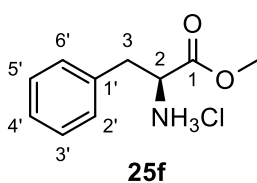

According to GP1 **25f** was prepared from L-phenylalanine **24f** (6.60 g, 40.0 mmol) and thionyl chloride (8.7 mL, 14.3 g, 120 mmol) as a colorless solid (8.31 g, 38.5 mmol, 96 %).  $[\alpha]_D^{20} + 13$  (*c* 4.6 in CHCl<sub>3</sub>). <sup>1</sup>H-NMR (400 MHz, DMSO-d<sub>6</sub>)  $\delta$  3.11 (dd, *J* = 13.9 Hz, 7.6 Hz, 1H, 3-H<sub>a</sub>), 3.25 (dd, *J* = 13.9 Hz, 5.4 Hz, 1H, 3-H<sub>b</sub>), 3.63 (s, 3H, OMe), 4.12 – 4.28 (m, 1H, 2-H), 7.18 – 7.40 (m, 5H, 2'-H, 3'-H, 4'-H, 5'-H, 6'-H), 8.87 (s, 3H, NH<sub>3</sub>). <sup>13</sup>C-NMR (101 MHz, DMSO-d<sub>6</sub>)  $\delta$  35.8 (C-3), 52.4 (OMe), 53.3 (C-2), 127.2 (C-4'), 128.5 (C-2', C-6'), 129.4 (C-3', C-5'), 134.8 (C-1'), 169.3 (C-1). The spectral data are in accordance with previous reported literature.<sup>[5]</sup>

### Methyl D-phenylalaninate hydrochloride (25g)

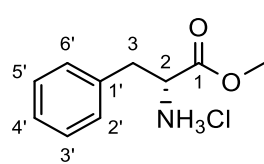

**25g**

According to GP1 **25g** was prepared from D-phenylalanine **24g** (6.61 g, 40.0 mmol) and thionyl chloride (8.7 mL, 14.3 g, 120 mmol) as a colorless solid (8.47 g, 39.3 mmol, 98 %).  $[\alpha]_D^{20} + 64$  (*c* 1.0 in H<sub>2</sub>O). <sup>1</sup>H-NMR (500 MHz, DMSO-*d*<sub>6</sub>)  $\delta$  3.09 (dd, *J* = 14.0 Hz, 7.4 Hz, 1H, 3-H<sub>a</sub>), 3.18 (dd, *J* = 14.0 Hz, 5.4 Hz, 1H, 3-H<sub>b</sub>), 3.66 (s, 3H, OMe), 4.21 – 4.30 (m, 1H, 2-H), 7.21 – 7.37 (m, 5H, 2'-H, 3'-H, 4'-H, 5'-H, 6'-H), 8.64 (s, 3H, NH<sub>3</sub>). <sup>13</sup>C-NMR (126 MHz, DMSO-*d*<sub>6</sub>)  $\delta$  35.9 (C-3), 52.6 (OMe), 53.2 (C-2), 127.3 (C-4'), 128.6 (C-2', C-6'), 129.4 (C-3', C-5'), 134.6 (C-1'), 169.4 (C-1). The spectral data are in accordance with previous reported literature.<sup>[5]</sup>

### GP2: *N*-Protection of amino group using *o*-nitrobenzenesulfonyl chloride

The *N*-protected amino acid methyl esters were prepared according to the literature.<sup>[6]</sup> A round bottom flask was charged with a solution of the amino acid methyl ester hydrochloride (10.0 mmol) in dichloromethane (20 mL) under nitrogen atmosphere. Upon cooling to 0 °C solutions of triethylamine (3.5 mL, 25.0 mmol, 2.5 M in dichloromethane) and *o*-nitrobenzenesulfonyl chloride (2.88 g, 13.0 mmol, 2.6 M in dichloromethane) were added dropwise. After stirring for 20 h at room temperature the organic phase was washed with water (3 × 20 mL) and dried over magnesium sulfate. The solvents were evaporated and the crude product was purified using column chromatography. The products were isolated as oils or solids.

### Methyl-((2-nitrophenyl)sulfonyl)-L-valinate (26a)

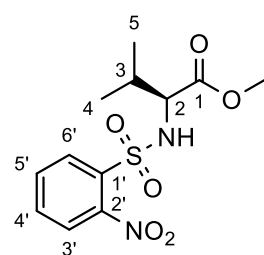

**26a**

According to GP2 **26a** was prepared from methyl L-valinate hydrochloride **25a** (1.68 g, 10.0 mmol), *o*-nitrobenzenesulfonyl chloride (2.88 g, 13.0 mmol) and triethylamine (3.5 mL, 25.3 g, 25.0 mmol) as a yellow oil (2.88 g, 9.11 mmol, 91 %). Purification was accomplished via column chromatography on SiO<sub>2</sub> with hexanes/EtOAc (5 : 1 → 3 : 1).  $[\alpha]_D^{20} - 194$  (*c* 1.0 in CHCl<sub>3</sub>). *R*<sub>f</sub> = 0.34 (hexanes/EtOAc, 7 : 3, UV). FT-IR (ATR):  $\tilde{\nu}$  = 3314 (w, br), 3098 (w), 2967 (w), 1739 (vs), 1594 (w), 1541 (vs), 1442 (m), 1427 (m), 1392 (w), 1357 (vs), 1301 (m), 1265 (m), 1209 (m), 1173 (vs), 1141 (s), 1126 (m), 1062 (w), 1017 (w), 996 (w), 965 (w), 917 (w), 879 (w), 854 (m), 784 (m), 760 (w), 742 (m), 701 (w), 655 (m), 598 (s), 567 (m) cm<sup>-1</sup>. <sup>1</sup>H-NMR (500 MHz, CDCl<sub>3</sub>)  $\delta$  0.94 (d, *J* = 6.8 Hz, 3H, 4-H/5-H), 1.01 (d, *J* = 6.8 Hz, 3H, 5-H/4-H), 2.16 (dq, *J* = 6.8 Hz, 6.8 Hz, 5.2 Hz, 1H, 3-H), 3.44 (s, 3H, OMe), 4.02 (dd, *J* = 9.7 Hz, 5.2 Hz, 1H, 2-H), 6.03 (d, *J* = 9.7 Hz, 1H,

NH), 7.69 – 7.76 (m, 2H, 4'-H, 5'-H), 7.90 – 7.96 (m, 1H, 3'-H), 8.03 – 8.09 (m, 1H, 6'-H). <sup>13</sup>C-NMR (126 MHz, CDCl<sub>3</sub>) δ 17.5 (C-4/C-5), 19.0 (C-5/C-4), 31.6 (C-3), 52.2 (OMe), 62.2 (C-2), 125.6 (C-3'), 130.4 (C-6'), 132.8 (C-5'), 133.6 (C-4'), 134.2 (C-1'), 147.7 (C-2'), 171.1 (C-1). HRMS (ESI): calc (found) for C<sub>12</sub>H<sub>16</sub>N<sub>2</sub>O<sub>6</sub>S ([M+Na]<sup>+</sup>): 339.0621 (339.0630). The spectral data are in accordance with previous reported literature.<sup>[6]</sup>

### Methyl-((2-nitrophenyl)sulfonyl)-D-valinate (**26b**)

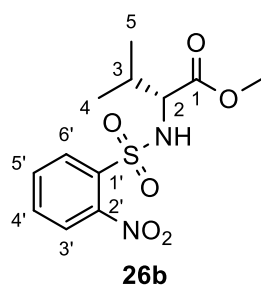

According to GP2 **26b** was prepared from methyl D-valinate hydrochloride **25b** (1.68 g, 10.0 mmol), *o*-nitrobenzylsulfonyl chloride (2.88 g, 13.0 mmol) and triethylamine (3.5 mL, 2.53 g, 25.0 mmol) as a yellow oil (2.85 g, 9.00 mmol, 90 %). Purification was accomplished via column chromatography on SiO<sub>2</sub> with hexanes/EtOAc (5 : 1 → 3 : 1).  $[\alpha]_D^{20} + 205$  (c 1.0 in CHCl<sub>3</sub>).  $R_f = 0.21$  (hexanes/EtOAc, 3 : 1, UV). FT-IR (ATR):  $\tilde{\nu} = 3321$  (w, br), 3099 (w), 2966 (w), 1737 (vs), 1594 (w), 1539 (vs), 1441 (s), 1425 (s), 1392 (w), 1354 (vs), 1300 (s), 1263 (s), 1208 (s), 1169 (vs), 1139 (s), 1125 (s), 1060 (m), 1016 (m), 996 (m), 964 (w), 914 (m), 878 (m), 854 (s), 783 (s), 759 (m), 731 (vs), 701 (m), 654 (s), 592 (vs), 563 (vs), 468 (w) cm<sup>-1</sup>. <sup>1</sup>H-NMR (500 MHz, CDCl<sub>3</sub>) δ 0.92 (d,  $J = 7.0$  Hz, 3H, 4-H/5-H), 1.01 (d,  $J = 7.0$  Hz, 3H, 5-H/4-H), 2.10 – 2.23 (m, 1H, 3-H), 3.44 (s, 3H, OMe), 4.01 (dd,  $J = 9.8$  Hz, 5.3 Hz, 1H, 2-H), 6.04 (d,  $J = 9.8$  Hz, 1H, NH), 7.69 – 7.77 (m, 2H, 4'-H, 5'-H), 7.90 – 7.97 (m, 1H, 3'-H), 8.03 – 8.09 (m, 1H, 6'-H). <sup>13</sup>C-NMR (126 MHz, CDCl<sub>3</sub>) δ 17.5 (C-4/C-5), 19.0 (C-5/C-4), 31.6 (C-3), 52.2 (O-Me), 62.2 (C-2), 125.6 (C-3'), 130.4 (C-6'), 132.8 (C-5'), 133.6 (C-4'), 134.1 (C-1'), 147.7 (C-2'), 171.1 (C-1). HRMS (ESI): calc (found) for C<sub>12</sub>H<sub>16</sub>N<sub>2</sub>O<sub>6</sub>S ([M+Na]<sup>+</sup>): 339.0621 (339.0622). The spectral data are in accordance with previous reported literature.<sup>[7]</sup>

### Methyl-((2-nitrophenyl)sulfonyl)-L-leucinate (**26c**)

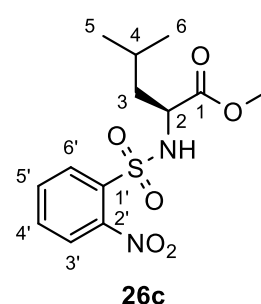

According to GP2 **26c** was prepared from methyl L-leucine hydrochloride **25c** (2.73 g, 15.0 mmol), *o*-nitrobenzylsulfonyl chloride (4.32 g, 19.5 mmol) and triethylamine (5.2 mL, 3.80 g, 37.5 mmol) as a yellow oil (4.92 g, 14.9 mmol, 99 %). Purification was accomplished via column chromatography on SiO<sub>2</sub> with hexanes/EtOAc (3 : 1).  $[\alpha]_D^{20} - 183$  (c 1.0 in CHCl<sub>3</sub>).  $R_f = 0.64$  (hexanes/EtOAc, 1 : 1, UV). FT-IR (ATR):  $\tilde{\nu} = 3318$  (w, br), 3100 (w), 2959 (m), 2873 (w), 1743 (s), 1594 (w), 1542 (vs), 1442 (m), 1423 (m), 1357 (vs), 1305 (m), 1275 (m), 1234 (m), 1205 (m), 1173 (vs), 1148 (s), 1126 (m), 1090 (w), 1060 (w), 1021 (w), 980 (w), 900 (w), 854 (w), 821 (w), 785 (w), 742 (m), 701

(w), 655 (m), 597 (m), 575 (m)  $\text{cm}^{-1}$ .  $^1\text{H}$ -NMR (500 MHz,  $\text{CDCl}_3$ )  $\delta$  0.95 (d,  $J = 6.6$  Hz, 6H, 5-H, 6-H), 1.57 – 1.64 (m, 2H, 3-H), 1.79 – 1.91 (m, 1H, 4-H), 3.42 (s, 3H, OMe), 4.18 – 4.27 (m, 1H, 2-H), 5.95 (d,  $J = 9.9$  Hz, 1H, NH), 7.70 – 7.76 (m, 2H, 4'-H, 5'-H), 7.92 – 7.96 (m, 1H, 3'-H), 8.05 – 8.09 (m, 1H, 6'-H).  $^{13}\text{C}$ -NMR (126 MHz,  $\text{CDCl}_3$ )  $\delta$  21.3 (C-5/C-6), 22.7 (C-6/C-5), 24.3 (C-4), 42.0 (C-3), 52.2 (OMe), 55.4 (C-2), 125.6 (C-3'), 130.4 (C-6'), 132.9 (C-5'), 133.6 (C-4'), 134.1 (C-1'), 147.6 (C-2'), 172.0 (C-1). HRMS (ESI): calc (found) for  $\text{C}_{13}\text{H}_{18}\text{N}_2\text{O}_6\text{S}$  ( $[\text{M}+\text{Na}]^+$ ): 353.0778 (353.0788). The spectral data are in accordance with previous reported literature.<sup>[8]</sup>

### Methyl-((2-nitrophenyl)sulfonyl)-D-leucinate (26d)

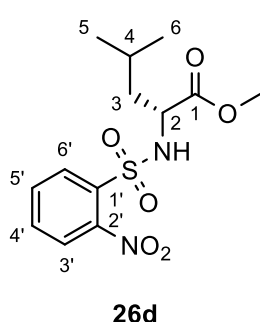

According to GP2 **26d** was prepared from methyl D-leucine hydrochloride **25d** (2.73 g, 15.0 mmol), *o*-nitrobenzylsulfonyl chloride (4.32 g, 19.5 mmol) and triethylamine (5.2 mL, 3.80 g, 37.5 mmol) as a yellow oil (2.90 g, 8.78 mmol, 59 %). Purification was accomplished via column chromatography on  $\text{SiO}_2$  with hexanes/EtOAc (2 : 1).  $[\alpha]_{\text{D}}^{20} + 188$  (c 1.0 in  $\text{CHCl}_3$ ).  $R_f = 0.63$  (hexanes/EtOAc, 1 : 1, UV). FT-IR (ATR):  $\tilde{\nu} = 3321$  (w, br), 3100 (w), 2958 (m), 2872 (w), 1740 (s), 1594 (w), 1539 (vs), 1441 (m), 1422 (s), 1351 (vs), 1303 (m), 1273 (m), 1234 (m), 1204 (m), 1169 (vs), 1125 (s), 1089 (m), 1060 (m), 1020 (m), 981 (w), 901 (m), 854 (m), 819 (w), 784 (s), 740 (vs), 732 (s), 701 (m), 655 (s), 594 (vs), 574 (vs), 486 (w), 465 (w)  $\text{cm}^{-1}$ .  $^1\text{H}$ -NMR (500 MHz,  $\text{CDCl}_3$ )  $\delta$  0.90 – 0.97 (m, 6H, 5-H, 6-H), 1.57 – 1.62 (m, 2H, 3-H), 1.78 – 1.88 (m, 1H, 4-H), 3.40 (s, 3H, OMe), 4.15 – 4.26 (m, 1H, 2-H), 5.96 (d,  $J = 9.6$  Hz, 1H, NH), 7.69 – 7.77 (m, 2H, 4'-H, 5'-H), 7.89 – 7.95 (m, 1H, 3'-H), 8.03 – 8.09 (m, 1H, 6'-H).  $^{13}\text{C}$ -NMR (126 MHz,  $\text{CDCl}_3$ )  $\delta$  21.3 (C-5/C-6), 22.7 (C-6/C-5), 24.4 (C-4), 42.0 (C-3), 52.2 (OMe), 55.4 (C-2), 125.6 (C-3'), 130.5 (C-6'), 132.9 (C-5'), 133.7 (C-4'), 134.1 (C-1'), 147.7 (C-2'), 172.0 (C-1). HRMS (ESI): calc (found) for  $\text{C}_{13}\text{H}_{18}\text{N}_2\text{O}_6\text{S}$  ( $[\text{M}+\text{NH}_4]^+$ ): 348.1224 (348.1225). The spectral data are in accordance with previous reported literature.<sup>[8]</sup>

### Methyl-((2-nitrophenyl)sulfonyl)-L-isoleucinate (26e)

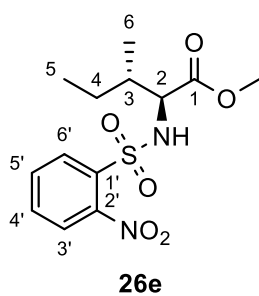

According to GP2 **26e** was prepared from methyl L-isoleucinate hydrochloride **25e** (1.82 g, 10.0 mmol), *o*-nitrobenzylsulfonyl chloride (2.88 g, 13.0 mmol) and triethylamine (3.5 mL, 2.53 g, 25.0 mmol) as a red oil (2.64 g, 8.00 mmol, 80 %). Purification was accomplished via column chromatography on  $\text{SiO}_2$  with hexanes/EtOAc (5 : 1  $\rightarrow$  4 : 1  $\rightarrow$  3 : 1).  $[\alpha]_{\text{D}}^{20} - 84$  (c 2.4 in  $\text{CHCl}_3$ ).  $R_f = 0.26$  (hexanes/EtOAc,

3 : 1, UV). FT-IR (ATR):  $\tilde{\nu}$  = 3325 (w, br), 3098 (w), 2965 (m), 2932 (w), 2879 (w), 1738 (vs), 1594 (w), 1540 (vs), 1442 (s), 1426 (s), 1355 (vs), 1299 (m), 1259 (m), 1207 (m), 1171 (vs), 1140 (s), 1125 (s), 1061 (m), 1014 (w), 988 (w), 880 (w), 854 (m), 784 (m), 742 (s), 702 (w), 655 (m), 593 (s), 569 (m), 467 (w)  $\text{cm}^{-1}$ .  $^1\text{H}$ -NMR (400 MHz,  $\text{CDCl}_3$ )  $\delta$  0.91 (t,  $J$  = 7.4 Hz, 3H, 5-H), 0.96 (d,  $J$  = 6.9 Hz, 3H, 6-H), 1.16 – 1.32 (m, 1H, 4- $\text{H}_a$ ), 1.40 – 1.54 (m, 1H, 4- $\text{H}_b$ ), 1.85 – 1.98 (m, 1H, 3-H), 3.42 (s, 3H, OMe), 4.06 (dd,  $J$  = 9.7 Hz, 5.4 Hz, 1H, 2-H), 6.04 (d,  $J$  = 9.7 Hz, 1H, NH), 7.68 – 7.76 (m, 2H, 4'-H, 5'-H), 7.88 – 7.96 (m, 1H, 3'-H), 8.02 – 8.10 (m, 1H, 6'-H).  $^{13}\text{C}$ -NMR (101 MHz,  $\text{CDCl}_3$ )  $\delta$  11.2 (C-5), 15.5 (C-6), 24.7 (C-4), 38.2 (C-3), 52.1 (OMe), 61.4 (C-2), 125.6 (C-3'), 130.5 (C-6'), 132.8 (C-5'), 133.6 (C-4'), 134.2 (C-1'), 147.7 (C-2'), 171.1 (C-1). HRMS (ESI): calc (found) for  $\text{C}_{13}\text{H}_{18}\text{N}_2\text{O}_6\text{S}$  ( $[\text{M}+\text{Na}]^+$ ): 353.0778 (353.0778). The spectral data are in accordance with previous reported literature.<sup>[9]</sup>

### Methyl-((2-nitrophenyl)sulfonyl)-L-phenylalaninate (**26f**)

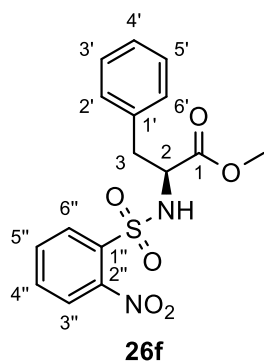

According to GP2 **26f** was prepared from methyl L-phenylalaninate hydrochloride **25f** (2.16 g, 10.0 mmol), *o*-nitrobenzylsulfonyl chloride (2.88 g, 13.0 mmol) and triethylamine (3.5 mL, 2.53 g, 25.0 mmol) as a yellow solid (2.22 g, 6.10 mmol, 61 %). Purification was accomplished via column chromatography on  $\text{SiO}_2$  with hexanes/EtOAc (5 : 1  $\rightarrow$  4 : 1  $\rightarrow$  3 : 1  $\rightarrow$  2 : 1). mp 88 °C.  $[\alpha]_{\text{D}}^{20}$  - 38 ( $c$  2.8 in  $\text{CHCl}_3$ ).  $R_f$  = 0.18 (hexanes/EtOAc, 3 : 1, UV). FT-IR (ATR):  $\tilde{\nu}$  = 3323 (w, br), 3097 (w), 3028 (w), 2954 (w), 1743 (s), 1594 (w), 1540 (vs), 1497 (w), 1440 (m), 1423 (m), 1359 (vs), 1302 (m), 1219 (m), 1169 (vs), 1105 (m), 1060 (w), 1032 (w), 962 (w), 903 (w), 854 (m), 784 (w), 740 (m), 702 (m), 655 (w), 599 (m), 575 (m), 538 (w), 494 (w)  $\text{cm}^{-1}$ .  $^1\text{H}$ -NMR (400 MHz,  $\text{CDCl}_3$ )  $\delta$  3.08 (dd,  $J$  = 13.9 Hz, 6.9 Hz, 1H, 3- $\text{H}_a$ ), 3.16 (dd,  $J$  = 13.9 Hz, 5.7 Hz, 1H, 3- $\text{H}_b$ ), 3.52 (s, 3H, OMe), 4.40 – 4.55 (m, 1H, 2-H), 5.98 (d,  $J$  = 8.7 Hz, 1H, NH), 7.07 – 7.13 (m, 2H, 2'-H, 6'-H), 7.15 – 7.25 (m, 3H, 3'-H, 4'-H, 5'-H), 7.61 – 7.73 (m, 2H, 4''-H, 5''-H), 7.80 – 7.90 (m, 1H, 3''-H), 7.92 – 8.02 (m, 1H, 6''-H).  $^{13}\text{C}$ -NMR (101 MHz,  $\text{CDCl}_3$ )  $\delta$  39.2 (C-3), 52.4 (OMe), 57.8 (C-2), 125.6 (C-3''), 127.4 (C-4'), 128.7 (C-3', C-5'), 129.3 (C-2', C-6'), 130.3 (C-6''), 132.9 (C-5''), 133.4 (C-4''), 134.3 (C-1''), 134.8 (C-1'), 147.5 (C-2''), 170.8 (C-1). HRMS (ESI): calc (found) for  $\text{C}_{16}\text{H}_{16}\text{N}_2\text{O}_6\text{S}$  ( $[\text{M}+\text{Na}]^+$ ): 387.0621 (387.0622). The spectral data are in accordance with previous reported literature.<sup>[6]</sup>

### Methyl-((2-nitrophenyl)sulfonyl)-D-phenylalaninate (**26g**)

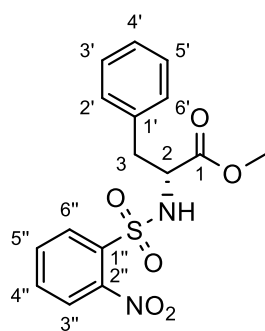

**26g**

According to GP2 **26g** was prepared from methyl D-phenylalaninate hydrochloride **25g** (3.24 g, 15.0 mmol), *o*-nitrobenzylsulfonyl chloride (4.32 g, 19.5 mmol) and triethylamine (5.2 mL, 3.80 g, 37.5 mmol) as a yellow solid (4.51 g, 12.4 mmol, 83 %). Purification was accomplished via column chromatography on SiO<sub>2</sub> with hexanes/EtOAc (3 : 1 → 1 : 1). mp 80 °C.  $[\alpha]_D^{20} + 67$  (*c* 1.0 in CHCl<sub>3</sub>). FT-IR (ATR):  $\tilde{\nu}$  = 3328 (w), 3103 (w), 3031 (w), 2956 (w), 2939 (w), 1738 (vs), 1594 (w), 1540 (vs), 1497 (m), 1450 (m), 1419 (s), 1346 (vs), 1301 (vs), 1253 (s), 1217 (s), 1200 (s), 1185 (s), 1167 (vs), 1124 (s), 1100 (vs), 1056 (m), 1033 (m), 1013 (m), 977 (m), 946 (m), 935 (m), 854 (s), 814 (m), 777 (s), 763 (m), 748 (s), 736 (vs), 704 (vs), 670 (m), 651 (s), 609 (m), 588 (vs), 555 (vs), 530 (s), 487 (m), 471 (m) cm<sup>-1</sup>. <sup>1</sup>H-NMR (700 MHz, CDCl<sub>3</sub>)  $\delta$  3.08 (dd, *J* = 13.9 Hz, 6.9 Hz, 1H, 3-H<sub>a</sub>), 3.15 (dd, *J* = 13.9 Hz, 5.7 Hz, 1H, 3-H<sub>b</sub>), 3.52 (s, 3H, OMe), 4.46 (ddd, *J* = 8.7 Hz, 6.9 Hz, 5.7 Hz, 1H, 2-H), 5.98 (d, *J* = 8.7 Hz, 1H, NH), 7.08 – 7.13 (m, 2H, 2'-H, 6'-H), 7.17 – 7.24 (m, 3H, 3'-H, 4'-H, 5'-H), 7.64 – 7.70 (m, 2H, 4''-H, 5''-H), 7.83 – 7.88 (m, 1H, 3''-H), 7.94 – 8.00 (m, 1H, 6''-H). <sup>13</sup>C-NMR (176 MHz, CDCl<sub>3</sub>)  $\delta$  39.2 (C-3), 52.5 (OMe), 57.8 (C-2), 125.6 (C-3''), 127.5 (C-4'), 128.7 (C-3', C-5'), 129.3 (C-2', C-6'), 130.3 (C-6''), 132.9 (C-5''), 133.4 (C-4''), 134.2 (C-1''), 134.8 (C-1'), 147.5 (C-2''), 170.8 (C-1).). HRMS (ESI): calc (found) for C<sub>16</sub>H<sub>16</sub>N<sub>2</sub>O<sub>6</sub>S ([M+Na]<sup>+</sup>): 387.0621 (387.0623). The spectral data are in accordance with previous reported literature.<sup>[6]</sup>

### 5-Bromo-2-methylpent-2-ene (**S1**)

The reaction was performed according to the literature.<sup>[10]</sup> A round bottom flask was charged with a solution of methyl magnesium bromide (26.0 mL, 78.0 mmol, 3 M in Et<sub>2</sub>O) under nitrogen atmosphere. Upon cooling to 0 °C a solution of methyl cyclopropyl ketone (5.9 mL, 5.05 g, 60.0 mmol) in diethyl ether (8 mL) was added dropwise and the resulting mixture was stirred for 30 min at 0 °C. Afterwards a mixture of concentrated sulfuric acid and water (36 mL, 1 : 2) was added slowly under ice-cooling, keeping the temperature under 7 °C. Stirring was continued for another 30 min at 0 °C. The organic phase was separated and the aqueous phase was extracted with diethyl ether (2 × 25 mL). The organic phases were washed with sodium hydrogen sulfite solution (5 %), saturated sodium bicarbonate solution and brine (each 1 × 45 mL). They were dried over magnesium sulfate and the solvents were evaporated. The product was obtained as a colorless oil (9.32 g, 57.2 mmol, 95 %) without further purification.

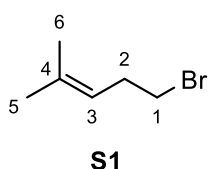

$^1\text{H-NMR}$  (300 MHz,  $\text{CDCl}_3$ )  $\delta$  1.63 (d,  $J = 1.4$  Hz, 3H, 5-H/6-H), 1.69 – 1.76 (q,  $J = 1.4$  Hz, 3H, 6-H/5-H), 2.56 (dt,  $J = 7.3$  Hz, 7.3 Hz, 2H, 2-H), 3.34 (t,  $J = 7.3$  Hz, 2H, 1-H), 5.13 (tdq,  $J = 7.3$  Hz, 2.9 Hz, 1.4 Hz, 1H, 3-H).

$^{13}\text{C-NMR}$  (75 MHz,  $\text{CDCl}_3$ )  $\delta$  17.9 (C-2), 25.7 (C-1), 31.8 (C-5), 32.9 (C-6),

121.0 (C-4), 135.0 (C-3). The spectral data are in accordance with previous reported literature.<sup>[10]</sup>

### GP3: *N*-Alkylation of amino acid methyl esters

The *N*-alkylated amino acid methyl esters were prepared according to the literature.<sup>[6]</sup> A round bottom flask was charged with a solution of the amino acid methyl ester (8.00 mmol) in dimethylformamide (60 mL) under nitrogen atmosphere. Cesium carbonate (3.91 g, 12.0 mmol) and 5-bromo-2-methylpent-2-ene (1.96 g, 12.0 mmol) were added and the mixture was stirred for 20 h at 60 °C. After cooling to room temperature diethyl ether (120 mL) was added. The organic phase was washed with water ( $2 \times 60$  mL) and brine ( $2 \times 40$  mL) and dried over sodium sulfate. The solvents were evaporated and the crude product was purified by column chromatography. The products were isolated as oils.

#### Methyl-*N*-(4-methylpent-3-en-1-yl)-*N*-((2-nitrophenyl)sulfonyl)-L-valinate (**27a**)

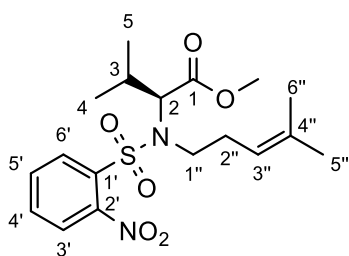

**27a**

According to GP3 **27a** was prepared from methyl-((2-nitrophenyl)sulfonyl)-L-valinate **26a** (2.83 g, 8.94 mmol), cesium carbonate (4.37 g, 13.4 mmol) and 5-bromo-2-methylpent-2-ene **S1** (2.19 g, 13.4 mmol) as a yellow oil (1.56 g, 3.92 mmol, 44 %). Purification was accomplished via column chromatography on  $\text{SiO}_2$  with hexanes/EtOAc (3 : 1).

Reisolation of starting material **26a** was possible (0.55 g, 1.74 mmol, 19 %).  $[\alpha]_{\text{D}}^{20} - 70$  ( $c$  1.0 in  $\text{CHCl}_3$ ).  $R_f = 0.61$  (hexanes/EtOAc, 2 : 1, anisaldehyde solution). FT-IR (ATR):  $\tilde{\nu} = 3096$  (w), 2968 (m), 2933 (w), 2916 (w), 2878 (w), 1740 (s), 1590 (w), 1544 (vs), 1469 (m), 1372 (s), 1352 (s), 1291 (m), 1249 (w), 1204 (m), 1165 (s), 1146 (s), 1126 (s), 1067 (m), 1009 (m), 973 (m), 891 (w), 852 (m), 817 (w), 776 (m), 749 (m), 653 (w), 585 (s), 565 (m), 525 (w)  $\text{cm}^{-1}$ .  $^1\text{H-NMR}$  (400 MHz,  $\text{CDCl}_3$ )  $\delta$  0.97 (d,  $J = 6.7$  Hz, 3H, 4-H/5-H), 1.02 (d,  $J = 6.7$  Hz, 3H, 5-H/4-H), 1.63 (s, 3H, 5''-H/6''-H), 1.69 (s, 3H, 6''-H/5''-H), 2.10 – 2.36 (m, 2H, 3-H, 2''-H<sub>a</sub>), 2.37 – 2.56 (m, 1H, 2''-H<sub>b</sub>), 3.24 – 3.47 (m, 2H, 1''-H), 3.54 (s, 3H, OMe), 4.15 (d,  $J = 10.3$  Hz, 1H, 2-H), 5.01 – 5.07 (m, 1H, 3''-H), 7.52 – 7.61 (m, 1H, 3'-H), 7.61 – 7.74 (m, 2H, 4'-H, 5'-H), 7.90 – 8.10 (m, 1H, 6'-H).  $^{13}\text{C-NMR}$  (101 MHz,  $\text{CDCl}_3$ )  $\delta$  17.8 (C-5''/C-6''), 19.6 (C-4, C-5), 25.7 (C-6''/C-5''), 28.8 (C-3), 29.7 (C-2''), 45.8 (C-1'), 51.7 (OMe), 65.9 (C-2), 119.8 (C-3'),

123.8 (C-3'), 130.8 (C-6'), 131.2 (C-5'), 133.2 (C-1'), 133.5 (C-4'), 134.8 (C-4''), 148.4 (C-2'), 170.7 (C-1). HRMS (ESI): calc (found) for C<sub>18</sub>H<sub>26</sub>N<sub>2</sub>O<sub>6</sub>S ([M+Na]<sup>+</sup>): 421.1404 (421.1406).

#### Methyl-*N*-(4-methylpent-3-en-1-yl)-*N*-((2-nitrophenyl)sulfonyl)-*D*-valinate (**27b**)

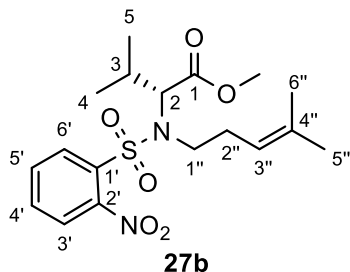

According to GP3 **27b** was prepared from methyl-((2-nitrophenyl)sulfonyl)-*D*-valinate **26b** (2.76 g, 8.73 mmol), cesium carbonate (4.27 g, 13.1 mmol) and 5-bromo-2-methylpent-2-ene **S1** (2.14 g, 13.1 mmol) as a yellow oil (2.01 g, 5.05 mmol, 58 %). Purification was accomplished via column chromatography on SiO<sub>2</sub> with hexanes/EtOAc (3 : 1). Starting

material **26b** was reisolated (0.49 g, 1.54 mmol, 18 %).  $[\alpha]_D^{20} + 58$  (*c* 1.0 in CHCl<sub>3</sub>). *R*<sub>f</sub> = 0.44 (hexanes/EtOAc, 3 : 1, anisaldehyde solution). FT-IR (ATR):  $\tilde{\nu}$  = 3100 (w), 2969 (m), 2933 (w), 2878 (w), 1741 (s), 1590 (w), 1546 (vs), 1438 (m), 1373 (s), 1352 (s), 1291 (m), 1204 (m), 1165 (s), 1146 (s), 1126 (m), 1068 (m), 1009 (m), 973 (m), 891 (w), 776 (m), 749 (m), 652 (w), 585 (s), 565 (m) cm<sup>-1</sup>. <sup>1</sup>H-NMR (500 MHz, CDCl<sub>3</sub>)  $\delta$  0.97 (d, *J* = 6.5 Hz, 3H, 4-H/5-H), 1.02 (d, *J* = 6.5 Hz, 3H, 5''-H/6''-H), 1.63 (s, 3H, 5''-H/6''-H), 1.69 (s, 3H, 6''-H/5''-H), 2.15 – 2.24 (m, 1H, 3-H), 2.24 – 2.34 (m, 1H, 2''-H<sub>a</sub>), 2.39 – 2.51 (m, 1H, 2''-H<sub>b</sub>), 3.28 – 3.43 (m, 2H, 1''-H), 3.54 (s, 3H, OMe), 4.15 (d, *J* = 10.2 Hz, 1H, 2-H), 5.01 – 5.09 (m, 1H, 3''-H), 7.54 – 7.60 (m, 1H, 3'-H), 7.63 – 7.73 (m, 2H, 4'-H, 5'-H), 7.98 – 8.04 (m, 1H, 6'-H). <sup>13</sup>C-NMR (126 MHz, CDCl<sub>3</sub>)  $\delta$  17.8 (C-5''/C-6''), 19.6 (C-4, C-5), 25.7 (C-6''/C-5''), 28.8 (C-3), 29.7 (C-2''), 45.8 (C-1''), 51.8 (OMe), 65.9 (C-2), 119.8 (C-3''), 123.8 (C-3'), 130.8 (C-6'), 131.2 (C-5'), 133.2 (C-1'), 133.4 (C-4'), 134.9 (C-4''), 148.3 (C-2'), 170.7 (C-1). HRMS (ESI): calc (found) for C<sub>18</sub>H<sub>26</sub>N<sub>2</sub>O<sub>6</sub>S ([M+Na]<sup>+</sup>): 421.1404 (421.1399).

#### Methyl-*N*-(4-methylpent-3-en-1-yl)-*N*-((2-nitrophenyl)sulfonyl)-*L*-leucinate (**27c**)

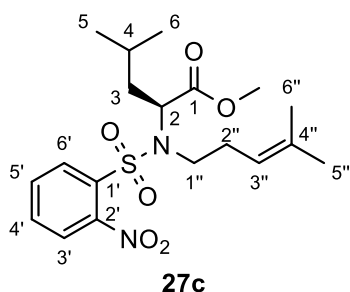

According to GP3 **27c** was prepared from methyl-((2-nitrophenyl)sulfonyl)-*L*-leucinate **26c** (4.85 g, 14.7 mmol), cesium carbonate (7.18 g, 22.0 mmol) and 5-bromo-2-methylpent-2-ene **S1** (3.59 g, 22.0 mmol) as a yellow oil (4.43 g, 10.7 mmol, 73 %). Purification was accomplished via column chromatography on SiO<sub>2</sub> with hexanes/EtOAc (3 : 1). Starting

material **26c** was reisolated (0.19 g, 0.58 mmol, 4 %).  $[\alpha]_D^{20} + 13$  (*c* 1.0 in CHCl<sub>3</sub>). *R*<sub>f</sub> = 0.58 (hexanes/EtOAc, 3 : 1, anisaldehyde solution). FT-IR (ATR):  $\tilde{\nu}$  = 2957 (m), 2871 (w), 1743 (s), 1591 (w), 1545 (vs), 1438 (m), 1373 (s), 1354 (s), 1253 (m), 1205 (m), 1154 (s), 1127 (m), 1068 (w), 1005 (w), 964 (w), 947 (w), 906 (w), 852 (w), 775 (m), 755 (m), 733 (m), 652 (w),

587 (m), 567 (m)  $\text{cm}^{-1}$ .  $^1\text{H-NMR}$  (500 MHz,  $\text{CDCl}_3$ ):  $\delta$  0.98 (d,  $J = 6.3$  Hz, 3H, 5-H/6-H), 1.00 (d,  $J = 6.3$  Hz, 3H, 6-H/5-H), 1.61 – 1.72 (m, 1H, 3- $\text{H}_a$ ), 1.65 (s, 3H, 5''-H/6''-H), 1.70 (s, 3H, 6''-H/5''-H), 1.72 – 1.90 (m, 2H, 3- $\text{H}_b$ , 4-H), 2.18 – 2.28 (m, 1H, 2''- $\text{H}_a$ ), 2.50 – 2.61 (m, 1H, 2''- $\text{H}_b$ ), 3.00 (ddd,  $J = 15.4$  Hz, 12.0 Hz, 5.3 Hz, 1H, 1''- $\text{H}_a$ ), 3.39 (ddd,  $J = 15.4$  Hz, 12.0 Hz, 4.8 Hz, 1H, 1''- $\text{H}_b$ ), 3.50 (s, 3H, OMe), 4.69 (dd,  $J = 10.4$  Hz, 4.5 Hz, 1H, 2-H), 5.02 – 5.09 (m, 1H, 3''-H), 7.53 – 7.58 (m, 1H, 3'-H), 7.65 – 7.71 (m, 2H, 4'-H/5'-H), 8.00 – 8.07 (m, 1H, 6'-H).  $^{13}\text{C-NMR}$  (126 MHz,  $\text{CDCl}_3$ ):  $\delta$  17.9 (C-5''/C-6''), 21.2 (C-5/C-6), 23.0 (C-6/C-5), 24.4 (C-4), 25.7 (C-6''/C-5''), 30.3 (C-2''), 39.3 (C-3), 46.6 (C-1), 52.1 (OMe), 59.1 (C-2), 119.8 (C-3''), 123.9 (C-3'), 131.0 (C-6'), 131.2 (C-5'), 132.8 (C-1'), 133.3 (C-4'), 134.8 (C-4''), 148.2 (C-2'), 171.7 (C-1). HRMS (ESI): calc (found) for  $\text{C}_{19}\text{H}_{28}\text{N}_2\text{O}_6\text{S}$  ( $[\text{M}+\text{Na}]^+$ ): 435.1560 (435.1557).

### Methyl-*N*-(4-methylpent-3-en-1-yl)-*N*-((2-nitrophenyl)sulfonyl)-D-leucinate (**27d**)

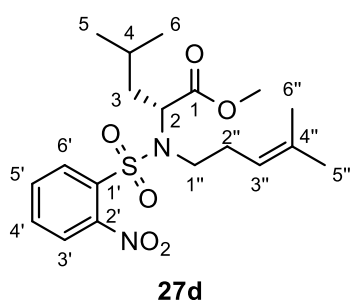

According to GP3 **27d** was prepared from methyl-((2-nitrophenyl)sulfonyl)-D-leucinate **26d** (2.64 g, 8.00 mmol), cesium carbonate (3.91 g, 12.0 mmol) and 5-bromo-2-methylpent-2-ene **S1** (1.96 g, 12.0 mmol) as a yellow oil (2.02 g, 4.88 mmol, 61 %). Purification was accomplished via column chromatography on  $\text{SiO}_2$  with hexanes/EtOAc (3 : 1).  $[\alpha]_{\text{D}}^{20} - 21$

( $c$  1.0 in  $\text{CHCl}_3$ ).  $R_f = 0.56$  (hexanes/EtOAc, 3 : 1, anisaldehyde solution). FT-IR (ATR):  $\tilde{\nu} = 2956$  (m), 2872 (w), 1741 (s), 1590 (w), 1543 (vs), 1438 (m), 1372 (vs), 1352 (vs), 1293 (w), 1252 (m), 1204 (m), 1152 (vs), 1126 (s), 1067 (m), 1004 (m), 963 (m), 946 (m), 906 (w), 852 (m), 838 (w), 775 (m), 754 (s), 732 (s), 652 (m), 586 (vs), 566 (s)  $\text{cm}^{-1}$ .  $^1\text{H-NMR}$  (500 MHz,  $\text{CDCl}_3$ )  $\delta$  0.98 (d,  $J = 6.3$  Hz, 3H, 5-H/6-H), 1.00 (d,  $J = 6.3$  Hz, 3H, 6-H/5-H), 1.61 – 1.72 (m, 1H, 3- $\text{H}_a$ ), 1.65 (s, 3H, 5''-H/6''-H), 1.69 (s, 3H, 6''-H/5''-H), 1.74 – 1.89 (m, 2H, 3- $\text{H}_b$ , 4-H), 2.16 – 2.30 (m, 1H, 2''- $\text{H}_a$ ), 2.50 – 2.61 (m, 1H, 2''- $\text{H}_b$ ), 3.01 (ddd,  $J = 15.4$  Hz, 12.0 Hz, 5.3 Hz, 1H, 1''- $\text{H}_a$ ), 3.39 (ddd,  $J = 15.4$  Hz, 12.0 Hz, 4.8 Hz, 1H, 1''- $\text{H}_b$ ), 3.50 (s, 3H, OMe), 4.69 (dd,  $J = 10.4$  Hz, 4.5 Hz, 1H, 2-H), 5.02 – 5.09 (m, 1H, 3''-H), 7.52 – 7.58 (m, 1H, 3'-H), 7.64 – 7.72 (m, 2H, 4'-H, 5'-H), 7.99 – 8.07 (m, 1H, 6'-H).  $^{13}\text{C-NMR}$  (126 MHz,  $\text{CDCl}_3$ )  $\delta$  17.9 (C-5''/C-6''), 21.2 (C-5/C-6), 23.0 (C-6/C-5), 24.4 (C-4), 25.7 (C-6''/C-5''), 30.3 (C-2''), 39.3 (C-3), 46.6 (C-1), 52.1 (OMe), 59.1 (C-2), 119.8 (C-3''), 123.9 (C-3'), 131.0 (C-6'), 131.2 (C-5'), 132.8 (C-1'), 133.4 (C-4'), 134.8 (C-4''), 148.2 (C-2'), 171.7 (C-1). HRMS (ESI): calc (found) for  $\text{C}_{19}\text{H}_{28}\text{N}_2\text{O}_6\text{S}$  ( $[\text{M}+\text{Na}]^+$ ): 435.1560 (435.1561).

### Methyl-*N*-(4-methylpent-3-en-1-yl)-*N*-((2-nitrophenyl)sulfonyl)-*L*-isoleucinate (**27e**)

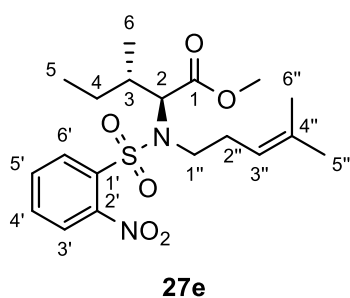

According to GP3 **27e** was prepared from methyl-((2-nitrophenyl)sulfonyl)-*L*-isoleucinate **26e** (0.28 g, 0.84 mmol), cesium carbonate (0.41 g, 1.26 mmol) and 5-bromo-2-methylpent-2-ene **S1** (0.21 g, 1.26 mmol) as a yellow oil (0.26 g, 0.63 mmol, 75 %). Purification was accomplished via column chromatography on SiO<sub>2</sub> with hexanes/EtOAc (3 : 1).  $[\alpha]_D^{20}$  - 70

(*c* 1.0 in CHCl<sub>3</sub>).  $R_f$  = 0.32 (hexanes/EtOAc, 5 : 1, anisaldehyde solution). FT-IR (ATR):  $\tilde{\nu}$  = 2967 (m), 2933 (w), 2878 (w), 1739 (s), 1590 (w), 1544 (vs), 1437 (m), 1372 (s), 1351 (vs), 1290 (w), 1257 (m), 1199 (m), 1168 (s), 1145 (vs), 1125 (s), 1067 (m), 996 (m), 960 (m), 912 (m), 889 (m), 851 (s), 775 (s), 731 (vs), 652 (m), 584 (vs), 567 (vs), 524 (w), 455 (w) cm<sup>-1</sup>. <sup>1</sup>H-NMR (400 MHz, CDCl<sub>3</sub>)  $\delta$  0.86 – 0.95 (m, 6H, 5-H, 6-H), 1.04 – 1.19 (m, 1H, 4-H<sub>a</sub>), 1.62 (s, 3H, 5''-H/6''-H), 1.68 (s, 3H, 6''-H/5''-H), 1.70 – 1.80 (m, 1H, 4-H<sub>b</sub>), 1.85 – 1.98 (m, 1H, 3-H), 2.14 – 2.32 (m, 1H, 2''-H<sub>a</sub>), 2.40 – 2.54 (m, 1H, 2''-H<sub>b</sub>), 3.27 – 3.45 (m, 2H, 1''-H), 3.49 (s, 3H, OMe), 4.20 (d,  $J$  = 10.1 Hz, 1H, 2-H), 5.04 (t,  $J$  = 7.3 Hz, 1H, 3''-H), 7.50 – 7.58 (m, 1H, 3'-H), 7.61 – 7.72 (m, 2H, 4'-H, 5'-H), 7.92 – 8.04 (m, 1H, 6'-H). <sup>13</sup>C-NMR (101 MHz, CDCl<sub>3</sub>)  $\delta$  11.0 (C-5), 15.6 (C-6), 17.8 (C-5''), 25.4 (C-4), 25.7 (C-6''), 30.0 (C-2''), 35.2 (C-3), 45.8 (C-1''), 51.6 (OMe), 64.8 (C-2), 119.8 (C-3''), 123.8 (C-3'), 130.8 (C-6'), 131.2 (C-5'), 133.0 (C-1'), 133.5 (C-4'), 134.7 (C-4''), 148.3 (C-2'), 170.7 (C-1). HRMS (ESI): calc (found) for C<sub>19</sub>H<sub>28</sub>N<sub>2</sub>O<sub>6</sub>S ([M+Na]<sup>+</sup>): 435.1560 (435.1565).

### Methyl-*N*-(4-methylpent-3-en-1-yl)-*N*-((2-nitrophenyl)sulfonyl)-*L*-phenylalaninate (**27f**)

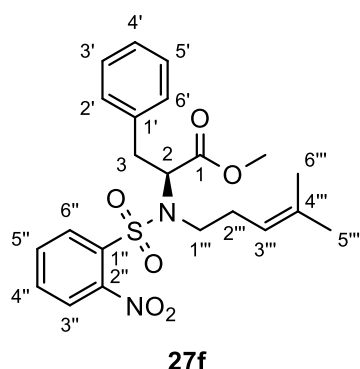

According to GP3 **27f** was prepared from methyl-((2-nitrophenyl)sulfonyl)-*L*-phenylalaninate **26f** (2.17 g, 5.94 mmol), cesium carbonate (2.90 g, 8.91 mmol) and 5-bromo-2-methylpent-2-ene **S1** (1.45 g, 8.91 mmol) as a yellow oil (1.42 g, 3.18 mmol, 53 %). Starting material **26f** was reisolated (0.08 g, 0.23 mmol, 4 %). Purification was accomplished via column chromatography on SiO<sub>2</sub> with

hexanes/EtOAc (3 : 1 → 2 : 1).  $[\alpha]_D^{20}$  - 24 (*c* 1.0 in CHCl<sub>3</sub>).  $R_f$  = 0.24 (hexanes/EtOAc, 4 : 1, anisaldehyde solution). FT-IR (ATR):  $\tilde{\nu}$  = 3030 (w), 2954 (w), 2925 (w), 1742 (s), 1589 (w), 1543 (vs), 1497 (w), 1454 (m), 1438 (m), 1373 (s), 1352 (s), 1205 (m), 1164 (vs), 1127 (s), 1090 (m), 1070 (m), 1011 (m), 950 (w), 852 (m), 776 (m), 749 (s), 700 (m), 652 (w), 588 (m), 577 (m), 543 (w) cm<sup>-1</sup>. <sup>1</sup>H-NMR (400 MHz, CDCl<sub>3</sub>)  $\delta$  1.62 (s, 3H, 5'''-H/6'''-H), 1.69 (s, 3H,

6'''-H/5''-H), 2.18 – 2.41 (m, 2H, 2'''-H), 3.04 (dd,  $J = 14.2$  Hz, 7.2 Hz, 1H, 3-H<sub>a</sub>), 3.16 – 3.30 (ddd,  $J = 15.2$  Hz, 11.3 Hz, 5.5 Hz, 1H, 1'''-H<sub>a</sub>), 3.34 – 3.48 (m, 2H, 1'''-H<sub>b</sub>, 3-H<sub>b</sub>), 3.55 (s, 3H, OMe), 4.90 (t,  $J = 7.2$  Hz, 1H, 2-H), 5.00 – 5.08 (m, 1H, 3'''-H), 7.18 – 7.33 (m, 5H, 2'-H, 3'-H, 4'-H, 5'-H, 6'-H), 7.54 – 7.62 (m, 2H, 3''-H, 5''-H), 7.62 – 7.70 (m, 1H, 4''-H), 7.84 – 7.90 (m, 1H, 6''-H). <sup>13</sup>C-NMR (101 MHz, CDCl<sub>3</sub>)  $\delta$  17.9 (C-5'''/C-6'''), 25.7 (C-6'''/C-5'''), 29.4 (C-2'''), 36.8 (C-3), 46.2 (C-1'''), 52.3 (OMe), 61.3 (C-2), 119.7 (C-3'''), 124.0 (C-5''), 127.0 (C-4'), 128.6 (C-3', C-5'), 129.2 (C-2', C-6'), 130.9 (C-6''), 131.4 (C-3''), 133.4 (C-1'', C-4''), 134.9 (C-4'''), 136.4 (C-1'), 148.3 (C-2''), 170.7 (C-1). HRMS (ESI): calc (found) for C<sub>22</sub>H<sub>26</sub>N<sub>2</sub>O<sub>6</sub>S ([M+Na]<sup>+</sup>): 469.1404 (469.1403).

**Methyl-*N*-(4-methylpent-3-en-1-yl)-*N*-((2-nitrophenyl)sulfonyl)-*D*-phenylalaninate (**27g**)**

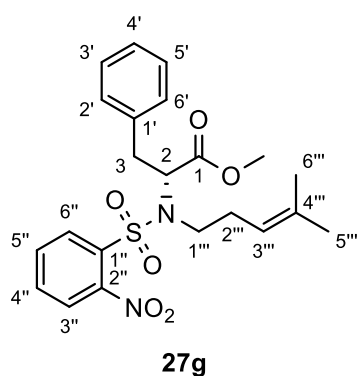

According to GP3 **27g** was prepared from methyl-((2-nitrophenyl)sulfonyl)-*D*-phenylalaninate **26g** (4.37 g, 12.0 mmol), cesium carbonate (5.86 g, 18.0 mmol) and 5-bromo-2-methylpent-2-ene **S1** (2.94 g, 18.0 mmol) as a yellow oil (3.03 g, 3.18 mmol, 56 %). Purification was accomplished via column chromatography on SiO<sub>2</sub> with hexanes/EtOAc (2 : 1).  $[\alpha]_D^{20} + 21$  ( $c$  1.0 in CHCl<sub>3</sub>).  $R_f = 0.58$  (hexanes/EtOAc, 2 : 1, anisaldehyde solution). FT-IR (ATR):  $\tilde{\nu} = 3029$  (w), 2953 (w),

1741 (s), 1589 (w), 1542 (vs), 1497 (w), 1454 (m), 1438 (m), 1373 (s), 1350 (vs), 1205 (m), 1163 (vs), 1126 (s), 1090 (m), 1069 (m), 1008 (m), 949 (m), 895 (w), 852 (m), 838 (w), 775 (m), 748 (vs), 700 (s), 652 (m), 588 (s), 576 (s) cm<sup>-1</sup>. <sup>1</sup>H-NMR (500 MHz, CDCl<sub>3</sub>)  $\delta$  1.61 (s, 3H, 5'''-H/6'''-H), 1.68 (s, 3H, 6'''-H/5'''-H), 2.19 – 2.38 (m, 2H, 2'''-H), 3.04 (dd,  $J = 14.2$  Hz, 7.2 Hz, 1H, 3-H<sub>a</sub>), 3.21 (ddd,  $J = 15.2$  Hz, 11.3 Hz, 5.5 Hz, 1H, 1'''-H<sub>a</sub>), 3.34 – 3.45 (m, 2H, 1'''-H<sub>b</sub>, 3-H<sub>b</sub>), 3.54 (s, 3H, OMe), 4.89 (t,  $J = 7.2$  Hz, 1H, 2-H), 4.99 – 5.07 (m, 1H, 3'''-H), 7.18 – 7.30 (m, 5H, 2'-H, 3'-H, 4'-H, 5'-H, 6'-H), 7.54 – 7.61 (m, 2H, 3''-H, 5''-H), 7.62 – 7.68 (m, 1H, 4''-H), 7.82 – 7.87 (m, 1H, 6''-H). <sup>13</sup>C-NMR (126 MHz, CDCl<sub>3</sub>)  $\delta$  17.9 (C-5'''/C-6'''), 25.7 (C-6'''/C-5'''), 29.4 (C-2'''), 36.8 (C-3), 46.2 (C-1'''), 52.3 (OMe), 61.3 (C-2), 119.7 (C-3'''), 124.0 (C-5''), 127.0 (C-4'), 128.6 (C-3', C-5'), 129.2 (C-2', C-6'), 130.8 (C-6''), 131.5 (C-3''), 133.3 (C-1''), 133.4 (C-4''), 135.0 (C-4'''), 136.4 (C-1'), 148.2 (C-2''), 170.7 (C-1). HRMS (ESI): calc (found) for C<sub>22</sub>H<sub>26</sub>N<sub>2</sub>O<sub>6</sub>S ([M+Na]<sup>+</sup>): 469.1404 (469.1403).

#### GP4: Reduction via lithium aluminium hydride

The amino alcohols were prepared according to the literature.<sup>[6]</sup> A round bottom flask was charged with a solution of the methyl ester (4.00 mmol) in tetrahydrofuran (18 mL) under nitrogen atmosphere. Upon cooling to 0 °C a solution of lithium aluminium hydride (0.17 g, 4.40 mmol, 0.5 M in THF) was added dropwise. The reaction mixture was stirred for 30 min at 0 °C. Afterwards the reaction was quenched with water (1.0 mL) and dichloromethane (35 mL) was added. The organic phase was washed with hydrochloric acid (1 × 15 mL, 1 M in Wasser) and brine (2 × 15 mL) and dried over magnesium sulfate. The solvents were evaporated and the crude product was purified by column chromatography. The products were isolated as oils.

#### (S)-N-(1-Hydroxy-3-methylbutan-2-yl)-N-(4-methylpent-3-en-1-yl)-2-nitrobenzene sulfonamide (**28a**)

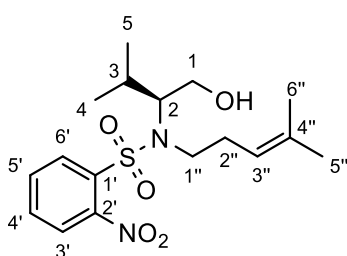

**28a**

According to GP4 **28a** was prepared from methyl-*N*-(4-methylpent-3-en-1-yl)-*N*-((2-nitrophenyl)sulfonyl)-L-valinate **27a** (0.98 g, 2.45 mmol) and lithium aluminium hydride (0.10 g, 2.70 mmol) as a yellow oil (0.66 g, 1.77 mmol, 72 %). Purification was accomplished via column chromatography on SiO<sub>2</sub> with hexanes/EtOAc (3 : 1).  $[\alpha]_D^{20} + 59$  (c 1.0 in CHCl<sub>3</sub>).

$R_f = 0.35$  (hexanes/EtOAc, 2 : 1, anisaldehyde solution). FT-IR (ATR):  $\tilde{\nu} = 3556$  (w), 3097 (w), 2968 (m), 2929 (m), 2879 (w), 1590 (w), 1544 (vs), 1469 (w), 1440 (w), 1373 (s), 1341 (s), 1295 (w), 1249 (w), 1202 (w), 1160 (s), 1125 (m), 1089 (w), 1065 (m), 1000 (w), 956 (w), 923 (w), 852 (w), 774 (w), 745 (w), 653 (w), 594 (m), 528 (w) cm<sup>-1</sup>. <sup>1</sup>H-NMR (400 MHz, CDCl<sub>3</sub>)  $\delta$  0.80 (d,  $J = 6.6$  Hz, 3H, 4-H/5-H), 0.96 (d,  $J = 6.6$  Hz, 3H, 5-H/4-H), 1.65 (s, 3H, 5''-H/6''-H), 1.70 (s, 3H, 6''-H/5''-H), 1.73 – 1.87 (m, 1H, 3-H), 1.87 – 2.29 (m, 1H, OH), 2.32 – 2.56 (m, 2H, 2''-H), 3.12 (ddd,  $J = 15.2$  Hz, 11.4 Hz, 5.4 Hz, 1H, 1''-H<sub>a</sub>), 3.34 (ddd,  $J = 15.2$  Hz, 11.4 Hz, 5.4 Hz, 1H, 1''-H<sub>b</sub>), 3.51 – 3.66 (m, 2H, 1-H<sub>a</sub>, 2-H), 3.81 – 3.96 (m, 1H, 1-H<sub>b</sub>), 5.07 (t,  $J = 7.3$  Hz, 1H, 3''-H), 7.51 – 7.60 (m, 1H, 3'-H), 7.62 – 7.72 (m, 2H, 4'-H, 5'-H), 8.03 – 8.14 (m, 1H, 6'-H). <sup>13</sup>C-NMR (101 MHz, CDCl<sub>3</sub>)  $\delta$  17.9 (C-5''/C-6''), 20.2 (C-4/C-5), 20.3 (C-5/C-4), 25.7 (C-6''/C-5''), 28.9 (C-3), 30.1 (C-2''), 44.4 (C-1''), 62.1 (C-1), 66.1 (C-2), 120.0 (C-3''), 123.8 (C-3'), 131.3 (C-6'), 131.4 (C-5'), 133.3 (C-4'), 134.0 (C-1'), 134.9 (C-4''), 147.9 (C-2'). HRMS (ESI): calc (found) for C<sub>17</sub>H<sub>26</sub>N<sub>2</sub>O<sub>5</sub>S ([M+Na]<sup>+</sup>): 393.1455 (393.1465). The spectral data are in accordance with previous reported literature.<sup>[6]</sup>

**(R)-N-(1-Hydroxy-3-methylbutan-2-yl)-N-(4-methylpent-3-en-1-yl)-2-nitrobenzene-sulfonamide (28b)**

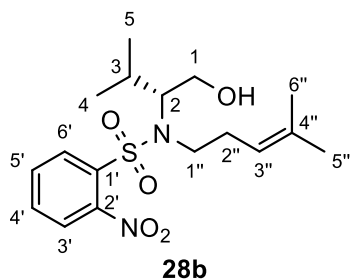

According to GP4 **28b** was prepared from methyl-*N*-(4-methylpent-3-en-1-yl)-*N*-((2-nitrophenyl)sulfonyl)-D-valinate **27b** (2.00 g, 5.02 mmol) and lithium aluminium hydride (0.21 g, 5.52 mmol) as a yellow oil (1.33 g, 3.60 mmol, 72 %). Purification was accomplished via column chromatography on SiO<sub>2</sub> with hexanes/EtOAc (3 : 1).  $[\alpha]_D^{20}$  - 65 (*c* 1.0 in CHCl<sub>3</sub>).

$R_f$  = 0.30 (hexanes/EtOAc, 3 : 1, anisaldehyde solution). FT-IR (ATR):  $\tilde{\nu}$  = 3551 (w), 2967 (w), 2254 (w), 1543 (s), 1470 (w), 1440 (w), 1372 (m), 1340 (m), 1202 (w), 1156 (m), 1125 (m), 1088 (w), 1064 (m), 999 (w), 956 (w), 907 (vs), 852 (m), 771 (w), 726 (vs), 650 (m), 592 (s), 450 (w) cm<sup>-1</sup>. <sup>1</sup>H-NMR (500 MHz, CDCl<sub>3</sub>)  $\delta$  0.78 (d, *J* = 6.5 Hz, 3H, 4-H/5-H), 0.95 (d, *J* = 6.5 Hz, 3H, 5-H/4-H), 1.64 (s, 3H, 5''-H/6''-H), 1.69 (s, 3H, 6''-H/5''-H), 1.74 – 1.88 (m, 1H, 3-H), 2.25 (s, br, 1H, OH), 2.33 – 2.54 (m, 2H, 2''-H), 3.12 (ddd, *J* = 15.1 Hz, 11.5 Hz, 5.4 Hz, 1H, 1''-H<sub>a</sub>), 3.34 (ddd, *J* = 15.1 Hz, 11.5 Hz, 5.4 Hz, 1H, 1''-H<sub>b</sub>), 3.52 – 3.66 (m, 2H, 1-H<sub>a</sub>, 2-H), 3.82 – 3.93 (m, 1H, 1-H<sub>b</sub>), 5.03 – 5.11 (m, 1H, 3''-H), 7.52 – 7.58 (m, 1H, 3'-H), 7.64 – 7.71 (m, 2H, 4'-H, 5'-H), 8.04 – 8.12 (m, 1H, 6'-H). <sup>13</sup>C-NMR (126 MHz, CDCl<sub>3</sub>)  $\delta$  17.9 (C-5''/C-6''), 20.2 (C-4/C-5), 20.3 (C-5/C-4), 25.7 (C-6''/C-5''), 28.8 (C-3), 30.1 (C-2''), 44.4 (C-1''), 62.1 (C-1), 66.0 (C-2), 120.0 (C-3''), 123.8 (C-3'), 131.2 (C-6'), 131.5 (C-5'), 133.4 (C-4'), 133.8 (C-1'), 134.8 (C-4''), 147.8 (C-2'). HRMS (ESI): calc (found) for C<sub>17</sub>H<sub>26</sub>N<sub>2</sub>O<sub>5</sub>S ([M+Na]<sup>+</sup>): 393.1455 (393.1459).

**(S)-N-(1-Hydroxy-4-methylpentan-2-yl)-N-(4-methylpent-3-en-1-yl)-2-nitrobenzene-sulfonamide (28c)**

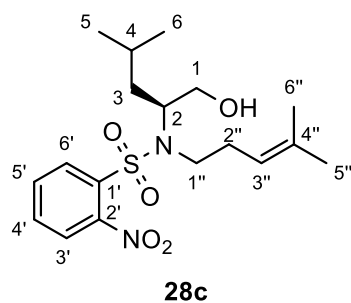

According to GP4 **28c** was prepared from methyl-*N*-(4-methylpent-3-en-1-yl)-*N*-((2-nitrophenyl)sulfonyl)-L-leucinate **27c** (2.42 g, 5.87 mmol) and lithium aluminium hydride (0.25 g, 6.46 mmol) as a yellow oil (1.69 g, 4.39 mmol, 75 %). Purification was accomplished via column chromatography on SiO<sub>2</sub> with hexanes/EtOAc (3 : 1 → 1 : 1).  $[\alpha]_D^{20}$  + 15 (*c* 1.0 in CHCl<sub>3</sub>).

$R_f$  = 0.24 (hexanes/EtOAc, 2 : 1, anisaldehyde solution). FT-IR (ATR):  $\tilde{\nu}$  = 3543 (w), 2958 (m), 1545 (vs), 1468 (w), 1440 (w), 1372 (s), 1341 (m), 1202 (w), 1158 (s), 1125 (m), 1064 (w), 949 (w), 852 (w), 745 (w), 653 (w), 590 (m) cm<sup>-1</sup>. <sup>1</sup>H-NMR (500 MHz, CDCl<sub>3</sub>)  $\delta$  0.82 (d, *J* = 6.6 Hz, 3H, 5-H/6-H), 0.84 (d, *J* = 6.6 Hz, 3H, 6-H/5-H), 1.30 (ddd, *J* = 14.1 Hz, 7.1 Hz,

7.1 Hz, 1H, 3-H<sub>a</sub>), 1.39 (ddd,  $J = 14.1$  Hz, 7.1 Hz, 7.1 Hz, 1H, 3-H<sub>b</sub>), 1.55 – 1.63 (m, 1H, 4-H), 1.64 (s, 3H, 5''-H/6''-H), 1.71 (s, 3H, 6''-H/5''-H), 2.13 (s, br, 1H, OH), 2.28 – 2.37 (m, 1H, 2''-H<sub>a</sub>), 2.39 – 2.50 (m, 1H, 2''-H<sub>b</sub>), 3.22 (t,  $J = 8.3$  Hz, 2H, 1''-H), 3.52 – 3.63 (m, 2H, 1-H), 3.84 – 3.92 (m, 1H, 2-H), 5.05 – 5.12 (m, 1H, 3''-H), 7.57 – 7.63 (m, 1H, 3'-H), 7.65 – 7.72 (m, 2H, 4'-H, 5'-H), 8.08 – 8.14 (m, 1H, 6'-H). <sup>13</sup>C-NMR (126 MHz, CDCl<sub>3</sub>)  $\delta$  17.9 (C-5''/C-6''), 22.5 (C-5, C-6), 24.6 (C-4), 25.7 (C-6''/C-5''), 30.6 (C-8), 39.3 (C-3), 43.8 (C-1''), 58.3 (C-2), 63.3 (C-1), 119.9 (C-3''), 124.1 (C-3'), 131.6 (C-5', C-6'), 133.5 (C-4'), 133.7 (C-1'), 134.9 (C-4''), 147.9 (C-2'). HRMS (ESI): calc (found) for C<sub>18</sub>H<sub>28</sub>N<sub>2</sub>O<sub>5</sub>S ([M+Na]<sup>+</sup>): 407.1611 (407.1618).

**(R)-N-(1-Hydroxy-4-methylpentan-2-yl)-N-(4-methylpent-3-en-1-yl)-2-nitrobenzene-sulfonamide (28d)**

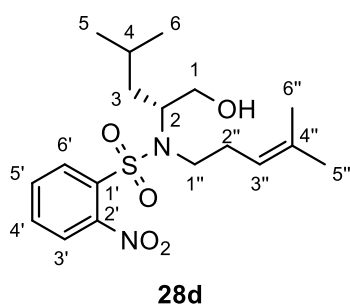

According to GP4 **28d** was prepared from methyl-*N*-(4-methylpent-3-en-1-yl)-*N*-((2-nitrophenyl)sulfonyl)-D-leucinate **27d** (2.02 g, 4.88 mmol) and lithium aluminium hydride (0.20 g, 5.37 mmol) as a yellow oil (1.26 g, 3.25 mmol, 67 %). Purification was accomplished via column chromatography on SiO<sub>2</sub> with hexanes/EtOAc (3 : 1 → 1 : 1).  $[\alpha]_D^{20}$  - 18 ( $c$  1.0 in CHCl<sub>3</sub>).  $R_f$  = 0.60 (hexanes/EtOAc, 1 : 1, anisaldehyde solution). FT-IR (ATR):  $\tilde{\nu}$  = 3552 (w), 2958 (m), 2929 (m), 2873 (w), 1545 (vs), 1467 (w), 1373 (s), 1342 (s), 1201 (w), 1159 (s), 1125 (m), 1063 (w), 949 (w), 852 (w), 777 (w), 745 (w), 653 (w), 591 (m) cm<sup>-1</sup>. <sup>1</sup>H-NMR (500 MHz, CDCl<sub>3</sub>)  $\delta$  0.82 (d,  $J = 6.6$  Hz, 3H, 5-H/6-H), 0.84 (d,  $J = 6.6$  Hz, 3H, 6-H/5-H), 1.30 (ddd,  $J = 14.1$  Hz, 7.1 Hz, 7.1 Hz, 1H, 3-H<sub>a</sub>), 1.37 (ddd,  $J = 14.1$  Hz, 7.1 Hz, 7.1 Hz, 1H, 3-H<sub>b</sub>), 1.53 – 1.62 (m, 1H, 4-H), 1.64 (s, 3H, 5''-H/6''-H), 1.70 (s, 3H, 6''-H/5''-H), 2.27 – 2.38 (m, 1H, 2''-H<sub>a</sub>), 2.39 – 2.50 (m, 1H, 2''-H<sub>b</sub>), 3.22 (t,  $J = 8.3$  Hz, 2H, 1''-H), 3.51 – 3.63 (m, 2H, 1-H), 3.83 – 3.92 (m, 1H, 2-H), 5.03 – 5.12 (m, 1H, 3''-H), 7.55 – 7.63 (m, 1H, 3'-H), 7.63 – 7.74 (m, 2H, 4'-H, 5'-H), 8.04 – 8.18 (m, 1H, 6'-H). <sup>13</sup>C-NMR (126 MHz, CDCl<sub>3</sub>)  $\delta$  17.9 (C-5''/C-6''), 22.5 (C-5, C-6), 24.7 (C-4), 25.7 (C-6''/C-5''), 30.6 (C-8), 39.3 (C-3), 43.9 (C-1''), 58.3 (C-2), 63.3 (C-1), 119.9 (C-3''), 124.1 (C-3'), 131.6 (C-5', C-6'), 133.5 (C-4'), 133.7 (C-1'), 134.9 (C-4''), 148.0 (C-2'). HRMS (ESI): calc (found) for C<sub>18</sub>H<sub>28</sub>N<sub>2</sub>O<sub>5</sub>S ([M+H]<sup>+</sup>): 385.1792 (385.1795).

***N*-((2*S*,3*S*)-1-Hydroxy-3-methylpentan-2-yl)-*N*-(4-methylpent-3-en-1-yl)-2-nitrobenzenesulfonamide (**28e**)**

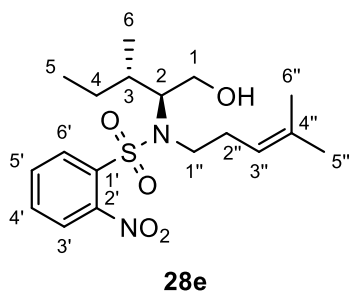

According to GP4 **28e** was prepared from methyl-*N*-(4-methylpent-3-en-1-yl)-*N*-((2-nitrophenyl)sulfonyl)-L-leucinate **27e** (1.96 g, 4.75 mmol) and lithium aluminium hydride (0.20 g, 5.22 mmol) as a yellow oil (0.76 g, 1.97 mmol, 42 %). Purification was accomplished via column chromatography on SiO<sub>2</sub> with hexanes/EtOAc (3 : 1).  $[\alpha]_D^{20} + 42$  (*c* 2.0 in CHCl<sub>3</sub>).

$R_f = 0.23$  (hexanes/EtOAc, 4 : 1, anisaldehyde solution). FT-IR (ATR):  $\tilde{\nu} = 3544$  (w, br), 2966 (m), 2931 (m), 2877 (m), 1591 (w), 1543 (vs), 1457 (m), 1440 (m), 1372 (s), 1340 (s), 1202 (w), 1155 (s), 1125 (s), 1080 (m), 1066 (m), 995 (m), 959 (m), 913 (w), 852 (m), 773 (m), 744 (m), 653 (m), 580 (s), 451 (w) cm<sup>-1</sup>. <sup>1</sup>H-NMR (500 MHz, CDCl<sub>3</sub>)  $\delta$  0.80 (t, *J* = 6.9 Hz, 3H, 5-H), 0.82 – 0.89 (m, 1H, 4-H<sub>a</sub>), 0.91 (d, *J* = 6.6 Hz, 3H, 6-H), 1.46 – 1.63 (m, 2H, 3-H, 4-H<sub>b</sub>), 1.65 (s, 3H, 5''-H/6''-H), 1.70 (s, 3H, 6''-H/5''-H), 1.90 – 2.13 (m, 1H, OH), 2.26 – 2.40 (m, 1H, 2''-H<sub>a</sub>), 2.44 – 2.58 (m, 1H, 2''-H<sub>b</sub>), 3.17 (ddd, *J* = 15.1 Hz, 11.5 Hz, 5.4 Hz, 1H, 1''-H<sub>a</sub>), 3.25 (ddd, *J* = 15.1 Hz, 11.5 Hz, 5.4 Hz, 1H, 1''-H<sub>b</sub>), 3.57 – 3.66 (m, 2H, 1-H<sub>a</sub>, 2-H), 3.81 – 3.88 (m, 1H, 1-H<sub>b</sub>), 5.07 (t, *J* = 7.2 Hz, 1H, 3''-H), 7.53 – 7.56 (m, 1H, 3'-H), 7.64 – 7.69 (m, 2H, 4'-H, 5'-H), 8.05 – 8.09 (m, 1H, 6'-H). <sup>13</sup>C-NMR (126 MHz, CDCl<sub>3</sub>)  $\delta$  11.2 (C-5), 15.9 (C-6), 17.9 (C-5''/C-6''), 25.7 (C-4/(C-6''/C-5'')), 25.8 ((C-5''/C-6'')/C-4), 30.1 (C-2''), 35.6 (C-3), 44.5 (C-1''), 62.1 (C-1), 64.9 (C-2), 120.0 (C-3''), 123.8 (C-3'), 131.3 (C-6'), 131.5 (C-5'), 133.3 (C-4'), 133.9 (C-1'), 134.9 (C-4''), 147.8 (C-2'). HRMS (ESI): calc (found) for C<sub>18</sub>H<sub>28</sub>N<sub>2</sub>O<sub>5</sub>S ([M+Na]<sup>+</sup>): 407.1611 (407.1618).

***(S)*-*N*-(1-Hydroxy-3-phenylpropan-2-yl)-*N*-(4-methylpent-3-en-1-yl)-2-nitrobenzenesulfonamide (**28f**)**

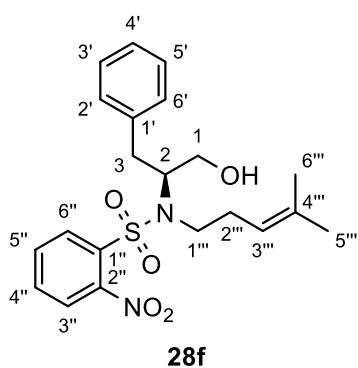

According to GP4 **28f** was prepared from methyl-*N*-(4-methylpent-3-en-1-yl)-*N*-((2-nitrophenyl)sulfonyl)-L-phenylalaninate **27f** (5.37 g, 12.0 mmol) and lithium aluminium hydride (0.50 g, 13.2 mmol) as a yellow oil (2.85 g, 6.80 mmol, 57 %). Purification was accomplished via column chromatography on SiO<sub>2</sub> with hexanes/EtOAc (3 : 1 → 1 : 1).  $[\alpha]_D^{20} + 6$  (*c* 1.0 in CHCl<sub>3</sub>).  $R_f = 0.37$  (hexanes/EtOAc, 2 : 1, anisaldehyde solution). FT-IR (ATR):  $\tilde{\nu} = 3538$  (w), 2923 (w), 1543 (vs), 1496 (w), 1455 (m), 1372 (s), 1339 (s), 1160 (s), 1126 (m), 1034 (m), 983 (m), 939 (m), 853 (m), 743 (m), 701 (m),

653 (w), 579 (m)  $\text{cm}^{-1}$ .  $^1\text{H-NMR}$  (400 MHz,  $\text{CDCl}_3$ )  $\delta$  1.65 (s, 3H, 5'''-H/6'''-H), 1.71 (s, 3H, 6'''-H/5'''-H), 1.94 – 2.16 (s, br, 1H, OH), 2.41 (q,  $J = 7.9$  Hz, 2H, 2'''-H), 2.78 (dd,  $J = 13.6$  Hz, 9.2 Hz, 1H, 3-H<sub>a</sub>), 2.94 (dd,  $J = 13.6$  Hz, 5.6 Hz, 1H, 3-H<sub>b</sub>), 3.26 – 3.47 (m, 2H, 1'''-H), 3.59 – 3.70 (m, 2H, 1-H), 4.05 – 4.16 (m, 1H, 2-H), 5.05 – 5.16 (m, 1H, 3'''-H), 7.05 – 7.12 (m, 2H, 2'-H, 6'-H), 7.12 – 7.23 (m, 3H, 3'-H, 4'-H, 5'-H), 7.53 – 7.68 (m, 3H, 3''-H, 4''-H, 5''-H), 7.91 – 8.01 (m, 1H, 6''-H).  $^{13}\text{C-NMR}$  (101 MHz,  $\text{CDCl}_3$ )  $\delta$  17.9 (C-5'''/C-6'''), 25.7 (C-6'''/C-5'''), 30.4 (C-2'''), 37.2 (C-3), 44.4 (C-1'''), 61.9 (C-2), 62.3 (C-1), 119.9 (C-3'''), 124.2 (C-5'''), 126.8 (C-4'), 128.6 (C-3', C-5'), 129.0 (C-2', C-6'), 131.3 (C-6''), 131.7 (C-3''), 133.5 (C-4''), 133.6 (C-1''), 135.0 (C-4'''), 137.4 (C-1'), 147.9 (C-2''). HRMS (ESI): calc (found) for  $\text{C}_{21}\text{H}_{26}\text{N}_2\text{O}_5\text{S}$  ( $[\text{M}+\text{Na}]^+$ ): 441.1455 (441.1456).

**(R)-N-(1-Hydroxy-3-phenylpropan-2-yl)-N-(4-methylpent-3-en-1-yl)-2-nitrobenzenesulfonamide (28g)**

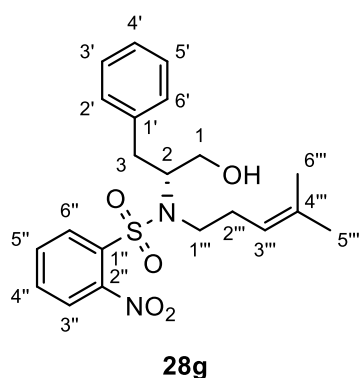

According to GP4 **28g** was prepared from methyl-*N*-(4-methylpent-3-en-1-yl)-*N*-((2-nitrophenyl)sulfonyl)-D-phenylalaninate **27g** (3.03 g, 6.77 mmol) and lithium aluminium hydride (0.28 g, 7.45 mmol) as a yellow oil (2.14 g, 5.11 mmol, 75 %). Purification was accomplished via column chromatography on  $\text{SiO}_2$  with hexanes/EtOAc (2 : 1  $\rightarrow$  1 : 1).  $[\alpha]_{\text{D}}^{20}$  - 7 ( $c$  1.0 in  $\text{CHCl}_3$ ).  $R_f$  = 0.37 (hexanes/EtOAc, 2 : 1, anisaldehyde solution). FT-IR (ATR):  $\tilde{\nu}$  = 3557 (w), 2923 (w), 1543 (vs), 1496 (w), 1454 (m), 1372 (s), 1340 (s), 1160 (s), 1125 (m), 1033 (w), 982 (w), 939 (w), 853 (w), 742 (m), 701 (m), 653 (w), 578 (m)  $\text{cm}^{-1}$ .  $^1\text{H-NMR}$  (500 MHz,  $\text{CDCl}_3$ )  $\delta$  1.65 (s, 3H, 5'''-H/6'''-H), 1.72 (s, 3H, 6'''-H/5'''-H), 2.42 (q,  $J = 7.9$  Hz, 2H, 2'''-H), 2.78 (dd,  $J = 13.6$  Hz, 9.2 Hz, 1H, 3-H<sub>a</sub>), 2.95 (dd,  $J = 13.6$  Hz, 5.6 Hz, 1H, 3-H<sub>b</sub>), 3.29 – 3.44 (m, 2H, 1'''-H), 3.60 – 3.70 (m, 2H, 1-H), 4.05 – 4.15 (m, 1H, 2-H), 5.07 – 5.15 (m, 1H, 3'''-H), 7.07 – 7.12 (m, 2H, 2'-H, 6'-H), 7.12 – 7.23 (m, 3H, 3'-H, 4'-H, 5'-H), 7.55 – 7.69 (m, 3H, 3''-H, 4''-H, 5''-H), 7.96 – 8.02 (m, 1H, 6''-H).  $^{13}\text{C-NMR}$  (126 MHz,  $\text{CDCl}_3$ )  $\delta$  18.0 (C-5'''/C-6'''), 25.7 (C-6'''/C-5'''), 30.4 (C-2'''), 37.2 (C-3), 44.3 (C-1'''), 61.9 (C-2), 62.2 (C-1), 119.9 (C-3'''), 124.3 (C-5'''), 126.8 (C-4'), 128.6 (C-3', C-5'), 129.0 (C-2', C-6'), 131.4 (C-6''), 131.7 (C-3''), 133.5 (C-4''), 133.7 (C-1''), 135.1 (C-4'''), 137.4 (C-1'), 148.0 (C-2''). HRMS (ESI): calc (found) for  $\text{C}_{21}\text{H}_{26}\text{N}_2\text{O}_5\text{S}$  ( $[\text{M}+\text{Na}]^+$ ): 441.1455 (441.1458).

### GP5: Oxidation with Dess-Martin-Periodinane (DMP)

The aldehydes or ketones were prepared according to the literature.<sup>[6]</sup> A round bottom flask was charged with a solution of the primary or secondary alcohol (3.00 mmol) in dichloromethane (50 mL). DMP (3.18 g, 7.50 mmol) was added at room temperature and the mixture was stirred for 40 min at room temperature. Diethyl ether (130 mL) and a mixture (25 mL, 1 : 1) of saturated solutions of sodium thiosulfate and sodium bicarbonate were added and stirring continued for 15 min at room temperature until a clear solution was obtained. The phases were separated and the aqueous phase was extracted with diethyl ether (1 × 45 mL). The organic phases were washed with saturated sodium bicarbonate solution, water and brine (each 2 × 45 mL) and dried over magnesium sulfate. The solvents were evaporated and the crude product was purified by column chromatography. The products were isolated as oils.

#### (*S*)-*N*-(3-Methyl-1-oxobutan-2-yl)-*N*-(4-methylpent-3-en-1-yl)-2-nitrobenzenesulfonamide (**29a**)

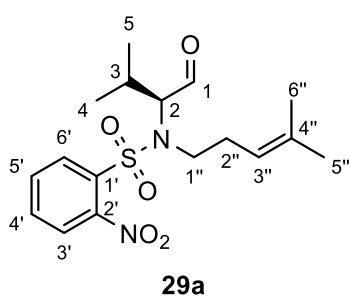

According to GP5 **29a** was prepared from (*S*)-*N*-(1-Hydroxy-3-methylbutan-2-yl)-*N*-(4-methylpent-3-en-1-yl)-2-nitrobenzenesulfonamide **28a** (0.62 g, 1.68 mmol) and DMP (1.78 g, 4.20 mmol) as a yellow oil (0.41 g, 1.10 mmol, 65 %). Purification was accomplished via column chromatography on SiO<sub>2</sub> with hexanes/EtOAc (3 : 1).  $[\alpha]_D^{20} + 37$  (*c* 1.0 in CHCl<sub>3</sub>).

$R_f = 0.73$  (hexanes/EtOAc, 2 : 1, anisaldehyde solution). FT-IR (ATR):  $\tilde{\nu} = 3095$  (w), 2968 (m), 2932 (w), 2877 (w), 2729 (w), 1732 (m), 1590 (w), 1544 (vs), 1470 (w), 1440 (w), 1372 (s), 1348 (s), 1297 (w), 1249 (w), 1203 (w), 1162 (s), 1126 (m), 1104 (w), 1070 (w), 1002 (w), 975 (w), 960 (w), 852 (m), 778 (m), 745 (m), 676 (w), 653 (w), 588 (m) cm<sup>-1</sup>. <sup>1</sup>H-NMR (400 MHz, CDCl<sub>3</sub>)  $\delta$  0.97 (d,  $J = 6.6$  Hz, 3H, 4-H/5-H), 1.16 (d,  $J = 6.6$  Hz, 3H, 5-H/4-H), 1.60 (s, 3H, 5''-H/6''-H), 1.67 (s, 3H, 6''-H/5''-H), 2.12 – 2.31 (m, 2H, 3-H, 2''-H<sub>a</sub>), 2.31 – 2.44 (m, 1H, 2''-H<sub>b</sub>), 3.16 (ddd,  $J = 15.2$  Hz, 11.2 Hz, 5.4 Hz, 1H, 1''-H<sub>a</sub>), 3.27 (ddd,  $J = 15.2$  Hz, 11.2 Hz, 5.7 Hz, 1H, 1''-H<sub>b</sub>), 4.20 (d,  $J = 10.1$  Hz, 1H, 2-H), 4.98 (t,  $J = 7.0$  Hz, 1H, 3''-H), 7.57 – 7.63 (m, 1H, 3'-H), 7.66 – 7.74 (m, 2H, 4'-H, 5'-H), 8.06 – 8.12 (m, 1H, 6'-H), 9.73 (s, 1H, 1-H). <sup>13</sup>C-NMR (176 MHz, CDCl<sub>3</sub>)  $\delta$  17.8 (C-5''/C-6''), 20.1 (C-4/C-5), 20.2 (C-5/C-4), 25.7 (C-6''/C-5''), 27.3 (C-3), 29.6 (C-2''), 46.7 (C-1''), 71.5 (C-2), 119.3 (C-3''), 124.2 (C-3'), 131.1 (C-6'), 131.7 (C-5'), 133.5 (C-1'), 133.6 (C-4'), 135.2 (C-4''), 147.9 (C-2'), 199.0 (C-1). HRMS (ESI): calc (found) for C<sub>17</sub>H<sub>24</sub>N<sub>2</sub>O<sub>5</sub>S ([M+H]<sup>+</sup>): 369.1479 (369.1479). The spectral data are in accordance with previous reported literature.<sup>[6]</sup>

**(*R*)-*N*-(3-Methyl-1-oxobutan-2-yl)-*N*-(4-methylpent-3-en-1-yl)-2-nitrobenzenesulfonamide (**29b**)**

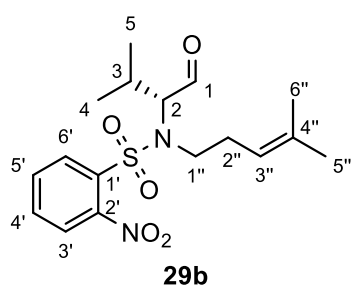

According to GP5 **29b** was prepared from (*R*)-*N*-(1-hydroxy-3-methylbutan-2-yl)-*N*-(4-methylpent-3-en-1-yl)-2-nitrobenzenesulfonamide **28b** (0.55 g, 1.48 mmol) and DMP (1.57 g, 3.70 mmol) as a yellow oil (0.41 g, 1.12 mmol, 76 %). Purification was accomplished via column chromatography on SiO<sub>2</sub> with hexanes/EtOAc (2 : 1).  $[\alpha]_D^{20}$  - 36 (*c* 1.0 in CHCl<sub>3</sub>).

$R_f$  = 0.48 (hexanes/EtOAc, 2 : 1, anisaldehyde solution). FT-IR (ATR):  $\tilde{\nu}$  = 3560 (w), 3092 (w), 2969 (m), 2929 (w), 2880 (w), 2858 (w), 1733 (m), 1591 (w), 1544 (vs), 1470 (w), 1440 (w), 1373 (s), 1346 (m), 1161 (s), 1126 (m), 1072 (w), 976 (w), 914 (w), 852 (w), 776 (w), 752 (m), 672 (w), 653 (w), 580 (m), 563 (w) cm<sup>-1</sup>. <sup>1</sup>H-NMR (700 MHz, CDCl<sub>3</sub>)  $\delta$  0.96 (d, *J* = 6.6 Hz, 3H, 4-H/5-H), 1.15 (d, *J* = 6.6 Hz, 3H, 5-H/4-H), 1.59 (s, 3H, 5''-H/6''-H), 1.66 (s, 3H, 6''-H/5''-H), 2.18 (dq, *J* = 10.1 Hz, 6.6 Hz, 6.6 Hz, 1H, 3-H), 2.20 – 2.29 (m, 1H, 2''-H<sub>a</sub>), 2.32 – 2.43 (m, 1H, 2''-H<sub>b</sub>), 3.16 (ddd, *J* = 15.2 Hz, 11.6 Hz, 5.4 Hz, 1H, 1''-H<sub>a</sub>), 3.26 (ddd, *J* = 15.2 Hz, 11.6 Hz, 5.4 Hz, 1H, 1''-H<sub>b</sub>), 4.20 (d, *J* = 10.1 Hz, 1H, 2-H), 4.97 (t, *J* = 7.3 Hz, 1H, 3''-H), 7.58 – 7.63 (m, 1H, 6'-H), 7.67 – 7.73 (m, 2H, 4'-H, 5'-H), 8.06 – 8.11 (m, 1H, 3'-H), 9.73 (s, 1H, 1-H). <sup>13</sup>C-NMR (176 MHz, CDCl<sub>3</sub>)  $\delta$  17.8 (C-5''/C-6''), 20.1 (C-4/C-5), 20.2 (C-5/C-4), 25.7 (C-6''/C-5''), 27.3 (C-3), 29.6 (C-2''), 46.7 (C-1''), 71.5 (C-2), 119.4 (C-3''), 124.2 (C-6'), 131.1 (C-3'), 131.7 (C-4'/C-5'), 133.5 (C-1'), 133.7 (C-5'/C-4'), 135.2 (C-4''), 147.9 (C-2'), 199.0 (C-1). HRMS (ESI): calc (found) for C<sub>17</sub>H<sub>24</sub>N<sub>2</sub>O<sub>5</sub>S ([M+Na]<sup>+</sup>): 391.1298 (391.1299).

**(*S*)-*N*-(4-Methyl-1-oxopentan-2-yl)-*N*-(4-methylpent-3-en-1-yl)-2-nitrobenzenesulfonamide (**29c**)**

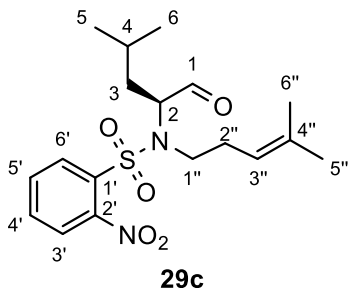

According to GP5 **29c** was prepared from (*S*)-*N*-(1-hydroxy-4-methylpentan-2-yl)-*N*-(4-methylpent-3-en-1-yl)-2-nitrobenzenesulfonamide **28c** (0.18 g, 0.48 mmol) and DMP (0.41 g, 0.96 mmol) as a yellow oil (0.12 g, 0.32 mmol, 67 %). Purification was accomplished via column chromatography on SiO<sub>2</sub> with hexanes/EtOAc (2 : 1).  $[\alpha]_D^{20}$  + 30 (*c* 1.0 in CHCl<sub>3</sub>).

$R_f$  = 0.63 (hexanes/EtOAc, 2 : 1, anisaldehyde solution). FT-IR (ATR):  $\tilde{\nu}$  = 2960 (m), 1736 (m), 1545 (vs), 1440 (w), 1372 (s), 1161 (s), 1126 (m), 1069 (w), 948 (w), 852 (w), 777 (m), 746 (m), 653 (w), 588 (m), 573 (m) cm<sup>-1</sup>. <sup>1</sup>H-NMR (500 MHz, CDCl<sub>3</sub>)  $\delta$  0.90 (d, *J* = 5.8 Hz,

3H, 5-H/6-H), 0.95 (d,  $J = 5.8$  Hz, 3H, 6-H/5-H), 1.47 – 1.56 (m, 1H, 3-H<sub>a</sub>), 1.61 (s, 3H, 5''-H/6''-H), 1.67 (s, 3H, 6''-H/5''-H), 1.72 – 1.82 (m, 2H, 3-H<sub>b</sub>, 4-H), 2.14 – 2.24 (m, 1H, 2''-H<sub>a</sub>), 2.35 – 2.45 (m, 1H, 2''-H<sub>b</sub>), 3.09 – 3.18 (m, 1H, 1''-H<sub>a</sub>), 3.25 – 3.34 (m, 1H, 1''-H<sub>b</sub>), 4.53 (dd,  $J = 10.0$  Hz, 4.0 Hz, 1H, 2-H), 4.98 – 5.04 (m, 1H, 3''-H), 7.60 – 7.64 (m, 1H, 3'-H), 7.68 – 7.75 (m, 2H, 4'-H, 5'-H), 8.06 – 8.12 (m, 1H, 6'-H), 9.56 (s, 1H, 1-H). <sup>13</sup>C-NMR (126 MHz, CDCl<sub>3</sub>)  $\delta$  17.9 (C-5/C-6), 21.3 (C-5''/C-6''), 23.1 (C-6''/C-5''), 24.3 (C-4), 25.7 (C-6/C-5), 29.8 (C-2''), 35.7 (C-3), 46.3 (C-1), 64.7 (C-2), 119.3 (C-3''), 124.3 (C-3'), 131.2 (C-6'), 131.7 (C-5'), 133.1 (C-1'), 133.7 (C-4'), 135.3 (C-4''), 148.1 (C-2'), 199.9 (C-1). HRMS (ESI): calc (found) for C<sub>18</sub>H<sub>26</sub>N<sub>2</sub>O<sub>5</sub>S ([M+Na]<sup>+</sup>): 405.1455 (405.1455).

**(R)-N-(4-Methyl-1-oxopent-2-yl)-N-(4-methylpent-3-en-1-yl)-2-nitrobenzene-sulfonamide (29d)**

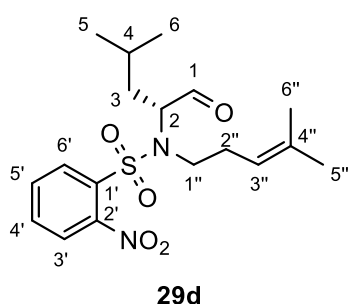

According to GP5 **29d** was prepared from (*R*)-N-(1-hydroxy-4-methylpentan-2-yl)-N-(4-methylpent-3-en-1-yl)-2-nitrobenzene-sulfonamide **28d** (1.01 g, 2.64 mmol) and DMP (2.24 g, 5.28 mmol) as a yellow oil (0.79 g, 2.07 mmol, 78 %). Purification was accomplished via column chromatography on SiO<sub>2</sub> with hexanes/EtOAc (2 : 1).  $[\alpha]_D^{20} - 15$  ( $c$  1.0 in CHCl<sub>3</sub>).

$R_f = 0.62$  (hexanes/EtOAc, 2 : 1, anisaldehyde solution). FT-IR (ATR):  $\tilde{\nu} = 2958$  (m), 2871 (w), 1735 (m), 1675 (w), 1589 (w), 1545 (vs), 1467 (m), 1440 (w), 1372 (s), 1347 (s), 1161 (vs), 1126 (m), 1069 (m), 949 (m), 852 (m), 776 (m), 746 (m), 653 (w), 587 (m), 575 (m) cm<sup>-1</sup>. <sup>1</sup>H-NMR (500 MHz, CDCl<sub>3</sub>)  $\delta$  0.90 (d,  $J = 5.8$  Hz, 3H, 5-H/6-H), 0.95 (d,  $J = 5.8$  Hz, 3H, 6-H/5-H), 1.47 – 1.56 (m, 1H, 3-H<sub>a</sub>), 1.61 (s, 3H, 5''-H/6''-H), 1.68 (s, 3H, 6''-H/5''-H), 1.72 – 1.82 (m, 2H, 3-H<sub>b</sub>, 4-H), 2.14 – 2.23 (m, 1H, 2''-H<sub>a</sub>), 2.35 – 2.45 (m, 1H, 2''-H<sub>b</sub>), 3.13 (ddd,  $J = 15.1$  Hz, 11.0 Hz, 5.7 Hz, 1H, 1''-H<sub>a</sub>), 3.29 (ddd,  $J = 15.1$  Hz, 11.0 Hz, 5.1 Hz, 1H, 1''-H<sub>b</sub>), 4.53 (dd,  $J = 10.0$  Hz, 4.0 Hz, 1H, 2-H), 4.97 – 5.04 (m, 1H, 3''-H), 7.58 – 7.64 (m, 1H, 3'-H), 7.67 – 7.75 (m, 2H, 4'-H, 5'-H), 8.06 – 8.12 (m, 1H, 6'-H), 9.56 (s, 1H, 1-H). <sup>13</sup>C-NMR (126 MHz, CDCl<sub>3</sub>)  $\delta$  17.9 (C-5/C-6), 21.3 (C-5''/C-6''), 23.0 (C-6''/C-5''), 24.3 (C-4), 25.7 (C-6/C-5), 29.8 (C-2), 35.7 (C-3), 46.3 (C-1), 64.7 (C-2), 119.3 (C-3''), 124.3 (C-3'), 131.2 (C-6'), 131.7 (C-5'), 133.1 (C-1'), 133.7 (C-4'), 135.3 (C-4''), 148.1 (C-2'), 199.9 (C-1). HRMS (ESI): calc (found) for C<sub>18</sub>H<sub>26</sub>N<sub>2</sub>O<sub>5</sub>S ([M+Na]<sup>+</sup>): 405.1455 (405.1461).

***N*-((2*S*,3*S*)-3-Methyl-1-oxopentan-2-yl)-*N*-(4-methylpent-3-en-1-yl)-2-nitrobenzenesulfonamide (**29e**)**

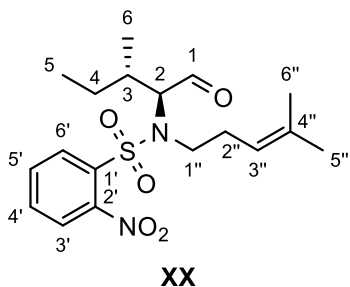

According to GP5 **29e** was prepared from *N*-((2*S*,3*S*)-1-hydroxy-3-methylpentan-2-yl)-*N*-(4-methylpent-3-en-1-yl)-2-nitrobenzenesulfonamide **28e** (0.76 g, 1.98 mmol) and DMP (2.10 g, 4.95 mmol) as a yellow oil (0.72 g, 1.88 mmol, 95 %). Purification was accomplished via column chromatography on SiO<sub>2</sub> with hexanes/EtOAc (5 : 1 → 4 : 1 → 3 : 1).  $[\alpha]_D^{20} + 23$

(*c* 2.6 in CHCl<sub>3</sub>). *R*<sub>f</sub> = 0.40 (hexanes/EtOAc, 4 : 1, anisaldehyde solution). FT-IR (ATR):  $\tilde{\nu}$  = 2966 (m), 2928 (m), 2878 (w), 1731 (m), 1673 (w), 1590 (w), 1545 (vs), 1462 (m), 1440 (w), 1373 (s), 1349 (s), 1203 (w), 1161 (s), 1126 (m), 1069 (w), 1007 (w), 962 (w), 852 (w), 777 (m), 746 (m), 691 (w), 653 (w), 586 (m), 456 (w) cm<sup>-1</sup>. <sup>1</sup>H-NMR (500 MHz, CDCl<sub>3</sub>)  $\delta$  0.91 (t, *J* = 7.4 Hz, 3H, 5-H), 1.09 – 1.16 (m, 1H, 4-H<sub>a</sub>), 1.13 (d, *J* = 6.7 Hz, 3H, 6-H), 1.62 (s, 3H, 5''-H/6''-H), 1.64 – 1.70 (m, 1H, 4-H<sub>b</sub>), 1.68 (s, 3H, 6''-H/5''-H), 1.85 – 1.97 (m, 1H, 3-H), 2.16 – 2.26 (m, 1H, 2''-H<sub>a</sub>), 2.38 – 2.50 (m, 1H, 2''-H<sub>b</sub>), 3.17 (ddd, *J* = 15.1 Hz, 11.5 Hz, 5.7 Hz, 1H, 1''-H<sub>a</sub>), 3.28 (ddd, *J* = 15.1 Hz, 11.5 Hz, 5.7 Hz, 1H, 1''-H<sub>b</sub>), 4.30 (d, *J* = 9.8 Hz, 1H, 2-H), 4.96 – 5.03 (m, 1H, 3''-H), 7.54 – 7.64 (m, 1H, 3'-H), 7.65 – 7.75 (m, 2H, 4'-H, 5'-H), 8.01 – 8.12 (m, 1H, 6'-H), 9.72 (s, 1H, 1-H). <sup>13</sup>C-NMR (126 MHz, CDCl<sub>3</sub>)  $\delta$  10.7 (C-5), 16.1 (C-6), 17.9 (C-5''/C-6''), 25.7 (C-6''/C-5''), 26.0 (C-4), 29.8 (C-2''), 34.0 (C-3), 46.9 (C-1''), 70.6 (C-2), 119.4 (C-3'''), 124.2 (C-3'), 131.1 (C-6'), 131.7 (C-1'), 133.2 (C-5'), 133.7 (C-4'), 135.2 (C-4''), 147.9 (C-2'), 199.2 (C-1). HRMS (ESI): calc (found) for C<sub>18</sub>H<sub>26</sub>N<sub>2</sub>O<sub>5</sub>S ([M+Na]<sup>+</sup>): 405.1455 (405.1448).

***(S)*-*N*-(4-Methylpent-3-en-1-yl)-2-nitro-*N*-(1-oxo-3-phenylpropan-2-yl)benzenesulfonamide (**29f**)**

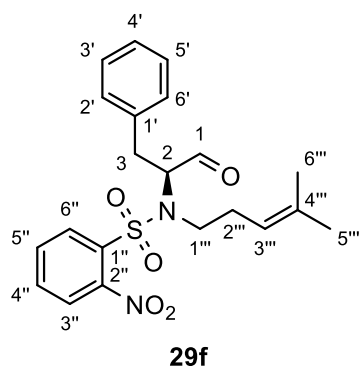

According to GP5 **29f** was prepared from (*S*)-*N*-(1-hydroxy-3-phenylpropan-2-yl)-*N*-(4-methylpent-3-en-1-yl)-2-nitrobenzenesulfonamide **28f** (0.45 g, 1.08 mmol) and DMP (1.15 g, 2.70 mmol) as a yellow oil (0.44 g, 1.07 mmol, 99 %). Purification was accomplished via column chromatography on SiO<sub>2</sub> with hexanes/EtOAc (4 : 1 → 2 : 1).  $[\alpha]_D^{20} - 20$  (*c* 3.9 in CHCl<sub>3</sub>). *R*<sub>f</sub> = 0.44 (hexanes/EtOAc, 3 : 1, anisaldehyde

solution). FT-IR (ATR):  $\tilde{\nu}$  = 3029 (w), 2915 (w), 1735 (m), 1590 (w), 1542 (vs), 1498 (w), 1454 (w), 1439 (w), 1371 (s), 1346 (s), 1254 (w), 1204 (w), 1162 (s), 1126 (m), 1096 (w), 1076

(w), 1031 (w), 961 (m), 912 (w), 852 (m), 740 (s), 700 (m), 653 (w), 576 (m), 541 (w), 494 (w)  $\text{cm}^{-1}$ .  $^1\text{H-NMR}$  (500 MHz,  $\text{CDCl}_3$ )  $\delta$  1.60 (s, 3H, 5'''-H/6'''-H), 1.68 (s, 3H, 6'''-H/5'''-H), 2.19 – 2.30 (m, 2H, 2'''-H), 2.89 (dd,  $J = 14.4$  Hz, 8.4 Hz, 1H, 3-H<sub>a</sub>), 3.26 – 3.35 (m, 1H, 1'''-H<sub>a</sub>), 3.35 – 3.45 (m, 2H, 1'''-H<sub>b</sub>, 3-H<sub>b</sub>), 4.73 (dd,  $J = 8.4$  Hz, 6.4 Hz, 1H, 2-H), 4.99 – 5.05 (m, 1H, 3'''-H), 7.10 – 7.20 (m, 5H, 2'-H, 3'-H, 4'-H, 5'-H, 6'-H), 7.51 – 7.60 (m, 2H, 3''-H, 5''-H), 7.62 – 7.68 (m, 1H, 4''-H), 7.78 – 7.84 (m, 1H, 6''-H), 9.70 (s, 1H, 1-H).  $^{13}\text{C-NMR}$  (126 MHz,  $\text{CDCl}_3$ )  $\delta$  17.9 (C-5'''/C-6'''), 25.7 (C-6'''/C-5'''), 29.3 (C-2'''), 33.0 (C-3), 46.0 (C-1'''), 67.1 (C-2), 119.1 (C-3'''), 124.4 (C-3''), 126.9 (C-4'), 128.6 (C-3', C-5'), 129.0 (C-2', C-6'), 130.9 (C-6''), 131.8 (C-5''), 133.3 (C-1''), 133.6 (C-4'''), 135.6 (C-4''), 136.2 (C-1'), 147.8 (C-2''), 199.3 (C-1). HRMS (ESI): calc (found) for  $\text{C}_{21}\text{H}_{24}\text{N}_2\text{O}_5\text{S}$  ( $[\text{M}+\text{H}]^+$ ): 417.1479 (417.1480).

**(*R*)-*N*-(4-Methylpent-3-en-1-yl)-2-nitro-*N*-(1-oxo-3-phenylpropan-2-yl)benzene-sulfonamide (**29g**)**

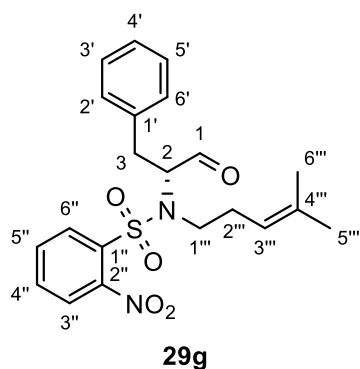

According to GP5 **29g** was prepared from (*R*)-*N*-(1-hydroxy-3-phenylpropan-2-yl)-*N*-(4-methylpent-3-en-1-yl)-2-nitrobenzene-sulfonamide **28g** (1.34 g, 3.20 mmol) and DMP (2.71 g, 6.40 mmol) as a yellow oil (1.03 g, 2.46 mmol, 77 %). Purification was accomplished via column chromatography on  $\text{SiO}_2$  with hexanes/EtOAc (4 : 1  $\rightarrow$  2 : 1).  $[\alpha]_{\text{D}}^{20} + 35$  (c 1.0 in  $\text{CHCl}_3$ ).  $R_f = 0.42$  (hexanes/EtOAc, 3 : 1, anisaldehyde solution).

FT-IR (ATR):  $\tilde{\nu} = 3066$  (w), 3029 (w), 2926 (w), 1736 (m), 1673 (w), 1590 (w), 1542 (vs), 1497 (w), 1455 (m), 1440 (m), 1371 (s), 1345 (s), 1203 (w), 1161 (vs), 1126 (s), 1094 (m), 1030 (w), 959 (m), 852 (m), 741 (s), 700 (m), 653 (w), 579 (m)  $\text{cm}^{-1}$ .  $^1\text{H-NMR}$  (500 MHz,  $\text{CDCl}_3$ )  $\delta$  1.60 (s, 3H, 5'''-H/6'''-H), 1.68 (s, 3H, 6'''-H/5'''-H), 2.19 – 2.29 (m, 2H, 2'''-H), 2.88 (dd,  $J = 14.4$  Hz, 8.4 Hz, 1H, 3-H<sub>a</sub>), 3.26 – 3.35 (ddd,  $J = 14.4$  Hz, 8.6 Hz, 7.1 Hz, 1H, 1'''-H<sub>a</sub>), 3.35 – 3.45 (m, 2H, 1'''-H<sub>b</sub>, 3-H<sub>b</sub>), 4.73 (dd,  $J = 8.4$  Hz, 6.4 Hz, 1H, 2-H), 4.98 – 5.07 (m, 1H, 3'''-H), 7.10 – 7.20 (m, 5H, 2'-H, 3'-H, 4'-H, 5'-H, 6'-H), 7.52 – 7.60 (m, 2H, 3''-H, 5''-H), 7.62 – 7.68 (m, 1H, 4''-H), 7.78 – 7.83 (m, 1H, 6''-H), 9.70 (s, 1H, 1-H).  $^{13}\text{C-NMR}$  (126 MHz,  $\text{CDCl}_3$ )  $\delta$  17.9 (C-5'''/C-6'''), 25.7 (C-6'''/C-5'''), 29.3 (C-2'''), 33.1 (C-3), 46.0 (C-1'''), 67.1 (C-2), 119.1 (C-3'''), 124.4 (C-3''), 127.0 (C-4'), 128.6 (C-3', C-5'), 129.0 (C-2', C-6'), 131.0 (C-6''), 131.8 (C-5''), 133.3 (C-1''), 133.6 (C-4'''), 135.6 (C-4''), 136.2 (C-1'), 148.6 (C-2''), 199.4 (C-1). HRMS (ESI): calc (found) for  $\text{C}_{21}\text{H}_{24}\text{N}_2\text{O}_5\text{S}$  ( $[\text{M}+\text{H}]^+$ ): 417.1479 (417.1481).

## GP6: Cyclisation of amino aldehydes

### *Method A: Using Iron(III)chloride*

The reaction was performed according to the literature.<sup>[11]</sup> A round bottom flask was charged with a solution of the amino aldehyde (1.50 mmol) in dichloromethane (50 mL) under nitrogen atmosphere. Upon cooling to 0 °C a solution of iron(III)chloride (3.0 mL, 3.00 mmol, 1 M in diethyl ether) was added dropwise. The mixture was stirred for 24 h at room temperature. Afterwards sodium hydroxide solution (50 mL, 2 M in water) was added and stirring continued for 5 min. The phases were separated and the aqueous phase was extracted with dichloromethane (3 × 75 mL). The organic phases were dried over magnesium sulfate and the solvents were evaporated. The crude product was purified by column chromatography or HPLC.

### *Method B: Using SmI<sub>2</sub>*

The reaction was performed according to the literature.<sup>[12]</sup> A round bottom flask was charged with a solution of the amino aldehyde (1.92 mmol) in dichloromethane (25 mL) under nitrogen atmosphere. A solution of samarium diiodide (21 mL, 2.10 mmol, 0.1 M in tetrahydrofuran) was added dropwise at room temperature and stirred for 24 h at room temperature. The solvents were evaporated and the crude product was purified by column chromatography.

### *Method C: Using MeAlCl<sub>2</sub>*

The reaction was performed according to the literature.<sup>[13]</sup> A round bottom flask was charged with a solution of the amino aldehyde (1.96 mmol) in chloroform (75 mL) under nitrogen atmosphere. A solution of methyl aluminium dichloride (2.0 mL, 2.00 mmol, 1.0 M in hexane) was added dropwise and the reaction was stirred for 24 h at reflux temperature. After cooling to room temperature the reaction was quenched with water (25 mL) and extracted with dichloromethane (2 × 40 mL). The organic phases were washed with brine (20 mL), dried over magnesium sulfate and the solvents were evaporated. The crude product was purified by column chromatography.

**(2*S*,3*R*,4*S*)-2-Isopropyl-1-((2-nitrophenyl)sulfonyl)-4-(prop-1-en-2-yl)piperidin-3-ol ((*R*,*S*)-30a) and (2*S*,3*R*,4*R*)-4-(2-Hydroxypropan-2-yl)-2-isopropyl-1-((2-nitrophenyl)sulfonyl)-piperidin-3-ol ((*R*,*R*)-31a)**

According to GP6A (*R*,*S*)-**30a** was prepared from (*S*)-*N*-(3-methyl-1-oxobutan-2-yl)-*N*-(4-methylpent-3-en-1-yl)-2-nitrobenzenesulfonamide **29a** (0.72 g, 1.95 mmol) and iron(III)-chloride solution (3.9 mL, 3.90 mmol, 1 M in Et<sub>2</sub>O) as a colorless solid (0.47 g, 1.28 mmol, 66 %). Diol (*R*,*R*)-**31a** was isolated as well as a colorless solid (0.18 g, 0.46 mmol, 24 %).

Purification was accomplished via column chromatography on SiO<sub>2</sub> with hexanes/EtOAc (2 : 1 → 1 : 1 → 1 : 2).

Alkene (*R,S*)-**30a** was also prepared according to GP6B from (*S*)-*N*-(3-methyl-1-oxobutan-2-yl)-*N*-(4-methylpent-3-en-1-yl)-2-nitrobenzenesulfonamide **29a** (0.71 g, 1.92 mmol) and samarium diiodide solution (21.0 mL, 2.10 mmol, 1 M in THF) as a colorless solid (0.32 g, 0.87 mmol, 45 %). Purification was accomplished via column chromatography on SiO<sub>2</sub> with hexanes/EtOAc (3 : 1).

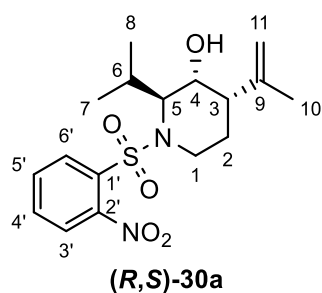

(*R,S*)-**30a**, mp 138 °C.  $[\alpha]_D^{20} + 112$  (*c* 1.0 in CHCl<sub>3</sub>). *R<sub>f</sub>* = 0.75 (hexanes/EtOAc, 1 : 2, anisaldehyde solution). FT-IR (ATR):  $\tilde{\nu}$  = 3547 (w), 3088 (w), 2966 (m), 2932 (w), 2877 (w), 1736 (w), 1646 (w), 1590 (w), 1542 (vs), 1470 (w), 1440 (w), 1373 (s), 1339 (s), 1280 (w), 1207 (w), 1158 (s), 1126 (m), 1096 (w), 1065 (m), 1046 (w), 976 (m), 914 (m), 853 (w), 824 (w), 777 (w), 752 (s), 735 (m), 670 (w), 651 (w), 623 (w), 580 (s), 562 (m) cm<sup>-1</sup>. <sup>1</sup>H-NMR (500 MHz, CDCl<sub>3</sub>)  $\delta$  0.86 (d, *J* = 6.7 Hz, 3H, 7-H/8-H), 1.03 (d, *J* = 6.7 Hz, 3H, 8-H/7-H), 1.38 – 1.45 (m, 1H, 2-H<sub>a</sub>), 1.77 (s, 3H, 10-H), 1.84 (dddd, *J* = 13.1 Hz, 13.1 Hz, 13.1 Hz, 4.7 Hz, 1H, 2-H<sub>b</sub>), 1.98 (s, br, 1H, OH), 2.00 – 2.11 (m, 1H, 6-H), 2.26 (d, *J* = 12.7 Hz, 1H, 3-H), 3.10 (dt, *J* = 13.9 Hz, 2.6 Hz, 1H, 1-H<sub>a</sub>), 3.69 (d, *J* = 10.7 Hz, 1H, 5-H), 4.02 – 4.12 (m, 2H, 1-H<sub>b</sub>, 4-H), 4.68 (s, 1H, 11-H<sub>a</sub>), 4.90 – 4.97 (m, 1H, 11-H<sub>b</sub>), 7.50 – 7.56 (m, 1H, 3'-H), 7.58 – 7.67 (m, 2H, 4'-H, 5'-H), 8.10 – 8.17 (m, 1H, 6'-H). <sup>13</sup>C-NMR (126 MHz, CDCl<sub>3</sub>)  $\delta$  19.9 (C-7/C-8), 20.4 (C-8/C-7), 22.0 (C-10), 22.6 (C-2), 26.5 (C-6), 41.4 (C-1), 41.6 (C-3), 65.2 (C-4), 66.0 (C-5), 112.2 (C-11), 123.5 (C-3'), 131.2 (C-6'), 131.3 (C-5'), 133.1 (C-4'), 134.8 (C-1'), 145.1 (C-9), 148.0 (C-2'). HRMS (ESI): calc (found) for C<sub>17</sub>H<sub>24</sub>N<sub>2</sub>O<sub>5</sub>S ([M+Na]<sup>+</sup>): 391.1298 (391.1306); calc (found) for C<sub>17</sub>H<sub>24</sub>N<sub>2</sub>O<sub>5</sub>S ([M+H]<sup>+</sup>): 369.1479 (369.1476).

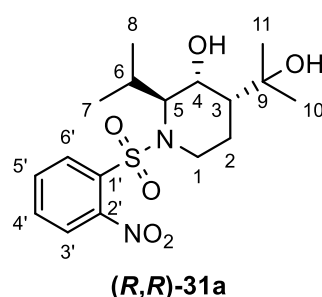

(*R,R*)-**31a**, mp 185 °C.  $[\alpha]_D^{20} + 148$  (*c* 1.0 in CHCl<sub>3</sub>). *R<sub>f</sub>* = 0.44 (hexanes/EtOAc, 1 : 2, anisaldehyde solution). FT-IR (ATR):  $\tilde{\nu}$  = 3362 (w, br), 2969 (m), 1543 (vs), 1470 (m), 1440 (w), 1371 (s), 1340 (s), 1278 (m), 1216 (w), 1157 (vs), 1125 (s), 1092 (m), 1064 (m), 1048 (m), 988 (w), 970 (s), 911 (m), 853 (m), 806 (w), 751 (s), 733 (s), 686 (w), 653 (m), 637 (w), 580 (s), 562 (m) cm<sup>-1</sup>. <sup>1</sup>H-NMR (500 MHz, CDCl<sub>3</sub>)  $\delta$  0.77 (d, *J* = 6.7 Hz, 3H, 1-H), 0.98 (d, *J* = 6.7 Hz, 3H, 2-H), 1.17 (s, 3H, 10-H/11-H), 1.32 (s, 3H, 11-H/10-H), 1.43 – 1.49 (m, 1H, 3-H), 1.53 – 1.60 (m, 1H, 2-H<sub>a</sub>), 1.84 – 2.00 (m, 2H, 2-H<sub>b</sub>, 6-H), 3.06 (s, br, 2H, 2 × OH), 3.11 (dt, *J* = 3.0 Hz,

14.1 Hz, 1H, 1-H<sub>a</sub>), 3.52 (d,  $J = 10.7$  Hz, 1H, 5-H), 4.09 – 4.17 (m, 1H, 1-H<sub>b</sub>), 4.36 – 4.43 (m, 1H, 4-H), 7.53 – 7.58 (m, 1H, 3'-H), 7.63 – 7.69 (m, 2H, 4'-H, 5'-H), 8.07 – 8.13 (m, 1H, 6'-H). <sup>13</sup>C-NMR (126 MHz, CDCl<sub>3</sub>)  $\delta$  19.4 (C-2), 19.8 (C-7/C-8), 20.3 (C-8/C-7), 26.4 (C-6), 28.0 (C-10/C-11), 28.6 (C-11/C-10), 41.8 (C-1), 42.0 (C-3), 66.4 (C-4), 66.8 (C-5), 72.1 (C-9), 123.7 (C-3'), 130.9 (C-6'), 131.6 (C-5'), 133.2 (C-4'), 134.7 (C-1'), 147.7 (C-2'). HRMS (ESI): calc (found) for C<sub>17</sub>H<sub>26</sub>N<sub>2</sub>O<sub>6</sub>S ([M+H]<sup>+</sup>): 387.1584 (387.1582).

**((*S,S*)-**30a**)**

According to GP6C (*S,S*)-**30a** was prepared from (*S*)-*N*-(3-methyl-1-oxobutan-2-yl)-*N*-(4-methylpent-3-en-1-yl)-2-nitrobenzenesulfonamide **29a** (0.72 g, 1.96 mmol) and methyl aluminium dichloride solution (2.0 mL, 1.96 mmol, 1 M in hexane) as a colorless solid (0.16 g, 0.44 mmol, 23 %). Alkene (*R,S*)-**30a** was isolated as well as colorless solid (0.09 g, 0.23 mmol, 12 %). Purification was accomplished by HPLC (OD, *n*-heptane/isopropanol (95 : 5), 15 mL / min,  $R_t$  ((*S,S*)-**30a**) = 32.5 min,  $R_t$  ((*R,S*)-**30a**) = 40 min).

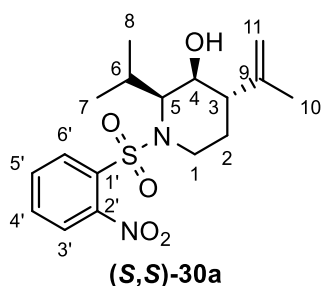

(*S,S*)-**30a**, mp 43 °C.  $[\alpha]_D^{20} + 115$  ( $c$  1.0 in CHCl<sub>3</sub>).  $R_f = 0.77$  (hexanes/EtOAc, 1 : 1, anisaldehyde solution), FT-IR (ATR):  $\tilde{\nu} = 3544$  (w), 3077 (w), 2962 (w), 1646 (w), 1591 (w), 1541 (vs), 1471 (w), 1440 (m), 1369 (s), 1333 (s), 1295 (m), 1256 (m), 1200 (w), 1157 (vs), 1125 (s), 1082 (s), 1001 (s), 966 (m), 901 (s), 852 (m), 799 (m), 778 (m), 763 (s), 729 (s), 653 (m), 598 (vs), 573 (s) cm<sup>-1</sup>.

<sup>1</sup>H-NMR (500 MHz, CDCl<sub>3</sub>)  $\delta$  0.64 (d,  $J = 6.7$  Hz, 3H, 7-H/8-H), 1.13 (d,  $J = 6.7$  Hz, 3H, 8-H/7-H), 1.58 (dddd,  $J = 13.0$  Hz, 13.0 Hz, 13.0 Hz, 5.0 Hz, 1H, 2-H<sub>a</sub>), 1.63 (s, 3H, 10-H), 1.63 – 1.73 (m, 1H, 2-H<sub>b</sub>), 1.86 (s, 1H, OH), 2.15 (dqq,  $J = 9.5$  Hz, 6.7 Hz, 6.7 Hz, 1H, 6-H), 2.45 (ddd,  $J = 13.0$  Hz, 10.8 Hz, 3.9 Hz, 1H, 3-H), 2.94 – 3.05 (m, 1H, 1-H<sub>a</sub>), 3.80 (dd,  $J = 9.5$  Hz, 5.2 Hz, 1H, 5-H), 3.85 (dd,  $J = 10.8$  Hz, 5.2 Hz, 1H, 4-H), 3.90 – 4.00 (m, 1H, 1-H<sub>b</sub>), 4.87 (s, 1H, 11-H<sub>a</sub>), 4.94 (s, 1H, 11-H<sub>b</sub>), 7.59 – 7.65 (m, 1H, 3'-H), 7.65 – 7.72 (m, 2H, 4'-H, 5'-H), 8.04 – 8.10 (m, 1H, 6'-H). <sup>13</sup>C-NMR (126 MHz, CDCl<sub>3</sub>)  $\delta$  18.8 (C-10), 20.4 (C-7/C-8), 22.3 (C-8/C-7), 25.7 (C-6), 30.3 (C-2), 41.4 (C-1), 46.4 (C-3), 62.7 (C-5), 71.7 (C-4), 114.5 (C-11), 124.2 (C-3'), 130.8 (C-6'), 131.7 (C-5'), 133.3 (C-4'), 134.6 (C-1'), 144.6 (C-9), 147.5 (C-2'). HRMS (ESI): calc (found) for C<sub>17</sub>H<sub>24</sub>N<sub>2</sub>O<sub>5</sub>S ([M+H]<sup>+</sup>): 369.1479 (369.1481).

**(2*R*,3*S*,4*R*)-2-Isopropyl-1-((2-nitrophenyl)sulfonyl)-4-(prop-1-en-2-yl)piperidin-3-ol**  
**((*S*,*R*)-**30b**) and (2*R*,3*S*,4*S*)-4-(2-Hydroxyprop-2-yl)-2-isopropyl-1-((2-nitrophenyl)-**  
**sulfonyl)-piperidin-3-ol ((*S*,*S*)-**31b**)**

According to GP6A (*S*,*R*)-**30b** was prepared from (*R*)-*N*-(3-methyl-1-oxobutan-2-yl)-*N*-(4-methylpent-3-en-1-yl)-2-nitrobenzenesulfonamide **29b** (0.41 g, 1.11 mmol) and iron(III)-chloride solution (2.2 mL, 2.22 mmol, 1 M in diethyl ether) as a colorless solid (0.28 g, 0.76 mmol, 68 %). Diol (*S*,*S*)-**31b** was isolated as well as a colorless solid (0.05 g, 0.13 mmol, 12 %). Purification was accomplished via column chromatography on SiO<sub>2</sub> with hexanes/EtOAc (3 : 1 → 2 : 1 → 1 : 1).

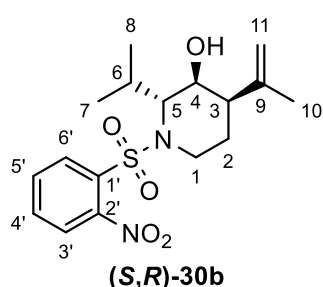

**(*S*,*R*)-**30b****, mp 146 °C.  $[\alpha]_D^{20} - 110$  (*c* 1.0 in CHCl<sub>3</sub>).  $R_f = 0.46$  (hexanes/EtOAc, 2 : 1, anisaldehyde solution). FT-IR (ATR):  $\tilde{\nu} = 3549$  (w), 3091 (w), 2966 (m), 2931 (w), 2876 (w), 1646 (w), 1590 (w), 1542 (vs), 1470 (m), 1439 (m), 1372 (s), 1338 (s), 1294 (m), 1280 (m), 1207 (w), 1157 (vs), 1125 (s), 1095 (m), 1065 (m), 1045 (m), 975 (s), 913 (s), 852 (m), 776 (m), 752 (s), 733 (s), 670 (m), 650 (w), 623 (w), 579 (vs), 562 (s) cm<sup>-1</sup>. <sup>1</sup>H-NMR (500 MHz, CDCl<sub>3</sub>)  $\delta$  0.86 (d, *J* = 6.5 Hz, 3H, 7-H/8-H), 1.03 (d, *J* = 6.5 Hz, 3H, 8-H/7-H), 1.41 (d, *J* = 13.1 Hz, 1H, 2-H<sub>a</sub>), 1.77 (s, 3H, 10-H), 1.83 (ddt, *J* = 13.1 Hz, 13.1 Hz, 4.7 Hz, 1H, 2-H<sub>b</sub>), 1.99 (s, br, 1H, OH), 2.05 (dq, *J* = 10.8 Hz, 6.5 Hz, 6.5 Hz, 1H, 6-H), 2.26 (d, *J* = 12.5 Hz, 1H, 3-H), 3.10 (t, *J* = 13.7 Hz, 1H, 1-H<sub>a</sub>), 3.69 (d, *J* = 10.8 Hz, 1H, 5-H), 4.02 – 4.12 (m, 2H, 1-H<sub>b</sub>, 4-H), 4.68 (s, 1H, 11-H<sub>a</sub>), 4.93 (s, 1H, 11-H<sub>b</sub>), 7.50 – 7.56 (m, 1H, 3'-H), 7.58 – 7.67 (m, 2H, 4'-H, 5'-H), 8.10 – 8.17 (m, 1H, 6'-H). <sup>13</sup>C-NMR (126 MHz, CDCl<sub>3</sub>)  $\delta$  19.9 (C-7/C-8), 20.4 (C-8/C-7), 21.9 (C-10), 22.6 (C-2), 26.5 (C-6), 41.4 (C-1), 41.6 (C-3), 65.2 (C-4), 66.0 (C-5), 112.2 (C-11), 123.5 (C-3'), 131.2 (C-6'), 131.3 (C-5'), 133.1 (C-4'), 134.7 (C-1'), 145.1 (C-9), 147.9 (C-2'). HRMS (ESI): calc (found) for C<sub>17</sub>H<sub>24</sub>N<sub>2</sub>O<sub>5</sub>S ([M+Na]<sup>+</sup>): 391.1298 (391.1299).

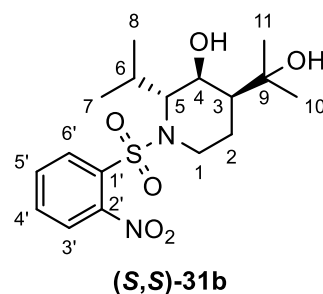

**(*S*,*S*)-**31b****, mp 180 °C.  $[\alpha]_D^{20} - 135$  (*c* 1.0 in CHCl<sub>3</sub>).  $R_f = 0.22$  (hexanes/EtOAc, 1 : 1, anisaldehyde solution). FT-IR (ATR):  $\tilde{\nu} = 3365$  (w, br), 2970 (m), 2939 (m), 2877 (w), 1732 (w), 1591 (w), 1543 (vs), 1470 (m), 1440 (w), 1372 (s), 1341 (s), 1278 (m), 1216 (w), 1158 (s), 1126 (m), 1092 (w), 1065 (m), 1048 (w), 970 (m), 911 (m), 853 (w), 806 (w), 776 (w), 751 (m), 734 (s), 685 (w), 653 (w), 637 (w), 581 (s), 562 (m) cm<sup>-1</sup>. <sup>1</sup>H-NMR (500 MHz, CDCl<sub>3</sub>)  $\delta$  0.77 (d, *J* = 6.8 Hz, 3H, 1-H), 0.98 (d, *J* = 6.8 Hz, 3H, 2-H), 1.17 (s, 3H, 10-H/11-H), 1.32 (s, 3H, 11-H/10-H), 1.46

(ddd,  $J = 13.3$  Hz, 3.7 Hz, 2.1 Hz, 1H, 3-H), 1.58 – 1.62 (m, 1H, 2-H<sub>a</sub>), 1.89 (ddt,  $J = 13.3$  Hz, 13.3 Hz, 5.0 Hz, 1H, 2-H<sub>b</sub>), 1.95 (dq,  $J = 10.8$  Hz, 6.8 Hz, 6.8 Hz, 1H, 6-H), 3.01 (s, br, 2H, 2 × OH), 3.11 (ddd,  $J = 13.3$  Hz, 13.3 Hz, 3.0 Hz, 1H, 1-H<sub>a</sub>), 3.52 (d,  $J = 10.8$  Hz, 1H, 5-H), 4.09 – 4.16 (m, 1H, 1-H<sub>b</sub>), 4.36 – 4.42 (m, 1H, 4-H), 7.53 – 7.58 (m, 1H, 3'-H), 7.63 – 7.69 (m, 2H, 4'-H/5'-H), 8.07 – 8.13 (m, 1H, 6'-H). <sup>13</sup>C-NMR (126 MHz, CDCl<sub>3</sub>)  $\delta$  19.4 (C-2), 19.8 (C-7/C-8), 20.3 (C-8/C-7), 26.4 (C-6), 28.0 (C-10/C-11), 28.6 (C-11/C-10), 41.7 (C-1), 42.0 (C-3), 66.4 (C-4), 66.8 (C-5), 72.1 (C-9), 123.7 (C-3'), 130.9 (C-6'), 131.6 (C-5'), 133.2 (C-4'), 134.7 (C-1'), 147.7 (C-2'). HRMS (ESI): calc (found) for C<sub>17</sub>H<sub>26</sub>N<sub>2</sub>O<sub>6</sub>S ([M+Na]<sup>+</sup>): 409.1404 (409.1407).

**(2*S*,3*R*,4*S*)-2-Isobutyl-1-((2-nitrophenyl)sulfonyl)-4-(prop-1-en-2-yl)piperidin-3-ol ((*R,S*)-30c), (2*S*,3*S*,4*S*)-2-Isobutyl-1-((2-nitrophenyl)sulfonyl)-4-(prop-1-en-2-yl)piperidin-3-ol ((*S,S*)-30c), (2*S*,3*S*,4*R*)-4-(2-Hydroxypropan-2-yl)-2-isobutyl-1-((2-nitrophenyl)sulfonyl)piperidin-3-ol ((*S,R*)-31c) and (2*S*,3*R*,4*R*)-4-(2-Hydroxypropan-2-yl)-2-isobutyl-1-((2-nitrophenyl)sulfonyl)-piperidin-3-ol ((*R,R*)-31c)**

According to GP6A (*R,S*)-**30c** was prepared from (*S*)-*N*-(4-methyl-1-oxopentan-2-yl)-*N*-(4-methylpent-3-en-1-yl)-2-nitrobenzenesulfonamide **29c** (1.08 g, 2.82 mmol) and iron(III)-chloride solution (5.6 mL, 5.64 mmol, 1 M in diethyl ether) as a colorless solid (63.0 mg, 0.17 mmol, 52 %). Alkene (*S,S*)-**30c** was isolated as well as a colorless solid (4.00 mg, 0.01 mmol, 3 %). Purification was accomplished by HPLC (Orbit, hexane/isopropanol (97 : 3), 12 mL / min,  $R_t$  ((*R,S*)-**30c**) = 19 min,  $R_t$  ((*S,S*)-**30c**) = 21 min). In addition diols (*S,R*)-**31c** and (*R,R*)-**31c** were isolated as colorless solids ((*S,R*)-**31c** 3.00 mg, 7.49  $\mu$ mol, 2 %; (*R,R*)-**31c** 12.0 mg, 0.03 mmol, 9 %). Purification was accomplished by HPLC (Orbit, hexanes/isopropanol (90 : 10), 15 mL / min,  $R_t$  ((*S,R*)-**31c**) = 19 min,  $R_t$  ((*R,R*)-**31c**) = 21 min). Mixtures of alkenes and diols were separated beforehand via column chromatography on SiO<sub>2</sub> with hexanes/EtOAc (3 : 1  $\rightarrow$  2 : 1  $\rightarrow$  1 : 1).

Alkene (*R,S*)-**30c** was also prepared according to GP6B from (*S*)-*N*-(4-methyl-1-oxopentan-2-yl)-*N*-(4-methylpent-3-en-1-yl)-2-nitrobenzenesulfonamide **29c** (0.63 g, 1.65 mmol) and samarium diiodide solution (18.2 mL, 1.82 mmol, 0.1 M in THF) as a colorless solid (0.33 g, 0.87 mmol, 53 %). Purification was accomplished via column chromatography on SiO<sub>2</sub> with hexanes/EtOAc (3 : 1).

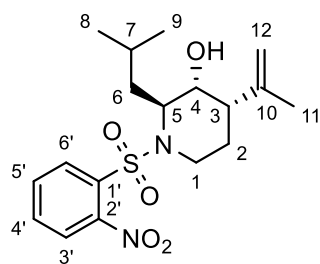

**(R,S)-30c**

(*R,S*)-**30c**, mp 141 °C.  $[\alpha]_{\text{D}}^{20} + 71$  (*c* 0.5 in  $\text{CHCl}_3$ ).  $R_{\text{f}} = 0.49$  (hexanes/ EtOAc, 2 : 1, anisaldehyde solution). FT-IR (ATR):  $\tilde{\nu} = 3542$  (w), 3089 (w), 2956 (m), 2923 (m), 2853 (m), 1725 (w), 1646 (w), 1608 (w), 1591 (w), 1541 (vs), 1467 (m), 1439 (m), 1371 (s), 1340 (s), 1272 (m), 1206 (w), 1160 (vs), 1130 (s), 1067 (m), 1049 (w), 991 (m), 940 (m), 928 (m), 852 (m), 829 (w), 777 (m), 747 (m), 732 (m), 671 (m), 615 (m), 578 (s), 451 (w), 418 (w)  $\text{cm}^{-1}$ .  $^1\text{H-NMR}$  (500 MHz,  $\text{CDCl}_3$ )  $\delta$  0.92 (d,  $J = 6.6$  Hz, 3H, 8-H/9-H), 0.93 (d,  $J = 6.6$  Hz, 3H, 9-H/8-H), 1.38 – 1.47 (m, 2H, 2- $\text{H}_{\text{a}}$ , 6- $\text{H}_{\text{a}}$ ), 1.57 (ddd,  $J = 13.8$  Hz, 7.0 Hz, 7.0 Hz, 1H, 6- $\text{H}_{\text{b}}$ ), 1.64 (ddqq,  $J = 7.0$  Hz, 7.0 Hz, 6.6 Hz, 6.6 Hz, 1H, 7-H), 1.77 (s, 3H, 11-H), 1.88 (ddt,  $J = 13.4$  Hz, 12.9 Hz, 4.5 Hz, 1H, 2- $\text{H}_{\text{b}}$ ), 2.28 (d,  $J = 12.9$  Hz, 1H, 3-H), 3.20 (ddd,  $J = 13.6$  Hz, 13.4 Hz, 2.5 Hz, 1H, 1- $\text{H}_{\text{a}}$ ), 3.76 – 3.79 (m, 1H, 4-H), 3.92 – 4.00 (m, 1H, 1- $\text{H}_{\text{b}}$ ), 4.11 – 4.16 (m, 1H, 5-H), 4.71 (s, 1H, 12- $\text{H}_{\text{a}}$ ), 4.95 (s, 1H, 12- $\text{H}_{\text{b}}$ ), 7.56 – 7.61 (m, 1H, 3'-H), 7.63 – 7.68 (m, 2H, 4'-H, 5'-H), 8.13 – 8.18 (m, 1H, 6'-H).  $^{13}\text{C-NMR}$  (126 MHz,  $\text{CDCl}_3$ )  $\delta$  22.0 (C-11), 22.7 (C-8, C-9), 22.7 (C-2), 24.9 (C-7), 38.1 (C-6), 41.0 (C-1), 41.2 (C-3), 57.8 (C-5), 67.3 (C-4), 112.4 (C-12), 123.9 (C-3'), 131.3 (C-6'), 131.4 (C-4'/C-5'), 133.2 (C-5'/C-4'), 134.3 (C-1'), 145.0 (C-10), 147.9 (C-2'). HRMS (ESI): calc (found) for  $\text{C}_{18}\text{H}_{26}\text{N}_2\text{O}_5\text{S}$  ( $[\text{M}+\text{Na}]^+$ ): 405.1455 (405.1459).

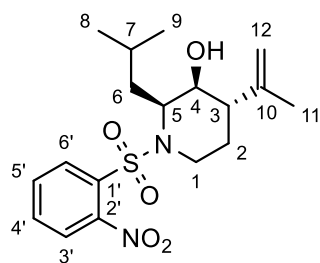

**(S,S)-30c**

(*S,S*)-**30c**, mp 37 °C.  $[\alpha]_{\text{D}}^{20} + 50$  (*c* 0.2 in  $\text{CHCl}_3$ ).  $R_{\text{f}} = 0.49$  (hexanes/ EtOAc, 2 : 1, anisaldehyde solution). FT-IR (ATR):  $\tilde{\nu} = 35475$  (w), 3077 (w), 2954 (m), 2925 (m), 2870 (w), 1646 (w), 1590 (w), 1543 (vs), 1467 (m), 1439 (m), 1369 (s), 1334 (s), 1294 (m), 1263 (m), 1160 (vs), 1127 (s), 1080 (s), 1060 (m), 1016 (m), 966 (m), 941 (m), 906 (s), 852 (m), 828 (w), 812 (w), 778 (m), 747 (s), 732 (s), 702 (w), 652 (m), 594 (vs), 567 (s), 447 (w)  $\text{cm}^{-1}$ .  $^1\text{H-NMR}$  (500 MHz,  $\text{CDCl}_3$ )  $\delta$  0.72 (d,  $J = 6.4$  Hz, 3H, 8-H/9-H), 0.85 (d,  $J = 6.4$  Hz, 3H, 9-H/8-H), 1.40 – 1.59 (m, 4H, 2- $\text{H}_{\text{a}}$ , 6-H, 7-H), 1.59 – 1.65 (m, 1H, 2- $\text{H}_{\text{b}}$ ), 1.61 (s, 3H, 11-H), 1.81 (d,  $J = 2.3$  Hz, 1H, OH), 2.32 (dt,  $J = 11.7$  Hz, 4.2 Hz, 1H, 3-H), 3.07 – 3.19 (m, 1H, 1- $\text{H}_{\text{a}}$ ), 3.71 (ddd,  $J = 10.6$  Hz, 5.3 Hz, 2.3 Hz, 1H, 4-H), 3.84 – 3.92 (m, 1H, 1- $\text{H}_{\text{b}}$ ), 4.16 – 4.23 (m, 1H, 5-H), 4.85 (s, 1H, 12- $\text{H}_{\text{a}}$ ), 4.92 (s, 1H, 12- $\text{H}_{\text{b}}$ ), 7.62 – 7.67 (m, 1H, 3'-H), 7.67 – 7.73 (m, 2H, 4'-H, 5'-H), 8.09 – 8.15 (m, 1H, 6'-H).  $^{13}\text{C-NMR}$  (126 MHz,  $\text{CDCl}_3$ )  $\delta$  18.7 (C-11), 21.4 (C-8/C-9), 23.9 (C-9/C-8), 24.2 (C-7), 29.7 (C-2), 32.8 (C-6), 40.0 (C-1), 45.9 (C-3), 55.6 (C-5), 69.1 (C-4), 114.3 (C-12), 124.3 (C-3'), 131.0 (C-6'), 131.7 (C-5'), 133.5 (C-4'), 134.3 (C-1'), 144.5 (C-10), 147.8 (C-2'). HRMS (ESI): calc (found) for  $\text{C}_{18}\text{H}_{26}\text{N}_2\text{O}_5\text{S}$  ( $[\text{M}+\text{Na}]^+$ ): 405.1455 (405.1456).

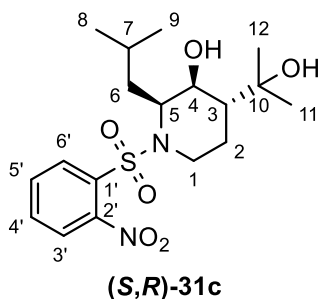

(*S,R*)-**31c**, mp 195 °C.  $[\alpha]_D^{20} + 63$  (*c* 0.1 in  $\text{CHCl}_3$ ).  $R_f = 0.11$  (hexanes/ EtOAc, 2 : 1, anisaldehyde solution). FT-IR (ATR):  $\tilde{\nu} = 3323$  (w, br), 2958 (m), 2930 (m), 2871 (m), 1545 (vs), 1468 (m), 1439 (m), 1370 (s), 1341 (s), 1279 (m), 1216 (w), 1157 (s), 1126 (s), 1078 (m), 1059 (m), 1015 (m), 964 (m), 943 (w), 900 (m), 853 (m), 778 (m), 748 (m), 732 (s), 652 (w), 595 (vs), 567 (m)  $\text{cm}^{-1}$ .  $^1\text{H-NMR}$  (500 MHz,  $\text{CDCl}_3$ )  $\delta$  0.74 (d,  $J = 6.6$  Hz, 3H, 8-H/9-H), 0.85 (d,  $J = 6.6$  Hz, 3H, 9-H/8-H), 1.12 (s, 3H, 11-H/12-H), 1.10 – 1.20 (m, 1H, 2- $\text{H}_a$ ), 1.20 (s, 3H, 12-H/11-H), 1.40 – 1.50 (m, 1H, 7-H), 1.52 – 1.64 (m, 3H, 2- $\text{H}_b$ , 6-H), 1.75 – 1.84 (m, 1H, 3-H), 2.60 (s, br, 1H, OH), 3.06 – 3.18 (m, 1H, 1- $\text{H}_a$ ), 3.83 – 3.89 (m, 1H, 1- $\text{H}_b$ ), 3.90 (dd,  $J = 11.0$  Hz, 5.3 Hz, 1H, 4-H), 4.05 (ddd,  $J = 8.3$  Hz, 5.3 Hz, 5.3 Hz, 1H, 5-H), 4.24 (s, br, 1H, OH), 7.60 – 7.66 (m, 1H, 3'-H), 7.66 – 7.72 (m, 2H, 4'-H, 5'-H), 8.07 – 8.15 (m, 1H, 6'-H).  $^{13}\text{C-NMR}$  (126 MHz,  $\text{CDCl}_3$ )  $\delta$  21.4 (C-8/C-9), 23.1 (C-11/C-12), 23.9 (C-9/C-8), 24.3 (C-7), 27.3 (C-2), 30.0 (C-12/C-11), 33.0 (C-6), 40.1 (C-1), 45.0 (C-3), 56.1 (C-5), 71.8 (C-4), 74.9 (C-10), 124.3 (C-3'), 131.0 (C-6'), 131.7 (C-5'), 133.4 (C-4'), 134.4 (C-1'), 147.8 (C-2'). HRMS (ESI): calc (found) for  $\text{C}_{18}\text{H}_{28}\text{N}_2\text{O}_6\text{S}$  ( $[\text{M}+\text{Na}]^+$ ): 423.1560 (423.1563).

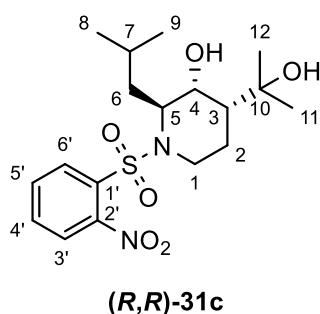

(*R,R*)-**31c**, mp 54 °C.  $[\alpha]_D^{20} + 210$  (*c* 0.1 in  $\text{CHCl}_3$ ).  $R_f = 0.11$  (hexanes/ EtOAc, 2 : 1, anisaldehyde solution). FT-IR (ATR):  $\tilde{\nu} = 3373$  (w, br), 2960 (m), 2925 (m), 2872 (m), 1544 (vs), 1469 (m), 1372 (s), 1341 (s), 1261 (m), 1159 (s), 1126 (s), 1094 (m), 1067 (m), 946 (m), 852 (m), 801 (m), 746 (m), 684 (w), 652 (m), 580 (s)  $\text{cm}^{-1}$ .  $^1\text{H-NMR}$  (500 MHz,  $\text{CDCl}_3$ )  $\delta$  0.86 (d,  $J = 6.6$  Hz, 3H, 8-H/9-H), 0.89 (d,  $J = 6.6$  Hz, 3H, 9-H/8-H), 1.18 (s, 3H, 11-H/12-H), 1.23 – 1.32 (m, 1H, 6- $\text{H}_a$ ), 1.30 (s, 3H, 12-H/11-H), 1.42 – 1.62 (m, 4H, 2- $\text{H}_a$ , 3-H, 6- $\text{H}_b$ , 7-H), 1.90 (dddd,  $J = 13.4$  Hz, 13.4 Hz, 13.4 Hz, 4.9 Hz, 1H, 2- $\text{H}_b$ ), 2.79 (s, br, 1H, OH), 3.15 – 3.24 (m, 1H, 1- $\text{H}_a$ ), 3.23 (s, br, 1H, OH), 3.97 – 4.04 (m, 2H, 1- $\text{H}_b$ , 5-H), 4.07 – 4.12 (m, 1H, 4-H), 7.55 – 7.61 (m, 1H, 3'-H), 7.63 – 7.70 (m, 2H, 4'-H, 5'-H), 8.10 – 8.17 (m, 1H, 6'-H).  $^{13}\text{C-NMR}$  (126 MHz,  $\text{CDCl}_3$ )  $\delta$  19.4 (C-2), 22.5 (C-8/C-9), 22.8 (C-9/C-8), 24.8 (C-7), 28.1 (C-11/C-12), 28.6 (C-12/C-11), 37.9 (C-6), 41.1 (C-1), 41.8 (C-3), 58.7 (C-5), 68.8 (C-4), 72.3 (C-10), 123.9 (C-3'), 131.0 (C-6'), 131.7 (C-5'), 133.3 (C-4'), 134.3 (C-1'), 147.8 (C-2'). HRMS (ESI): calc (found) for  $\text{C}_{18}\text{H}_{28}\text{N}_2\text{O}_6\text{S}$  ( $[\text{M}+\text{Na}]^+$ ): 423.1560 (423.1563).

**(2*S*,3*R*,4*S*)-2-((*S*)-*sec*-Butyl)-1-((2-nitrophenyl)sulfonyl)-4-(prop-1-en-2-yl)-piperidin-3-ol ((*R*,*S*)-**30e**) and (2*S*,3*R*,4*R*)-2-((*S*)-*sec*-Butyl)-4-(2-hydroxypropan-2-yl)-1-((2-nitrophenyl)sulfonyl)piperidin-3-ol ((*R*,*R*)-**31e**)**

According to GP6A (*R*,*S*)-**30e** was prepared from *N*-((2*S*,3*S*)-3-methyl-1-oxopentan-2-yl)-*N*-(4-methylpent-3-en-1-yl)-2-nitrobenzenesulfonamide **29e** (0.72 mg, 1.87 mmol) and iron(III)chloride solution (3.74 mL, 3.74 mmol, 1 M in diethyl ether) as a colorless solid (0.42 g, 1.09 mmol, 58 %). Diol (*R*,*R*)-**31e** was isolated as well as a colorless solid (79.0 mg, 0.20 mmol, 11 %). Purification was accomplished via column chromatography on SiO<sub>2</sub> with hexanes/EtOAc (2 : 1 → 1 : 1 → 1 : 2).

Alkene (*R*,*S*)-**30e** was also prepared according to GP6B from *N*-((2*S*,3*S*)-3-methyl-1-oxopentan-2-yl)-*N*-(4-methylpent-3-en-1-yl)-2-nitrobenzenesulfonamide **29e** (0.13 g, 0.34 mmol) and samarium diiodide solution (3.7 mL, 0.37 mmol, 0.1 M in THF) as a colorless solid (0.07 g, 0.19 mmol, 57 %). Purification was accomplished via column chromatography on SiO<sub>2</sub> with hexanes/EtOAc (3 : 1).

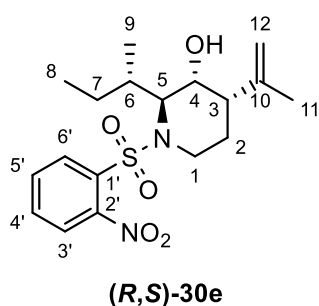

(*R*,*S*)-**30e**, mp 124 °C.  $[\alpha]_D^{20} + 24$  (*c* 0.9 in CHCl<sub>3</sub>).  $R_f = 0.37$  (hexanes/EtOAc, 3 : 1, anisaldehyde solution). FT-IR (ATR):  $\tilde{\nu} = 3551$  (w, br), 3089 (w), 2965 (m), 2930 (m), 2877 (w), 1646 (w), 1590 (w), 1542 (vs), 1464 (m), 1440 (m), 1372 (s), 1338 (s), 1280 (m), 1206 (w), 1159 (s), 1126 (m), 1098 (w), 1065 (m), 1047 (w), 988 (m), 974 (m), 952 (m), 907 (m), 853 (m), 824 (w), 776 (m),

751 (s), 734 (m), 671 (m), 651 (w), 622 (w), 580 (s), 531 (w) cm<sup>-1</sup>. <sup>1</sup>H-NMR (400 MHz, CDCl<sub>3</sub>)  $\delta$  0.80 (t,  $J = 7.1$  Hz, 3H, 8-H), 0.84 – 0.93 (m, 1H, 7-H<sub>a</sub>), 0.94 (d,  $J = 6.6$  Hz, 3H, 9-H), 1.30 – 1.40 (m, 1H, 2-H<sub>a</sub>), 1.47 – 1.60 (m, 1H, 7-H<sub>b</sub>), 1.72 (s, 3H, 11-H), 1.72 – 1.84 (m, 2H, 2-H<sub>b</sub>, 3-H), 1.93 (d,  $J = 2.8$  Hz, 1H, OH), 2.18 – 2.30 (m, 1H, 6-H), 2.99 – 3.13 (m, 1H, 1-H<sub>a</sub>), 3.70 – 3.78 (m, 1H, 4-H), 3.95 – 4.07 (m, 2H, 1-H<sub>b</sub>, 5-H), 4.62 (s, 1H, 12-H<sub>a</sub>), 4.87 (s, 1H, 12-H<sub>b</sub>), 7.43 – 7.52 (m, 1H, 3'-H), 7.55 – 7.65 (m, 2H, 4'-H, 5'-H), 8.05 – 8.15 (m, 1H, 6'-H). <sup>13</sup>C-NMR (101 MHz, CDCl<sub>3</sub>)  $\delta$  11.3 (C-8), 16.2 (C-9), 21.9 (C-11), 22.4 (C-2), 25.2 (C-7), 32.7 (C-3), 41.2 (C-6), 41.6 (C-1), 65.0 (C-4), 65.3 (C-5), 112.1 (C-12), 123.4 (C-3'), 131.2 (C-5'), 131.3 (C-6'), 133.2 (C-4'), 134.4 (C-1'), 145.1 (C-10), 148.0 (C-2'). HRMS (ESI): calc (found) for C<sub>18</sub>H<sub>26</sub>N<sub>2</sub>O<sub>5</sub>S ([M+Na]<sup>+</sup>): 405.1455 (405.1463).

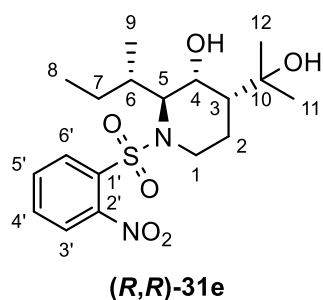

(*R,R*)-**31e**, mp 166 °C.  $[\alpha]_D^{20} + 13$  (*c* 1.0 in CHCl<sub>3</sub>).  $R_f$  = 0.08 (hexanes/EtOAc, 3 : 1, anisaldehyde solution). FT-IR (ATR):  $\tilde{\nu}$  = 3362 (w, br), 2966 (m), 2930 (m), 2877 (m), 1732 (w), 1591 (w), 1543 (vs), 1464 (m), 1440 (m), 1372 (s), 1341 (s), 1277 (m), 1241 (w), 1213 (w), 1158 (s), 1126 (s), 1094 (w), 1065 (m), 958 (m), 908 (m), 852 (m), 806 (w), 776 (m), 751 (m), 734 (m), 686 (w), 653

(w), 637 (w), 581 (s) cm<sup>-1</sup>. <sup>1</sup>H-NMR (700 MHz, CDCl<sub>3</sub>)  $\delta$  0.76 – 0.80 (m, 3H, 8-H), 0.80 – 0.85 (m, 1H, 7-H<sub>a</sub>), 0.92 (d, *J* = 6.5 Hz, 3H, 9-H), 1.15 (s, 3H, 11-H/12-H), 1.30 (s, 3H, 12-H/11-H), 1.41 – 1.47 (m, 1H, 3-H), 1.47 – 1.55 (m, 2H, 2-H<sub>a</sub>, 7-H<sub>b</sub>), 1.60 – 1.70 (m, 1H, 6-H), 1.81 – 1.90 (dddd, *J* = 13.3 Hz, 13.3 Hz, 13.3 Hz, 5.0 Hz, 1H, 2-H<sub>b</sub>), 2.93 (s, br, 2H, 2xOH), 3.04 – 3.12 (m, 1H, 1-H<sub>a</sub>), 3.59 (d, *J* = 10.9 Hz, 1H, 5-H), 4.05 – 4.13 (m, 1H, 1-H<sub>b</sub>), 4.38 – 4.41 (m, 1H, 4-H), 7.50 – 7.55 (m, 1H, 3'-H), 7.60 – 7.67 (m, 2H, 4'-H, 5'-H), 8.06 – 8.12 (m, 1H, 6'-H). <sup>13</sup>C-NMR (176 MHz, CDCl<sub>3</sub>)  $\delta$  11.2 (C-8), 16.1 (C-9), 19.2 (C-2), 25.1 (C-7), 28.0 (C-11/C-12), 28.6 (C-12/C-11), 32.5 (C-6), 41.8 (C-1), 41.8 (C-3), 65.7 (C-5), 66.5 (C-4), 72.2 (C-10), 123.5 (C-3'), 130.9 (C-6'), 131.5 (C-5'), 133.2 (C-4'), 134.6 (C-1'), 147.8 (C-2'). HRMS (ESI): calc (found) for C<sub>18</sub>H<sub>28</sub>N<sub>2</sub>O<sub>6</sub>S ([M+Na]<sup>+</sup>): 423.1560 (423.1560).

**(2*S*,3*R*,4*S*)-2-Benzyl-1-((2-nitrophenyl)sulfonyl)-4-(prop-1-en-2-yl)piperidin-3-ol ((*R,S*)-30f), (2*S*,3*S*,4*S*)-2-Benzyl-1-((2-nitrophenyl)sulfonyl)-4-(prop-1-en-2-yl)piperidin-3-ol ((*S,S*)-30f) and (2*S*,3*R*,4*R*)-2-Benzyl-4-(2-hydroxypropan-2-yl)-1-((2-nitrophenyl)sulfonyl)-piperidin-3-ol ((*R,R*)-31f)**

According to GP6A (*R,S*)-**30f** was prepared from (*S*)-*N*-(4-methylpent-3-en-1-yl)-2-nitro-*N*-(1-oxo-3-phenylpropan-2-yl)benzenesulfonamide **29f** (0.44 g, 1.06 mmol) and iron(III)chloride solution (2.1 mL, 2.12 mmol, 1 M in diethyl ether) as a colorless solid (0.10 g, 0.24 mmol, 23 %). Alkene (*S,S*)-**30f** and diol (*R,R*)-**31f** were isolated as colorless solids as well ((*S,S*)-**30f** 0.12 g, 0.30 mmol, 28 % and (*R,R*)-**31f** 6.00 mg, 0.01 mmol, 3 %). Diol (*R,R*)-**31f** was isolated via column chromatography on SiO<sub>2</sub> with hexanes/EtOAc (2 : 1 → 1 : 1 → 1 : 2). Purification of the mixture of alkenes was accomplished by HPLC (OD, *n*-hexane/isopropanol (90 : 10), 15 mL / min,  $R_t$  ((*R,S*)-**30f**) = 44 min,  $R_t$  ((*S,S*)-**30f**) = 51 min).

Alkene (*R,S*)-**30f** was also prepared according to GP6B from (*S*)-*N*-(4-methylpent-3-en-1-yl)-2-nitro-*N*-(1-oxo-3-phenylpropan-2-yl)benzenesulfonamide **29f** (0.32 g, 0.78 mmol) and samarium diiodide solution (8.6 mL, 0.86 mmol, 0.1 M in THF) as a colorless solid (0.21 g, 0.51 mmol, 65 %). Purification was accomplished via column chromatography on SiO<sub>2</sub> with hexanes/EtOAc (3 : 1).

Alkenes (*R,S*)-**30f** and (*S,S*)-**30f** were also prepared according to GP6C from (*S*)-*N*-(4-methylpent-3-en-1-yl)-2-nitro-*N*-(1-oxo-3-phenylpropan-2-yl)benzenesulfonamide **29f** (0.17 g, 0.40 mmol) and methyl aluminium dichloride solution (0.4 mL, 0.40 mmol, 1 M in hexane) as a brown oil (crude yield: 0.18 g, 0.42 mmol, quant, ratio: 21 % (*R,S*)-**30f**, 79 % (*S,S*)-**30f**). The mixture wasn't purified. The ratio was taken from <sup>1</sup>H-NMR spectrum.

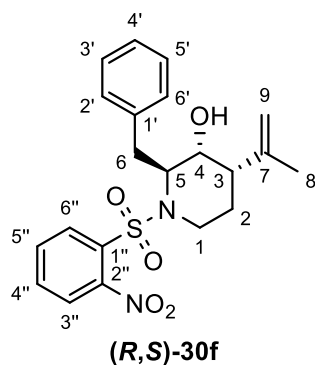

(*R,S*)-**30f**, mp 110 °C.  $[\alpha]_{\text{D}}^{20} + 196$  (*c* 1.0 in CHCl<sub>3</sub>). *R*<sub>f</sub> = 0.27 (hexanes/ EtOAc, 3 : 1, anisaldehyde solution). FT-IR (ATR):  $\tilde{\nu}$  = 3545 (w, br), 3087 (w), 3028 (w), 2946 (w), 2854 (w), 1646 (w), 1541 (vs), 1497 (w), 1440 (w), 1369 (s), 1331 (m), 1159 (s), 1126 (m), 1079 (m), 1016 (w), 954 (m), 906 (w), 853 (w), 777 (w), 756 (m), 741 (m), 700 (m), 652 (w), 593 (s), 576 (m), 505 (w) cm<sup>-1</sup>. <sup>1</sup>H NMR (500 MHz, CDCl<sub>3</sub>)  $\delta$  1.70 – 1.82 (m, 2H, 2-H), 1.75 (s, 3H, 8-H), 2.05 (s, br, 1H, OH), 2.47 (ddd, *J* = 10.9 Hz, 10.9 Hz, 5.2 Hz, 1H, 3-H), 2.78 (dd, *J* = 14.1 Hz, 11.4 Hz, 1H, 6-H<sub>a</sub>), 3.12 (dd, *J* = 14.1 Hz, 3.1 Hz, 1H, 6-H<sub>b</sub>), 3.37 (ddd, *J* = 14.9 Hz, 11.9 Hz, 3.9 Hz, 1H, 1-H<sub>a</sub>), 3.95 (dd, *J* = 10.9 Hz, 5.5 Hz, 1H, 4-H), 4.01 – 4.08 (m, 1H, 1-H<sub>b</sub>), 4.39 (ddd, *J* = 11.4 Hz, 5.5 Hz, 3.1 Hz, 1H, 5-H), 4.96 (s, 1H, 9-H<sub>a</sub>), 5.01 (s, 1H, 9-H<sub>b</sub>), 6.83 – 6.92 (m, 3H, 3'-H, 4'-H, 5'-H), 6.96 – 7.04 (m, 2H, 2'-H, 6'-H), 7.24 – 7.30 (m, 1H, 5''-H), 7.37 – 7.42 (m, 1H, 6''-H), 7.43 – 7.50 (m, 2H, 3''-H, 4''-H). <sup>13</sup>C-NMR (126 MHz, CDCl<sub>3</sub>)  $\delta$  18.8 (C-8), 29.8 (C-6), 30.7 (C-2), 40.5 (C-1), 46.4 (C-3), 60.6 (C-5), 69.8 (C-4), 114.6 (C-9), 124.2 (C-3''), 126.3 (C-4'), 128.0 (C-3', C-5'), 129.2 (C-2', C-6'), 130.7 (C-6''), 131.9 (C-5''), 132.6 (C-4''), 134.1 (C-1''), 138.4 (C-1'), 144.4 (C-7), 147.0 (C-2''). HRMS (ESI): calc (found) for C<sub>21</sub>H<sub>24</sub>N<sub>2</sub>O<sub>5</sub>S ([M+Na]<sup>+</sup>): 439.1298 (439.1297).

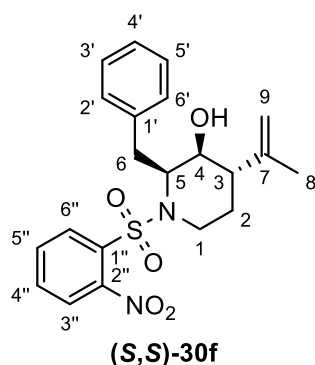

(*S,S*)-**30f**, mp 54 °C.  $[\alpha]_{\text{D}}^{20} + 58$  (*c* 0.38 in CHCl<sub>3</sub>). *R*<sub>f</sub> = 0.27 (hexanes/ EtOAc, 3 : 1, anisaldehyde solution). FT-IR (ATR):  $\tilde{\nu}$  = 3546 (w, br), 3087 (w), 3026 (w), 2923 (m), 2854 (w), 1646 (w), 1591 (w), 1540 (vs), 1495 (w), 1455 (m), 1440 (m), 1371 (s), 1336 (s), 1272 (m), 1159 (vs), 1126 (s), 1094 (w), 1072 (m), 989 (s), 974 (m), 949 (m), 930 (m), 908 (s), 852 (m), 823 (w), 778 (m), 758 (m), 730 (vs), 702 (s), 672 (w), 660 (m), 650 (m), 611 (m), 573 (s), 546 (m), 522 (m), 461 (w), 414 (w) cm<sup>-1</sup>. <sup>1</sup>H-NMR (500 MHz, CDCl<sub>3</sub>)  $\delta$  1.50 – 1.57 (m, 1H, 2-H<sub>a</sub>), 1.73 (s, 3H, 8-H), 1.78 (s, br, 1H, OH), 2.00 (ddt, *J* = 13.2 Hz, 13.2 Hz, 4.8 Hz, 1H, 2-H<sub>b</sub>), 2.42 – 2.50 (m, 1H, 3-H), 2.96 (dd, *J* = 13.6 Hz, 9.7 Hz, 1H, 6-H<sub>a</sub>), 3.05 (dd, *J* = 13.6 Hz, 6.2 Hz, 1H, 6-H<sub>b</sub>), 3.28 – 3.37 (m, 1H, 1-H<sub>a</sub>), 3.72 (s, 1H, 4-H), 3.98 – 4.06 (m, 1H, 1-H<sub>b</sub>), 4.27 – 4.34



through a short cotton pad to remove remaining salts. The filtrate was evaporated and then purified by column chromatography. The product was once again taken up in dichloromethane (5 mL) and filtered over a short cotton pad to remove eluted silica. The filtrate was evaporated to yield the unprotected product.

**Method B:** The reaction was performed according to the literature.<sup>[15]</sup> A round bottom flask was charged with a solution of the *N*-protected derivative (0.13 mmol) in dimethylformamide (2.0 mL) under nitrogen atmosphere. Upon cooling to 0 °C diisopropylethylamine (88.0  $\mu$ L, 67.0 mg, 0.52 mmol) and thiophenol (67.0 mL, 72.0 mg, 0.65 mmol) were added and the mixture was stirred for 7 d at room temperature till TLC showed a complete conversion of the starting material. Afterwards methyl-*tert*-butyl ether (9 mL) was added and the organic phase was extracted with hydrochloric acid (2  $\times$  1 mL, 1 M in water). The aqueous phase was washed with MTBE (3  $\times$  3 mL) and neutralized with sodium hydroxide solution (2 M). The solvents were evaporated and the crude product was taken up in dichloromethane (5 mL) and filtered through a short cotton pad to remove remaining salts. The filtrate was evaporated and then purified by column chromatography. The product was once again taken up in dichloromethane (5 mL) and filtered over a short cotton pad to remove eluted silica. The filtrate was evaporated to yield the unprotected product.

**(2*S*,3*R*,4*S*)-2-Isopropyl-4-(prop-1-en-2-yl)piperidin-3-ol ((*R,S*)-32a)**

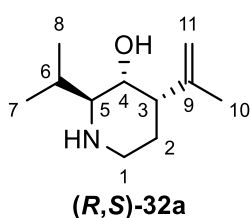

According to GP7A (*R,S*)-32a was prepared from (2*S*,3*R*,4*S*)-2-isopropyl-1-((2-nitrophenyl)-sulfonyl)-4-(prop-1-en-2-yl)-piperidin-3-ol (*R,S*)-30a (0.13 g, 0.34 mmol), potassium carbonate (0.09 g, 0.68 mmol) and thiophenol (0.04 g, 0.37 mmol) as a colorless oil (0.05 g, 0.25 mmol, 74 %). Purification was accomplished via column

chromatography on SiO<sub>2</sub> with dichloromethane/methanol (10 : 1  $\rightarrow$  5 : 1).  $[\alpha]_D^{20} + 45$  (*c* 1.0 in CHCl<sub>3</sub>). *R<sub>f</sub>* = 0.75 (dichloromethane/methanol, 5 : 1, anisaldehyde solution). FT-IR (ATR):  $\tilde{\nu}$  = 3335 (m, br), 3086 (m), 2958 (vs), 2870 (s), 1645 (m), 1469 (s), 1384 (m), 1304 (m), 1259 (m), 1201 (m), 1147 (m), 1119 (m), 1089 (m), 1065 (m), 988 (s), 946 (w), 886 (s), 807 (w), 772 (m), 624 (w), 522 (w), 485 (w), 420 (w) cm<sup>-1</sup>. <sup>1</sup>H-NMR (500 MHz, CDCl<sub>3</sub>)  $\delta$  0.94 (d, *J* = 6.7 Hz, 3H, 7-H/8-H), 1.00 (d, *J* = 6.7 Hz, 3H, 8-H/7-H), 1.38 – 1.47 (m, 1H, 2-H<sub>a</sub>), 1.81 (s, 3H, 10-H), 1.84 (dddd, *J* = 12.6 Hz, 12.6 Hz, 12.6 Hz, 5.6 Hz, 1H, 2-H<sub>b</sub>), 2.00 – 2.14 (m, 1H, 6-H), 2.19 (d, *J* = 12.6 Hz, 1H, 3H), 2.36 (s, br, 2H, OH, NH), 2.48 (dd, *J* = 10.7 Hz, 2.5 Hz, 1H, 5-H), 2.71 – 2.84 (m, 2H, 1-H), 3.93 (s, 1H, 4-H), 4.78 (s, 1H, 11-H<sub>a</sub>), 4.92 – 4.98 (m, 1H, 11-H<sub>b</sub>). <sup>13</sup>C-NMR (126 MHz, CDCl<sub>3</sub>)  $\delta$  19.7 (C-7/C-8), 20.1 (C-8/C-7), 22.1 (C-10), 24.1 (C-2), 24.8

(C-6), 39.3 (C-1), 41.8 (C-3), 64.8 (C-5), 66.0 (C-4), 111.3 (C-11), 146.6 (C-9). HRMS (ESI): calc (found) for  $C_{11}H_{21}NO$  ( $[M+H]^+$ ): 184.1696 (184.1692).

**(2*R*,3*S*,4*R*)-2-Isopropyl-4-(prop-1-en-2-yl)piperidin-3-ol ((*S*,*R*)-32b)**

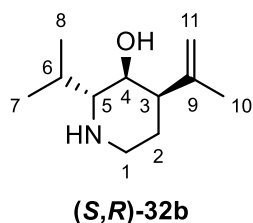

According to GP7A (*S*,*R*)-**32b** was prepared from (2*R*,3*S*,4*R*)-2-Isopropyl-1-((2-nitrophenyl)-sulfonyl)-4-(prop-1-en-2-yl)-piperidin-3-ol (*S*,*R*)-**30b** (52.0 mg, 141  $\mu$ mol), potassium carbonate (39.0 mg, 282  $\mu$ mol) and thiophenol (17.0 mg, 155  $\mu$ mol) as a colorless oil (25.0 mg, 136  $\mu$ mol, 96 %). Purification was accomplished via column

chromatography on  $SiO_2$  with dichloromethane/methanol (10 : 1  $\rightarrow$  5 : 1).  $[\alpha]_D^{20}$  - 14 (*c* 1.0 in  $CHCl_3$ ).  $R_f$  = 0.16 (dichloromethane/methanol, 10 : 1, anisaldehyde solution). FT-IR (ATR):  $\tilde{\nu}$  = 3328 (br, s), 2966 (vs), 2875 (s), 2502 (w), 1733 (m), 1646 (m), 1586 (vs), 1440 (vs), 1396 (s), 1375 (s), 1307 (s), 1265 (m), 1221 (m), 1197 (m), 1168 (m), 1143 (m), 1082 (m), 1063 (m), 1043 (m), 1016 (m), 989 (vs), 946 (w), 887 (s), 848 (w), 834 (m), 718 (w), 625 (m), 579 (m), 529 (s)  $cm^{-1}$ .  $^1H$ -NMR (500 MHz,  $CDCl_3$ )  $\delta$  1.04 (d,  $J$  = 6.6 Hz, 3H, 7-H/8-H), 1.24 (d,  $J$  = 6.6 Hz, 3H, 8-H/7-H), 1.59 – 1.68 (m, 1H, 2-H<sub>a</sub>), 1.78 (s, 3H, 10-H), 2.05 (dq,  $J$  = 10.8 Hz, 6.6 Hz, 6.6 Hz, 1H, 6-H), 2.18 – 2.28 (m, 1H, 3-H), 2.36 (dddd,  $J$  = 13.2 Hz, 13.2 Hz, 13.2 Hz, 5.0 Hz, 1H, 2-H<sub>b</sub>), 2.91 (ddd,  $J$  = 13.2 Hz, 13.2 Hz, 3.5 Hz, 1H, 1-H<sub>a</sub>), 3.30 – 3.42 (m, 1H, 5-H), 3.45 – 3.59 (m, 1H, 1-H<sub>b</sub>), 4.13 – 4.24 (m, 1H, 4-H), 4.79 (s, 1H, 11-H<sub>a</sub>), 4.92 (s, 1H, 11-H<sub>b</sub>).  $^{13}C$ -NMR (176 MHz,  $CDCl_3$ )  $\delta$  19.5 (C-7/C-8), 20.6 (C-8/C-7), 20.8 (C-2), 21.8 (C-10), 25.1 (C-6), 39.1 (C-1), 39.7 (C-3), 65.2 (C-5), 65.3 (C-4), 112.3 (C-11), 144.4 (C-9). HRMS (ESI): calc (found) for  $C_{11}H_{21}NO$  ( $[M+H]^+$ ): 184.1696 (184.1696).

**(2*S*,3*R*,4*S*)-2-((*S*)-*sec*-Butyl)-4-(prop-1-en-2-yl)piperidin-3-ol ((*R*,*S*)-32e)**

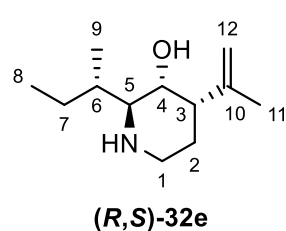

According to GP7A (*R*,*S*)-**32e** was prepared from (2*S*,3*R*,4*S*)-2-((*S*)-*sec*-butyl)-1-((2-nitrophenyl)-sulfonyl)-4-(prop-1-en-2-yl)-piperidin-3-ol (*R*,*S*)-**30e** (65.0 g, 0.17 mmol), potassium carbonate (47.0 mg, 0.34 mmol) and thiophenol (21.0 mg, 0.19 mmol) as a colorless solid (21.0 mg, 0.11 mmol, 62 %). Purification was

accomplished via column chromatography on  $SiO_2$  with dichloromethane/methanol (10 : 1  $\rightarrow$  5 : 1). mp 55  $^{\circ}C$ .  $[\alpha]_D^{20}$  + 11 (*c* 0.46 in  $CHCl_3$ ).  $R_f$  = 0.50 (dichloromethane/methanol, 5 : 1, ninhydrin solution). FT-IR (ATR):  $\tilde{\nu}$  = 3296 (br, w), 2966 (s), 2935 (s), 2878 (m), 1732 (w), 1647 (w), 1580 (m), 1454 (m), 1377 (m), 1307 (m), 1261 (m), 1218 (w), 1193 (w), 1141 (w), 1084 (m), 1067 (m), 1044 (m), 1018 (m), 985 (s), 957 (w), 802 (m), 728 (vs), 643 (m), 624 (m), 552 (w), 519 (w), 491 (w)  $cm^{-1}$ .  $^1H$ -NMR (500 MHz,  $CDCl_3$ )  $\delta$  0.93 (t,  $J$  = 7.2 Hz, 3H, 8-H),

1.00 (d,  $J = 6.7$  Hz, 3H, 9-H), 1.31 – 1.43 (m, 1H, 7-H<sub>a</sub>), 1.59 – 1.69 (m, 1H, 2-H<sub>a</sub>), 1.80 (s, 3H, 11-H), 1.82 – 1.95 (m, 2H, 6-H, 7-H<sub>b</sub>), 2.21 – 2.29 (m, 1H, 3-H), 2.35 (dddd,  $J = 13.4$  Hz, 13.4 Hz, 13.4 Hz, 4.7 Hz, 1H, 2-H<sub>b</sub>), 2.93 (ddd,  $J = 13.4$  Hz, 13.4 Hz, 3.3 Hz, 1H, 1-H<sub>a</sub>), 3.35 – 3.43 (m, 1H, 5-H), 3.43 – 3.52 (m, 1H, 1-H<sub>b</sub>), 4.13 – 4.23 (m, 1H, 4-H), 4.81 (s, 1H, 12-H<sub>a</sub>), 4.95 (s, 1H, 12-H<sub>b</sub>). <sup>13</sup>C-NMR (126 MHz, CDCl<sub>3</sub>)  $\delta$  10.2 (C-8), 15.1 (C-9), 20.9 (C-2), 21.9 (C-11), 25.4 (C-7), 30.8 (C-6), 39.2 (C-1), 39.9 (C-3), 63.0 (C-5), 65.5 (C-4), 112.4 (C-12), 144.4 (C-10). HRMS (ESI): calc (found) for C<sub>12</sub>H<sub>23</sub>NO ([M+H]<sup>+</sup>): 198.1852 (198.1850).

**(2*S*,3*R*,4*S*)-2-Benzyl-4-(prop-1-en-2-yl)piperidin-3-ol ((*R,S*)-**32f**)**

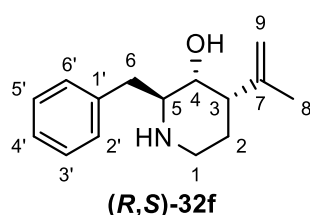

According to GP7A (*R,S*)-**32f** was prepared from (2*S*,3*R*,4*S*)-2-benzyl-1-((2-nitrophenyl)sulfonyl)-4-(prop-1-en-2-yl)-piperidin-3-ol (*R,S*)-**30f** (32.0 mg, 0.08 mmol), potassium carbonate (22.0 mg, 0.16 mmol) and thiophenol (8.0  $\mu$ L, 9.00 mg, 0.08 mmol) as a colorless solid (19.0 mg, 0.08 mmol, quant). Purification was

accomplished via column chromatography on SiO<sub>2</sub> with dichloromethane/methanol (10 : 1  $\rightarrow$  5 : 1). mp 147 °C.  $[\alpha]_D^{20}$  - 25 ( $c$  0.2 in CHCl<sub>3</sub>).  $R_f$  = 0.19 (dichloromethane /methanol, 10 : 1, ninhydrin solution). FT-IR (ATR):  $\tilde{\nu}$  = 3311 (w, br), 2932 (m), 2854 (m), 2476 (w), 1647 (w), 1580 (m), 1496 (m), 1454 (s), 1376 (m), 1312 (m), 1246 (m), 1179 (m), 1099 (m), 1057 (m), 1019 (m), 993 (m), 959 (w), 908 (s), 832 (w), 729 (vs), 645 (m), 625 (m), 585 (m), 543 (m), 489 (w) cm<sup>-1</sup>. <sup>1</sup>H-NMR (500 MHz, CDCl<sub>3</sub>)  $\delta$  1.61 – 1.70 (m, 1H, 2-H<sub>a</sub>), 1.71 (s, 3H, 8-H), 2.23 – 2.35 (m, 1H, 2-H<sub>b</sub>), 2.42 – 2.53 (m, 1H, 3-H), 2.88 – 2.98 (m, 1H, 6-H<sub>a</sub>), 3.09 – 3.20 (m, 1H, 1-H<sub>a</sub>), 3.37 – 3.50 (m, 2H, 1-H<sub>b</sub>, 6-H), 3.76 – 3.84 (m, 1H, 4-H), 3.95 – 4.05 (m, 1H, 5-H), 4.77 (s, 1H, 9-H<sub>a</sub>), 4.95 (s, 1H, 9-H<sub>b</sub>), 7.22 – 7.34 (m, 5H, 2'-H, 3'-H, 4'-H, 5'-H, 6'-H). <sup>13</sup>C-NMR (126 MHz, CDCl<sub>3</sub>)  $\delta$  21.1 (C-2), 21.8 (C-8), 33.6 (C-6), 39.1 (C-1), 39.8 (C-3), 59.3 (C-5), 64.6 (C-4), 112.6 (C-9), 127.3 (C-4'), 129.0 (C-3', C-5'), 129.1 (C-2', C-6'), 135.8 (C-1'), 144.2 (C-7). HRMS (ESI): calc (found) for C<sub>15</sub>H<sub>21</sub>NO ([M+H]<sup>+</sup>): 232.1696 (232.1703).

**(2*S*,3*S*,4*S*)-2-Benzyl-4-(prop-1-en-2-yl)piperidin-3-ol ((*S,S*)-**32f**)**

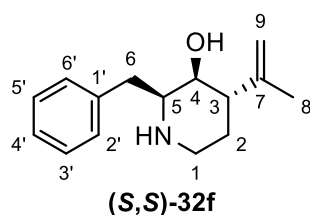

According to GP7A (*S,S*)-**32f** was prepared from (2*S*,3*S*,4*S*)-2-benzyl-1-((2-nitrophenyl)sulfonyl)-4-(prop-1-en-2-yl)-piperidin-3-ol (*S,S*)-**30f** (58.0 mg, 0.14 mmol), potassium carbonate (39.0 mg, 0.28 mmol) and thiophenol (16.0  $\mu$ L, 17.0 mg, 0.15 mmol) as a colorless solid (27.0 mg, 0.12 mmol, 86 %). Purification was

accomplished via column chromatography on SiO<sub>2</sub> with dichloromethane/methanol (10 : 1  $\rightarrow$  5 : 1). mp 213 °C.  $[\alpha]_D^{20}$  - 32 ( $c$  1.0 in CHCl<sub>3</sub>).  $R_f$  = 0.20 (dichloromethane/methanol, 10 : 1,

ninhydrin solution). FT-IR (ATR):  $\tilde{\nu}$  = 3324 (br, s), 3083 (s), 3061 (s), 3027 (s), 2939 (vs), 2849 (s), 2815 (vs), 2713 (s), 2570 (m), 2553 (m), 2486 (m), 1725 (w), 1642 (m), 1604 (m), 1583 (m), 1495 (m), 1445 (vs), 1409 (s), 1381 (s), 1315 (m), 1266 (m), 1199 (m), 1114 (m), 1092 (m), 1075 (m), 1053 (s), 1032 (s), 1018 (s), 1004 (s), 980 (m), 954 (m), 896 (s), 781 (w), 746 (s), 702 (vs), 637 (m), 586 (m), 543 (m), 526 (m), 467 (m), 419 (w)  $\text{cm}^{-1}$ .  $^1\text{H-NMR}$  (700 MHz,  $\text{CDCl}_3$ )  $\delta$  1.51 (s, 3H, 8-H), 1.90 – 1.98 (m, 1H, 2- $\text{H}_a$ ), 2.41 – 2.51 (m, 1H, 2- $\text{H}_b$ ), 2.54 – 2.60 (m, 1H, 3-H), 3.14 (ddd,  $J$  = 12.8 Hz, 12.8 Hz, 3.4 Hz, 1H, 1- $\text{H}_a$ ), 3.20 (dd,  $J$  = 13.0 Hz, 10.8 Hz, 1H, 6- $\text{H}_a$ ), 3.27 (dd,  $J$  = 13.0 Hz, 4.9 Hz, 1H, 6- $\text{H}_b$ ), 3.32 – 3.40 (m, 2H, 1- $\text{H}_b$ , 5-H), 3.95 – 4.01 (m, 1H, 4-H), 4.59 (s, 1H, 9- $\text{H}_a$ ), 4.91 (s, 1H, 9- $\text{H}_b$ ), 7.20 – 7.25 (m, 1H, 4'-H), 7.27 – 7.31 (m, 2H, 3'-H, 5'-H), 7.31 – 7.35 (m, 2H, 2'-H, 6'-H).  $^{13}\text{C-NMR}$  (176 MHz,  $\text{CDCl}_3$ )  $\delta$  20.0 (C-2), 22.0 (C-8), 34.5 (C-6), 41.1 (C-1), 43.4 (C-3), 57.5 (C-5), 64.4 (C-4), 113.1 (C-9), 127.2 (C-4'), 128.9 (C-3', C-5'), 129.5 (C-2', C-6'), 135.5 (C-1'), 142.1 (C-7). HRMS (ESI): calc (found) for  $\text{C}_{15}\text{H}_{21}\text{NO}$  ( $[\text{M}+\text{H}]^+$ ): 232.1696 (232.1692).

**(2*S*,3*R*,4*R*)-4-(2-Hydroxypropan-2-yl)-2-isopropylpiperidin-3-ol ((*R,R*)-**33a**)**

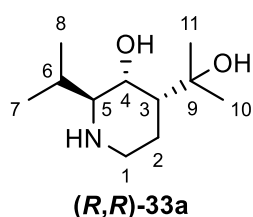

According to GP7B (*R,R*)-**33a** was prepared from (2*S*,3*R*,4*R*)-4-(2-hydroxypropan-2-yl)-2-isopropyl-1-((2-nitrophenyl)-sulfonyl)piperidin-3-ol (*R,R*)-**31a** (89 mg, 0.23 mmol), diisopropylethylamine (59 mg, 0.46 mmol) and thiophenol (63 mg, 0.58 mmol) as a colorless solid (22 mg, 0.11 mmol, 48 %). Purification was accomplished via column

chromatography on  $\text{SiO}_2$  with dichloromethane/methanol (5 : 1). mp 71  $^\circ\text{C}$ .  $[\alpha]_{\text{D}}^{20} + 6$  ( $c$  1.0 in  $\text{CHCl}_3$ ).  $R_f$  = 0.26 (dichloromethane/methanol, 5 : 1, anisaldehyde solution). FT-IR (ATR):  $\tilde{\nu}$  = 3288 (br, s), 2970 (vs), 1738 (w), 1585 (s), 1465 (m), 1396 (m), 1377 (m), 1278 (w), 1171 (m), 1097 (w), 1063 (w), 989 (m), 912 (w), 849 (w), 808 (w), 730 (m), 644 (w), 572 (w), 525 (w), 426 (w), 415 (w)  $\text{cm}^{-1}$ .  $^1\text{H-NMR}$  (500 MHz,  $\text{CDCl}_3$ )  $\delta$  1.01 (d,  $J$  = 6.4 Hz, 3H, 7-H/8-H), 1.21 (s, 3H, 10-H/11-H), 1.24 (d,  $J$  = 6.4 Hz, 3H, 8-H/7-H), 1.34 (s, 3H, 11-H/10-H), 1.42 – 1.50 (m, 1H, 3-H), 1.76 (d,  $J$  = 13.8 Hz, 1H, 2- $\text{H}_a$ ), 1.96 (dq,  $J$  = 10.8 Hz, 6.4 Hz, 1H, 6-H), 2.39 (dddd,  $J$  = 13.5 Hz, 13.5 Hz, 13.5 Hz, 4.5 Hz, 1H, 2- $\text{H}_b$ ), 2.90 (ddd,  $J$  = 13.5 Hz, 13.3 Hz, 3.3 Hz, 1H, 1- $\text{H}_a$ ), 3.31 (d,  $J$  = 10.8 Hz, 1H, 5-H), 3.49 – 3.59 (m, 1H, 1- $\text{H}_b$ ), 4.43 (s, br, 1H, OH), 4.49 (s, 1H, 4-H), 5.73 (s, br, 1H, OH).  $^{13}\text{C-NMR}$  (126 MHz,  $\text{CDCl}_3$ )  $\delta$  17.6 (C-2), 19.5 (C-7/C-8), 20.6 (C-8/C-7), 24.8 (C-6), 27.9 (C-10/C-11), 28.4 (C-11/C-10), 38.9 (C-1), 40.5 (C-3), 65.0 (C-5), 65.5 (C-4), 72.2 (C-9). HRMS (ESI): calc (found) for  $\text{C}_{11}\text{H}_{23}\text{NO}_2$  ( $[\text{M}+\text{H}]^+$ ): 202.1802 (202.1801).

**(2*R*,3*S*,4*S*)-4-(2-Hydroxypropan-2-yl)-2-isopropylpiperidin-3-ol ((*S,S*)-**33b**)**

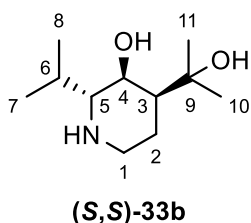

According to GP7B (*S,S*)-**33b** was prepared from (2*R*,3*S*,4*S*)-4-(2-hydroxypropan-2-yl)-2-isopropyl-1-((2-nitrophenyl)sulfonyl)-piperidin-3-ol (*S,S*)-**31b** (50.0 mg, 0.13 mmol), diisopropylethylamine (88.0  $\mu$ L, 67.0 mg, 0.52 mmol) and thiophenol (67.0  $\mu$ L, 72.0 mg, 0.65 mmol) as a colorless solid (15.0 mg, 0.07 mmol, 54 %).

Purification was accomplished via column chromatography on SiO<sub>2</sub> with dichloromethane/methanol (10 : 1). mp 75 °C.  $[\alpha]_D^{20}$  -27 (*c* 0.33 in CHCl<sub>3</sub>).  $R_f$  = 0.49 (dichloromethane/methanol, 5 : 1, ninhydrin solution). FT-IR (ATR):  $\tilde{\nu}$  = 3321 (br, s), 2968 (vs), 1585 (s), 1464 (s), 1395 (s), 1377 (s), 1309 (w), 1263 (m), 1169 (s), 1097 (m), 1076 (m), 1064 (m), 1007 (m), 988 (s), 911 (s), 849 (w), 834 (w), 807 (m), 729 (vs), 643 (s), 577 (m), 524 (s), 455 (m) cm<sup>-1</sup>. <sup>1</sup>H-NMR (500 MHz, CDCl<sub>3</sub>)  $\delta$  1.03 (d, *J* = 6.4 Hz, 3H, 7-H/8-H), 1.23 (s, 3H, 10-H/11-H), 1.20 – 1.26 (d, *J* = 6.4 Hz, 3H, 8-H/7-H), 1.36 (s, 3H, 11-H/10-H), 1.43 – 1.51 (m, 1H, 3-H), 1.72 – 1.82 (m, 1H, 2-H<sub>a</sub>), 1.97 (dq, *J* = 11.0 Hz, 6.4 Hz, 6.4 Hz, 1H, 6-H), 2.34 – 2.50 (m, 1H, 2-H<sub>b</sub>), 2.83 – 2.98 (m, 1H, 1-H<sub>a</sub>), 3.38 (d, *J* = 11.0 Hz, 1H, 5-H), 3.54 – 3.64 (m, 1H, 1-H<sub>b</sub>), 4.52 (s, 1H, 4-H), 8.34 (s, 1H, NH/OH), 8.80 (s, 1H, OH/NH). <sup>13</sup>C-NMR (126 MHz, CDCl<sub>3</sub>)  $\delta$  17.6 (C-2), 19.5 (C-7/C-8), 20.6 (C-8/C-7), 24.8 (C-6), 27.9 (C-10/C-11), 28.4 (C-11/C-10), 38.9 (C-1), 40.5 (C-3), 64.9 (C-5), 65.6 (C-4), 72.3 (C-9). HRMS (ESI): calc (found) for C<sub>11</sub>H<sub>23</sub>NO<sub>2</sub> ([M+H]<sup>+</sup>): 202.1802 (202.1802).

**(2*S*,3*R*,4*R*)-2-((*S*)-*sec*-Butyl)-4-(2-hydroxypropan-2-yl)piperidin-3-ol ((*R,R*)-**33e**)**

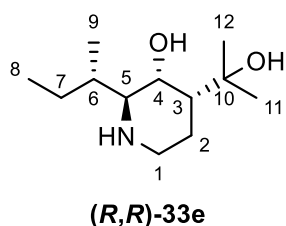

According to GP7B (*R,R*)-**33e** was prepared from (2*S*,3*R*,4*R*)-2-((*S*)-*sec*-butyl)-4-(2-hydroxypropan-2-yl)-1-((2-nitrophenyl)sulfonyl)-piperidin-3-ol (*R,R*)-**31e** (47.0 mg, 117  $\mu$ mol), diisopropylethylamine (80  $\mu$ L, 60 mg, 468 mmol) and thiophenol (59  $\mu$ L, 64 mg, 585 mmol) as a colorless solid (16.0 mg, 74.0  $\mu$ mol, 63 %). Purification was

accomplished via column chromatography on SiO<sub>2</sub> with dichloromethane/methanol (10 : 1  $\rightarrow$  5 : 1). mp 173 °C.  $[\alpha]_D^{20}$  -12 (*c* 0.5 in CHCl<sub>3</sub>).  $R_f$  = 0.35 (dichloromethane/methanol, 5 : 1, ninhydrin solution). FT-IR (ATR):  $\tilde{\nu}$  = 3337 (s, br), 2969 (vs), 2880 (s), 1588 (s), 1462 (s), 1382 (vs), 1283 (m), 1197 (m), 1164 (s), 1098 (m), 1066 (m), 983 (s), 953 (w), 912 (m), 838 (w), 809 (m), 785 (w), 730 (s), 643 (m), 557 (m), 499 (m) cm<sup>-1</sup>. <sup>1</sup>H-NMR (700 MHz, CDCl<sub>3</sub>)  $\delta$  0.94 (t, *J* = 7.4 Hz, 3H, 8-H), 0.97 (d, *J* = 6.7 Hz, 3H, 9-H), 1.22 (s, 3H, 11-H/12-H), 1.34 (s, 3H, 12-H/11-H), 1.34 – 1.40 (m, 1H, 7-H<sub>a</sub>), 1.45 – 1.50 (m, 1H, 3-H), 1.72 – 1.82 (m, 2H, 2-H<sub>a</sub>, 6-H), 1.82 – 1.91 (m, 1H, 7-H<sub>b</sub>), 2.37 (dddd, *J* = 13.8 Hz, 13.8 Hz, 13.8 Hz, 4.7 Hz, 1H, 2-H<sub>b</sub>),

2.85 – 2.97 (m, 1H, 1-H<sub>a</sub>), 3.39 (d,  $J$  = 11.0 Hz, 1H, 5-H), 3.49 – 3.57 (m, 1H, 1-H<sub>b</sub>), 4.45 – 4.55 (m, 1H, 4-H). <sup>13</sup>C-NMR (176 MHz, CDCl<sub>3</sub>)  $\delta$  10.2 (C-8), 15.0 (C-9), 17.6 (C-2), 25.3 (C-7), 27.9 (C-11/C-12), 28.3 (C-12/C-11), 30.3 (C-6), 38.9 (C-1), 40.4 (C-3), 63.0 (C-5), 65.5 (C-4), 72.2 (C-10). HRMS (ESI): calc (found) for C<sub>12</sub>H<sub>25</sub>NO<sub>2</sub> ([M+H]<sup>+</sup>): 216.1958 (216.1968).

**(2*S*,4*S*)-2-Isopropyl-1-((2-nitrophenyl)sulfonyl)-4-(prop-1-en-2-yl)piperidin-3-one**

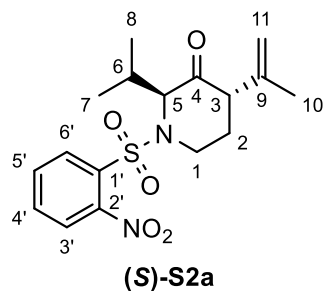

**((*S*)-S2a)**

According to GP5 (*S*)-S2a was prepared from (2*S*,3*R*,4*S*)-2-isopropyl-4-(prop-1-en-2-yl)-piperidin-3-ol (*R,S*)-30a (0.11 g, 0.30 mmol) and DMP (0.32 g, 0.75 mmol) as a colorless solid (0.118 g, 0.32 mmol, quant) without further purification. mp 112 °C.  $[\alpha]_D^{20} + 30$  ( $c$  1.0 in CHCl<sub>3</sub>).  $R_f$  = 0.50 (hexanes/EtOAc,

3 : 1, anisaldehyde solution). FT-IR (ATR):  $\tilde{\nu}$  = 3089 (w), 2967 (m), 2929 (w), 2874 (w), 1716 (s), 1650 (w), 1590 (w), 1543 (vs), 1467 (m), 1440 (m), 1369 (vs), 1302 (m), 1251 (w), 1195 (w), 1161 (vs), 1126 (m), 1091 (m), 1061 (m), 1040 (w), 999 (m), 981 (s), 905 (s), 852 (m), 778 (s), 761 (m), 739 (m), 729 (m), 675 (w), 655 (m), 585 (s), 535 (w), 466 (w) cm<sup>-1</sup>. <sup>1</sup>H-NMR (400 MHz, CDCl<sub>3</sub>)  $\delta$  0.89 (d,  $J$  = 6.7 Hz, 3H, 7-H/8-H), 0.95 (d,  $J$  = 6.7 Hz, 3H, 8-H/7-H), 1.54 (s, 3H, 10-H), 1.83 – 2.00 (m, 2H, 2-H), 2.22 (dq,  $J$  = 10.8 Hz, 6.7 Hz, 6.7 Hz, 1H, 6-H), 3.17 (dd,  $J$  = 12.5 Hz, 6.4 Hz, 1H, 3-H), 3.52 (ddd,  $J$  = 15.3 Hz, 12.3 Hz, 3.4 Hz, 1H, 1-H<sub>a</sub>), 3.88 (d,  $J$  = 10.8 Hz, 1H, 5-H), 4.11 – 4.19 (m, 1H, 1-H<sub>b</sub>), 4.63 (s, 1H, 11-H<sub>a</sub>), 4.90 (s, 1H, 11-H<sub>b</sub>), 7.56 – 7.64 (m, 1H, 3'-H), 7.64 – 7.73 (m, 2H, 4'-H, 5'-H), 7.95 – 8.02 (m, 1H, 6'-H). <sup>13</sup>C-NMR (176 MHz, CDCl<sub>3</sub>)  $\delta$  18.6 (C-7/C-8), 19.4 (C-8/C-7), 20.2 (C-10), 28.0 (C-6), 31.4 (C-2), 40.7 (C-1), 53.6 (C-3), 71.8 (C-5), 114.4 (C-11), 124.0 (C-3'), 130.9 (C-6'), 131.9 (C-5'), 133.5 (C-1'), 133.8 (C-4'), 141.3 (C-9), 147.8 (C-2'), 204.4 (C-4). HRMS (ESI): calc (found) for C<sub>17</sub>H<sub>22</sub>N<sub>2</sub>O<sub>5</sub>S ([M+H]<sup>+</sup>): 367.1322 (367.1324).

**(2*R*,4*R*)-2-Isopropyl-1-((2-nitrophenyl)sulfonyl)-4-(prop-1-en-2-yl)piperidin-3-one**

**((*R*)-S2b)**

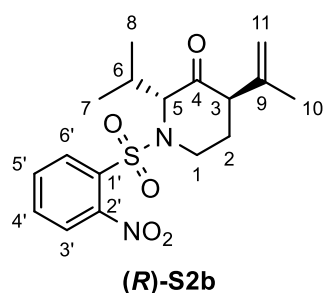

According to GP5 (*R*)-S2b was prepared from (2*R*,3*S*,4*R*)-2-isopropyl-1-((2-nitrophenyl)sulfonyl)-4-(prop-1-en-2-yl)-piperidin-3-ol (*S,R*)-30b (0.21 g, 0.56 mmol) and DMP (0.59 g, 1.40 mmol) as a colorless solid (0.17 g, 0.47 mmol, 84 %). Purification was accomplished via column chromatography on SiO<sub>2</sub> with hexanes/EtOAc (2 : 1). mp 124 °C.  $[\alpha]_D^{20} - 15$  ( $c$  1.0 in CHCl<sub>3</sub>).  $R_f$  = 0.51 (hexanes/EtOAc, 2 : 1, anisaldehyde solution). FT-IR (ATR):  $\tilde{\nu}$  = 3091 (w),

CHCl<sub>3</sub>).  $R_f$  = 0.51 (hexanes/EtOAc, 2 : 1, anisaldehyde solution). FT-IR (ATR):  $\tilde{\nu}$  = 3091 (w),

2927 (m), 2934 (w), 1717 (s), 1650 (w), 1590 (w), 1544 (vs), 1467 (m), 1440 (w), 1371 (vs), 1302 (w), 1195 (w), 1163 (vs), 1126 (m), 1091 (w), 1061 (w), 1040 (w), 981 (m), 905 (m), 852 (w), 778 (m), 761 (m), 740 (m), 728 (m), 675 (w), 655 (w), 585 (s)  $\text{cm}^{-1}$ .  $^1\text{H}$ -NMR (500 MHz,  $\text{CDCl}_3$ )  $\delta$  0.89 (d,  $J = 6.6$  Hz, 3H, 7-H/8-H), 0.94 (d,  $J = 6.6$  Hz, 3H, 8-H/7-H), 1.53 (s, 3H, 10-H), 1.89 (dddd,  $J = 12.6$  Hz, 12.6 Hz, 12.6 Hz, 4.7 Hz, 1H, 2- $\text{H}_a$ ), 1.91 – 1.99 (m, 1H, 2- $\text{H}_b$ ), 2.22 (dq,  $J = 10.7$  Hz, 6.6 Hz, 6.6 Hz, 1H, 6-H), 3.16 (dd,  $J = 12.6$  Hz, 6.4 Hz, 1H, 3-H), 3.52 (ddd,  $J = 15.2$  Hz, 12.6 Hz, 3.3 Hz, 1H, 1- $\text{H}_a$ ), 3.87 (d,  $J = 10.7$  Hz, 1H, 5-H), 4.11 – 4.19 (m, 1H, 1- $\text{H}_b$ ), 4.62 (s, 1H, 11- $\text{H}_a$ ), 4.90 (s, 1H, 11- $\text{H}_b$ ), 7.57 – 7.63 (m, 1H, 3'-H), 7.64 – 7.73 (m, 2H, 4'-H, 5'-H), 7.94 – 8.02 (m, 1H, 6'-H).  $^{13}\text{C}$ -NMR (126 MHz,  $\text{CDCl}_3$ )  $\delta$  18.6 (C-7/C-8), 19.4 (C-8/C-7), 20.2 (C-10), 28.0 (C-6), 31.5 (C-2), 40.8 (C-1), 53.6 (C-3), 71.8 (C-5), 114.4 (C-11), 124.0 (C-3'), 131.0 (C-6'), 131.9 (C-5'), 133.5 (C-1'), 133.8 (C-4'), 141.2 (C-9), 147.8 (C-2'), 204.4 (C-4). HRMS (ESI): calc (found) for  $\text{C}_{17}\text{H}_{22}\text{N}_2\text{O}_5\text{S}$  ( $[\text{M}+\text{Na}]^+$ ): 389.1142 (389.1143).

**(2*S*,4*S*)-2-Isobutyl-1-((2-nitrophenyl)sulfonyl)-4-(prop-1-en-2-yl)piperidin-3-one**  
**((*S*)-S2c)**

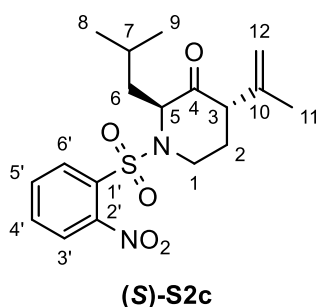

According to GP5 (*S*)-S2c was prepared from (2*S*,4*S*)-2-isobutyl-1-((2-nitrophenyl)sulfonyl)-4-(prop-1-en-2-yl)-piperidin-3-ol (*R,S*)-30c (60.0 mg, 0.16 mmol) and DMP (0.17 mg, 0.39 mmol) as a colorless solid (49.0 mg, 0.13 mmol, 82 %). Purification was accomplished via column chromatography on  $\text{SiO}_2$  with hexanes/EtOAc (2 : 1). mp 136 °C.  $[\alpha]_{\text{D}}^{20} + 38$  (c 1.0 in  $\text{CHCl}_3$ ).

$R_f = 0.32$  (hexanes/EtOAc, 3 : 1, anisaldehyde solution). FT-IR (ATR):  $\tilde{\nu} = 3091$  (w), 2958 (m), 2929 (w), 2871 (w), 1716 (s), 1650 (w), 1590 (w), 1542 (vs), 1468 (m), 1440 (m), 1369 (vs), 1297 (m), 1194 (w), 1160 (vs), 1126 (s), 1098 (m), 1061 (m), 1019 (m), 998 (w), 968 (s), 911 (s), 852 (m), 836 (w), 777 (m), 749 (s), 733 (s), 654 (m), 621 (w), 587 (vs), 573 (vs), 538 (w), 477 (w)  $\text{cm}^{-1}$ .  $^1\text{H}$ -NMR (500 MHz,  $\text{CDCl}_3$ )  $\delta$  0.87 (d,  $J = 6.1$  Hz, 3H, 8-H/9-H), 0.94 (d,  $J = 6.1$  Hz, 3H, 9-H/8-H), 1.55 (s, 3H, 11-H), 1.56 – 1.64 (m, 2H, 6- $\text{H}_a$ , 7-H), 1.66 – 1.76 (m, 1H, 6- $\text{H}_b$ ), 1.90 – 1.98 (m, 2H, 2-H), 3.18 – 3.24 (m, 1H, 3-H), 3.50 – 3.62 (m, 1H, 1- $\text{H}_a$ ), 4.03 – 4.11 (m, 1H, 1- $\text{H}_b$ ), 4.34 – 4.41 (m, 1H, 5-H), 4.67 (s, 1H, 12- $\text{H}_a$ ), 4.91 (s, 1H, 12- $\text{H}_b$ ), 7.62 – 7.66 (m, 1H, 3'-H'), 7.67 – 7.74 (m, 2H, 4'-H', 5'-H'), 8.03 – 8.06 (m, 1H, 6'-H').  $^{13}\text{C}$ -NMR (126 MHz,  $\text{CDCl}_3$ )  $\delta$  20.0 (C-11), 22.1 (C-8/C-9), 22.5 (C-9/C-8), 24.4 (C-7), 30.5 (C-2), 39.4 (C-6), 40.3 (C-1), 53.1 (C-3), 63.8 (C-5), 114.8 (C-12), 124.3 (C-3'), 131.1 (C-6'), 132.0 (C-5'), 133.4 (C-1'), 133.9 (C-4'), 141.4 (C-10), 147.9 (C-2'), 204.7 (C-4). HRMS (ESI): calc (found) for  $\text{C}_{18}\text{H}_{24}\text{N}_2\text{O}_5\text{S}$  ( $[\text{M}+\text{H}]^+$ ): 381.1479 (381.1474).

**(2*S*,4*S*)-2-Benzyl-1-((2-nitrophenyl)sulfonyl)-4-(prop-1-en-2-yl)piperidin-3-one ((*S*)-**S2f**)**

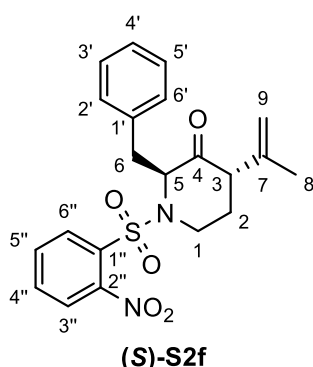

According to GP5 (*S*)-**S2f** was prepared from a mixture of (2*S*,3*R*,4*S*)-2-benzyl-1-((2-nitrophenyl)sulfonyl)-4-(prop-1-en-2-yl)piperidin-3-ol (*R,S*)-**30f** and (2*S*,3*S*,4*S*)-2-benzyl-1-((2-nitrophenyl)sulfonyl)-4-(prop-1-en-2-yl)piperidin-3-ol (*S,S*)-**30f** (0.10 g, 0.24 mmol) and DMP (0.25 g, 0.60 mmol) as a colorless solid (0.10 g, 0.24 mmol, quant). mp 178 °C.  $[\alpha]_D^{20} + 108$  (*c* 1.0 in CHCl<sub>3</sub>). *R*<sub>f</sub> = 0.24 (hexanes/EtOAc, 3 : 1, anisaldehyde solution).

FT-IR (ATR):  $\tilde{\nu}$  = 3087 (w), 3028 (w), 2930 (w), 2865 (w), 1717 (s), 1650 (w), 1590 (w), 1541 (vs), 1496 (w), 1455 (m), 1440 (m), 1368 (s), 1303 (m), 1251 (w), 1161 (vs), 1126 (s), 1100 (m), 1061 (m), 1030 (w), 1012 (w), 967 (s), 909 (m), 852 (m), 756 (s), 734 (s), 700 (s), 654 (m), 596 (s), 573 (s), 506 (w), 465 (w) cm<sup>-1</sup>. <sup>1</sup>H-NMR (500 MHz, CDCl<sub>3</sub>)  $\delta$  1.64 (s, 3H, 8-H), 1.98 (ddt, *J* = 13.4 Hz, 6.1 Hz, 2.7 Hz, 1H, 2-H<sub>a</sub>), 2.08 (ddt, *J* = 13.4 Hz, 12.6 Hz, 4.5 Hz, 1H, 2-H<sub>b</sub>), 3.05 (dd, *J* = 13.9 Hz, 6.2 Hz, 1H, 6-H<sub>a</sub>), 3.15 (dd, *J* = 13.9 Hz, 8.8 Hz, 1H, 6-H<sub>b</sub>), 3.19 (dd, *J* = 12.6 Hz, 6.1 Hz, 1H, 3-H), 3.57 (ddd, *J* = 14.6 Hz, 12.5 Hz, 2.6 Hz, 1H, 1-H<sub>a</sub>), 4.09 – 4.16 (m, 1H, 1-H<sub>b</sub>), 4.52 – 4.58 (m, 1H, 5-H), 4.73 (s, 1H, 9-H<sub>a</sub>), 4.90 – 4.96 (m, 1H, 9-H<sub>b</sub>), 7.04 – 7.16 (m, 5H, 2'-H, 3'-H, 4'-H, 5'-H, 6'-H), 7.50 – 7.56 (m, 1H, 5''-H), 7.56 – 7.65 (m, 2H, 3''-H, 4''-H), 7.76 – 7.82 (m, 1H, 6''-H). <sup>13</sup>C-NMR (126 MHz, CDCl<sub>3</sub>)  $\delta$  20.1 (C-8), 30.8 (C-2), 37.3 (C-6), 41.1 (C-1), 54.4 (C-3), 66.8 (C-5), 114.8 (C-9), 124.5 (C-3''), 127.1 (C-4'), 128.5 ((C-2', C-6')/(C-3', C-5')), 129.1 ((C-3', C-5')/(C-6', C-2')), 131.1 (C-6''), 132.0 (C-5''), 133.3 (C-1''), 133.6 (C-4''), 135.4 (C-1'), 141.4 (C-7), 147.4 (C-2''), 203.8 (C-4). HRMS (ESI): calc (found) for C<sub>21</sub>H<sub>22</sub>N<sub>2</sub>O<sub>5</sub>S ([M+NH<sub>4</sub>]<sup>+</sup>): 432.1588 (432.1588).

**GP8: Conversion to diols with terminal alcohol**

The reaction was performed according to the literature.<sup>[16]</sup> A round bottom flask was charged with a solution of the alkene (0.15 mmol) in tetrahydrofuran (2 mL) under nitrogen atmosphere. Upon cooling to 0 °C a solution of borane (1 M in THF) was added dropwise and the mixture was stirred for 20 h at room temperature. Potassium hydroxide solution (200  $\mu$ L, 0.60 mmol, 3 M in water) and hydrogen peroxide (2.0 mL, 0.60 mmol, 30 %) were added and stirring was continued for 10 min. Dichloromethane (17 mL) was added and the phases were separated. The aqueous phase was extracted with dichloromethane (3  $\times$  8 mL) and the organic phases were dried over sodium sulfate. The crude product was purified by HPLC.

**(2*S*,3*S*,4*S*)-4-((*R*)-1-Hydroxypropan-2-yl)-2-isopropyl-1-((2-nitrophenyl)sulfonyl)-piperidin-3-ol ((*S,S,R*)-**34a**) and (2*S*,3*S*,4*S*)-4-((*S*)-1-Hydroxypropan-2-yl)-2-isopropyl-1-((2-nitrophenyl)sulfonyl)piperidin-3-ol ((*S,S,S*)-**34a**)**

According to GP8 (*S,S,R*)-**34a** was prepared from (2*S*,4*S*)-2-isopropyl-1-((2-nitrophenyl)sulfonyl)-4-(prop-1-en-2-yl)piperidin-3-one (*S*)-**S2a** (33.0 mg, 90.0  $\mu$ mol), borane-THF-solution (0.12 mL, 0.12 mmol, 1 M in THF), hydrogen peroxide (1.2 mL, 0.36 mmol, 30 %) and potassium hydroxide (20.0 mg, 0.36 mmol) as a colorless solid (6.00 mg, 16.0  $\mu$ mol, 17 %). Diol (*S,S,S*)-**34a** was isolated as well as a colorless solid (8.00 mg, 21.0  $\mu$ mol, 23 %). Purification was accomplished by HPLC (Orbit, hexanes/isopropanol (95 : 5), 15 mL / min,  $R_t$  ((*S,S,R*)-**34a**) = 56.5 min,  $R_t$  ((*S,S,S*)-**34a**) = 93 min).

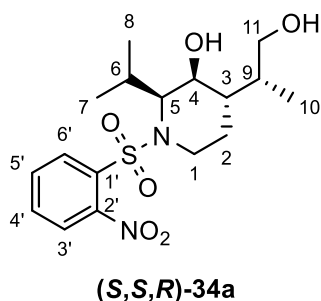

(*S,S,R*)-**34a**, mp 58 °C.  $[\alpha]_D^{20} + 96$  ( $c$  0.39 in  $\text{CHCl}_3$ ).  $R_f = 0.34$  (hexanes/EtOAc, 1 : 2, anisaldehyde solution). FT-IR (ATR):  $\tilde{\nu} = 3277$  (w, br), 2961 (m), 2930 (m), 2877 (m), 1590 (w), 1542 (vs), 1470 (m), 1440 (w), 1370 (s), 1344 (s), 1264 (w), 1204 (w), 1159 (vs), 1125 (m), 1079 (m), 1061 (m), 1017 (m), 993 (m), 953 (w), 911 (m), 884 (m), 852 (m), 778 (m), 764 (m), 730 (vs), 653 (m), 599 (vs), 571 (s), 530 (w)  $\text{cm}^{-1}$ .  $^1\text{H-NMR}$  (500 MHz,  $\text{CDCl}_3$ )  $\delta$  0.63 (d,  $J = 6.6$  Hz, 3H, 7-H/8-H), 0.87 (d,  $J = 7.3$  Hz, 3H, 10-H), 1.13 (d,  $J = 6.6$  Hz, 3H, 8-H, 7-H), 1.41 (dddd,  $J = 13.0$  Hz, 13.0 Hz, 13.0 Hz, 5.1 Hz 1H, 2- $\text{H}_a$ ), 1.52 – 1.63 (m, 1H, 2- $\text{H}_b$ ), 1.87 – 2.00 (m, 2H, 3-H, 9-H), 2.16 (dq,  $J = 9.8$  Hz, 6.6 Hz, 6.6 Hz, 1H, 6-H), 2.98 (ddd,  $J = 13.0$  Hz, 13.0 Hz, 2.8 Hz, 1H, 1- $\text{H}_a$ ), 3.54 (dd,  $J = 10.6$  Hz, 2.8 Hz, 1H, 11- $\text{H}_a$ ), 3.63 (dd,  $J = 10.6$  Hz, 6.3 Hz, 1H, 11- $\text{H}_b$ ), 3.71 (dd,  $J = 9.8$  Hz, 4.9 Hz, 1H, 5-H), 3.83 (dd,  $J = 10.9$  Hz, 4.9 Hz, 1H, 4-H), 3.88 – 3.97 (m, 1H, 1- $\text{H}_b$ ), 7.59 – 7.65 (m, 1H, 3'-H), 7.65 – 7.72 (m, 2H, 4'-H, 5'-H), 8.04 – 8.12 (m, 1H, 6'-H).  $^{13}\text{C-NMR}$  (126 MHz,  $\text{CDCl}_3$ )  $\delta$  12.2 (C-10), 20.5 (C-7/C-8), 22.1 (C-8/C-7), 25.7 (C-6), 28.8 (C-2), 37.0 (C-3), 40.4 (C-9), 41.4 (C-1), 63.7 (C-5), 66.1 (C-11), 72.4 (C-4), 124.1 (C-3'), 130.8 (C-6'), 131.8 (C-5'), 133.3 (C-4'), 134.6 (C-1'), 147.4 (C-2'). HRMS (ESI): calc (found) for  $\text{C}_{17}\text{H}_{26}\text{N}_2\text{O}_6\text{S}$  ( $[\text{M}+\text{Na}]^+$ ): 409.1404 (409.1404).

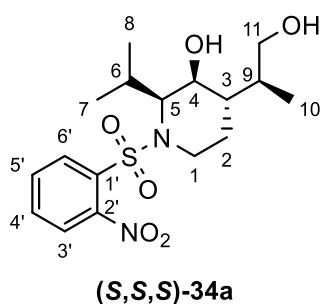

(*S,S,S*)-**34a**, mp 165 °C.  $[\alpha]_D^{20} + 130$  ( $c$  0.24 in  $\text{CHCl}_3$ ).  $R_f = 0.25$  (hexanes/EtOAc, 1 : 2, anisaldehyde solution). FT-IR (ATR):  $\tilde{\nu} = 3366$  (w, br), 2961 (m), 2878 (m), 1590 (w), 1544 (vs), 1471 (m), 1440 (w), 1372 (s), 1345 (s), 1267 (m), 1160 (s), 1125 (m), 1080 (m), 1024 (m), 985 (m), 946 (w), 912 (m), 891 (w), 852 (w), 764 (m), 736 (m), 653 (m), 600 (vs), 571 (m)  $\text{cm}^{-1}$ .  $^1\text{H-NMR}$  (500 MHz,

CDCl<sub>3</sub>)  $\delta$  0.66 (d,  $J$  = 6.6 Hz, 3H, 7-H/8-H), 0.77 (d,  $J$  = 6.9 Hz, 3H, 10-H), 1.14 (d,  $J$  = 6.6 Hz, 3H, 8-H/7-H), 1.29 (dddd,  $J$  = 13.0 Hz, 13.0 Hz, 13.0 Hz, 5.2 Hz, 1H, 2-H<sub>a</sub>), 1.54 – 1.62 (m, 1H, 2-H<sub>b</sub>), 1.95 – 2.13 (m, 4H, 3-H, 9-H, 2xOH), 2.19 (dq,  $J$  = 9.8 Hz, 6.6 Hz, 6.6 Hz, 1H, 6-H), 2.98 (ddd,  $J$  = 13.0 Hz, 13.0 Hz, 2.9 Hz, 1H, 1-H<sub>a</sub>), 3.47 (dd,  $J$  = 10.5 Hz, 7.8 Hz, 1H, 11-H<sub>a</sub>), 3.60 (dd,  $J$  = 10.5 Hz, 5.2 Hz, 1H, 11-H<sub>b</sub>), 3.70 (dd,  $J$  = 9.8 Hz, 4.9 Hz, 1H, 5-H), 3.85 (dd,  $J$  = 11.1 Hz, 4.9 Hz, 1H, 4-H), 3.87 – 3.95 (m, 1H, 1-H<sub>b</sub>), 7.58 – 7.64 (m, 1H, 3'-H), 7.64 – 7.73 (m, 2H, 4'-H, 5'-H), 8.02 – 8.10 (m, 1H, 6'-H). <sup>13</sup>C-NMR (126 MHz, CDCl<sub>3</sub>)  $\delta$  11.9 (C-10), 20.5 (C-7/C-8), 22.3 (C-8/C-7), 25.7 (C-6), 26.1 (C-2), 34.8 (C-9), 37.3 (C-3), 41.4 (C-1), 63.8 (C-5), 66.0 (C-11), 73.0 (C-4), 124.1 (C-3'), 130.7 (C-6'), 131.7 (C-5'), 133.2 (C-4'), 134.7 (C-1'), 147.5 (C-2'). HRMS (ESI): calc (found) for C<sub>17</sub>H<sub>26</sub>N<sub>2</sub>O<sub>6</sub>S ([M+Na]<sup>+</sup>): 409.1404 (409.1406).

**(2*S*,3*R*,4*S*)-4-((*S*)-1-Hydroxypropan-2-yl)-2-isopropyl-1-((2-nitrophenyl)sulfonyl)-piperidin-3-ol ((*R,S,S*)-**34a** und (2*S*,3*R*,4*S*)-4-((*R*)-1-Hydroxypropan-2-yl)-2-isopropyl-1-((2-nitrophenyl)sulfonyl)piperidin-3-ol ((*R,S,R*)-**34a**)**

According to GP8 (*R,S,S*)-**34a** was prepared from (2*S*,3*R*,4*S*)-2-isopropyl-1-((2-nitrophenyl)sulfonyl)-4-(prop-1-en-2-yl)-piperidin-3-ol (*R,S*)-**30a** (55.0 mg, 150  $\mu$ mol), borane-THF-solution (0.2 mL, 0.20 mmol, 1 M in THF), hydrogen peroxide (2.0 mL, 0.60 mmol, 30 %) and potassium hydroxide (34.0 mg, 0.60 mmol) as a colorless solid (18.0 mg, 47.0  $\mu$ mol, 31 %). Diol (*R,S,R*)-**34a** was isolated as well as a colorless solid (6.00 mg, 16.0  $\mu$ mol, 11 %). Purification was accomplished by HPLC (Orbit, hexanes/isopropanol (95 : 5), 15 mL / min,  $R_t$  ((*R,S,S*)-**34a**) = 122 min,  $R_t$  ((*R,S,R*)-**34a**) = 134 min).

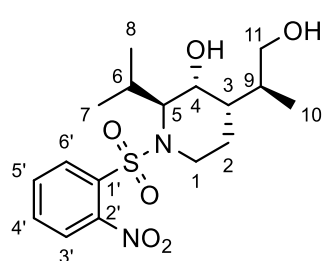

**(*R,S,S*)-34a**

(*R,S,S*)-**34a**, mp 138 °C. [ $\alpha$ ]<sub>D</sub><sup>20</sup> + 154 ( $c$  1.0 in CHCl<sub>3</sub>).  $R_f$  = 0.24 (hexanes/EtOAc, 1 : 2, anisaldehyde solution). FT-IR (ATR):  $\tilde{\nu}$  = 3539 (w), 3355 (w), 2964 (m), 2929 (m), 2877 (m), 1542 (vs), 1470 (m), 1439 (w), 1372 (s), 1335 (s), 1281 (w), 1207 (w), 1158 (s), 1125 (m), 1066 (m), 1044 (m), 970 (s), 913 (s), 853 (m), 778 (w), 751 (s), 734 (s), 685 (w), 663 (w), 651 (w), 620 (w), 578 (s), 560 (m) cm<sup>-1</sup>.

<sup>1</sup>H-NMR (500 MHz, CDCl<sub>3</sub>)  $\delta$  0.72 (d,  $J$  = 6.8 Hz, 3H, 7-H/8-H), 0.93 – 1.00 (m, 6H, 8-H/7-H, 10-H), 1.36 – 1.45 (m, 1H, 2-H<sub>a</sub>), 1.54 – 1.61 (m, 1H, 3-H), 1.61 – 1.69 (m, 1H, 9-H), 1.69 (dddd,  $J$  = 12.7 Hz, 12.7 Hz, 12.7 Hz, 4.9 Hz, 1H, 2-H<sub>b</sub>), 2.01 (dq,  $J$  = 11.0 Hz, 6.8 Hz, 6.8 Hz, 1H, 6-H), 2.84 (br, s, 2H, 2xOH), 3.10 (ddd,  $J$  = 15.3 Hz, 12.7 Hz, 2.7 Hz, 1H, 1-H<sub>a</sub>), 3.50 (dd,  $J$  = 11.2 Hz, 5.2 Hz, 1H, 11-H<sub>a</sub>), 3.55 (d,  $J$  = 11.0 Hz, 1H, 5-H), 3.65 (dd,  $J$  = 11.2 Hz, 3.0 Hz, 1H, 11-H<sub>b</sub>), 4.00 – 4.08 (m, 1H, 1-H<sub>b</sub>), 4.12 – 4.18 (m, 1H, 4-H), 7.52 – 7.59 (m, 1H, 3'-H), 7.61 – 7.70 (m, 2H, 4'-H, 5'-H), 8.08 – 8.16 (m, 1H, 6'-H). <sup>13</sup>C-NMR (126 MHz, CDCl<sub>3</sub>)  $\delta$  15.4

(C-10), 19.9 (C-7/C-8), 20.2 (C-8/C-7), 24.3 (C-2), 26.7 (C-6), 37.3 (C-9), 38.3 (C-3), 42.2 (C-1), 64.6 (C-11), 64.8 (C-4), 66.9 (C-5), 123.8 (C-3'), 131.0 (C-6'), 131.6 (C-5'), 133.3 (C-4'), 134.7 (C-1'), 147.7 (C-2'). HRMS (ESI): calc (found) for  $C_{17}H_{26}N_2O_6S$  ( $[M+H]^+$ ): 387.1584 (387.1586).

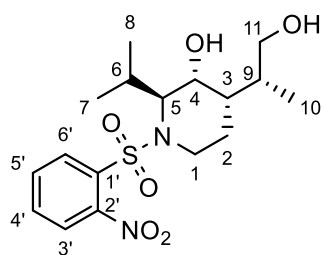

**(R,S,R)-34a**

**(R,S,R)-34a**, mp 41 °C.  $[\alpha]_D^{20} + 129$  ( $c$  1.0 in  $CHCl_3$ ).  $R_f = 0.24$  (hexanes/EtOAc, 1 : 2, anisaldehyde solution). FT-IR (ATR):  $\tilde{\nu} = 3547$  (w), 3345 (w), 2963 (m), 2927 (m), 2876 (m), 1543 (vs), 1469 (m), 1440 (w), 1372 (s), 1336 (s), 1281 (w), 1159 (s), 1125 (m), 1076 (m), 1046 (m), 995 (w), 967 (m), 912 (m), 853 (w), 778 (w), 751 (m), 734 (m), 652 (w), 581 (m), 560 (m)  $cm^{-1}$ .  $^1H$ -NMR (500 MHz,  $CDCl_3$ )

$\delta$  0.71 (d,  $J = 6.8$  Hz, 3H, 7-H/8-H), 0.96 (d,  $J = 6.8$  Hz, 3H, 8-H/7-H), 0.97 (d,  $J = 6.6$  Hz, 3H, 10-H), 1.43 – 1.54 (m, 1H, 2- $H_a$ ), 1.63 (dddd,  $J = 12.7$  Hz, 12.7 Hz, 12.7 Hz, 4.4 Hz, 1H, 2- $H_b$ ), 1.62 – 1.70 (m, 1H, 3-H), 1.70 – 1.80 (m, 1H, 9-H), 2.02 (dq,  $J = 10.7$  Hz, 6.8 Hz, 6.8 Hz, 1H, 6-H), 2.94 (s, br, 2H, 2xOH), 3.05 – 3.18 (m, 1H, 1- $H_a$ ), 3.45 (dd,  $J = 11.1$  Hz, 4.2 Hz, 1H, 11- $H_a$ ), 3.49 (dd,  $J = 11.1$  Hz, 6.4 Hz, 1H, 11- $H_b$ ), 3.53 (d,  $J = 10.7$  Hz, 1H, 5-H), 4.01 (s, 1H, 4-H), 4.04 – 4.13 (m, 1H, 1- $H_b$ ), 7.53 – 7.60 (m, 1H, 3'-H), 7.60 – 7.70 (m, 2H, 4'-H, 5'-H), 8.05 – 8.15 (m, 1H, 6'-H).  $^{13}C$ -NMR (126 MHz,  $CDCl_3$ )  $\delta$  16.3 (C-10), 19.8 (C-7/C-8), 20.3 (C-8/C-7), 21.4 (C-2), 26.7 (C-6), 37.6 (C-9), 38.1 (C-3), 42.3 (C-1), 64.5 (C-11), 67.1 (C-5), 67.1 (C-4), 123.8 (C-3'), 130.9 (C-6'), 131.6 (C-5'), 133.3 (C-4'), 134.7 (C-1'), 147.7 (C-2'). HRMS (ESI): calc (found) for  $C_{17}H_{26}N_2O_6S$  ( $[M+H]^+$ ): 387.1584 (387.1583).

**(2R,3R,4S)-4-((S)-1-Hydroxypropan-2-yl)-2-isopropyl-1-((2-nitrophenyl)sulfonyl)-piperidin-3-ol ((R,R,S)-34b)**, **(2R,3R,4R)-4-((R)-1-Hydroxypropan-2-yl)-2-isopropyl-1-((2-nitrophenyl)sulfonyl)-piperidin-3-ol ((R,R,R)-34b)** and **(2R,3S,4R)-4-((S)-1-Hydroxypropan-2-yl)-2-isopropyl-1-((2-nitrophenyl)sulfonyl)piperidin-3-ol ((S,R,S)-34b)**

According to GP8 **(R,R,S)-34b** was prepared from **(2R,4R)-2-isopropyl-1-((2-nitrophenyl)sulfonyl)-4-(prop-1-en-2-yl)-piperidin-3-one (R)-S2b** (0.15 g, 0.40 mmol), borane solution (0.54 mL, 0.54 mmol, 1 M in THF), potassium hydroxide (91 mg, 1.62 mmol) and hydrogen peroxide (5.4 mL, 1.62 mmol, 30 %) as a colorless oil (59.0 mg, 0.15 mmol, 38 %). Diol **(R,R,R)-34b** was isolated as a colorless solid (56.0 mg, 0.15 mmol, 36 %) and Diol **(S,R,S)-34b** was isolated as a colorless oil (12.0 mg, 31  $\mu$ mol, 8 %). Purification was accomplished by HPLC (Orbit, hexanes/EtOAc (40 : 60), 15 mL / min,  $R_t$  (**(R,R,S)-34b**) = 26 min,  $R_t$  (**(R,R,R)-34b**) = 32 min,  $R_t$  (**(S,R,S)-34b**) = 39.5 min).

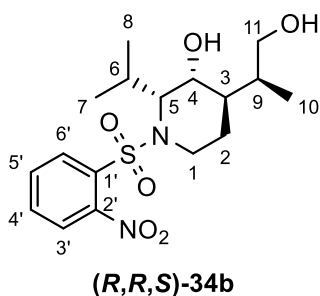

**(R,R,S)-34b**,  $[\alpha]_D^{20}$  - 119 (*c* 1.0 in  $\text{CHCl}_3$ ).  $R_f$  = 0.38 (hexanes/EtOAc, 1 : 2, anisaldehyde solution). FT-IR (ATR):  $\tilde{\nu}$  = 3276 (br, w), 2961 (m), 2877 (m), 1591 (w), 1542 (vs), 1470 (m), 1440 (w), 1370 (s), 1343 (s), 1262 (m), 1204 (w), 1158 (s), 1125 (m), 1079 (s), 1060 (m), 1017 (m), 992 (s), 953 (m), 910 (s), 884 (m), 852 (m), 778 (m), 764 (s), 728 (vs), 653 (m), 598 (vs), 570 (s),

530 (w)  $\text{cm}^{-1}$ .  $^1\text{H-NMR}$  (500 MHz,  $\text{CDCl}_3$ )  $\delta$  0.62 (d,  $J$  = 6.6 Hz, 3H, 7-H/8-H), 0.86 (d,  $J$  = 7.2 Hz, 3H, 10-H), 1.12 (d,  $J$  = 6.6 Hz, 3H, 8-H/7-H), 1.40 (dddd,  $J$  = 13.0 Hz, 13.0 Hz, 13.0 Hz, 5.2 Hz, 1H, 2- $\text{H}_a$ ), 1.52 – 1.61 (m, 1H, 2- $\text{H}_b$ ), 1.85 (br, s, 1H, OH), 1.88 – 1.97 (m, 2H, 3-H, 9-H), 2.15 (dq,  $J$  = 9.8 Hz, 6.6 Hz, 6.6 Hz, 1H, 6-H), 2.98 (ddd,  $J$  = 14.6 Hz, 13.0 Hz, 3.1 Hz, 1H, 1- $\text{H}_a$ ), 3.53 (dd,  $J$  = 10.6 Hz, 3.2 Hz, 1H, 11- $\text{H}_a$ ), 3.61 (dd,  $J$  = 10.6 Hz, 6.0 Hz, 1H, 11- $\text{H}_b$ ), 3.70 (dd,  $J$  = 9.8 Hz, 5.0 Hz, 1H, 5-H), 3.82 (dd,  $J$  = 11.1 Hz, 5.0 Hz, 1H, 4-H), 3.86 – 3.95 (m, 1H, 1- $\text{H}_b$ ), 7.58 – 7.64 (m, 1H, 3'-H), 7.64 – 7.71 (m, 2H, 4'-H, 5'-H), 8.03 – 8.10 (m, 1H, 6'-H).  $^{13}\text{C-NMR}$  (126 MHz,  $\text{CDCl}_3$ )  $\delta$  12.2 (C-10), 20.5 (C-7/C-8), 22.1 (C-8/C-7), 25.7 (C-6), 28.8 (C-2), 37.1 (C-3), 40.4 (C-9), 41.4 (C-1), 63.7 (C-5), 66.1 (C-11), 72.3 (C-4), 124.1 (C-3'), 130.8 (C-6'), 131.8 (C-5'), 133.3 (C-4'), 134.6 (C-1'), 147.4 (C-2'). HRMS (ESI): calc (found) for  $\text{C}_{17}\text{H}_{26}\text{N}_2\text{O}_6\text{S}$  ( $[\text{M}+\text{H}]^+$ ): 387.1584 (387.1585).

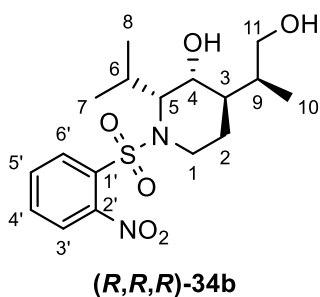

**(R,R,R)-34b**, mp 167 °C.  $[\alpha]_D^{20}$  - 107 (*c* 1.0 in  $\text{CHCl}_3$ ).  $R_f$  = 0.27 (hexanes/EtOAc, 1 : 2, anisaldehyde solution). FT-IR (ATR):  $\tilde{\nu}$  = 3366 (br, w), 2961 (m), 2878 (m), 1590 (w), 1543 (vs), 1471 (w), 1440 (w), 1372 (s), 1345 (s), 1268 (w), 1159 (s), 1125 (m), 1080 (m), 1024 (m), 1002 (m), 985 (m), 947 (w), 912 (m), 891 (w), 853 (w), 764 (m), 736 (m), 653 (m), 600 (vs), 571 (m)  $\text{cm}^{-1}$ .  $^1\text{H-NMR}$

(500 MHz,  $\text{CDCl}_3$ )  $\delta$  0.65 (d,  $J$  = 6.6 Hz, 3H, 7-H/8-H), 0.76 (d,  $J$  = 7.0 Hz, 3H, 10-H), 1.13 (d,  $J$  = 6.6 Hz, 3H, 8-H/7-H), 1.28 (dddd,  $J$  = 13.1 Hz, 13.1 Hz, 13.1 Hz, 5.0 Hz, 1H, 2- $\text{H}_a$ ), 1.53 – 1.60 (m, 1H, 2- $\text{H}_b$ ), 1.64 (s, 1H, OH), 1.95 – 2.11 (m, 2H, 3-H, 9-H), 2.18 (dq,  $J$  = 9.9 Hz, 6.6 Hz, 6.6 Hz, 1H, 6-H), 2.98 (ddd,  $J$  = 14.5 Hz, 13.1 Hz, 3.0 Hz, 1H, 1- $\text{H}_a$ ), 3.47 (dd,  $J$  = 10.5 Hz, 7.7 Hz, 1H, 11- $\text{H}_a$ ), 3.59 (dd,  $J$  = 10.5 Hz, 5.3 Hz, 1H, 11- $\text{H}_b$ ), 3.69 (dd,  $J$  = 9.9 Hz, 5.0 Hz, 1H, 5-H), 3.84 (dd,  $J$  = 11.1 Hz, 5.0 Hz, 1H, 4-H), 3.87 – 3.95 (m, 1H, 1- $\text{H}_b$ ), 7.57 – 7.64 (m, 1H, 3'-H), 7.64 – 7.71 (m, 2H, 4'-H, 5'-H), 8.00 – 8.10 (m, 1H, 6'-H).  $^{13}\text{C-NMR}$  (126 MHz,  $\text{CDCl}_3$ )  $\delta$  11.9 (C-10), 20.5 (C-7/C-8), 22.3 (C-8/C-7), 25.7 (C-2), 26.1 (C-6), 34.8 (C-9), 37.3 (C-3), 41.4 (C-1), 63.9 (C-5), 66.0 (C-11), 73.0 (C-4), 124.1 (C-3'), 130.7 (C-6'),

131.7 (C-5'), 133.2 (C-4'), 134.1 (C-1'), 147.5 (C-2'). HRMS (ESI): calc (found) for  $C_{17}H_{26}N_2O_6S$  ( $[M+H]^+$ ): 387.1584 (387.1589).

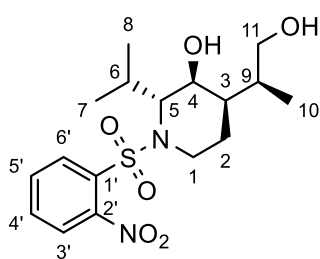

**(S,R,S)-34b**

**(S,R,S)-34b**,  $[\alpha]_D^{20}$  -129 ( $c$  0.62 in  $CHCl_3$ ).  $R_f$  = 0.22 (hexanes/EtOAc, 1 : 2, anisaldehyde solution). FT-IR (ATR):  $\tilde{\nu}$  = 3335 (br, w), 2961 (m), 2927 (m), 2876 (m), 1591 (w), 1542 (vs), 1468 (m), 1439 (w), 1371 (s), 1334 (s), 1281 (m), 1211 (w), 1157 (s), 1124 (s), 1075 (m), 1063 (m), 1045 (m), 994 (m), 966 (s), 910 (vs), 852 (m), 810 (w), 777 (m), 751 (s), 731 (vs), 687 (w), 651 (m),

628 (w), 580 (vs), 560 (s)  $cm^{-1}$ .  $^1H$ -NMR (500 MHz,  $CDCl_3$ )  $\delta$  0.70 (d,  $J$  = 6.6 Hz, 3H, 7-H/8-H), 0.95 (d,  $J$  = 7.0 Hz, 3H, 10-H), 0.96 (d,  $J$  = 6.6 Hz, 3H, 8-H/7-H), 1.40 – 1.52 (m, 1H, 2- $H_a$ ), 1.62 (dddd,  $J$  = 12.6 Hz, 12.6 Hz, 12.6 Hz, 4.5 Hz, 1H, 2- $H_b$ ), 1.62 – 1.70 (m, 1H, 3-H), 1.70 – 1.80 (m, 1H, 9-H), 2.02 (dq,  $J$  = 10.8 Hz, 6.6 Hz, 6.6 Hz, 1H, 6-H), 2.90 – 3.30 (m, 2H, 1- $H_a$ , OH), 3.44 (dd,  $J$  = 11.1 Hz, 4.4 Hz, 1H, 11- $H_a$ ), 3.47 (dd,  $J$  = 11.1 Hz, 6.6 Hz, 1H, 11- $H_b$ ), 3.51 – 3.57 (m, 1H, 5-H), 4.00 (s, 1H, 4-H), 4.02 – 4.10 (m, 1H, 1- $H_b$ ), 7.53 – 7.59 (m, 1H, 3'-H), 7.62 – 7.70 (m, 2H, 4'-H, 5'-H), 8.06 – 8.15 (m, 1H, 6'-H).  $^{13}C$ -NMR (126 MHz,  $CDCl_3$ )  $\delta$  16.3 (C-10), 19.8 (C-7/C-8), 20.3 (C-8/C-7), 21.3 (C-2), 26.7 (C-6), 37.6 (C-9), 38.2 (C-3), 42.3 (C-1), 64.4 (C-11), 67.0 (C-5), 67.1 (C-4), 123.8 (C-3'), 130.9 (C-6'), 131.6 (C-5'), 133.3 (C-4'), 134.7 (C-1'), 147.7 (C-2'). HRMS (ESI): calc (found) for  $C_{17}H_{26}N_2O_6S$  ( $[M+H]^+$ ): 387.1584 (387.1583).

**(2S,3S,4S)-4-((R)-1-Hydroxypropan-2-yl)-2-isobutyl-1-((2-nitrophenyl)sulfonyl)-piperidin-3-ol ((S,S,R)-34c) and (2S,3S,4S)-4-((S)-1-Hydroxypropan-2-yl)-2-isobutyl-1-((2-nitrophenyl)sulfonyl)piperidin-3-ol ((S,S,S)-34c)**

According to GP8 **(S,S,R)-34c** was prepared from **(2S,4S)-2-isobutyl-1-((2-nitrophenyl)sulfonyl)-4-(prop-1-en-2-yl)-piperidin-3-one (S)-S2c** (43.0 mg, 0.11 mmol), borane-THF-solution (0.15 mL, 1 M in THF, 0.15 mmol), potassium hydroxide (25.0 mg, 0.44 mmol) and hydrogen peroxide (1.46 mL, 30 % in water, 0.44 mmol) as a colorless solid (13.0 mg, 0.03 mmol, 20 %). Diol **(S,S,S)-34c** was isolated as well as a colorless solid (9.00 mg, 0.02 mmol, 29 %). Purification was accomplished by HPLC (Orbit, hexane/isopropanol (90 : 10), 15 mL / min,  $R_t$  (**(S,S,R)-34c**) = 35 min,  $R_t$  (**(S,S,S)-34c**) = 43 min).

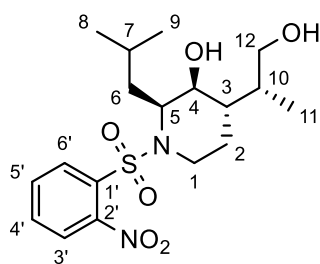

**(S,S,R)-34c**

(S,S,R)-**34c**, mp 48 °C.  $[\alpha]_D^{20} + 138$  (*c* 0.1 in CHCl<sub>3</sub>). *R<sub>f</sub>* = 0.26 (hexanes/EtOAc, 1 : 1, anisaldehyde solution). FT-IR (ATR):  $\tilde{\nu}$  = 2956 (m), 2924 (m), 2872 (m), 1543 (vs), 1467 (m), 1439 (w), 1371 (s), 1339 (s), 1268 (m), 1210 (w), 1161 (s), 1125 (m), 1067 (m), 1038 (m), 996 (m), 939 (m), 926 (m), 852 (m), 779 (w), 747 (m), 733 (m), 680 (w), 652 (w), 619 (w), 577 (m), 526 (w) cm<sup>-1</sup>. <sup>1</sup>H-NMR (500 MHz, CDCl<sub>3</sub>)  $\delta$  0.85 (d, *J* = 6.2 Hz, 3H, 8-H/9-H), 0.88 (d, *J* = 6.2 Hz, 3H, 9-H/8-H), 0.96 (d, *J* = 7.1 Hz, 3H, 11-H), 1.35 – 1.43 (m, 1H, 6-H<sub>a</sub>), 1.46 – 1.58 (m, 3H, 2-H<sub>a</sub>, 6-H<sub>b</sub>, 7-H), 1.60 – 1.69 (m, 2H, 2-H<sub>b</sub>, 3-H), 1.70 – 1.80 (m, 1H, 10-H), 3.13 – 3.23 (m, 1H, 1-H<sub>a</sub>), 3.47 (dd, *J* = 11.1 Hz, 4.4 Hz, 1H, 12-H<sub>a</sub>), 3.50 (dd, *J* = 11.1 Hz, 6.3 Hz, 1H, 12-H<sub>b</sub>), 3.70 – 3.75 (m, 1H, 4-H), 3.92 – 4.03 (m, 2H, 1-H<sub>b</sub>, 5-H), 7.57 – 7.64 (m, 1H, 3'-H), 7.64 – 7.71 (m, 2H, 4'-H, 5'-H), 8.10 – 8.16 (m, 1H, 6'-H). <sup>13</sup>C-NMR (126 MHz, CDCl<sub>3</sub>)  $\delta$  16.3 (C-11), 21.2 (C-2), 22.6 (C-8/C-9), 22.7 (C-9/C-8), 24.9 (C-3), 37.5 (C-10), 37.8 (C-7), 38.0 (C-6), 41.5 (C-1), 58.8 (C-5), 64.5 (C-12), 69.3 (C-4), 124.1 (C-3'), 131.1 (C-6'), 131.7 (C-5'), 133.4 (C-4'), 134.1 (C-1'), 147.8 (C-2'). HRMS (ESI): calc (found) for C<sub>18</sub>H<sub>24</sub>N<sub>2</sub>O<sub>5</sub>S ([M+H]<sup>+</sup>): 401.1741 (401.1742).

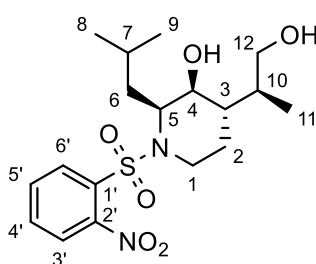

**(S,S,S)-34c**

(S,S,S)-**34c**, mp 172 °C.  $[\alpha]_D^{20} + 14$  (*c* 0.2 in CHCl<sub>3</sub>). *R<sub>f</sub>* = 0.21 (hexanes/EtOAc, 1 : 1, anisaldehyde solution). FT-IR (ATR):  $\tilde{\nu}$  = 3346 (m, br), 2956 (s), 2926 (s), 1545 (vs), 1467 (m), 1439 (m), 1372 (s), 1269 (m), 1163 (s), 1125 (m), 1079 (m), 1038 (m), 998 (w), 942 (m), 852 (w), 780 (w), 748 (m), 731 (m), 652 (w), 595 (s), 568 (m) cm<sup>-1</sup>. <sup>1</sup>H-NMR (500 MHz, CDCl<sub>3</sub>)  $\delta$  0.74 (d, *J* = 5.9 Hz, 3H, 8-H/9-H), 0.76 (d, *J* = 7.1 Hz, 3H, 11-H), 0.85 (d, *J* = 5.9 Hz, 3H, 9-H/8-H), 1.17 – 1.29 (m, 1H, 2-H<sub>a</sub>), 1.39 – 1.50 (m, 2H, 6-H<sub>a</sub>, 7-H), 1.52 – 1.61 (m, 2H, 2-H<sub>b</sub>, 6-H<sub>b</sub>), 1.80 – 1.89 (m, 1H, 3-H), 1.92 – 2.01 (m, 1H, 10-H), 3.05 – 3.15 (m, 1H, 1-H<sub>a</sub>), 3.47 (dd, *J* = 10.4 Hz, 7.8 Hz, 1H, 12-H<sub>a</sub>), 3.60 (dd, *J* = 10.4 Hz, 5.3 Hz, 1H, 12-H<sub>b</sub>), 3.72 (dd, *J* = 11.0 Hz, 5.4 Hz, 1H, 4-H), 3.79 – 3.86 (m, 1H, 1-H<sub>b</sub>), 4.05 – 4.13 (m, 1H, 5-H), 7.60 – 7.66 (m, 1H, 3'-H), 7.66 – 7.73 (m, 2H, 4'-H, 5'-H), 8.07 – 8.13 (m, 1H, 6'-H). <sup>13</sup>C-NMR (176 MHz, CDCl<sub>3</sub>)  $\delta$  12.1 (C-11), 21.4 (C-8/C-9), 24.0 (C-9/C-8), 24.2 (C-7), 25.8 (C-2), 32.8 (C-6), 35.2 (C-10), 37.3 (C-3), 40.1 (C-1), 56.5 (C-5), 66.1 (C-12), 70.4 (C-4), 124.3 (C-3'), 131.0 (C-6'), 131.7 (C-5'), 133.4 (C-4'), 134.4 (C-1'), 147.8 (C-2'). HRMS (ESI): calc (found) for C<sub>18</sub>H<sub>24</sub>N<sub>2</sub>O<sub>5</sub>S ([M+Na]<sup>+</sup>): 423.1560 (423.1562).

**(2*S*,3*S*,4*S*)-2-Benzyl-4-((*R*)-1-hydroxypropan-2-yl)-1-((2-nitrophenyl)sulfonyl)piperidin-3-ol ((*S*,*S*,*R*)-**34f**), (2*S*,3*R*,4*S*)-2-Benzyl-4-((*S*)-1-hydroxypropan-2-yl)-1-((2-nitrophenyl)sulfonyl)-piperidin-3-ol ((*R*,*S*,*S*)-**34f**), (2*S*,3*S*,4*S*)-2-Benzyl-4-((*S*)-1-hydroxypropan-2-yl)-1-((2-nitrophenyl)sulfonyl)piperidin-3-ol ((*S*,*S*,*S*)-**34f**) and (2*S*,3*R*,4*S*)-2-Benzyl-4-((*R*)-1-hydroxypropan-2-yl)-1-((2-nitrophenyl)sulfonyl)-piperidin-3-ol ((*R*,*S*,*R*)-**34f**)**

According to GP8 (*S*,*S*,*R*)-**34f** was prepared from (2*S*,4*S*)-2-benzyl-1-((2-nitrophenyl)sulfonyl)-4-(prop-1-en-2-yl)-piperidin-3-one (*S*)-**S2f** (0.16 g, 0.39 mmol), borane-solution (0.52 mL, 0.52 mmol, 1 M in THF), potassium hydroxide (88.0 mg, 1.56 mmol) and hydrogen peroxide (5.2 mL, 53.0 mg, 1.56 mmol, 30 %) as a colorless solid (35.0 mg, 31.0  $\mu$ mol, 21 %). Diols (*R*,*S*,*S*)-**34f**, (*S*,*S*,*S*)-**34f** and (*R*,*S*,*R*)-**34f** were isolated as well as colorless solids ((*R*,*S*,*S*)-**34f**, 5.00 mg, 12.0  $\mu$ mol, 3 %; (*S*,*S*,*S*)-**34f**, 26.0 mg, 60.0  $\mu$ mol, 15 %; (*R*,*S*,*R*)-**34f**, 17.0 mg, 39.0  $\mu$ mol, 10 %). Purification was accomplished by HPLC (Orbit, hexanes/EtOAc (40 : 60), 12 mL / min,  $R_t$  ((*S*,*S*,*R*)-**34f**) = 27 min,  $R_t$  ((*R*,*S*,*S*)-**34f**) = 30.5 min and Orbit, hexanes/isopropanol (90 : 10), 15 mL / min,  $R_t$  ((*S*,*S*,*S*)-**34f**) = 22 min,  $R_t$  ((*R*,*S*,*R*)-**34f**) = 45 min).

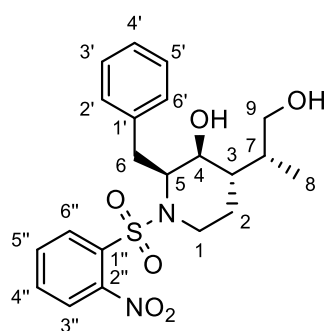

**(*S*,*S*,*R*)-**34f****

(*S*,*S*,*R*)-**34f**, mp 60 °C.  $[\alpha]_D^{20} + 158$  ( $c$  1.0 in  $\text{CHCl}_3$ ).  $R_f = 0.35$  (hexanes/EtOAc, 1 : 2, anisaldehyde solution). FT-IR (ATR):  $\tilde{\nu} = 3279$  (br, w), 3029 (w), 2937 (w), 2880 (w), 1592 (w), 1539 (vs), 1497 (w), 1455 (m), 1440 (m), 1366 (s), 1336 (s), 1263 (w), 1199 (w), 1157 (s), 1126 (s), 1067 (m), 1009 (m), 953 (s), 909 (s), 870 (m), 852 (m), 834 (w), 777 (w), 755 (s), 729 (vs), 699 (vs), 650 (m), 590 (vs), 570 (s), 503 (m), 462 (w)  $\text{cm}^{-1}$ .  $^1\text{H-NMR}$  (500 MHz,  $\text{CDCl}_3$ )  $\delta$  0.99 (d,  $J = 7.3$  Hz, 3H, 8-H), 1.59 (dddd,  $J = 12.9$  Hz, 12.9 Hz, 12.9 Hz, 4.9 Hz, 1H, 2- $\text{H}_a$ ), 1.64 – 1.71 (m, 1H, 2- $\text{H}_b$ ), 1.73 (s, br, 1H, OH), 1.90 – 2.02 (m, 2H, 3-H, 7-H), 2.78 (dd,  $J = 14.3$  Hz, 11.5 Hz, 1H, 6- $\text{H}_a$ ), 3.12 (dd,  $J = 14.3$  Hz, 3.1 Hz, 1H, 6- $\text{H}_b$ ), 3.29 – 3.38 (m, 1H, 1- $\text{H}_a$ ), 3.63 (dd,  $J = 10.5$  Hz, 3.1 Hz, 1H, 9- $\text{H}_a$ ), 3.74 (dd,  $J = 10.5$  Hz, 5.8 Hz, 1H, 9- $\text{H}_b$ ), 3.92 (dd,  $J = 11.0$  Hz, 5.5 Hz, 1H, 4-H), 3.96 – 4.03 (m, 1H, 1- $\text{H}_b$ ), 4.30 (ddd,  $J = 11.5$  Hz, 5.5 Hz, 3.1 Hz, 1H, 5-H), 6.82 – 6.92 (m, 3H, 3'-H, 4'-H, 5'-H), 6.96 – 7.03 (m, 2H, 2'-H, 6'-H), 7.21 – 7.28 (m, 1H, 5''-H), 7.31 – 7.38 (m, 1H, 6''-H), 7.40 – 7.50 (m, 2H, 3''-H, 4''-H).  $^{13}\text{C-NMR}$  (176 MHz,  $\text{CDCl}_3$ )  $\delta$  12.1 (C-8), 29.7 (C-2), 29.9 (C-6), 37.4 (C-7), 40.7 (C-1, C-3), 61.5 (C-5), 66.4 (C-9), 70.3 (C-4), 124.1 (C-3''), 126.2 (C-4'), 128.0 (C-3', C-5'), 129.2 (C-2', C-6'), 130.6 (C-6''), 131.9 (C-5''), 132.6 (C-4''), 134.1 (C-1''), 138.7 (C-1'), 147.0 (C-2''). HRMS (ESI): calc (found) for  $\text{C}_{21}\text{H}_{26}\text{N}_2\text{O}_6\text{S}$  ( $[\text{M}+\text{Na}]^+$ ): 457.1404 (457.1404).

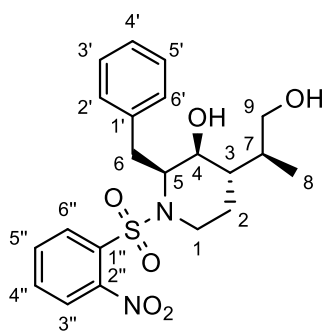

**(S,S,S)-34f**

(*S,S,S*)-**34f**, mp 183 °C.  $[\alpha]_D^{20} + 150$  (*c* 1.0 in CHCl<sub>3</sub>). *R*<sub>f</sub> = 0.29 (hexanes/EtOAc, 1 : 2, anisaldehyde solution). FT-IR (ATR):  $\tilde{\nu}$  = 3530 (w), 3365 (br, w), 3091 (w), 3027 (w), 2957 (m), 2930 (m), 2881 (w), 1591 (w), 1541 (vs), 1497 (w), 1454 (m), 1441 (m), 1371 (s), 1336 (s), 1268 (w), 1159 (vs), 1126 (m), 1074 (m), 1032 (m), 955 (s), 911 (m), 881 (w), 852 (m), 834 (w), 779 (w), 756 (s), 735 (s), 700 (m), 651 (w), 593 (s), 568 (m), 500 (w) cm<sup>-1</sup>. <sup>1</sup>H-NMR (500 MHz, CDCl<sub>3</sub>)  $\delta$  0.91 (d, *J* = 6.9 Hz, 3H, 8-H), 1.45 (dddd, *J* = 13.0 Hz, 13.0 Hz, 13.0 Hz, 4.9 Hz, 1H, 2-H<sub>a</sub>), 1.56 (s, 1H, OH), 1.70 – 1.77 (m, 1H, 2-H<sub>b</sub>), 1.95 – 2.10 (m, 2H, 3-H, 7-H), 2.81 (dd, *J* = 14.2 Hz, 11.3 Hz, 1H, 6-H<sub>a</sub>), 3.11 (dd, *J* = 14.2 Hz, 3.3 Hz, 1H, 6-H<sub>b</sub>), 3.28 – 3.37 (m, 1H, 1-H<sub>a</sub>), 3.56 (dd, *J* = 10.5 Hz, 7.8 Hz, 1H, 9-H<sub>a</sub>), 3.70 (dd, *J* = 10.5 Hz, 4.8 Hz, 1H, 9-H<sub>b</sub>), 3.94 (dd, *J* = 10.9 Hz, 5.4 Hz, 1H, 4-H), 3.96 – 4.02 (m, 1H, 1-H<sub>b</sub>), 4.29 (ddd, *J* = 11.3 Hz, 5.4 Hz, 3.3 Hz, 1H, 5-H), 6.84 – 6.94 (m, 3H, 3'-H, 4'-H, 5'-H), 6.98 – 7.04 (m, 2H, 2'-H, 6'-H), 7.26 – 7.31 (m, 1H, 5''-H), 7.35 – 7.41 (m, 1H, 6''-H), 7.42 – 7.50 (m, 2H, 3''-H, 4''-H). <sup>13</sup>C-NMR (126 MHz, CDCl<sub>3</sub>)  $\delta$  12.5 (C-8), 27.1 (C-2), 30.1 (C-6), 35.6 (C-7), 38.0 (C-3), 40.6 (C-1), 61.6 (C-5), 66.1 (C-9), 71.4 (C-4), 124.2 (C-3''), 126.3 (C-4'), 128.1 (C-3', C-5'), 129.2 (C-2', C-6'), 130.6 (C-6''), 131.8 (C-5''), 132.7 (C-4''), 134.1 (C-1''), 138.5 (C-1'), 147.2 (C-2''). HRMS (ESI): calc (found) for C<sub>21</sub>H<sub>26</sub>N<sub>2</sub>O<sub>6</sub>S ([M+H]<sup>+</sup>): 435.1584 (435.1584).

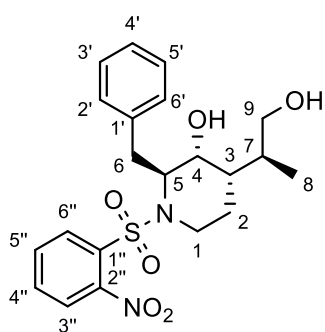

**(R,S,S)-34f**

(*R,S,S*)-**34f**, mp 53 °C.  $[\alpha]_D^{20} + 90$  (*c* 0.26 in CHCl<sub>3</sub>). *R*<sub>f</sub> = 0.33 (hexanes/EtOAc, 1 : 2, anisaldehyde solution). FT-IR (ATR):  $\tilde{\nu}$  = 3326 (br, w), 3087 (w), 3028 (w), 2957 (m), 2927 (m), 1731 (w), 1591 (w), 1542 (vs), 1495 (w), 1455 (m), 1440 (m), 1372 (s), 1338 (s), 1273 (w), 1160 (s), 1126 (m), 1066 (m), 1032 (m), 991 (m), 966 (w), 946 (m), 930 (m), 852 (m), 780 (w), 758 (m), 745 (m), 702 (m), 680 (w), 653 (w), 572 (m), 543 (w), 516 (w) cm<sup>-1</sup>. <sup>1</sup>H-NMR (500 MHz, CDCl<sub>3</sub>)  $\delta$  1.00 (d, *J* = 6.9 Hz, 3H, 8-H), 1.52 – 1.57 (m, 1H, 2-H<sub>a</sub>), 1.58 (s, br, 1H, OH), 1.66 – 1.75 (m, 1H, 7-H), 1.76 – 1.89 (m, 2H, 2-H<sub>b</sub>, 3-H), 2.24 (s, br, 1H, OH), 2.90 (dd, *J* = 13.5 Hz, 9.2 Hz, 1H, 6-H<sub>a</sub>), 2.99 (dd, *J* = 13.5 Hz, 6.6 Hz, 1H, 6-H<sub>b</sub>), 3.28 – 3.37 (m, 1H, 1-H<sub>a</sub>), 3.49 (dd, *J* = 11.0 Hz, 5.1 Hz, 1H, 9-H<sub>a</sub>), 3.63 (dd, *J* = 11.0 Hz, 3.0 Hz, 1H, 9-H<sub>b</sub>), 3.80 – 3.86 (m, 1H, 4-H), 3.96 – 4.04 (m, 1H, 1-H<sub>b</sub>), 4.17 – 4.24 (m, 1H, 5-H), 7.09 – 7.20 (m, 5H, 2'-H, 3'-H, 4'-H, 5'-H, 6'-H), 7.54 – 7.65 (m, 3H, 3''-H, 4''-H, 5''-H), 7.91 – 7.97 (m, 1H, 6''-H). <sup>13</sup>C-NMR (126 MHz, CDCl<sub>3</sub>)  $\delta$  15.3 (C-8), 24.3 (C-2), 35.8 (C-6), 37.1 (C-7), 37.9 (C-3), 41.9 (C-1), 62.2 (C-5), 64.6 (C-9), 65.5 (C-4), 124.3 (C-3''), 126.9 (C-

4'), 128.6 (C-2', C-6'), 129.1 (C-3', C-5'), 131.1 (C-6''), 131.9 (C-5''), 133.3 (C-4''), 134.0 (C-1''), 137.3 (C-1'), 147.6 (C-2''). HRMS (ESI): calc (found) for C<sub>21</sub>H<sub>26</sub>N<sub>2</sub>O<sub>6</sub>S ([M+Na]<sup>+</sup>): 457.1404 (457.1399).

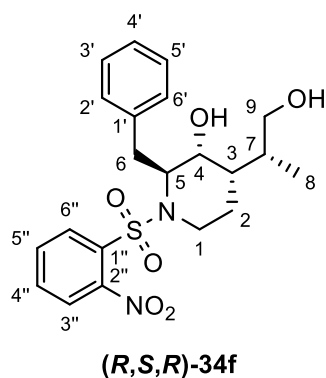

(*R,S,R*)-**34f**, mp 57 °C. [ $\alpha$ ]<sub>D</sub><sup>20</sup> + 60 (*c* 1.0 in CHCl<sub>3</sub>). *R*<sub>f</sub> = 0.26 (hexanes/EtOAc, 1 : 2, anisaldehyde solution). FT-IR (ATR):  $\tilde{\nu}$  = 3540 (w), 3304 (br, w), 3090 (w), 3027 (w), 2958 (m), 2928 (m), 2879 (w), 1591 (w), 1541 (vs), 1495 (w), 1455 (m), 1440 (w), 1371 (s), 1335 (s), 1272 (w), 1159 (vs), 1126 (m), 1066 (m), 1034 (m), 994 (m), 963 (m), 945 (m), 929 (m), 911 (m), 878 (w), 852 (m), 778 (w), 758 (m), 732 (vs), 701 (m), 680 (m), 651 (w), 616 (w), 574 (s), 543 (w) cm<sup>-1</sup>. <sup>1</sup>H-NMR (500 MHz, CDCl<sub>3</sub>)  $\delta$  0.95 (d, *J* = 7.0 Hz, 3H, 8-H), 1.52 – 1.64 (m, 1H, 2-H<sub>a</sub>), 1.70 – 1.82 (m, 2H, 2-H<sub>b</sub>, 7-H), 1.82 – 1.90 (m, 1H, 3-H), 2.89 (dd, *J* = 13.5 Hz, 8.5 Hz, 1H, 6-H<sub>a</sub>), 2.98 (dd, *J* = 13.5 Hz, 6.8 Hz, 1H, 6-H<sub>b</sub>), 3.26 – 3.36 (m, 1H, 1-H<sub>a</sub>), 3.50 (dd, *J* = 11.0 Hz, 4.4 Hz, 1H, 9-H<sub>a</sub>), 3.53 (dd, *J* = 11.0 Hz, 6.3 Hz, 1H, 9-H<sub>b</sub>), 3.68 – 3.74 (m, 1H, 4-H), 3.96 – 4.06 (m, 1H, 1-H<sub>b</sub>), 4.16 – 4.26 (m, 1H, 5-H), 7.07 – 7.13 (m, 3H, 2'-H, 4'-H, 6'-H), 7.13 – 7.20 (m, 2H, 3'-H, 5'-H), 7.50 – 7.56 (m, 1H, 5''-H), 7.56 – 7.64 (m, 2H, 3''-H, 4''-H), 7.83 – 7.91 (m, 1H, 6''-H). <sup>13</sup>C-NMR (126 MHz, CDCl<sub>3</sub>)  $\delta$  16.2 (C-8), 21.7 (C-2), 35.7 (C-6), 37.3 (C-7), 37.8 (C-3), 41.8 (C-1), 62.3 (C-5), 64.5 (C-9), 67.5 (C-4), 124.3 (C-3''), 126.9 (C-4'), 128.6 (C-2', C-6'), 129.0 (C-3', C-5'), 131.0 (C-6''), 131.9 (C-5''), 133.3 (C-4''), 133.9 (C-1''), 137.3 (C-1'), 147.6 (C-2''). HRMS (ESI): calc (found) for C<sub>21</sub>H<sub>26</sub>N<sub>2</sub>O<sub>6</sub>S ([M+H]<sup>+</sup>): 435.1584 (435.1585).

### GP9: Conversion to epoxides

The reaction was performed according to the literature.<sup>[17]</sup> A round bottom flask was charged with a solution of the alkene (0.27 mmol) in a mixture of isopropanol and water (20 mL, 4 : 1). *meta*-Chloroperbenzoic acid (71.0 mg, 0.41 mmol) was added and the mixture was stirred for 24 h at room temperature. Isopropanol was evaporated and the remaining mixture was extracted with ethyl acetate (2 × 60 mL). The organic phases were washed with saturated sodium thiosulfate solution (2 × 60 mL), sodium hydroxide solution (2 × 60 mL, 1 M) and brine (1 × 60 mL). They were dried over sodium sulfate and the solvents were evaporated. The crude product was purified by HPLC.

**(2*S*,3*R*,4*R*)-2-Isopropyl-4-((*S*)-2-methyloxiran-2-yl)-1-((2-nitrophenyl)sulfonyl)-piperidin-3-ol ((*R,R,S*)-**35a**) and (2*S*,3*R*,4*R*)-2-Isopropyl-4-((*R*)-2-methyloxiran-2-yl)-1-((2-nitrophenyl)sulfonyl)piperidin-3-ol ((*R,R,R*)-**35a**)**

According to GP9 (*R,R,S*)-**35a** was prepared from (2*S*,3*R*,4*S*)-2-isopropyl-1-((2-nitrophenyl)sulfonyl)-4-(prop-1-en-2-yl)-piperidin-3-ol (*R,S*)-**30a** (0.10 mg, 0.27 mmol) and *m*-chloroperbenzoic acid (71.0 mg, 0.41 mmol) as a yellow oil (42.0 mg, 0.11 mmol, 41 %). Epoxide (*R,R,R*)-**35a** was isolated as well as a yellow oil (55.0 mg, 0.14 mmol, 52 %). Purification was accomplished by HPLC (Orbit, hexanes/isopropanol (90 : 10), 15 mL / min,  $R_t$  ((*R,R,S*)-**35**) = 21.5 min,  $R_t$  ((*R,R,R*)-**35a**) = 24.5 min.

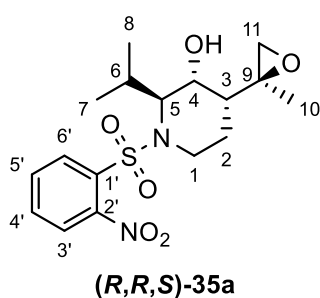

(*R,R,S*)-**35a**,  $[\alpha]_D^{20} + 108$  ( $c$  1.0 in  $\text{CHCl}_3$ ).  $R_f = 0.29$  (hexanes/EtOAc, 2 : 1, anisaldehyde solution). FT-IR (ATR):  $\tilde{\nu} = 3532$  (br, w), 2966 (m), 2939 (m), 1541 (vs), 1470 (m), 1440 (m), 1372 (s), 1337 (s), 1281 (m), 1258 (m), 1158 (vs), 1125 (s), 1081 (m), 1062 (m), 1046 (m), 969 (s), 909 (s), 852 (m), 778 (m), 751 (s), 731 (vs), 680 (m), 651 (m), 620 (m), 577 (vs), 559 (s)  $\text{cm}^{-1}$ .  $^1\text{H-NMR}$  (700 MHz,  $\text{CDCl}_3$ )  $\delta$  0.78 (d,  $J = 6.7$  Hz, 3H, 7-H/8-H), 0.98 (d,  $J = 6.7$  Hz, 3H, 8-H/7-H), 1.35 (s, 3H, 10-H), 1.38 – 1.42 (m, 1H, 2- $\text{H}_a$ ), 1.68 – 1.75 (m, 1H, 3-H), 1.74 (dddd,  $J = 12.7$  Hz, 12.7 Hz, 12.7 Hz, 4.6 Hz, 1H, 2- $\text{H}_b$ ), 1.94 (dq,  $J = 10.8$  Hz, 6.7 Hz, 6.7 Hz, 1H, 6-H), 2.52 (d,  $J = 4.4$  Hz, 1H, 11- $\text{H}_a$ ), 2.71 (d,  $J = 4.4$  Hz, 1H, 11- $\text{H}_b$ ), 2.74 (d,  $J = 3.3$  Hz, 1H, OH), 3.02 – 3.10 (m, 1H, 1- $\text{H}_a$ ), 3.57 (d,  $J = 10.8$  Hz, 1H, 5-H), 4.04 – 4.09 (m, 1H, 1- $\text{H}_b$ ), 4.17 – 4.21 (m, 1H, 4-H), 7.53 – 7.57 (m, 1H, 3'-H), 7.61 – 7.69 (m, 2H, 4'-H, 5'-H), 8.08 – 8.13 (m, 1H, 6'-H).  $^{13}\text{C-NMR}$  (176 MHz,  $\text{CDCl}_3$ )  $\delta$  19.9 (C-7/C-8), 20.2 (C-8/C-7), 20.6 (C-10), 21.1 (C-2), 26.4 (C-6), 39.4 (C-3), 41.4 (C-1), 51.9 (C-11), 59.0 (C-9), 66.2 (C-4), 66.8 (C-5), 123.6 (C-3'), 131.3 (C-5'), 131.4 (C-6'), 133.2 (C-4'), 134.7 (C-1'), 147.9 (C-2'). HRMS (ESI): calc (found) for  $\text{C}_{17}\text{H}_{24}\text{N}_2\text{O}_6\text{S}$  ( $[\text{M}+\text{NH}_4]^+$ ): 402.1693 (402.1695).

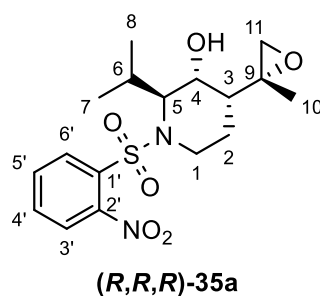

(*R,R,R*)-**35a**,  $[\alpha]_D^{20} + 94$  ( $c$  1.0 in  $\text{CHCl}_3$ ).  $R_f = 0.23$  (hexanes/EtOAc, 2 : 1, anisaldehyde solution). FT-IR (ATR):  $\tilde{\nu} = 3529$  (br, w), 2968 (m), 2933 (m), 2876 (w), 1542 (vs), 1470 (w), 1449 (w), 1372 (s), 1340 (s), 1278 (m), 1159 (vs), 1125 (m), 1079 (m), 1063 (m), 1046 (m), 971 (s), 912 (s), 852 (m), 778 (m), 749 (m), 732 (s), 680 (m), 651 (w), 614 (m), 577 (s), 559 (m)  $\text{cm}^{-1}$ .  $^1\text{H-NMR}$  (700 MHz,  $\text{CDCl}_3$ )  $\delta$  0.78 (d,  $J = 6.6$  Hz, 3H, 7-H/8-H), 0.98 (d,  $J = 6.6$  Hz, 3H, 8-H/7-H), 1.34 (s, 3H, 10-H), 1.47 – 1.53 (m, 1H, 2- $\text{H}_a$ ), 1.64 (dddd,  $J = 13.2$  Hz, 13.2 Hz,

13.2 Hz, 4.7 Hz, 1H, 2-H<sub>b</sub>), 1.86 – 1.91 (m, 1H, 3-H), 1.94 (dqq,  $J = 10.8$  Hz, 6.6 Hz, 6.6 Hz, 1H, 6-H), 2.57 (d,  $J = 4.3$  Hz, 1H, 11-H<sub>a</sub>), 2.82 (d,  $J = 2.6$  Hz, 1H, OH), 2.85 (d,  $J = 4.3$  Hz, 1H, 11-H<sub>b</sub>), 3.05 (ddd,  $J = 13.2$  Hz, 13.2 Hz, 2.5 Hz, 1H, 1-H<sub>a</sub>), 3.55 (d,  $J = 10.8$  Hz, 1H, 5-H), 4.03 – 4.10 (m, 2H, 1-H<sub>b</sub>, 4-H), 7.50 – 7.57 (m, 1H, 3'-H), 7.60 – 7.70 (m, 2H, 4'-H, 5'-H), 8.06 – 8.12 (m, 1H, 6'-H). <sup>13</sup>C-NMR (176 MHz, CDCl<sub>3</sub>)  $\delta$  19.8 (C-7/C-8), 20.3 (C-8/C-7), 20.4 (C-2), 20.7 (C-10), 26.4 (C-6), 38.5 (C-3), 41.6 (C-1), 52.0 (C-11), 58.7 (C-9), 65.6 (C-4), 66.7 (C-5), 123.6 (C-3'), 131.3 (C-5'), 131.3 (C-6'), 133.2 (C-4'), 134.7 (C-1'), 147.9 (C-2'). HRMS (ESI): calc (found) for C<sub>17</sub>H<sub>24</sub>N<sub>2</sub>O<sub>6</sub>S ([M+NH<sub>4</sub>]<sup>+</sup>): 402.1693 (402.1693).

**(2*R*,3*S*,4*S*)-2-Isopropyl-4-((*S*)-2-methyloxiran-2-yl)-1-((2-nitrophenyl)sulfonyl)-piperidin-3-ol ((*S,S,S*)-**35b**) and (2*R*,3*S*,4*S*)-2-Isopropyl-4-((*R*)-2-methyloxiran-2-yl)-1-((2-nitrophenyl)sulfonyl)piperidin-3-ol ((*S,S,R*)-**35b**)**

According to GP9 (*S,S,S*)-**35b** was prepared from (2*R*,3*S*,4*R*)-2-isopropyl-1-((2-nitrophenyl)sulfonyl)-4-(prop-1-en-2-yl)-piperidin-3-ol (*S,R*)-**30b** (0.22 g, 0.60 mmol) and *m*-chloroperbenzoic acid (0.16 g, 0.90 mmol) as a colorless solid (0.11 g, 0.28 mmol, 47 %). Epoxide (*S,S,R*)-**35b** was isolated as well as colorless solid (51.0 mg, 0.14 mmol, 23 %). Purification was accomplished by HPLC (Orbit, hexanes/isopropanol (95 : 5), 15 mL / min,  $R_t$  ((*S,S,S*)-**35b**) = 38 min,  $R_t$  ((*S,S,R*)-**35b**) = 47.5 min).

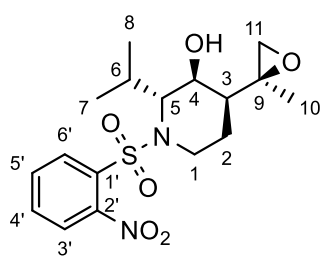

**(*S,S,S*)-35b**

(*S,S,S*)-**35b**, mp 120 °C.  $[\alpha]_D^{20} - 103$  ( $c$  1.0 in CHCl<sub>3</sub>).  $R_f = 0.16$  (hexanes/EtOAc, 2 : 1, anisaldehyde solution). FT-IR (ATR):  $\tilde{\nu} = 3524$  (br, w), 3097 (w), 2968 (m), 2933 (w), 1591 (w), 1543 (vs), 1470 (w), 1440 (w), 1373 (s), 1339 (s), 1281 (w), 1206 (w), 1160 (s), 1126 (m), 1082 (m), 1062 (m), 1046 (w), 970 (m), 911 (m), 852 (m), 816 (w), 779 (w), 751 (m), 733 (m), 680 (w), 652 (w), 620 (w), 578 (s), 560 (m) cm<sup>-1</sup>. <sup>1</sup>H-NMR (500 MHz, CDCl<sub>3</sub>)  $\delta$  0.78 (d,  $J = 6.6$  Hz, 3H, 7-H/8-H), 0.98 (d,  $J = 6.6$  Hz, 3H, 8-H/7-H), 1.35 (s, 3H, 10-H), 1.36 – 1.43 (m, 1H, 2-H<sub>a</sub>), 1.67 – 1.75 (m, 1H, 3-H), 1.75 (dddd,  $J = 13.0$  Hz, 13.0 Hz, 13.0 Hz, 4.9 Hz, 1H, 2-H<sub>b</sub>), 1.94 (dqq,  $J = 11.2$  Hz, 6.6 Hz, 6.6 Hz, 1H, 6-H), 2.53 (d,  $J = 4.5$  Hz, 1H, 11-H<sub>a</sub>), 2.71 (d,  $J = 4.5$  Hz, 1H, 11-H<sub>b</sub>), 2.74 (d,  $J = 3.1$  Hz, 1H, OH), 2.99 – 3.13 (m, 1H, 1-H<sub>a</sub>), 3.53 – 3.61 (m, 1H, 5-H), 4.02 – 4.10 (m, 1H, 1-H<sub>b</sub>), 4.17 – 4.24 (m, 1H, 4-H), 7.51 – 7.58 (m, 1H, 3'-H), 7.60 – 7.69 (m, 2H, 4'-H, 5'-H), 8.06 – 8.14 (m, 1H, 6'-H). <sup>13</sup>C-NMR (126 MHz, CDCl<sub>3</sub>)  $\delta$  19.9 (C-7/C-8), 20.2 (C-8/C-7), 20.6 (C-10), 21.1 (C-2), 26.4 (C-6), 39.4 (C-3), 41.5 (C-1), 51.9 (C-11), 59.0 (C-9), 66.2 (C-4), 66.8 (C-5), 123.7 (C-3'), 131.3 (C-6'), 131.4 (C-5'), 133.2 (C-4'), 134.7 (C-1'), 147.9 (C-2'). HRMS (ESI): calc (found) for C<sub>17</sub>H<sub>24</sub>N<sub>2</sub>O<sub>6</sub>S ([M+Na]<sup>+</sup>): 407.1247 (407.1249).

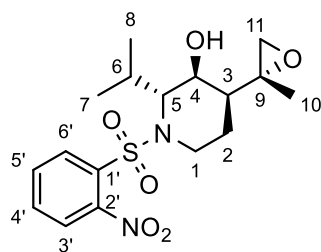

**(S,S,R)-35b**

(*S,S,R*)-**35b**, mp 49 °C.  $[\alpha]_D^{20}$  - 81 (*c* 1.0 in CHCl<sub>3</sub>).  $R_f$  = 0.14 (hexanes/EtOAc, 2 : 1, anisaldehyde solution). FT-IR (ATR):  $\tilde{\nu}$  = 3527 (br, w), 2967 (m), 2934 (w), 2877 (w), 1591 (w), 1542 (vs), 1470 (w), 1440 (w), 1372 (s), 1339 (s), 1277 (m), 1210 (w), 1159 (vs), 1125 (m), 1079 (m), 1063 (m), 1046 (m), 971 (s), 911 (s), 852 (m), 816 (w), 778 (m), 749 (s), 731 (s), 680 (m), 651 (m), 613 (m), 577 (s), 559 (s) cm<sup>-1</sup>. <sup>1</sup>H-NMR (500 MHz, CDCl<sub>3</sub>)  $\delta$  0.78 (d, *J* = 6.5 Hz, 3H, 7-H/8-H), 0.98 (d, *J* = 6.5 Hz, 3H, 8-H/7-H), 1.34 (s, 3H, 10-H), 1.45 – 1.53 (m, 1H, 2-H<sub>a</sub>), 1.64 (dddd, *J* = 13.1 Hz, 13.1 Hz, 13.1 Hz, 5.7 Hz, 1H, 2-H<sub>b</sub>), 1.85 – 1.92 (m, 1H, 3-H), 1.94 (dqq, *J* = 10.9 Hz, 6.5 Hz, 6.5 Hz, 1H, 6-H), 2.56 (d, *J* = 4.1 Hz, 1H, 11-H<sub>a</sub>), 2.83 (d, *J* = 3.1 Hz, 1H, OH), 2.85 (d, *J* = 4.1 Hz, 1H, 11-H<sub>b</sub>), 3.05 (ddd, *J* = 15.4 Hz, 13.1 Hz, 2.8 Hz, 1H, 1-H<sub>a</sub>), 3.52 – 3.59 (m, 1H, 5-H), 4.03 – 4.10 (m, 2H, 1-H<sub>b</sub>, 4-H), 7.50 – 7.57 (m, 1H, 3'-H), 7.59 – 7.67 (m, 2H, 4'-H, 5'-H), 8.06 – 8.15 (m, 1H, 6'-H). <sup>13</sup>C-NMR (126 MHz, CDCl<sub>3</sub>)  $\delta$  19.8 (C-7/C-8), 20.4 (C-8/C-7), 20.4 (C-10), 20.7 (C-2), 26.4 (C-6), 38.5 (C-3), 41.6 (C-1), 52.0 (C-11), 58.7 (C-9), 65.6 (C-4), 66.7 (C-5), 123.6 (C-3'), 131.3 (C-6'), 131.3 (C-5'), 133.2 (C-4'), 134.6 (C-1'), 147.9 (C-2'). HRMS (ESI): calc (found) for C<sub>17</sub>H<sub>24</sub>N<sub>2</sub>O<sub>6</sub>S ([M+NH<sub>4</sub>]<sup>+</sup>): 402.1693 (402.1697).

**(2*S*,3*R*,4*R*)-2-Benzyl-4-((*S*)-2-methyloxiran-2-yl)-1-((2-nitrophenyl)sulfonyl)-piperidin-3-ol ((*R,R,S*)-35f) and (2*S*,3*R*,4*R*)-2-Benzyl-4-((*R*)-2-methyloxiran-2-yl)-1-((2-nitrophenyl)sulfonyl)-piperidin-3-ol ((*R,R,R*)-35f)**

According to GP9 (*R,R,S*)-**35f** was prepared from (2*S*,3*R*,4*S*)-2-benzyl-1-((2-nitrophenyl)sulfonyl)-4-(prop-1-en-2-yl)-piperidin-3-ol (*R,S*)-**30f** (0.21 g, 0.51 mmol) and *m*-chlorperbenzoic acid (0.13 mg, 0.77 mmol) as a colorless solid (0.13 g, 0.29 mmol, 58 %). Epoxide (*R,R,R*)-**35f** was also isolated as a colorless solid (0.09 g, 0.20 mmol, 39 %). Purification was accomplished by HPLC (Orbit, hexanes/isopropanol (90 : 10), 15 mL / min,  $R_t$  ((*R,R,S*)-**35f**) = 21 min,  $R_t$  ((*R,R,R*)-**35f**) = 24 min.

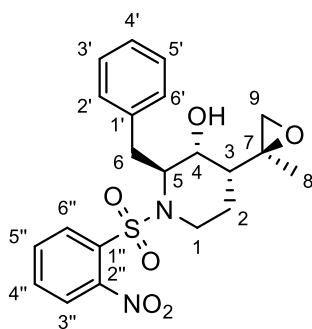

**(R,R,S)-35f**

(*R,R,S*)-**35f**, mp 173 °C.  $[\alpha]_D^{20}$  + 40 (*c* 0.1 in CHCl<sub>3</sub>).  $R_f$  = 0.57 (hexanes/EtOAc, 1 : 1, anisaldehyde solution). FT-IR (ATR):  $\tilde{\nu}$  = 3546 (w), 2957 (m), 2925 (s), 2854 (m), 1726 (m), 1543 (vs), 1495 (w), 1455 (m), 1374 (s), 1339 (s), 1269 (m), 1162 (s), 1127 (m), 1078 (m), 990 (w), 965 (w), 852 (w), 745 (m), 732 (m), 702 (m), 678 (w), 608 (w), 571 (m) cm<sup>-1</sup>. <sup>1</sup>H-NMR (700 MHz, CDCl<sub>3</sub>)  $\delta$  1.33 (s, 3H, 8-H), 1.51 – 1.54 (m, 1H, 2-H<sub>a</sub>), 1.86 – 1.95 (m, 2H, 2-H<sub>b</sub>, 3-H), 2.54 (dd, *J* = 4.3 Hz, 1H, 9-H<sub>a</sub>), 2.56 (d, *J* = 4.4 Hz, 1H, OH), 2.71 (d, *J* = 4.3 Hz, 1H, 9-H<sub>b</sub>), 2.85

(dd,  $J = 13.7$  Hz, 9.7 Hz, 1H, 6-H<sub>a</sub>), 3.01 (dd,  $J = 13.7$  Hz, 6.3 Hz, 1H, 6-H<sub>b</sub>), 3.27 – 3.34 (m, 1H, 1-H<sub>a</sub>), 3.85 – 3.88 (m, 1H, 4-H), 4.01 – 4.05 (m, 1H, 1-H<sub>b</sub>), 4.18 – 4.23 (m, 1H, 5-H), 7.12 – 7.18 (m, 3H, 2'-H, 4'-H, 6'-H), 7.19 – 7.23 (m, 2H, 3'-H, 5'-H), 7.55 – 7.59 (m, 1H, 5''-H), 7.60 – 7.65 (m, 2H, 3''-H, 4''-H), 7.95 – 7.99 (m, 1H, 6''-H). <sup>13</sup>C-NMR (176 MHz, CDCl<sub>3</sub>)  $\delta$  20.5 (C-8), 21.3 (C-2), 35.6 (C-6), 39.4 (C-3), 41.2 (C-1), 51.9 (C-9), 59.0 (C-7), 61.0 (C-5), 66.7 (C-4), 124.3 (C-3''), 127.0 (C-4'), 128.8 (C-3', C-5'), 128.9 (C-2', C-6'), 131.2 (C-6''), 131.8 (C-5''), 133.3 (C-4''), 134.0 (C-1''), 137.0 (C-1'), 147.7 (C-2''). HRMS (ESI): calc (found) for C<sub>21</sub>H<sub>24</sub>N<sub>2</sub>O<sub>6</sub>S ([M+Na]<sup>+</sup>): 455.1247 (455.1248).

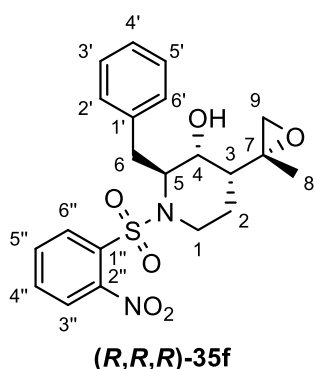

**(*R,R,R*)-35f**, mp 120 °C.  $[\alpha]_D^{20} + 30$  ( $c$  0.1 in CHCl<sub>3</sub>).  $R_f = 0.51$  (hexanes/EtOAc, 1 : 1, anisaldehyde solution). FT-IR (ATR):  $\tilde{\nu} = 3465$  (w), 3026 (w), 2926 (m), 2855 (w), 1722 (w), 1592 (w), 1542 (vs), 1495 (w), 1455 (m), 1372 (s), 1338 (s), 1271 (m), 1161 (vs), 1127 (m), 1078 (m), 1066 (m), 989 (m), 968 (m), 947 (m), 928 (m), 909 (m), 874 (w), 852 (m), 781 (w), 761 (m), 733 (s), 702 (m), 679 (m), 651 (w), 607 (m), 588 (m), 572 (m), 546 (w), 518 (w) cm<sup>-1</sup>. <sup>1</sup>H-NMR (500 MHz, CDCl<sub>3</sub>)  $\delta$  1.35 (s, 3H, 8-H), 1.58 – 1.65 (m, 1H, 2-H<sub>a</sub>), 1.77 (dddd,  $J = 13.3$  Hz, 4.7 Hz, 1H, 2-H<sub>b</sub>), 2.08 – 2.14 (m, 1H, 3-H), 2.56 (d,  $J = 4.3$  Hz, 1H, 9-H<sub>a</sub>), 2.60 (d,  $J = 4.3$  Hz, 1H, OH), 2.83 (d,  $J = 4.3$  Hz, 9-H<sub>b</sub>), 2.87 (dd,  $J = 13.8$  Hz, 9.2 Hz, 1H, 6-H<sub>a</sub>), 2.99 (dd,  $J = 13.8$  Hz, 6.5 Hz, 1H, 6-H<sub>b</sub>), 3.25 – 3.34 (m, 1H, 1-H<sub>a</sub>), 3.76 – 3.82 (m, 1H, 4-H), 3.99 – 4.07 (m, 1H, 1-H<sub>b</sub>), 4.16 – 4.23 (m, 1H, 5-H), 7.10 – 7.17 (m, 3H, 2'-H, 4'-H, 6'-H), 7.17 – 7.24 (m, 2H, 3'-H, 5'-H), 7.52 – 7.58 (m, 1H, 5''-H), 7.58 – 7.66 (m, 2H, 3''-H, 4''-H), 7.90 – 7.95 (m, 1H, 6''-H). <sup>13</sup>C-NMR (126 MHz, CDCl<sub>3</sub>)  $\delta$  20.5 (C-8), 20.8 (C-2), 35.7 (C-6), 38.5 (C-3), 41.4 (C-1), 51.8 (C-9), 58.3 (C-7), 62.0 (C-5), 66.1 (C-4), 124.2 (C-3''), 127.0 (C-4'), 128.7 (C-3', C-5'), 129.0 (C-2', C-6'), 131.1 (C-6''), 131.8 (C-5''), 133.3 (C-4''), 134.0 (C-1''), 137.1 (C-1'), 147.8 (C-2''). HRMS (ESI): calc (found) for C<sub>21</sub>H<sub>24</sub>N<sub>2</sub>O<sub>6</sub>S ([M+H]<sup>+</sup>): 433.1428 (433.1438).

**(2*S*,3*S*,4*R*)-2-Benzyl-4-((*R*)-2-methyloxiran-2-yl)-1-((2-nitrophenyl)sulfonyl)piperidin-3-ol ((*S,R,R*)-35f) and (2*S*,3*S*,4*R*)-2-Benzyl-4-((*S*)-2-methyloxiran-2-yl)-1-((2-nitrophenyl)sulfonyl)piperidin-3-ol ((*S,R,S*)-35f)**

According to GP9 (*S,R,R*)-**35f** was prepared from (2*S*,3*S*,4*S*)-2-benzyl-1-((2-nitrophenyl)sulfonyl)-4-(prop-1-en-2-yl)-piperidin-3-ol (*S,S*)-**30f** (55.0 mg, 0.13 mmol) and *m*-chloroperbenzoic acid (34.0 mg, 0.20 mmol) as a colorless solid (25.0 mg, 58.0 mmol, 44 %). Epoxide (*S,R,S*)-**35f** was isolated as well as a colorless solid (20.0 mg, 46.0 mmol, 35 %).

Purification was accomplished by HPLC (Orbit, hexanes/EtOAc (60 : 40), 15 mL / min,  $R_t$  ((*S,R,R*)-**35f**) = 24.5 min,  $R_t$  ((*S,R,S*)-**35f**) = 27 min.

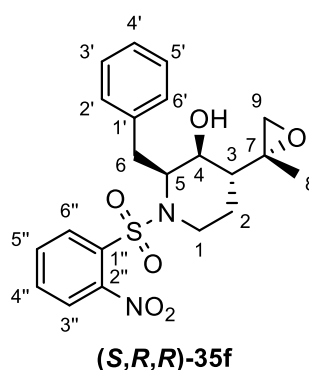

(*S,R,R*)-**35f**, mp 58 °C.  $[\alpha]_D^{20} = +203$  ( $c = 1.0$  in  $\text{CHCl}_3$ ).  $R_f = 0.43$  (hexanes/EtOAc, 1 : 1, anisaldehyde solution). FT-IR (ATR):  $\tilde{\nu} = 3448$  (br, w), 3026 (w), 2928 (w), 1592 (w), 1541 (vs), 1497 (w), 1454 (w), 1370 (s), 1333 (s), 1297 (m), 1256 (w), 1205 (w), 1159 (s), 1126 (m), 1086 (m), 1058 (m), 1013 (m), 957 (m), 943 (m), 911 (w), 853 (m), 832 (w), 811 (w), 779 (w), 756 (s), 740 (s), 700 (m), 652 (w), 592 (s), 573 (m), 512 (w)  $\text{cm}^{-1}$ .  $^1\text{H-NMR}$  (700 MHz,  $\text{CDCl}_3$ )  $\delta$  1.42 (s, 3H, 8-H), 1.52 (dddd,  $J = 13.3$  Hz, 13.3 Hz, 13.3 Hz, 4.9 Hz, 1H, 2- $\text{H}_a$ ), 1.93 – 1.99 (m, 1H, 2- $\text{H}_b$ ), 2.08 (ddd,  $J = 13.3$  Hz, 11.0 Hz, 4.0 Hz, 1H, 3-H), 2.71 (d,  $J = 3.7$  Hz, 1H, 9- $\text{H}_a$ ), 2.72 (dd,  $J = 14.4$  Hz, 11.7 Hz, 1H, 6- $\text{H}_a$ ), 3.05 (d,  $J = 3.7$  Hz, 1H, 9- $\text{H}_b$ ), 3.13 (dd,  $J = 14.4$  Hz, 3.2 Hz, 1H, 6- $\text{H}_b$ ), 3.36 (ddd,  $J = 14.6$  Hz, 13.3 Hz, 2.8 Hz, 1H, 1- $\text{H}_a$ ), 3.73 (s, 1H, OH), 3.75 (dd,  $J = 11.0$  Hz, 5.7 Hz, 1H, 4-H), 4.02 – 4.08 (m, 1H, 1- $\text{H}_b$ ), 4.24 (ddd,  $J = 11.7$  Hz, 5.7 Hz, 3.2 Hz, 1H, 5-H), 6.82 – 6.90 (m, 3H, 3'-H, 4'-H, 5'-H), 6.95 – 7.03 (m, 2H, 2'-H, 6'-H), 7.24 – 7.29 (m, 1H, 5''-H), 7.35 – 7.40 (m, 1H, 4''-H), 7.42 – 7.50 (m, 2H, 3''-H, 6''-H).  $^{13}\text{C-NMR}$  (176 MHz,  $\text{CDCl}_3$ )  $\delta$  20.9 (C-8), 29.0 (C-2), 29.8 (C-6), 40.1 (C-1), 41.3 (C-3), 51.7 (C-9), 60.1 (C-7), 60.4 (C-5), 70.0 (C-4), 124.3 (C-3''), 126.3 (C-4'), 128.0 (C-3', C-5'), 129.2 (C-2', C-6'), 130.7 (C-4''), 131.9 (C-5''), 132.7 (C-6''), 133.9 (C-1''), 138.3 (C-1'), 147.0 (C-2''). HRMS (ESI): calc (found) for  $\text{C}_{21}\text{H}_{24}\text{N}_2\text{O}_6\text{S}$  ( $[\text{M}+\text{Na}]^+$ ): 455.1247 (455.1244).

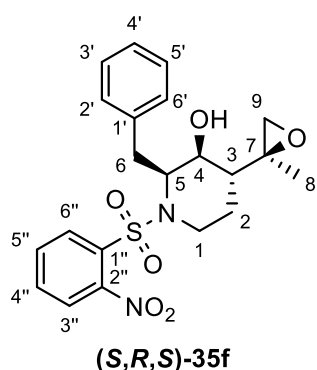

(*S,R,S*)-**35f**, mp 142 °C.  $[\alpha]_D^{20} = +220$  ( $c = 1.0$  in  $\text{CHCl}_3$ ).  $R_f = 0.31$  (hexanes/EtOAc, 1 : 1, anisaldehyde solution). FT-IR (ATR):  $\tilde{\nu} = 3481$  (br, w), 3089 (w), 3028 (w), 2925 (w), 1591 (w), 1541 (vs), 1497 (w), 1441 (w), 1370 (s), 1333 (s), 1294 (w), 1275 (w), 1250 (w), 1159 (s), 1126 (m), 1090 (m), 1073 (m), 1013 (w), 957 (m), 924 (m), 91 (m), 866 (w), 852 (m), 833 (w), 807 (w), 779 (w), 756 (s), 740 (s), 700 (m), 651 (w), 592 (s), 575 (m), 539 (w), 501 (w), 443 (w)  $\text{cm}^{-1}$ .  $^1\text{H-NMR}$  (700 MHz,  $\text{CDCl}_3$ )  $\delta$  1.36 (s, 3H, 8-H), 1.46 (ddd,  $J = 13.1$  Hz, 11.2 Hz, 3.9 Hz, 1H, 3-H), 1.65 (dddd,  $J = 13.1$  Hz, 13.1 Hz, 13.1 Hz, 4.9 Hz, 1H, 2- $\text{H}_a$ ), 1.77 – 1.83 (m, 1H, 2- $\text{H}_b$ ), 2.60 (d,  $J = 4.4$  Hz, 1H, 9- $\text{H}_a$ ), 2.65 (dd,  $J = 14.1$  Hz, 11.5 Hz, 1H, 6- $\text{H}_a$ ), 2.66 (d,  $J = 4.4$  Hz, 1H, 9- $\text{H}_b$ ), 3.12 (dd,  $J = 14.1$  Hz, 3.0 Hz, 1H, 6- $\text{H}_b$ ), 3.12 (s, br, 1H, OH), 3.29 – 3.36 (m, 1H, 1- $\text{H}_a$ ), 4.02 – 4.10 (m, 1H, 1- $\text{H}_b$ ), 4.19 (ddd,  $J = 11.2$  Hz, 5.5 Hz, 2.3 Hz, 1H, 4-H), 4.32 (ddd,  $J = 11.5$  Hz, 5.5 Hz, 3.0 Hz, 1H, 5-H), 6.81 – 6.89 (m, 3H, 3'-H, 4'-H, 5'-H), 6.94 – 7.00 (m,

2H, 2'-H, 6'-H), 7.25 – 7.30 (m, 1H, 5''-H), 7.37 – 7.42 (m, 1H, 4''-H), 7.42 – 7.49 (m, 2H, 3''-H, 6''-H). <sup>13</sup>C-NMR (176 MHz, CDCl<sub>3</sub>) δ 16.3 (C-8), 28.8 (C-2), 29.6 (C-6), 40.0 (C-1), 44.2 (C-3), 52.6 (C-9), 58.5 (C-7), 60.8 (C-5), 71.1 (C-4), 124.3 (C-3''), 126.3 (C-4'), 128.0 (C-3', C-5'), 129.2 (C-2', C-6'), 130.8 (C-4''), 132.0 (C-5''), 132.7 (C-6''), 134.0 (C-1''), 138.2 (C-1'), 146.9 (C-2''). HRMS (ESI): calc (found) for C<sub>21</sub>H<sub>24</sub>N<sub>2</sub>O<sub>6</sub>S ([M+Na]<sup>+</sup>): 455.1247 (455.1245).

#### GP10: Conversion to triols

The reaction was performed according to the literature.<sup>[17]</sup> A round bottom flask was charged with a solution of the alkene (0.09 mmol) in a mixture of tetrahydrofuran and water (8 mL, 4 : 1) under nitrogen atmosphere. Upon cooling to 0 °C perchloric acid solution (1.25 mL, 7 %) was added and the mixture was stirred for 24 h at room temperature. Afterwards the mixture was neutralized using sodium hydroxide solution (1 M) and extracted with ethyl acetate (3 × 14 mL). The organic phases were washed with brine (2 × 9 mL) and dried over sodium sulfate. The solvents were evaporated and the crude product was purified by HPLC.

**(*R*)-2-((2*S*,3*R*,4*R*)-3-Hydroxy-2-isopropyl-1-((2-nitrophenyl)sulfonyl)piperidin-4-yl)-propane-1,2-diol ((*R,R,R*)-36a) und (*S*)-2-((2*S*,3*R*,4*R*)-3-Hydroxy-2-isopropyl-1-((2-nitrophenyl)-sulfonyl)piperidin-4-yl)propane-1,2-diol ((*R,R,S*)-36a)**

According to GP10 (*R,R,R*)-36a was prepared from (2*S*,3*R*,4*R*)-2-isopropyl-4-((*S*)-2-methyloxiran-2-yl)-1-((2-nitrophenyl)-sulfonyl)piperidin-3-ol (*R,R,S*)-35a (33.0 mg, 90.0 μmol) and perchloric acid (1.3 mL, 1.54 mmol, 7 % in water) as a colorless solid (1.00 mg, 2.48 μmol, 3 %). Triol (*R,R,S*)-36a was isolated as well as a colorless solid (15.0 mg, 37.0 μmol, 41 %). Purification was accomplished by HPLC (Orbit, hexanes/isopropanol (85 : 15), 15 mL / min, *R*<sub>t</sub> ((*R,R,R*)-36a) = 47 min, *R*<sub>t</sub> ((*R,R,S*)-36a) = 51 min).

Both triols were also obtained according to GP9 starting from (2*S*,3*R*,4*R*)-2-isopropyl-4-((*R*)-2-methyloxiran-2-yl)-1-((2-nitrophenyl)-sulfonyl)piperidin-3-ol (*R,R,R*)-35a (49.0 mg, 0.13 mmol) and perchloric acid (1.8 mL, 2.22 mmol, 7 % in water): Triol (*R,R,R*)-36a (11.0 mg, 27.0 μmol, 21 %), triol (*R,R,S*)-36a (2.00 mg, 4.97 μmol, 4 %). Purification was accomplished by HPLC (Orbit, hexanes/isopropanol (85 : 15), 15 mL / min).

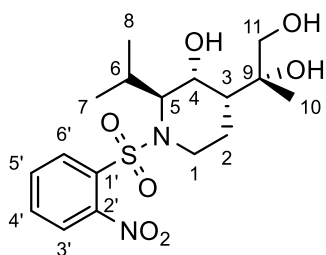

**(*R,R,R*)-36a**

(*R,R,R*)-**36a**, mp 50 °C.  $[\alpha]_D^{20} + 141$  ( $c$  1.0 in  $\text{CHCl}_3$ ).  $R_f = 0.12$  (hexanes/EtOAc, 1 : 2, anisaldehyde solution). FT-IR (ATR):  $\tilde{\nu} = 3382$  (br, w), 2967 (m), 2933 (m), 1542 (vs), 1469 (m), 1440 (m), 1371 (s), 1332 (s), 1279 (m), 1158 (vs), 1125 (s), 1085 (m), 1064 (s), 1045 (s), 997 (w), 970 (s), 911 (s), 852 (m), 806 (w), 776 (m), 751 (s), 732 (vs), 688 (w), 652 (m), 580 (s), 560 (m)  $\text{cm}^{-1}$ .  $^1\text{H-NMR}$  (700 MHz,  $\text{CDCl}_3$ )  $\delta$  0.65 (d,  $J = 6.7$  Hz, 3H, 7-H/8-H), 0.97 (d,  $J = 6.7$  Hz, 3H, 8-H/7-H), 1.22 (s, 3H, 10-H), 1.45 – 1.50 (m, 1H, 2- $\text{H}_a$ ), 1.62 (s, br, 1H, OH), 1.67 – 1.72 (m, 1H, 3-H), 1.82 (dddd,  $J = 13.0$  Hz, 13.0 Hz, 13.0 Hz, 4.9 Hz, 1H, 2- $\text{H}_b$ ), 1.99 (dq,  $J = 10.8$  Hz, 6.7 Hz, 6.7 Hz, 1H, 6-H), 3.08 – 3.15 (m, 1H, 1- $\text{H}_a$ ), 3.26 (d,  $J = 11.5$  Hz, 1H, 11- $\text{H}_a$ ), 3.36 (s, br, 1H, OH), 3.51 (d,  $J = 10.8$  Hz, 1H, 5-H), 3.55 (d,  $J = 11.5$  Hz, 1H, 11- $\text{H}_b$ ), 4.08 – 4.15 (m, 1H, 1- $\text{H}_b$ ), 4.37 (s, 1H, 4-H), 7.56 – 7.63 (m, 1H, 3'-H), 7.64 – 7.73 (m, 2H, 4'-H, 5'-H), 8.04 – 8.12 (m, 1H, 6'-H).  $^{13}\text{C-NMR}$  (176 MHz,  $\text{CDCl}_3$ )  $\delta$  19.7 (C-7/C-8), 20.1 (C-8/C-7), 20.9 (C-2), 24.8 (C-10), 26.7 (C-6), 41.9 (C-1), 42.1 (C-3), 65.2 (C-4), 66.5 (C-11), 67.0 (C-5), 73.0 (C-9), 124.0 (C-3'), 130.8 (C-6'), 131.8 (C-5'), 133.5 (C-4'), 134.5 (C-1') 147.6 (C-2'). HRMS (ESI): calc (found) for  $\text{C}_{17}\text{H}_{26}\text{N}_2\text{O}_7\text{S}$  ( $[\text{M}+\text{H}]^+$ ): 403.1533 (403.1543).

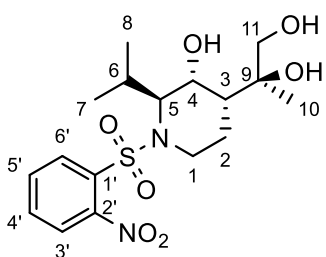

**(*R,R,S*)-36a**

(*R,R,S*)-**36a**, mp 50 °C.  $[\alpha]_D^{20} = + 132$  ( $c = 1.0$  in  $\text{CHCl}_3$ ).  $R_f = 0.09$  (hexanes/EtOAc, 1 : 2, anisaldehyde solution). FT-IR (ATR):  $\tilde{\nu} = 3382$  (br, w), 2967 (m), 2929 (m), 1542 (vs), 1466 (m), 1440 (m), 1371 (s), 1334 (s), 1277 (m), 1156 (s), 1124 (s), 1092 (m), 1063 (m), 1047 (s), 995 (w), 973 (s), 910 (vs), 853 (m), 807 (w), 776 (m), 751 (s), 731 (vs), 685 (m), 652 (m), 579 (s), 560 (s)  $\text{cm}^{-1}$ .  $^1\text{H-NMR}$  (700 MHz,  $\text{CDCl}_3$ )  $\delta$  0.69 (d,  $J = 6.6$  Hz, 3H, 7-H/8-H), 0.97 (d,  $J = 6.6$  Hz, 3H, 8-H/7-H), 1.17 (s, 3H, 10-H), 1.52 – 1.59 (m, 1H, 2- $\text{H}_a$ ), 1.71 – 1.78 (m, 1H, 3-H), 1.92 (dddd,  $J = 13.4$  Hz, 13.4 Hz, 13.4 Hz, 4.9 Hz, 1H, 2- $\text{H}_b$ ), 1.98 (dq,  $J = 10.7$  Hz, 10.7 Hz, 6.6 Hz, 1H, 6-H), 2.07 (s, br, 1H, OH), 3.08 – 3.18 (m, 1H, 1- $\text{H}_a$ ), 3.34 (s, br, 2H, 2xOH), 3.47 (d,  $J = 10.7$  Hz, 1H, 5-H), 3.57 (s, 2H, 11-H), 4.11 – 4.18 (m, 1H, 1- $\text{H}_b$ ), 4.40 (s, 1H, 4-H), 7.53 – 7.62 (m, 1H, 3'-H), 7.62 – 7.73 (m, 2H, 4'-H, 5'-H), 8.03 – 8.10 (m, 1H, 6'-H).  $^{13}\text{C-NMR}$  (176 MHz,  $\text{CDCl}_3$ )  $\delta$  19.5 (C-2), 19.7 (C-7/C-8), 20.2 (C-8/C-7), 23.1 (C-10), 26.5 (C-6), 38.9 (C-3), 42.0 (C-1), 66.2 (C-4), 66.8 (C-5), 68.8 (C-11), 74.0 (C-9), 123.9 (C-3'), 130.7 (C-6'), 131.7 (C-5'), 133.4 (C-4'), 134.6 (C-1'), 147.6 (C-2'). HRMS (ESI): calc (found) for  $\text{C}_{17}\text{H}_{26}\text{N}_2\text{O}_7\text{S}$  ( $[\text{M}+\text{H}]^+$ ): 403.1533 (403.1535).

**(*R*)-2-((2*R*,3*S*,4*S*)-3-Hydroxy-2-isopropyl-1-((2-nitrophenyl)sulfonyl)piperidin-4-yl)-propan-1,2-diol ((*S,S,R*)-**36b**) and (*S*)-2-((2*R*,3*S*,4*S*)-3-Hydroxy-2-isopropyl-1-((2-nitrophenyl)sulfonyl)piperidin-4-yl)propan-1,2-diol ((*S,S,S*)-**36b**)**

According to GP10 (*S,S,R*)-**36b** was prepared from (2*R*,3*S*,4*S*)-2-isopropyl-4-((*S*)-2-methyloxiran-2-yl)-1-((2-nitrophenyl)sulfonyl)piperidin-3-ol (*S,S,S*)-**35b** (0.11 g, 0.28 mmol) and perchloric acid (4.0 mL, 4.93 mmol, 7 % in water) as a colorless solid (7.00 mg, 17.4  $\mu$ mol, 6 %). Triol (*S,S,S*)-**36b** was isolated as well as a colorless solid (0.05 g, 124  $\mu$ mol, 44 %). Purification was accomplished by HPLC (Orbit, hexanes/isopropanol (90 : 10), 15 mL / min,  $R_t$  ((*S,S,R*)-**36b**) = 109 min,  $R_t$  ((*S,S,S*)-**36b**) = 113 min).

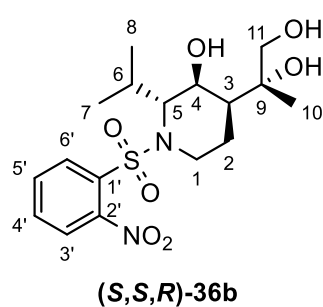

(*S,S,R*)-**36b**, mp 51 °C.  $[\alpha]_D^{20}$  - 121 (*c* 0.4 in  $\text{CHCl}_3$ ).  $R_f$  = 0.09 (hexanes/EtOAc, 1 : 2, anisaldehyde solution). FT-IR (ATR):  $\tilde{\nu}$  = 3372 (br, w), 2967 (m), 2932 (m), 1591 (w), 1543 (vs), 1469 (m), 1440 (m), 1372 (s), 1334 (s), 1279 (m), 1159 (s), 1125 (s), 1085 (m), 1064 (m), 1046 (s), 997 (w), 971 (s), 912 (s), 853 (m), 806 (w), 777 (w), 751 (s), 733 (vs), 688 (w), 652 (m), 581 (s), 560 (m)  $\text{cm}^{-1}$ .

$^1\text{H-NMR}$  (500 MHz,  $\text{CDCl}_3$ )  $\delta$  0.65 (d,  $J$  = 6.6 Hz, 3H, 7-H/8-H), 0.97 (d,  $J$  = 6.6 Hz, 3H, 8-H/7-H), 1.23 (s, 3H, 10-H), 1.45 – 1.51 (m, 1H, 2- $\text{H}_a$ ), 1.67 – 1.73 (m, 1H, 3-H), 1.82 (dddd,  $J$  = 13.2 Hz, 13.2 Hz, 13.2 Hz, 4.6 Hz, 1H, 2- $\text{H}_b$ ), 1.99 (dq,  $J$  = 11.2 Hz, 6.6 Hz, 6.6 Hz, 1H, 6-H), 3.07 – 3.16 (m, 1H, 1- $\text{H}_a$ ), 3.26 (d,  $J$  = 11.3 Hz, 1H, 11- $\text{H}_a$ ), 3.36 (s, br, 1H, OH), 3.48 – 3.53 (m, 1H, 5-H), 3.56 (d,  $J$  = 11.3 Hz, 1H, 11- $\text{H}_b$ ), 4.07 – 4.16 (m, 1H, 1- $\text{H}_b$ ), 4.34 – 4.40 (m, 1H, 4-H), 7.57 – 7.62 (m, 1H, 3'-H), 7.65 – 7.71 (m, 2H, 4'-H, 5'-H), 8.04 – 8.11 (m, 1H, 6'-H).  $^{13}\text{C-NMR}$  (126 MHz,  $\text{CDCl}_3$ )  $\delta$  19.7 (C-7/C-8), 20.1 (C-8/C-7), 20.9 (C-2), 24.8 (C-10), 26.7 (C-6), 41.9 (C-1), 42.1 (C-3), 65.2 (C-4), 66.5 (C-11), 67.0 (C-5), 73.0 (C-9), 124.0 (C-3'), 130.8 (C-6'), 131.8 (C-5'), 133.5 (C-4'), 134.5 (C-1'), 147.6 (C-2'). HRMS (ESI): calc (found) for  $\text{C}_{17}\text{H}_{26}\text{N}_2\text{O}_7\text{S}$  ( $[\text{M}+\text{H}]^+$ ): 403.1533 (403.1535).

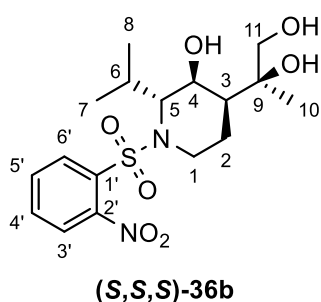

(*S,S,S*)-**36b**, mp 51 °C,  $[\alpha]_D^{20}$  - 107 (*c* 0.5 in  $\text{CHCl}_3$ ).  $R_f$  = 0.06 (hexanes/EtOAc, 1 : 2, anisaldehyde solution). FT-IR (ATR):  $\tilde{\nu}$  = 3388 (br, m), 2967 (m), 2935 (m), 2877 (w), 1591 (w), 1542 (vs), 1469 (m), 1440 (m), 1372 (s), 1335 (s), 1278 (m), 1157 (s), 1124 (s), 1092 (m), 1063 (m), 1047 (s), 973 (s), 912 (s), 853 (m), 807 (w), 777 (w), 751 (s), 733 (vs), 686 (w), 652 (m), 580 (s), 560 (m)

$\text{cm}^{-1}$ .  $^1\text{H-NMR}$  (700 MHz,  $\text{CDCl}_3$ )  $\delta$  0.68 (d,  $J$  = 6.7 Hz, 3H, 7-H/8-H), 0.96 (d,  $J$  = 6.7 Hz, 3H, 8-H/7-H), 1.16 (s, 3H, 10-H), 1.52 – 1.62 (m, 1H, 2- $\text{H}_a$ ), 1.71 – 1.78 (m, 1H, 3-H), 1.91 (dddd,

$J = 13.2$  Hz,  $13.2$  Hz,  $13.2$  Hz,  $4.8$  Hz,  $1\text{H}$ ,  $2\text{-H}_b$ ),  $1.97$  (dq,  $J = 10.8$  Hz,  $6.7$  Hz,  $6.7$  Hz,  $1\text{H}$ ,  $6\text{-H}$ ),  $2.22$  (s, br,  $1\text{H}$ , OH),  $3.08 - 3.18$  (m,  $1\text{H}$ ,  $1\text{-H}_a$ ),  $3.34 - 3.44$  (m,  $2\text{H}$ ,  $2\text{xOH}$ ),  $3.44 - 3.50$  (m,  $1\text{H}$ ,  $5\text{-H}$ ),  $3.56$  (s,  $2\text{H}$ ,  $11\text{-H}$ ),  $4.08 - 4.18$  (m,  $1\text{H}$ ,  $1\text{-H}_b$ ),  $4.39$  (s,  $1\text{H}$ ,  $4\text{-H}$ ),  $7.52 - 7.62$  (m,  $1\text{H}$ ,  $3'\text{-H}$ ),  $7.62 - 7.71$  (m,  $2\text{H}$ ,  $4'\text{-H}$ ,  $5'\text{-H}$ ),  $8.04 - 8.15$  (m,  $1\text{H}$ ,  $6'\text{-H}$ ).  $^{13}\text{C}$ -NMR ( $176$  MHz,  $\text{CDCl}_3$ )  $\delta$   $19.5$  (C-2),  $19.8$  (C-7/C-8),  $20.1$  (C-8/C-7),  $23.1$  (C-10),  $26.5$  (C-6),  $38.9$  (C-3),  $42.0$  (C-1),  $66.2$  (C-4),  $66.8$  (C-5),  $68.7$  (C-11),  $74.1$  (C-9),  $123.9$  (C-3'),  $130.8$  (C-6'),  $131.8$  (C-5'),  $133.4$  (C-4'),  $134.6$  (C-1'),  $147.6$  (C-2'). HRMS (ESI): calc (found) for  $\text{C}_{17}\text{H}_{26}\text{N}_2\text{O}_7\text{S}$  ( $[\text{M}+\text{H}]^+$ ):  $403.1533$  ( $403.1537$ ).

**(*S*)-2-((2*S*,3*R*,4*R*)-2-Benzyl-3-hydroxy-1-((2-nitrophenyl)sulfonyl)piperidin-4-yl)propan-1,2-diol ((*R,R,S*)-**36f**) and (*R*)-2-((2*S*,3*R*,4*R*)-2-Benzyl-3-hydroxy-1-((2-nitrophenyl)sulfonyl)piperidin-4-yl)propan-1,2-diol ((*R,R,R*)-**36f**)**

According to GP10 (*R,R,S*)-**36f** was prepared from a mixture of (2*S*,3*R*,4*R*)-2-benzyl-4-((*S*)-2-methyloxiran-2-yl)-1-((2-nitrophenyl)-sulfonyl)-piperidin-3-ol (*R,R,S*)-**35f** and (2*S*,3*R*,4*R*)-2-benzyl-4-((*R*)-2-methyloxiran-2-yl)-1-((2-nitrophenyl)-sulfonyl)-piperidin-3-ol (*R,R,R*)-**35f** ( $0.15$  g,  $0.36$  mmol) and perchloric acid ( $5.0$  mL,  $6.17$  mmol,  $7\%$  in water) as a colorless solid ( $64.0$  mg,  $0.06$  mmol,  $39\%$ ). Triol (*R,R,R*)-**36f** was isolated as well as a colorless solid ( $64.0$  mg,  $0.06$  mmol,  $39\%$ ). Purification was accomplished by HPLC (OD, *n*-hexane/isopropanol ( $90 : 10$ ),  $15$  mL / min,  $R_t$  ((*R,R,S*)-**36f**) =  $120$  min,  $R_t$  ((*R,R,R*)-**36f**) =  $136$  min.

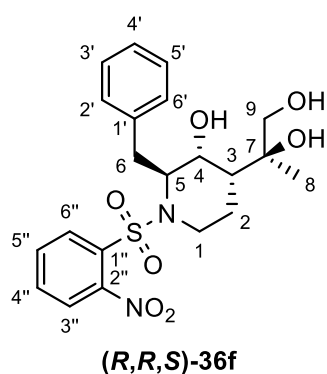

(*R,R,S*)-**36f**, mp  $60$  °C.  $[\alpha]_{\text{D}}^{20} + 30$  ( $c$   $0.2$  in  $\text{CHCl}_3$ ).  $R_f = 0.24$  (hexanes/EtOAc,  $1 : 2$ , anisaldehyde solution), FT-IR (ATR):  $\tilde{\nu} = 3364$  (w, br),  $2922$  (vs),  $2852$  (s),  $1736$  (w),  $1543$  (s),  $1465$  (m),  $1426$  (w),  $1373$  (m),  $1338$  (m),  $1161$  (m),  $1125$  (m),  $1045$  (w),  $995$  (w),  $932$  (w),  $852$  (w),  $732$  (w),  $652$  (w),  $573$  (w),  $418$  (w)  $\text{cm}^{-1}$ .  $^1\text{H}$ -NMR ( $500$  MHz,  $\text{CDCl}_3$ )  $\delta$   $1.23$  (s,  $3\text{H}$ ,  $8\text{-H}$ ),  $1.60 - 1.66$  (m,  $1\text{H}$ ,  $2\text{-H}_a$ ),  $1.87 - 2.01$  (m,  $2\text{H}$ ,  $2\text{-H}_b$ ,  $3\text{-H}$ ),  $2.86$  (dd,  $J = 13.8$  Hz,  $8.4$  Hz,  $1\text{H}$ ,  $6\text{-H}_a$ ),  $2.97$  (dd,  $J = 13.8$  Hz,  $7.2$  Hz,  $1\text{H}$ ,  $6\text{-H}_b$ ),  $3.12 -$

$3.29$  (m, br,  $1\text{H}$ , OH),  $3.32$  (d,  $J = 11.2$  Hz,  $1\text{H}$ ,  $9\text{-H}_a$ ),  $3.33 - 3.41$  (m,  $1\text{H}$ ,  $1\text{-H}_a$ ),  $3.61$  (d,  $J = 11.2$  Hz,  $1\text{H}$ ,  $9\text{-H}_b$ ),  $4.04 - 4.12$  (m,  $2\text{H}$ ,  $1\text{-H}_b$ ,  $4\text{-H}$ ),  $4.16 - 4.21$  (m,  $1\text{H}$ ,  $5\text{-H}$ ),  $7.06 - 7.11$  (m,  $3\text{H}$ ,  $2'\text{-H}$ ,  $4'\text{-H}$ ,  $6'\text{-H}$ ),  $7.11 - 7.16$  (m,  $2\text{H}$ ,  $3'\text{-H}$ ,  $5'\text{-H}$ ),  $7.53 - 7.58$  (m,  $1\text{H}$ ,  $5''\text{-H}$ ),  $7.59 - 7.65$  (m,  $2\text{H}$ ,  $3''\text{-H}$ ,  $4''\text{-H}$ ),  $7.85 - 7.90$  (m,  $1\text{H}$ ,  $6''\text{-H}$ ).  $^{13}\text{C}$ -NMR ( $176$  MHz,  $\text{CDCl}_3$ )  $\delta$   $21.0$  (C-2),  $24.6$  (C-8),  $35.6$  (C-6),  $41.6$  (C-3),  $41.7$  (C-1),  $62.6$  (C-5),  $66.2$  (C-4),  $66.7$  (C-9),  $73.1$  (C-7),  $124.5$  (C-3''),  $127.0$  (C-4'),  $128.6$  (C-3', C-5'),  $129.0$  (C-2', C-6'),  $131.0$  (C-6''),  $132.0$  (C-5''),

133.4 (C-4''), 133.8 (C-1''), 136.9 (C-1'), 147.5 (C-2''). HRMS (ESI): calc (found) for C<sub>21</sub>H<sub>26</sub>N<sub>2</sub>O<sub>7</sub>S ([M+Na]<sup>+</sup>): 473.1353 (473.1352).

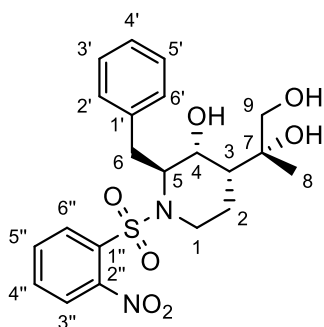

**(*R,R,R*)-36f**

(*R,R,R*)-**36f**, mp 71 °C.  $[\alpha]_D^{20} + 70$  (*c* 0.1 in CHCl<sub>3</sub>). *R*<sub>f</sub> = 0.22 (hexanes/EtOAc, 1 : 2, anisaldehyde solution). FT-IR (ATR):  $\tilde{\nu}$  = 3364 (m, br), 2924 (vs), 2853 (s), 1733 (w), 1542 (vs), 1496 (w), 1455 (m), 1372 (s), 1337 (s), 1277 (m), 1160 (s), 1126 (s), 1089 (m), 1047 (m), 975 (m), 934 (m), 853 (w), 733 (m), 703 (m), 652 (w), 576 (m), 422 (w) cm<sup>-1</sup>. <sup>1</sup>H-NMR (500 MHz, CDCl<sub>3</sub>)  $\delta$  1.23 (s, 3H, 8-H), 1.66 – 1.73 (m, 1H, 2-H<sub>a</sub>), 1.90 – 1.98 (m, 1H, 3-H), 2.05

(dddd, *J* = 13.2 Hz, 13.2 Hz, 13.2 Hz, 4.9 Hz, 1H, 2-H<sub>b</sub>), 2.86 (dd, *J* = 13.7 Hz, 9.9 Hz, 1H, 6-H<sub>a</sub>), 2.97 (dd, *J* = 13.7 Hz, 6.6 Hz, 1H, 6-H<sub>b</sub>), 3.05 (s, br, 1H, OH), 3.18 (s, br, 1H, OH), 3.33 – 3.42 (m, 1H, 1-H<sub>a</sub>), 3.49 – 3.55 (m, 2H, 9-H), 4.04 – 4.12 (m, 2H, 1-H<sub>b</sub>, 4-H), 4.12 – 4.18 (m, 1H, 5-H), 7.08 – 7.13 (m, 3H, 2'-H, 4'-H, 6'-H), 7.14 – 7.19 (m, 2H, 3'-H, 5'-H), 7.54 – 7.66 (m, 3H, 3''-H, 4''-H, 5''-H), 7.89 – 7.95 (m, 1H, 6''-H). <sup>13</sup>C-NMR (176 MHz, CDCl<sub>3</sub>)  $\delta$  19.8 (C-2), 23.2 (C-8), 35.6 (C-6), 38.9 (C-3), 41.7 (C-1), 62.3 (C-5), 66.8 (C-4), 68.6 (C-9), 74.1 (C-7), 124.4 (C-3''), 127.0 (C-4'), 128.6 (C-3', C-5'), 129.0 (C-2', C-6'), 131.0 (C-6''), 132.0 (C-5''), 133.4 (C-4''), 133.9 (C-1''), 136.9 (C-1'), 147.7 (C-2''). HRMS (ESI): calc (found) for C<sub>21</sub>H<sub>26</sub>N<sub>2</sub>O<sub>7</sub>S ([M+Na]<sup>+</sup>): 473.1353 (473.1354).

**(*R*)-2-((2*S*,3*S*,4*R*)-2-Benzyl-3-hydroxy-1-((2-nitrophenyl)sulfonyl)piperidin-4-yl)-propane-1,2-diol ((*S,R,R*)-36f) and (*S*)-2-((2*S*,3*S*,4*R*)-2-Benzyl-3-hydroxy-1-((2-nitrophenyl)sulfonyl)piperidin-4-yl)-propane-1,2-diol ((*S,R,S*)-36f)**

According to GP10 (*S,R,R*)-**36f** was prepared from (2*S*,3*S*,4*R*)-2-benzyl-4-((*S*)-2-methyloxiran-2-yl)-1-((2-nitrophenyl)-sulfonyl)piperidin-3-ol (*S,R,R*)-**35f** (65.0 mg, 0.15 mmol) and perchloric acid (2.0 mL, 2.47 mmol, 7 % in water) as a colorless solid (16.0 mg, 0.04 mmol, 24 %). Triol (*S,R,S*)-**36f** was isolated as well as a colorless solid (7.00 mg, 0.02 mmol, 11 %). Purification was accomplished by HPLC (Orbit, hexanes/isopropanol (90 : 10), 15 mL / min, *R*<sub>t</sub> ((*S,R,R*)-**36f**) = 43 min, *R*<sub>t</sub> ((*S,R,S*)-**36f**) = 51 min.

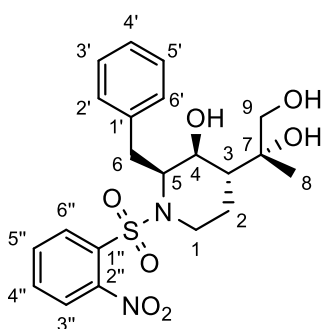

**(S,R,R)-36f**

(*S,R,R*)-**36f**, mp 107 °C.  $[\alpha]_D^{20} + 246$  (*c* 0.1 in CHCl<sub>3</sub>). *R*<sub>f</sub> = 0.27 (hexanes/EtOAc, 1 : 2, anisaldehyde solution). FT-IR (ATR):  $\tilde{\nu}$  = 2929 (m), 1543 (vs), 1468 (m), 1455 (m), 1440 (m), 1374 (vs), 1340 (vs), 1303 (m), 1281 (s), 1260 (m), 1157 (vs), 1125 (s), 1082 (vs), 1048 (vs), 1017 (m), 982 (w), 956 (s), 941 (m), 909 (s), 871 (s), 853 (m), 793 (m), 778 (m), 757 (vs), 730 (vs), 699 (s), 651 (m), 590 (vs), 569 (s), 558 (m), 541 (m), 508 (w), 492 (w), 460 (w), 421 (w) cm<sup>-1</sup>. <sup>1</sup>H-NMR (500 MHz, CDCl<sub>3</sub>)  $\delta$  1.21 (s, 3H, 8-H), 1.35 (dddd, *J* = 12.8 Hz, 12.8 Hz, 12.8 Hz, 4.8 Hz, 1H, 2-H<sub>a</sub>), 1.62 (s, br, 2H, 2xOH), 1.70 – 1.80 (m, 1H, 2-H<sub>b</sub>), 2.19 – 2.28 (m, 1H, 3-H), 2.81 (dd, *J* = 14.1 Hz, 11.3 Hz, 1H, 6-H<sub>a</sub>), 3.19 (dd, *J* = 14.1 Hz, 2.8 Hz, 1H, 6-H<sub>b</sub>), 3.32 – 3.41 (m, 1H, 1-H<sub>a</sub>), 3.42 (d, *J* = 11.1 Hz, 1H, 9-H<sub>a</sub>), 3.59 (d, *J* = 11.1 Hz, 1H, 9-H<sub>b</sub>), 3.94 – 4.02 (m, 1H, 1-H<sub>b</sub>), 4.21 (dd, *J* = 10.9 Hz, 5.4 Hz, 1H, 4-H), 4.24 – 4.30 (m, 1H, 5-H), 6.83 – 6.93 (m, 3H, 3'-H, 4'-H, 5'-H), 6.97 – 7.03 (m, 2H, 2'-H, 6'-H), 7.24 – 7.30 (m, 1H, 5''-H), 7.33 – 7.40 (m, 1H, 6''-H), 7.42 – 7.50 (m, 2H, 3''-H, 4''-H). <sup>13</sup>C-NMR (126 MHz, CDCl<sub>3</sub>)  $\delta$  18.7 (C-8), 27.7 (C-2), 30.0 (C-6), 40.2 (C-3), 40.3 (C-1), 61.2 (C-5), 68.3 (C-9), 71.9 (C-4), 76.4 (C-7), 124.2 (C-3''), 126.3 (C-4'), 128.1 (C-3', C-5'), 129.2 (C-2', C-6'), 130.6 (C-6''), 131.9 (C-5''), 132.8 (C-4''), 134.0 (C-1''), 138.5 (C-1'), 147.1 (C-2''). HRMS (ESI): calc (found) for C<sub>21</sub>H<sub>26</sub>N<sub>2</sub>O<sub>7</sub>S ([M+H]<sup>+</sup>): 451.1533 (451.1533).

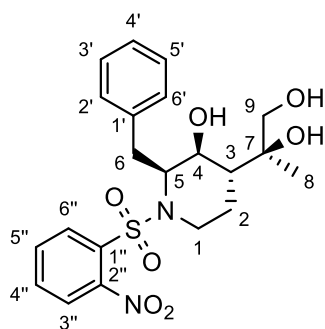

**(S,R,S)-36f**

(*S,R,S*)-**36f**, mp 160 °C.  $[\alpha]_D^{20} + 270$  (*c* 0.1 in CHCl<sub>3</sub>). *R*<sub>f</sub> = 0.19 (hexanes/EtOAc, 1 : 2, anisaldehyde solution). FT-IR (ATR):  $\tilde{\nu}$  = 3029 (w), 2935 (m), 1541 (vs), 1497 (w), 1454 (m), 1440 (m), 1370 (s), 1335 (s), 1282 (m), 1159 (s), 1124 (s), 1097 (m), 1069 (m), 1014 (w), 957 (m), 912 (w), 865 (m), 853 (m), 778 (w), 756 (s), 739 (m), 700 (m), 652 (w), 591 (s), 570 (m), 508 (w) cm<sup>-1</sup>. <sup>1</sup>H-NMR (500 MHz, CDCl<sub>3</sub>)  $\delta$  1.26 (s, 3H, 8-H), 1.42 (dddd, *J* = 13.1 Hz, 13.1 Hz, 13.1 Hz, 4.7 Hz, 1H, 2-H<sub>a</sub>), 1.80 – 1.89 (m, 1H, 2-H<sub>b</sub>), 2.06 – 2.15 (m, 1H, 3-H), 2.78 (dd, *J* = 14.2 Hz, 11.2 Hz, 1H, 6-H<sub>a</sub>), 3.17 (dd, *J* = 14.2 Hz, 2.3 Hz, 1H, 6-H<sub>b</sub>), 3.29 – 3.40 (m, 1H, 1-H<sub>a</sub>), 3.57 (d, *J* = 10.4 Hz, 1H, 9-H<sub>a</sub>), 3.86 (d, *J* = 10.4 Hz, 1H, 9-H<sub>b</sub>), 3.98 – 4.06 (m, 1H, 1-H<sub>b</sub>), 4.15 – 4.27 (m, 2H, 4-H, 5-H), 6.83 – 6.93 (m, 3H, 3'-H, 4'-H, 5'-H), 6.97 – 7.03 (m, 2H, 2'-H, 6'-H), 7.24 – 7.30 (m, 1H, 5''-H), 7.35 – 7.40 (m, 1H, 6''-H), 7.42 – 7.52 (m, 2H, 3''-H, 4''-H). <sup>13</sup>C-NMR (126 MHz, CDCl<sub>3</sub>)  $\delta$  24.2 (C-8), 27.8 (C-2), 29.8 (C-6), 40.7 (C-1), 44.1 (C-3), 61.5 (C-5), 66.2 (C-9), 72.3 (C-4), 76.1 (C-7), 124.2 (C-3''), 126.3 (C-4'), 128.1 (C-3', C-5'), 129.2 (C-2', C-6'), 130.7 (C-6''), 132.0 (C-5''), 132.8 (C-4''), 133.9 (C-1''), 138.5 (C-1'), 147.0 (C-2''). HRMS (ESI): calc (found) for C<sub>21</sub>H<sub>26</sub>N<sub>2</sub>O<sub>7</sub>S ([M+Na]<sup>+</sup>): 473.1353 (473.1359).

### 3) Functionalizations of hydroxypiperidines

In addition to the previous efforts a series of functionalizations of hydroxypiperidines was examined (Table S1). We aimed towards iminosugar analogues with different substitution patterns and stereoinformation to create a variety of compounds for the following biological examinations.

**Table S1: Functionalization of olefin to diols 34**

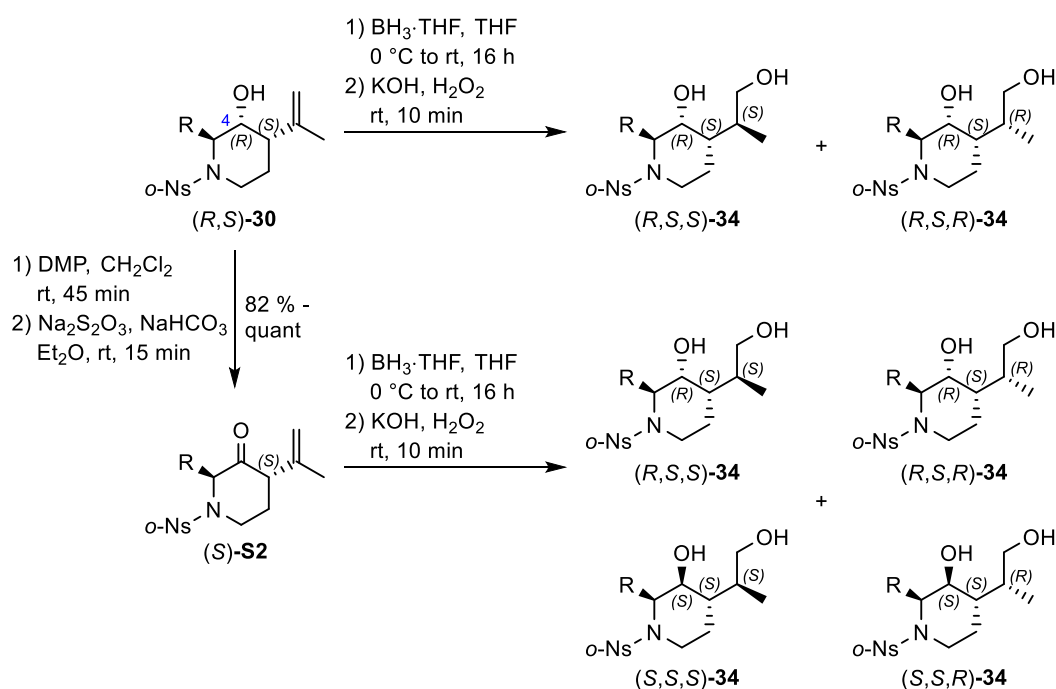

| entry | substrate          | R         | yield <sup>a</sup><br>(R,S,X)-34 [%] | dr <sup>b</sup> | yield <sup>c</sup><br>(S,S,X)-34 [%] | dr <sup>d</sup> |
|-------|--------------------|-----------|--------------------------------------|-----------------|--------------------------------------|-----------------|
| 1     | L-Val              | (R,S)-30a | <i>i</i> -Pr                         | 42              | 74 : 26                              | -               |
| 2     | L-Val              | (S)-S2a   | <i>i</i> -Pr                         | -               | -                                    | 40              |
| 3     | D-Val <sup>e</sup> | (R)-S2b   | <i>i</i> -Pr                         | 8               | 1 : 99<                              | 74              |
| 4     | L-Leu              | (S)-S2c   | <i>i</i> -Bu                         | -               | -                                    | 49              |
| 5     | L-Phe              | (S)-S2f   | Bn                                   | 13              | 23 : 77                              | 36              |

<sup>a</sup> Combined yields of (R,S,S)-34 and (R,S,R)-34; <sup>b</sup> Diastereomeric ratio of (R,S,S)-34 and (R,S,R)-34; <sup>c</sup> Combined yields of (S,S,S)-34 and (S,S,R)-34; <sup>d</sup> Diastereomeric ratio of (S,S,S)-34 and (S,S,R)-34; <sup>e</sup> Starting from D-valine, all stereocenters are inverted. <sup>d,e</sup> Diastereomeric ratios were determined by HPLC and/or <sup>1</sup>H-NMR. In case of dr >99 : 1 no traces of the minor diastereomer could be detected by <sup>1</sup>H-NMR.

Conversion of L-Val alkene (R,S)-30a to diol (R,S,X)-34a was achieved by hydroboration using borane-THF solution. Two diastereomers (R,S,S)-34a and (R,S,R)-34a (entry 1) were isolated in a combined yield of 42 % with a diastereomeric ration of 74 : 26 after separation via HPLC. Since NOESY-data of our compounds showed no major differences due to the free rotation of the *exocyclic* group, the newly formed stereocenter was assigned by comparison to similar structures in the literature.<sup>[18]</sup>

In an attempt to invert the stereoinformation at C-4 of these diols, the alkenes **30** were first converted to their corresponding ketones (*S*)-**S2** by DMP-oxidation according to the literature<sup>[6,16]</sup> in good yields (82 % - quant). This gave the additional benefit of using mixtures of alkenes (*R,S*)-**30** and (*S,S*)-**30**, which differed at the C-4, without the necessity of prior separation of the alkenes by HPLC. Employing the ketones (*S*)-**S2** in borane-mediated hydroboration under the same conditions as before, led to diols (*S,S,S*)-**34** and (*S,S,R*)-**34** with inverted stereochemistry at C-4 compared to the first attempt (entry 1). For L-valine no additional diols (*R,S*)-**34a** were observed with this method. Instead the diols (*S,S,S*)-**34a** and (*S,S,R*)-**34a** were isolated with the desired inversion with a combined yield of 40 % (dr 57 : 43) (entry 2). For D-valine diols (*R,R,R*)-**34b** and (*R,R,S*)-**34b** (all stereocenters are inverted) were isolated with a combined yield of 74 % (dr 49 : 51) (entry 3). In addition diol (*S,R,S*)-**34b** was isolated with 8 % yield as a single diastereomer. L-leucine ketone (*S*)-**S2c** gave (*S,S,S*)-**34c** and (*S,S,R*)-**34c** with a combined yield of 49 % (dr 59 : 41) (entry 4). Turning to L-phenylalanine all four diastereomers could be observed and isolated. The diols (*R,S,S*)-**34f** and (*R,S,R*)-**34f** were isolated with a combined yield of 13 % (dr 23 : 77) and the diols (*S,S,S*)-**34f** and (*S,S,R*)-**34f** were isolated with a combined yield of 36 % (dr 42 : 58) (entry 5). While being isolated mostly as solids, none of these diols could be recrystallized from different solvents to obtain crystal structures for assignment of the newly created *exocyclic* stereocenter. Hence comparison to the literature<sup>[18]</sup> as described above was necessary.

To increase the polarity of the products we addressed next the synthesis of the corresponding triols **36** (Scheme S1). Therefore alkenes **30** were converted to their corresponding epoxides **35** by using *m*-CPBA. The epoxides were isolated as mixtures of diastereomers (*R,R,S*)-**35** and (*R,R,R*)-**35** and were separated for analytical purposes. The newly formed stereocenter couldn't be assigned from the measured NOESY-spectra and therefore assignment was done by comparison of the epoxides **35** to similar compounds from the literature<sup>[19]</sup> and correlation with the triols **36**. The L-valine based epoxides (*R,R,S*)-**35a** and (*R,R,R*)-**35a** were isolated with a combined yield of 93 % (dr 44 : 56) (entry 1), while D-valine gave the epoxides (*S,S,R*)-**35b** and (*S,S,S*)-**35b** with a combined yield of 70 % (dr 33 : 67) (entry 2). For L-phenylalanine both diastereomers, (*R,S*)-**30f** as well as (*S,S*)-**30f**, could successfully be converted (entries 3,4). First, the epoxides (*R,R,S*)-**35f** and (*R,R,R*)-**35f** were isolated with a combined yield of 97 % (dr 60 : 40) (entry 3) and in a following experiment the epoxides (*S,R,S*)-**35f** and (*S,R,R*)-**35f** were isolated with a combined yield of 79 % (44 : 56) (entry 4).

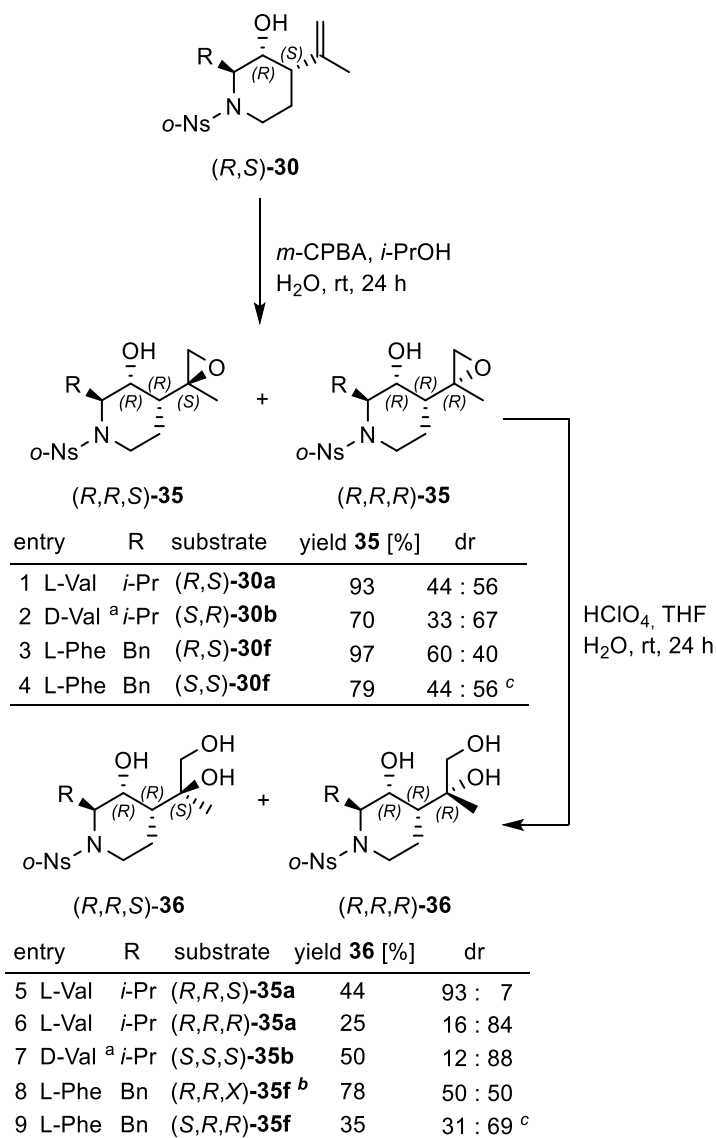

**Scheme S1** <sup>a</sup> All stereocenters are inverted for D-valine; <sup>b</sup> A mixture of (*R,R,S*)-**35f** and (*R,R,R*)-**35f** was used; <sup>c</sup> dr of (*S,R,S*)- and (*S,R,R*)-derivatives. <sup>d</sup> Diastereomeric ratios were determined by HPLC and/or <sup>1</sup>H-NMR.

Subsequently, the epoxide groups were opened with perchloric acid to yield the corresponding triols as mixtures of diastereomers differing at the newly formed stereocenter (Scheme 7). The assignment of the new stereocenter was done by comparison to the literature<sup>[20]</sup> for the same reasons as described above. Also, no crystal structures could be obtained for both species. After separation of the epoxides (*R,R,S*)-**35a** and (*R,R,R*)-**35a**, the single diastereomer (*R,R,S*)-**35a** was converted to triols (*R,R,S*)-**36a** and (*R,R,R*)-**36a** with a combined yield of 44 % (dr 93 : 7) (entry 5), while epoxide (*R,R,R*)-**35a** gave the corresponding triols with a combined yield of 25 % (dr 16 : 84) (entry 6). D-Valine epoxide (*S,S,S*)-**35b** gave the corresponding triols (*S,S,R*)-**36b** and (*S,S,S*)-**36b** in a combined yield of 50 % (dr 12 : 88) (entry 7). For

L-phenylalanine a mixture of both epoxides (*R,R,S*)-**35f** and (*R,R,R*)-**35f** was used, which gave the triols (*R,R,S*)-**36f** and (*R,R,R*)-**36f** in a combined yield of 78 % (dr 50 : 50) (entry 8). Switching to epoxide (*S,R,R*)-**35f** of L-phenylalanine gave the corresponding triols (*S,R,S*)-**36f** and (*S,R,R*)-**36f** in a combined yield of 35 % (dr 31 : 69) (entry 9). Using a single diastereomer of the epoxides gave one of their corresponding triols as major product, which resemble the orientation of the starting material. Mixtures of epoxides could be used as well and gave both diastereomers in the same amount.

#### 4) Stereochemical elucidation of the cyclic hydroxypiperidines

All endocyclic stereocenters of the piperidine ring system could be assigned by analyzing the coupling constants between attached hydrogens using standard Karplus relations. The resulting structures were then verified by comparison to NOESY spectra.

One example for this approach is given in Table S2 by comparison of L-valine derivatives (*R,S*)-**30a** and (*S,S*)-**30a**. This method was applied for all further compounds of this work in an analogous procedure.

**Table S2:** Comparison of  $^3J$ -coupling constants for stereo elucidation of L-valine derivatives (*R,S*)-**30a** and (*S,S*)-**30a**. *Equatorial* hydrogens were marked in red, *axial* hydrogens in blue.

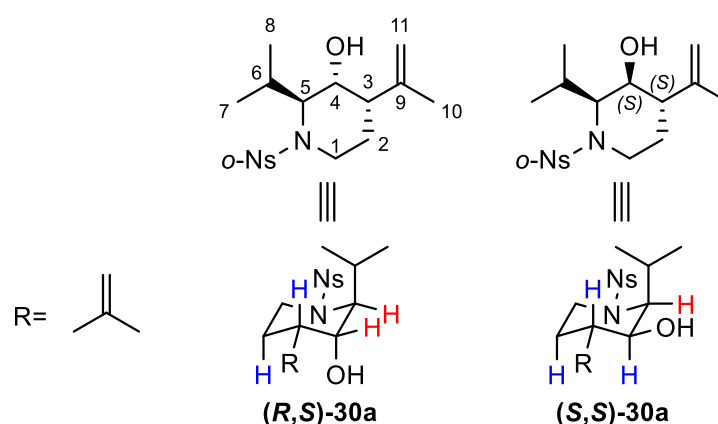

| Entry | Coupling constant | ( <i>R,S</i> )- <b>30a</b> | ( <i>S,S</i> )- <b>30a</b> |
|-------|-------------------|----------------------------|----------------------------|
| (1)   | $^3J_{2H(ax)-3H}$ | 12.7 Hz                    | 13.0 Hz                    |
| (2)   | $^3J_{3H-4H}$     | <5 Hz <sup>a</sup>         | 10.8 Hz                    |
| (3)   | $^3J_{4H-5H}$     | <5 Hz <sup>a</sup>         | 5.2 Hz                     |

<sup>a</sup> Coupling constants taken from multiplet.

The Karplus relation was used to distinguish between *axial* and *equatorial* hydrogens in the six-membered ring system (Table S2). The stereocenter at C-5 was given by L-valine as the starting material. Since alkene (*R,S*)-**30a** showed a coupling constant of 12.7 Hz between one hydrogen of C-2 and C-3 (entry 1), these two hydrogens were in an *axial-axial*-correlation. This information led to an *axial* position of the isopropyl side chain at C-5. Both the coupling constants between hydrogens at C-3 and C-4 as well as between hydrogens at C-4 and C-5 were taken from multiplets and showed values of <5 Hz respectively (entries 2 and 3). Coming from an *axial* position of the hydrogen at C-3, this led to both hydrogens at C-4 and C-5 being in an *equatorial* position. A similar approach for alkene (*S,S*)-**30a** gave again an *axial* position for

the hydrogen at C-3 because of a coupling constant of 13.0 Hz between one of the hydrogens at C-2 and C-3 (entry 1). This time however the coupling constant between the hydrogens at C-3 and C-4 showed a value of 10.8 Hz (entry 2), which indicated an *axial-axial* relation. Therefore, the hydrogen at C-4 was assigned to an *axial* position. The coupling constant for the hydrogens at C-4 and C-5 showed a value of 5.2 Hz (entry 3), which was possible for the expected *axial-equatorial* correlation. The resulting structures were compared to NOESY data for the investigated compounds (Table S3). This confirmed the previously assigned structures.

The newly formed exocyclic stereocenter of the functionalized hydroxy piperidines was assigned by comparison to similar structures from the literature (see Table S4-S8, only selected examples were shown). This method was applied for all further compounds of this work in an analogous procedure.

One example is given in Table S4 by comparison of the L-valine derivatives (*R,S,X*)-**34a** and the L-phenylalanine derivatives (*R,S,X*)-**34f** with compound **S3** from the literature.<sup>[21]</sup> The signals from the <sup>1</sup>H and <sup>13</sup>C NMR-spectra for the exocyclic group containing the newly formed stereocenter were analyzed. The chemical shift values for the 8-H of **S3** were more like the values obtained for the first diols (entry 1). Also, the values for the chemical shifts and coupling constants of 9-H<sub>a</sub> and 9-H<sub>b</sub> were a better fit with these compounds (entries 2 and 3). The values for 10-H (entry 4) were fitting this assignment as well, while the comparison of <sup>13</sup>C NMR signals gave no clear relation to one of these compounds (entries 5 – 7).. However because of the mentioned similarities in the <sup>1</sup>H NMR data the first diols were assigned as (*R,S,S*)-**34a** and (*R,S,S*)-**34f**, while the second diols were assigned as (*R,S,R*)-**34a** and (*R,S,R*)-**34f**. Similar analysis led to assignment of further compounds derived from other amino acids.

**Table S3:** Comparison of NOESY-signals for L-valine derivatives (*R,S*)-**30a** and (*S,S*)-**30a**. Color coding: red: no signal observed, green: signal visible, yellow: no information due to overlapping signals, orange: diagonal.

|                   | 1-H <sub>ax</sub> | 1-H <sub>eq</sub> | 2-H <sub>ax</sub> | 2-H <sub>eq</sub> | 3-H    | 4-H    | 5-H    | 6-H    | 7/8-H  | 8/7-H  | 10-H   | 11-H <sub>a</sub> | 11-H <sub>b</sub> |
|-------------------|-------------------|-------------------|-------------------|-------------------|--------|--------|--------|--------|--------|--------|--------|-------------------|-------------------|
| 1-H <sub>ax</sub> | Orange            |                   |                   |                   |        |        |        |        |        |        |        |                   |                   |
| 1-H <sub>eq</sub> | Green             | Orange            |                   |                   |        |        |        |        |        |        |        |                   |                   |
| 2-H <sub>ax</sub> | Red               | Green             | Orange            |                   |        |        |        |        |        |        |        |                   |                   |
| 2-H <sub>eq</sub> | Green             | Green             | Green             | Orange            |        |        |        |        |        |        |        |                   |                   |
| 3-H               | Green             | Red               | Red               | Green             | Orange |        |        |        |        |        |        |                   |                   |
| 4-H               | Red               | Red               | Red               | Red               | Green  | Orange |        |        |        |        |        |                   |                   |
| 5-H               | Red               | Red               | Red               | Red               | Red    | Green  | Orange |        |        |        |        |                   |                   |
| 6-H               | Green             | Red               | Red               | Red               | Red    | Green  | Green  | Orange |        |        |        |                   |                   |
| 7/8-H             | Green             | Red               | Red               | Red               | Red    | Red    | Green  | Green  | Orange |        |        |                   |                   |
| 8/7-H             | Red               | Red               | Red               | Red               | Green  | Green  | Green  | Green  | Green  | Orange |        |                   |                   |
| 10-H              | Red               | Red               | Red               | Red               | Red    | Green  | Red    | Red    | Red    | Red    | Orange |                   |                   |
| 11-H <sub>a</sub> | Red               | Red               | Green             | Green             | Green  | Red    | Red    | Red    | Red    | Red    | Red    | Orange            |                   |
| 11-H <sub>b</sub> | Red               | Red               | Red               | Red               | Red    | Red    | Red    | Red    | Red    | Red    | Green  | Green             | Orange            |

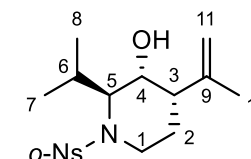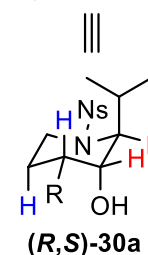

|                   | 1-H <sub>ax</sub> | 1-H <sub>eq</sub> | 2-H <sub>ax</sub> | 2-H <sub>eq</sub> | 3-H    | 4-H    | 5-H    | 6-H    | 7/8-H  | 8/7-H  | 10-H   | 11-H <sub>a</sub> | 11-H <sub>b</sub> |
|-------------------|-------------------|-------------------|-------------------|-------------------|--------|--------|--------|--------|--------|--------|--------|-------------------|-------------------|
| 1-H <sub>ax</sub> | Orange            |                   |                   |                   |        |        |        |        |        |        |        |                   |                   |
| 1-H <sub>eq</sub> | Green             | Orange            |                   |                   |        |        |        |        |        |        |        |                   |                   |
| 2-H <sub>ax</sub> | Green             | Green             | Orange            |                   |        |        |        |        |        |        |        |                   |                   |
| 2-H <sub>eq</sub> | Green             | Green             | Green             | Orange            |        |        |        |        |        |        |        |                   |                   |
| 3-H               | Green             | Red               | Green             | Green             | Orange |        |        |        |        |        |        |                   |                   |
| 4-H               | Red               | Red               | Green             | Green             | Green  | Orange |        |        |        |        |        |                   |                   |
| 5-H               | Red               | Red               | Red               | Red               | Red    | Red    | Orange |        |        |        |        |                   |                   |
| 6-H               | Green             | Red               | Red               | Red               | Green  | Red    | Green  | Orange |        |        |        |                   |                   |
| 7/8-H             | Green             | Red               | Red               | Red               | Red    | Red    | Green  | Green  | Orange |        |        |                   |                   |
| 8/7-H             | Red               | Red               | Red               | Red               | Red    | Red    | Green  | Green  | Green  | Orange |        |                   |                   |
| 10-H              | Red               | Red               | Yellow            | Yellow            | Yellow | Yellow | Red    | Red    | Red    | Red    | Orange |                   |                   |
| 11-H <sub>a</sub> | Red               | Red               | Yellow            | Yellow            | Green  | Green  | Red    | Red    | Red    | Red    | Red    | Orange            |                   |
| 11-H <sub>b</sub> | Red               | Red               | Yellow            | Yellow            | Red    | Red    | Red    | Red    | Red    | Red    | Green  | Green             | Orange            |

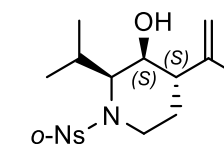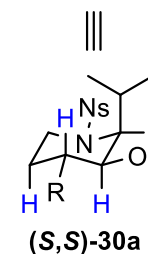

**Table S4:** Comparison of NMR data with the literature known compound **S3**<sup>[21]</sup> for the assignment of the newly formed stereocenter of diols (*R,S,X*)-**34a,f**.

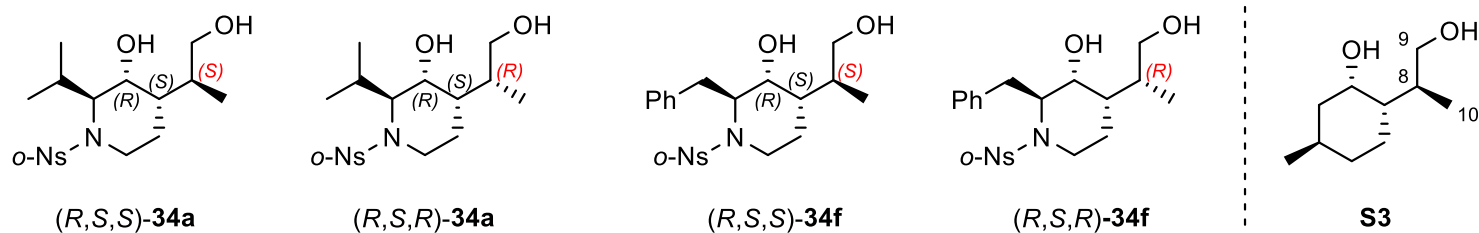

| Entry |                  | <b>(<i>R,S,S</i>)-34a</b>             | <b>(<i>R,S,R</i>)-34a</b>             | <b>(<i>R,S,S</i>)-34f</b>             | <b>(<i>R,S,R</i>)-34f</b>             | <b>S3</b>                             |
|-------|------------------|---------------------------------------|---------------------------------------|---------------------------------------|---------------------------------------|---------------------------------------|
| (1)   | 8-H              | 1.61-1.69 (m)                         | 1.70-1.80 (m)                         | 1.66-1.75 (m)                         | 1.70-1.82 (m)                         | 1.62 (m)                              |
| (2)   | 9-H <sub>a</sub> | 3.50 (dd,<br><i>J</i> = 11.2, 5.2 Hz) | 3.45 (dd,<br><i>J</i> = 11.1, 4.2 Hz) | 3.49 (dd,<br><i>J</i> = 11.0, 5.1 Hz) | 3.50 (dd,<br><i>J</i> = 11.0, 4.4 Hz) | 3.56 (dd,<br><i>J</i> = 11.0, 6.0 Hz) |
| (3)   | 9-H <sub>b</sub> | 3.65 (dd,<br><i>J</i> = 11.2, 3.0 Hz) | 3.49 (dd,<br><i>J</i> = 11.1, 6.4 Hz) | 3.63 (dd,<br><i>J</i> = 11.0, 3.0 Hz) | 3.53 (dd,<br><i>J</i> = 11.0, 6.3 Hz) | 3.68 (dd,<br><i>J</i> = 11.0, 3.0 Hz) |
| (4)   | 10-H             | 0.93-1.00 (m)                         | 0.97 (d, <i>J</i> = 10.6 Hz)          | 1.00 (d, <i>J</i> = 6.9 Hz)           | 0.95 (d, <i>J</i> = 7.0 Hz)           | 1.00 (m, <i>J</i> = 7.0 Hz)           |
| (5)   | C-8              | 37.3                                  | 37.6                                  | 37.1                                  | 37.3                                  | 38.1                                  |
| (6)   | C-9              | 64.6                                  | 64.5                                  | 64.6                                  | 64.5                                  | 65.0                                  |
| (7)   | C-10             | 15.4                                  | 16.3                                  | 15.3                                  | 16.2                                  | 15.9                                  |

**Table S5:** Comparison of NMR data with the literature known compound **S4**<sup>[18]</sup> for the assignment of the newly formed stereocenter of diols (*S,S,X*)-**34a,f**.

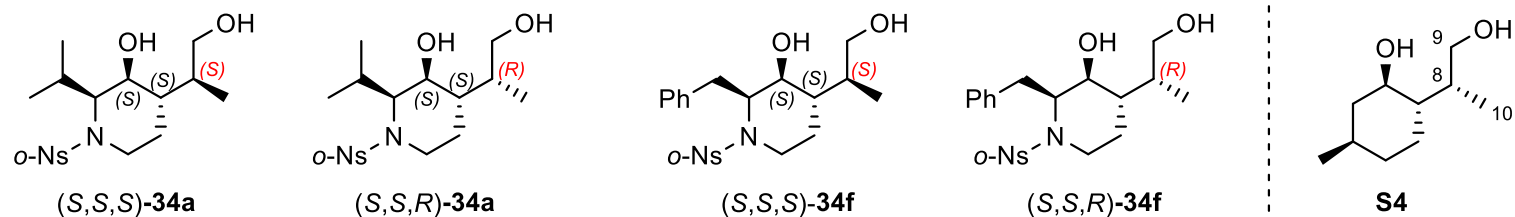

| Entry |                  | ( <i>S,S,S</i> )- <b>34a</b>          | ( <i>S,S,R</i> )- <b>34a</b>          | ( <i>S,S,S</i> )- <b>34f</b>          | ( <i>S,S,R</i> )- <b>34f</b>          | <b>S4</b>                             |
|-------|------------------|---------------------------------------|---------------------------------------|---------------------------------------|---------------------------------------|---------------------------------------|
| (1)   | 8-H              | 1.95-2.13 (m)                         | 1.87-2.00 (m)                         | 1.95-2.10 (m)                         | 1.90-2.02 (m)                         | 1.80-1.88 (m)                         |
| (2)   | 9-H <sub>a</sub> | 3.47 (dd,<br><i>J</i> = 10.5, 7.8 Hz) | 3.54 (dd,<br><i>J</i> = 10.6, 2.8 Hz) | 3.56 (dd,<br><i>J</i> = 10.5, 7.8 Hz) | 3.63 (dd,<br><i>J</i> = 10.5, 3.1 Hz) | 3.56 (dd,<br><i>J</i> = 10.7, 3.4 Hz) |
| (3)   | 9-H <sub>b</sub> | 3.60 (dd,<br><i>J</i> = 10.5, 5.2 Hz) | 3.63 (dd,<br><i>J</i> = 10.6, 6.3 Hz) | 3.70 (dd,<br><i>J</i> = 10.5, 4.8 Hz) | 3.74 (dd,<br><i>J</i> = 10.5, 5.8 Hz) | 3.65 (dd,<br><i>J</i> = 10.7, 5.5 Hz) |
| (4)   | 10-H             | 0.77 (d, <i>J</i> = 6.9 Hz)           | 0.87 (d, <i>J</i> = 7.3 Hz)           | 0.91 (d, <i>J</i> = 6.9 Hz)           | 0.99 (d, <i>J</i> = 7.3 Hz)           | -                                     |
| (5)   | C-8              | 34.8                                  | 40.4                                  | 35.6                                  | 37.4                                  | -                                     |
| (6)   | C-9              | 66.0                                  | 66.1                                  | 66.1                                  | 66.4                                  | 67.2                                  |
| (7)   | C-10             | 11.9                                  | 12.2                                  |                                       |                                       | 11.9                                  |

**Table S6:** Comparison of NMR data with the literature known compounds **S5** and **S6**<sup>[17]</sup> for the assignment of the newly formed stereocenter of triols (*R,R,X*)-**36a,f**.

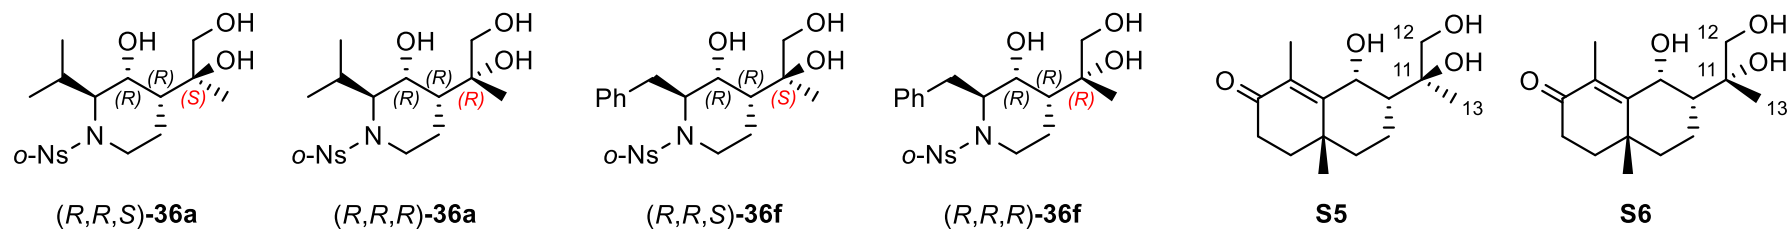

| Entry |                   | ( <i>R,R,S</i> )- <b>36a</b>    | ( <i>R,R,R</i> )- <b>36a</b> | ( <i>R,R,S</i> )- <b>36f</b>    | ( <i>R,R,R</i> )- <b>36f</b> | <b>S5</b>                       | <b>S6</b>                       |
|-------|-------------------|---------------------------------|------------------------------|---------------------------------|------------------------------|---------------------------------|---------------------------------|
| (1)   | 12-H <sub>a</sub> | 3.26 (d,<br><i>J</i> = 11.5 Hz) | 3.57 (s),                    | 3.32 (d,<br><i>J</i> = 11.2 Hz) | 3.49-3.55 (m),               | 3.34 (d,<br><i>J</i> = 11.2 Hz) | 3.62 (d,<br><i>J</i> = 11.9 Hz) |
| (2)   | 12-H <sub>b</sub> | 3.55 (d,<br><i>J</i> = 11.5 Hz) | -                            | 3.61 (d,<br><i>J</i> = 11.2 Hz) | -                            | 3.73 (d,<br><i>J</i> = 11.2 Hz) | 3.78 (d,<br><i>J</i> = 11.9 Hz) |
| (3)   | 13-H              | 1.22 (s)                        | 1.17 (s)                     | 1.23 (s)                        | 1.23 (s)                     | 1.34 (s)                        | 1.23 (s)                        |
| (4)   | C-11              | 73.0                            | 74.0                         | 73.1                            | 74.1                         | 74.8                            | 75.7                            |
| (5)   | C-12              | 66.5                            | 68.8                         | 66.7                            | 68.6                         | 66.2                            | 69.2                            |
| (6)   | C-13              | 24.8                            | 23.1                         | 24.6                            | 23.2                         | 24.4                            | 22.8                            |

**Table S7:** Comparison of NMR data with the literature known compounds **S7** and **S8**<sup>[20]</sup> for the assignment of the newly formed stereocenter of triols (*S,R,X*)-**36a,f**.

| 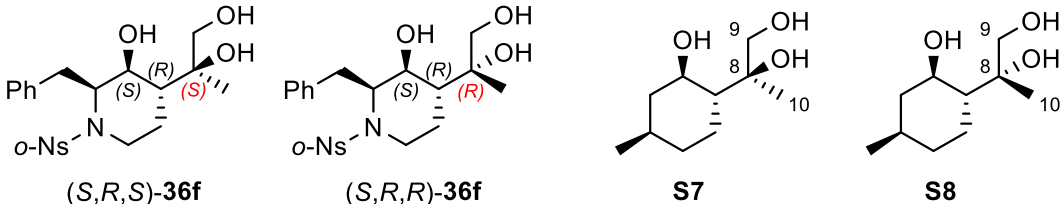                                                                                                                          |                  |                                 |                                 |                                       |                                       |
|-------------------------------------------------------------------------------------------------------------------------------------------------------------------------------------------------------------|------------------|---------------------------------|---------------------------------|---------------------------------------|---------------------------------------|
| <div style="display: flex; justify-content: space-around; width: 100%;"> <span>(<i>S,R,S</i>)-<b>36f</b></span> <span>(<i>S,R,R</i>)-<b>36f</b></span> <span><b>S7</b></span> <span><b>S8</b></span> </div> |                  |                                 |                                 |                                       |                                       |
| Entry                                                                                                                                                                                                       |                  | ( <i>S,R,S</i> )- <b>36f</b>    | ( <i>S,R,R</i> )- <b>36f</b>    | <b>S7</b>                             | <b>S8</b>                             |
| (1)                                                                                                                                                                                                         | 9-H <sub>a</sub> | 3.57 (d,<br><i>J</i> = 10.4 Hz) | 3.42 (d,<br><i>J</i> = 11.1 Hz) | 3.34 (dd,<br><i>J</i> = 10.3, 5.5 Hz) | 3.16 (dd,<br><i>J</i> = 11.2, 5.1 Hz) |
| (2)                                                                                                                                                                                                         | 9-H <sub>b</sub> | 3.86 (d,<br><i>J</i> = 10.4 Hz) | 3.59 (d,<br><i>J</i> = 11.1 Hz) | 3.41 (dd,<br><i>J</i> = 10.8, 6.2 Hz) | 3.26 (dd,<br><i>J</i> = 11.2, 6.9 Hz) |
| (3)                                                                                                                                                                                                         | 10-H             | 1.26 (s)                        | 1.21 (s)                        | 1.01 (s)                              | 0.97 (s)                              |
| (4)                                                                                                                                                                                                         | C-8              | 76.1                            | 76.4                            | 74.8                                  | 75.7                                  |
| (5)                                                                                                                                                                                                         | C-9              | 66.2                            | 68.3                            | 67.6                                  | 68.1                                  |
| (6)                                                                                                                                                                                                         | C-10             | 24.2                            | 18.7                            | 22.1                                  | 19.8                                  |

**Table S8:** Comparison of NMR data with the literature known compounds **S9** and **S10**<sup>[19]</sup> for the assignment of the newly formed stereocenter of epoxides (*S,R,X*)-**35f**.

| 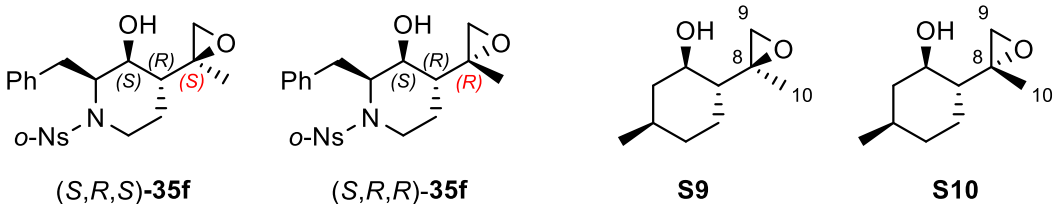                                                                                                                         |                  |                                 |                                 |                                       |                                       |
|--------------------------------------------------------------------------------------------------------------------------------------------------------------------------------------------------------------|------------------|---------------------------------|---------------------------------|---------------------------------------|---------------------------------------|
| <div style="display: flex; justify-content: space-around; width: 100%;"> <span>(<i>S,R,S</i>)-<b>35f</b></span> <span>(<i>S,R,R</i>)-<b>35f</b></span> <span><b>S9</b></span> <span><b>S10</b></span> </div> |                  |                                 |                                 |                                       |                                       |
| Eintrag                                                                                                                                                                                                      |                  | ( <i>S,R,S</i> )- <b>35f</b>    | ( <i>S,R,R</i> )- <b>35f</b>    | <b>S9</b>                             | <b>S10</b>                            |
| (1)                                                                                                                                                                                                          | 9-H <sub>a</sub> | 2.60 (d,<br><i>J</i> = 11.1 Hz) | 2.71 (d,<br><i>J</i> = 10.4 Hz) | 2.54 (dd,<br><i>J</i> = 11.2, 5.1 Hz) | 2.66 (dd,<br><i>J</i> = 10.3, 5.5 Hz) |
| (2)                                                                                                                                                                                                          | 9-H <sub>b</sub> | 2.66 (d,<br><i>J</i> = 11.1 Hz) | 3.05 (d,<br><i>J</i> = 10.4 Hz) | 2.59 (dd,<br><i>J</i> = 11.2, 6.9 Hz) | 2.92 (dd,<br><i>J</i> = 10.8, 6.2 Hz) |
| (3)                                                                                                                                                                                                          | 10-H             | 1.36 (s)                        | 1.42 (s)                        | 1.31 (s)                              | 1.37 (s)                              |
| (4)                                                                                                                                                                                                          | C-8              | 58.5                            | 60.1                            | 59.1                                  | 60.2                                  |
| (5)                                                                                                                                                                                                          | C-9              | 52.6                            | 51.7                            | 51.2                                  | 49.0                                  |
| (6)                                                                                                                                                                                                          | C-10             | 16.3                            | 20.9                            | 16.9                                  | 20.8                                  |

## 5) Chitin fiber synthesis assay with *Thalassiosira rotula*

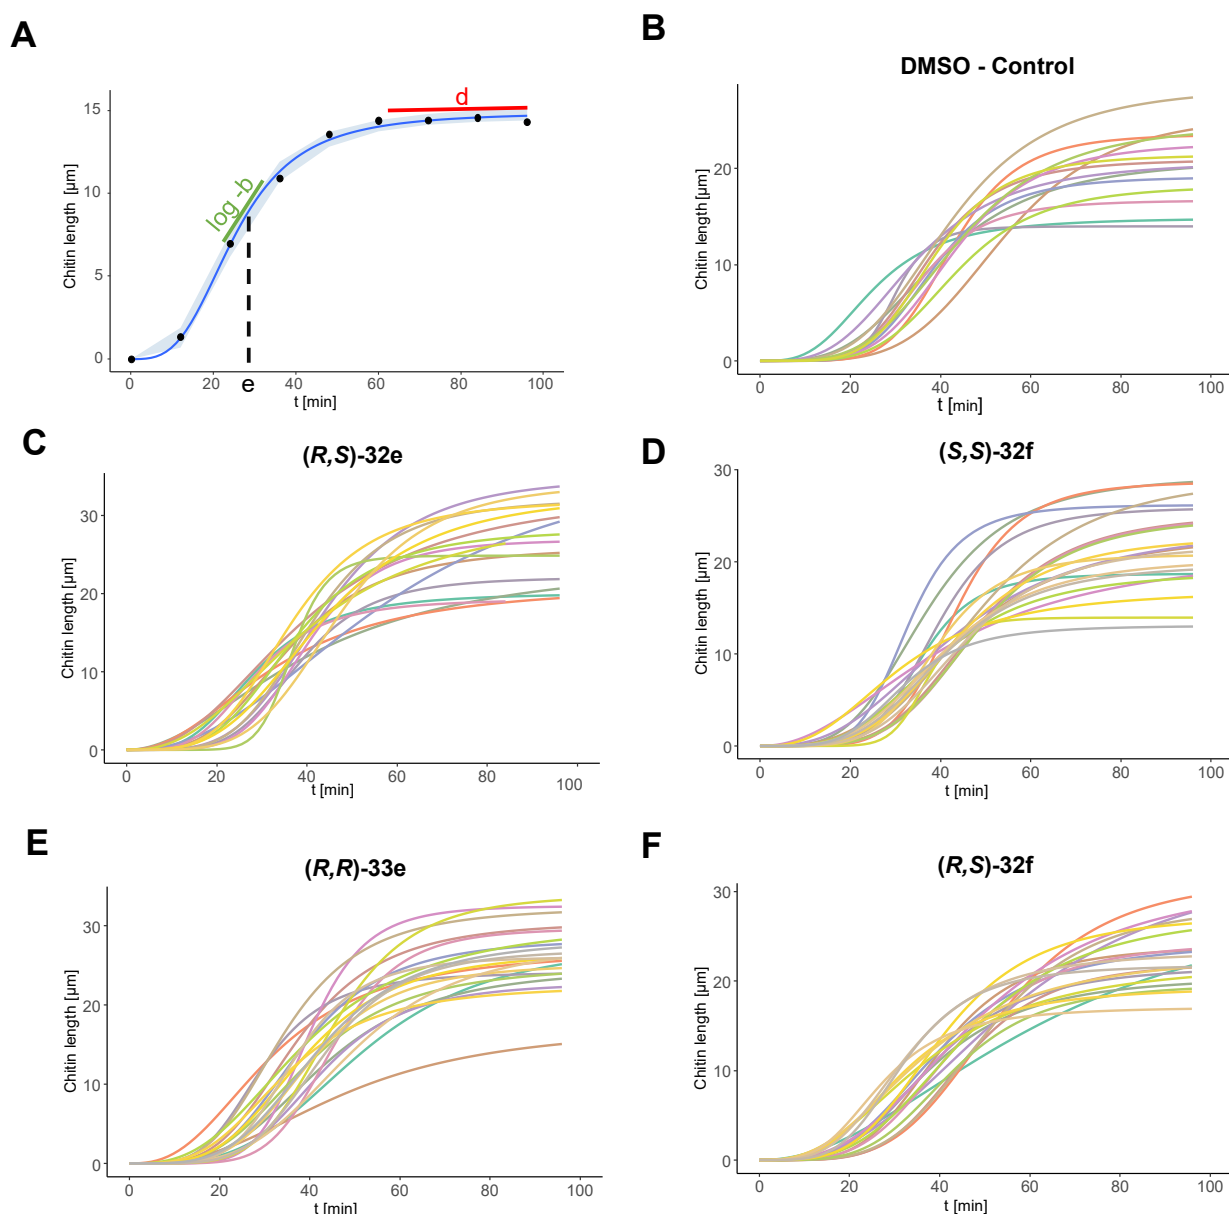

**Figure S1:** Nonlinear regression model fit of the single cell measurements. **A:** Interpretation of the calculated parameters.  $e$  is the halfway point (time where half the maximum length of the chitin is synthesized),  $b$  is the Hill slope (relative slope at the halfway point),  $d$  is the achieved length of the synthesized chitin fiber. Black dots are original chitin length measurements of cell 1 from the DMSO control (see Supplementary File 1 - *Thalassiosira* Measurements). Blue line represents the calculated fit. Light-blue ribbon signifies the 95% confidence interval calculated with the *predict* function in R<sup>[22]</sup>. **B-F:** Three-parameter logistic fit of the single chitin measurements for each individual treatment. **B:** (S,S)-32f, **C:** (R,S)-33e, **D:** (R,S)-33f, and **E:** (R,R)-33e). For each treatment condition the cells were supplemented with 100 μM (final concentration) iminosugar and were observed for 100 min. All fits were calculated with the *drc* function (LL.3) of the *drc* package (version 3.0-1) in R<sup>[23]</sup>.

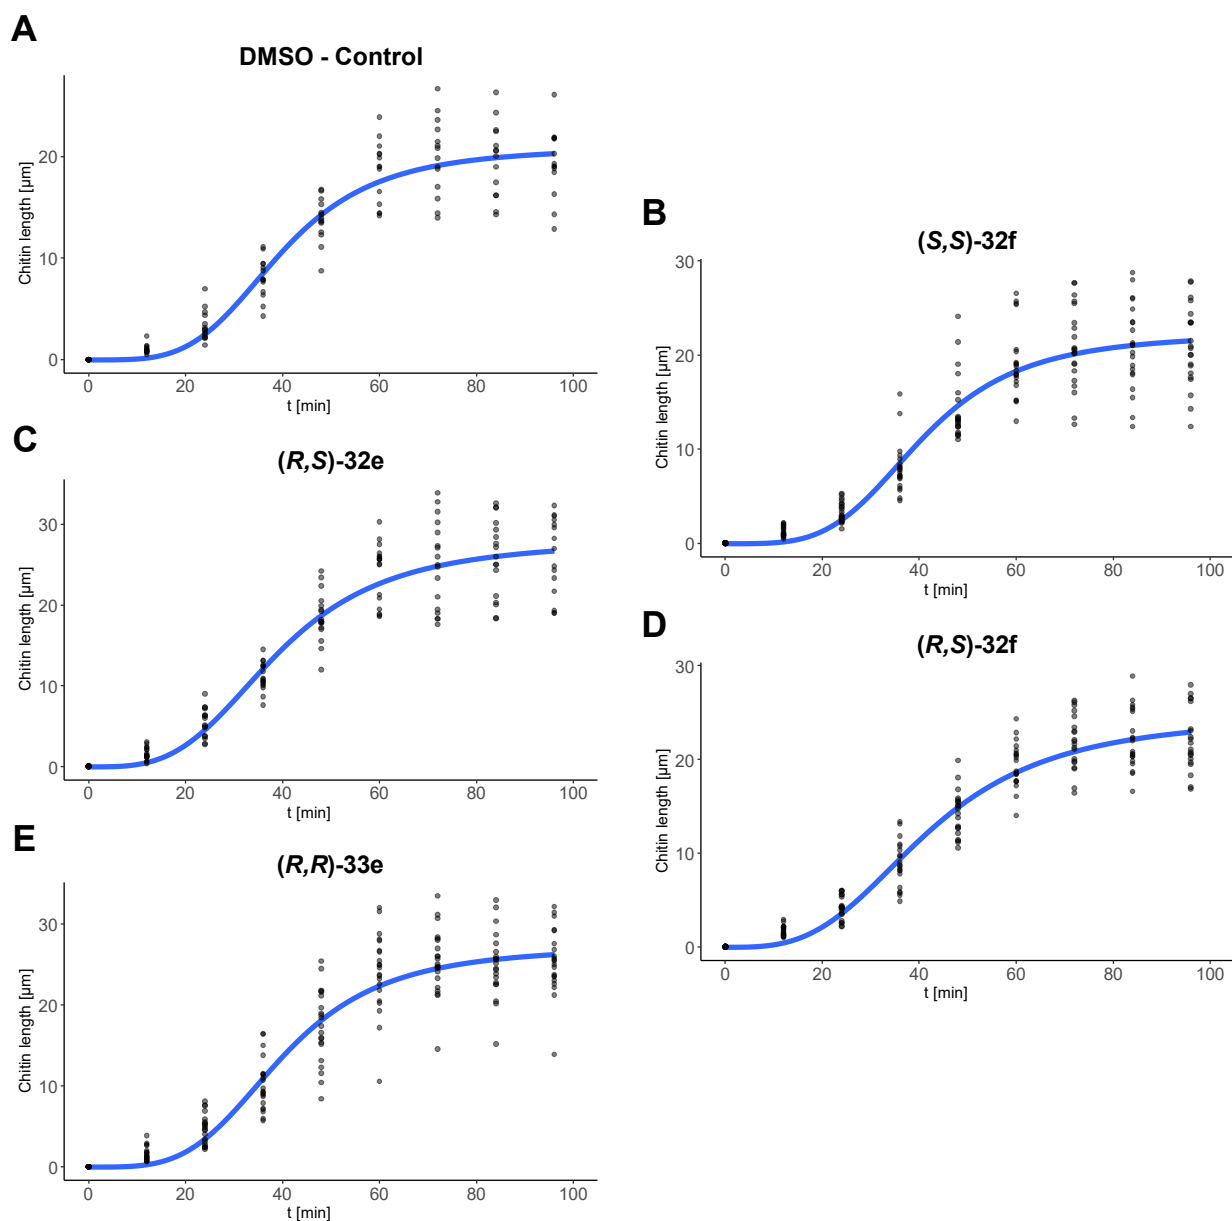

**Figure S2:** Average of the three-parameter logistic fit of the iminosugar-treated cells (blue line). The original measured datapoints are represented by black dots. In each dataset the cells were treated with 100 μM iminosugar (final concentration) and were observed for 100 min. **A:** Control with DMSO, **B:** (S,S)-32f, **C:** (R,S)-32e, **D:** (R,S)-32f, and **E:** (R,R)-33e. All fits were calculated with the *drm* function (LL.3) of the *drc* package (version 3.0-1) in the R environment<sup>[23]</sup>.

## 6) Literature

- [1] L. Fanter, D. Schepmann, B. Wünsch, *Archiv der Pharmazie* **n.d.**, 351, 1700334.
- [2] J. Tauchman, I. Císařová, P. Štěpnička, *European Journal of Organic Chemistry* **2010**, 2010, 4276–4287.
- [3] J. Li, Y. Sha, *Molecules* **2008**, 13, 1111–1119.
- [4] M. Cambiè, P. D'Arrigo, E. Fasoli, S. Servi, D. Tessaro, F. Canevotti, L. Del Corona, *Tetrahedron: Asymmetry* **2003**, 14, 3189–3196.
- [5] S. G. Davies, H. J. Sanganee, P. Szolcsanyi, *Tetrahedron* **1999**, 55, 3337–3354.
- [6] Y. Liu, A. Maden, W. V. Murray, *Tetrahedron* **2002**, 58, 3159–3170.
- [7] W. Russell Bowman, D. R. Coghlan, *Tetrahedron* **1997**, 53, 15787–15798.
- [8] A. Yen, A. H. Pham, E. M. Larin, M. Lautens, *Org. Lett.* **2019**, 21, 7549–7553.
- [9] E. Biron, H. Kessler, *J. Org. Chem.* **2005**, 70, 5183–5189.
- [10] F. Salvaggio, J. T. Hodgkinson, L. Carro, S. M. Geddis, W. R. J. D. Galloway, M. Welch, D. R. Spring, *Eur. J. Org. Chem.* **2016**, 2016, 434–437.
- [11] S. Laschat, M. Grehl, *Chem. Ber.* **1994**, 127, 2023–2034.
- [12] T. K. Sarkar, S. K. Nandy, *Tetrahedron Letters* **1996**, 37, 5195–5198.
- [13] C. A. M. Cariou, B. M. Kariuki, J. S. Snaith, *Org. Biomol. Chem.* **2008**, 6, 3337–3348.
- [14] U. Voigtmann, S. Blechert, *Org. Lett.* **2000**, 2, 3971–3974.
- [15] J. J. Turner, N. Wilschut, H. S. Overkleeft, W. Klaffke, G. A. van der Marel, J. H. van Boom, *Tetrahedron Letters* **1999**, 40, 7039–7042.
- [16] W.-D. Z. Li, Z.-H. Gao, *Org. Lett.* **2005**, 7, 2917–2920.
- [17] F. J. Aladro, F. M. Guerra, F. J. Moreno-Dorado, J. M. Bustamante, Z. D. Jorge, G. M. Massanet, *Tetrahedron* **2001**, 57, 2171–2178.
- [18] J. A. Moreira, A. G. Corrêa, *Tetrahedron: Asymmetry* **2003**, 14, 3787–3795.
- [19] J. H. Kim, H. J. Lim, S. H. Cheon, *Tetrahedron* **2003**, 59, 7501–7507.
- [20] T. M. Le, T. Huynh, G. Endre, A. Szekeres, F. Fülöp, Z. Szakonyi, *RSC Adv.* **2020**, 10, 38468–38477.
- [21] J. Casanovas, A. M. Namba, S. León, G. L. B. Aquino, G. V. J. da Silva, C. Alemán, *J. Org. Chem.* **2001**, 66, 3775–3782.
- [22] R Core Team, *R: A Language and Environment for Statistical Computing*, Vienna, Austria, **2022**.
- [23] C. Ritz, F. Baty, J. C. Streibig, D. Gerhard, *PLOS ONE* **2015**, 10, e0146021.

## 7) NMR-spectra

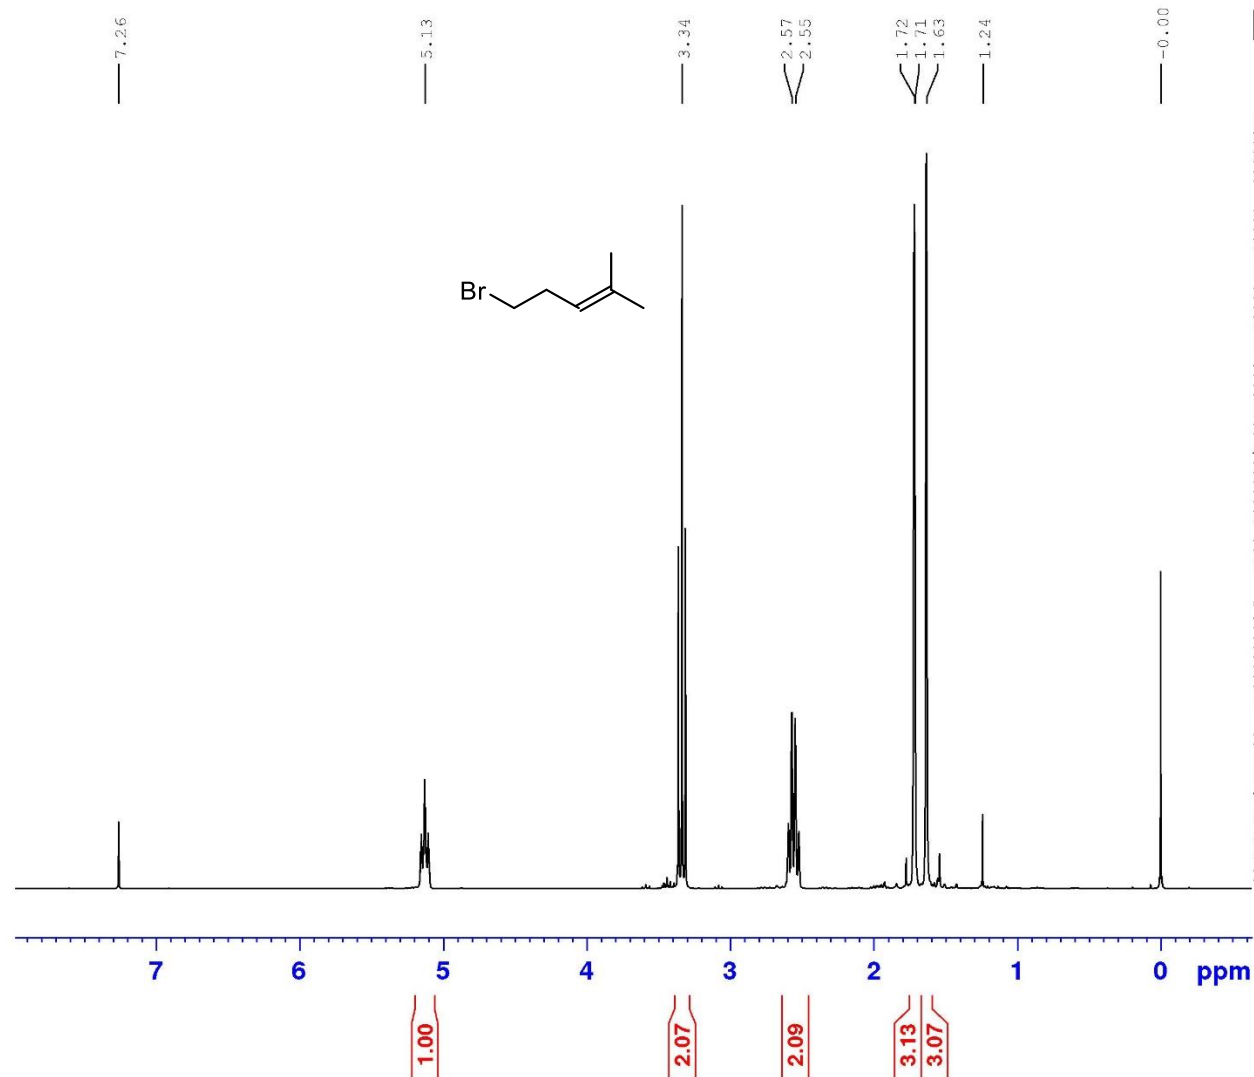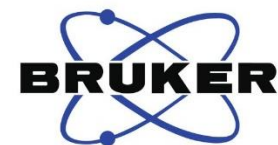

Current Data Parameters  
 NAME Aug02-2018  
 EXPNO 210  
 PROCNO 1

F2 - Acquisition Parameters  
 Date\_ 20180802  
 Time 11.57  
 INSTRUM spect  
 PROBHD 5 mm PABBO BB-  
 PULPROG zg30  
 TD 32768  
 SOLVENT CDCl3  
 NS 16  
 DS 2  
 SWH 6188.119 Hz  
 FIDRES 0.188846 Hz  
 AQ 2.6476543 sec  
 RG 203  
 DW 80.800 usec  
 DE 8.00 usec  
 TE 298.1 K  
 D1 1.00000000 sec  
 TD0 1

===== CHANNEL f1 =====  
 NUC1 1H  
 P1 11.05 usec  
 PL1 -2.00 dB  
 PLLW 37.02396774 W  
 SFO1 300.1318534 MHz

F2 - Processing parameters  
 SI 16384  
 SF 300.1300057 MHz  
 WDW EM  
 SSB 0  
 LB 0.30 Hz  
 GB 0  
 PC 1.00

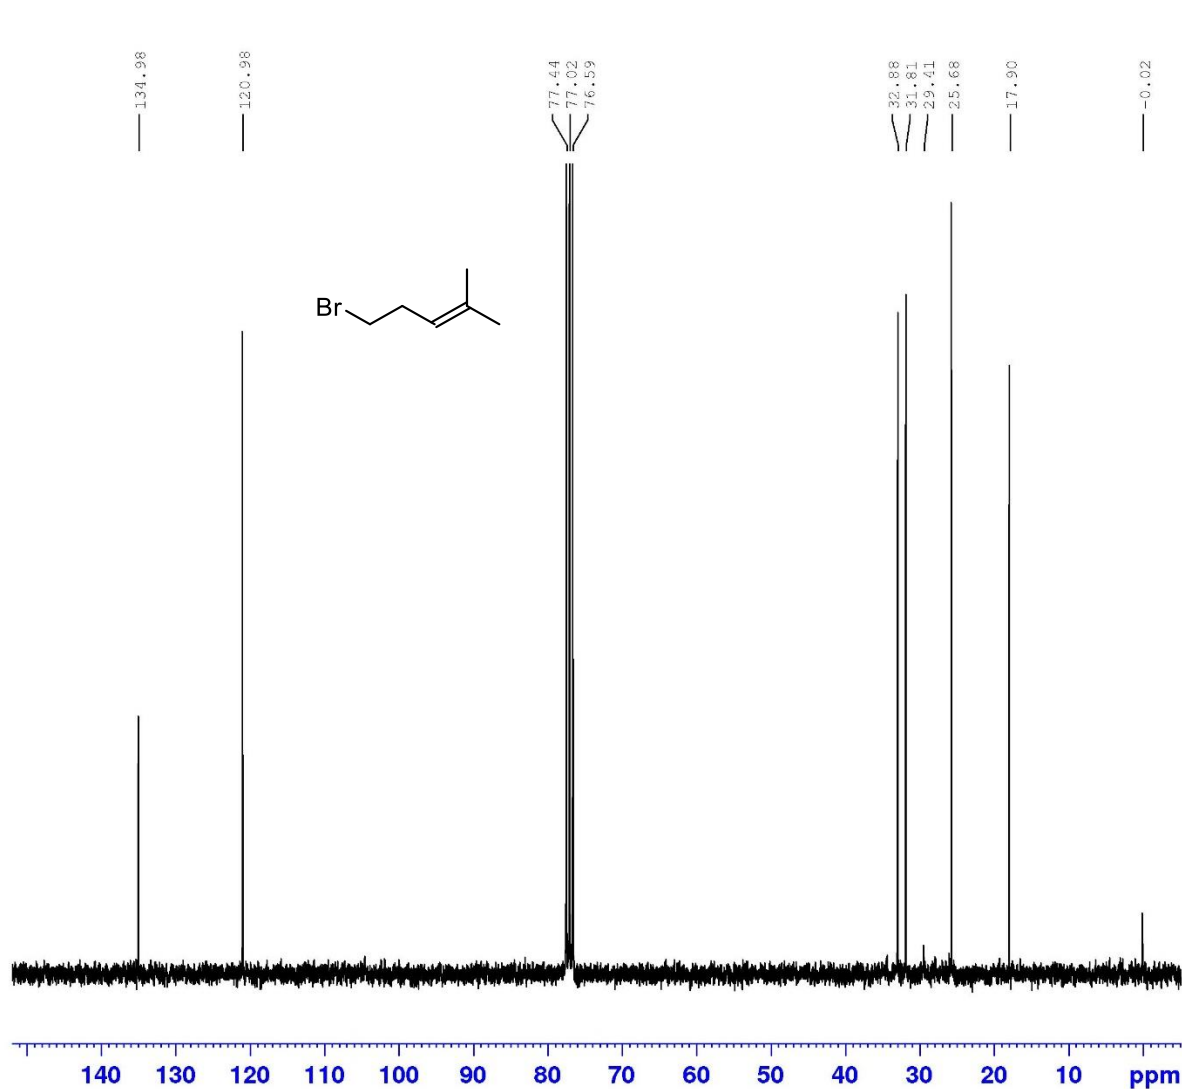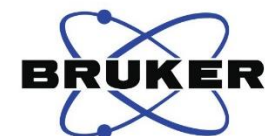

Current Data Parameters  
 NAME Aug02-2018  
 EXPNO 211  
 PROCNO 1

F2 - Acquisition Parameters  
 Date\_ 20180802  
 Time\_ 21.39  
 INSTRUM spect  
 PROBHD 5 mm PABBO BB-  
 PULPROG zgpg30  
 TD 65536  
 SOLVENT CDCl3  
 NS 512  
 DS 4  
 SWH 18028.846 Hz  
 FIDRES 0.275098 Hz  
 AQ 1.8175317 sec  
 RG 1820  
 DW 27.733 usec  
 DE 8.00 usec  
 TE 298.5 K  
 D1 2.0000000 sec  
 D11 0.03000000 sec  
 TD0 1

===== CHANNEL f1 =====  
 NUC1 13C  
 P1 11.75 usec  
 PL1 0 dB  
 PL1W 31.14739227 W  
 SFO1 75.4752953 MHz

===== CHANNEL f2 =====  
 CPDPRG[2] waltz16  
 NUC2 1H  
 PCPD2 100.00 usec  
 PL2 -2.00 dB  
 PL12 17.05 dB  
 PL13 19.00 dB  
 PL2W 37.02396774 W  
 PL12W 0.46076876 W  
 PL13W 0.29409182 W  
 SFO2 300.1312005 MHz

F2 - Processing parameters  
 SI 32768  
 SF 75.4677490 MHz  
 WDW EM  
 SSB 0  
 LB 1.00 Hz  
 GB 0  
 PC 1.40

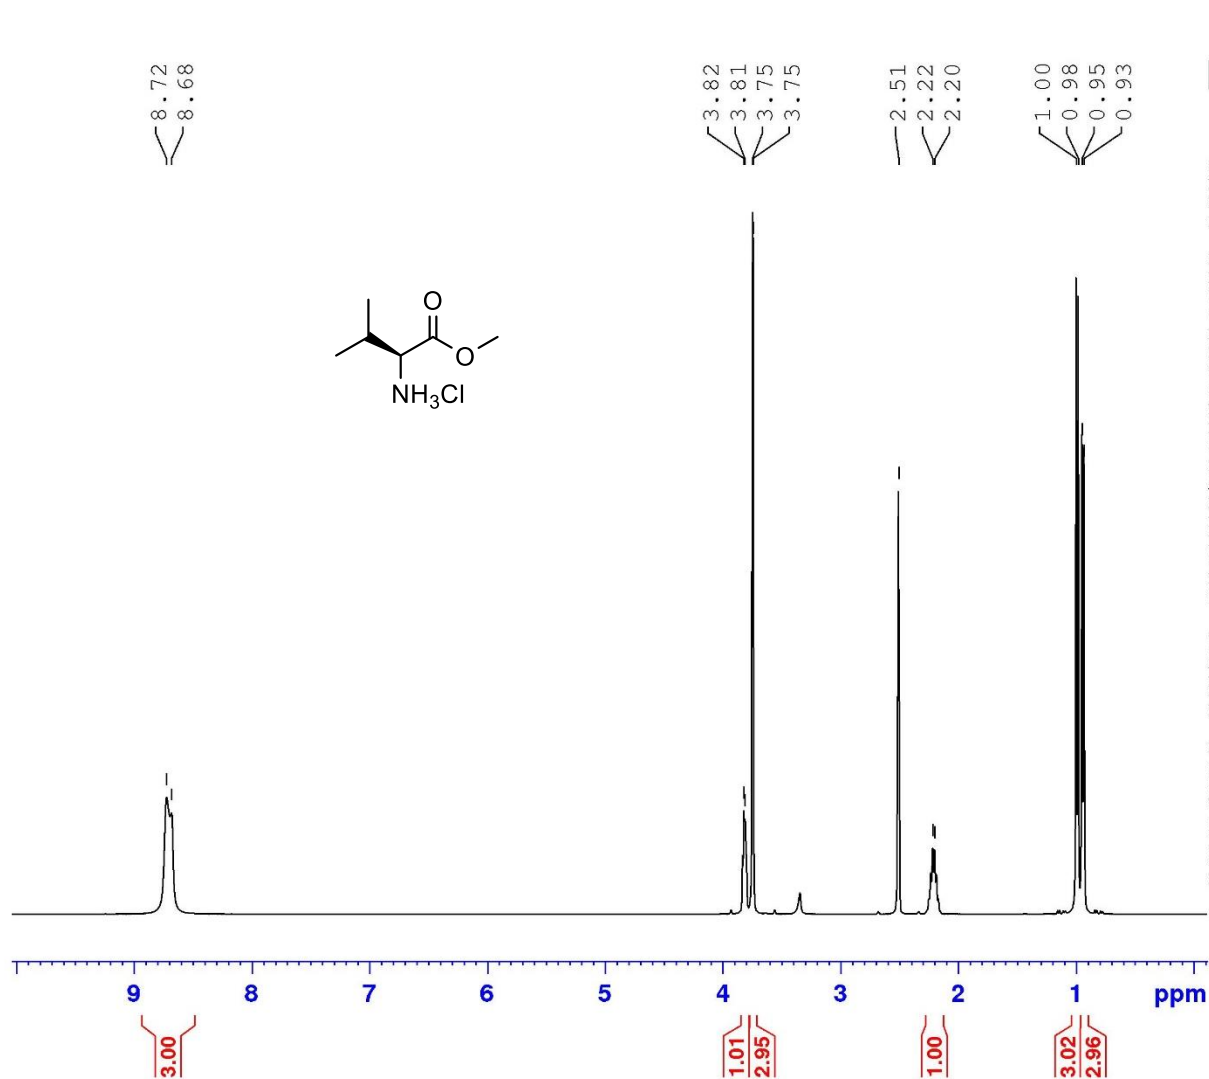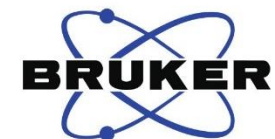

Current Data Parameters  
 NAME Mar05-2020  
 EXPNO 390  
 PROCNO 1

F2 - Acquisition Parameters  
 Date\_ 20200306  
 Time 2.03  
 INSTRUM spect  
 PROBHD 5 mm PABBO BB/  
 PULPROG zg30  
 TD 65536  
 SOLVENT DMSO  
 NS 16  
 DS 2  
 SWH 8012.820 Hz  
 FIDRES 0.122266 Hz  
 AQ 4.0894465 sec  
 RG 114.36  
 DW 62.400 usec  
 DE 6.50 usec  
 TE 298.0 K  
 D1 1.00000000 sec  
 TDO 1

===== CHANNEL f1 =====  
 SFO1 400.1024708 MHz  
 NUC1 1H  
 P1 13.70 usec  
 PLW1 12.00000000 W

F2 - Processing parameters  
 SI 65536  
 SF 400.1000000 MHz  
 WDW EM  
 SSB 0  
 LB 0.30 Hz  
 GB 0  
 PC 1.00

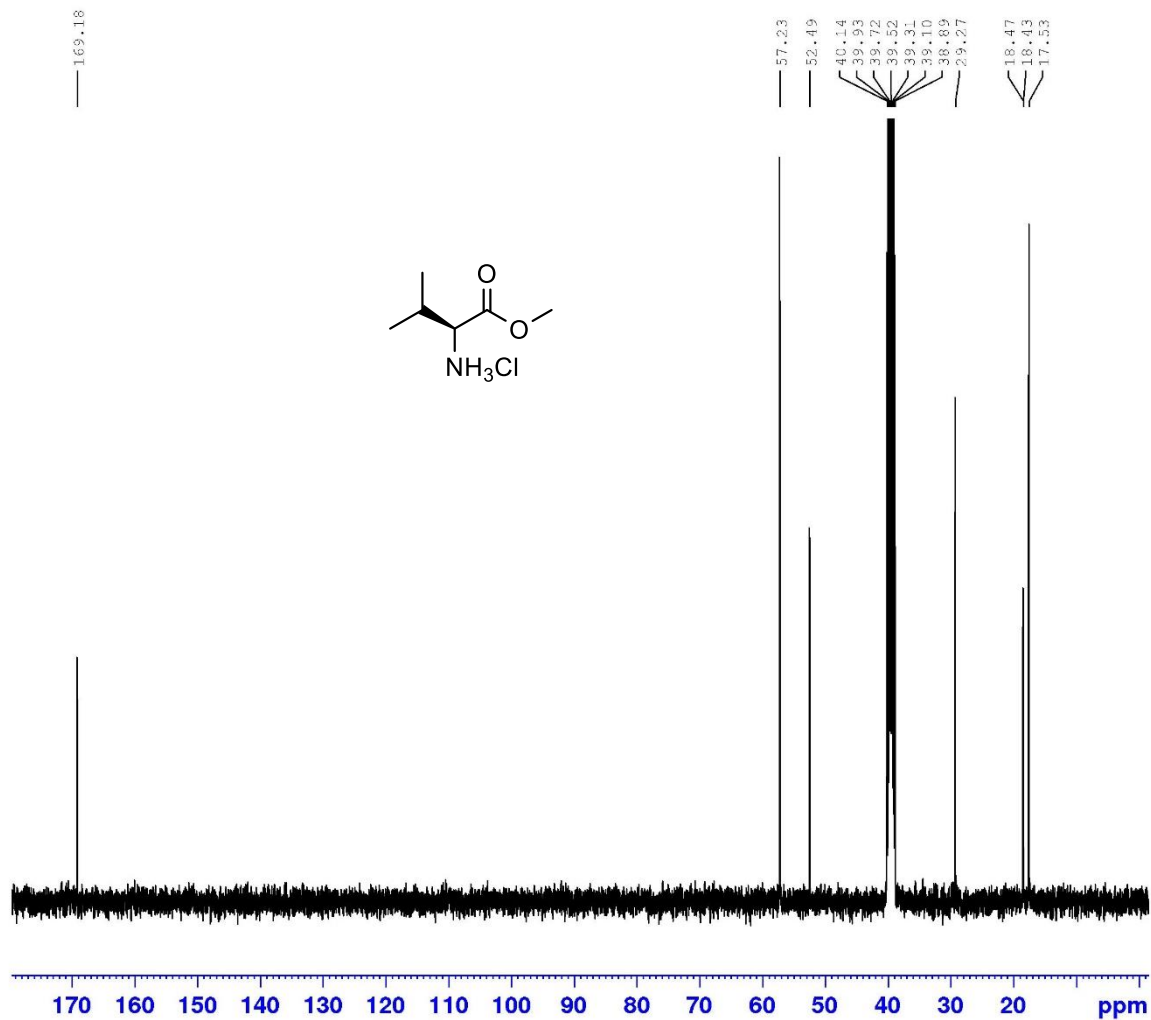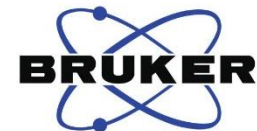

Current Data Parameters  
 NAME Mar05-2020  
 EXPNO 391  
 PROCNO 1

F2 - Acquisition Parameters  
 Date\_ 20200306  
 Time 2.33  
 INSTRUM spect  
 PROBHD 5 mm PABBO BB/  
 PULPROG zgpg30  
 ID 65536  
 SOLVENT DMSO  
 NS 512  
 DS 4  
 SWH 24038.461 Hz  
 FIDRES 0.366798 Hz  
 AQ 1.3631488 sec  
 RG 205.35  
 DW 20.800 usec  
 DE 6.50 usec  
 TE 298.0 K  
 D1 2.00000000 sec  
 D11 0.03000000 sec  
 TD0 1

===== CHANNEL f1 =====  
 SFO1 100.6152851 MHz  
 NUC1 13C  
 P1 10.00 usec  
 PLW1 48.00000000 W

===== CHANNEL f2 =====  
 SFO2 400.1016004 MHz  
 NUC2 1H  
 CPDPRG[2] waltz16  
 PCPD2 90.00 usec  
 PLW2 12.00000000 W  
 PLW12 0.27805999 W  
 PLW13 0.22522999 W

F2 - Processing parameters  
 SI 32768  
 SF 100.6052746 MHz  
 WDW EM  
 SSB 0  
 LB 1.00 Hz  
 GB 0  
 PC 1.40

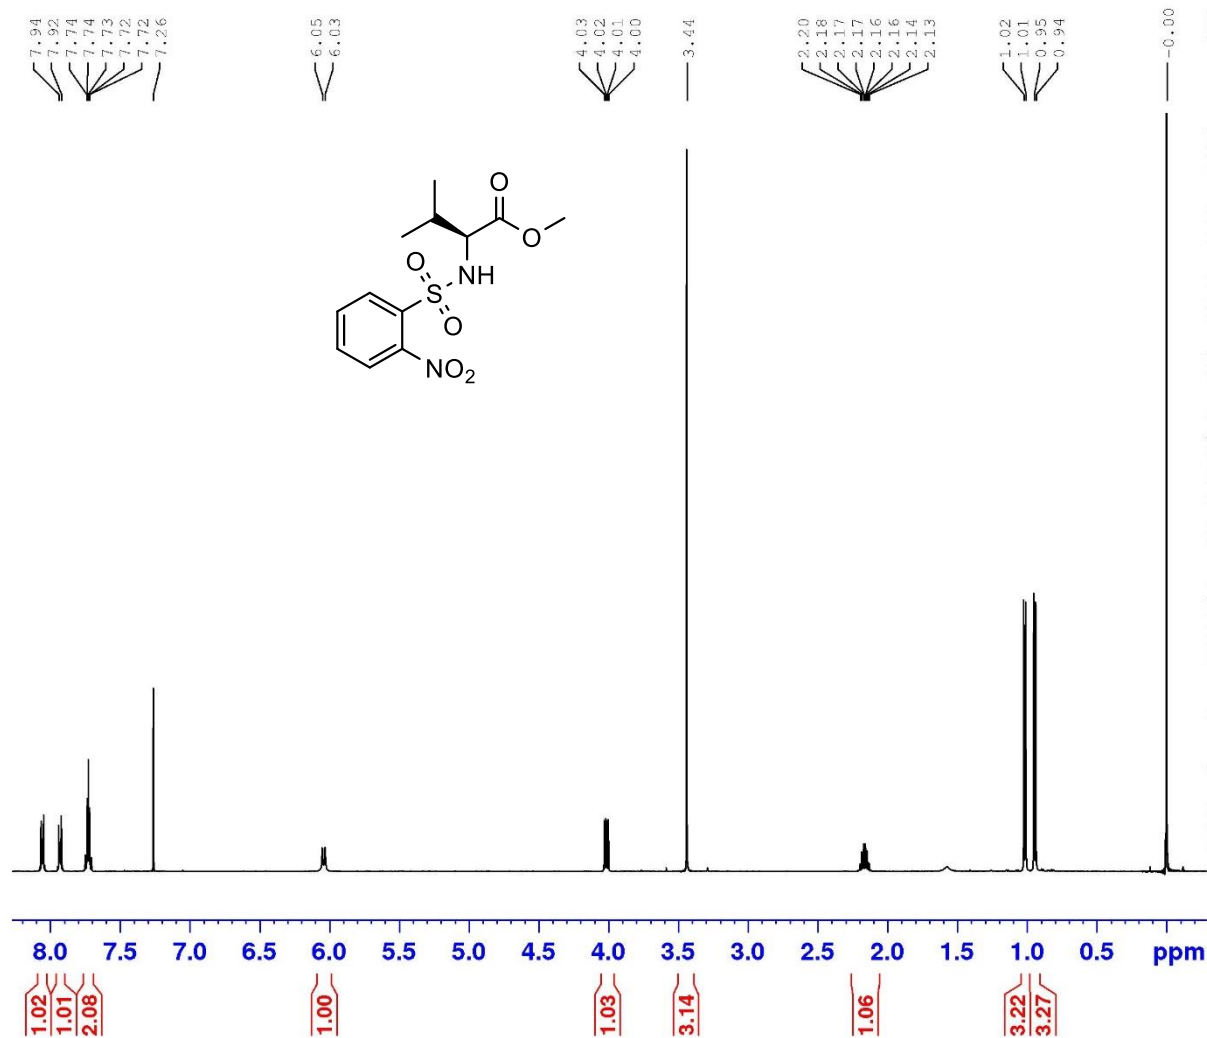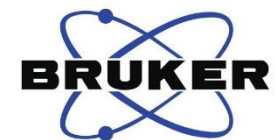

Current Data Parameters  
 NAME Apr06-2020  
 EXPNO 90  
 PROCNO 1

F2 - Acquisition Parameters  
 Date\_ 20200406  
 Time 22.46  
 INSTRUM spect  
 PROBHD 5 mm PABBO BB-  
 PULPROG zg30  
 TD 32768  
 SOLVENT CDCl<sub>3</sub>  
 NS 32  
 DS 0  
 SWH 10330.578 Hz  
 FIDRES 0.315264 Hz  
 AQ 1.5859712 sec  
 RG 456  
 DW 48.400 usec  
 DE 10.00 usec  
 TE 296.0 K  
 D1 2.00000000 sec  
 TD0 1

===== CHANNEL f1 =====  
 NUC1 1H  
 P1 11.23 usec  
 PL1 1.00 dB  
 PL1W 19.75309753 W  
 SFO1 500.1560886 MHz

F2 - Processing parameters  
 SI 65536  
 SF 500.1530148 MHz  
 WDW no  
 SSB 0  
 LB 0 Hz  
 GB 0  
 PC 1.00

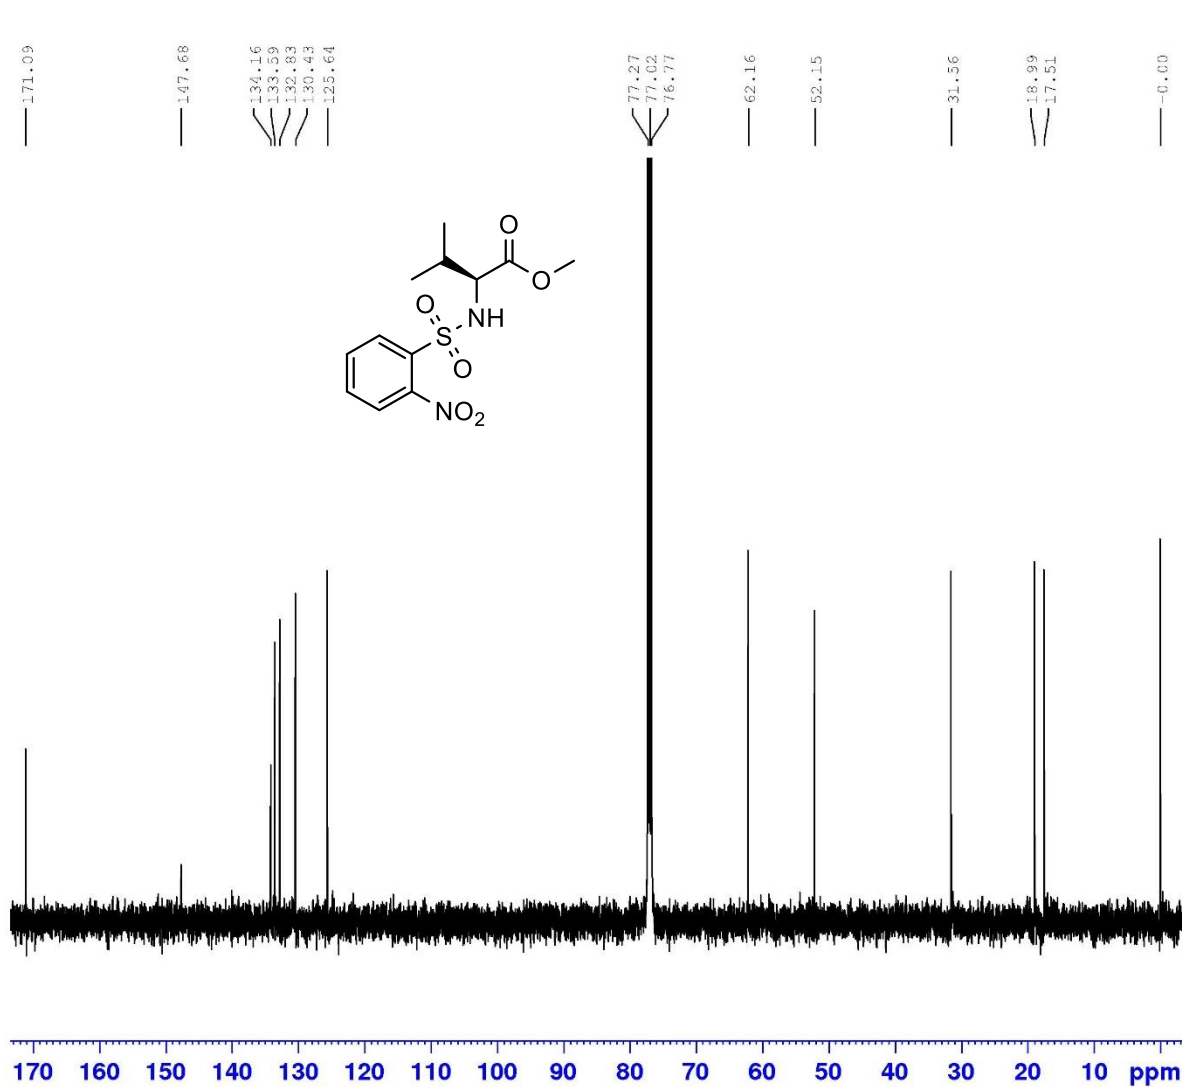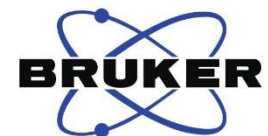

Current Data Parameters  
 NAME Apr06-2020  
 EXPNO 91  
 PROCNO 1

F2 - Acquisition Parameters  
 Date\_ 20200406  
 Time 23.39  
 INSTRUM spect  
 PROBHD 5 mm PABBO BB-  
 PULPROG zgpg30  
 TD 65536  
 SOLVENT CDCl3  
 NS 1024  
 DS 4  
 SWH 32894.738 Hz  
 FIDRES 0.501934 Hz  
 AQ 0.9961472 sec  
 RG 2580  
 DW 15.200 usec  
 DE 10.00 usec  
 TE 296.0 K  
 D1 2.00000000 sec  
 D11 0.03000000 sec  
 TD0 1

===== CHANNEL f1 =====  
 NUC1 13C  
 P1 10.20 usec  
 PL1 1.50 dB  
 PL1W 51.74793243 W  
 SFO1 125.7761482 MHz

===== CHANNEL f2 =====  
 CPDPRG2 waltz16  
 NUC2 1H  
 PCPD2 100.00 usec  
 PL2 1.00 dB  
 PL12 19.99 dB  
 PL13 21.00 dB  
 PL2W 19.75309753 W  
 PL12W 0.24925002 W  
 PL13W 0.19753097 W  
 SFO2 500.1550006 MHz

F2 - Processing parameters  
 SI 32768  
 SF 125.7635738 MHz  
 WDW EM  
 SSB 0  
 LB 1.00 Hz  
 GB 0  
 PC 1.40

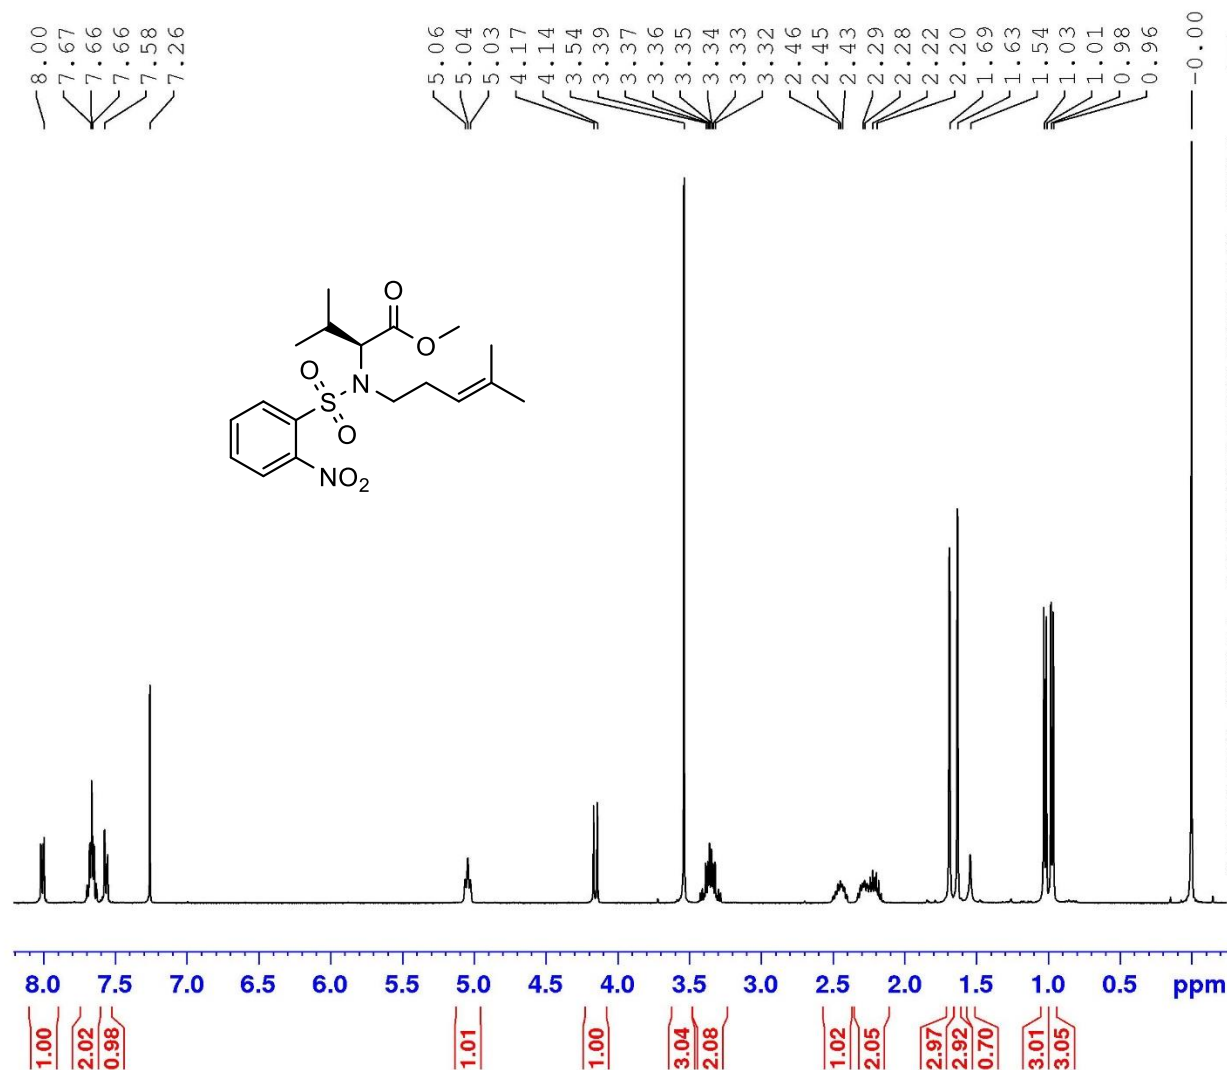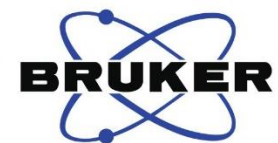

Current Data Parameters  
 NAME Jan07-2020  
 EXPNO 400  
 PROCNO 1

F2 - Acquisition Parameters  
 Date\_ 20200107  
 Time 17.23  
 INSTRUM spect  
 PROBHD 5 mm PABBO BB/  
 PULPROG zg30  
 TD 65536  
 SOLVENT CDCl<sub>3</sub>  
 NS 16  
 DS 2  
 SWH 8012.820 Hz  
 FIDRES 0.122266 Hz  
 AQ 4.0894465 sec  
 RG 205.35  
 DW 62.400 usec  
 DE 6.50 usec  
 TE 298.0 K  
 D1 1.00000000 sec  
 TD0 1

===== CHANNEL f1 =====  
 SFO1 400.1024708 MHz  
 NUC1 1H  
 P1 13.70 usec  
 PLW1 12.00000000 W

F2 - Processing parameters  
 SI 65536  
 SF 400.1000088 MHz  
 WDW EM  
 SSB 0  
 LB 0.30 Hz  
 GB 0  
 PC 1.00

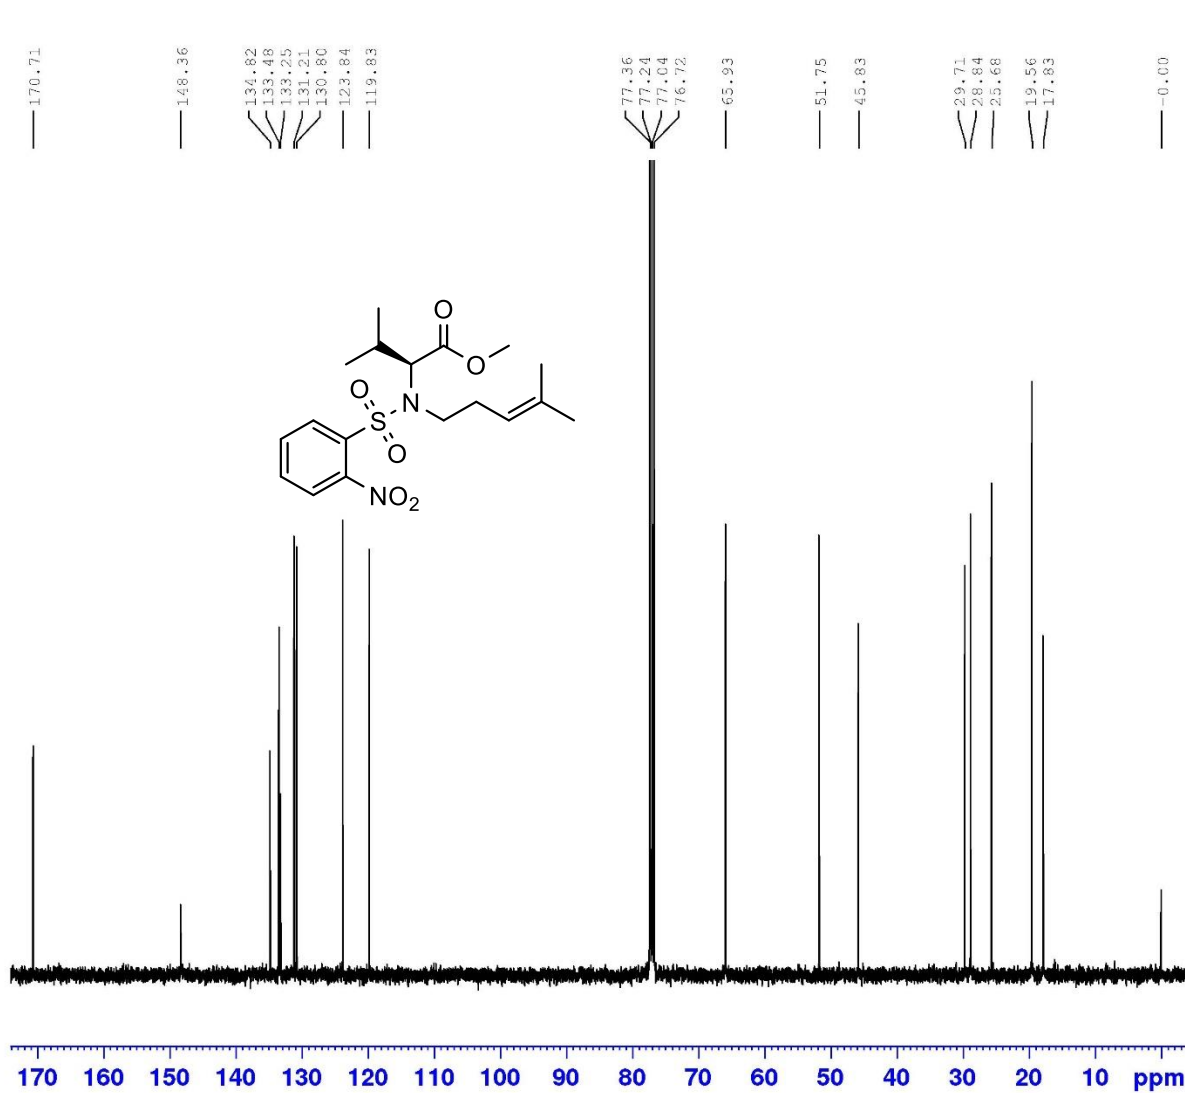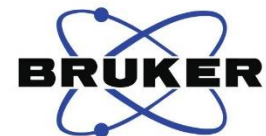

Current Data Parameters  
 NAME Jan14-2020  
 EXPNO 160  
 PROCNO 1

F2 - Acquisition Parameters  
 Date\_ 20200114  
 Time 20.33  
 INSTRUM spect  
 PROBHD 5 mm PABBO BB/  
 PULPROG zgpg30  
 TD 65536  
 SOLVENT CDCl3  
 NS 512  
 DS 4  
 SWH 24038.461 Hz  
 FIDRES 0.366798 Hz  
 AQ 1.3631488 sec  
 RG 205.35  
 DW 20.800 usec  
 DE 6.50 usec  
 TE 298.0 K  
 D1 2.00000000 sec  
 D11 0.03000000 sec  
 TDC 1

===== CHANNEL f1 =====  
 SFO1 100.6152851 MHz  
 NUC1 13C  
 P1 10.00 usec  
 PLW1 48.00000000 W

===== CHANNEL f2 =====  
 SFO2 400.1016004 MHz  
 NUC2 1H  
 CPDPRG[2] waltz16  
 PCPD2 90.00 usec  
 PLW2 12.00000000 W  
 PLW12 0.27805999 W  
 PLW13 0.22522999 W

F2 - Processing parameters  
 SI 32768  
 SF 100.6052239 MHz  
 WDW EM  
 SSB 0  
 LB 1.00 Hz  
 GB 0  
 PC 1.40

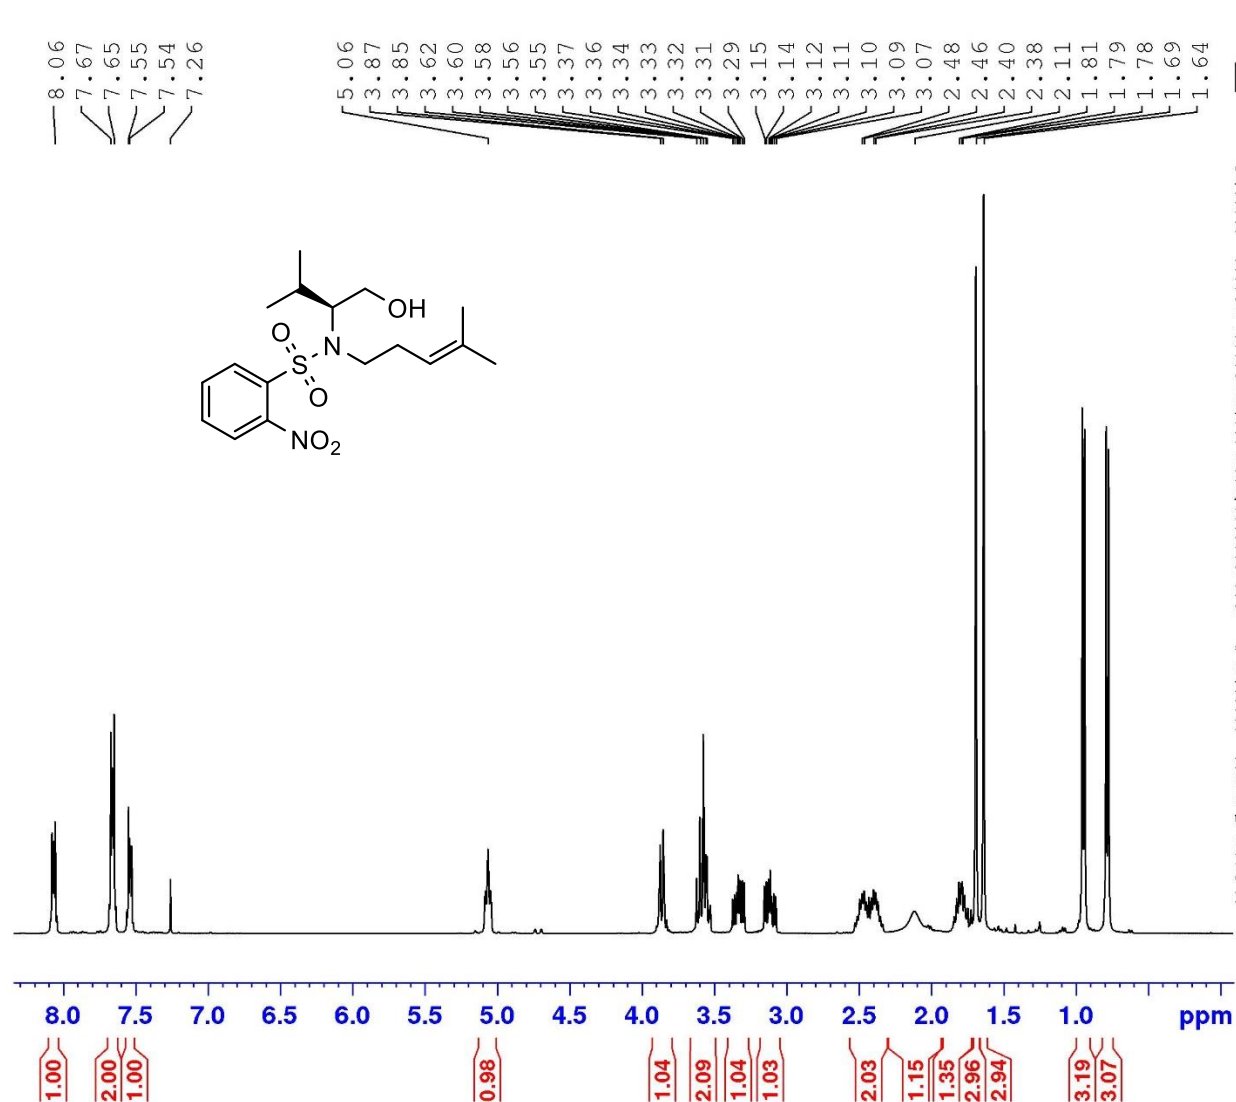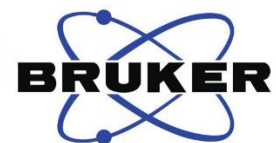

Current Data Parameters  
 NAME Feb10-2020  
 EXPNO 360  
 PROCNO 1

F2 - Acquisition Parameters  
 Date\_ 20200210  
 Time 15.26  
 INSTRUM spect  
 PROBHD 5 mm PABBO BB/  
 PULPROG zg30  
 TD 65536  
 SOLVENT CDCl<sub>3</sub>  
 NS 16  
 DS 2  
 SWH 8012.820 Hz  
 FIDRES 0.122266 Hz  
 AQ 4.0894465 sec  
 RG 68.93  
 DW 62.400 usec  
 DE 6.50 usec  
 TE 298.0 K  
 D1 1.00000000 sec  
 TD0 1

===== CHANNEL f1 =====  
 SF01 400.1024708 MHz  
 NUC1 1H  
 P1 13.70 usec  
 PLW1 12.00000000 W

F2 - Processing parameters  
 SI 65536  
 SF 400.1000092 MHz  
 WDW EM  
 SSB 0  
 LB 0.30 Hz  
 GB 0  
 PC 1.00

<sup>1</sup>H-NMR 28a

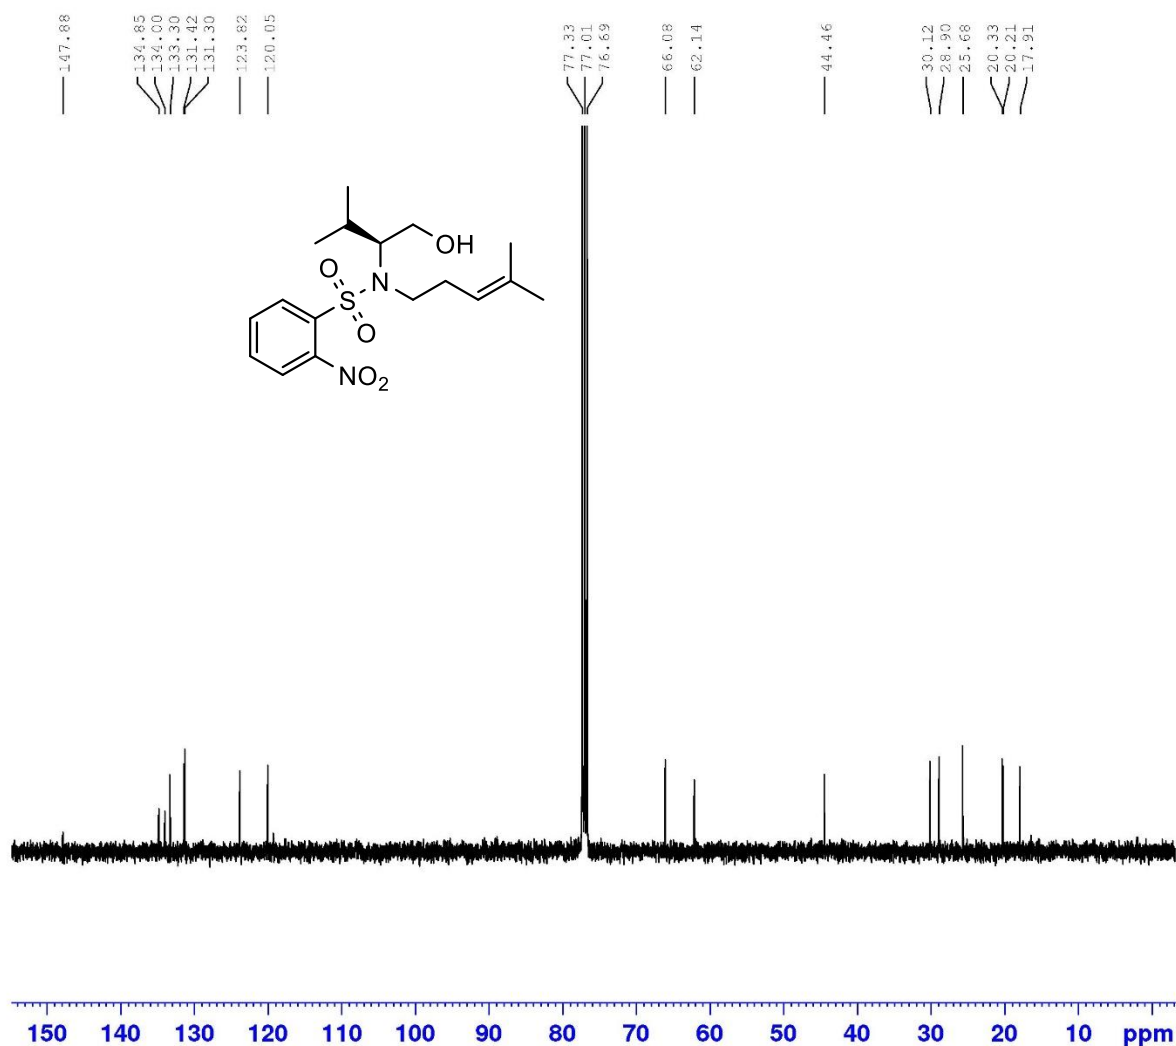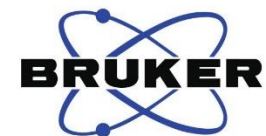

Current Data Parameters  
 NAME Jan20-2020  
 EXPNO 731  
 PROCNO 1

F2 - Acquisition Parameters  
 Date\_ 20200120  
 Time 22.51  
 INSTRUM spect  
 PROBHD 5 mm PABBO BB/  
 PULPROG zgpg30  
 TD 65536  
 SOLVENT CDCl3  
 NS 512  
 DS 4  
 SWE 24038.461 Hz  
 FIDRES 0.366798 Hz  
 AQ 1.3631488 sec  
 RG 205.35  
 DW 20.800 usec  
 DE 6.50 usec  
 TE 298.0 K  
 D1 2.00000000 sec  
 D11 0.03000000 sec  
 TD0 1

===== CHANNEL f1 =====  
 SFO1 100.6152851 MHz  
 NUC1 13C  
 P1 10.00 usec  
 PLW1 48.00000000 W

===== CHANNEL f2 =====  
 SFO2 400.1016004 MHz  
 NUC2 1H  
 CPDPRG[2] waltz16  
 PCPD2 90.00 usec  
 PLW2 12.00000000 W  
 PLW12 0.27805999 W  
 PLW13 0.22522999 W

F2 - Processing parameters  
 SI 32768  
 SF 100.6052250 MHz  
 WDW EM  
 SSB 0  
 LB 1.00 Hz  
 GB 0  
 PC 1.40

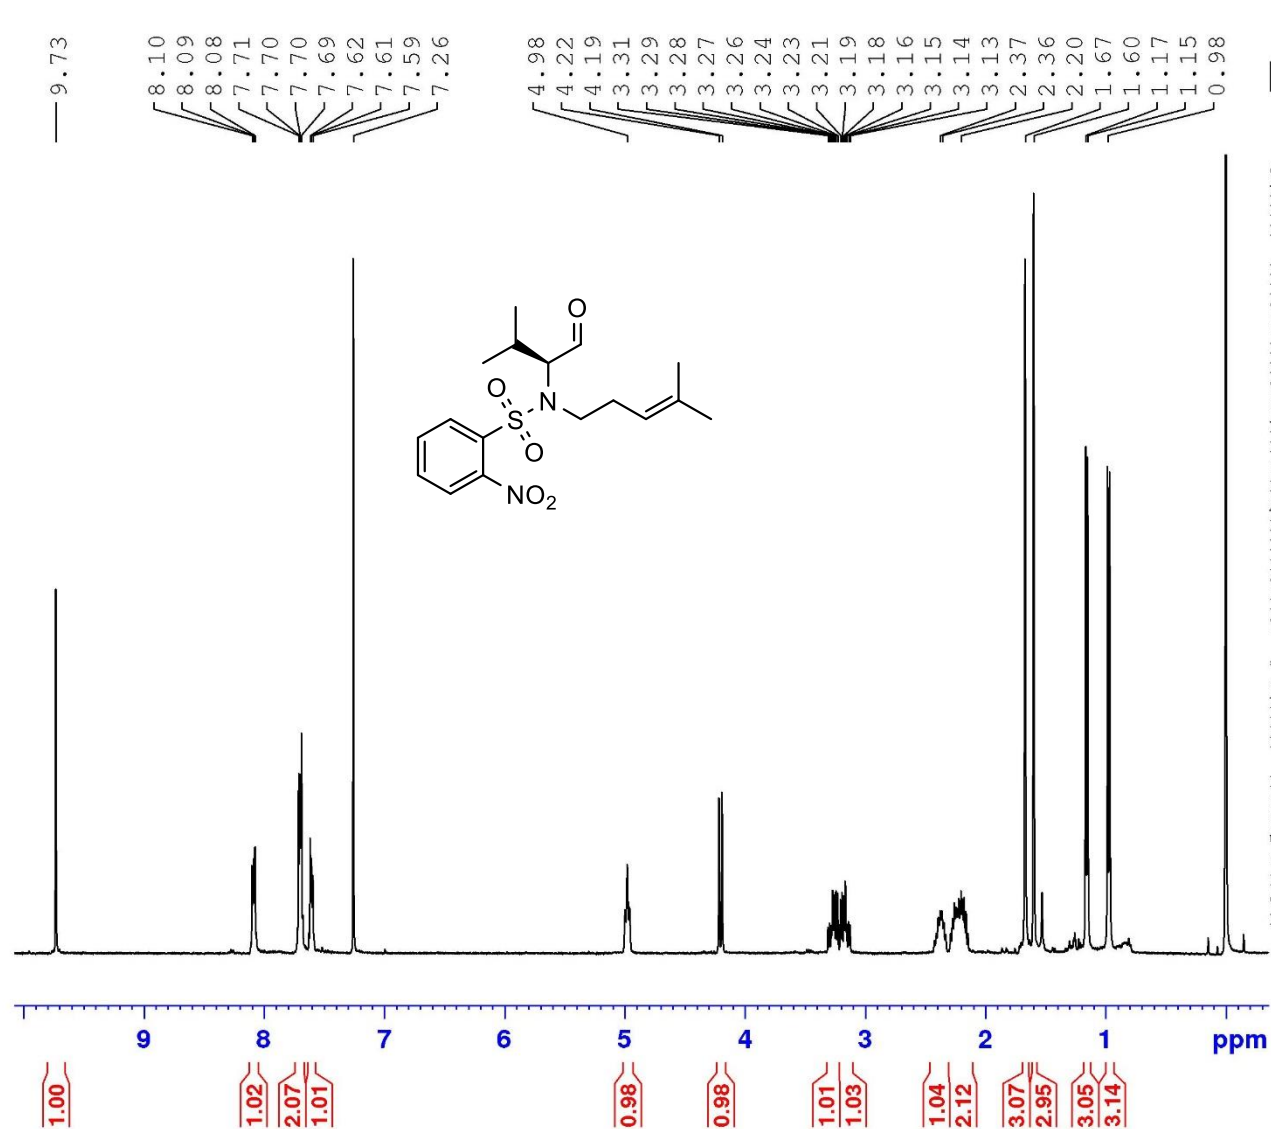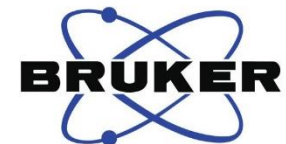

Current Data Parameters  
 NAME Oct23-2018  
 EXPNO 260  
 PROCNO 1

F2 - Acquisition Parameters  
 Date\_ 20181023  
 Time 13.17  
 INSTRUM spect  
 PROBHD 5 mm PABBO BB/  
 PULPROG zg30  
 TD 65536  
 SOLVENT CDCl3  
 NS 16  
 DS 2  
 SWH 8012.820 Hz  
 FIDRES 0.122266 Hz  
 AQ 4.0894465 sec  
 RG 205.35  
 DW 62.400 usec  
 DE 6.50 usec  
 TE 298.0 K  
 D1 1.00000000 sec  
 TD0 1

===== CHANNEL f1 =====  
 SFO1 400.1024708 MHz  
 NUC1 1H  
 P1 13.70 usec  
 PLW1 12.00000000 W

F2 - Processing parameters  
 SI 65536  
 SF 400.1000102 MHz  
 WDW EM  
 SSB 0  
 LB 0.30 Hz  
 GB 0  
 PC 1.00

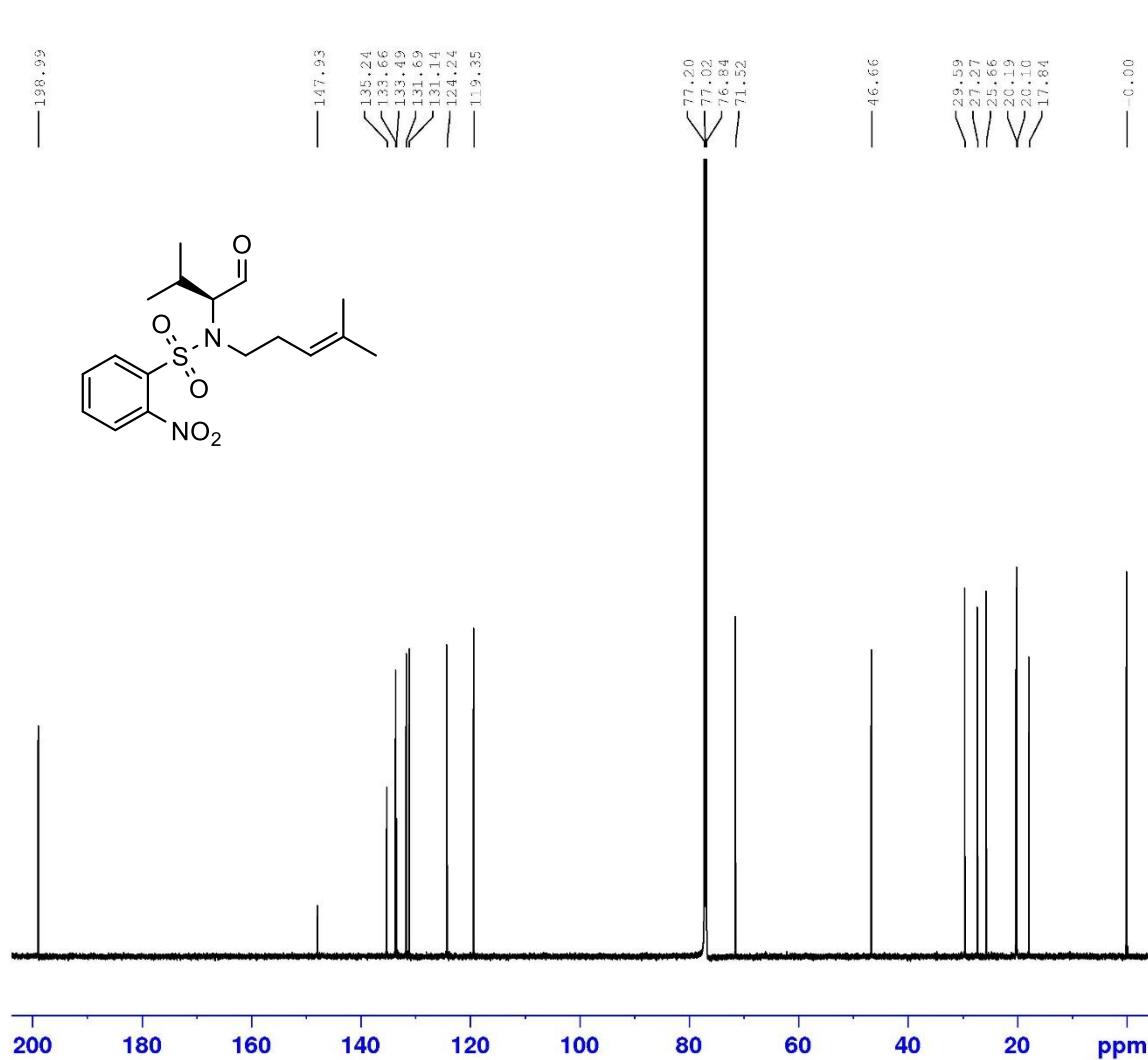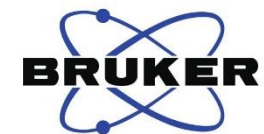

Current Data Parameters  
 NAME Oct25-2018  
 EXPNO 31  
 PROCNO 1

F2 - Acquisition Parameters  
 Date\_ 20181025  
 Time 13.07  
 INSTRUM spect  
 PROBHD 5 mm CPQCI 1H-  
 PULPROG zgpg30  
 TD 65356  
 SOLVENT CDCl3  
 NS 1024  
 DS 4  
 SWH 40760.871 Hz  
 FIDRES 0.623675 Hz  
 AQ 0.8017003 sec  
 RG 182.53  
 DW 12.267 usec  
 DE 18.00 usec  
 TE 298.0 K  
 D1 2.00000000 sec  
 D11 0.03000000 sec  
 TD0 1

===== CHANNEL f1 =====  
 SFO1 176.1232717 MHz  
 NUC1 13C  
 P1 12.00 usec  
 PLW1 105.00000000 W

===== CHANNEL f2 =====  
 SFO2 700.3628014 MHz  
 NUC2 1H  
 CPDPRG[2] waltz16  
 PCPD2 65.00 usec  
 PLW2 9.89999962 W  
 PLW12 0.15564001 W  
 PLW13 0.07837200 W

F2 - Processing parameters  
 SI 131072  
 SF 176.1056634 MHz  
 WDW EM  
 SSB 0  
 LB 1.00 Hz  
 GB 0  
 PC 1.40

8.13  
8.12  
7.64  
7.63  
7.62  
7.54  
7.53  
7.52  
7.26

4.94  
4.94  
4.68  
4.10  
4.09  
4.09  
4.07  
4.05  
3.70  
3.68  
3.13  
3.13  
3.10  
3.10  
3.08  
3.07  
2.27  
2.25  
2.07  
2.06  
2.05  
2.05  
2.04  
2.03  
1.98  
1.88  
1.87  
1.85  
1.84  
1.83  
1.82  
1.80  
1.79  
1.77  
1.43  
1.42  
1.40  
1.40  
1.04  
1.03  
0.87

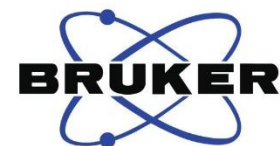

Current Data Parameters  
NAME Dec19-2019  
EXPNO 60  
PROCNO 1

F2 - Acquisition Parameters  
Date\_ 20191219  
Time 16.08  
INSTRUM spect  
PROBHD 5 mm PABBO BB-  
PULPROG zg30  
TD 32768  
SOLVENT CDCl3  
NS 32  
DS 0  
SWH 10330.578 Hz  
FIDRES 0.315264 Hz  
AQ 1.5859712 sec  
RG 362  
DW 48.400 usec  
DE 10.00 usec  
TE 296.0 K  
D1 2.00000000 sec  
TD0 1

===== CHANNEL f1 =====  
NUC1 1H  
P1 11.23 usec  
PL1 1.00 dB  
PL1W 19.75309753 W  
SFO1 500.1560886 MHz

F2 - Processing parameters  
SI 16384  
SF 500.1530149 MHz  
WDW EM  
SSB 0  
LB 0.30 Hz  
GB 0  
PC 1.00

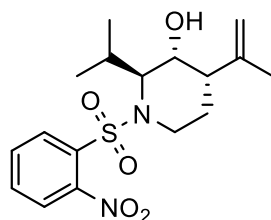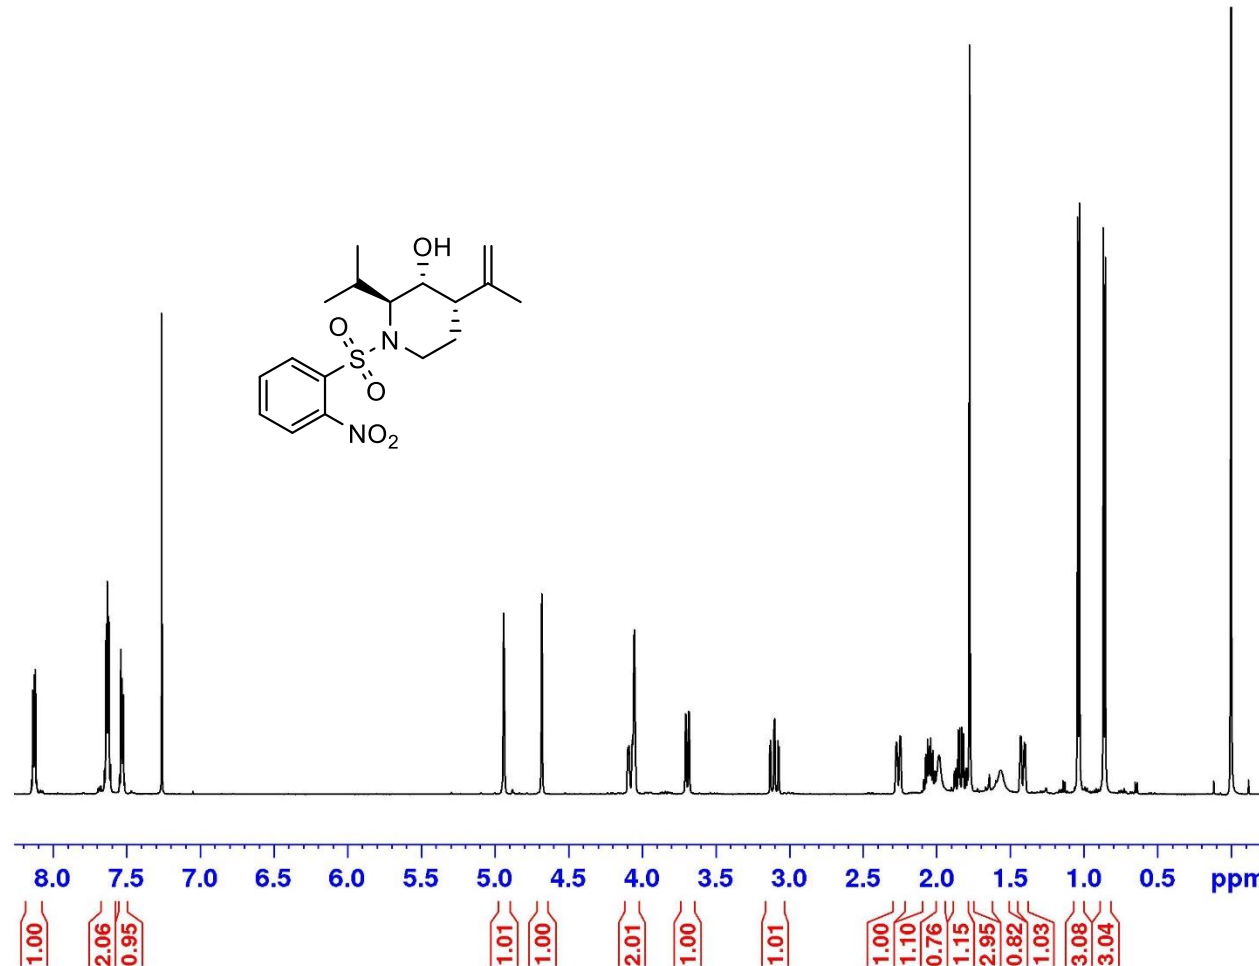

<sup>1</sup>H-NMR (R,S)-30a

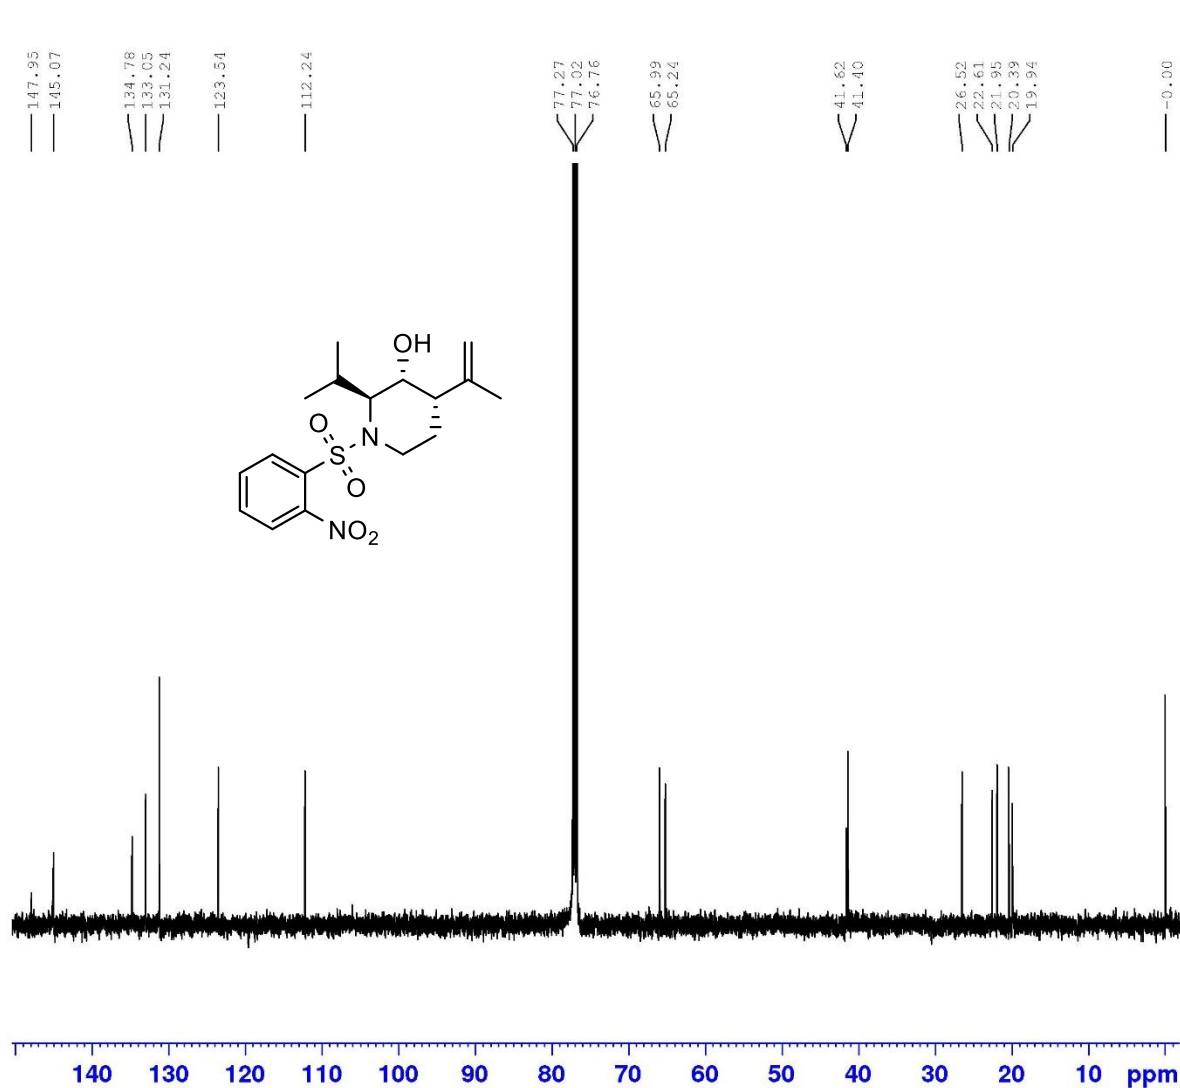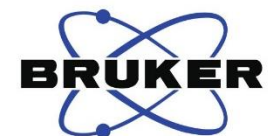

Current Data Parameters  
 NAME Dec19-2019  
 EXPNO 61  
 PROCNO 1

F2 - Acquisition Parameters  
 Date\_ 20191219  
 Time 17.01  
 INSTRUM spect  
 PROBHD 5 mm PABBO BB-  
 PULPROG zgpg30  
 TD 65536  
 SOLVENT CDCL3  
 NS 1024  
 DS 4  
 SWH 32894.738 Hz  
 FIDRES 0.501934 Hz  
 AQ 0.9961472 sec  
 RG 2300  
 DW 15.200 usec  
 DE 10.00 usec  
 TE 296.0 K  
 D1 2.00000000 sec  
 D11 0.03000000 sec  
 TD0 1

===== CHANNEL f1 =====  
 NUC1 13C  
 P1 10.20 usec  
 PL1 1.50 dB  
 PL1W 51.74793243 W  
 SFO1 125.7761482 MHz

===== CHANNEL f2 =====  
 CPDPRG[2] waltz16  
 NUC2 1H  
 PCPD2 100.00 usec  
 PL2 1.00 dB  
 PL12 19.99 dB  
 PL13 21.00 dB  
 PL2W 19.75309753 W  
 PL12W 0.24925002 W  
 PL13W 0.19753097 W  
 SFO2 500.1550006 MHz

F2 - Processing parameters  
 SI 32768  
 SF 125.7635738 MHz  
 WDW EM  
 SSB 0  
 LB 1.00 Hz  
 GB 0  
 PC 1.40

<sup>13</sup>C-NMR (R,S)-30a

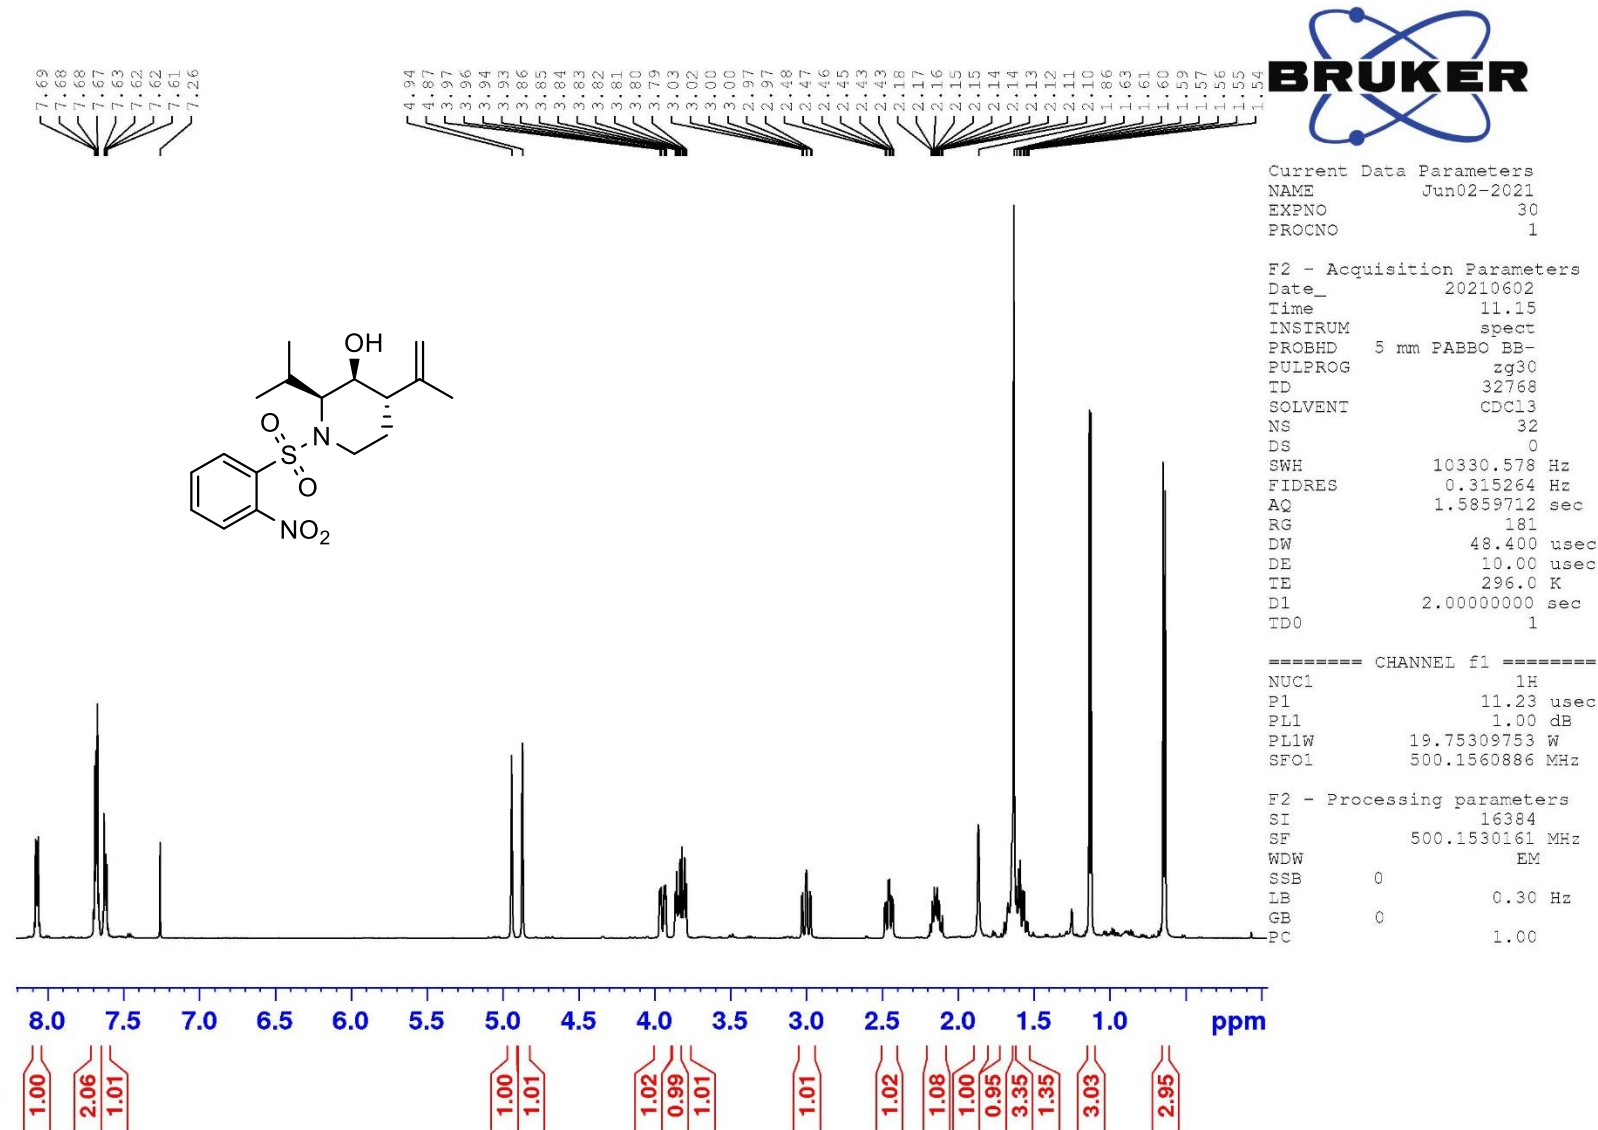

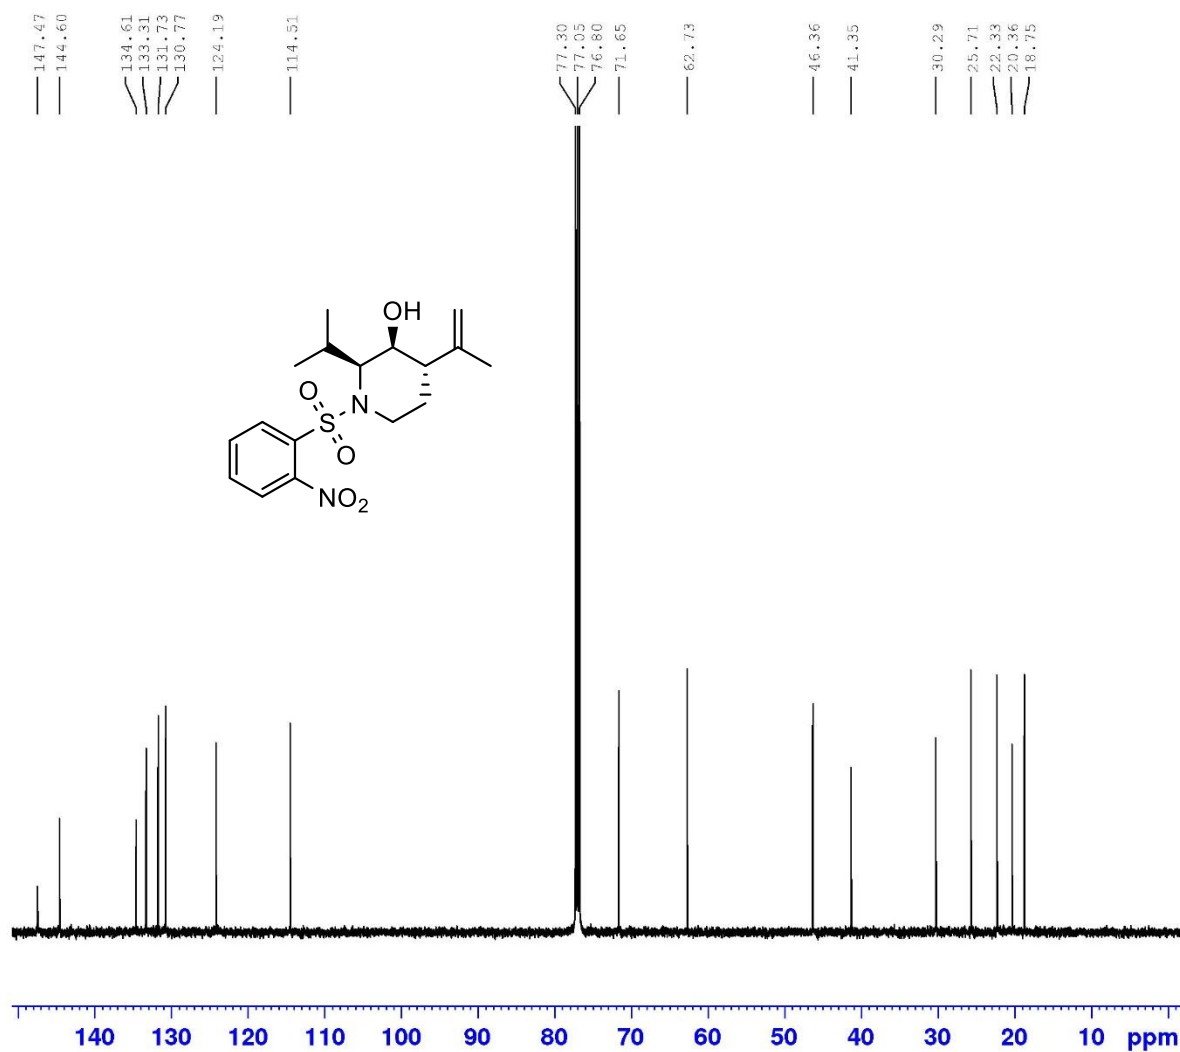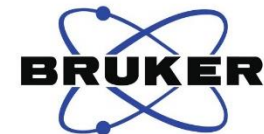

Current Data Parameters  
NAME Jun02-2021  
EXPNO 31  
PROCNO 1

F2 - Acquisition Parameters  
Date\_ 20210602  
Time 12.09  
INSTRUM spect  
PROBHD 5 mm PABBO BB-  
PULPROG zgpg30  
TD 65536  
SOLVENT CDCl3  
NS 1024  
DS 4  
SWH 32894.738 Hz  
FIDRES 0.501934 Hz  
AQ 0.9961472 sec  
RG 2580  
DW 15.200 usec  
DE 10.00 usec  
TE 296.0 K  
D1 2.0000000 sec  
D11 0.0300000 sec  
TD0 1

===== CHANNEL f1 =====  
NUC1 13C  
P1 10.20 usec  
PL1 1.50 dB  
PL1W 51.74793243 W  
SFO1 125.7761482 MHz

===== CHANNEL f2 =====  
CPDPRG2 waltz16  
NUC2 1H  
PCPD2 100.00 usec  
PL2 1.00 dB  
PL12 19.99 dB  
PL13 21.00 dB  
PL2W 19.75309753 W  
PL12W 0.24925002 W  
PL13W 0.19753097 W  
SFO2 500.1550006 MHz

F2 - Processing parameters  
SI 32768  
SF 125.7635720 MHz  
WDW EM  
SSB 0  
LB 1.00 Hz  
GB 0  
PC 1.40

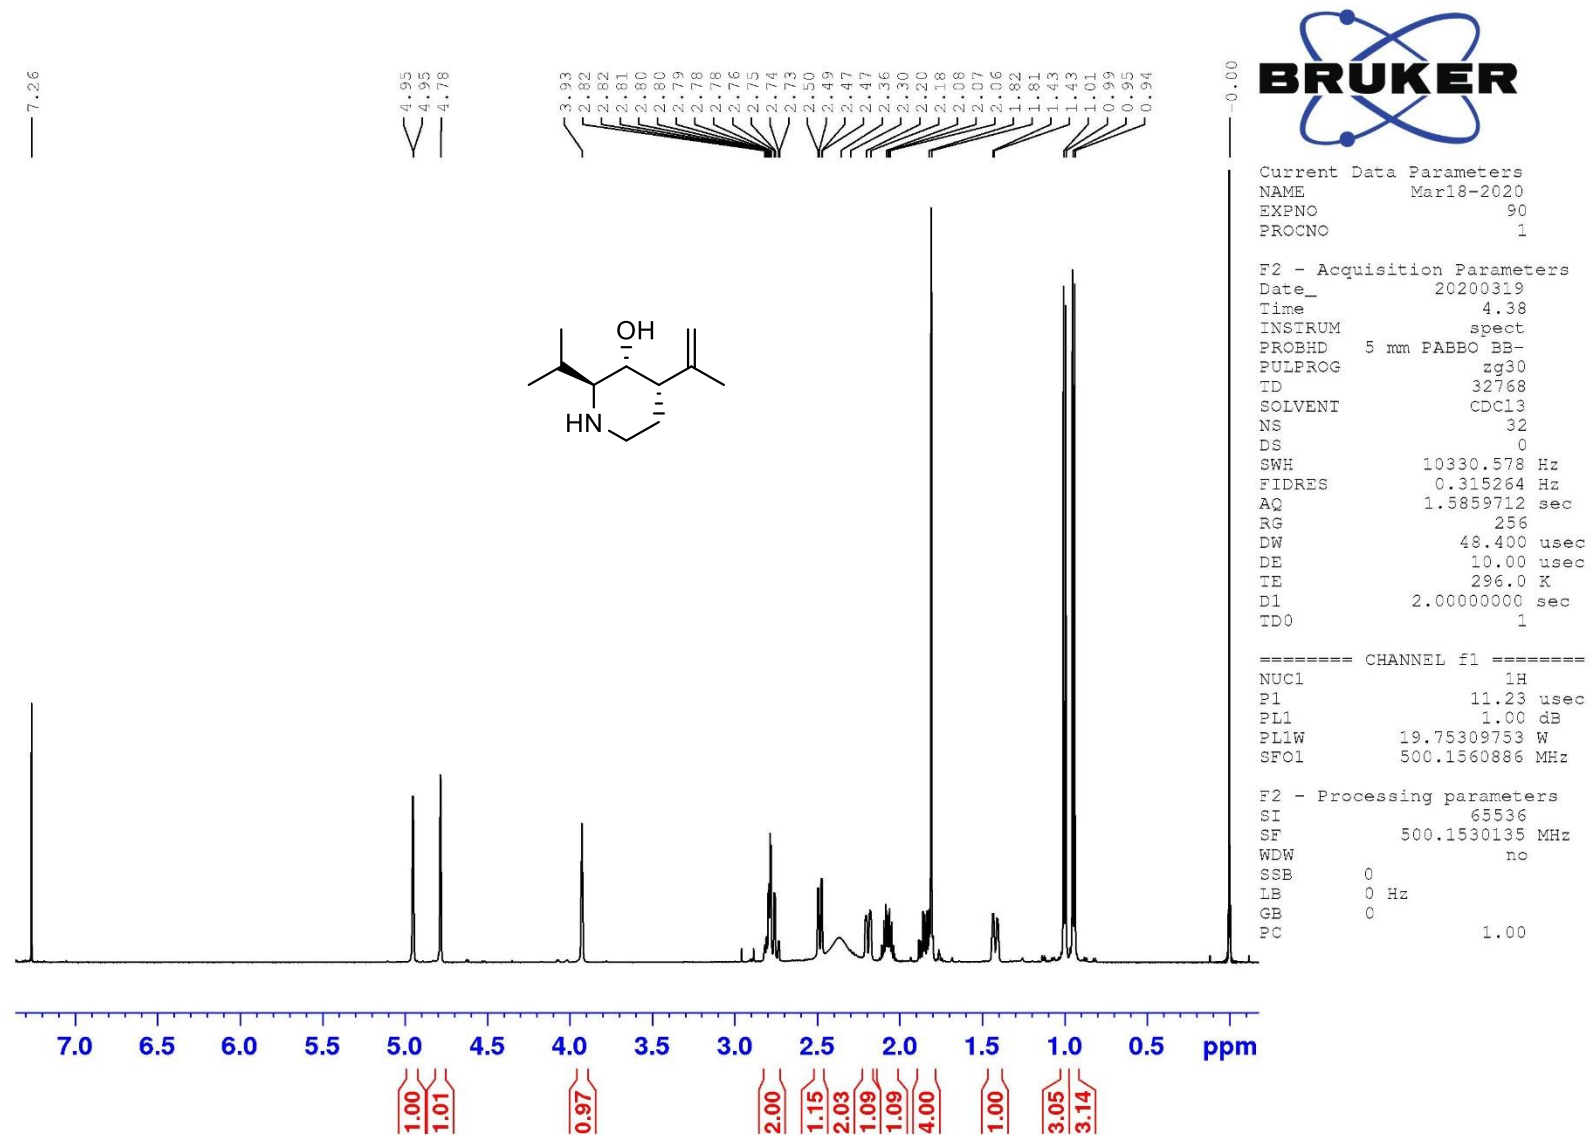

<sup>1</sup>H-NMR (R,S)-32a

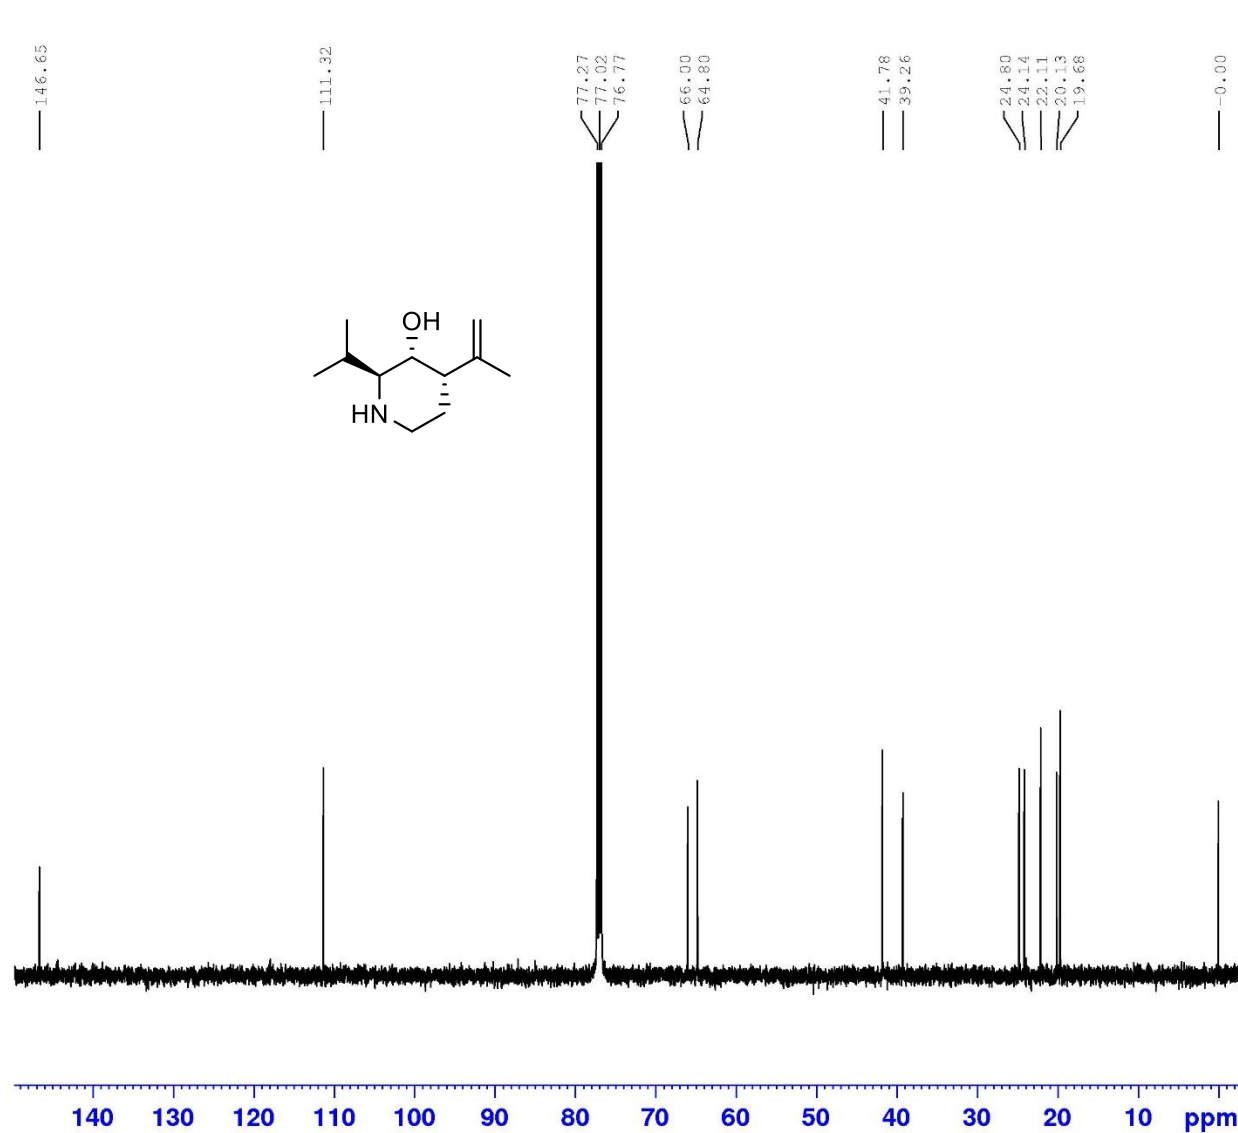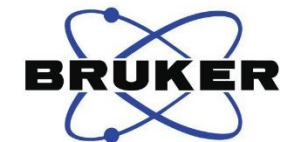

Current Data Parameters  
NAME Mar18-2020  
EXPNO 91  
PROCNO 1

F2 - Acquisition Parameters  
Date\_ 20200319  
Time 5.31  
INSTRUM spect  
PROBHD 5 mm PABBO BB-  
PULPROG zgpg30  
TD 65536  
SOLVENT CDC13  
NS 1024  
DS 4  
SWH 32894.738 Hz  
FIDRES 0.501934 Hz  
AQ 0.9961472 sec  
RG 2580  
DW 15.200 usec  
DE 10.00 usec  
TE 296.0 K  
D1 2.00000000 sec  
D11 0.03000000 sec  
TD0 1

===== CHANNEL f1 =====  
NUC1 13C  
P1 10.20 usec  
PL1 1.50 dB  
PL1W 51.74793243 W  
SFO1 125.7761482 MHz

===== CHANNEL f2 =====  
CPDPRG[2] waltz16  
NUC2 1H  
PCPD2 100.00 usec  
PL2 1.00 dB  
PL12 19.99 dB  
PL13 21.00 dB  
PL2W 19.75309753 W  
PL12W 0.24925002 W  
PL13W 0.19753097 W  
SFO2 500.1550006 MHz

F2 - Processing parameters  
SI 32768  
SF 125.7635736 MHz  
WDW EM  
SSB 0  
LB 1.00 Hz  
GB 0  
PC 1.40

<sup>13</sup>C-NMR (R,S)-32a

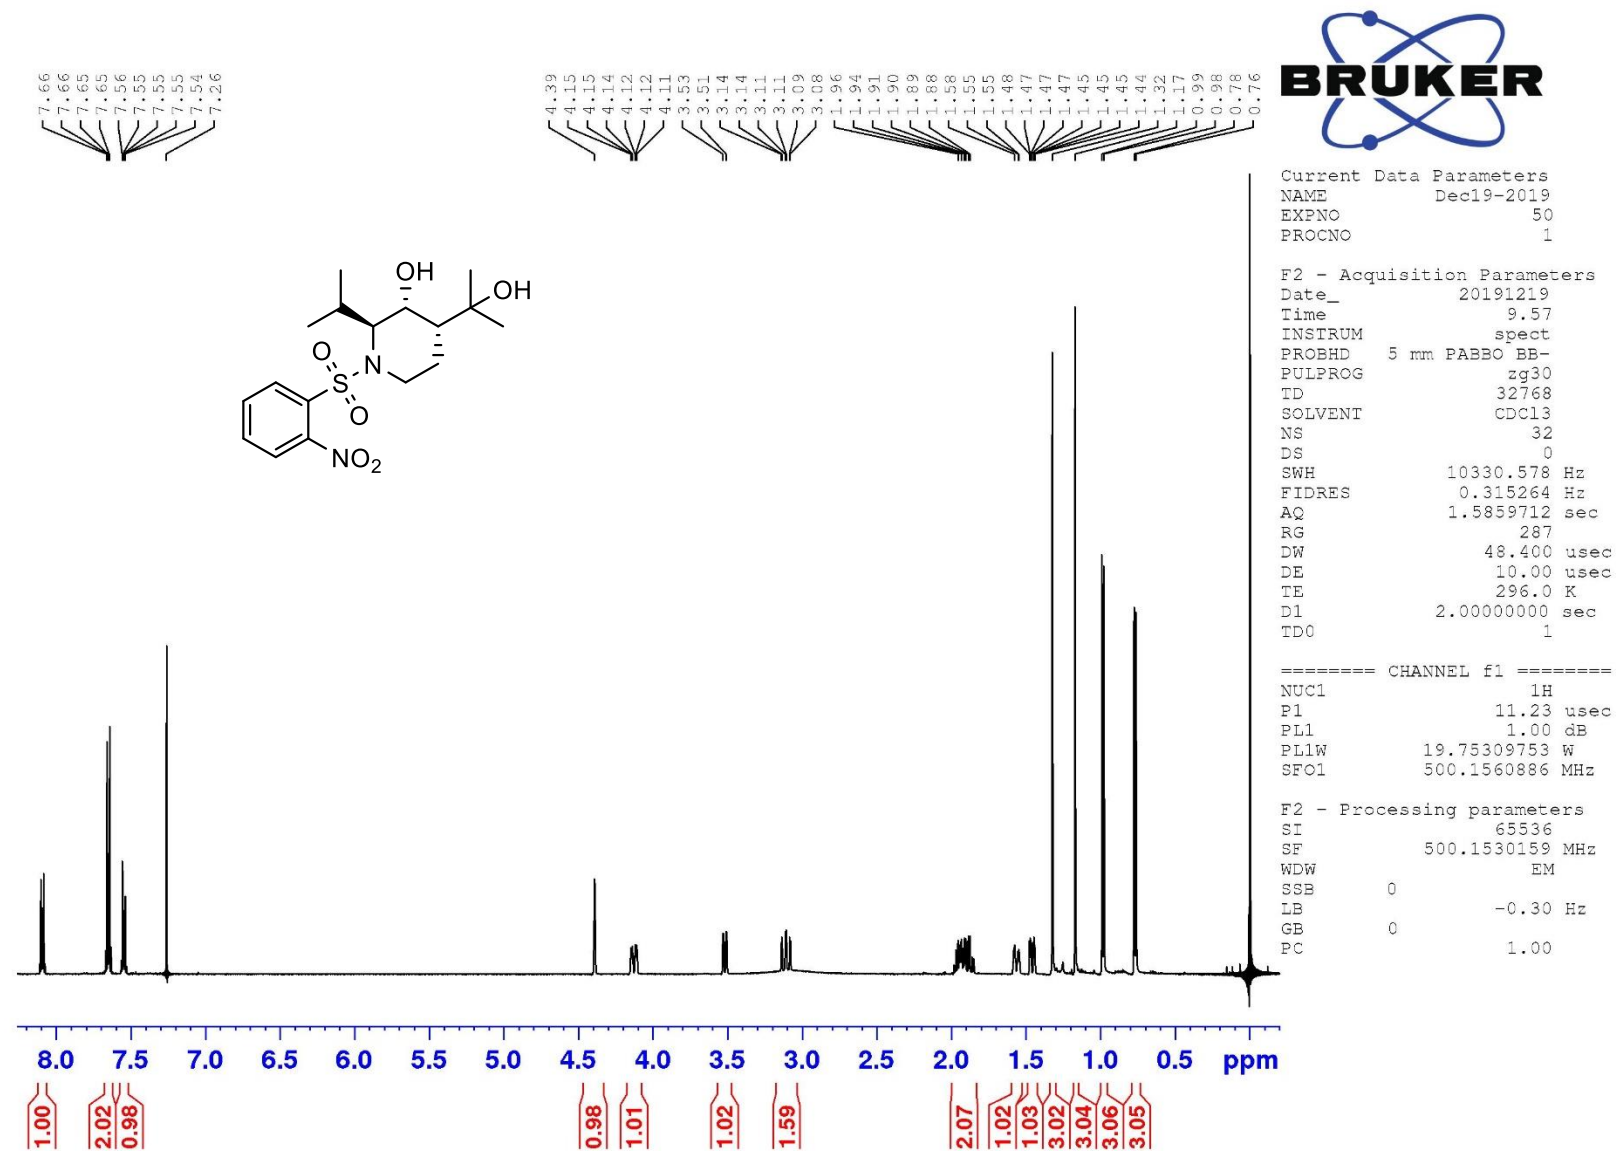

<sup>1</sup>H-NMR (R,R)-31a

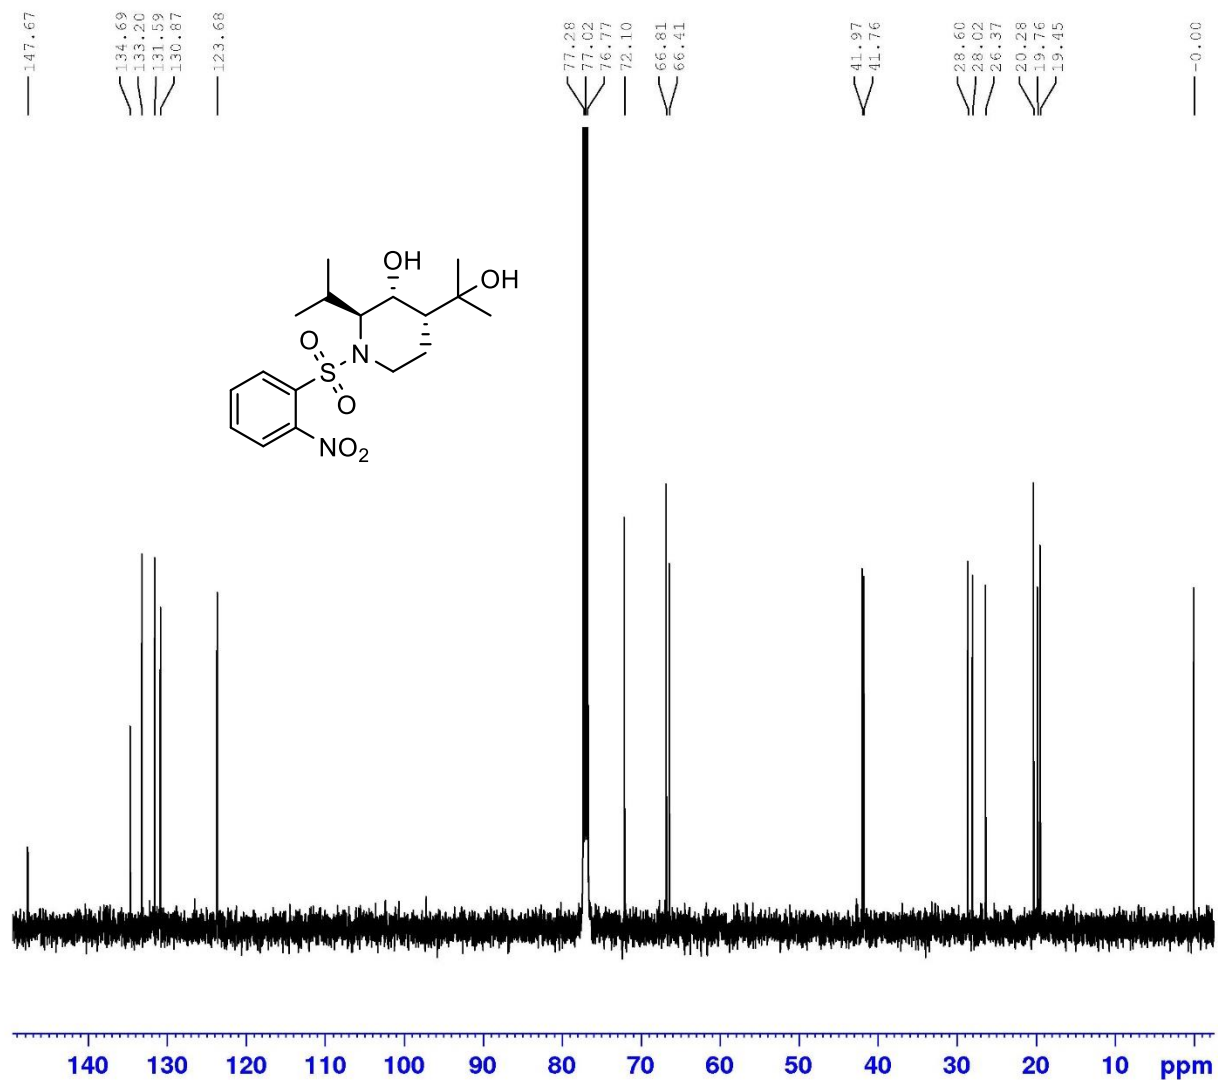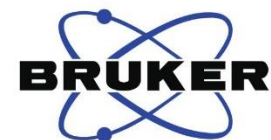

Current Data Parameters  
NAME Dec19-2019  
EXPNO 51  
PROCNO 1

F2 - Acquisition Parameters  
Date\_ 20191219  
Time 10.51  
INSTRUM spect  
PROBHD 5 mm PABBO BB-  
PULPROG zgpg30  
TD 65536  
SOLVENT CDCl3  
NS 1024  
DS 4  
SWH 32894.738 Hz  
FIDRES 0.501934 Hz  
AQ 0.9961472 sec  
RG 2580  
DW 15.200 usec  
DE 10.00 usec  
TE 296.0 K  
D1 2.00000000 sec  
D11 0.03000000 sec  
TD0 1

===== CHANNEL f1 =====  
NUC1 13C  
P1 10.20 usec  
PL1 1.50 dB  
PL1W 51.74793243 W  
SFO1 125.7761482 MHz

===== CHANNEL f2 =====  
CPDPRG[2] waltz16  
NUC2 1H  
PCPD2 100.00 usec  
PL2 1.00 dB  
PL12 19.99 dB  
PL13 21.00 dB  
PL2W 19.75309753 W  
PL12W 0.24925002 W  
PL13W 0.19753097 W  
SFO2 500.1550006 MHz

F2 - Processing parameters  
SI 32768  
SF 125.7635739 MHz  
WDW EM  
SSB 0  
LB 1.00 Hz  
GB 0  
PC 1.40

<sup>13</sup>C-NMR (R,R)-31a

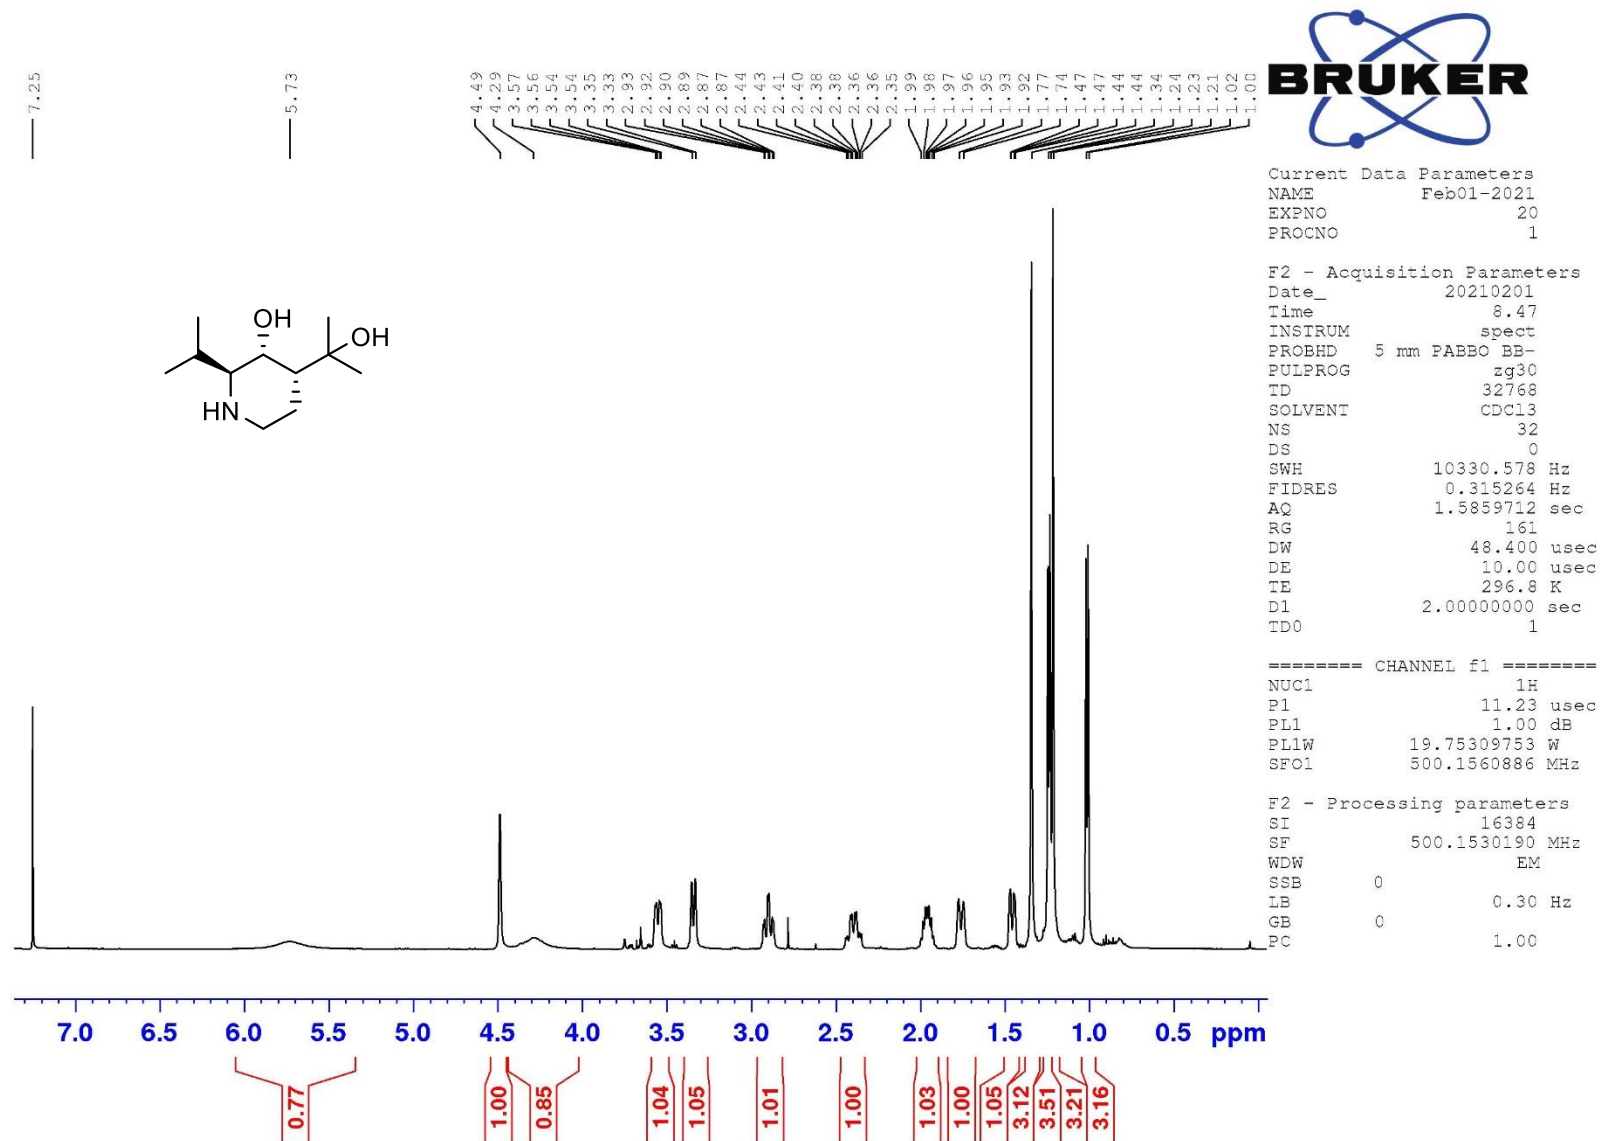

<sup>1</sup>H-NMR (*R,R*)-33a

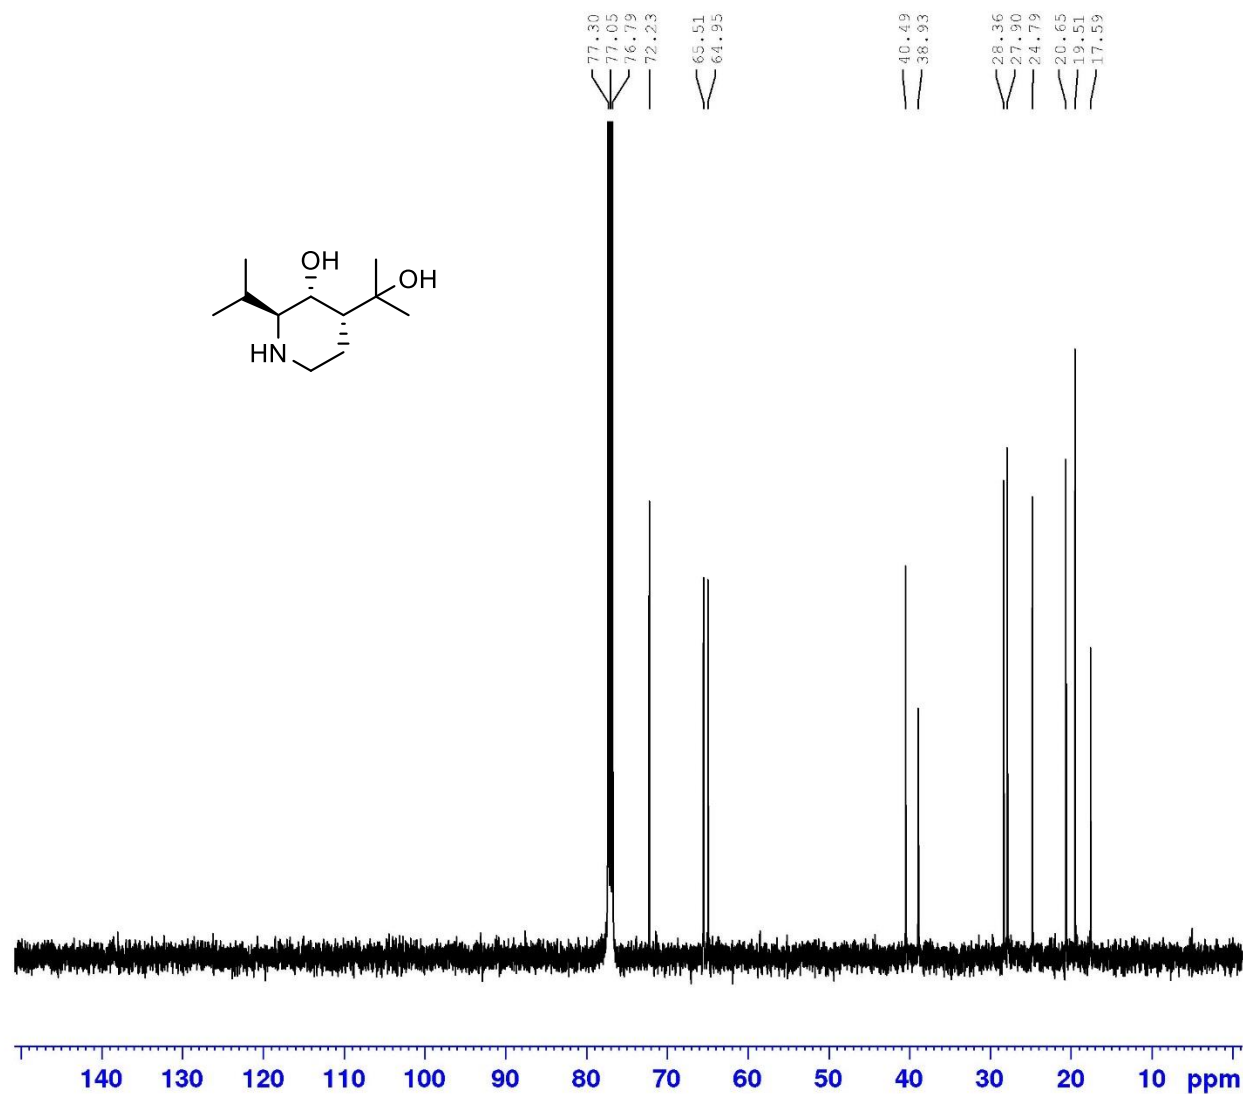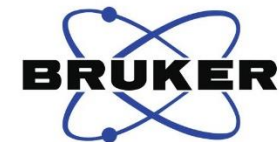

Current Data Parameters  
 NAME Feb01-2021  
 EXPNO 21  
 PROCNO 1

F2 - Acquisition Parameters  
 Date\_ 20210201  
 Time 9.41  
 INSTRUM spect  
 PROBHD 5 mm PABBO BB-  
 PULPROG zgpg30  
 TD 65536  
 SOLVENT CDCl3  
 NS 1024  
 DS 4  
 SWH 32894.738 Hz  
 FIDRES 0.501934 Hz  
 AQ 0.9961472 sec  
 RG 2580  
 DW 15.200 usec  
 DE 10.00 usec  
 TE 296.8 K  
 D1 2.00000000 sec  
 D11 0.03000000 sec  
 TD0 1

===== CHANNEL f1 =====  
 NUC1 13C  
 P1 10.20 usec  
 PL1 1.50 dB  
 PL1W 51.74793243 W  
 SFO1 125.7761482 MHz

===== CHANNEL f2 =====  
 CPDPRG[2] waltz16  
 NUC2 1H  
 PCPD2 100.00 usec  
 PL2 1.00 dB  
 PL12 19.99 dB  
 PL13 21.00 dB  
 PL2W 19.75309753 W  
 PL12W 0.24925002 W  
 PL13W 0.19753097 W  
 SFO2 500.1350006 MHz

F2 - Processing parameters  
 SI 32768  
 SF 125.7635720 MHz  
 WDW EM  
 SSB 0  
 LB 1.00 Hz  
 GB 0  
 PC 1.40

<sup>13</sup>C-NMR (R,R)-31a

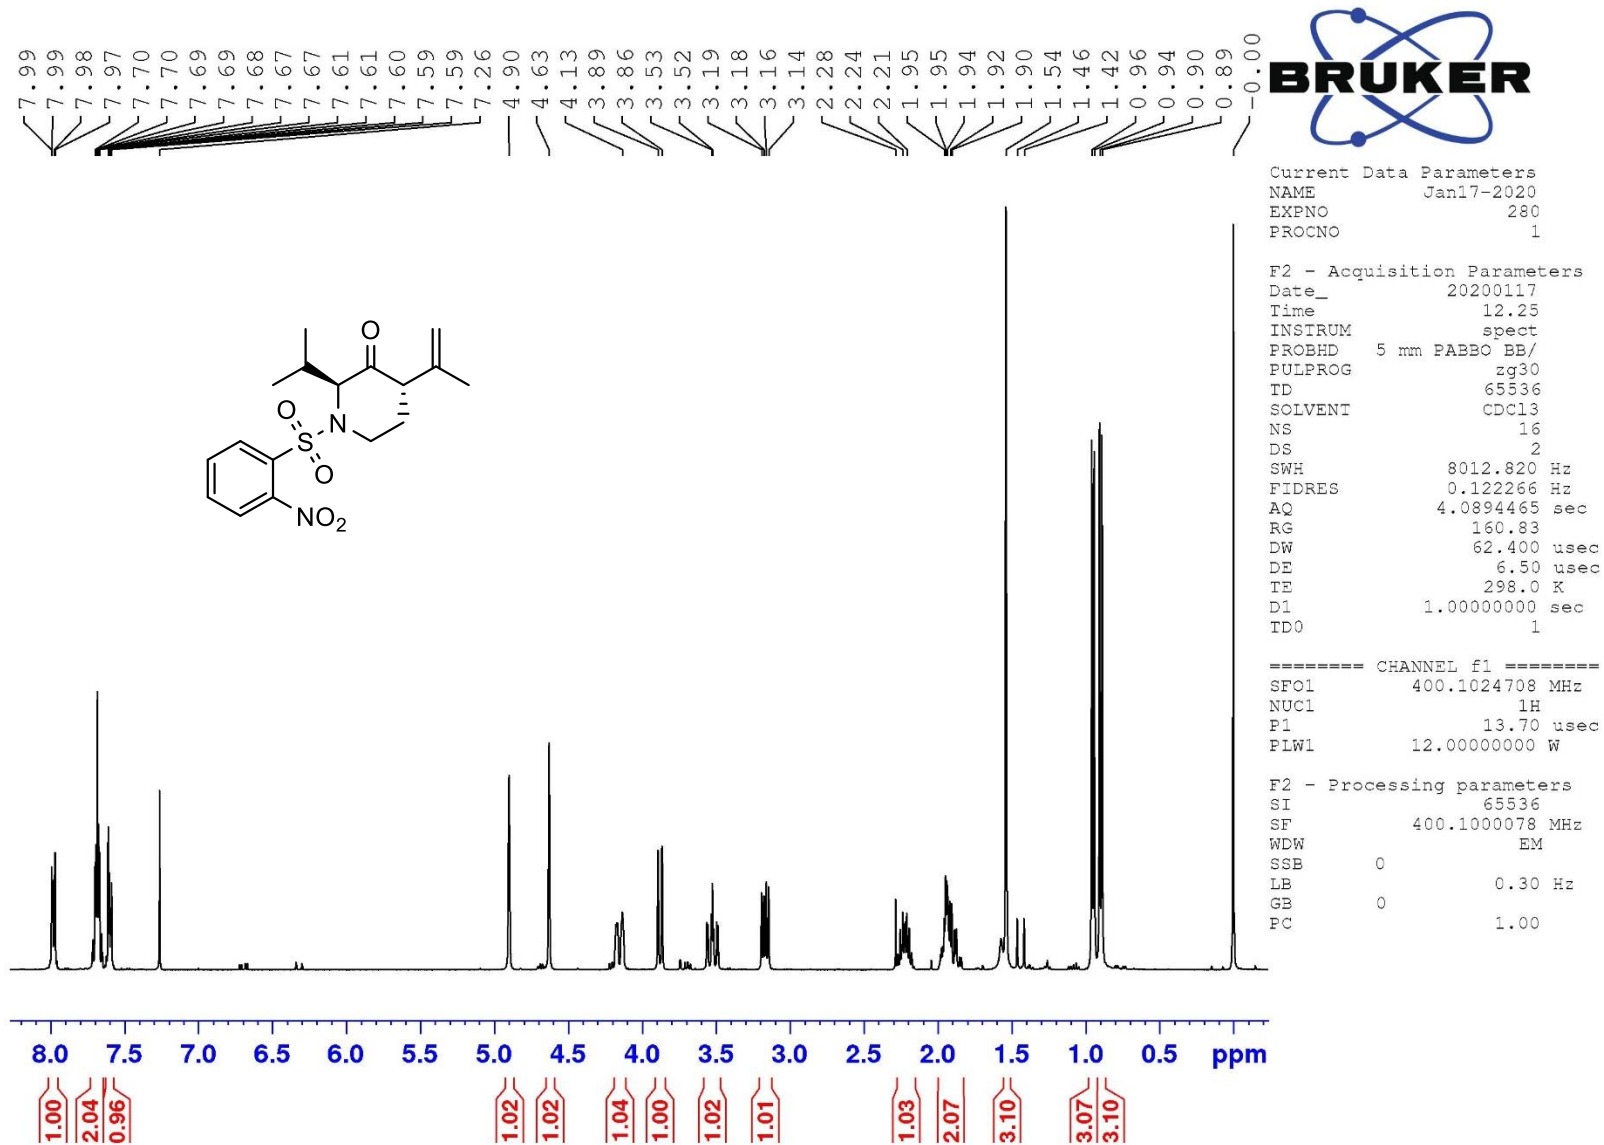

<sup>1</sup>H-NMR (S)-S2a

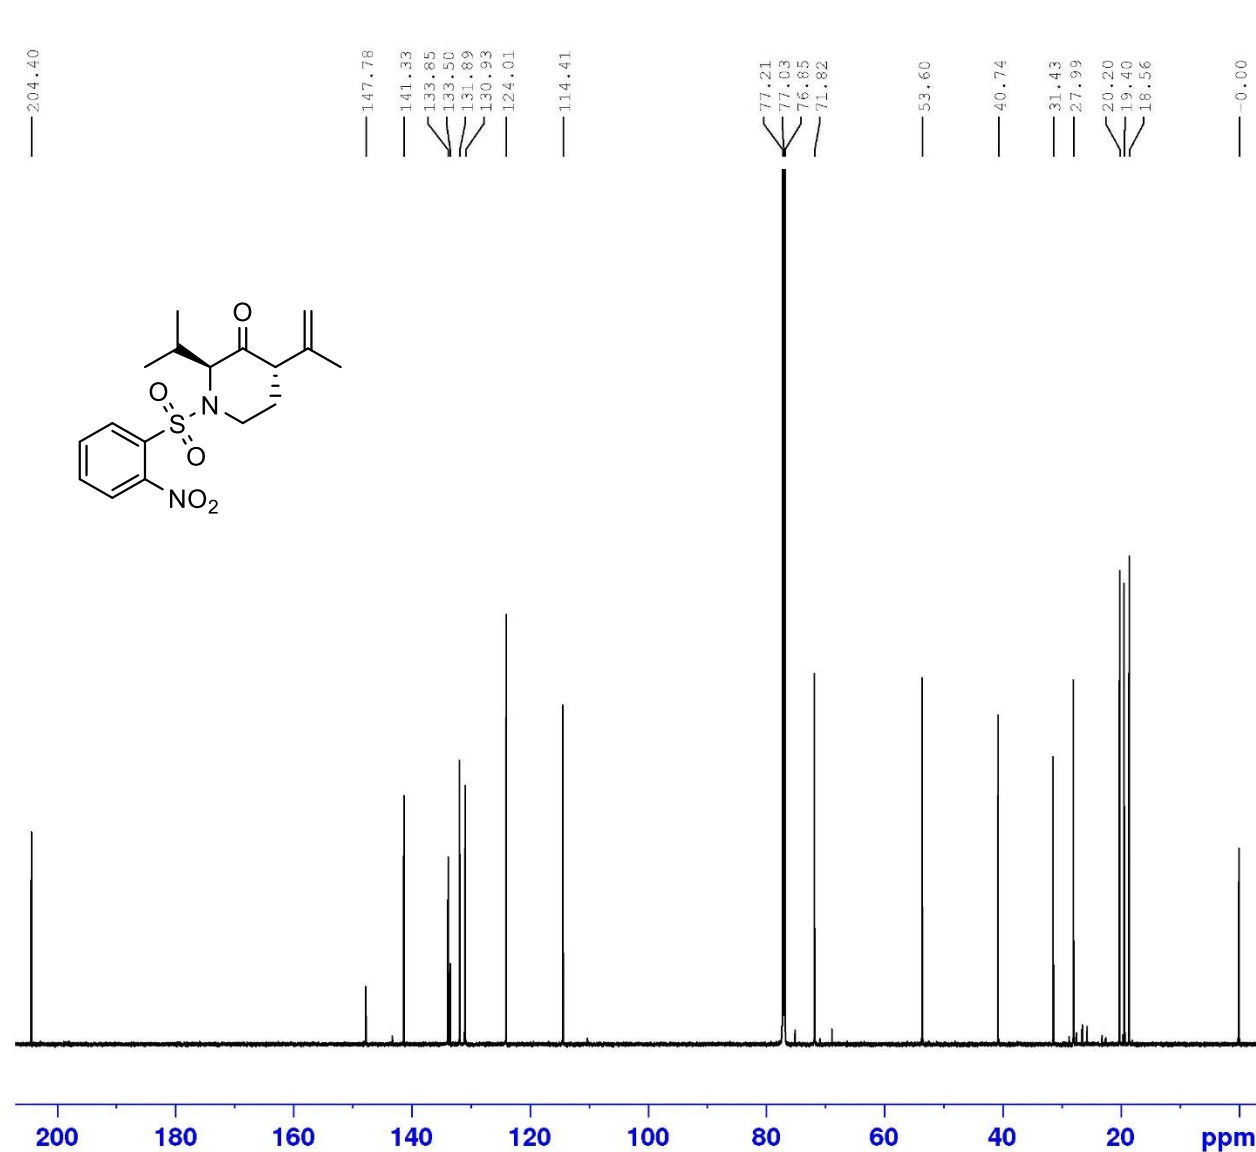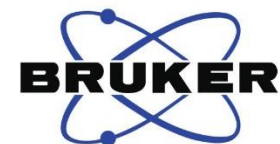

Current Data Parameters  
 NAME Apr23-2020  
 EXPNO 61  
 PROCNO 1

F2 - Acquisition Parameters  
 Date\_ 20200423  
 Time 18.22  
 INSTRUM spect  
 PROBHD 5 mm CPQCI 1H-  
 PULPROG zgpg30  
 TD 65356  
 SOLVENT CDCl3  
 NS 512  
 DS 4  
 SWH 40760.871 Hz  
 FIDRES 0.623675 Hz  
 AQ 0.8017003 sec  
 RG 182.53  
 DW 12.267 usec  
 DE 18.00 usec  
 TE 298.0 K  
 D1 2.00000000 sec  
 D11 0.03000000 sec  
 TD0 1

===== CHANNEL f1 =====  
 SFO1 176.1232717 MHz  
 NUC1 13C  
 P1 12.00 usec  
 PLW1 105.00000000 W

===== CHANNEL f2 =====  
 SFO2 700.3628014 MHz  
 NUC2 1H  
 CPDPRG[2] waltz16  
 PCPD2 65.00 usec  
 PLW2 9.89999962 W  
 PLW12 0.15364001 W  
 PLW13 0.07837200 W

F2 - Processing parameters  
 SI 131072  
 SF 176.1056637 MHz  
 WDW EM  
 SSB 0  
 LB 1.00 Hz  
 GB 0  
 PC 1.40

<sup>13</sup>C-NMR (S)-S2a

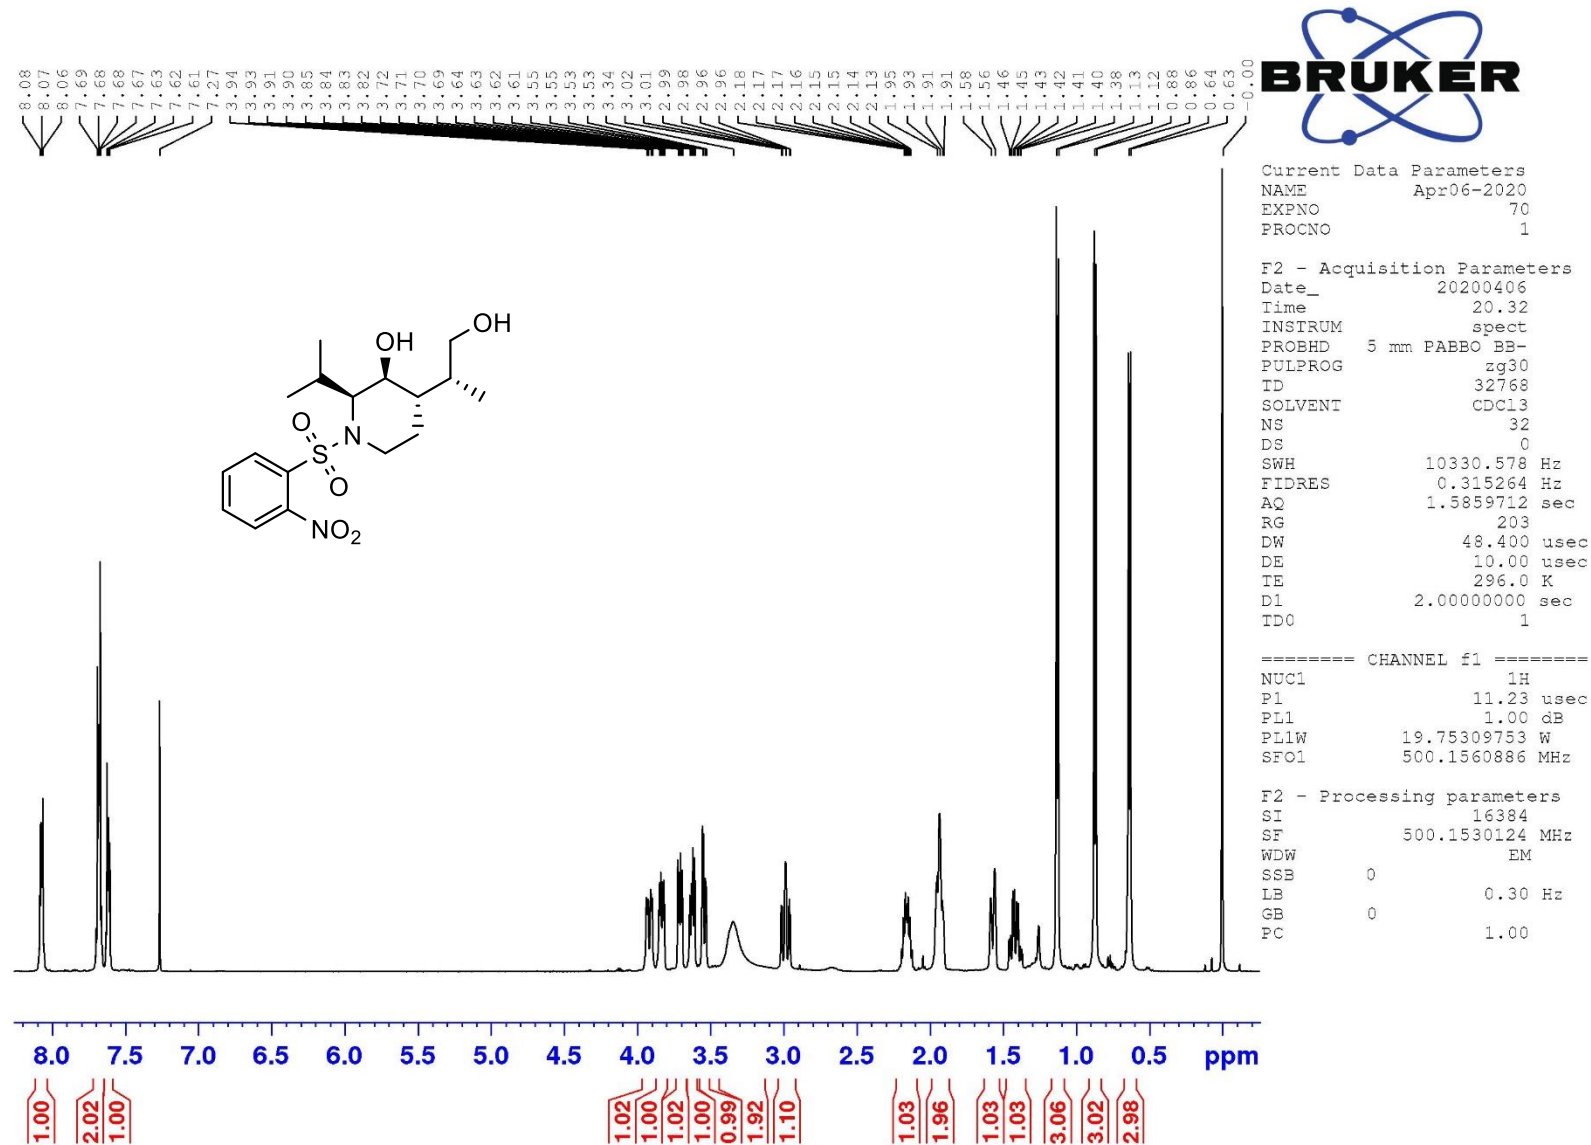

<sup>1</sup>H-NMR (S,S,R)-34a

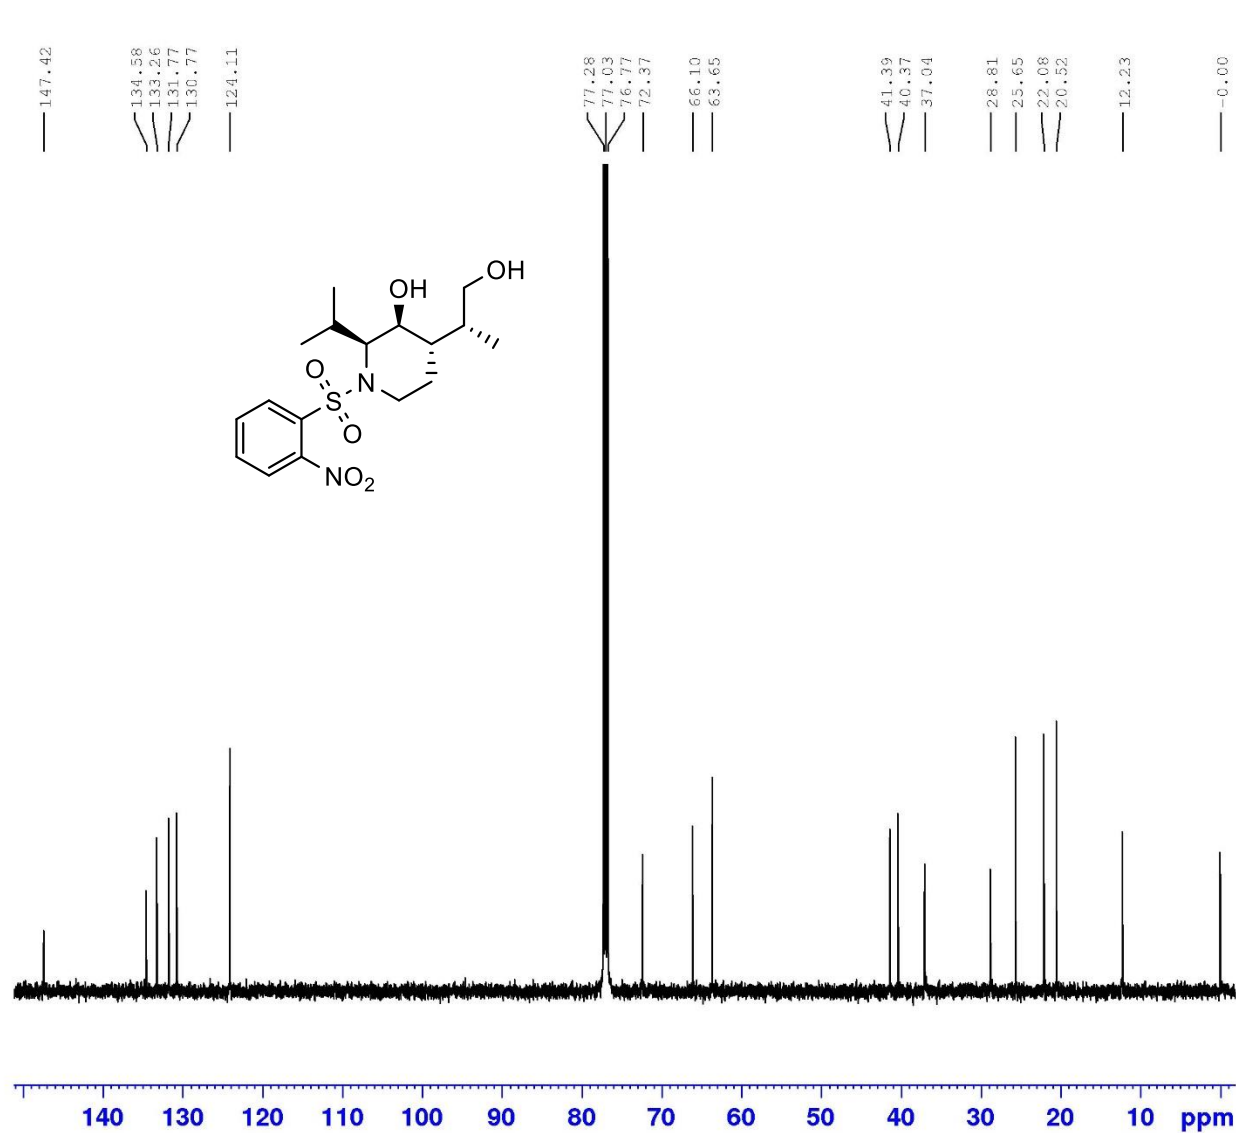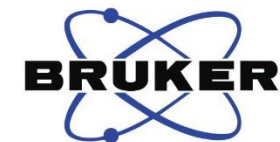

Current Data Parameters  
 NAME Apr06-2020  
 EXPNO 71  
 PROCNO 1

F2 - Acquisition Parameters  
 Date\_ 20200406  
 Time 21.25  
 INSTRUM spect  
 PROBHD 5 mm PABBO BB-  
 PULPROG zgpg30  
 TD 65536  
 SOLVENT CDCl3  
 NS 1024  
 DS 4  
 SWH 32894.738 Hz  
 FIDRES 0.501934 Hz  
 AQ 0.9961472 sec  
 RC 2580  
 DW 15.200 usec  
 DE 10.00 usec  
 TE 296.0 K  
 D1 2.00000000 sec  
 D11 0.03000000 sec  
 TD0 1

===== CHANNEL f1 =====  
 NUC1 13C  
 P1 10.20 usec  
 PL1 1.50 dB  
 PL1W 51.74793243 W  
 SFO1 125.7761482 MHz

===== CHANNEL f2 =====  
 CPDPRG2 waltz16  
 NUC2 1H  
 PCPD2 100.00 usec  
 PL2 1.00 dB  
 PL12 19.99 dB  
 PL13 21.00 dB  
 PL2W 19.75309753 W  
 PL12W 0.24925002 W  
 PL13W 0.19753097 W  
 SFO2 500.1550006 MHz

F2 - Processing parameters  
 SI 32768  
 SF 125.7635745 MHz  
 WDW EM  
 SSB 0  
 LB 1.00 Hz  
 GB 0  
 PC 1.40

<sup>13</sup>C-NMR (S,S,R)-34a

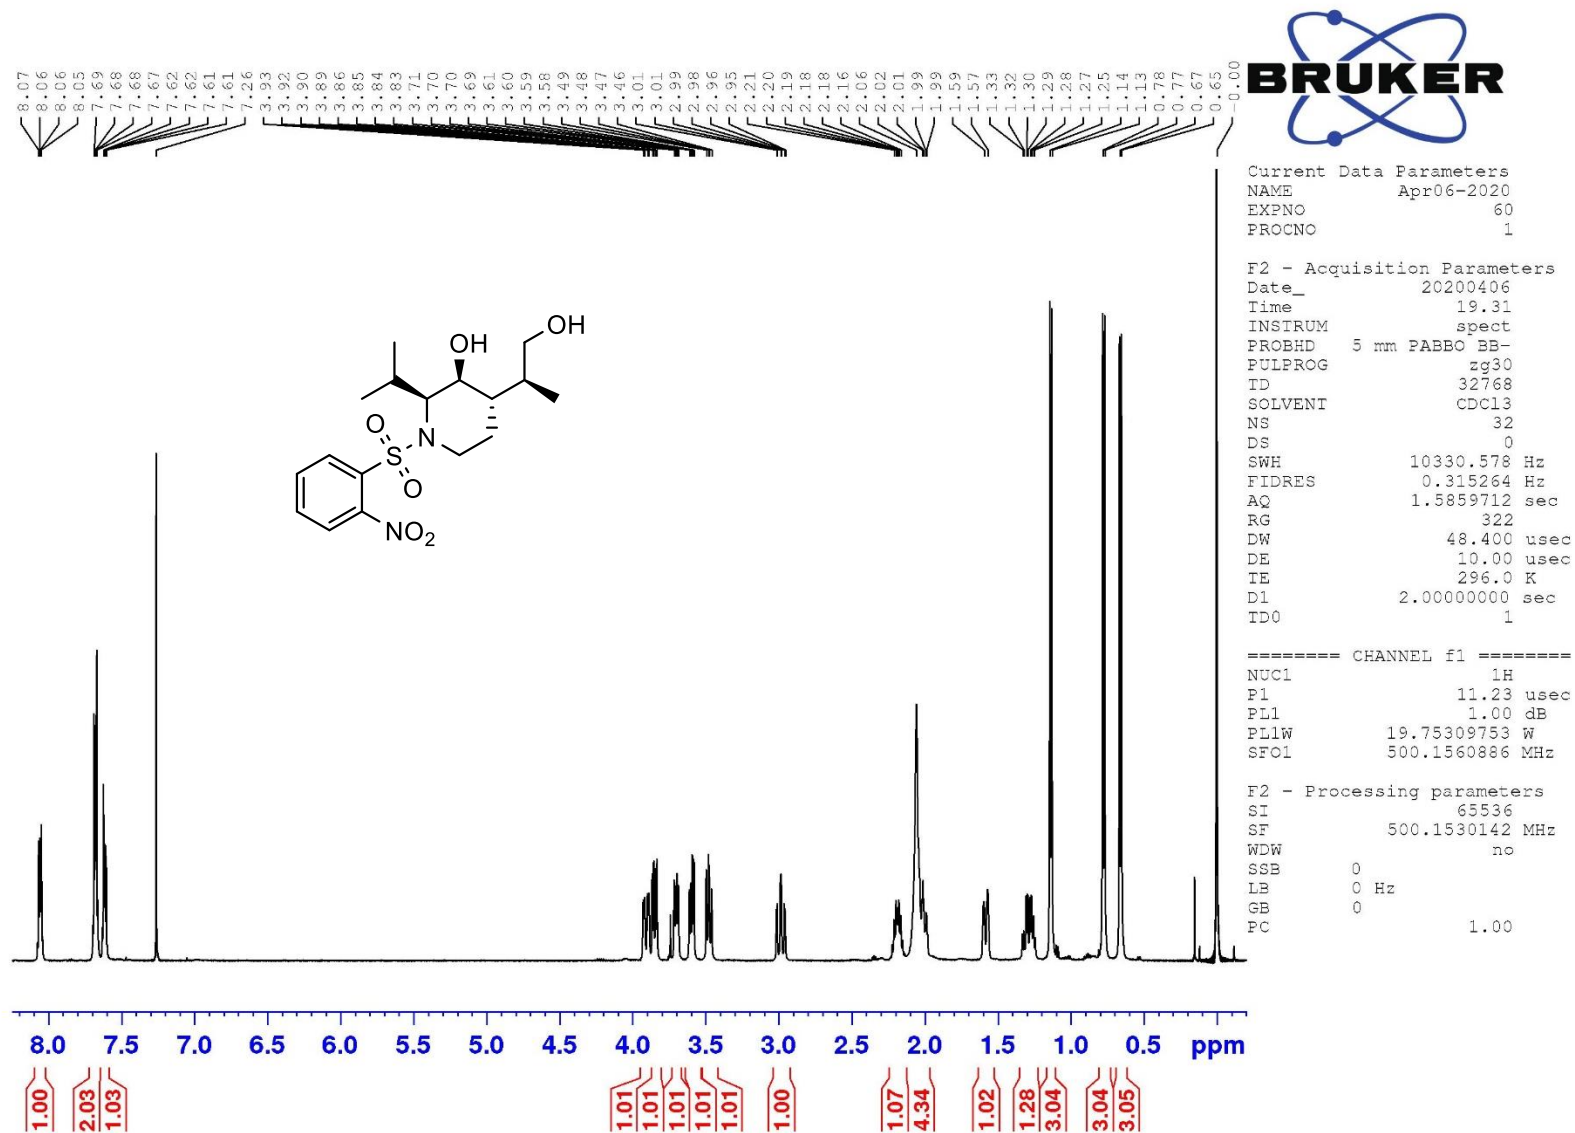

<sup>1</sup>H-NMR (S,S,S)-34a

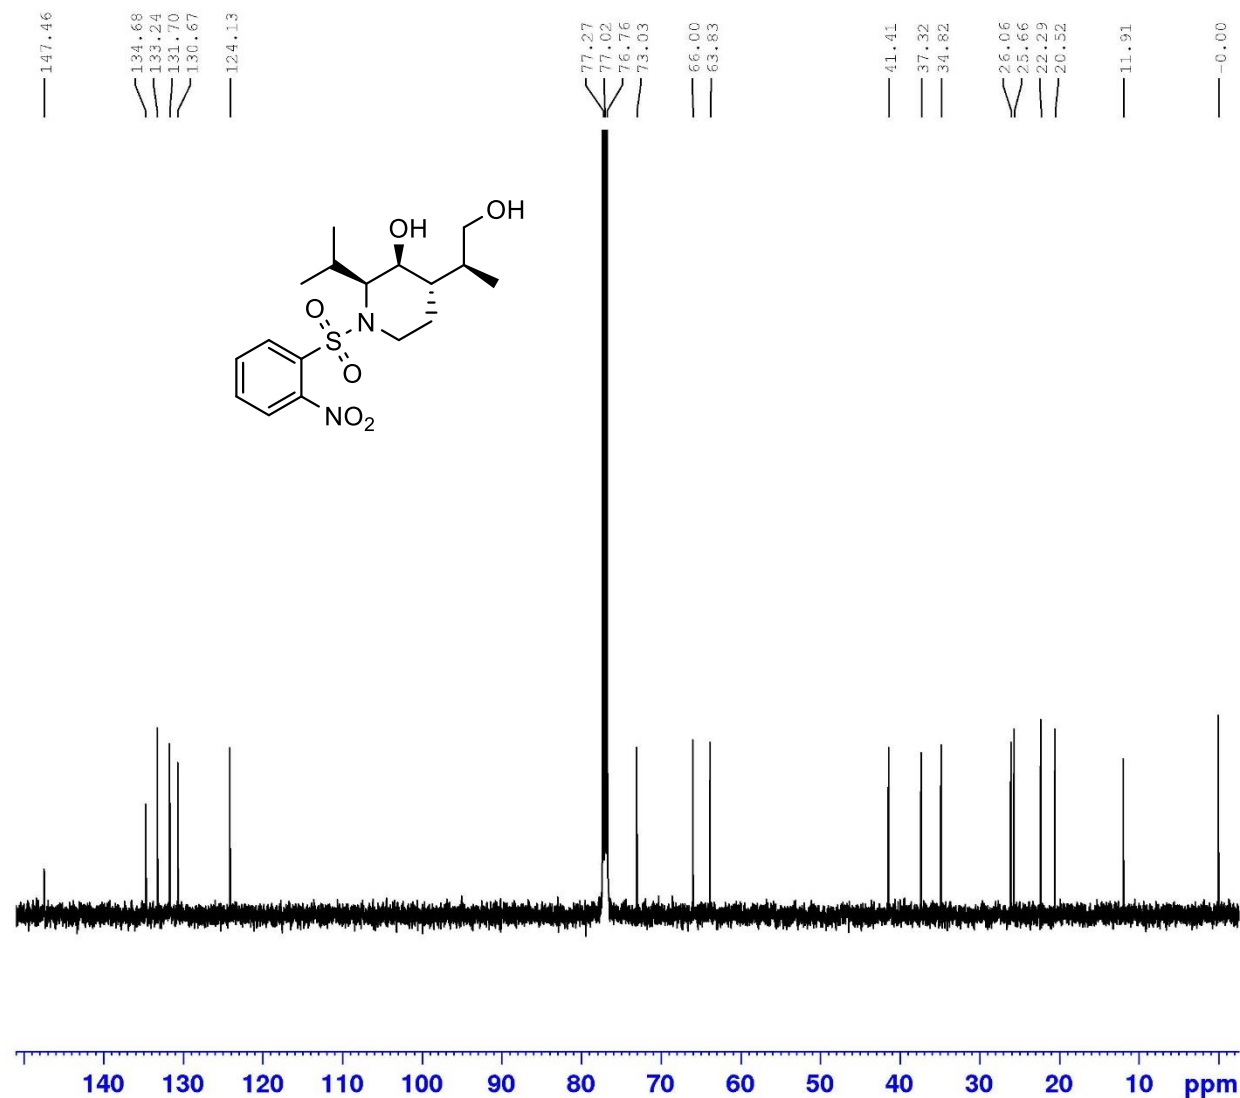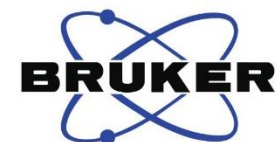

Current Data Parameters  
 NAME Apr06-2020  
 EXPNO 61  
 PROCNO 1

F2 - Acquisition Parameters  
 Date\_ 20200406  
 Time 20.24  
 INSTRUM spect  
 PROBHD 5 mm PABBO BB-  
 PULPROG zgpg30  
 TD 65536  
 SOLVENT CDCl3  
 NS 1024  
 DS 4  
 SWH 32894.738 Hz  
 FIDRES 0.501934 Hz  
 AQ 0.9961472 sec  
 RG 2580  
 DW 15.200 usec  
 DE 10.00 usec  
 TE 296.0 K  
 D1 2.00000000 sec  
 D11 0.03000000 sec  
 TD0 1

===== CHANNEL f1 =====  
 NUC1 13C  
 P1 10.20 usec  
 PL1 1.50 dB  
 PL1W 51.74793243 W  
 SFO1 125.7761482 MHz

===== CHANNEL f2 =====  
 CPDPRG[2] waltz16  
 NUC2 1H  
 PCPD2 100.00 usec  
 PL2 1.00 dB  
 PL12 19.99 dB  
 PL13 21.00 dB  
 PL2W 19.75309753 W  
 PL12W 0.24925002 W  
 PL13W 0.19753097 W  
 SFO2 500.1550006 MHz

F2 - Processing parameters  
 SI 32768  
 SF 125.7635744 MHz  
 WDW EM  
 SSB 0  
 LB 1.00 Hz  
 GB 0  
 PC 1.40

<sup>13</sup>C-NMR (S,S,S)-34a

8.11  
8.11  
7.66  
7.65  
7.64  
7.57  
7.56  
7.55  
7.26

4.14  
4.06  
4.05  
4.05  
4.03  
4.02  
4.02  
3.66  
3.65  
3.64  
3.63  
3.56  
3.54  
3.52  
3.51  
3.49  
3.48  
3.13  
3.12  
3.10  
3.07  
3.07  
2.84  
2.03  
2.02  
2.01  
2.01  
2.00  
1.99  
1.71  
1.70  
1.69  
1.68  
1.66  
1.65  
1.60  
1.60  
1.59  
1.58  
1.42  
1.41  
1.39  
1.39  
0.98

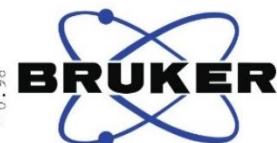

Current Data Parameters  
NAME Feb15-2021  
EXPNO 70  
PROCNO 1

F2 - Acquisition Parameters  
Date\_ 20210215  
Time 22.59  
INSTRUM spect  
PROBHD 5 mm PABBO BB-  
PULPROG zg30  
TD 32768  
SOLVENT CDCl3

NS 32  
DS 0  
SWH 10330.578 Hz  
FIDRES 0.315264 Hz  
AQ 1.5859712 sec  
RG 203  
DW 48.400 usec  
DE 10.00 usec  
TE 296.8 K  
D1 2.00000000 sec  
TDC 1

===== CHANNEL f1 =====  
NUC1 1H  
P1 11.23 usec  
PL1 1.00 dB  
PL1W 19.75309753 W  
SFO1 500.1560886 MHz

F2 - Processing parameters  
SI 16384  
SF 500.1530170 MHz  
WDW EM  
SSB 0  
LB 0.30 Hz  
GB 0  
PC 1.00

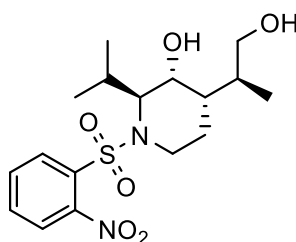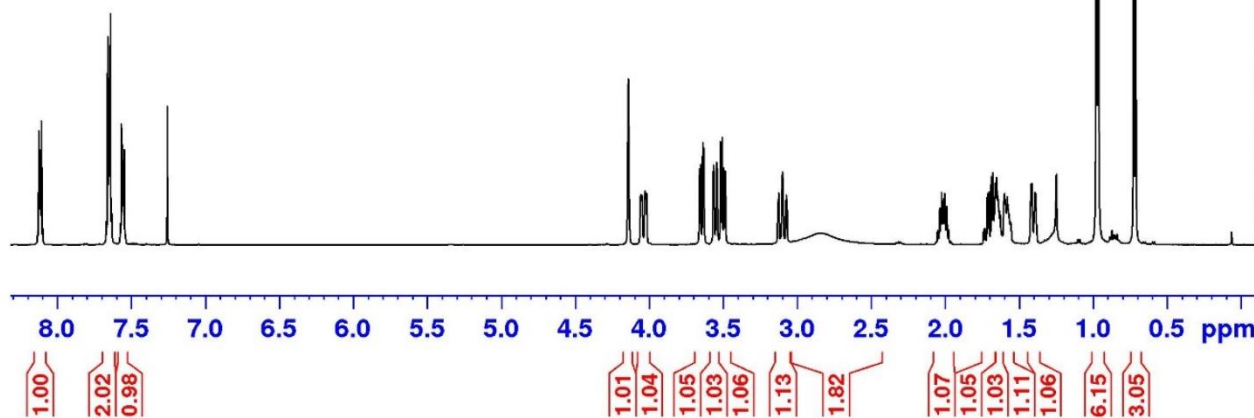

$^1\text{H-NMR}$  (*R,S,S*)-**34a**

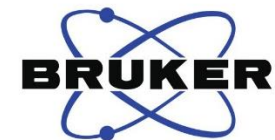

Current Data Parameters  
 NAME Feb15-2021  
 EXPNO 71  
 PROCNO 1

F2 - Acquisition Parameters  
 Date\_ 20210215  
 Time 23.52  
 INSTRUM spect  
 PROBHD 5 mm PABBO BB-  
 PULPROG zgpg30  
 TD 65536  
 SOLVENT CDCl3  
 NS 1024  
 DS 4  
 SWH 32894.738 Hz  
 FIDRES 0.501934 Hz  
 AQ 0.9961472 sec  
 RG 2580  
 DW 15.200 usec  
 DE 10.00 usec  
 TE 296.8 K  
 D1 2.0000000 sec  
 D11 0.03000000 sec  
 TDC 1

===== CHANNEL f1 =====  
 NUC1 13C  
 P1 10.20 usec  
 PL1 1.50 dB  
 PL1W 51.74793243 W  
 SFO1 125.7761482 MHz

===== CHANNEL f2 =====  
 CPDPRG[2] waltz16  
 NUC2 1H  
 PCPD2 100.00 usec  
 PL2 1.00 dB  
 PL12 19.99 dB  
 PL13 21.00 dB  
 PL2W 19.75309753 W  
 PL12W 0.24925002 W  
 PL13W 0.19753097 W  
 SFO2 500.1550006 MHz

F2 - Processing parameters  
 SI 32768  
 SF 125.7635720 MHz  
 WDW EM  
 SSB 0  
 LB 1.00 Hz  
 GB 0  
 PC 1.40

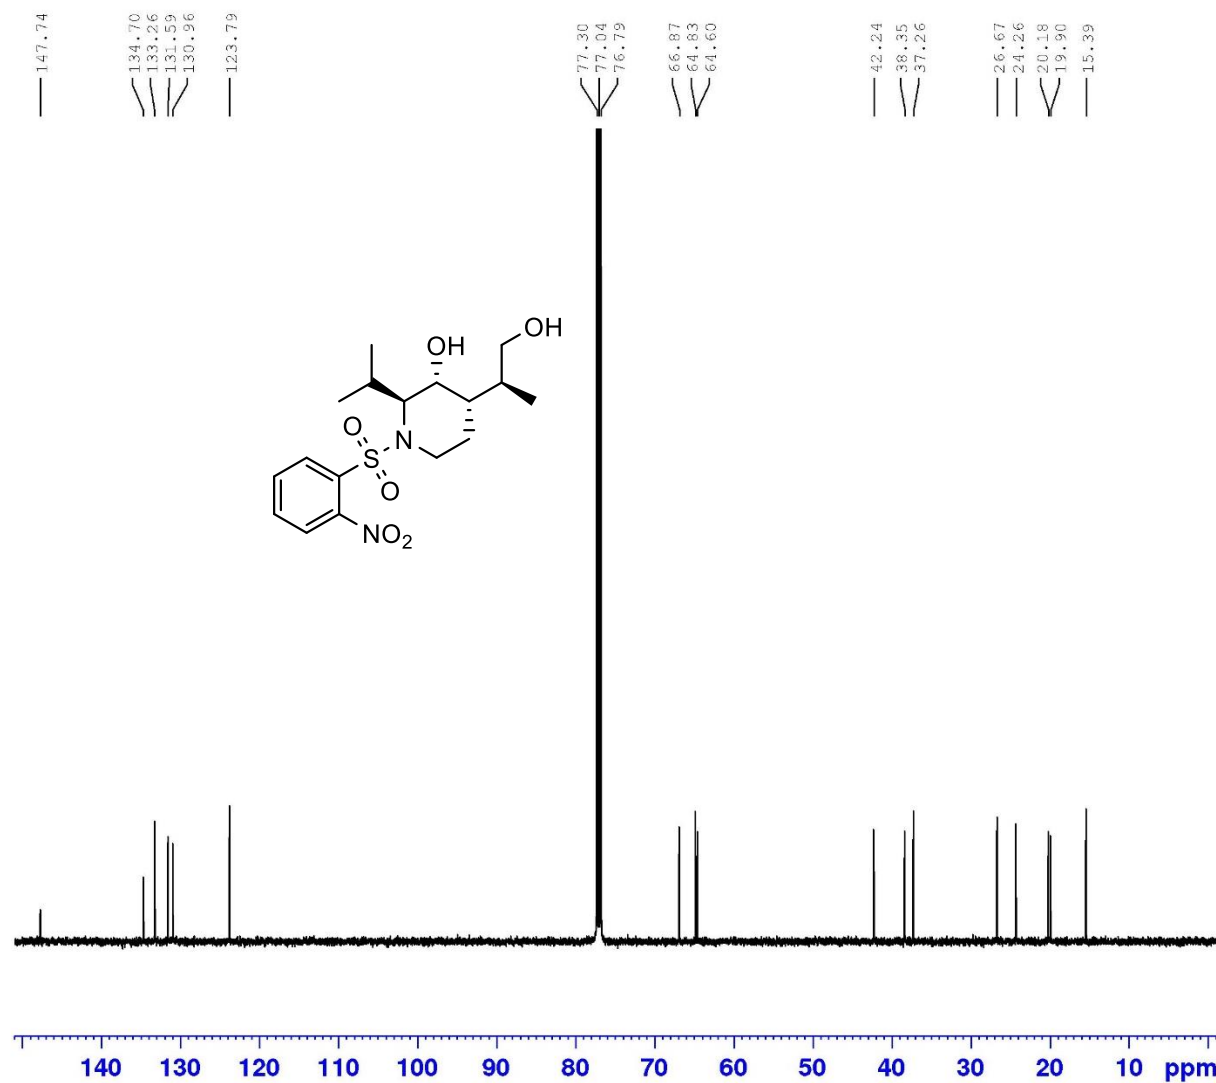

<sup>13</sup>C-NMR (R,S,S)-34a

8.09  
8.03  
7.67  
7.66  
7.65  
7.65  
7.57  
7.56  
7.56  
7.55  
7.26

4.09  
4.07  
4.01  
3.54  
3.52  
3.51  
3.49  
3.48  
3.47  
3.47  
3.46  
3.44  
3.43  
3.12  
3.11  
3.09  
3.09  
3.06  
2.94  
2.05  
2.03  
2.02  
2.02  
2.01  
2.00  
1.75  
1.74  
1.65  
1.64  
1.64  
1.62  
1.61  
1.60  
1.59  
1.48  
1.46  
0.97  
0.96  
0.96

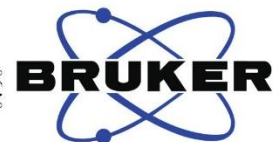

Current Data Parameters  
NAME Feb15-2021  
EXPNO 80  
PROCNO 1

F2 - Acquisition Parameters  
Date\_ 20210216  
Time 6.17  
INSTRUM spect  
PROBHD 5 mm PABBO BB-  
PULPROG zg30  
TD 32768  
SOLVENT CDCl3  
NS 32  
DS 0  
SWH 10330.578 Hz  
FIDRES 0.315264 Hz  
AQ 1.5859712 sec  
RG 362  
DW 48.400 usec  
DE 10.00 usec  
TE 296.8 K  
D1 2.00000000 sec  
TD0 1

===== CHANNEL f1 =====  
NUC1 1H  
P1 11.23 usec  
PL1 1.00 dB  
PL1W 19.75309753 W  
SFO1 500.1560886 MHz

F2 - Processing parameters  
SI 16384  
SF 500.1530173 MHz  
WDW EM  
SSB 0  
LB 0.30 Hz  
GB 0  
PC 1.00

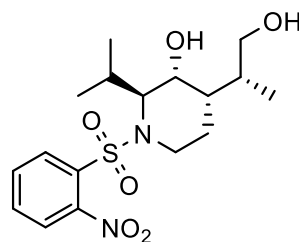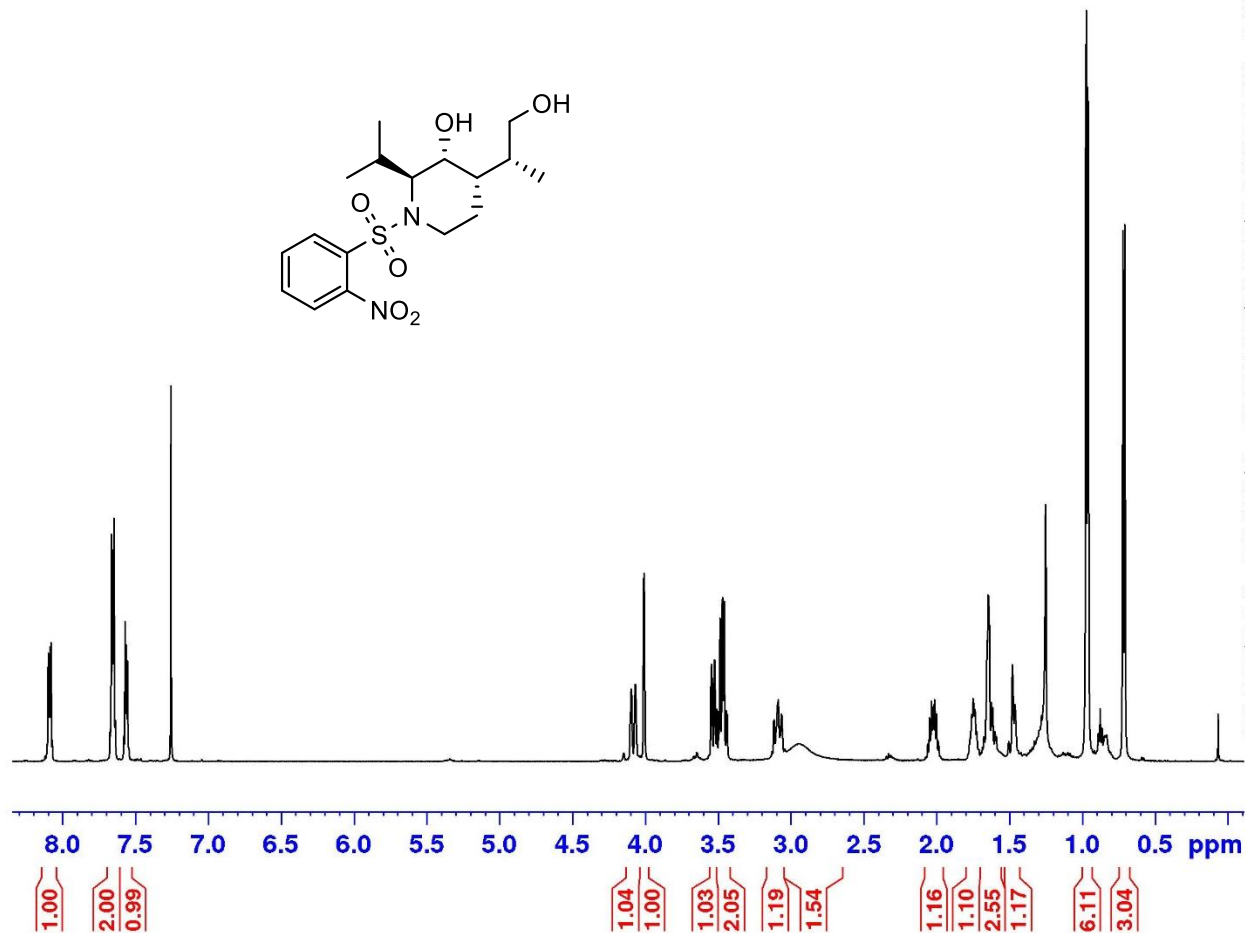

<sup>1</sup>H-NMR (*R,S,R*)-34a

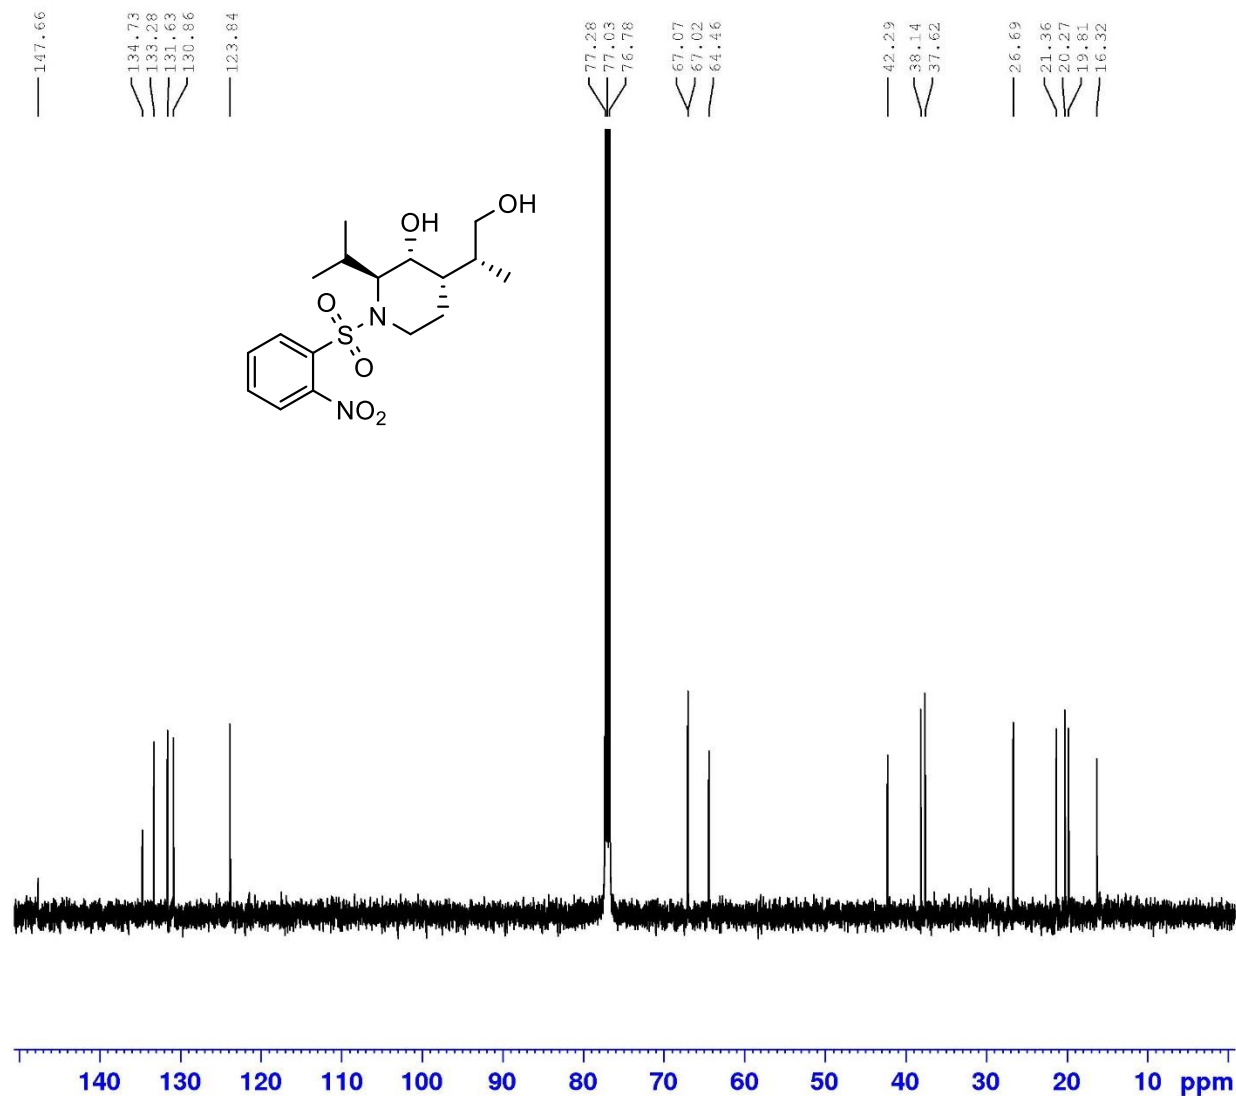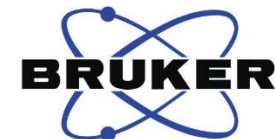

Current Data Parameters  
 NAME Feb15-2021  
 EXPNO 81  
 PROCNO 1

F2 - Acquisition Parameters  
 Date\_ 20210216  
 Time 7.10  
 INSTRUM spect  
 PROBHD 5 mm PABBO BB-  
 PULPROG zgpg30  
 TD 65536  
 SOLVENT CDCl3  
 NS 1024  
 DS 4  
 SWH 32894.738 Hz  
 FIDRES 0.501934 Hz  
 AQ 0.9961472 sec  
 RG 2580  
 DW 15.200 usec  
 DE 10.00 usec  
 TE 296.8 K  
 D1 2.00000000 sec  
 D11 0.03000000 sec  
 TDC 1

===== CHANNEL f1 =====  
 NUC1 13C  
 P1 10.20 usec  
 PL1 1.50 dB  
 PL1W 51.74793243 W  
 SFO1 125.7761482 MHz

===== CHANNEL f2 =====  
 CPDPRG[2] waltz16  
 NUC2 1H  
 PCPD2 100.00 usec  
 PL2 1.00 dB  
 PL12 19.99 dB  
 PL13 21.00 dB  
 PL2W 19.75309753 W  
 PL12W 0.24925002 W  
 PL13W 0.19753097 W  
 SFO2 500.1550006 MHz

F2 - Processing parameters  
 SI 32768  
 SF 125.7635720 MHz  
 WDW EM  
 SSB 0  
 LB 1.00 Hz  
 GB 0  
 PC 1.40

<sup>13</sup>C-NMR (R,S,R)-34a

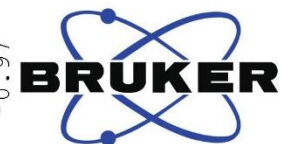

Current Data Parameters  
 NAME Jul16-2020  
 EXPNO 200  
 PROCNO 1

F2 - Acquisition Parameters  
 Date\_ 20200717  
 Time 4.43  
 INSTRUM spect  
 PROBHD 5 mm CPQCI 1H-  
 PULPROG zg  
 TD 65536  
 SOLVENT CDCl3  
 NS 16  
 DS 2  
 SWH 10504.202 Hz  
 FIDRES 0.160281 Hz  
 AQ 3.1195135 sec  
 RG 14.51  
 DW 47.600 usec  
 DE 20.00 usec  
 TE 298.0 K  
 D1 2.00000000 sec  
 TD0 1

===== CHANNEL f1 =====  
 SFO1 700.3632917 MHz  
 NUC1 1H  
 P1 8.15 usec  
 PLW1 9.89999962 W

F2 - Processing parameters  
 SI 65536  
 SF 700.3600165 MHz  
 WDW no  
 SSB 0  
 LB 0 Hz  
 GB 0  
 PC 1.00

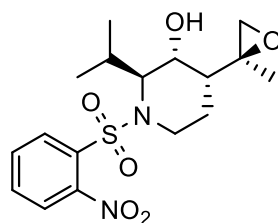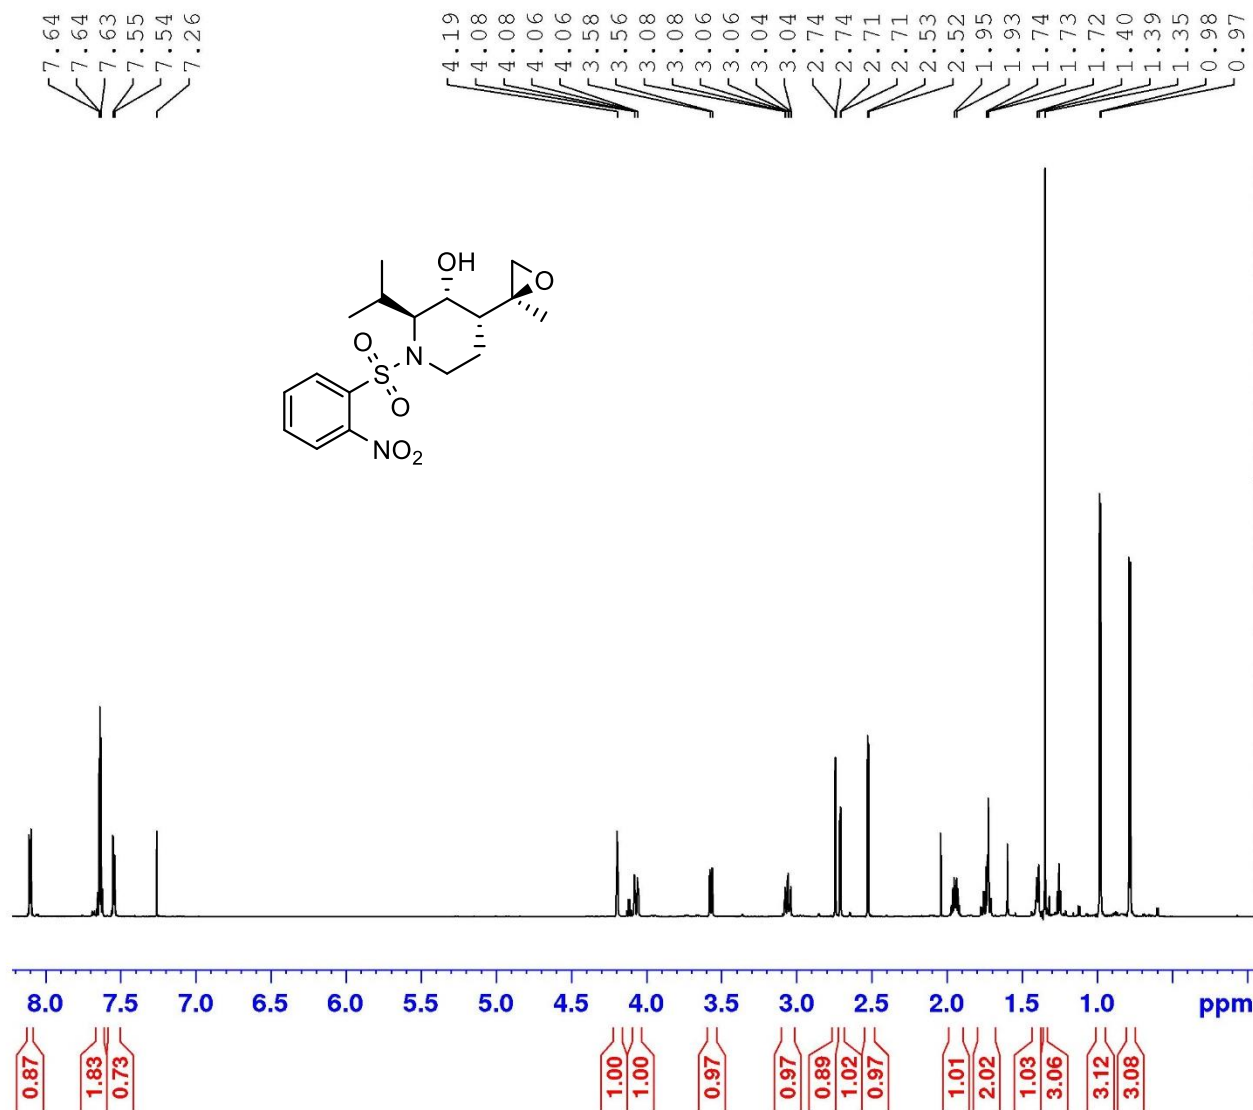

<sup>1</sup>H-NMR (*R,R,S*)-35a

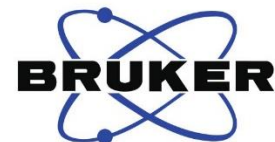

Current Data Parameters  
 NAME Jul16-2020  
 EXPNO 201  
 PROCNO 1

F2 - Acquisition Parameters  
 Date\_ 20200717  
 Time 5.10  
 INSTRUM spect  
 PROBHD 5 mm CPQCI 1H-  
 PULPROG zgpg30  
 TD 65356  
 SOLVENT CDCl3  
 NS 512  
 DS 4  
 SWH 40760.871 Hz  
 FIDRES 0.623675 Hz  
 AQ 0.8017003 sec  
 RG 182.53  
 DW 12.267 usec  
 DE 18.00 usec  
 TE 298.0 K  
 D1 2.00000000 sec  
 D11 0.03000000 sec  
 TD0 1

===== CHANNEL f1 =====  
 SFO1 176.1232717 MHz  
 NUC1 13C  
 P1 12.00 usec  
 PLW1 105.0000000 W

===== CHANNEL f2 =====  
 SFO2 700.3628014 MHz  
 NUC2 1H  
 CPDPRG[2] waltz16  
 PCPD2 65.00 usec  
 PLW2 9.89999962 W  
 PLW12 0.15564001 W  
 PLW13 0.07837200 W

F2 - Processing parameters  
 SI 131072  
 SF 176.1056620 MHz  
 WDW EM  
 SSB 0  
 LB 1.00 Hz  
 GB 0  
 PC 1.40

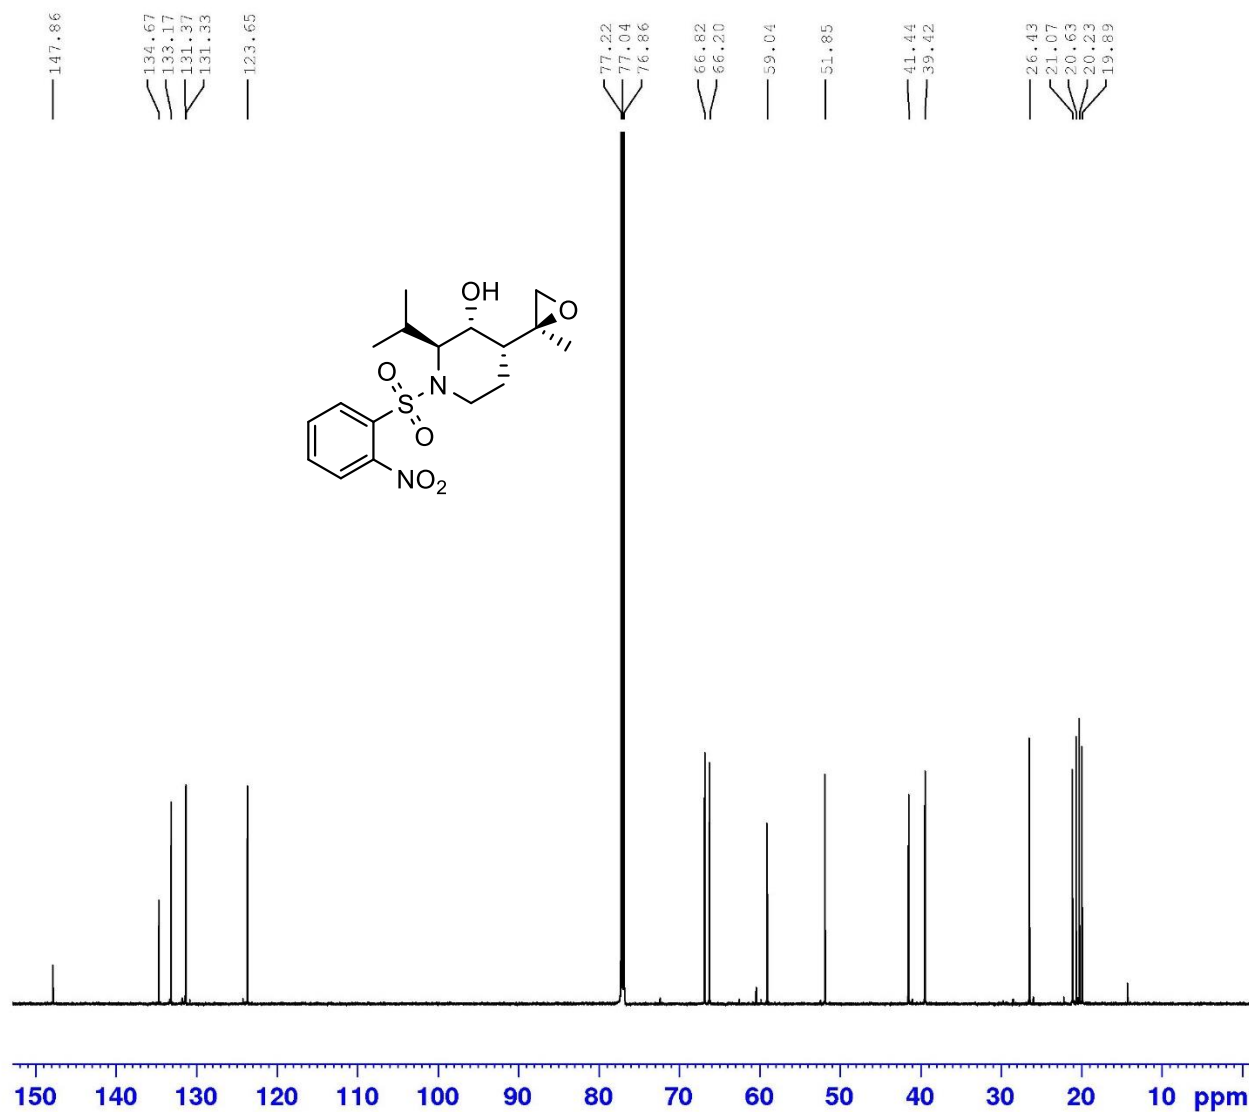

<sup>13</sup>C-NMR (R,R,S)-35a

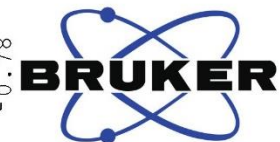

Current Data Parameters  
 NAME Jul16-2020  
 EXPNO 210  
 PROCNO 1

F2 - Acquisition Parameters  
 Date\_ 20200717  
 Time 8.28  
 INSTRUM spect  
 PROBHD 5 mm CPQCI 1H-  
 PULPROG zg  
 TD 65536  
 SOLVENT CDCl3  
 NS 16  
 DS 2  
 SWH 10504.202 Hz  
 FIDRES 0.160281 Hz  
 AQ 3.1195135 sec  
 RG 14.51  
 DW 47.600 usec  
 DE 20.00 usec  
 TE 298.0 K  
 D1 2.00000000 sec  
 TD0 1

===== CHANNEL f1 =====  
 SFO1 700.3632917 MHz  
 NUC1 1H  
 P1 8.15 usec  
 PLW1 9.89999962 W

F2 - Processing parameters  
 SI 65536  
 SF 700.3600180 MHz  
 WDW EM  
 SSB 0  
 LB 0.30 Hz  
 GB 0  
 PC 1.00

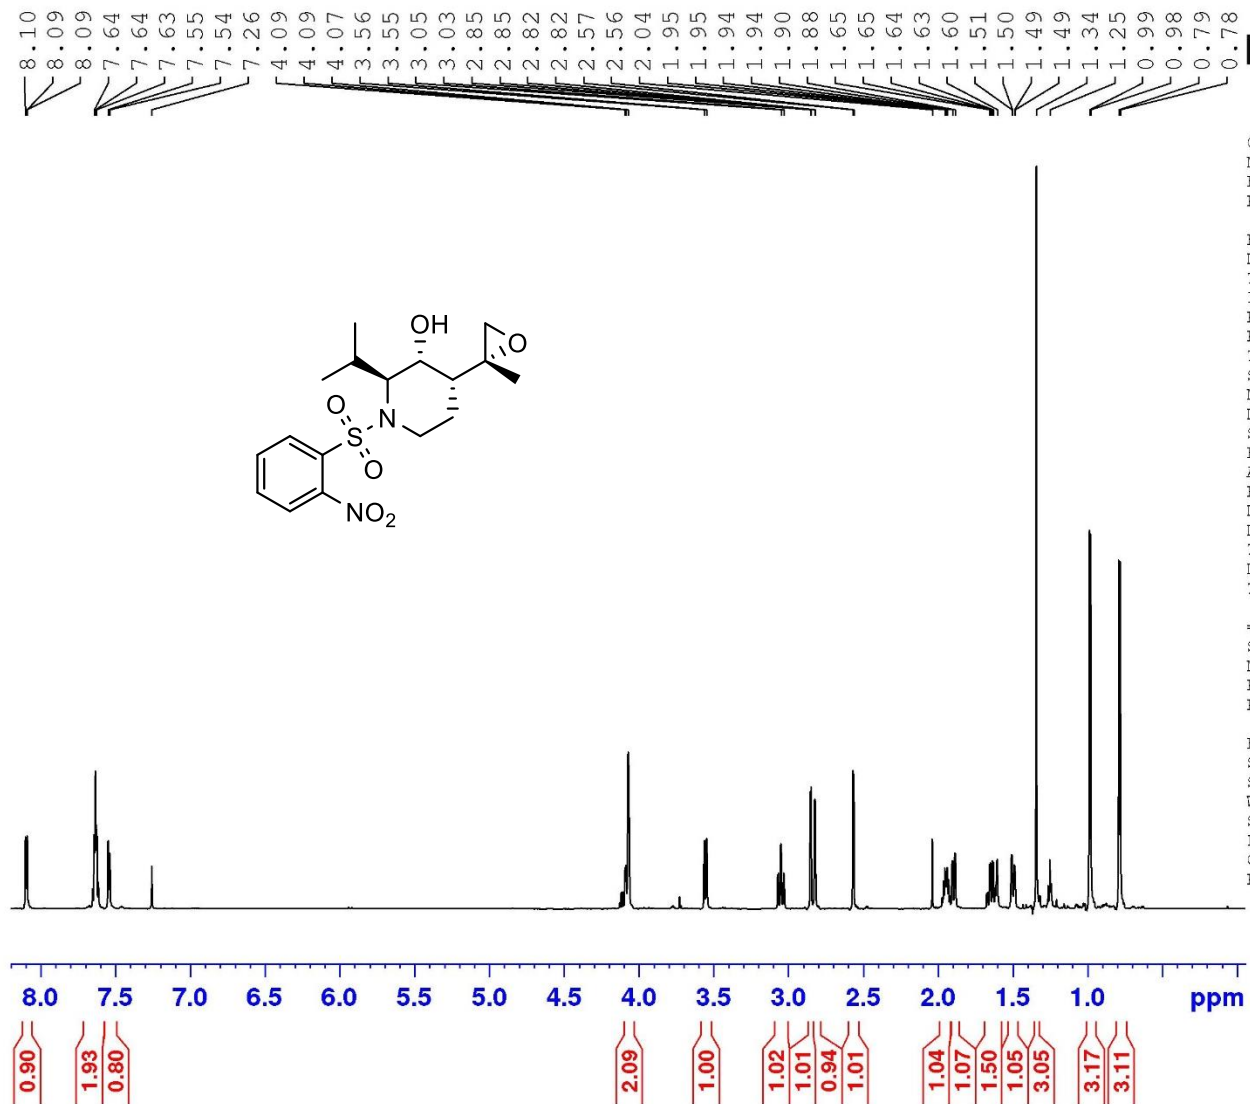

<sup>1</sup>H-NMR (R,R,R)-35a

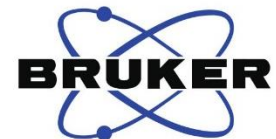

Current Data Parameters  
 NAME Jul16-2020  
 EXPNO 211  
 PROCNO 1

F2 - Acquisition Parameters  
 Date\_ 20200717  
 Time 8.55  
 INSTRUM spect  
 PROBHD 5 mm CPQCI 1H-  
 PULPROG zgpg30  
 TD 65356  
 SOLVENT CDCl3  
 NS 512  
 DS 4  
 SWH 40760.871 Hz  
 FIDRES 0.623675 Hz  
 AQ 0.8017003 sec  
 RG 182.53  
 DW 12.267 usec  
 DE 18.00 usec  
 TE 298.0 K  
 D1 2.00000000 sec  
 D11 0.03000000 sec  
 TD0 1

===== CHANNEL f1 =====  
 SFO1 176.1232717 MHz  
 NUC1 13C  
 P1 12.00 usec  
 PLW1 105.00000000 W

===== CHANNEL f2 =====  
 SFO2 700.3628014 MHz  
 NUC2 1H  
 CPDPRG[2] waltz16  
 PCPD2 65.00 usec  
 PLW2 9.89999962 W  
 PLW12 0.15564001 W  
 PLW13 0.07837200 W

F2 - Processing parameters  
 SI 131072  
 SF 176.1056620 MHz  
 WDW EM  
 SSB 0  
 LB 1.00 Hz  
 GB 0  
 PC 1.40

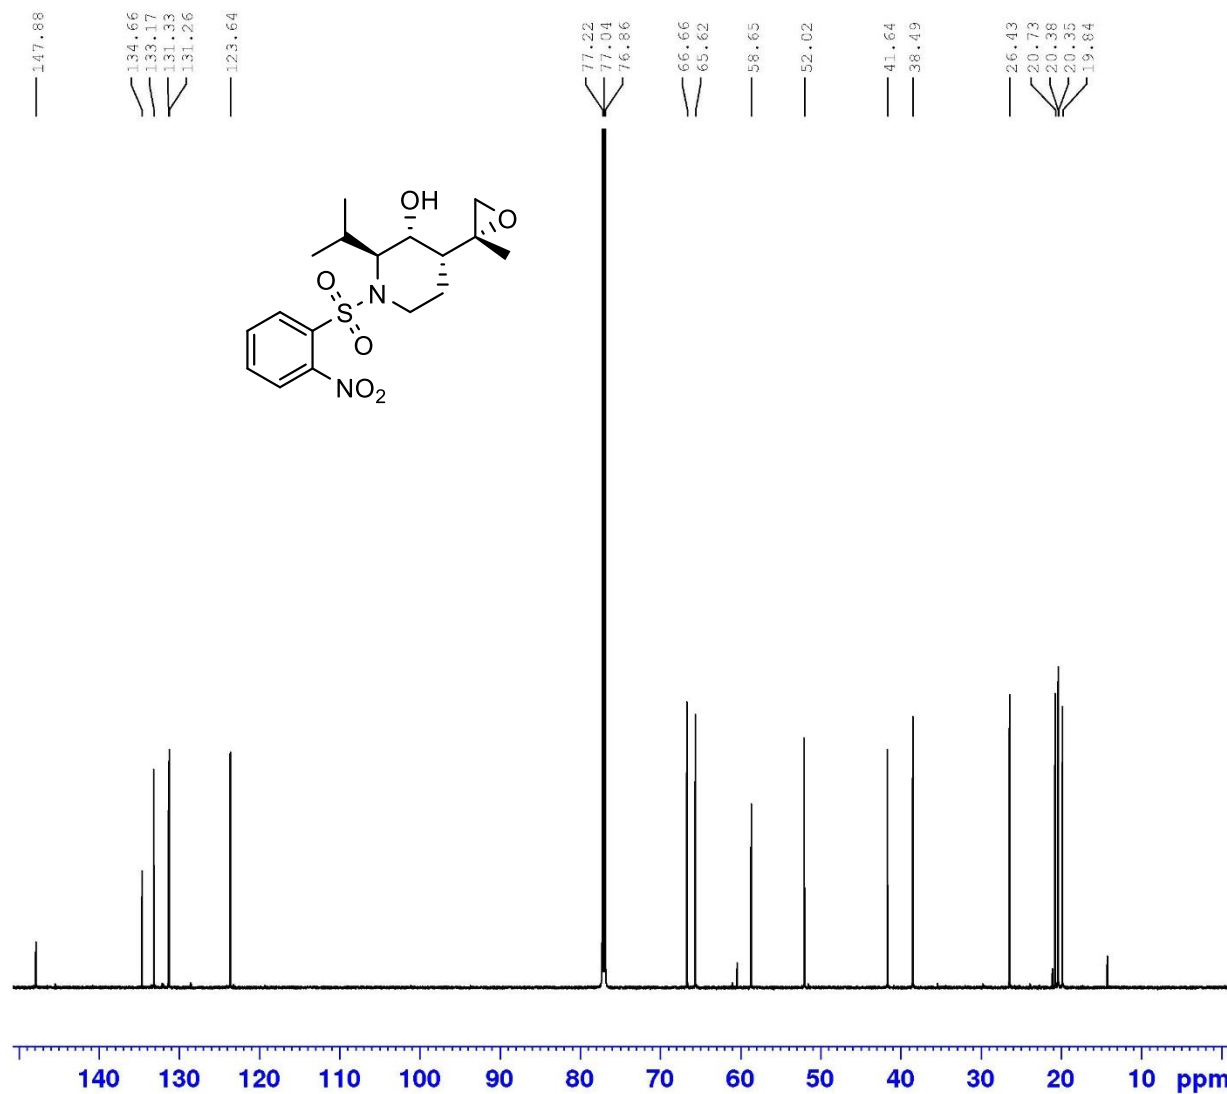

<sup>13</sup>C-NMR (R,R,R)-35a

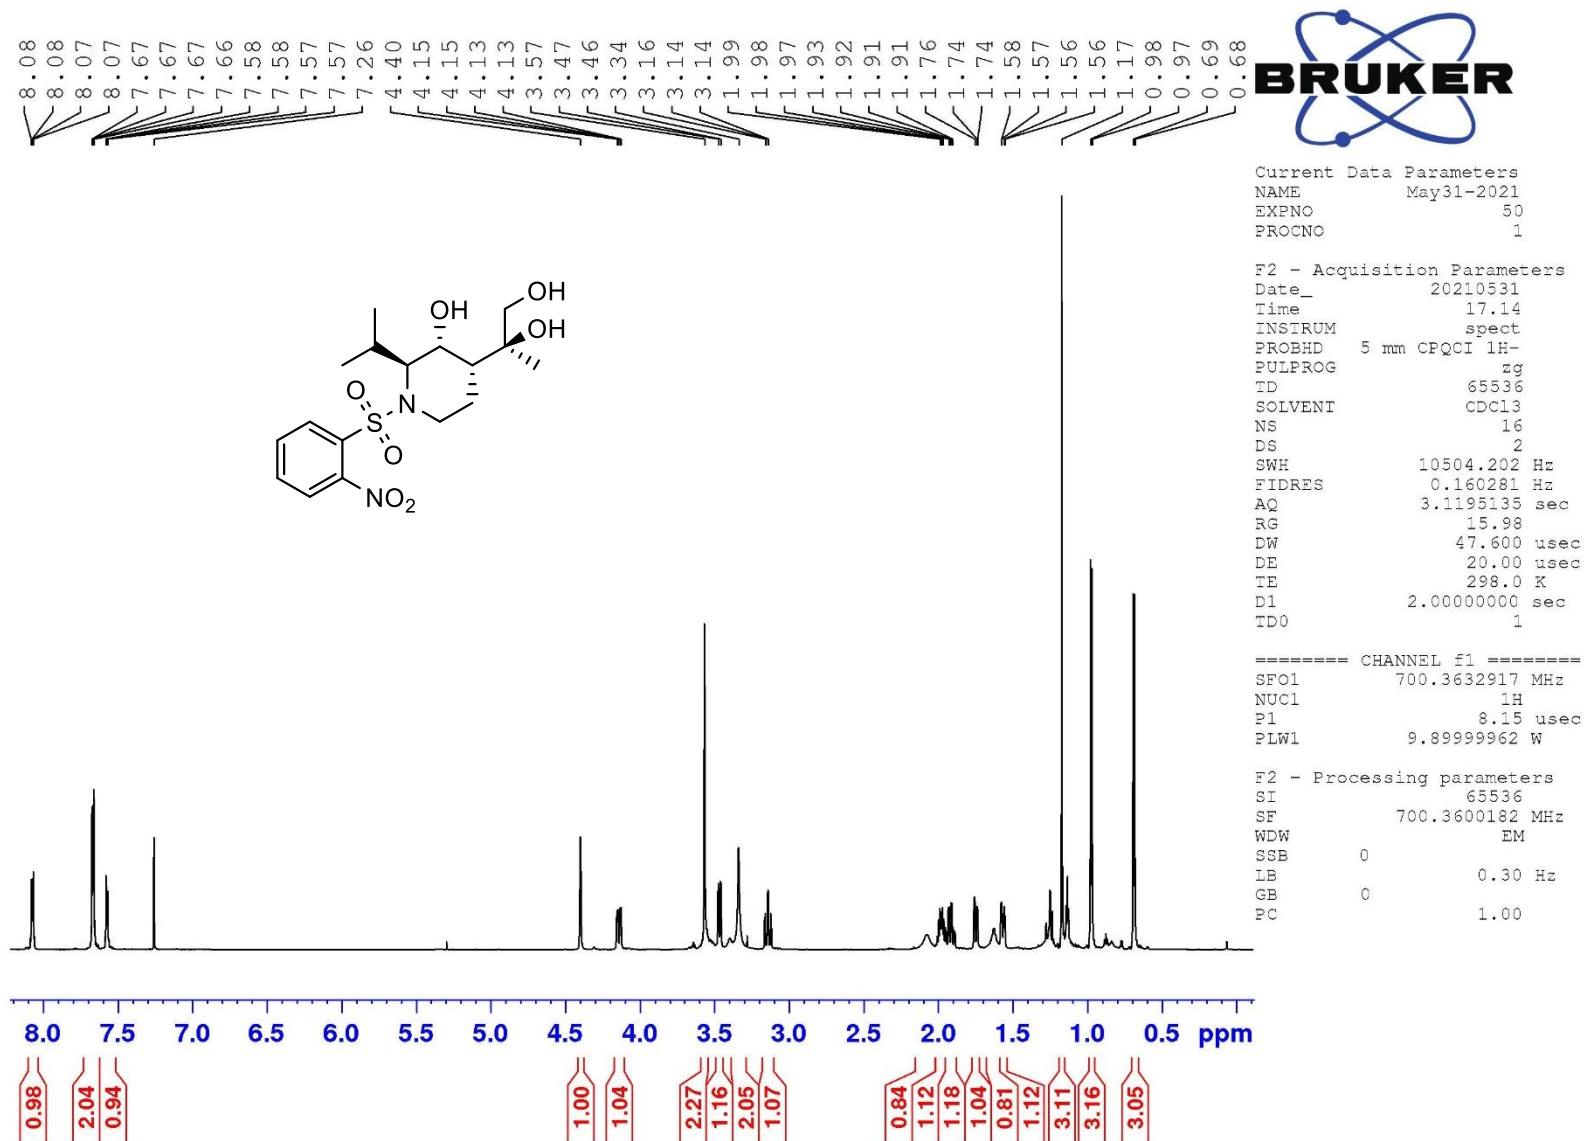

<sup>1</sup>H-NMR (*R,R,S*)-36a

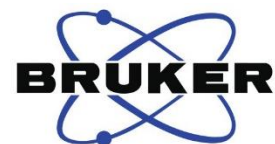

Current Data Parameters  
 NAME May31-2021  
 EXPNO 51  
 PROCNO 1

F2 - Acquisition Parameters  
 Date\_ 20210531  
 Time 18.04  
 INSTRUM spect  
 PROBHD 5 mm CPQCI 1H-  
 PULPROG zgpg30  
 ID 65356  
 SOLVENT CDCl3  
 NS 1024  
 DS 4  
 SWH 40760.871 Hz  
 FIDRES 0.623675 Hz  
 AQ 0.8017003 sec  
 RG 182.53  
 DW 12.267 usec  
 DE 18.00 usec  
 TE 298.0 K  
 D1 2.00000000 sec  
 D11 0.03000000 sec  
 TD0 1

===== CHANNEL f1 =====  
 SFO1 176.1232717 MHz  
 NUC1 13C  
 P1 12.00 usec  
 PLW1 105.0000000 W

===== CHANNEL f2 =====  
 SFO2 700.3628014 MHz  
 NUC2 1H  
 CPDPRG[2] waltz16  
 PCPD2 65.00 usec  
 PLW2 9.89999962 W  
 PLW12 0.15564001 W  
 PLW13 0.07837200 W

F2 - Processing parameters  
 SI 131072  
 SF 176.1056620 MHz  
 WDW EM  
 SSB 0  
 LB 1.00 Hz  
 GB 0  
 PC 1.40

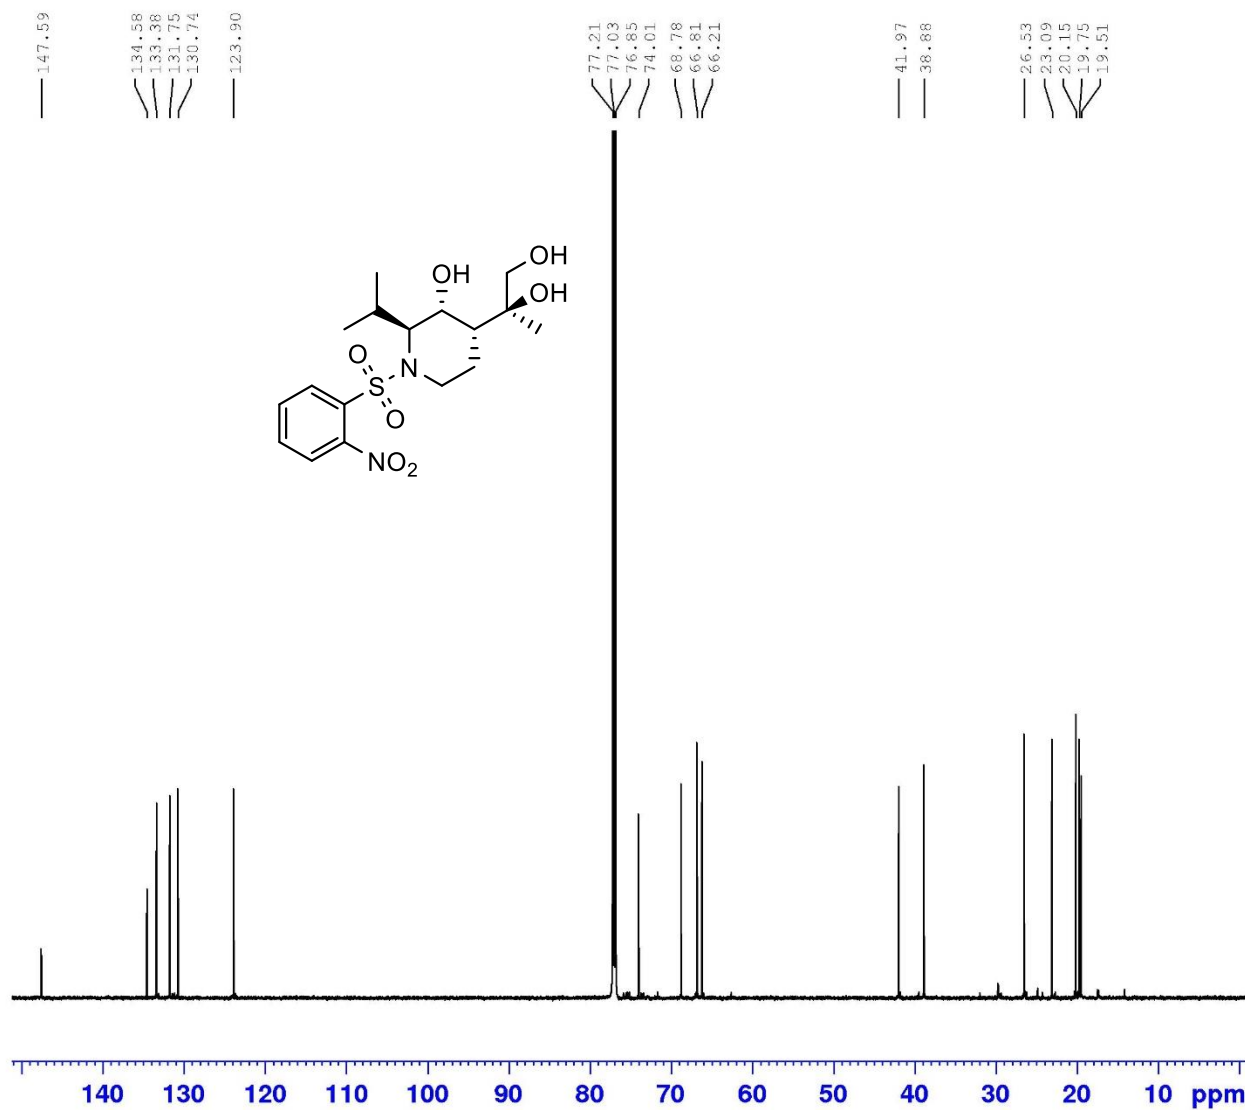

<sup>13</sup>C-NMR (R,R,S)-36a

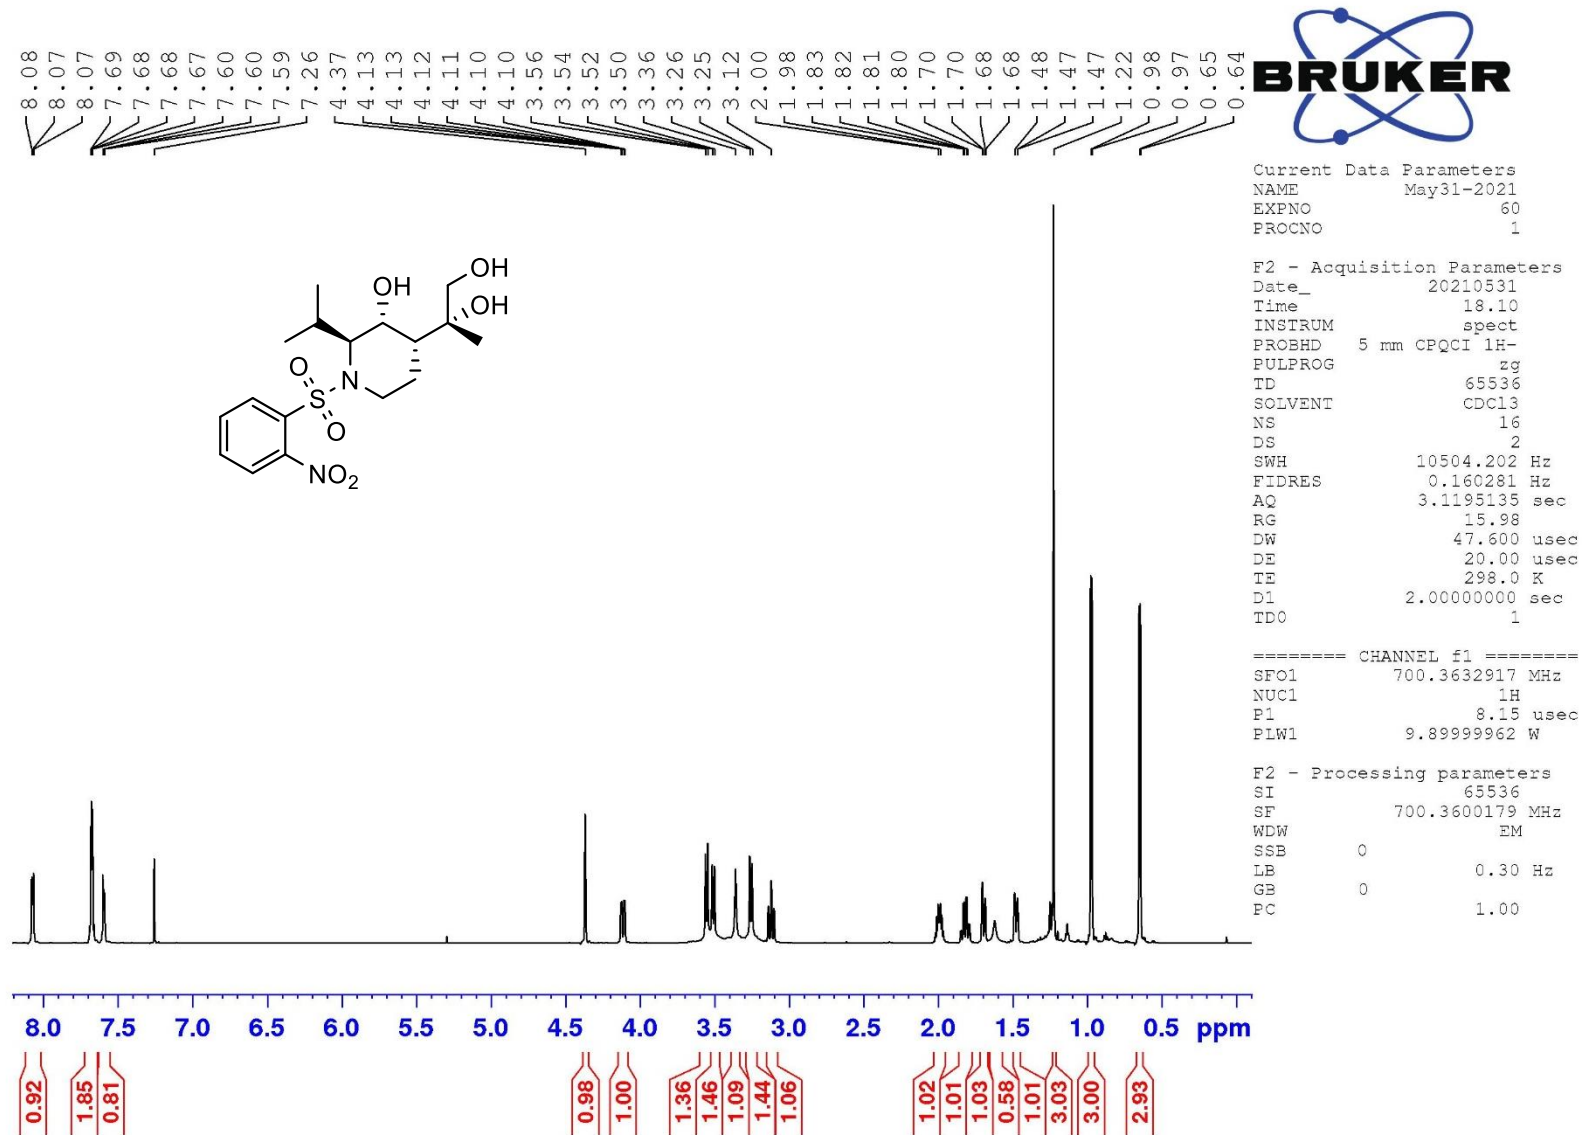

<sup>1</sup>H-NMR (R,R,R)-36a

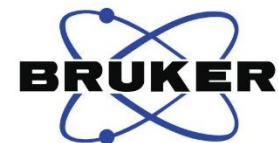

Current Data Parameters  
 NAME May31-2021  
 EXPNO 61  
 PROCNO 1

F2 - Acquisition Parameters  
 Date\_ 20210531  
 Time 19.00  
 INSTRUM spect  
 PROBHD 5 mm CPQCI 1H-  
 PULPROG zgpg30  
 TD 65356  
 SOLVENT CDC13  
 NS 1024  
 DS 4  
 SWH 40760.871 Hz  
 FIDRES 0.623675 Hz  
 AQ 0.8017003 sec  
 RG 182.53  
 DW 12.267 usec  
 DE 18.00 usec  
 TE 298.0 K  
 D1 2.0000000 sec  
 D11 0.03000000 sec  
 TD0 1

===== CHANNEL f1 =====  
 SFO1 176.1232717 MHz  
 NUC1 13C  
 P1 12.00 usec  
 PLW1 105.0000000 W

===== CHANNEL f2 =====  
 SFO2 700.3628014 MHz  
 NUC2 1H  
 CPDPRG[2] waltz16  
 PCPD2 65.00 usec  
 PLW2 9.89999962 W  
 PLW12 0.15564001 W  
 PLW13 0.07837200 W

F2 - Processing parameters  
 SI 131072  
 SF 176.1056620 MHz  
 WDW EM  
 SSB 0  
 LB 1.00 Hz  
 GB 0  
 PC 1.40

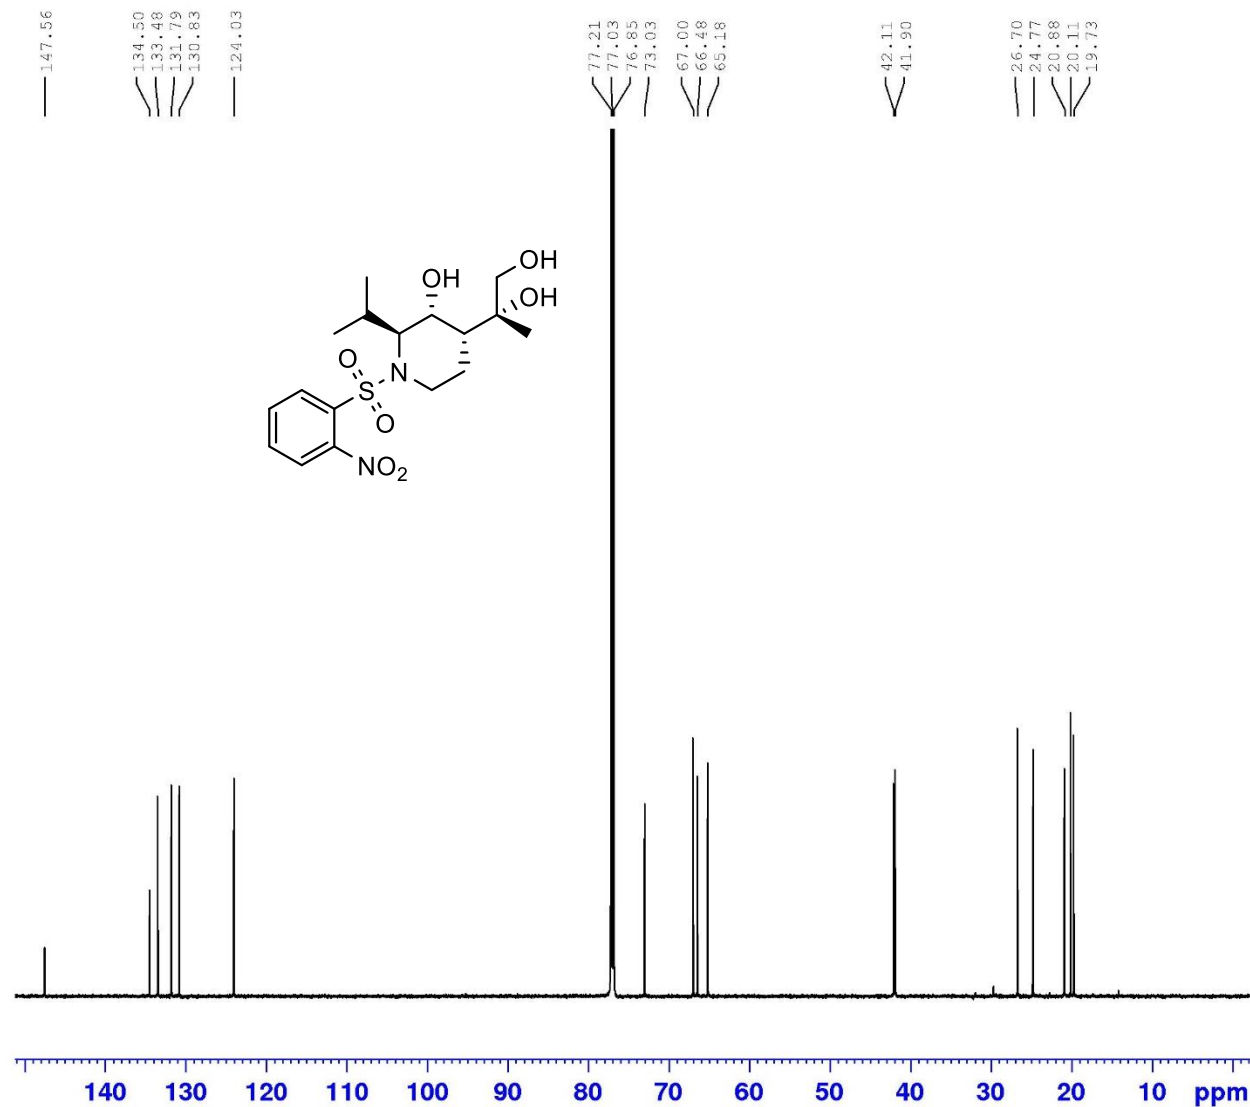

<sup>13</sup>C-NMR (R,R,R)-36a

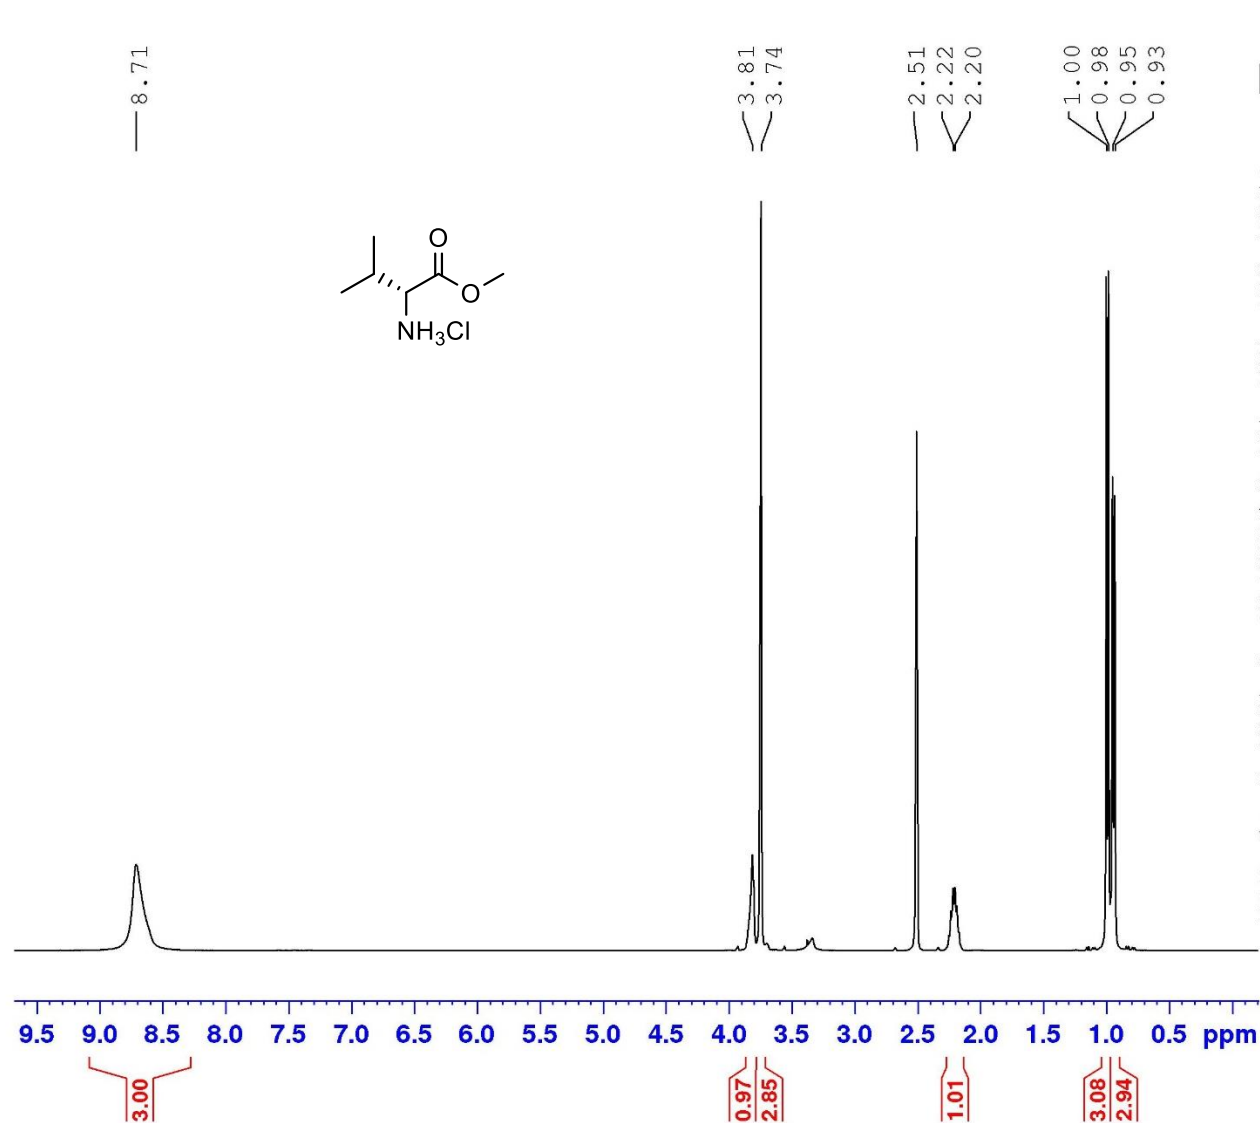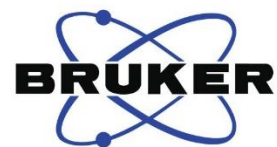

Current Data Parameters  
 NAME Mar05-2020  
 EXPNO 400  
 PROCNO 1

F2 - Acquisition Parameters  
 Date\_ 20200306  
 Time 3.10  
 INSTRUM spect  
 PROBHD 5 mm PABBO BB/  
 PULPROG zg30  
 TD 65536  
 SOLVENT DMSO  
 NS 16  
 DS 2  
 SWH 8012.820 Hz  
 FIDRES 0.122266 Hz  
 AQ 4.0894465 sec  
 RG 124.07  
 DW 62.400 usec  
 DE 6.50 usec  
 TE 298.0 K  
 D1 1.00000000 sec  
 TD0 1

===== CHANNEL f1 =====  
 SFO1 400.1024708 MHz  
 NUC1 1H  
 P1 13.70 usec  
 PLW1 12.00000000 W

F2 - Processing parameters  
 SI 65536  
 SF 400.1000000 MHz  
 WDW EM  
 SSB 0  
 LB 0.30 Hz  
 GB 0  
 PC 1.00

<sup>1</sup>H-NMR 25b

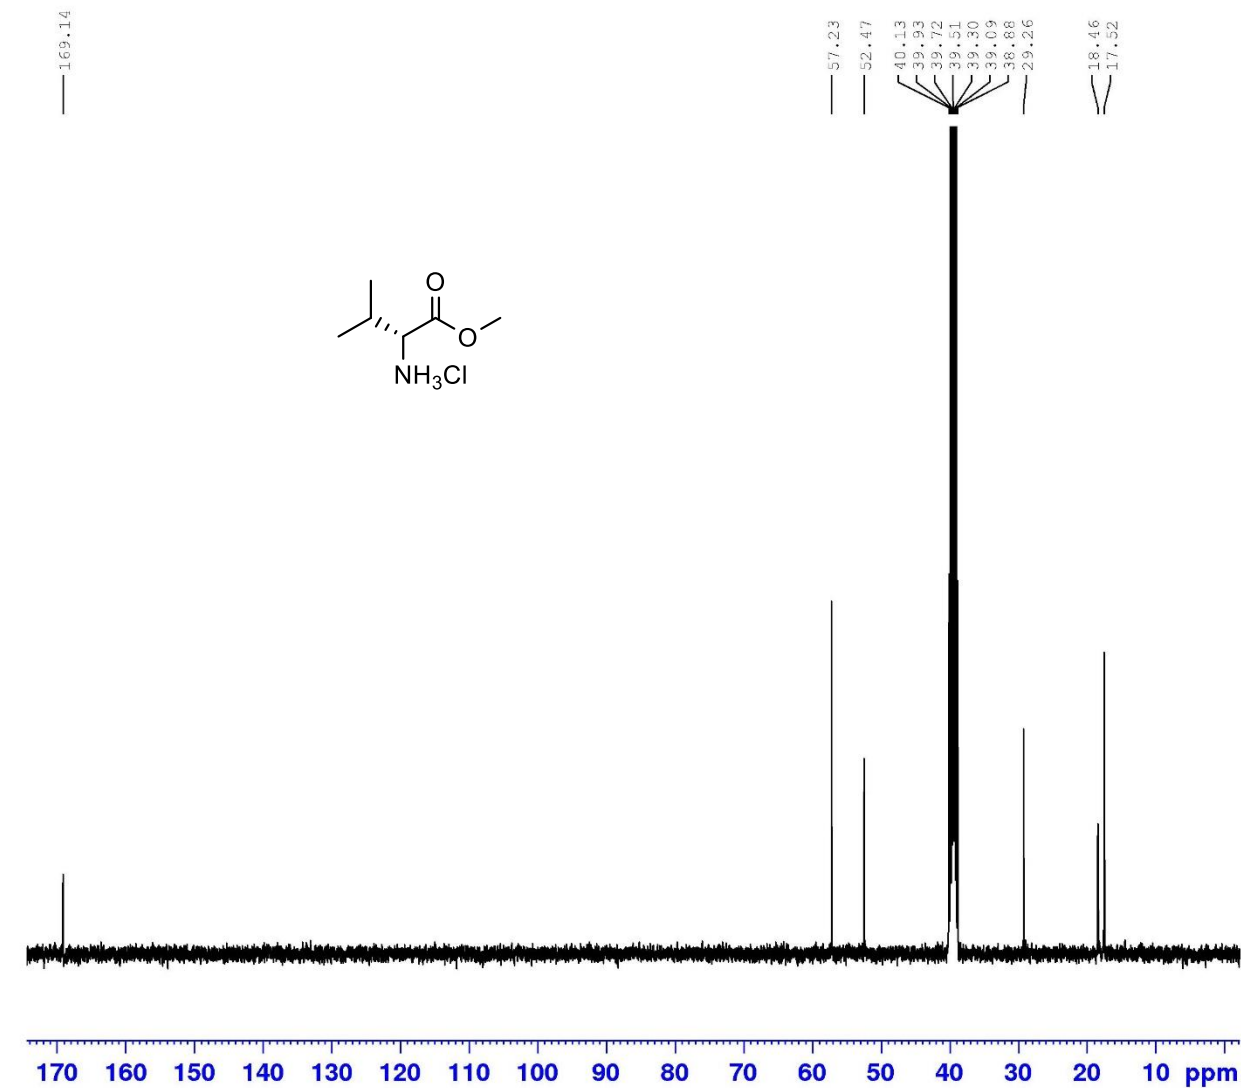

<sup>13</sup>C-NMR 25b

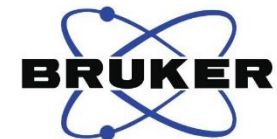

Current Data Parameters  
 NAME Mar05-2020  
 EXFNO 401  
 PROCNO 1

F2 - Acquisition Parameters  
 Date\_ 20200306  
 Time 3.40  
 INSTRUM spect  
 PROBHD 5 mm PABBO BB/  
 PULPROG zgpg30  
 TD 65536  
 SOLVENT DMSO  
 NS 512  
 DS 4  
 SWH 24038.461 Hz  
 FIDRES 0.366798 Hz  
 AQ 1.3631488 sec  
 RG 205.35  
 DW 20.800 usec  
 DE 6.50 usec  
 TE 298.0 K  
 D1 2.00000000 sec  
 D11 0.03000000 sec  
 TD0 1

===== CHANNEL f1 =====  
 SFO1 100.6152851 MHz  
 NUC1 13C  
 P1 10.00 usec  
 PLW1 48.00000000 W

===== CHANNEL f2 =====  
 SFO2 400.1016004 MHz  
 NUC2 1H  
 CPDPRG[2] waltz16  
 PCPD2 90.00 usec  
 PLW2 12.00000000 W  
 PLW12 0.27805999 W  
 PLW13 0.22522999 W

F2 - Processing parameters  
 SI 32768  
 SF 100.6052755 MHz  
 WDW EM  
 SSB 0  
 LB 1.00 Hz  
 GB 0  
 PC 1.40

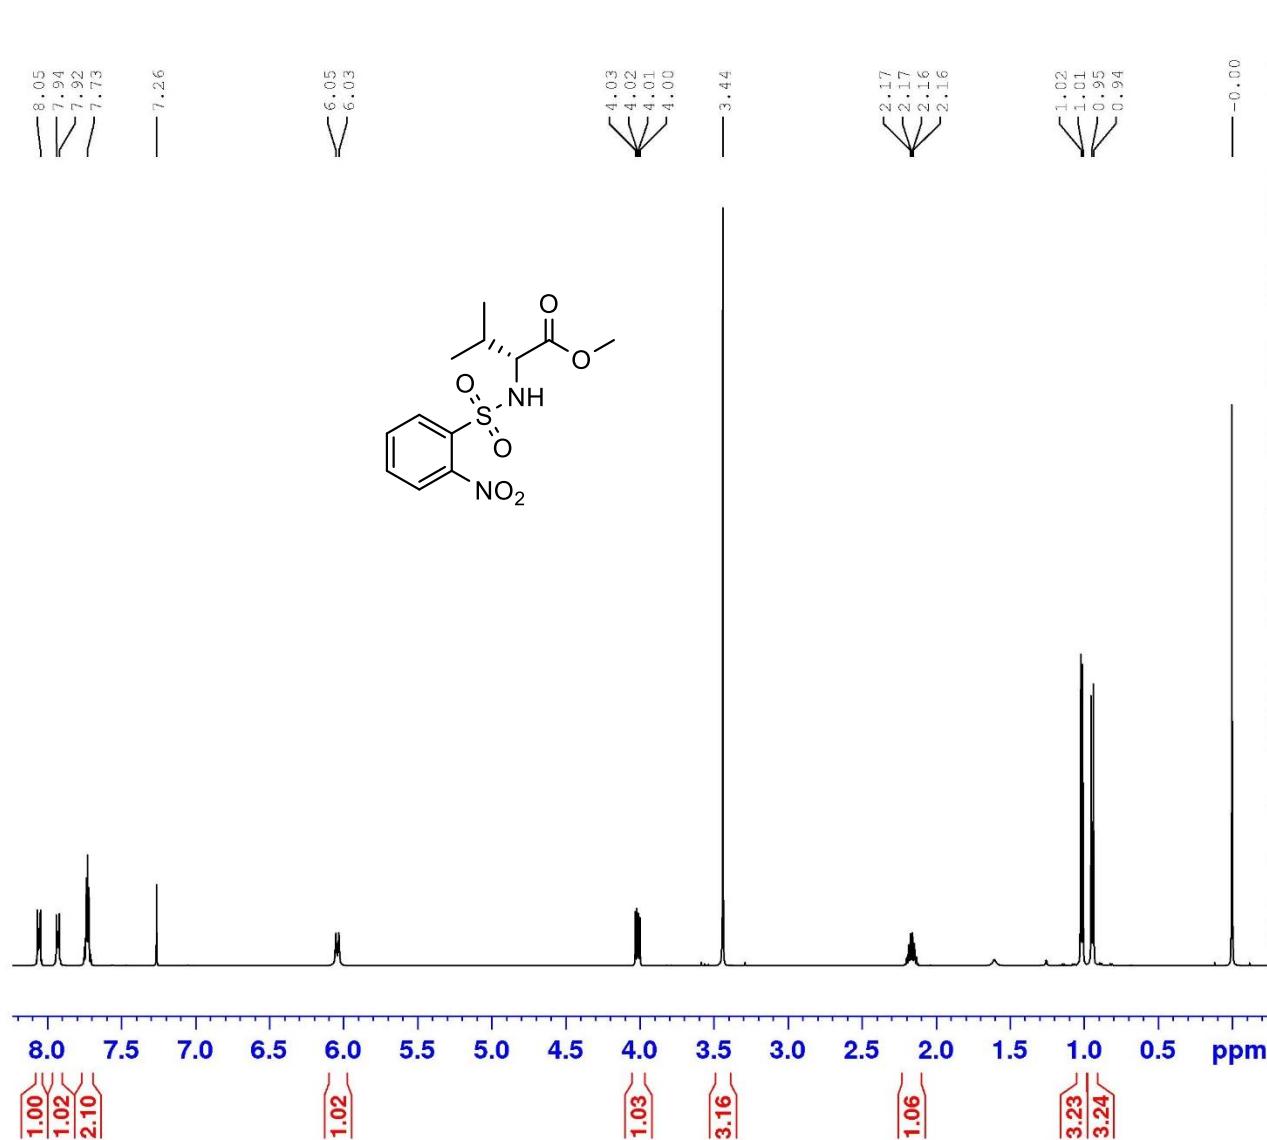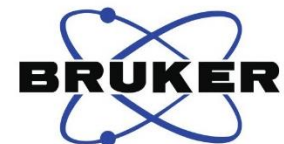

Current Data Parameters  
 NAME Mar04-2020  
 EXPNO 20  
 PROCNO 1

F2 - Acquisition Parameters  
 Date\_ 20200304  
 Time 7.03  
 INSTRUM spect  
 PROBHD 5 mm PABBO BB-  
 PULPROG zg30  
 TD 32768  
 SOLVENT CDCl3  
 NS 32  
 DS 0  
 SWH 10330.578 Hz  
 FIDRES 0.315264 Hz  
 AQ 1.5859712 sec  
 RG 322  
 DW 48.400 usec  
 DE 10.00 usec  
 TE 300.0 K  
 D1 2.00000000 sec  
 TDC 1

===== CHANNEL f1 =====  
 NUC1 1H  
 P1 11.23 usec  
 PL1 1.00 dB  
 PLLW 19.75309753 W  
 SFO1 500.1560886 MHz

F2 - Processing parameters  
 SI 16384  
 SF 500.1530140 MHz  
 WDW EM  
 SSB 0  
 LB 0.30 Hz  
 GB 0  
 PC 1.00

<sup>1</sup>H-NMR 26b

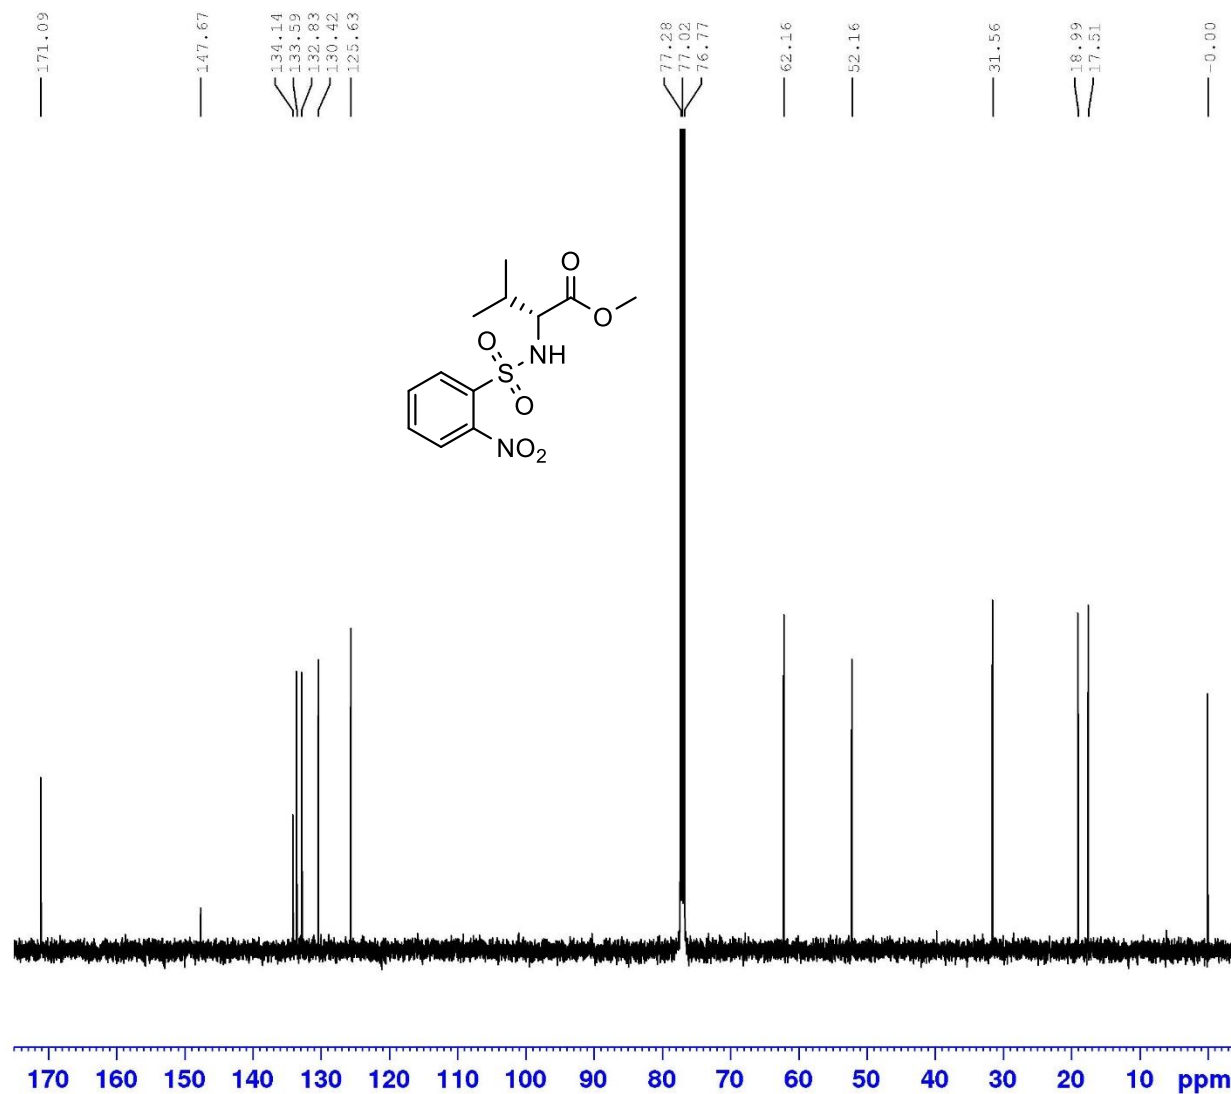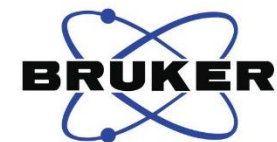

Current Data Parameters  
NAME Mar04-2020  
EXPNO 21  
PROCNO 1

F2 - Acquisition Parameters  
Date\_ 20200304  
Time 7.57  
INSTRUM spect  
PROBHD 5 mm PABBO BB-  
PULPROG zgpg30  
TD 65536  
SOLVENT CDCl3  
NS 1024  
DS 4  
SWH 32894.738 Hz  
FIDRES 0.501934 Hz  
AQ 0.9961472 sec  
RG 2300  
DW 15.200 usec  
DE 10.00 usec  
TE 296.0 K  
D1 2.00000000 sec  
D11 0.03000000 sec  
TD0 1

===== CHANNEL f1 =====  
NUC1 13C  
P1 10.20 usec  
PL1 1.50 dB  
PL1W 51.74793243 W  
SFO1 125.7761482 MHz

===== CHANNEL f2 =====  
CPDPRG2 waltz16  
NUC2 1H  
PCPD2 100.00 usec  
PL2 1.00 dB  
PL12 19.99 dB  
PL13 21.00 dB  
PL2W 19.75309753 W  
PL12W 0.24925002 W  
PL13W 0.19753097 W  
SFO2 500.1550006 MHz

F2 - Processing parameters  
SI 32768  
SF 125.7635739 MHz  
WDW EM  
SSB 0  
LB 1.00 Hz  
GB 0  
PC 1.40

<sup>13</sup>C-NMR 26b

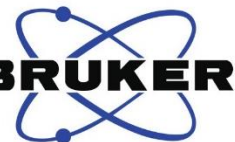

Current Data Parameters  
NAME Mar04-2020  
EXPNO 30  
PROCNO 1

F2 - Acquisition Parameters  
Date\_ 20200304  
Time 13.35  
INSTRUM spect  
PROBHD 5 mm PABBO BB-  
PULPROG zg30  
TD 32768  
SOLVENT CDCl3  
NS 32  
DS 0  
SWH 10330.578 Hz  
FIDRES 0.315264 Hz  
AQ 1.5859712 sec  
RG 322  
DW 48.400 usec  
DE 10.00 usec  
TE 300.0 K  
D1 2.00000000 sec  
TDC 1

===== CHANNEL f1 =====  
NUC1 1H  
P1 11.23 usec  
PL1 1.00 dB  
PL1W 19.75309753 W  
SFO1 500.1560886 MHz

F2 - Processing parameters  
SI 16384  
SF 500.1530146 MHz  
WDW EM  
SSB 0  
LB 0.30 Hz  
GB 0  
PC 1.00

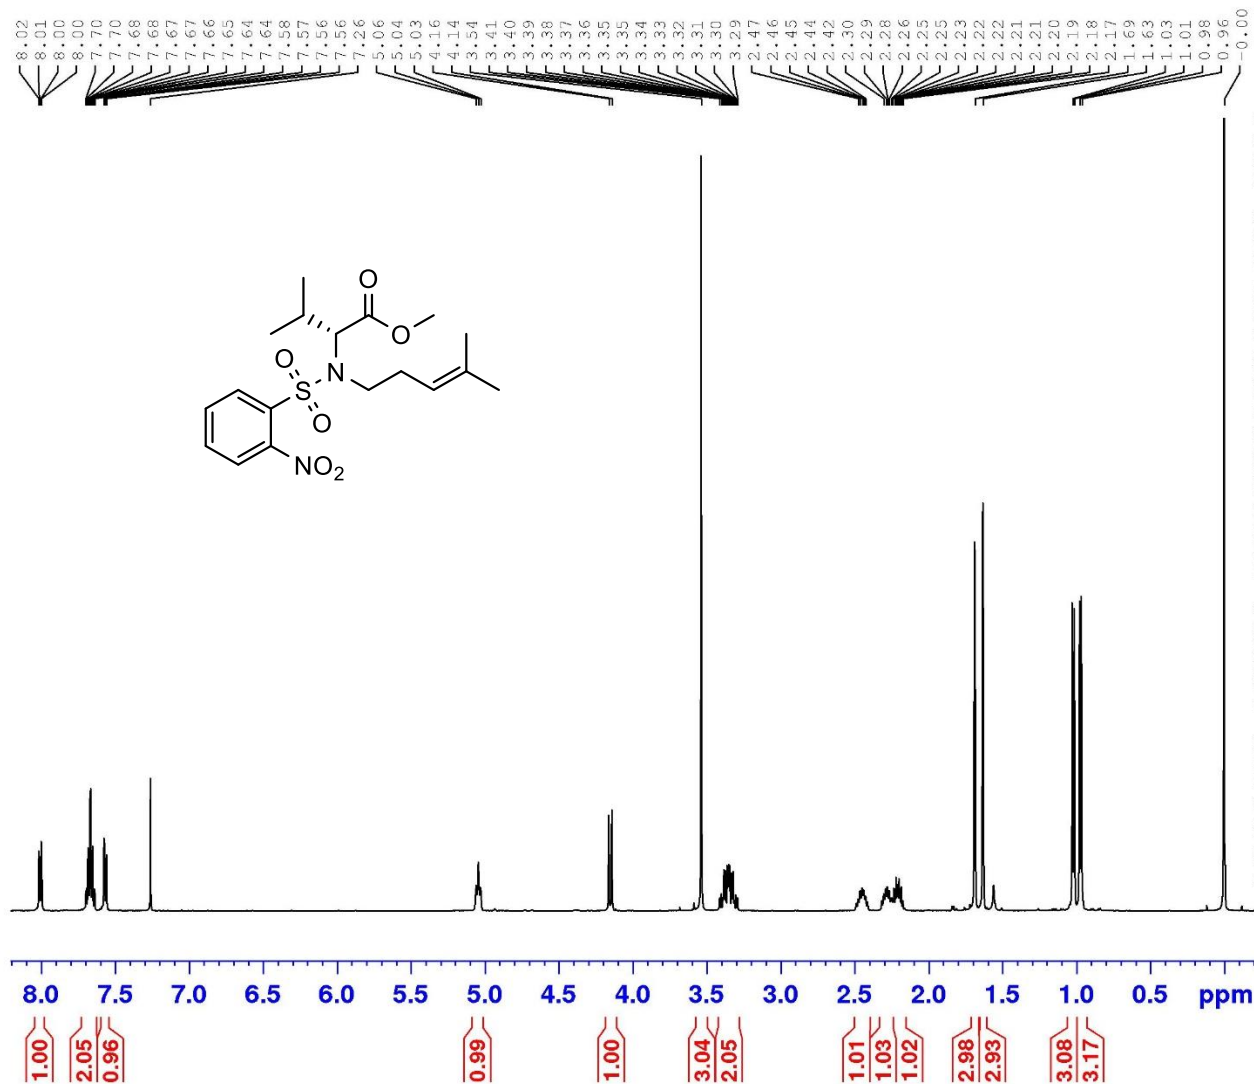

<sup>1</sup>H-NMR 27b

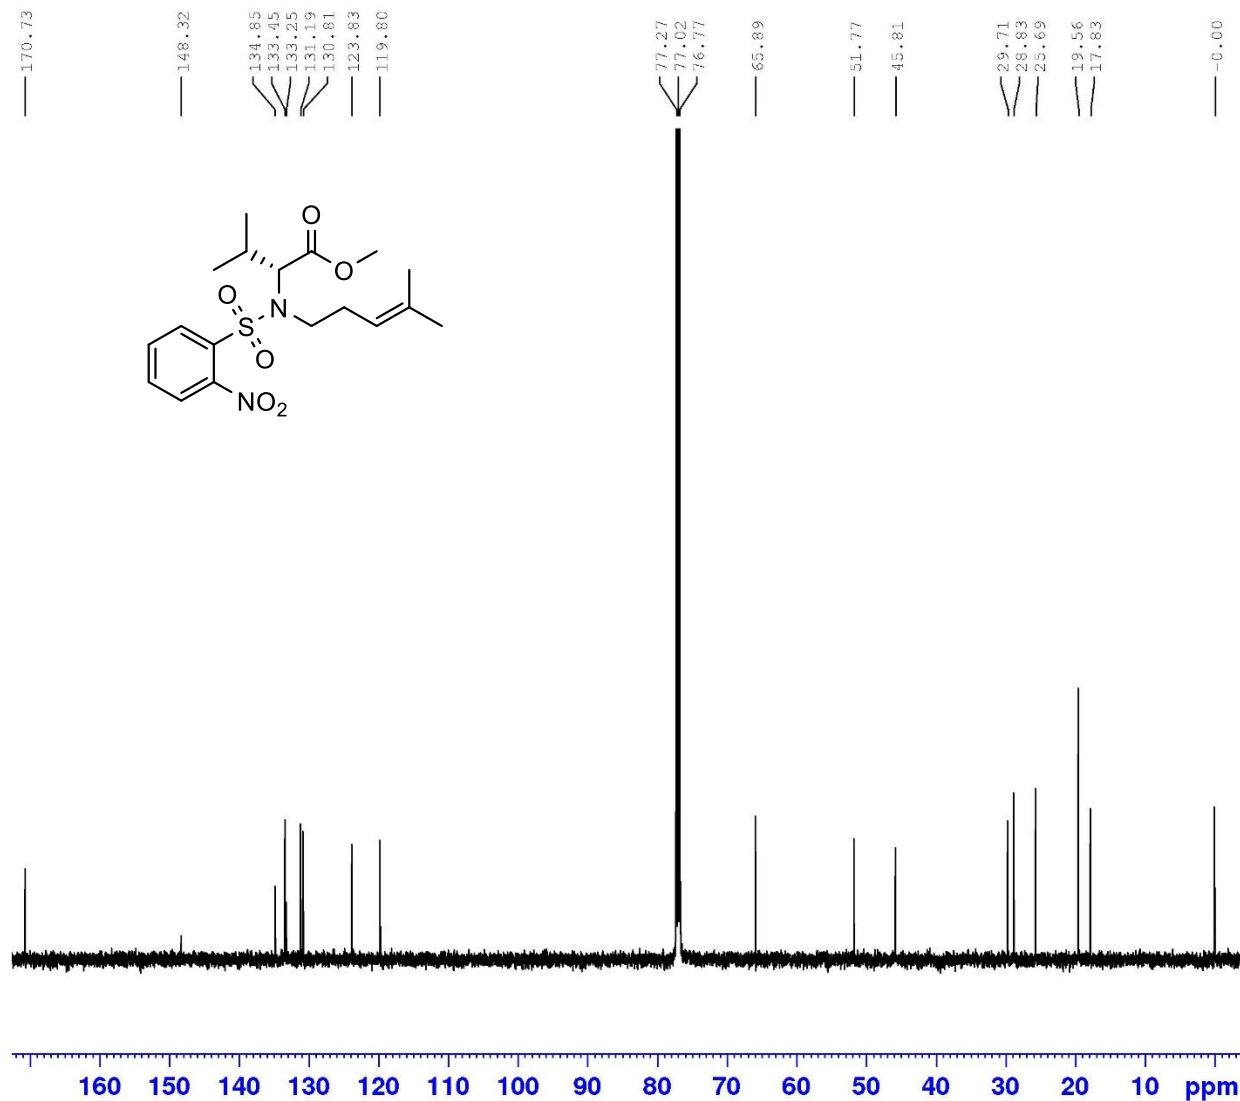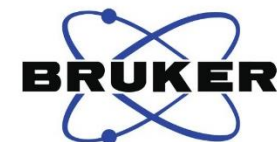

Current Data Parameters  
NAME Mar04-2020  
EXPNO 31  
PROCNO 1

F2 - Acquisition Parameters  
Date\_ 20200304  
Time 14.28  
INSTRUM spect  
PROBHD 5 mm PABBO BB-  
PULPROG zgpg30  
TD 65536  
SOLVENT CDCl3  
NS 1024  
DS 4  
SWH 32894.738 Hz  
FIDRES 0.501934 Hz  
AQ 0.9961472 sec  
RG 2300  
DW 15.200 usec  
DE 10.00 usec  
TE 296.0 K  
D1 2.00000000 sec  
D11 0.03000000 sec  
TD0 1

===== CHANNEL f1 =====  
NUC1 13C  
P1 10.20 usec  
PL1 1.50 dB  
PL1W 51.74793243 W  
SFO1 125.7761482 MHz

===== CHANNEL f2 =====  
CPDPRG[2] waltz16  
NUC2 1H  
PCPD2 100.00 usec  
PL2 1.00 dB  
PL12 19.99 dB  
PL13 21.00 dB  
PL2W 19.75309753 W  
PL12W 0.24925002 W  
PL13W 0.19753097 W  
SFO2 500.1550006 MHz

F2 - Processing parameters  
SI 32768  
SF 125.7635740 MHz  
WDW EM  
SSB 0  
LB 1.00 Hz  
GB 0  
PC 1.40

<sup>13</sup>C-NMR 27b

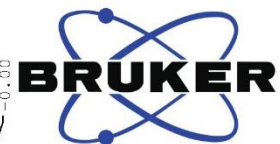

Current Data Parameters  
 NAME May15-2020  
 EXPNO 50  
 PROCNO 1

F2 - Acquisition Parameters  
 Date\_ 20200515  
 Time 17.56  
 INSTRUM spect  
 PROBHD 5 mm PABBO BB-  
 PULPROG zg30  
 TD 32768  
 SOLVENT CDCl3  
 NS 32  
 DS 0  
 SWH 10330.578 Hz  
 FIDRES 0.315264 Hz  
 AQ 1.5859712 sec  
 RG 36  
 DW 48.400 usec  
 DE 10.00 usec  
 TE 296.0 K  
 D1 2.00000000 sec  
 TDO 1

===== CHANNEL f1 =====  
 NUC1 1H  
 P1 11.23 usec  
 PL1 1.00 dB  
 PL1W 19.75309753 W  
 SFO1 500.1560886 MHz

F2 - Processing parameters  
 SI 16384  
 SF 500.1530047 MHz  
 WDW EM  
 SSB 0  
 LB 0.30 Hz  
 GB 0  
 PC 1.00

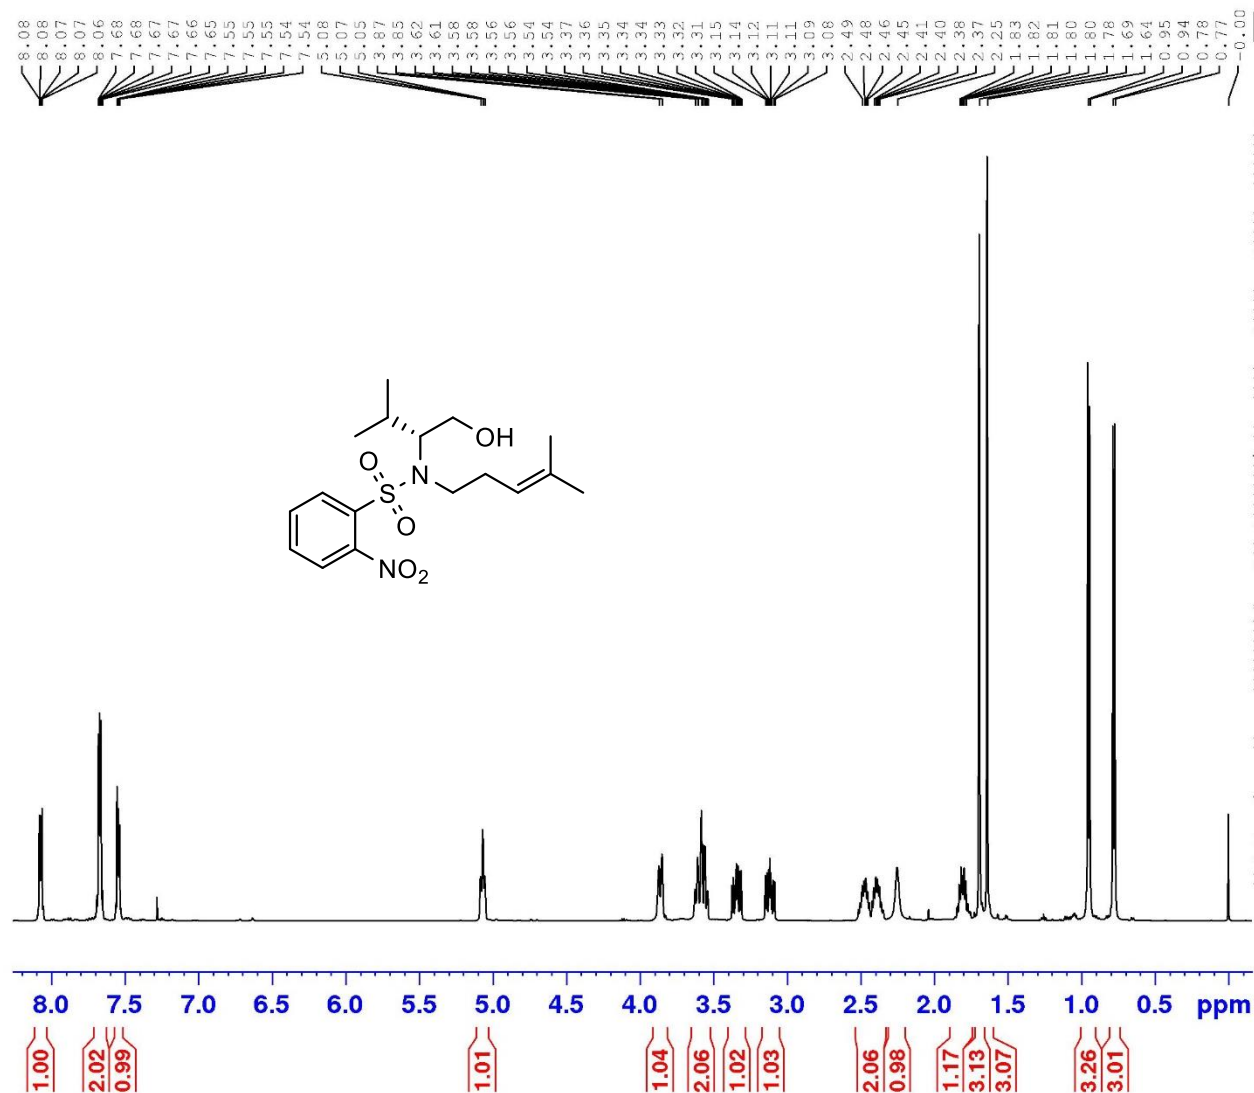

<sup>1</sup>H-NMR 28b

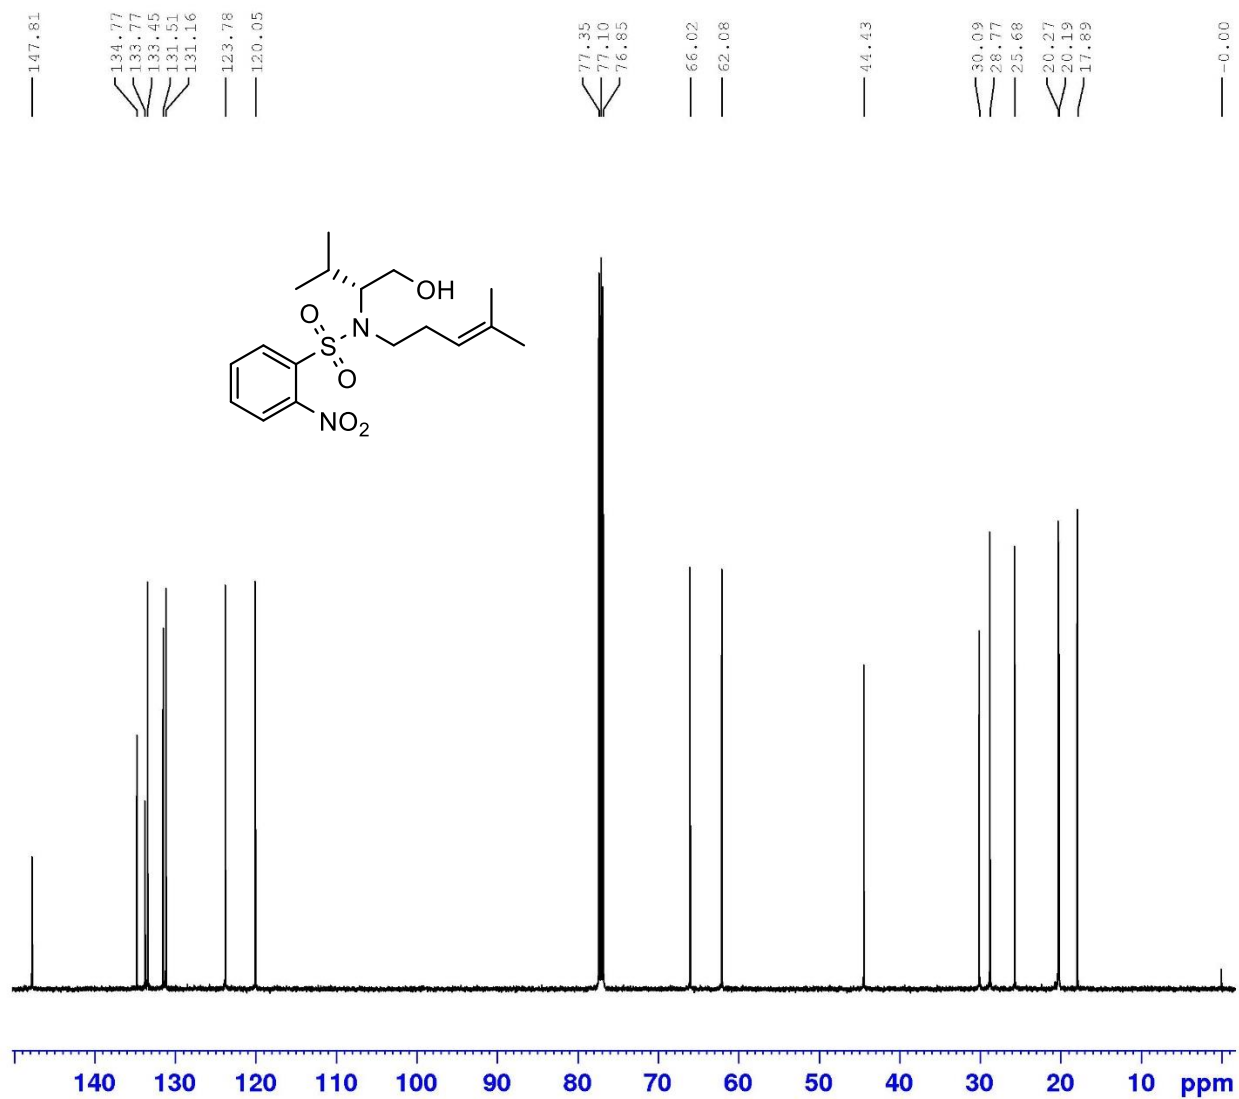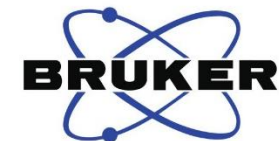

Current Data Parameters  
 NAME May15-2020  
 EXPNO 51  
 PROCNO 1

F2 - Acquisition Parameters  
 Date\_ 20200515  
 Time 18.49  
 INSTRUM spect  
 PROBHD 5 mm PABBO BB-  
 PULPROG zgpg30  
 TD 65536  
 SOLVENT CDCl3  
 NS 1024  
 DS 4  
 SWH 32894.738 Hz  
 FIDRES 0.501934 Hz  
 AQ 0.9961472 sec  
 RG 2300  
 DW 15.200 usec  
 DE 10.00 usec  
 TE 296.0 K  
 D1 2.00000000 sec  
 D11 0.03000000 sec  
 TD0 1

===== CHANNEL f1 =====  
 NUC1 13C  
 P1 10.20 usec  
 PL1 1.50 dB  
 PL1W 51.74793243 W  
 SFO1 125.7761482 MHz

===== CHANNEL f2 =====  
 CPDPRG[2] waltz16  
 NUC2 1H  
 PCPD2 100.00 usec  
 PL2 1.00 dB  
 PL12 19.99 dB  
 PL13 21.00 dB  
 PL2W 19.75309753 W  
 PL12W 0.24925002 W  
 PL13W 0.19753097 W  
 SFO2 500.1550006 MHz

F2 - Processing parameters  
 SI 32768  
 SF 125.7635743 MHz  
 WDW EM  
 SSB 0  
 LB 1.00 Hz  
 GB 0  
 PC 1.40

<sup>13</sup>C-NMR 28b

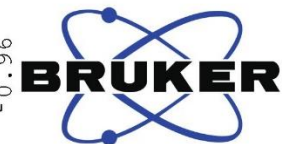

Current Data Parameters  
 NAME Jun04-2020  
 EXPNO 60  
 PROCNO 1

F2 - Acquisition Parameters  
 Date\_ 20200604  
 Time 16.15  
 INSTRUM spect  
 PROBHD 5 mm CPQCI 1H-  
 PULPROG zg  
 TD 65536  
 SOLVENT CDCl3  
 NS 16  
 DS 2  
 SWH 10504.202 Hz  
 FIDRES 0.160281 Hz  
 AQ 3.1195135 sec  
 RG 12.77  
 DW 47.600 usec  
 DE 20.00 usec  
 TE 298.0 K  
 D1 2.00000000 sec  
 TDO 1

===== CHANNEL f1 =====  
 SFO1 700.3632917 MHz  
 NUC1 1H  
 P1 8.15 usec  
 PLW1 9.89999962 W

F2 - Processing parameters  
 SI 65536  
 SF 700.3600178 MHz  
 WDW EM  
 SSB 0  
 LB 0.30 Hz  
 GB 0  
 PC 1.00

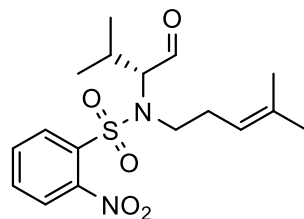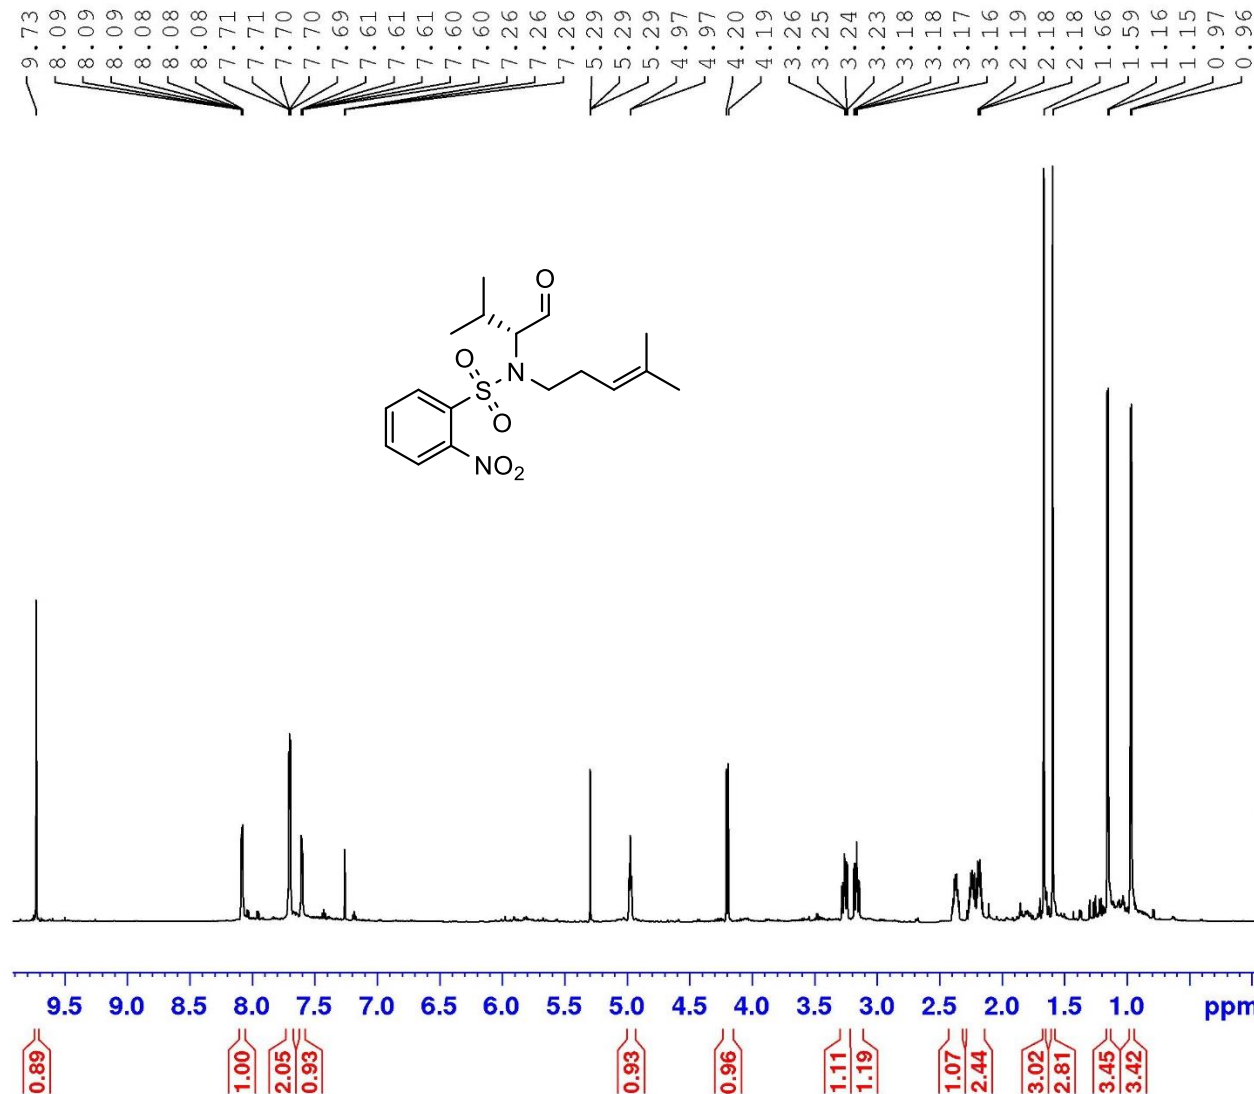

<sup>1</sup>H-NMR 29b

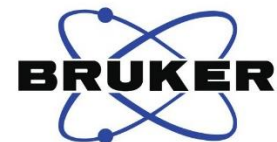

Current Data Parameters  
 NAME Jun04-2020  
 EXPNO 61  
 PROCNO 1

F2 - Acquisition Parameters  
 Date\_ 20200604  
 Time 16.28  
 INSTRUM spect  
 PROBHD 5 mm CPQCI 1H-  
 PULPROG zgpg30  
 TD 65356  
 SOLVENT CDCl3  
 NS 512  
 DS 4  
 SWH 40760.871 Hz  
 FIDRES 0.623675 Hz  
 AQ 0.8017003 sec  
 RG 182.53  
 DW 12.267 usec  
 DE 18.00 usec  
 TE 298.0 K  
 D1 2.00000000 sec  
 D11 0.03000000 sec  
 TD0 1

===== CHANNEL f1 =====  
 SFO1 176.1232717 MHz  
 NUC1 13C  
 P1 12.00 usec  
 PLW1 105.00000000 W

===== CHANNEL f2 =====  
 SFO2 700.3628014 MHz  
 NUC2 1H  
 CPDPRG[2] waltz16  
 PCPD2 65.00 usec  
 PLW2 9.89999962 W  
 PLW12 0.15564001 W  
 PLW13 0.07837200 W

F2 - Processing parameters  
 SI 131072  
 SF 176.1056620 MHz  
 WDW EM  
 SSB 0  
 LB 1.00 Hz  
 GB 0  
 PC 1.40

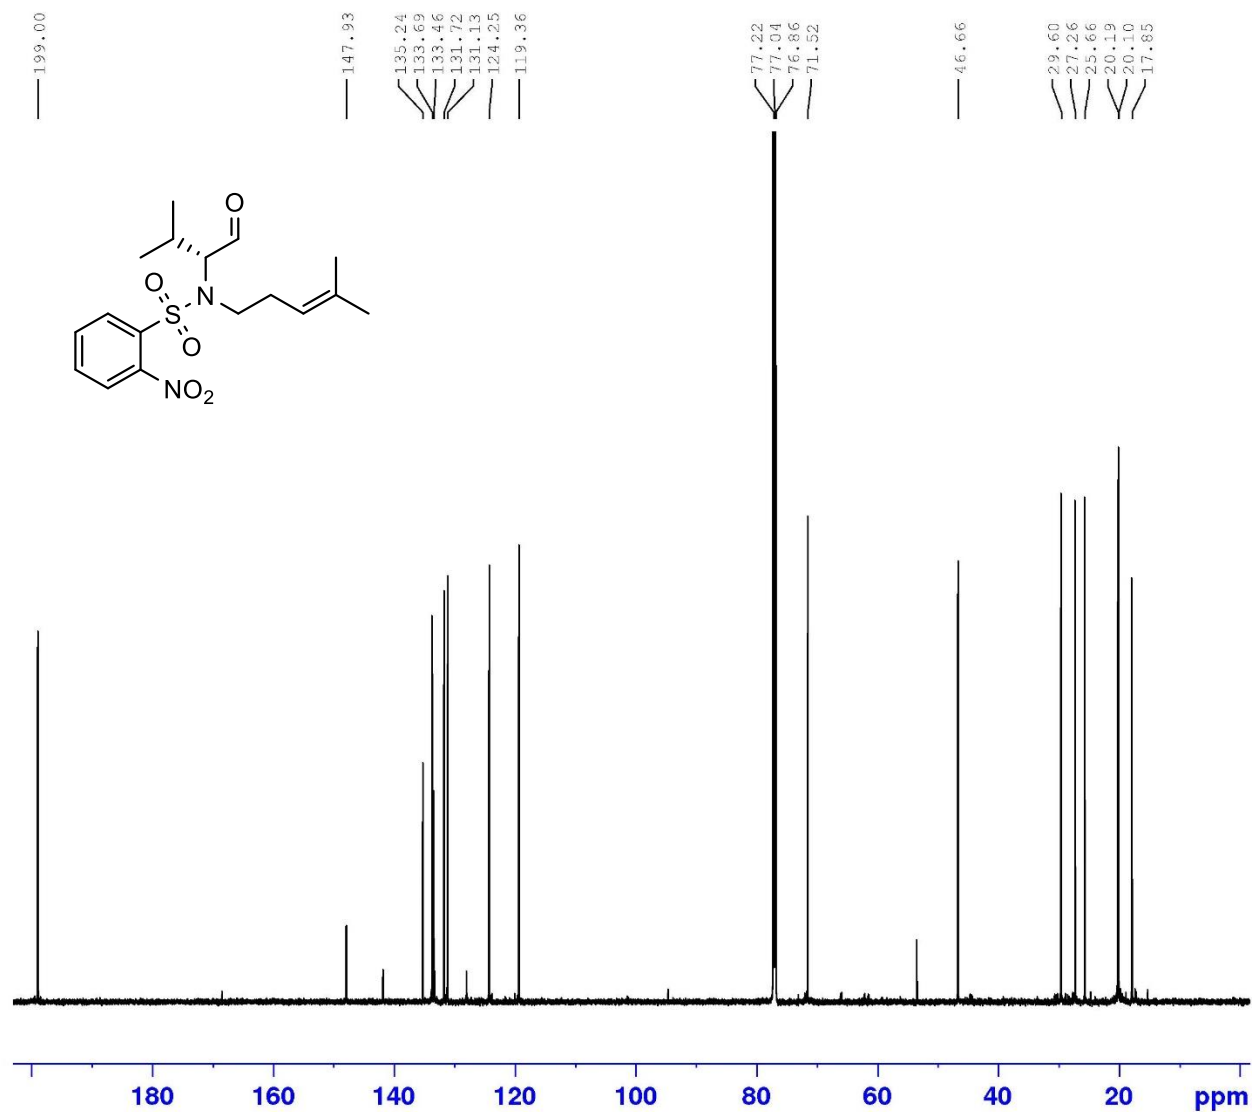

<sup>13</sup>C-NMR 29b

8.14  
8.13  
8.12  
7.64  
7.64  
7.63  
7.54  
7.53  
7.52  
7.27

4.93  
4.68

4.08  
4.05  
3.70  
3.68  
3.12  
3.10  
3.07  
2.27  
2.25  
2.09  
2.07  
2.06  
2.05  
2.04  
2.03  
2.01  
1.99  
1.87  
1.86  
1.85  
1.84  
1.82  
1.81  
1.77  
1.42  
1.40  
1.04  
1.03  
0.86  
0.85

-0.00

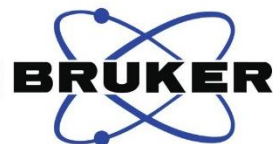

Current Data Parameters  
NAME Apr06-2020  
EXPNO 110  
PROCNO 1

F2 - Acquisition Parameters  
Date\_ 20200407  
Time 6.09  
INSTRUM spect  
PROBHD 5 mm PABBO BB-  
PULPROG zg30  
TD 32768  
SOLVENT CDCl3  
NS 32  
DS 0  
SWH 10330.578 Hz  
FIDRES 0.315264 Hz  
AQ 1.5859712 sec  
RG 101  
DW 48.400 usec  
DE 10.00 usec  
TE 300.0 K  
D1 2.00000000 sec  
TD0 1

===== CHANNEL f1 =====  
NUC1 1H  
P1 11.23 usec  
PL1 1.00 dB  
PL1W 19.75309753 W  
SFO1 500.1360886 MHz

F2 - Processing parameters  
SI 16384  
SF 500.1360104 MHz  
WDW EM  
SSB 0  
LB 0.30 Hz  
GB 0  
PC 1.00

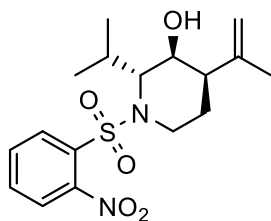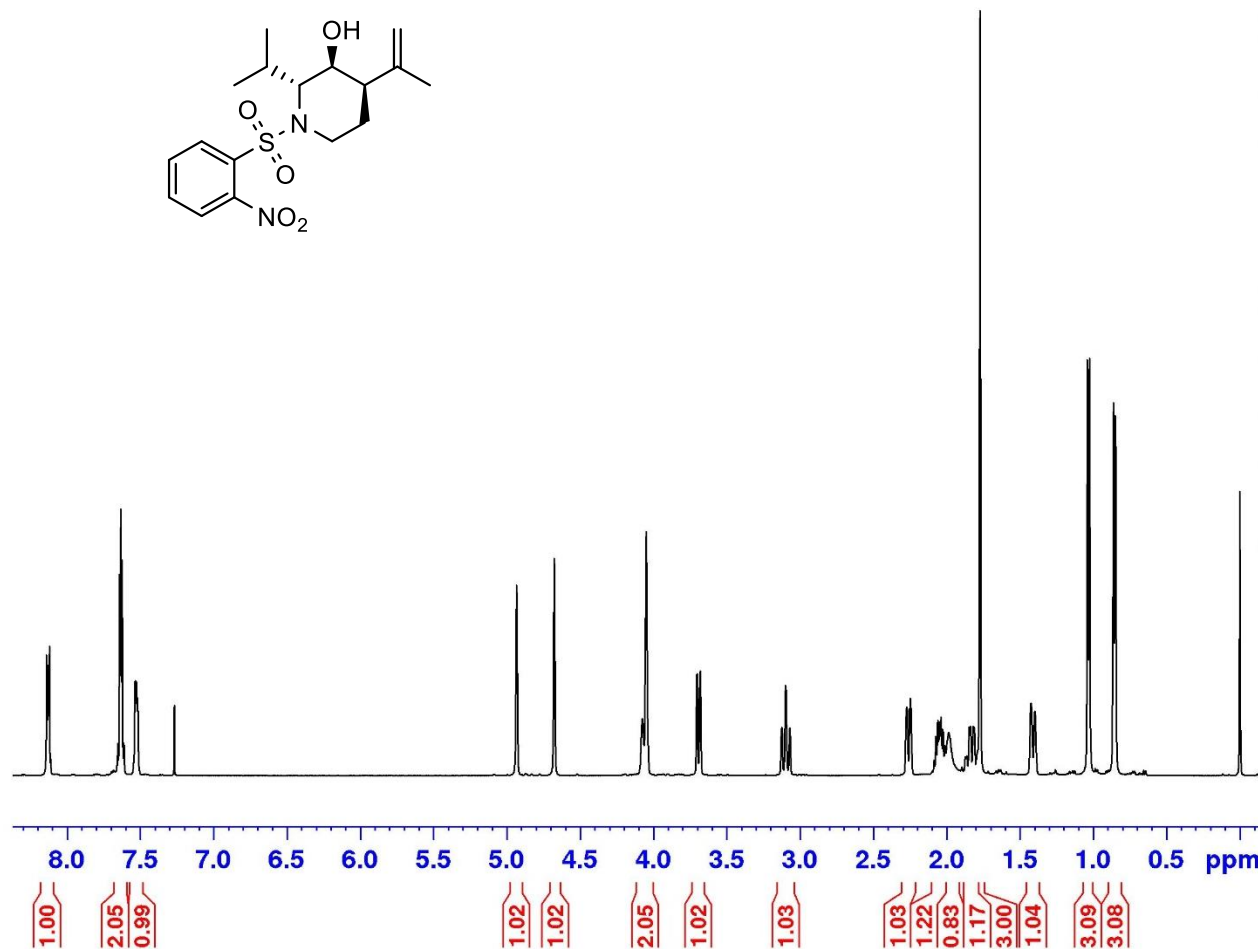

<sup>1</sup>H-NMR (S,R)-30b

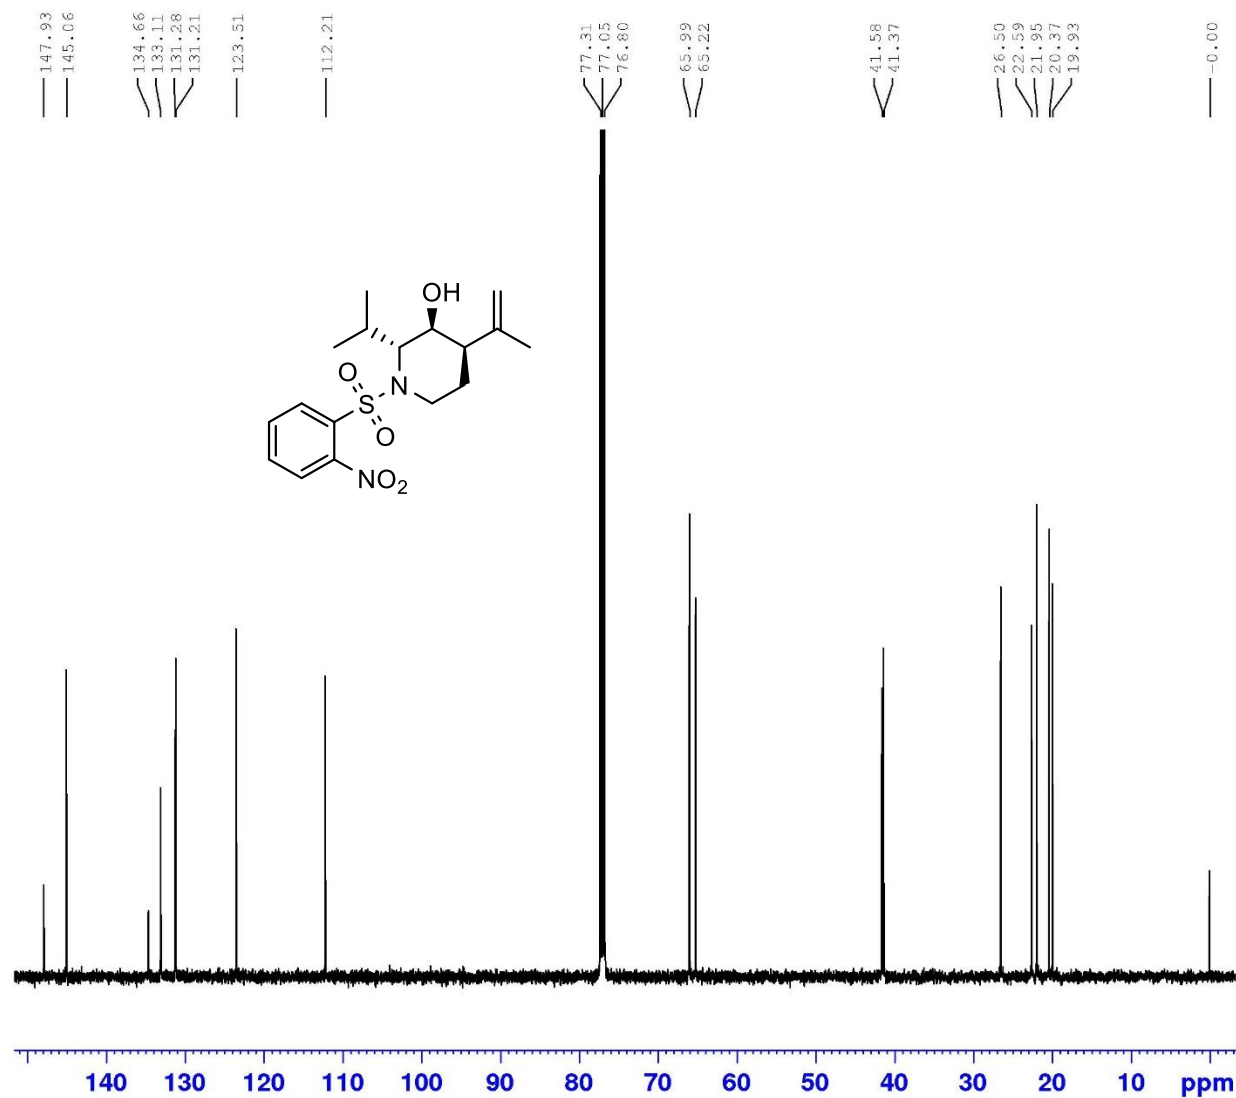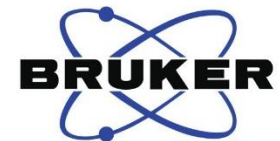

Current Data Parameters  
NAME Apr06-2020  
EXPNO 111  
PROCNO 1

F2 - Acquisition Parameters  
Date\_ 20200407  
Time 7.02  
INSTRUM spect  
PROBHD 5 mm PABBO BB-  
PULPROG zgpg30  
TD 65536  
SOLVENT CDCl3  
NS 1024  
DS 4  
SWH 32894.738 Hz  
FIDRES 0.501934 Hz  
AQ 0.9961472 sec  
RG 2580  
DW 15.200 usec  
DE 10.00 usec  
TE 300.0 K  
D1 2.00000000 sec  
D11 0.03000000 sec  
TD0 1

===== CHANNEL f1 =====  
NUC1 13C  
P1 10.20 usec  
PL1 1.50 dB  
PL1W 51.74793243 W  
SFO1 125.7761482 MHz

===== CHANNEL f2 =====  
CPDPRG2 waltz16  
NUC2 1H  
PCPD2 100.00 usec  
PL2 1.00 dB  
PL12 19.99 dB  
PL13 21.00 dB  
PL2W 19.75309753 W  
PL12W 0.24925002 W  
PL13W 0.19753097 W  
SFO2 500.1550006 MHz

F2 - Processing parameters  
SI 32768  
SF 125.7635748 MHz  
WDW EM  
SSB 0  
LB 1.00 Hz  
GB 0  
PC 1.40

<sup>13</sup>C-NMR (S,R)-30b

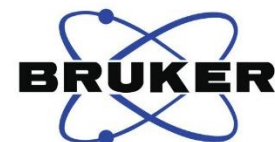

Current Data Parameters  
 NAME May31-2021  
 EXPNO 60  
 PROCNO 1

F2 - Acquisition Parameters  
 Date\_ 20210531  
 Time 14.02  
 INSTRUM spect  
 PROBHD 5 mm PABBO BB-  
 PULPROG zg30  
 TD 32768  
 SOLVENT CDCl3  
 NS 32  
 DS 0  
 SWH 10330.578 Hz  
 FIDRES 0.315264 Hz  
 AQ 1.5859712 sec  
 RG 128  
 DW 48.400 usec  
 DE 10.00 usec  
 TE 296.0 K  
 D1 2.00000000 sec  
 TD0 1

===== CHANNEL f1 =====  
 NUC1 1H  
 P1 11.23 usec  
 PL1 1.00 dB  
 PL1W 19.75309753 W  
 SFO1 500.1560886 MHz

F2 - Processing parameters  
 SI 16384  
 SF 500.1530151 MHz  
 WDW EM  
 SSB 0  
 LB 0.30 Hz  
 GB 0  
 PC 1.00

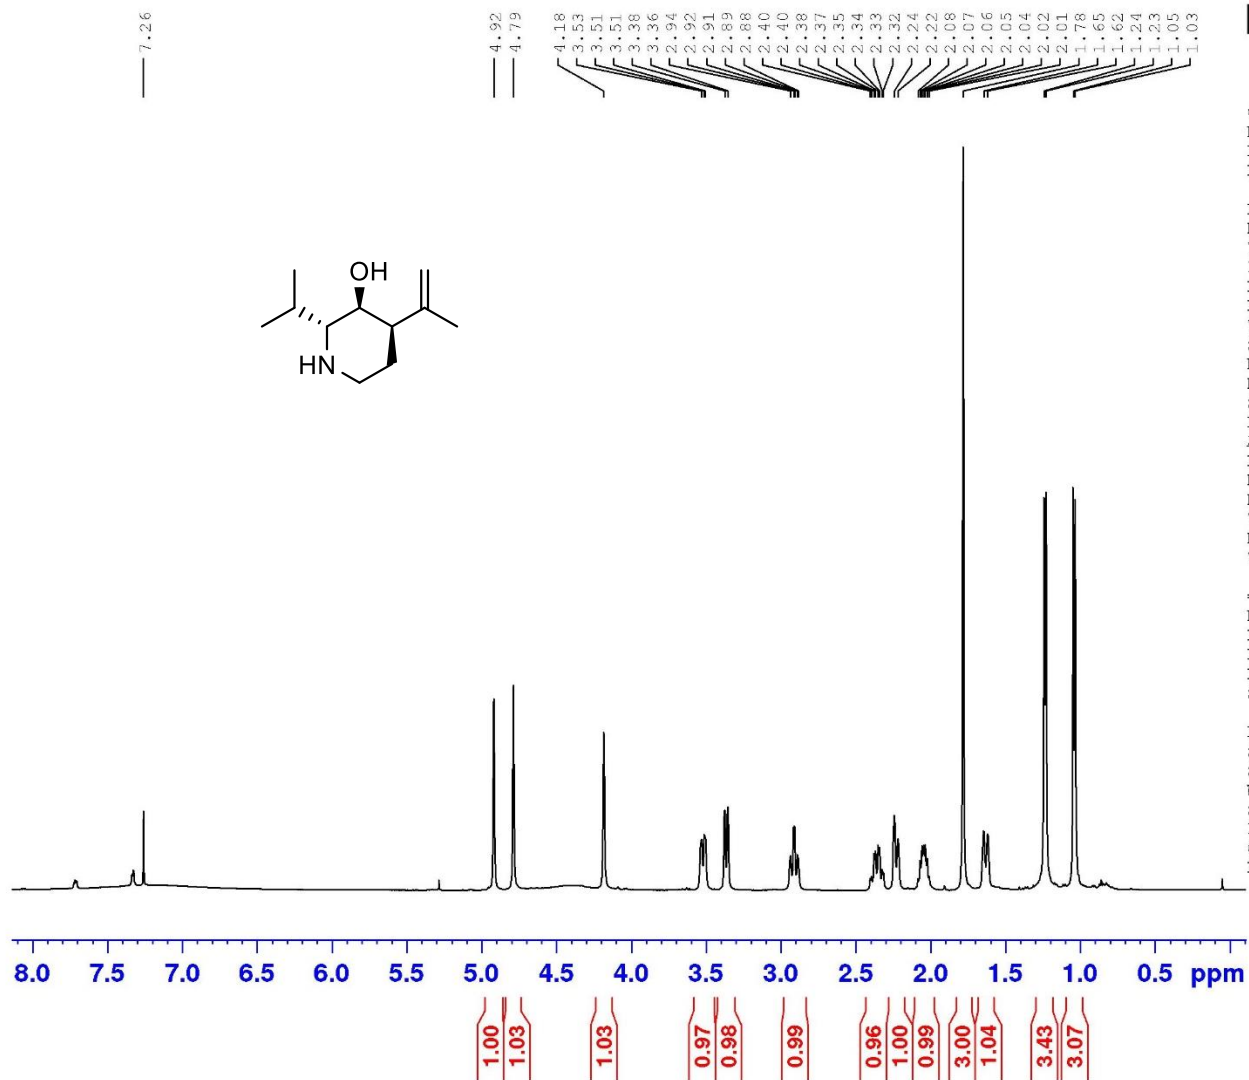

<sup>1</sup>H-NMR (S,R)-31b

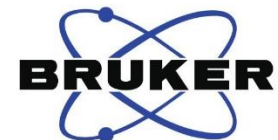

Current Data Parameters  
 NAME May31-2021  
 EXPNO 21  
 PROCNO 1

F2 - Acquisition Parameters  
 Date\_ 20210531  
 Time 10.41  
 INSTRUM spect  
 PROBHD 5 mm CPQCI 1H-  
 PULPROG zgpg30  
 TD 65356  
 SOLVENT CDC13  
 NS 512  
 DS 4  
 SWH 40760.871 Hz  
 FIDRES 0.623675 Hz  
 AQ 0.8017003 sec  
 RG 182.53  
 DW 12.267 usec  
 DE 18.00 usec  
 TE 298.0 K  
 D1 2.00000000 sec  
 D11 0.03000000 sec  
 TD0 1

===== CHANNEL f1 =====  
 SFO1 176.1232717 MHz  
 NUC1 13C  
 P1 12.00 usec  
 PLW1 105.00000000 W

===== CHANNEL f2 =====  
 SFO2 700.3628014 MHz  
 NUC2 1H  
 CPDPRG[2] waltz16  
 PCPD2 65.00 usec  
 PLW2 9.89999962 W  
 PLW12 0.15564001 W  
 PLW13 0.07837200 W

F2 - Processing parameters  
 SI 131072  
 SF 176.1056620 MHz  
 WDW EM  
 SSB 0  
 LB 1.00 Hz  
 GB 0  
 PC 1.40

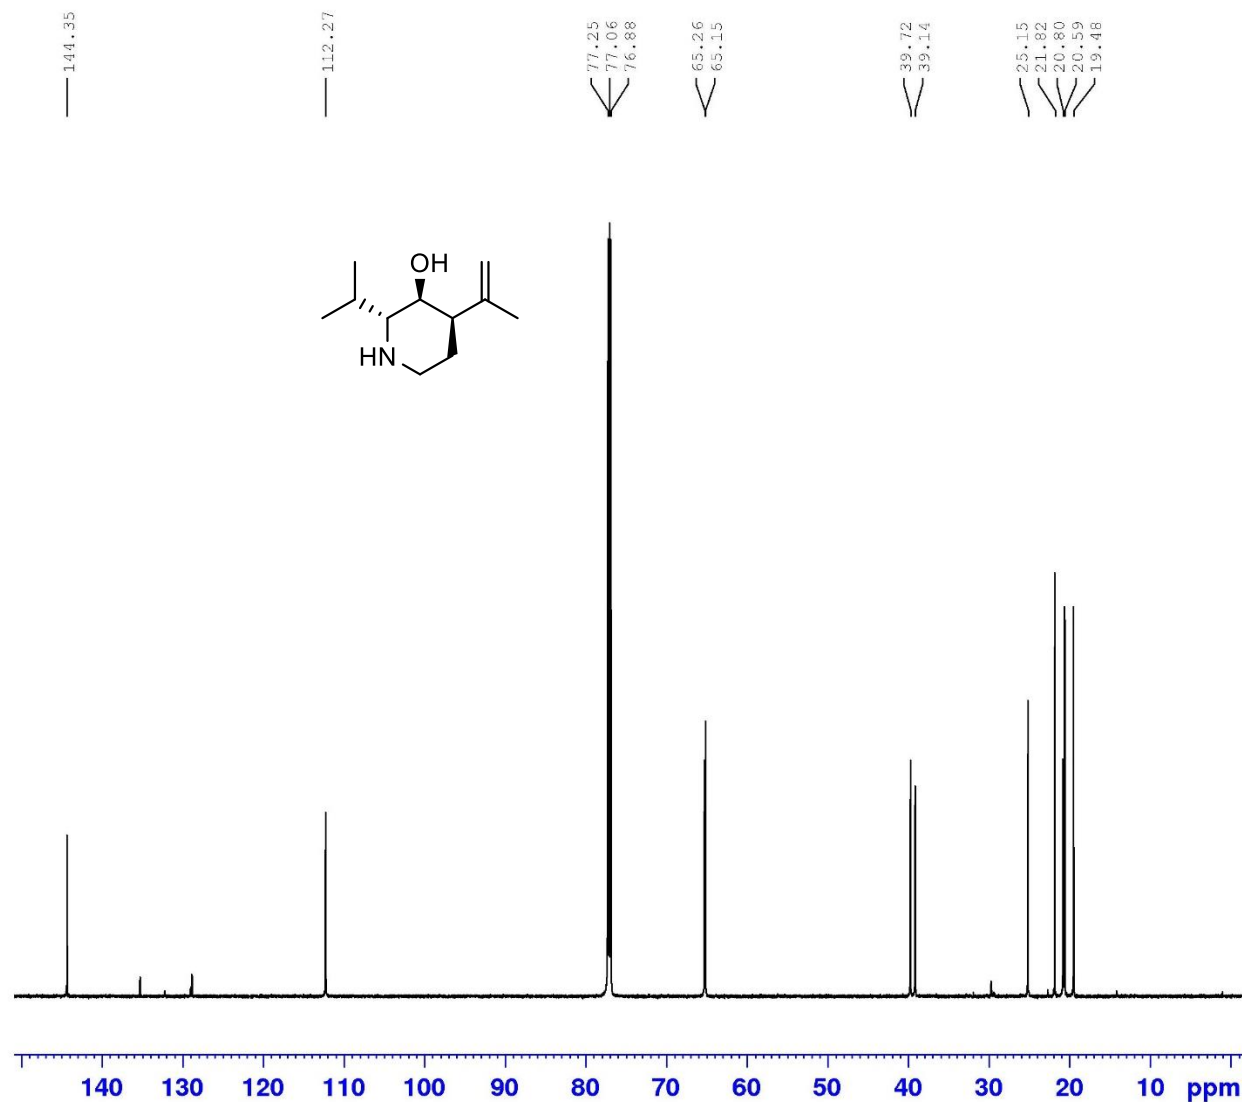

<sup>13</sup>C-NMR (S,R)-31b

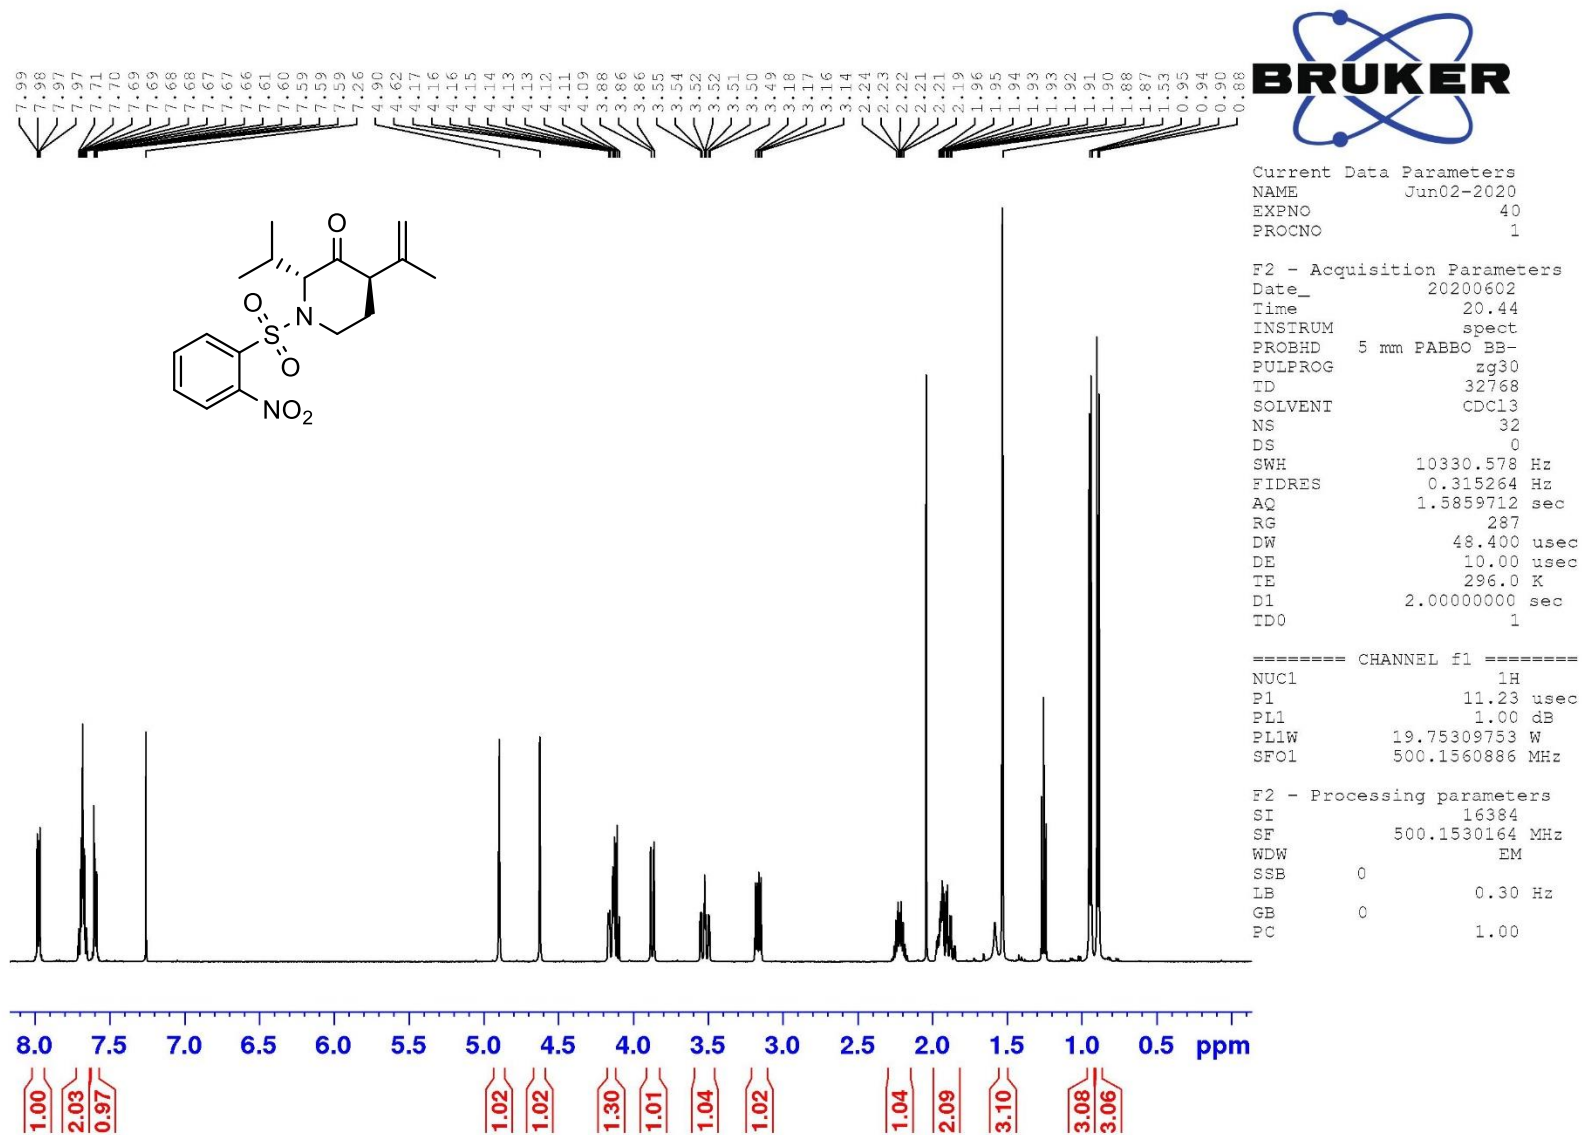

<sup>1</sup>H-NMR (R)-S2b

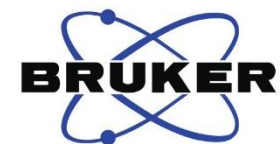

Current Data Parameters  
 NAME Jun02-2020  
 EXPNO 41  
 PROCNO 1

F2 - Acquisition Parameters  
 Date\_ 20200602  
 Time 21.37  
 INSTRUM spect  
 PROBHD 5 mm PABBO BB-  
 PULPROG zgpg30  
 TD 65536  
 SOLVENT CDCl3  
 NS 1024  
 DS 4  
 SWH 32894.738 Hz  
 FIDRES 0.501934 Hz  
 AQ 0.9961472 sec  
 RG 2580  
 DW 15.200 usec  
 DE 10.00 usec  
 TE 296.0 K  
 D1 2.00000000 sec  
 D11 0.03000000 sec  
 TD0 1

===== CHANNEL f1 =====  
 NUC1 13C  
 P1 10.20 usec  
 PL1 1.50 dB  
 PL1W 51.74793243 W  
 SFO1 125.7761482 MHz

===== CHANNEL f2 =====  
 CPDPRG[2] waltz16  
 NUC2 1H  
 PCPD2 100.00 usec  
 PL2 1.00 dB  
 PL12 19.99 dB  
 PL13 21.00 dB  
 PL2W 19.75309753 W  
 PL12W 0.24925002 W  
 PL13W 0.19753097 W  
 SFO2 500.1550006 MHz

F2 - Processing parameters  
 SI 32768  
 SF 125.7635720 MHz  
 WDW EM  
 SSB 0  
 LB 1.00 Hz  
 GB 0  
 PC 1.40

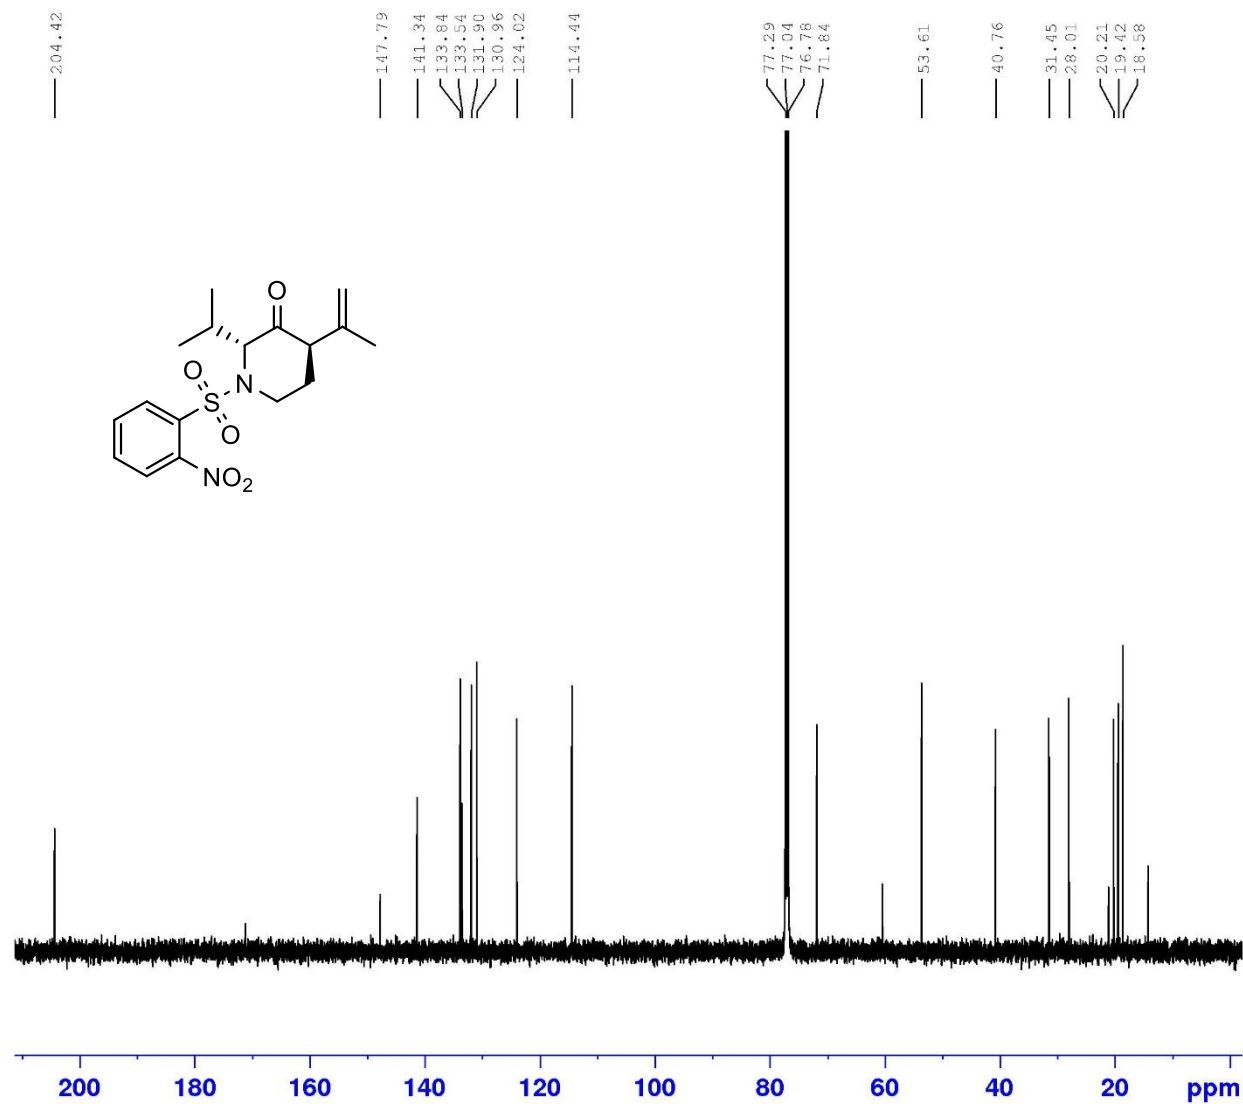

<sup>13</sup>C-NMR (R)-S2b

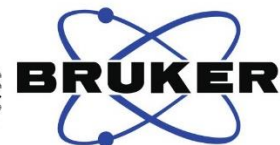

Current Data Parameters  
 NAME Apr06-2020  
 EXPNO 100  
 PROCNO 1

F2 - Acquisition Parameters  
 Date\_ 20200407  
 Time 2.28  
 INSTRUM spect  
 PROBHD 5 mm PABBO BB-  
 PULPROG zg30  
 TD 32768  
 SOLVENT CDCl3  
 NS 32  
 DS 0  
 SWH 10330.578 Hz  
 FIDRES 0.315264 Hz  
 AQ 1.5859712 sec  
 RG 181  
 DW 48.400 usec  
 DE 10.00 usec  
 TE 296.0 K  
 D1 2.00000000 sec  
 TDO 1

===== CHANNEL f1 =====  
 NUC1 1H  
 P1 11.23 usec  
 PL1 1.00 dB  
 PL1W 19.75309753 W  
 SFO1 500.1560886 MHz

F2 - Processing parameters  
 SI 16384  
 SF 500.1530122 MHz  
 WDW EM  
 SSB 0  
 LB 0.30 Hz  
 GB 0  
 PC 1.00

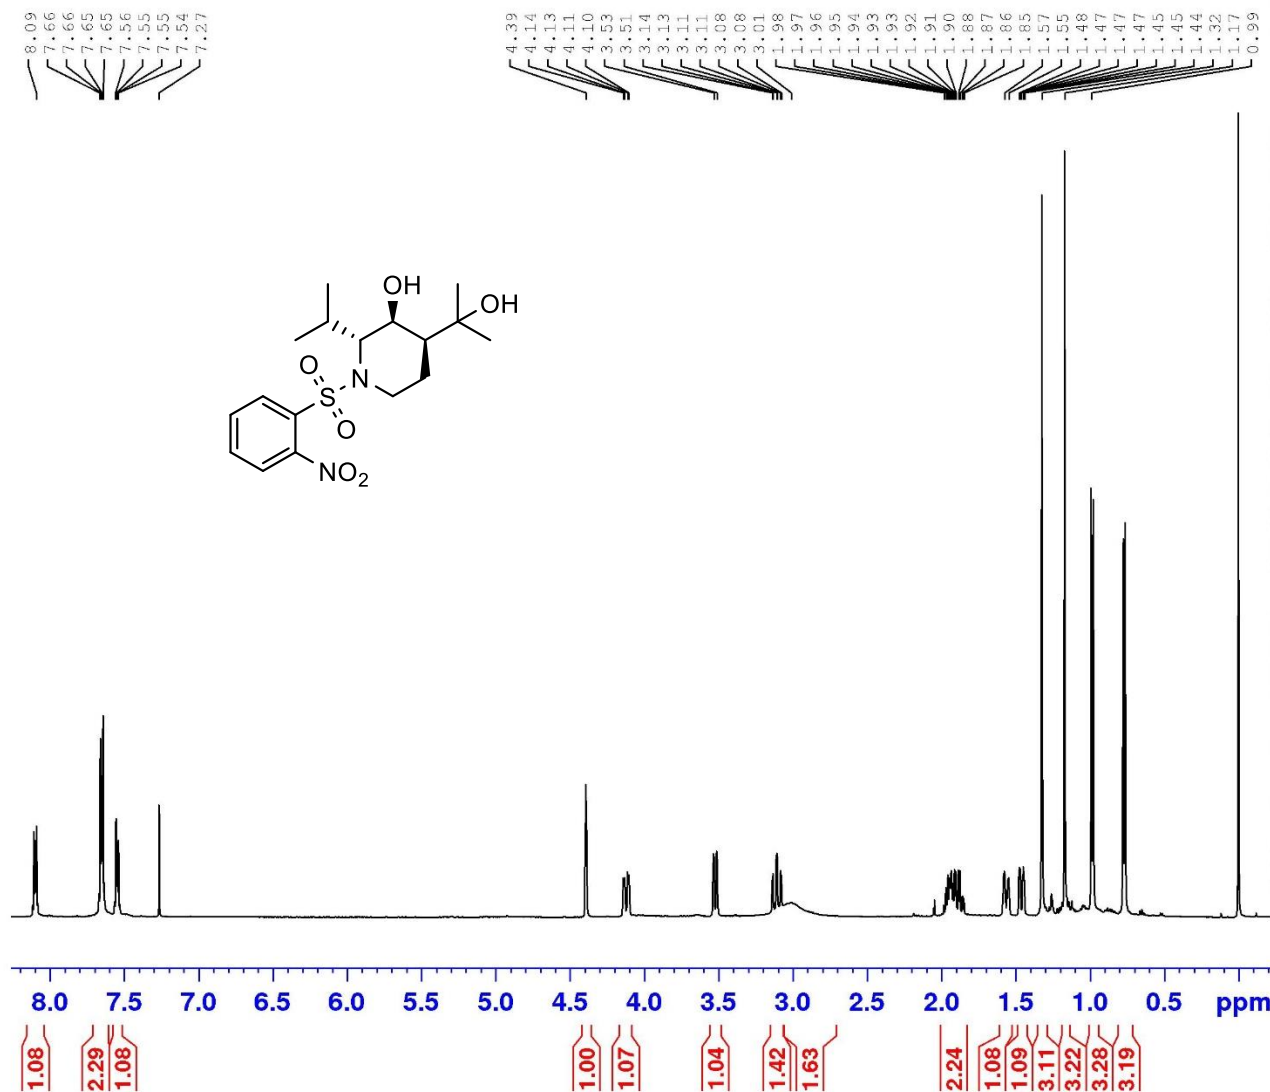

<sup>1</sup>H-NMR (S,S)-33b

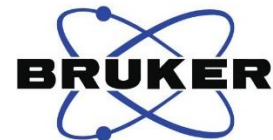

Current Data Parameters  
 NAME Apr06-2020  
 EXPNO 101  
 PROCNO 1

F2 - Acquisition Parameters  
 Date\_ 20200407  
 Time 3.21  
 INSTRUM spect  
 PROBHD 5 mm PABBO BB-  
 PULPROG zgpg30  
 TD 65536  
 SOLVENT CDCl3  
 NS 1024  
 DS 4  
 SWH 32894.738 Hz  
 FIDRES 0.501934 Hz  
 AQ 0.9961472 sec  
 RG 2580  
 DW 15.200 usec  
 DE 10.00 usec  
 TE 296.0 K  
 D1 2.00000000 sec  
 D11 0.03000000 sec  
 TD0 1

===== CHANNEL f1 =====  
 NUC1 13C  
 P1 10.20 usec  
 PL1 1.50 dB  
 PL1W 51.74793243 W  
 SFO1 125.7761482 MHz

===== CHANNEL f2 =====  
 CPDPRG[2] waltz16  
 NUC2 1H  
 PCPD2 100.00 usec  
 PL2 1.00 dB  
 PL12 19.99 dB  
 PL13 21.00 dB  
 PL2W 19.75309753 W  
 PL12W 0.24925002 W  
 PL13W 0.19753097 W  
 SFO2 500.1550006 MHz

F2 - Processing parameters  
 SI 32768  
 SF 125.7635742 MHz  
 WDW EM  
 SSB 0  
 LB 1.00 Hz  
 GB 0  
 PC 1.40

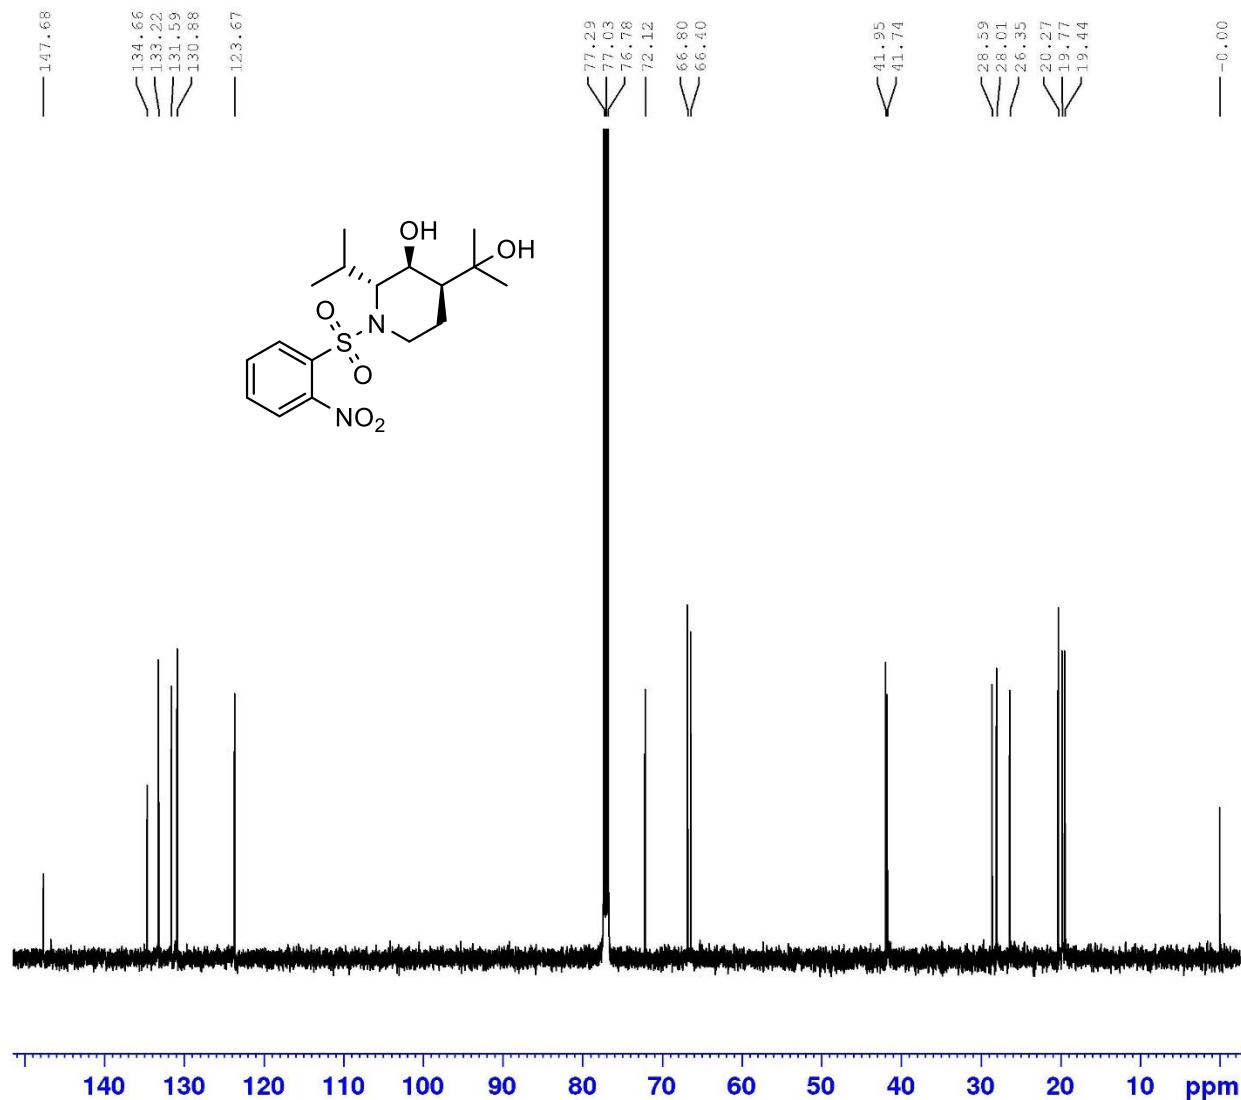

<sup>13</sup>C-NMR (S,S)-33b

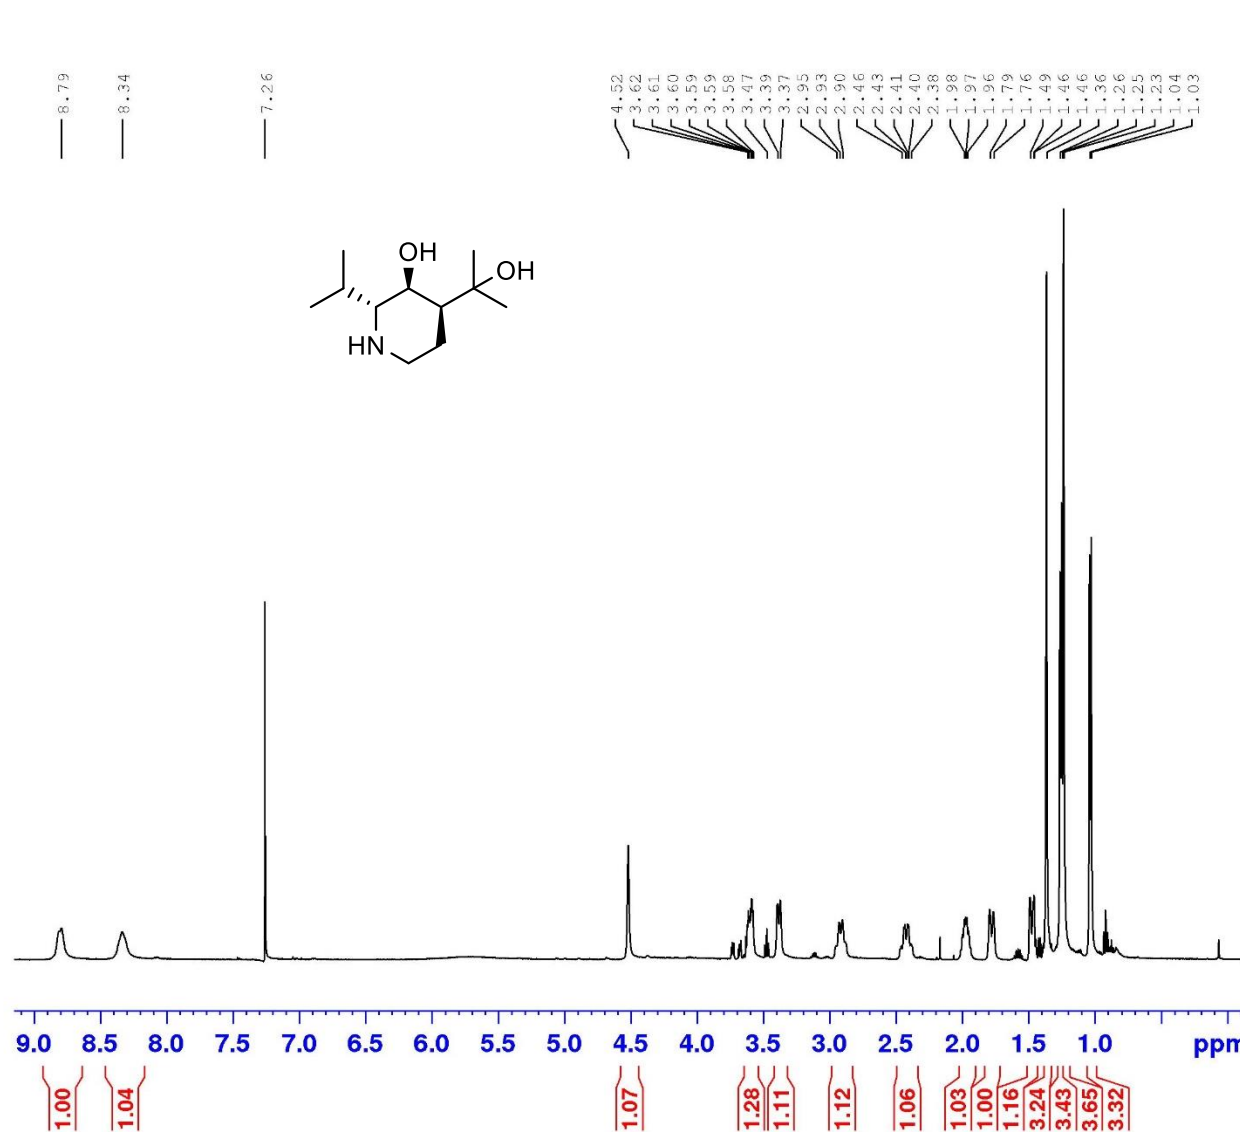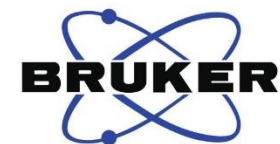

Current Data Parameters  
 NAME Mar03-2021  
 EXPNO 40  
 PROCNO 1

F2 - Acquisition Parameters  
 Date\_ 20210303  
 Time 10.43  
 INSTRUM spect  
 PROBHD 5 mm PABBO BB-  
 PULPROG zg30  
 TD 32768  
 SOLVENT CDCl3  
 NS 32  
 DS 0  
 SWH 10330.578 Hz  
 FIDRES 0.315264 Hz  
 AQ 1.5859712 sec  
 RG 322  
 DW 48.400 usec  
 DE 10.00 usec  
 TE 296.0 K  
 D1 2.00000000 sec  
 TD0 1

===== CHANNEL f1 =====  
 NUC1 1H  
 P1 11.23 usec  
 PL1 1.00 dB  
 PL1W 19.75309753 W  
 SFO1 500.1560886 MHz

F2 - Processing parameters  
 SI 16384  
 SF 500.1530158 MHz  
 WDW EM  
 SSB 0  
 LB 0.30 Hz  
 GB 0  
 PC 1.00

<sup>1</sup>H-NMR (S,S)-33b

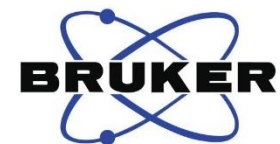

Current Data Parameters  
 NAME Mar03-2021  
 EXPNO 41  
 PROCNO 1

F2 - Acquisition Parameters  
 Date\_ 20210303  
 Time 11.37  
 INSTRUM spect  
 PROBHD 5 mm PABBO BB-  
 PULPROG zgpg30  
 TD 65536  
 SOLVENT CDCl3  
 NS 1024  
 DS 4  
 SWH 32894.738 Hz  
 FIDRES 0.501934 Hz  
 AQ 0.9961472 sec  
 RG 2580  
 DW 15.200 usec  
 DE 10.00 usec  
 TE 296.0 K  
 D1 2.00000000 sec  
 D11 0.03000000 sec  
 TDO 1

===== CHANNEL f1 =====  
 NUC1 13C  
 P1 10.20 usec  
 PL1 1.50 dB  
 PL1W 51.74793243 W  
 SFO1 125.7761482 MHz

===== CHANNEL f2 =====  
 CPDPRG[2] waltz16  
 NUC2 1H  
 PCPD2 100.00 usec  
 PL2 1.00 dB  
 PL12 19.99 dB  
 PL13 21.00 dB  
 PL2W 19.75309753 W  
 PL12W 0.24925002 W  
 PL13W 0.19753097 W  
 SFO2 500.1550006 MHz

F2 - Processing parameters  
 SI 32768  
 SF 125.7635720 MHz  
 WDW EM  
 SSB 0  
 LB 1.00 Hz  
 GB 0  
 PC 1.40

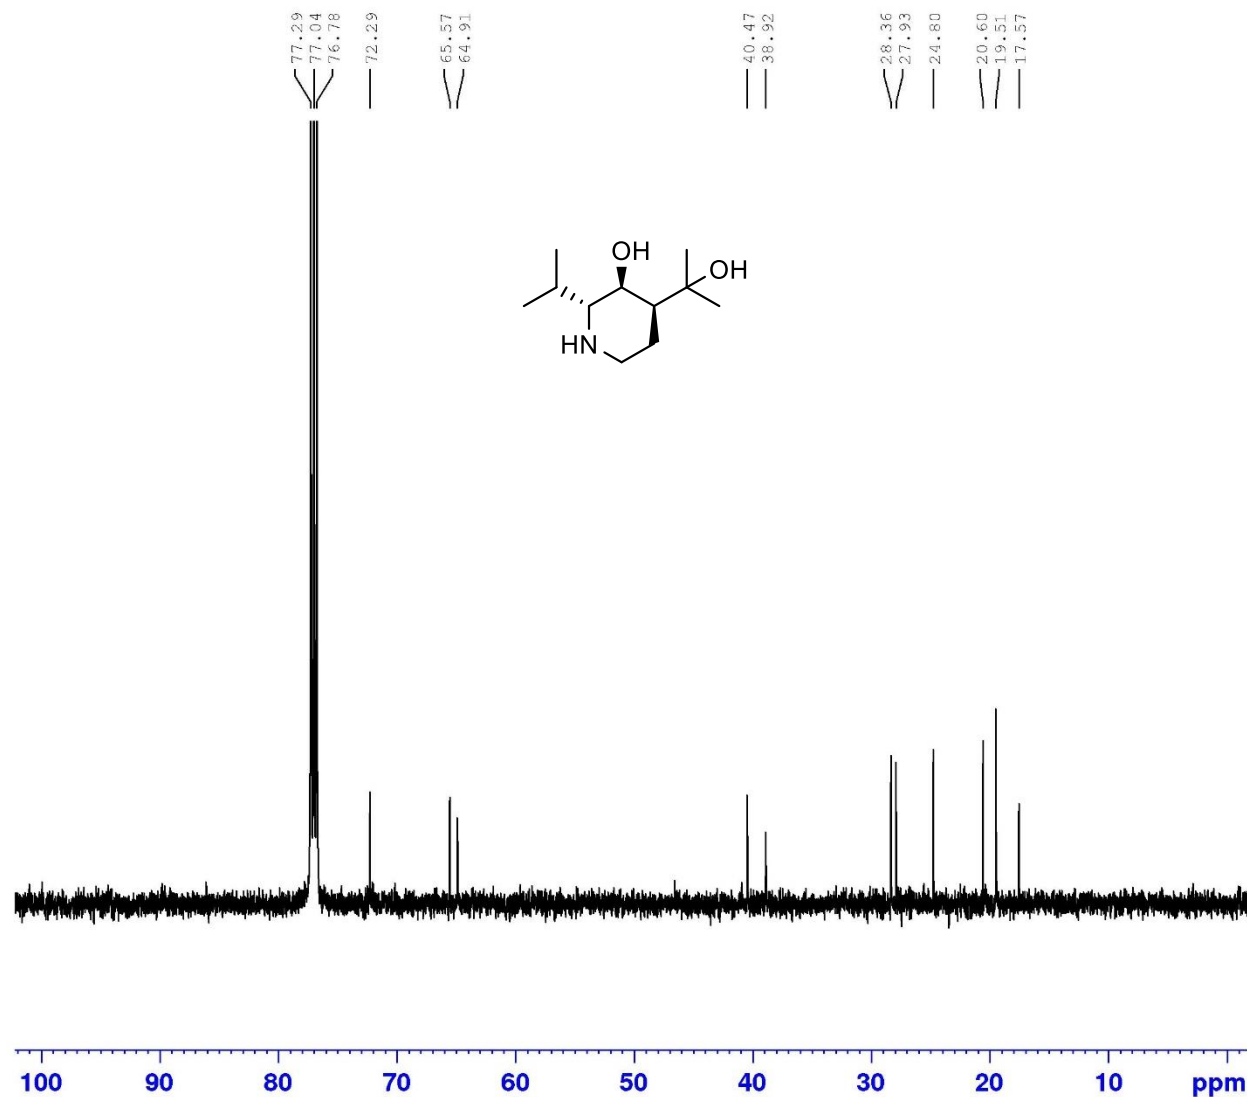

<sup>13</sup>C-NMR (S,S)-33b

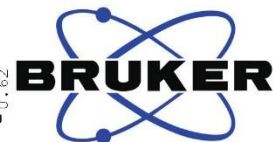

Current Data Parameters  
 NAME Oct30-2020  
 EXPNO 50  
 PROCNO 1

F2 - Acquisition Parameters  
 Date\_ 20201030  
 Time 20.38  
 INSTRUM spect  
 PROBHD 5 mm PABBO BB-  
 PULPROG zg30  
 TD 32768  
 SOLVENT CDCl3  
 NS 64  
 DS 0  
 SWH 10330.578 Hz  
 FIDRES 0.315264 Hz  
 AQ 1.5859712 sec  
 RG 144  
 DW 48.400 usec  
 DE 10.00 usec  
 TE 296.0 K  
 D1 2.00000000 sec  
 TD0 1

===== CHANNEL f1 =====  
 NUC1 1H  
 P1 11.23 usec  
 PL1 1.00 dB  
 PL1W 19.75309753 W  
 SFO1 500.1560886 MHz

F2 - Processing parameters  
 SI 16384  
 SF 500.1530162 MHz  
 WDW EM  
 SSB 0  
 LB 0.30 Hz  
 GB 0  
 PC 1.00

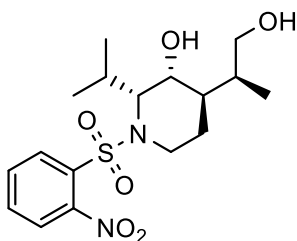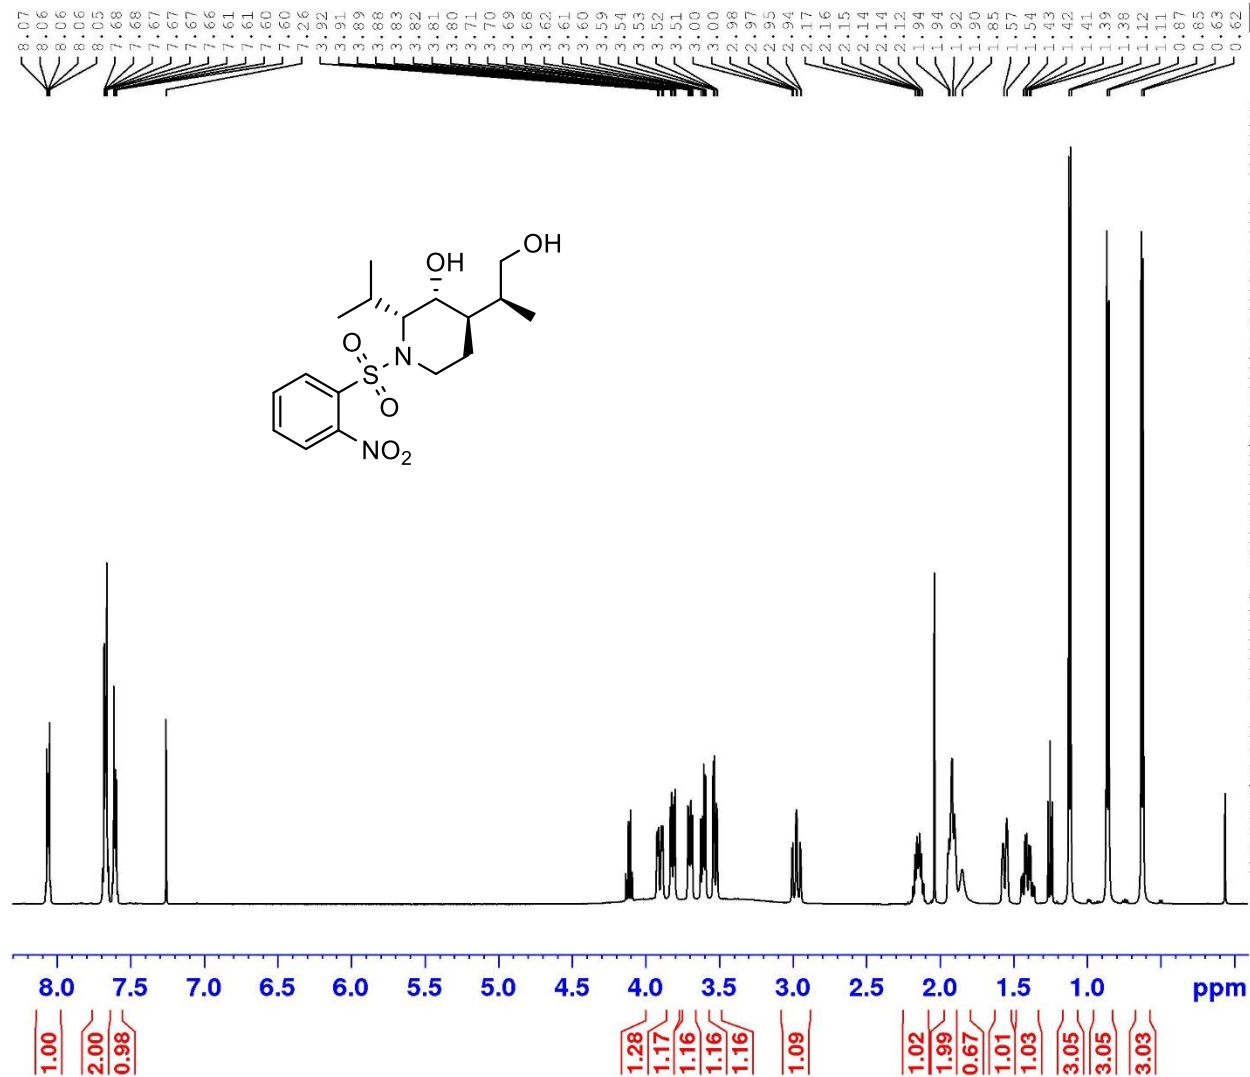

<sup>1</sup>H-NMR (*R,R,S*)-34b

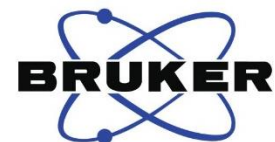

Current Data Parameters  
 NAME Oct30-2020  
 EXPNO 51  
 PROCNO 1

F2 - Acquisition Parameters  
 Date\_ 20201030  
 Time 22.24  
 INSTRUM spect  
 PROBHD 5 mm PABBO BB-  
 PULPROG zgpg30  
 TD 65536  
 SOLVENT CDCl3  
 NS 2048  
 DS 4  
 SWH 32894.738 Hz  
 FIDRES 0.501934 Hz  
 AQ 0.9961472 sec  
 RG 2580  
 DW 15.200 usec  
 DE 10.00 usec  
 TE 296.0 K  
 D1 2.00000000 sec  
 D11 0.03000000 sec  
 TD0 1

===== CHANNEL f1 =====  
 NUC1 13C  
 P1 10.20 usec  
 PL1 1.50 dB  
 PL1W 51.74793243 W  
 SFO1 125.7761482 MHz

===== CHANNEL f2 =====  
 CPDPRG[2] waltz16  
 NUC2 1H  
 PCPD2 100.00 usec  
 PL2 1.00 dB  
 PL12 19.99 dB  
 PL13 21.00 dB  
 PL2W 19.75309753 W  
 PL12W 0.24925002 W  
 PL13W 0.19753097 W  
 SFO2 500.1550006 MHz

F2 - Processing parameters  
 SI 32768  
 SF 125.7635720 MHz  
 WDW EM  
 SSB 0  
 LB 1.00 Hz  
 GB 0  
 PC 1.40

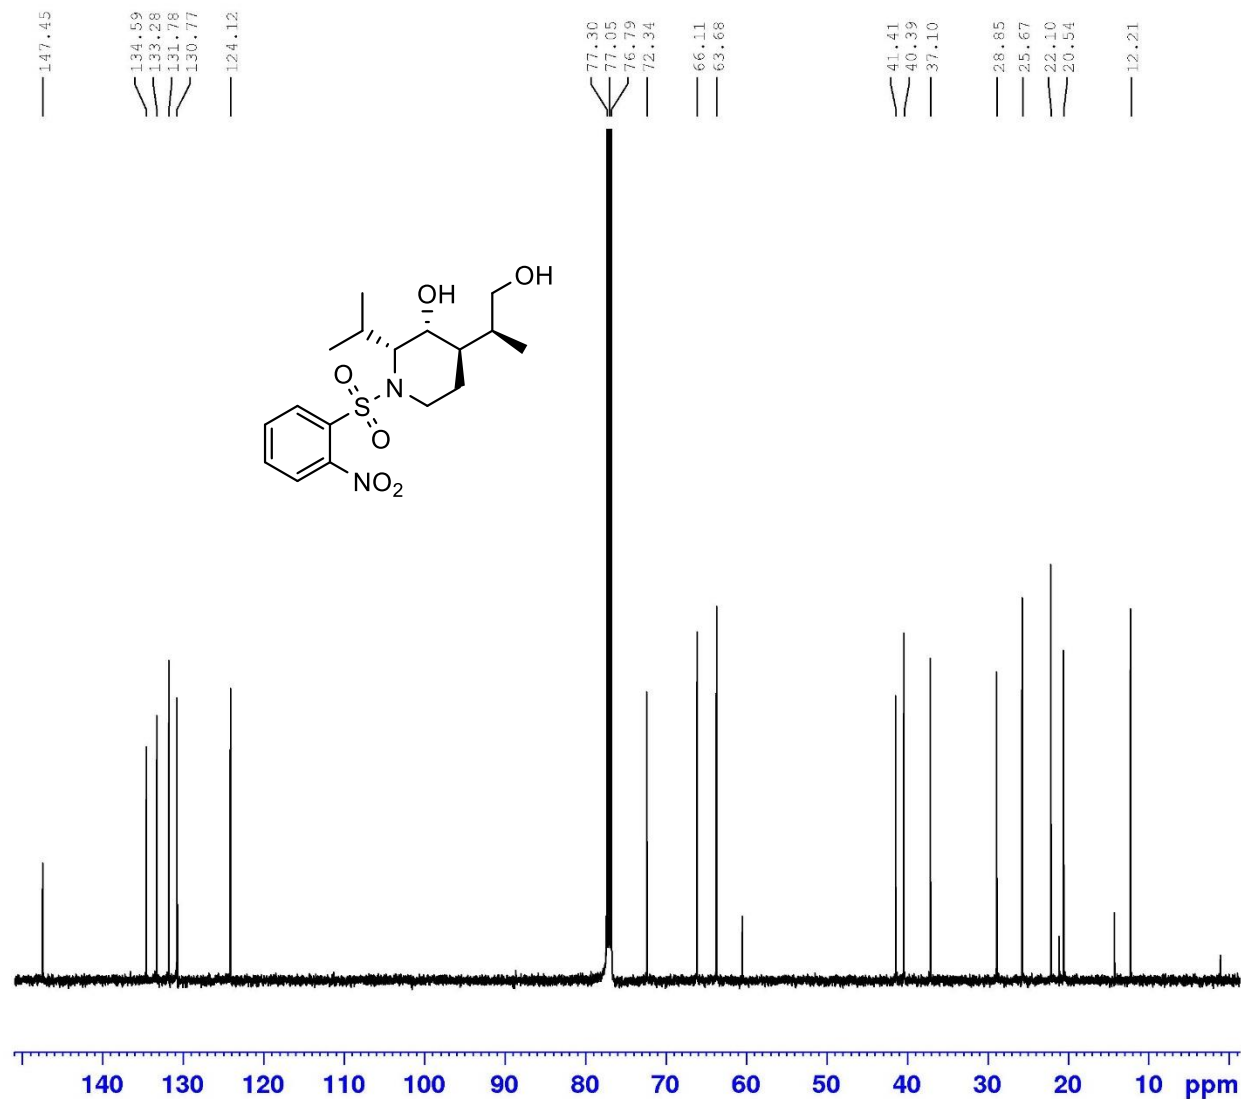

<sup>13</sup>C-NMR (R,R,S)-34b

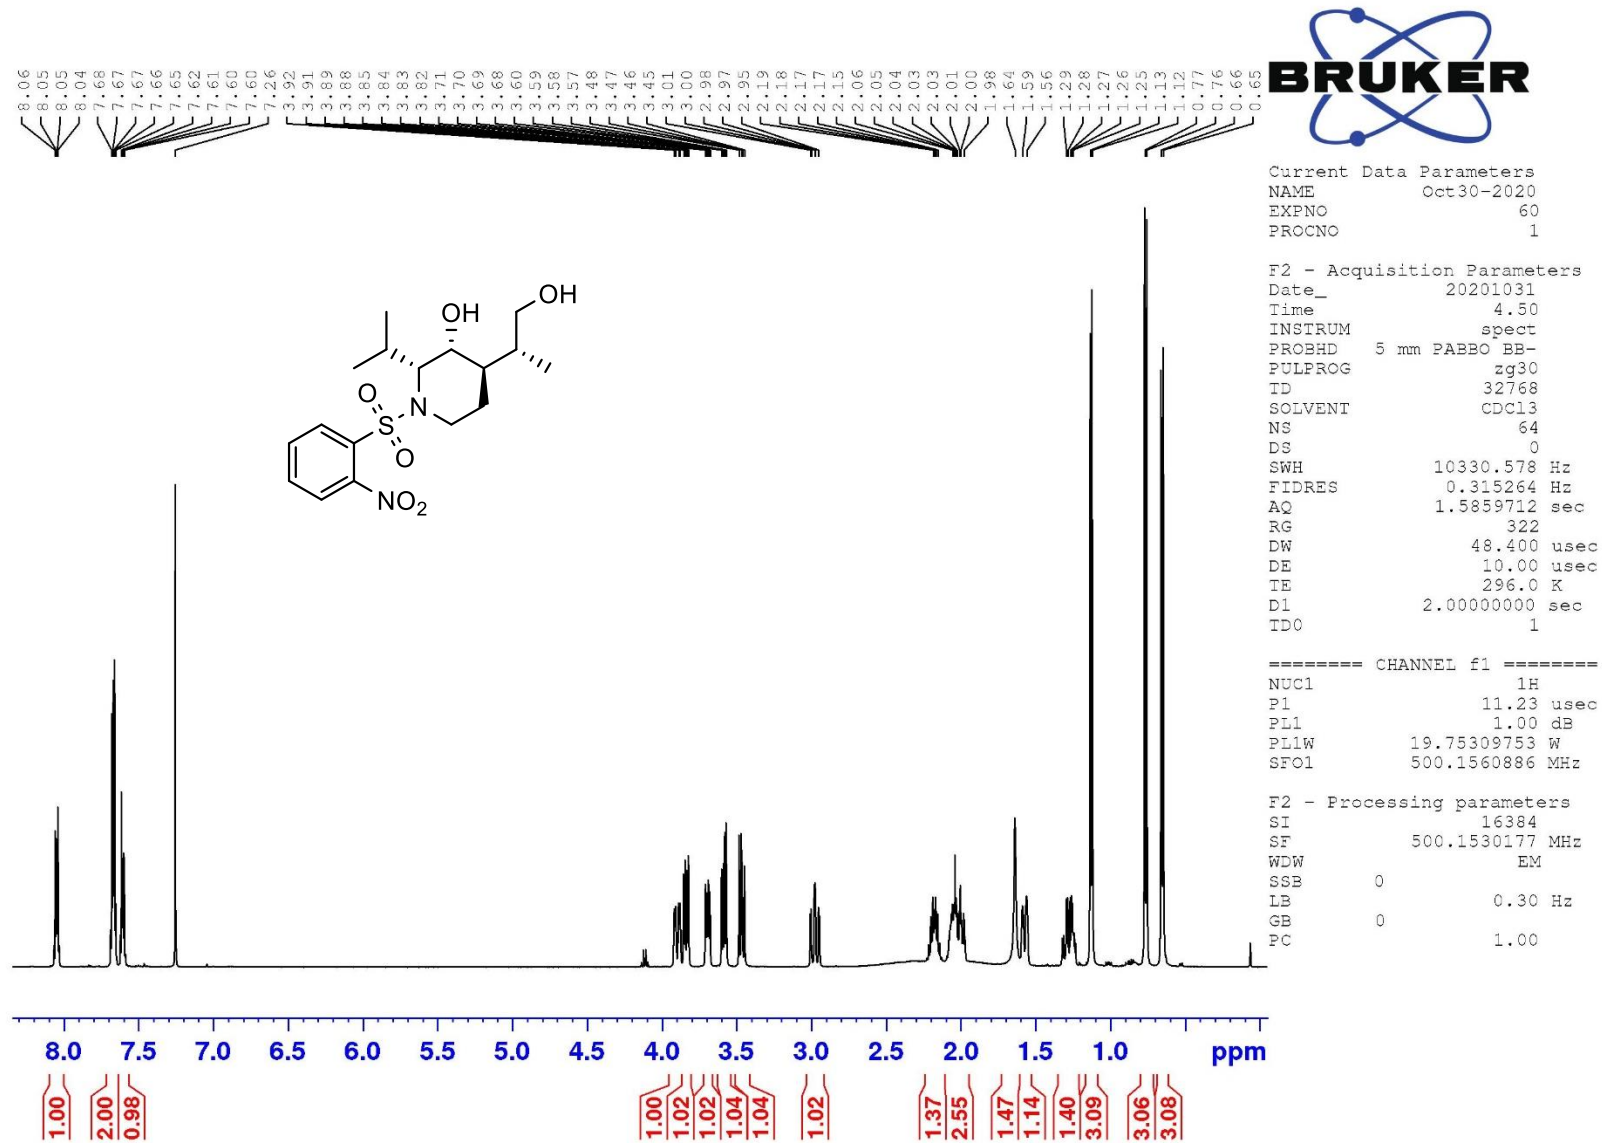

<sup>1</sup>H-NMR (*R,R,R*)-34b

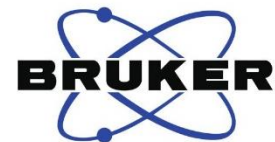

Current Data Parameters  
 NAME Oct30-2020  
 EXPNO 61  
 PROCNO 1

F2 - Acquisition Parameters  
 Date\_ 20201031  
 Time 6.35  
 INSTRUM spect  
 PROBHD 5 mm PABBO BB-  
 PULPROG zgpg30  
 TD 65536  
 SOLVENT CDCl3  
 NS 2048  
 DS 4  
 SWH 32894.738 Hz  
 FIDRES 0.501934 Hz  
 AQ 0.9961472 sec  
 RG 2580  
 DW 15.200 usec  
 DE 10.00 usec  
 TE 296.0 K  
 D1 2.00000000 sec  
 D11 0.03000000 sec  
 TD0 1

===== CHANNEL f1 =====  
 NUC1 13C  
 P1 10.20 usec  
 PL1 1.50 dB  
 PL1W 51.74793243 W  
 SFO1 125.7761482 MHz

===== CHANNEL f2 =====  
 CPDPRG[2] waltz16  
 NUC2 1H  
 PCPD2 100.00 usec  
 PL2 1.00 dB  
 PL12 19.99 dB  
 PL13 21.00 dB  
 PL2W 19.75309753 W  
 PL12W 0.24925002 W  
 PL13W 0.19753097 W  
 SFO2 500.1550006 MHz

F2 - Processing parameters  
 SI 32768  
 SF 125.7635720 MHz  
 WDW EM  
 SSB 0  
 LB 1.00 Hz  
 GB 0  
 PC 1.40

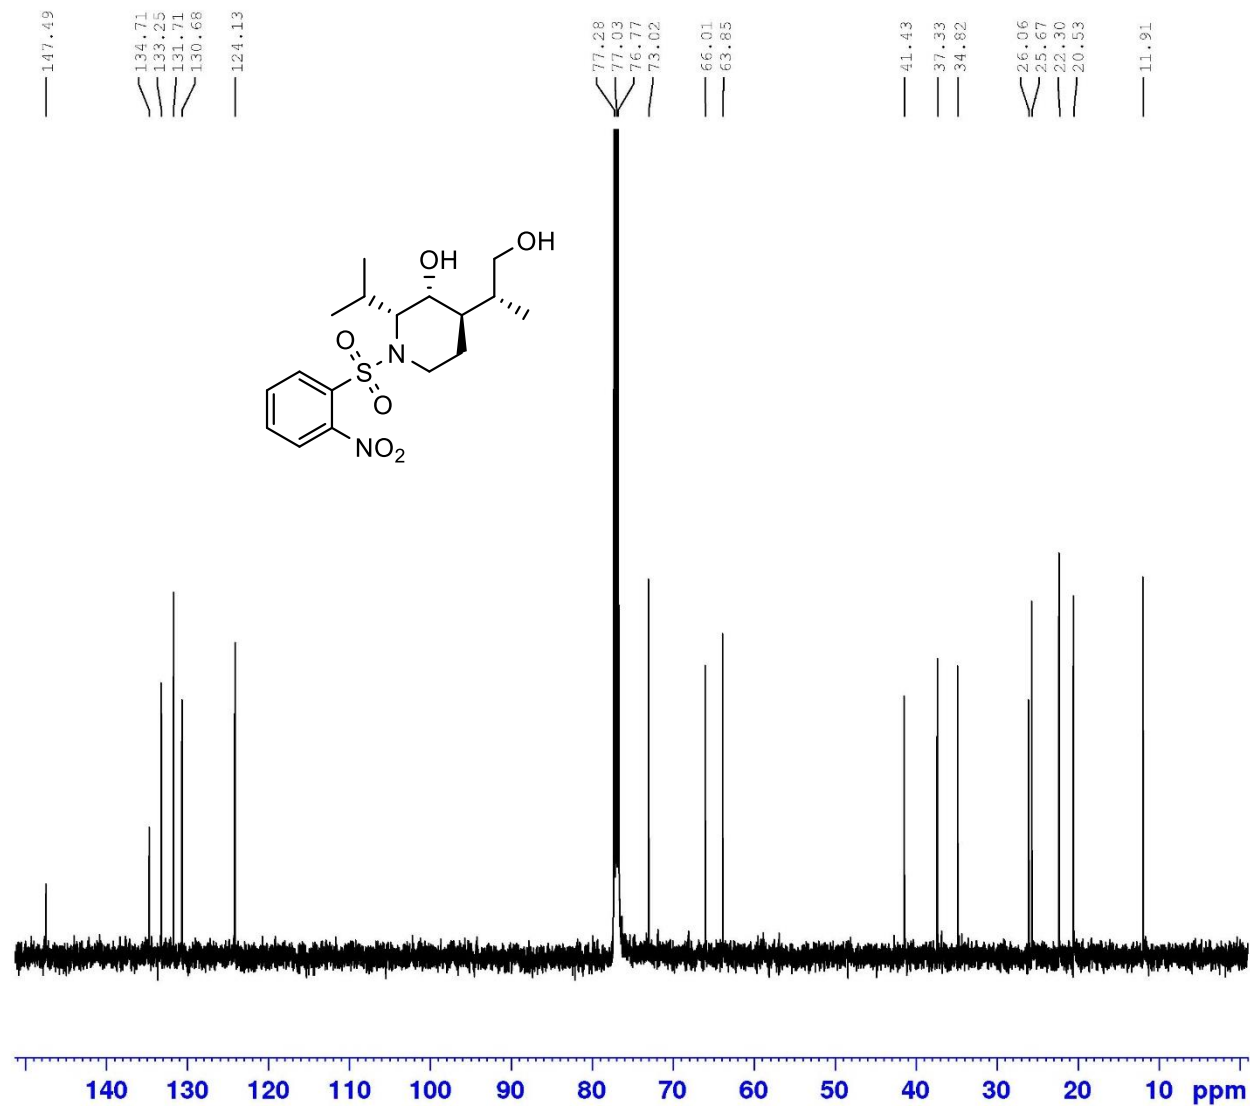

<sup>13</sup>C-NMR (*R,R,R*)-34b

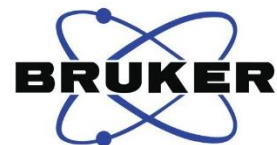

Current Data Parameters  
 NAME Nov06-2020  
 EXPNO 130  
 PROCNO 1

F2 - Acquisition Parameters  
 Date\_ 20201107  
 Time 2.23  
 INSTRUM spect  
 PROBHD 5 mm PABBO BB-  
 PULPROG zg30  
 TD 32768  
 SOLVENT CDCl3  
 NS 64  
 DS 0  
 SWH 10330.578 Hz  
 FIDRES 0.315264 Hz  
 AQ 1.5859712 sec  
 RG 161  
 DW 48.400 usec  
 DE 10.00 usec  
 TE 296.1 K  
 D1 2.00000000 sec  
 TD0 1

===== CHANNEL f1 =====  
 NUC1 1H  
 P1 11.23 usec  
 PL1 1.00 dB  
 PL1W 19.75309753 W  
 SFO1 500.1560886 MHz

F2 - Processing parameters  
 SI 16384  
 SF 500.1530157 MHz  
 WDW EM  
 SSB 0  
 LB 0.30 Hz  
 GB 0  
 PC 1.00

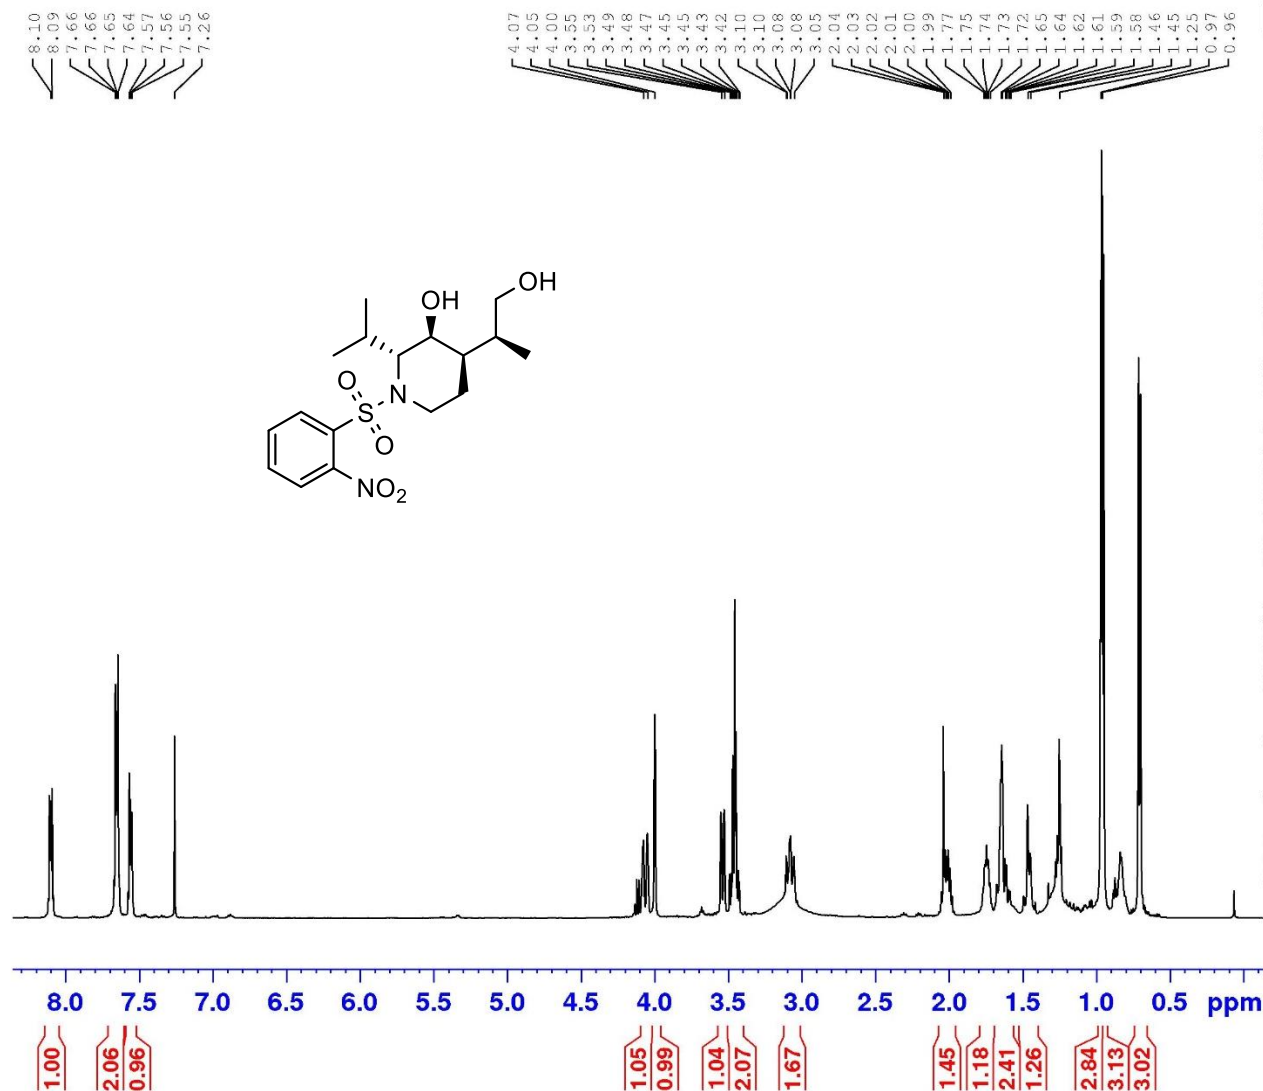

<sup>1</sup>H-NMR (S,R,S)-34b

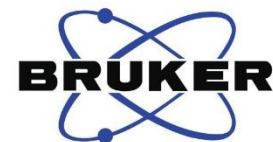

Current Data Parameters  
 NAME Nov06-2020  
 EXPNO 131  
 PROCNO 1

F2 - Acquisition Parameters  
 Date\_ 20201107  
 Time 4.10  
 INSTRUM spect  
 PROBHD 5 mm PABBO BB-  
 PULPROG zgpg30  
 TD 65536  
 SOLVENT CDCl3  
 NS 2048  
 DS 4  
 SWH 32894.738 Hz  
 FIDRES 0.501934 Hz  
 AQ 0.9961472 sec  
 RG 2580  
 DW 15.200 usec  
 DE 10.00 usec  
 TE 297.0 K  
 D1 2.00000000 sec  
 D11 0.03000000 sec  
 TD0 1

===== CHANNEL f1 =====  
 NUC1 13C  
 P1 10.20 usec  
 PL1 1.50 dB  
 PL1W 51.74793243 W  
 SFO1 125.7761482 MHz

===== CHANNEL f2 =====  
 CPDPRG[2] waltz16  
 NUC2 1H  
 PCPD2 100.00 usec  
 PL2 1.00 dB  
 PL12 19.99 dB  
 PL13 21.00 dB  
 PL2W 19.75309753 W  
 PL12W 0.24925002 W  
 PL13W 0.19753097 W  
 SFO2 500.1550006 MHz

F2 - Processing parameters  
 SI 32768  
 SF 125.7635720 MHz  
 WDW EM  
 SSB 0  
 LB 1.00 Hz  
 GB 0  
 PC 1.40

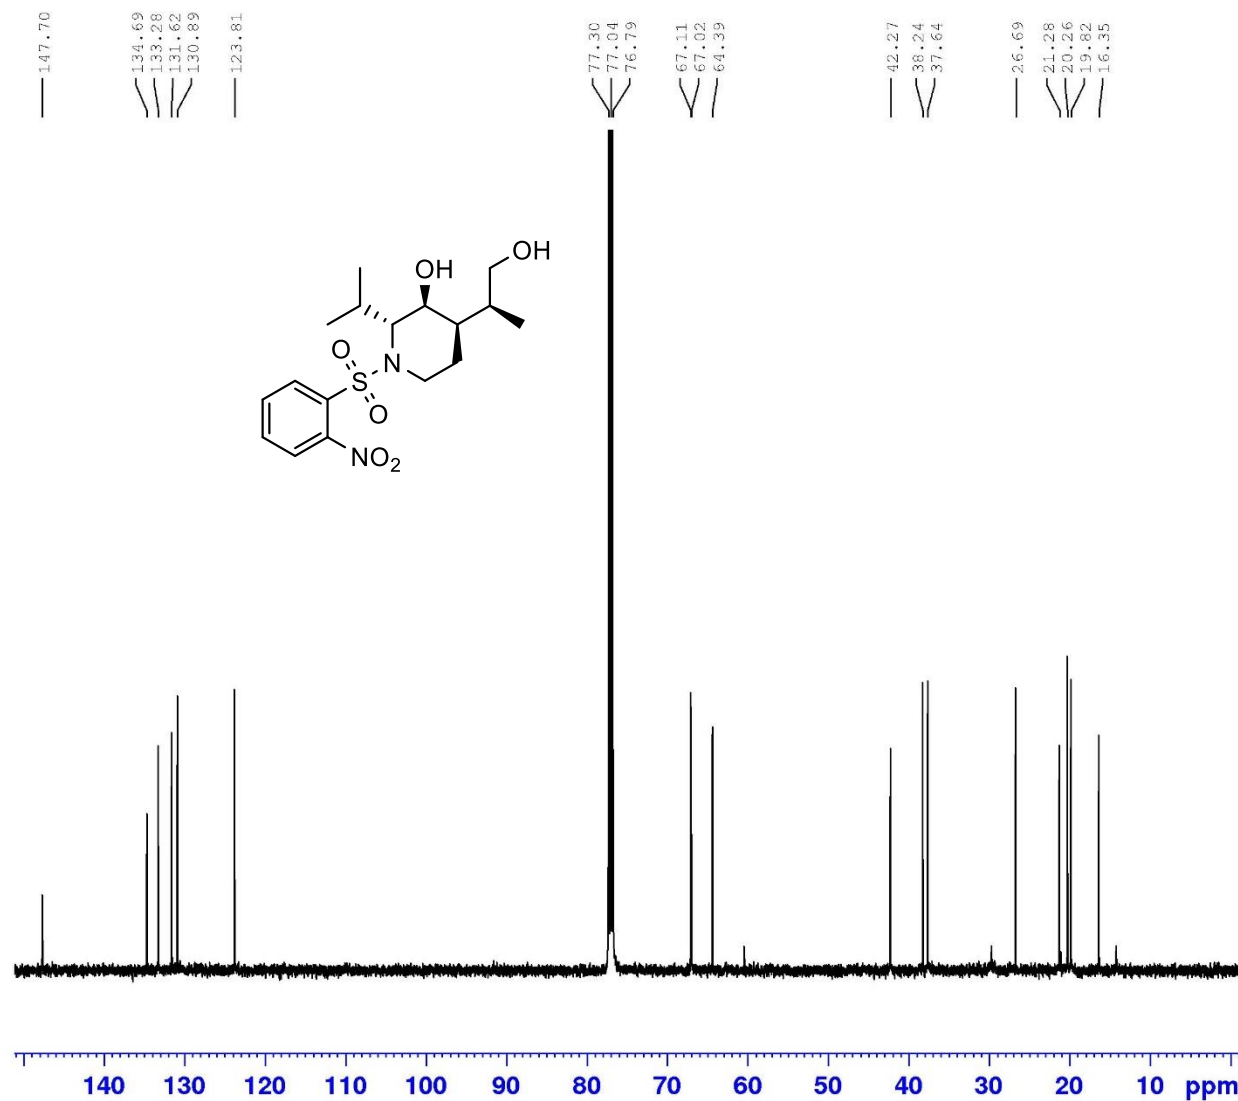

<sup>13</sup>C-NMR (S,R,S)-34b

8.10  
8.09  
7.65  
7.64  
7.63  
7.63  
7.56  
7.55  
7.54  
7.26

4.19  
4.09  
4.08  
4.06  
4.06  
4.05  
3.58  
3.56  
3.08  
3.06  
3.05  
3.03  
2.74  
2.74  
2.71  
2.70  
2.53  
2.52  
1.95  
1.93  
1.79  
1.78  
1.76  
1.75  
1.74  
1.73  
1.72  
1.70  
1.40  
1.39  
1.35  
0.98  
0.97  
0.79  
0.77

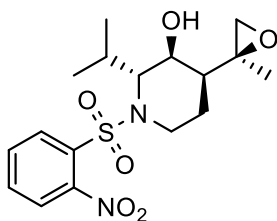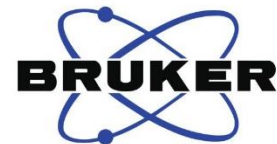

Current Data Parameters  
NAME Dec03-2020  
EXPNO 100  
PROCNO 1

F2 - Acquisition Parameters  
Date\_ 20201203  
Time 23.19  
INSTRUM spect  
PROBHD 5 mm PABBO BB-  
PULPROG zg30  
TD 32768  
SOLVENT CDCl3  
NS 32  
DS 0  
SWH 10330.578 Hz  
FIDRES 0.315264 Hz  
AQ 1.5859712 sec  
RG 322  
DW 48.400 usec  
DE 10.00 usec  
TE 296.0 K  
D1 2.00000000 sec  
TD0 1

===== CHANNEL f1 =====  
NUC1 1H  
P1 11.23 usec  
PL1 1.00 dB  
PL1W 19.75309753 W  
SFO1 500.1560886 MHz

F2 - Processing parameters  
SI 16384  
SF 500.1530171 MHz  
WDW EM  
SSB 0  
LB 0.30 Hz  
GB 0  
PC 1.00

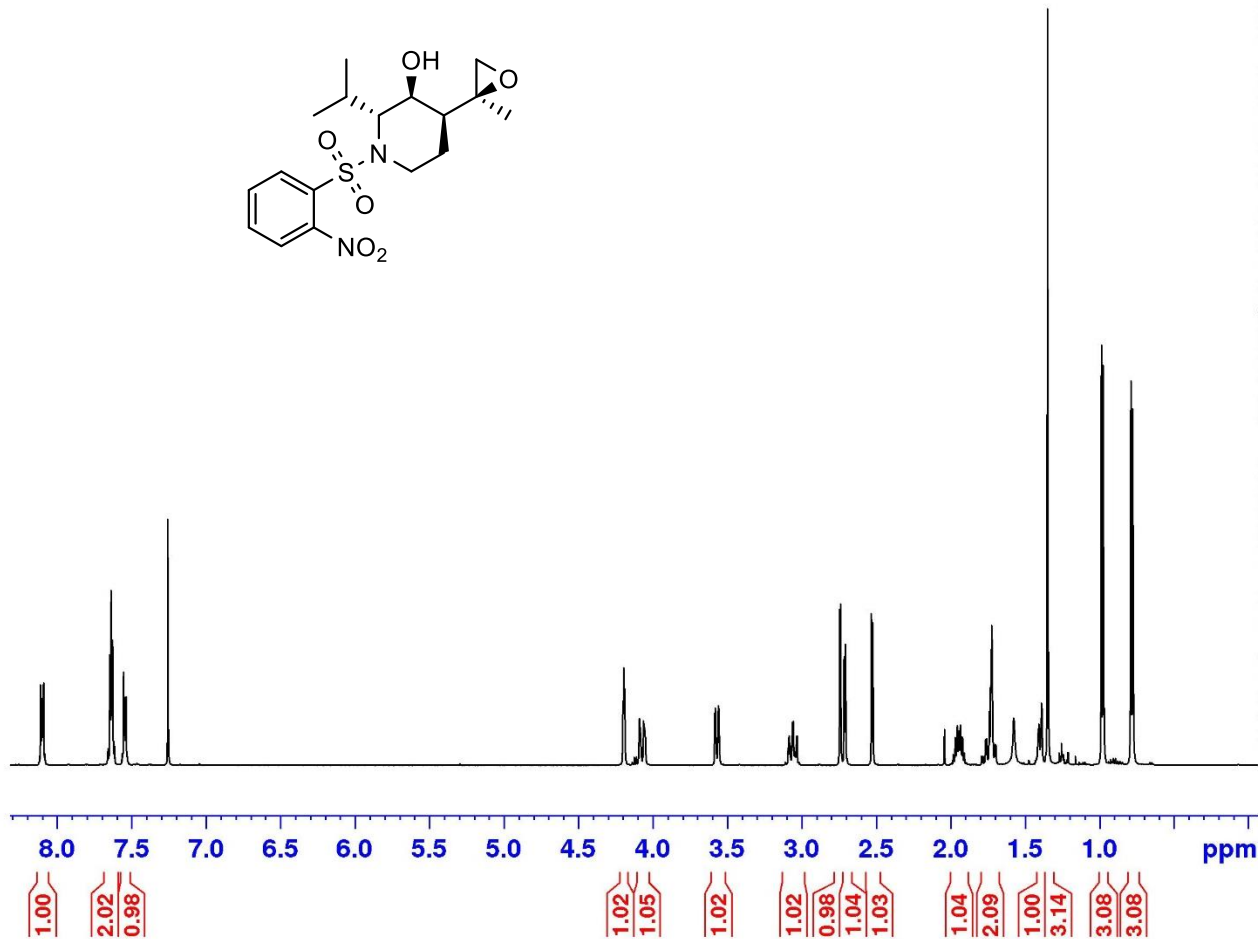

<sup>1</sup>H-NMR (S,S,S)-35b

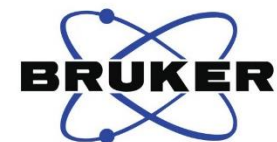

Current Data Parameters  
 NAME Dec03-2020  
 EXPNO 101  
 PROCNO 1

F2 - Acquisition Parameters  
 Date\_ 20201204  
 Time 0.12  
 INSTRUM spect  
 PROBHD 5 mm PABBO BB-  
 PULPROG zgpg30  
 TD 65536  
 SOLVENT CDC13  
 NS 1024  
 DS 4  
 SWH 32894.738 Hz  
 FIDRES 0.501934 Hz  
 AQ 0.9961472 sec  
 RG 2580  
 DW 15.200 usec  
 DE 10.00 usec  
 TE 296.0 K  
 D1 2.00000000 sec  
 D11 0.03000000 sec  
 TD0 1

===== CHANNEL f1 =====  
 NUC1 13C  
 P1 10.20 usec  
 PL1 1.50 dB  
 PL1W 51.74793243 W  
 SFO1 125.7761482 MHz

===== CHANNEL f2 =====  
 CPDPRG[2] waltz16  
 NUC2 1H  
 PCPD2 100.00 usec  
 PL2 1.00 dB  
 PL12 19.99 dB  
 PL13 21.00 dB  
 PL2W 19.75309753 W  
 PL12W 0.24925002 W  
 PL13W 0.19753097 W  
 SFO2 500.1550006 MHz

F2 - Processing parameters  
 SI 32768  
 SF 125.7635720 MHz  
 WDW EM  
 SSB 0  
 LB 1.00 Hz  
 GB 0  
 PC 1.40

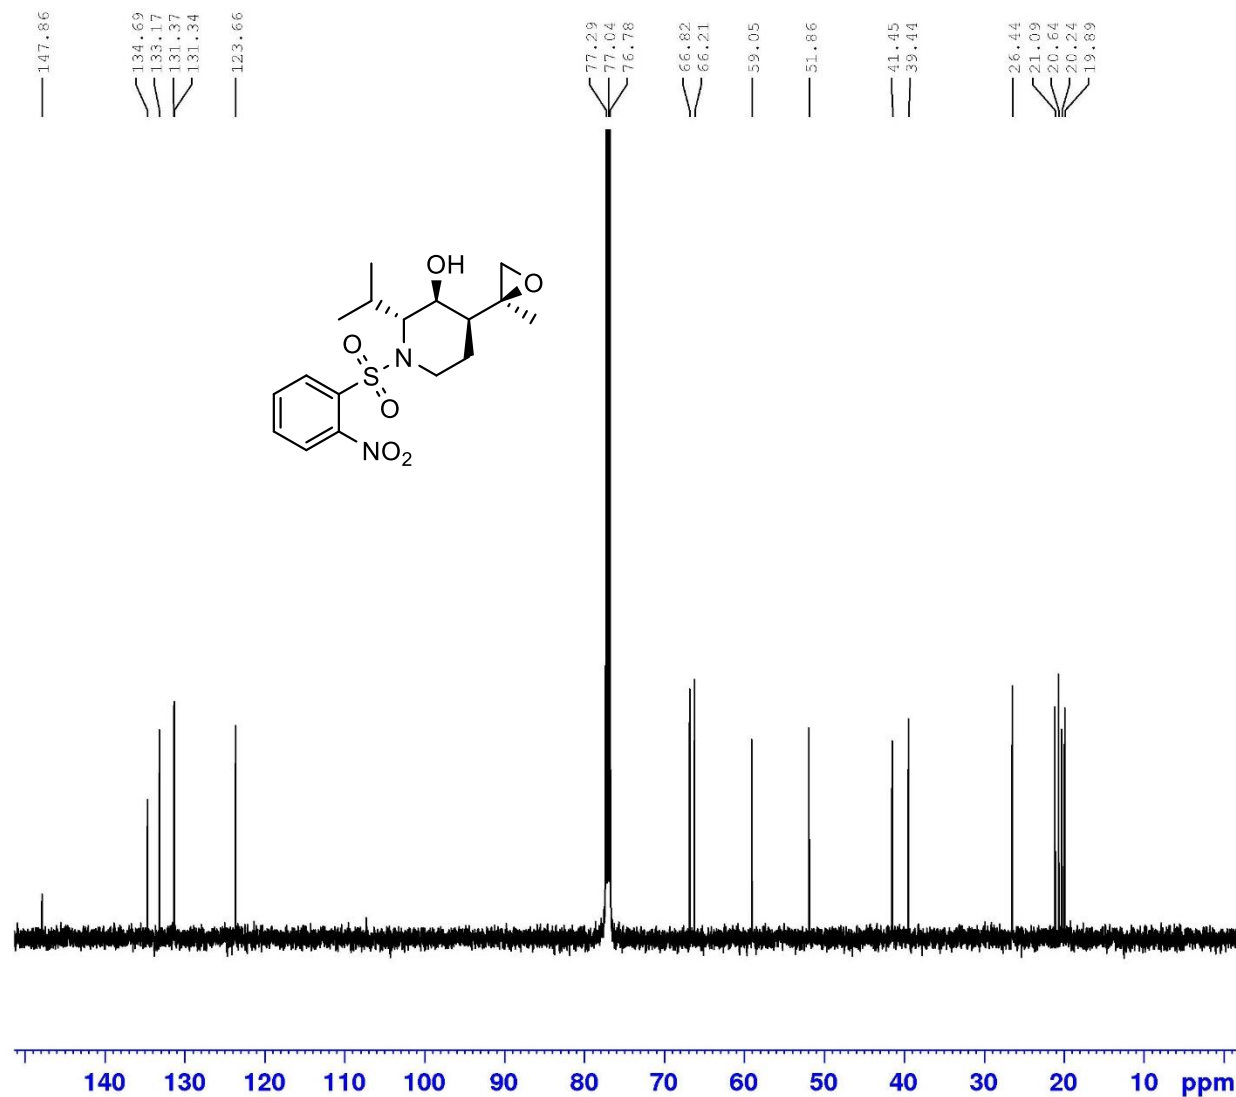

<sup>13</sup>C-NMR (S,S,S)-35b

8.10  
8.09  
7.64  
7.63  
7.63  
7.55  
7.53  
7.26

4.07  
3.56  
3.54  
3.08  
3.07  
3.05  
3.04  
3.02  
3.02  
2.85  
2.84  
2.83  
2.82  
2.57  
2.56  
1.95  
1.93  
1.91  
1.90  
1.90  
1.88  
1.88  
1.87  
1.67  
1.66  
1.65  
1.63  
1.62  
1.60  
1.59  
1.51  
1.50  
1.48  
1.34  
0.98

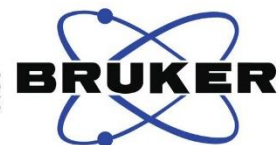

Current Data Parameters  
NAME Dec03-2020  
EXPNO 110  
PROCNO 1

F2 - Acquisition Parameters  
Date\_ 20201204  
Time 6.35  
INSTRUM spect  
PROBHD 5 mm PABBO BB-  
PULPROG zg30  
TD 32768  
SOLVENT CDCl3  
NS 32  
DS 0  
SWH 10330.578 Hz  
FIDRES 0.315264 Hz  
AQ 1.5859712 sec  
RG 161  
DW 48.400 usec  
DE 10.00 usec  
TE 296.0 K  
D1 2.00000000 sec  
TD0 1

===== CHANNEL f1 =====  
NUC1 1H  
P1 11.23 usec  
PL1 1.00 dB  
PL1W 19.75309753 W  
SFO1 500.1560886 MHz

F2 - Processing parameters  
SI 16384  
SF 500.1530164 MHz  
WDW EM  
SSB 0  
LB 0.30 Hz  
GB 0  
PC 1.00

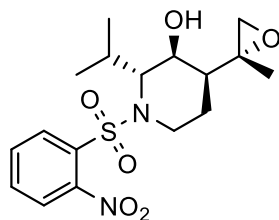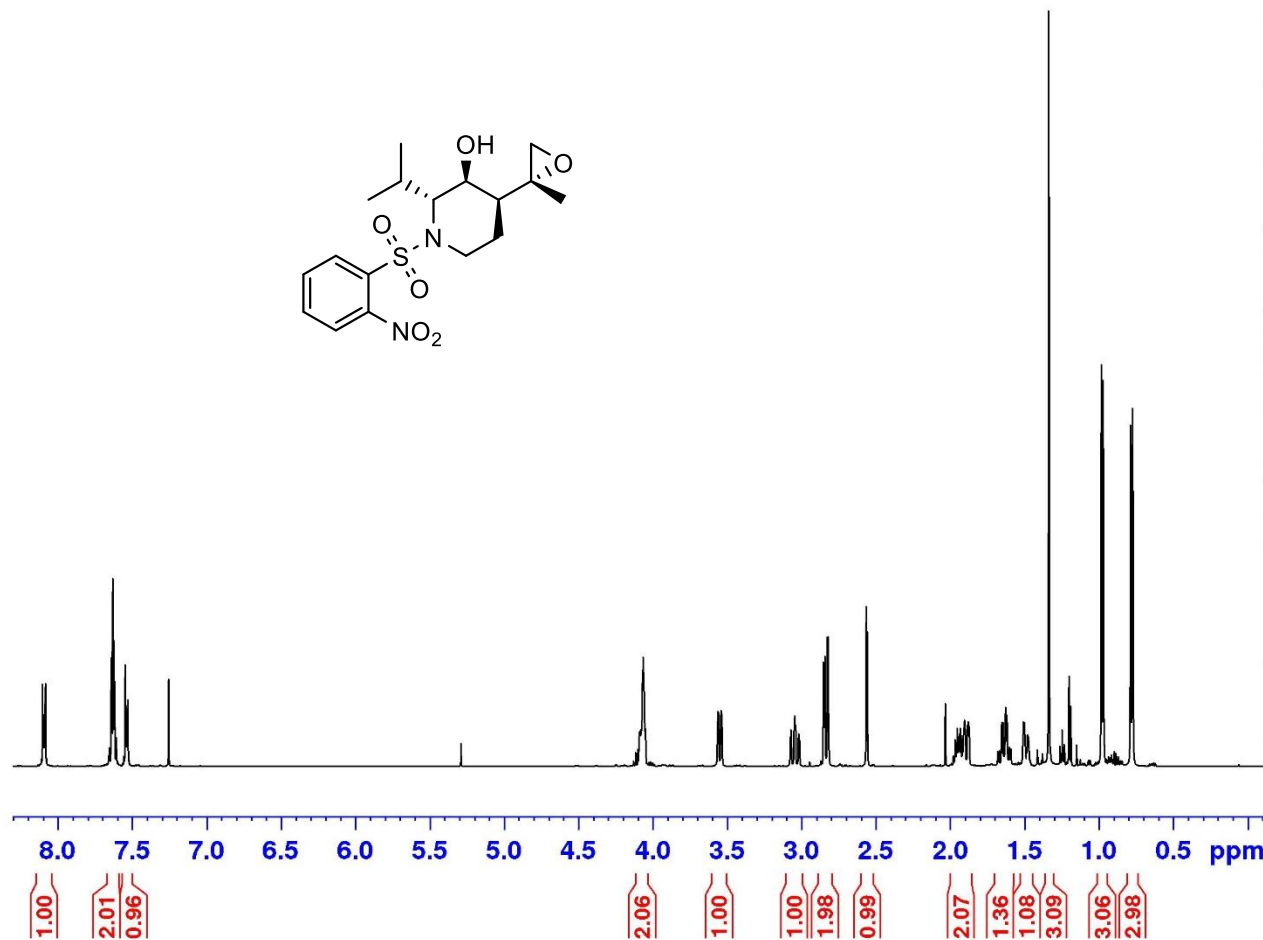

<sup>1</sup>H-NMR (S,S,R)-35b

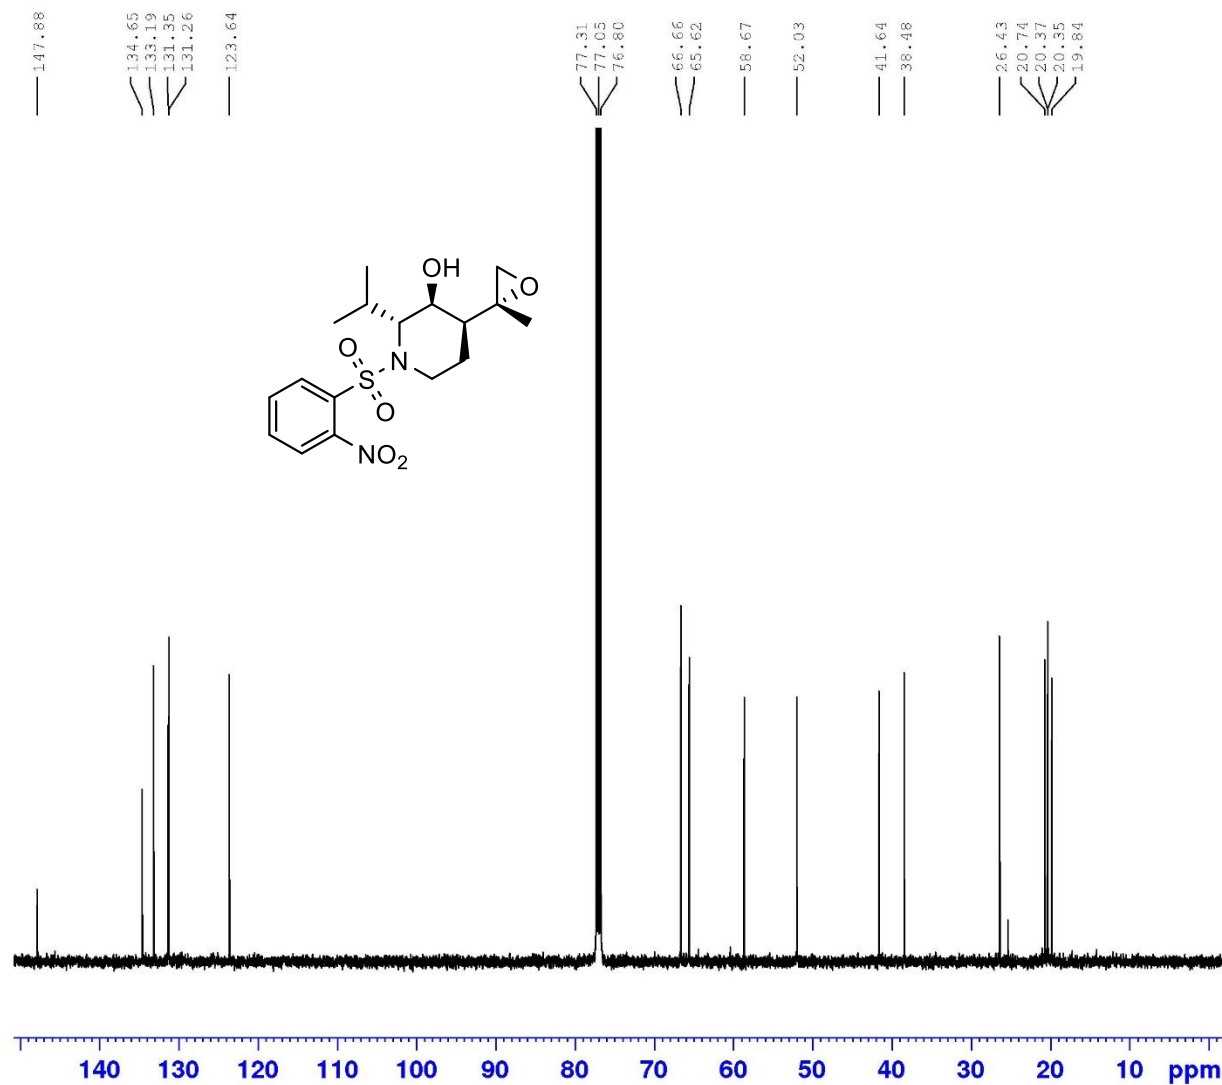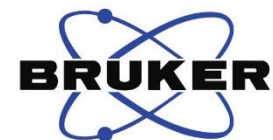

Current Data Parameters  
 NAME Dec03-2020  
 EXPNO 111  
 PROCNO 1

F2 - Acquisition Parameters  
 Date\_ 20201204  
 Time 7.28  
 INSTRUM spect  
 PROBHD 5 mm PABBO BB-  
 PULPROG zgpg30  
 TD 65536  
 SOLVENT CDCl3  
 NS 1024  
 DS 4  
 SWH 32894.738 Hz  
 FIDRES 0.501934 Hz  
 AQ 0.9961472 sec  
 RG 2580  
 DW 15.200 usec  
 DE 10.00 usec  
 TE 296.0 K  
 D1 2.00000000 sec  
 D11 0.03000000 sec  
 TD0 1

===== CHANNEL f1 =====  
 NUC1 13C  
 P1 10.20 usec  
 PL1 1.50 dB  
 PL1W 51.74793243 W  
 SFO1 125.7761482 MHz

===== CHANNEL f2 =====  
 CPDPRG2 waltz16  
 NUC2 1H  
 PCPD2 100.00 usec  
 PL2 1.00 dB  
 PL12 19.99 dB  
 PL13 21.00 dB  
 PL2W 19.75309753 W  
 PL12W 0.24925002 W  
 PL13W 0.19753097 W  
 SFO2 500.1550006 MHz

F2 - Processing parameters  
 SI 32768  
 SF 125.7635720 MHz  
 WDW EM  
 SSB 0  
 LB 1.00 Hz  
 GB 0  
 PC 1.40

<sup>13</sup>C-NMR (S,S,R)-35b

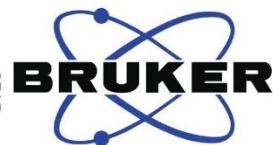

Current Data Parameters  
 NAME Apr08-2021  
 EXPNO 40  
 PROCNO 1

F2 - Acquisition Parameters  
 Date\_ 20210408  
 Time 14.53  
 INSTRUM spect  
 PROBHD 5 mm PABBO BB-  
 PULPROG zg30  
 TD 32768  
 SOLVENT CDCl3  
 NS 32  
 DS 0  
 SWH 10330.578 Hz  
 FIDRES 0.315264 Hz  
 AQ 1.5859712 sec  
 RG 322  
 DW 48.400 usec  
 DE 10.00 usec  
 TE 300.0 K  
 D1 2.00000000 sec  
 TD0 1

===== CHANNEL f1 =====  
 NUC1 1H  
 P1 11.23 usec  
 PL1 1.00 dB  
 PL1W 19.75309753 W  
 SFO1 500.1360886 MHz

F2 - Processing parameters  
 SI 16384  
 SF 500.1330160 MHz  
 WDW EM  
 SSB 0  
 LB 0.30 Hz  
 GB 0  
 PC 1.00

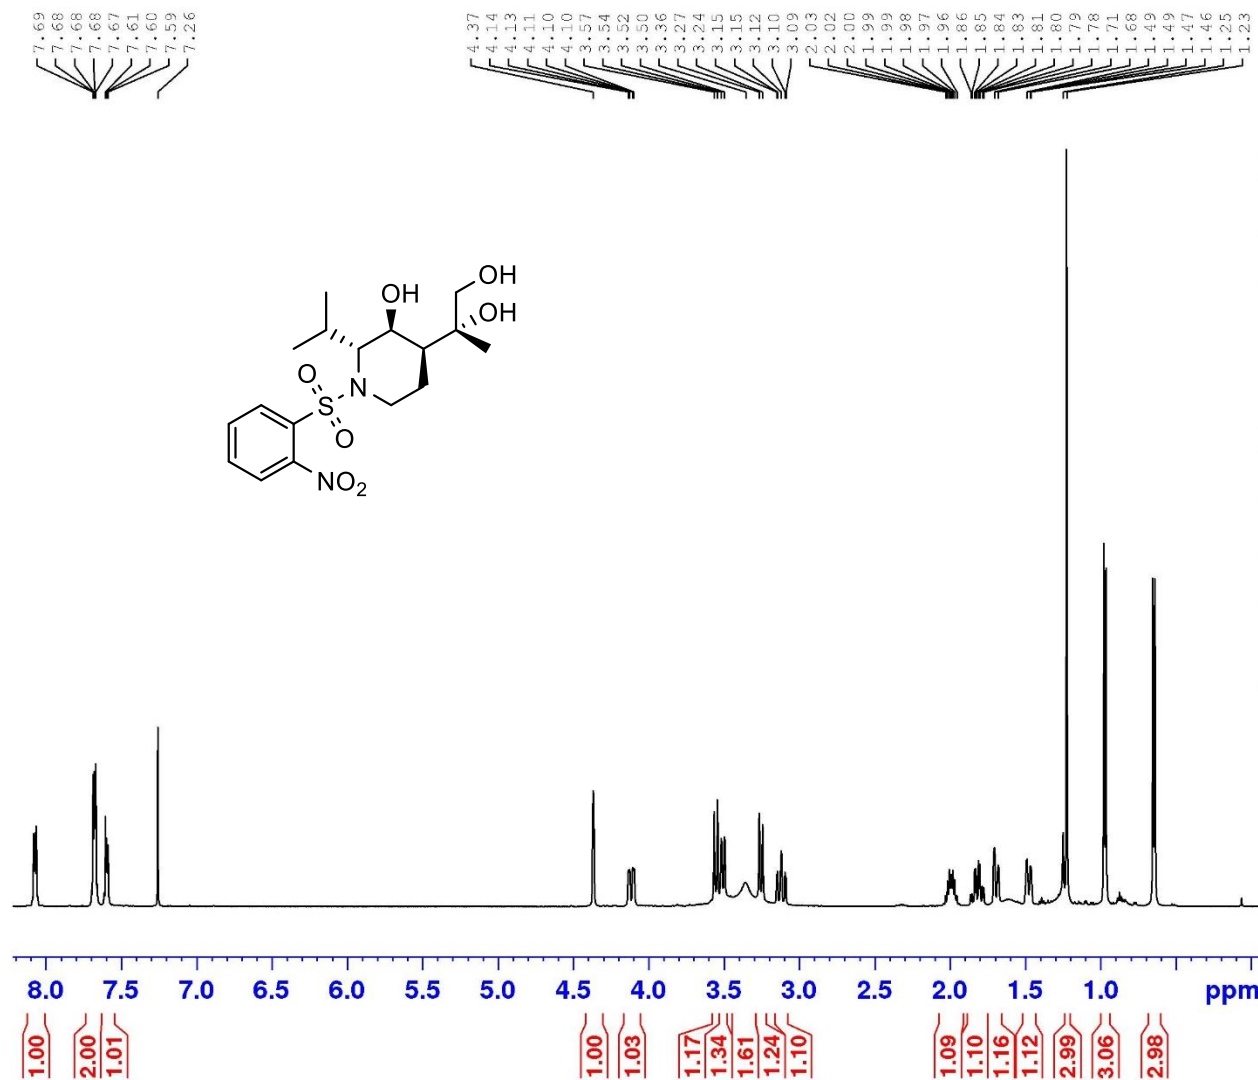

<sup>1</sup>H-NMR (S,S,R)-36b

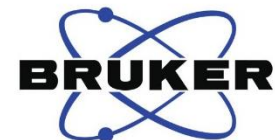

Current Data Parameters  
 NAME Apr08-2021  
 EXPNO 41  
 PROCNO 1

F2 - Acquisition Parameters  
 Date\_ 20210408  
 Time 15.47  
 INSTRUM spect  
 PROBHD 5 mm PABBO BB-  
 PULPROG zgpg30  
 TD 65536  
 SOLVENT CDC13  
 NS 1024  
 DS 4  
 SWH 32894.738 Hz  
 FIDRES 0.501934 Hz  
 AQ 0.9961472 sec  
 RG 2580  
 DW 15.200 usec  
 DE 10.00 usec  
 TE 296.0 K  
 D1 2.00000000 sec  
 D11 0.03000000 sec  
 TD0 1

===== CHANNEL f1 =====  
 NUC1 13C  
 P1 10.20 usec  
 PL1 1.50 dB  
 PL1W 51.74793243 W  
 SFO1 125.7761482 MHz

===== CHANNEL f2 =====  
 CPDPRG[2] waltz16  
 NUC2 1H  
 PCPD2 100.00 usec  
 PL2 1.00 dB  
 PL12 19.99 dB  
 PL13 21.00 dB  
 PL2W 19.75309753 W  
 PL12W 0.24925002 W  
 PL13W 0.19753097 W  
 SFO2 500.1550006 MHz

F2 - Processing parameters  
 SI 32768  
 SF 125.7635720 MHz  
 WDW EM  
 SSB 0  
 LB 1.00 Hz  
 GB 0  
 PC 1.40

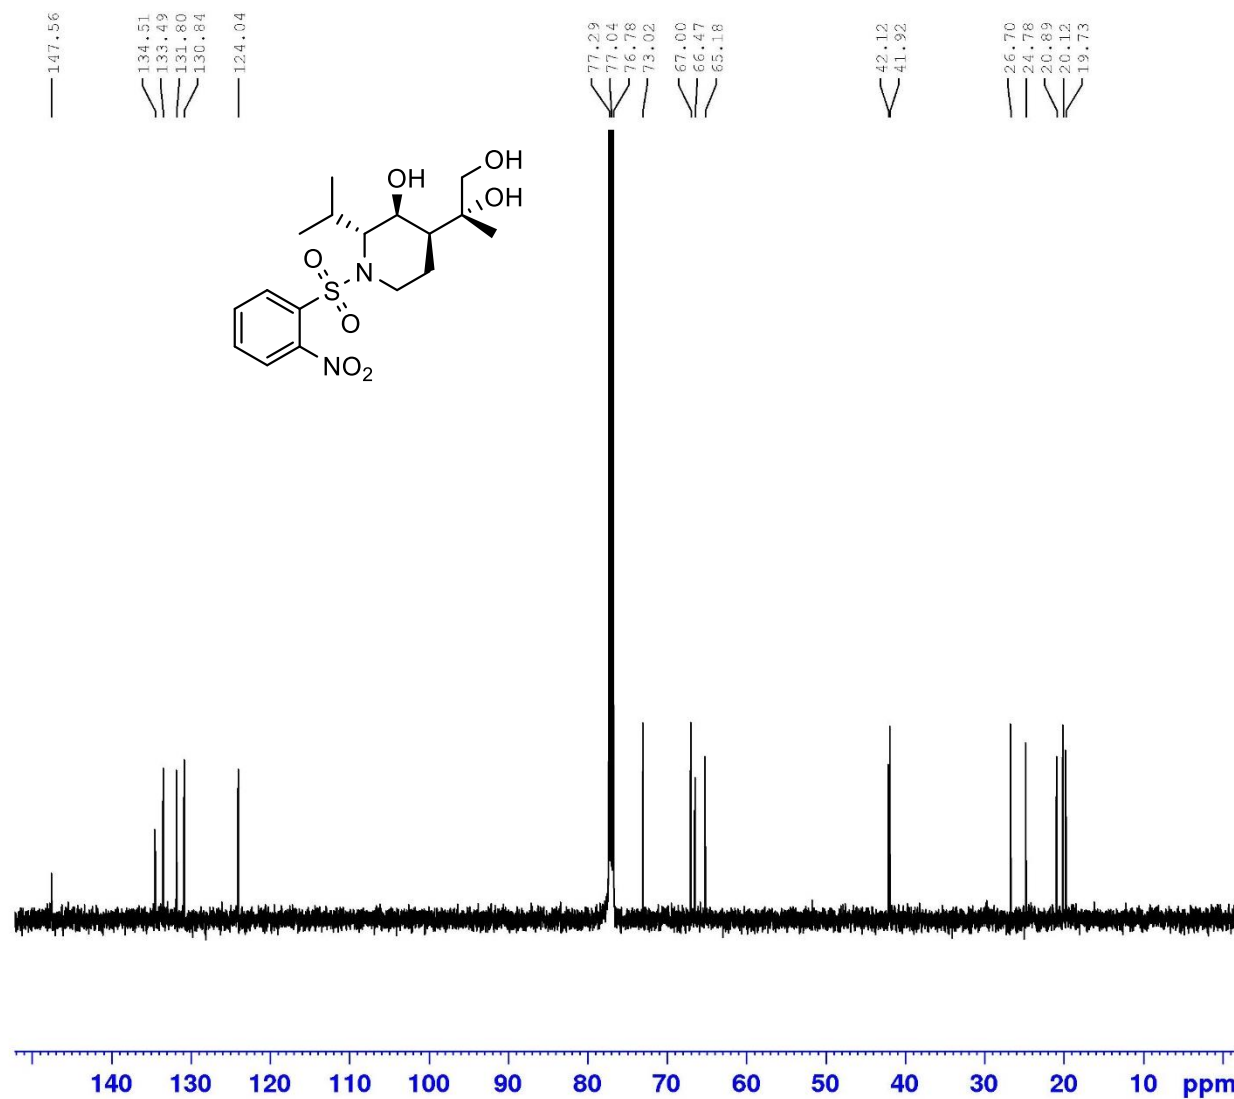

<sup>13</sup>C-NMR (S,S,R)-36b

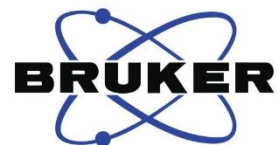

Current Data Parameters  
 NAME Apr08-2021  
 EXPNO 50  
 PROCNO 1

F2 - Acquisition Parameters  
 Date\_ 20210408  
 Time 15.54  
 INSTRUM spect  
 PROBHD 5 mm PABBO BB-  
 PULPROG zg30  
 TD 32768  
 SOLVENT CDCl3  
 NS 32  
 DS 0  
 SWH 10330.578 Hz  
 FIDRES 0.315264 Hz  
 AQ 1.5859712 sec  
 RG 228  
 DW 48.400 usec  
 DE 10.00 usec  
 TE 296.0 K  
 D1 2.00000000 sec  
 TD0 1

===== CHANNEL f1 =====  
 NUC1 1H  
 P1 11.23 usec  
 PL1 1.00 dB  
 PL1W 19.75309753 W  
 SFO1 500.1560886 MHz

F2 - Processing parameters  
 SI 16384  
 SF 500.1530174 MHz  
 WDW EM  
 SSB 0  
 LB 0.30 Hz  
 GB 0  
 PC 1.00

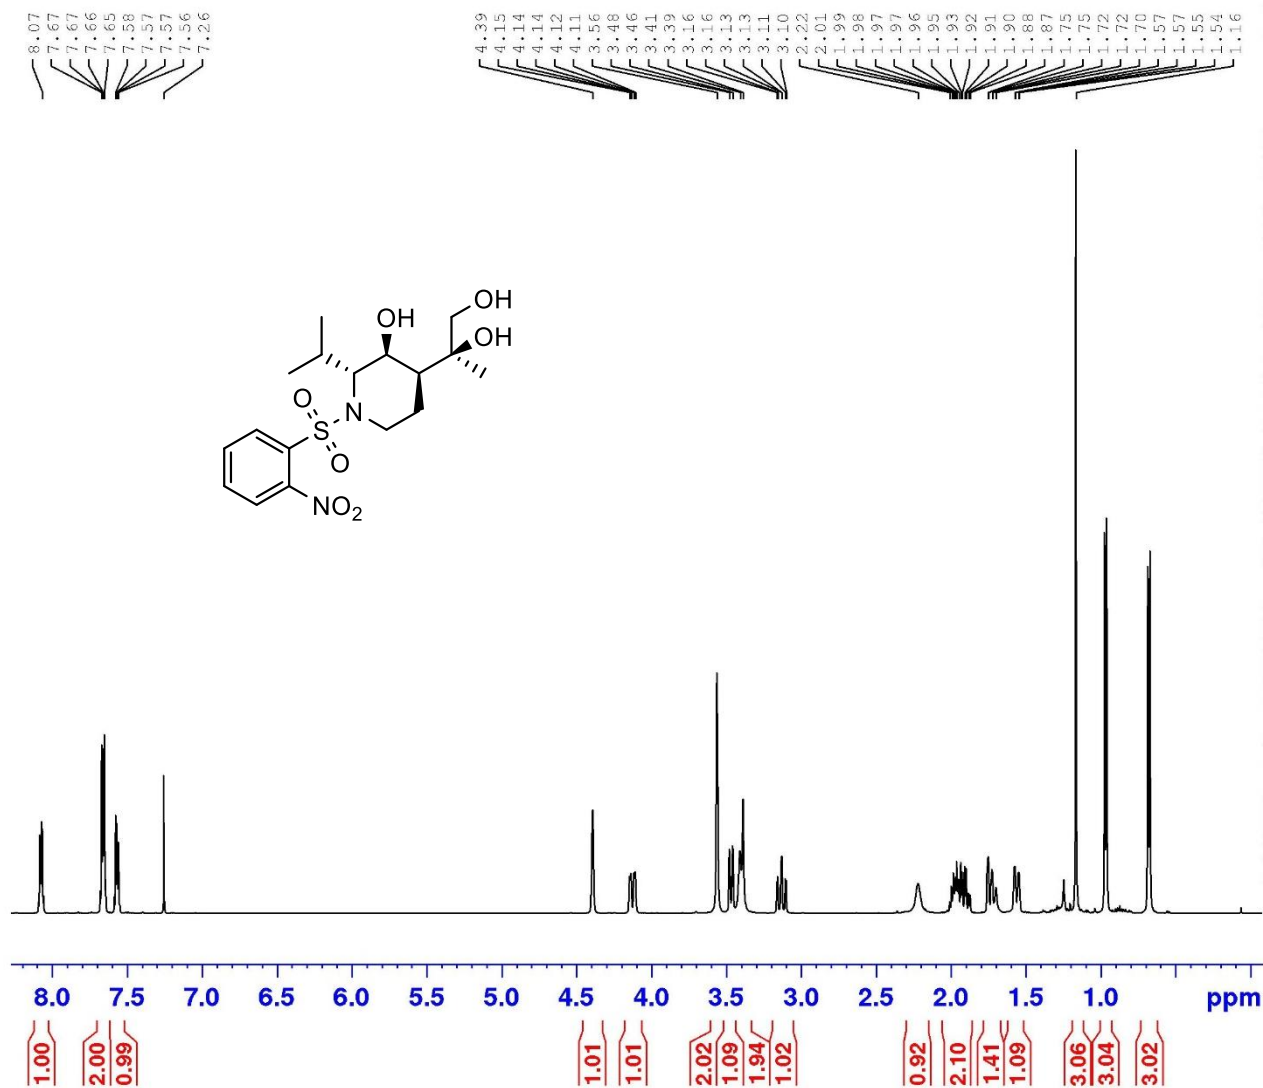

<sup>1</sup>H-NMR (S,S,S)-36b

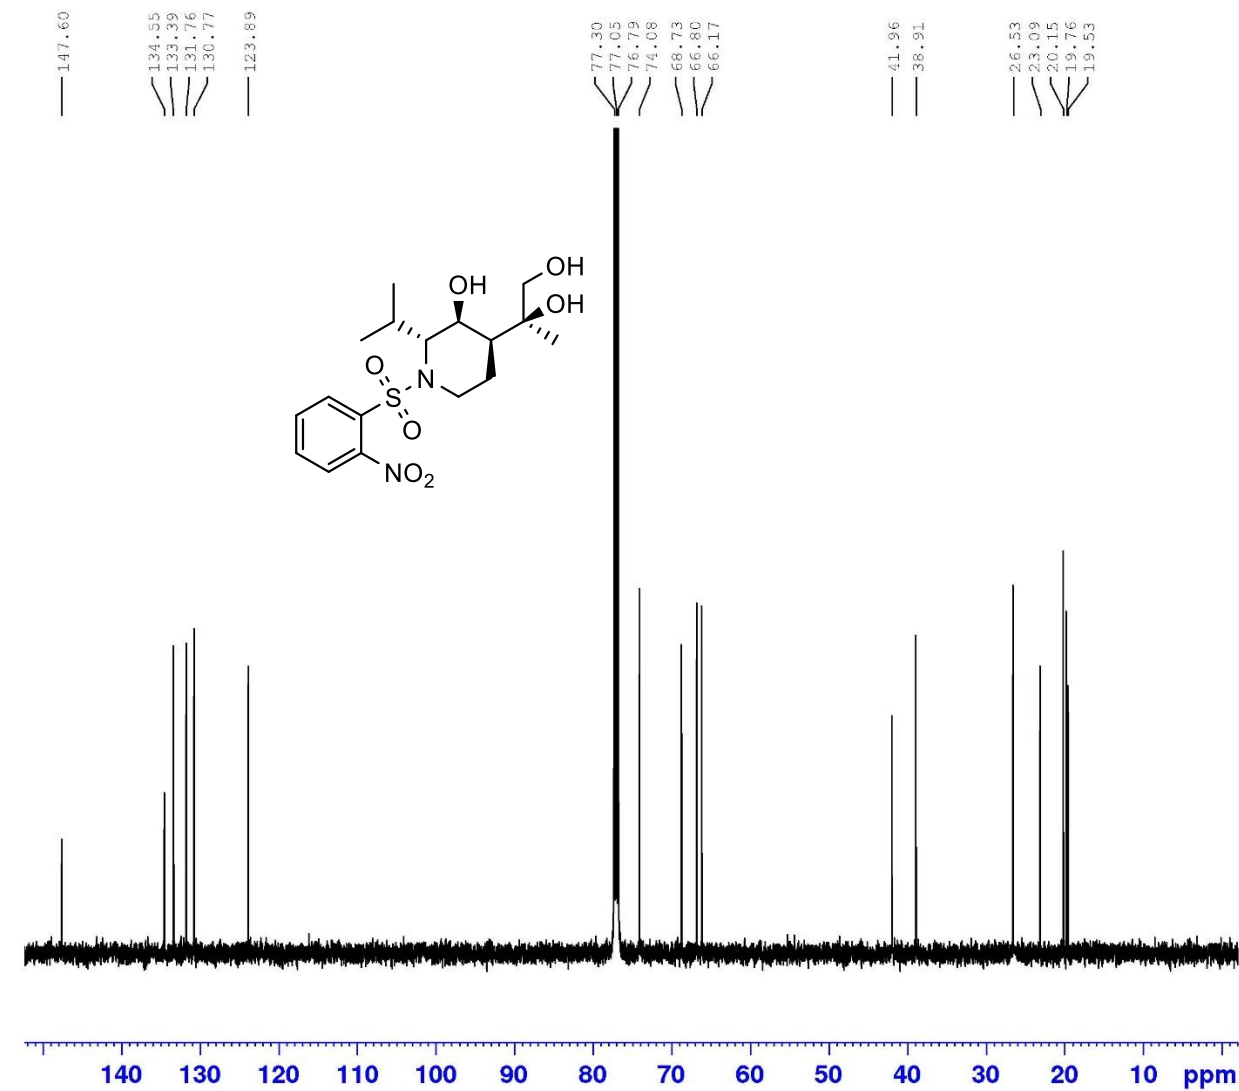

<sup>13</sup>C-NMR (S,S,S)-36b

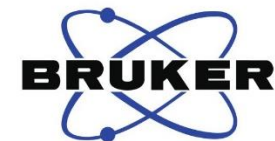

Current Data Parameters  
NAME Apr08-2021  
EXPNO 51  
PROCNO 1

F2 - Acquisition Parameters  
Date\_ 20210408  
Time 16.48  
INSRUM spect  
PROBHD 5 mm PABBO BB-  
PULPROG zgpg30  
TD 65536  
SOLVENT CDCl3  
NS 1024  
DS 4  
SWH 32894.738 Hz  
FIDRES 0.501934 Hz  
AQ 0.9961472 sec  
RG 2580  
DW 15.200 usec  
DE 10.00 usec  
TE 296.0 K  
D1 2.00000000 sec  
D11 0.03000000 sec  
TD0 1

===== CHANNEL f1 =====  
NUC1 13C  
P1 10.20 usec  
PL1 1.50 dB  
PL1W 51.74793243 W  
SFO1 125.7761482 MHz

===== CHANNEL f2 =====  
CPDPRG[2] waltz16  
NUC2 1H  
PCPD2 100.00 usec  
PL2 1.00 dB  
PL12 19.99 dB  
PL13 21.00 dB  
PL2W 19.75309753 W  
PL12W 0.24925002 W  
PL13W 0.19753097 W  
SFO2 500.1550006 MHz

F2 - Processing parameters  
SI 32768  
SF 125.7635720 MHz  
WDW EM  
SSB 0  
LB 1.00 Hz  
GB 0  
PC 1.40

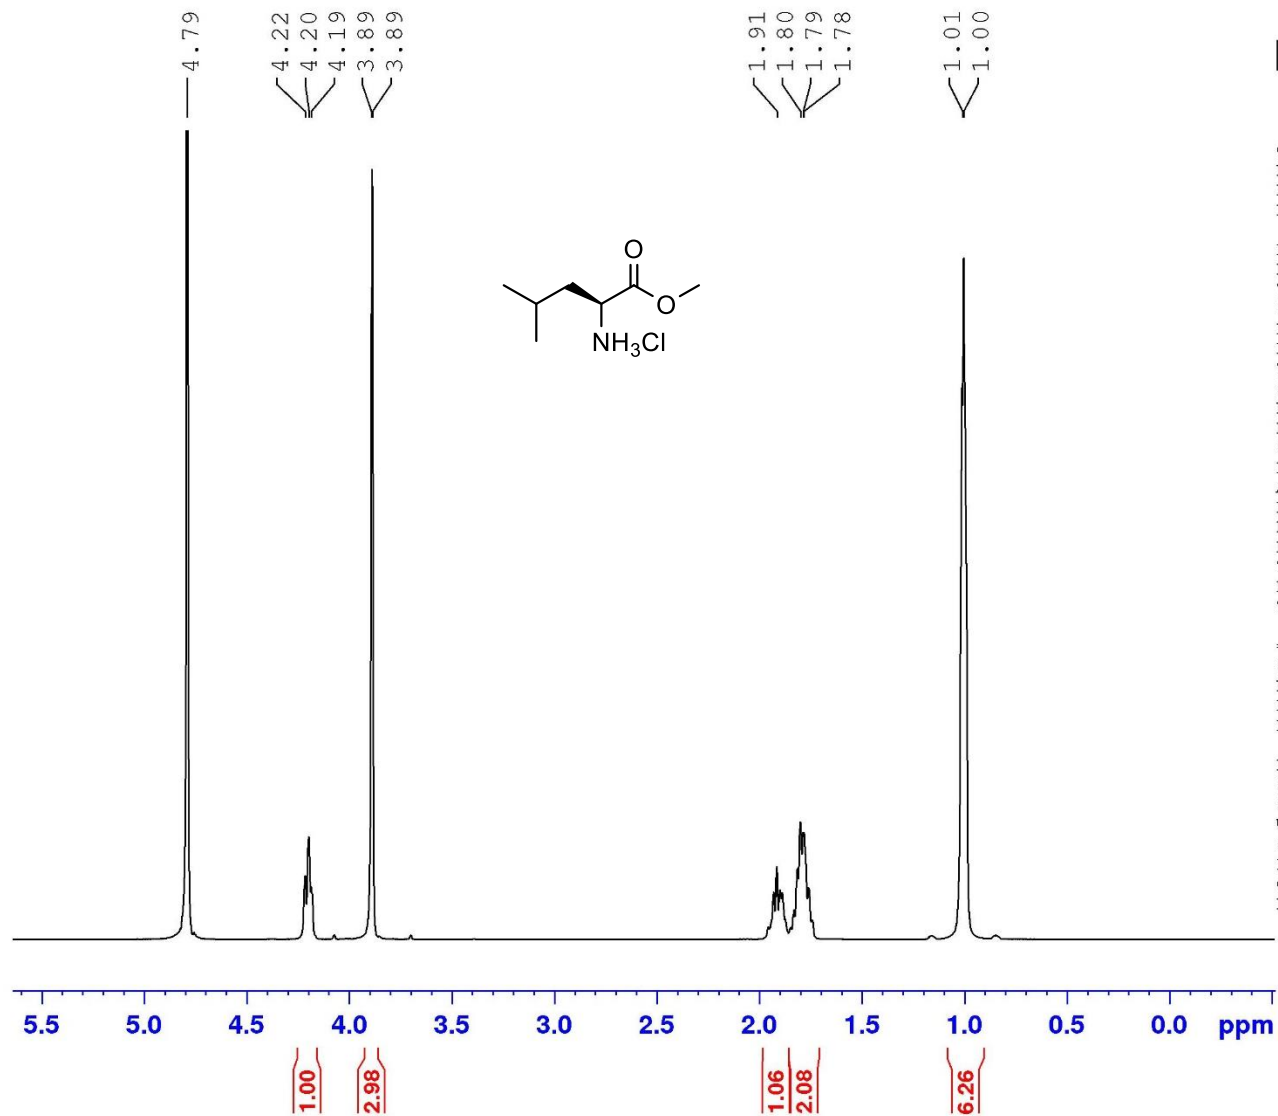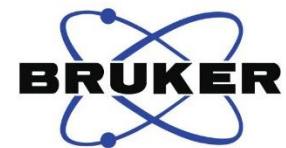

Current Data Parameters  
 NAME Mar05-2020  
 EXPNO 360  
 PROCNO 1

F2 - Acquisition Parameters  
 Date\_ 20200306  
 Time 0.19  
 INSTRUM spect  
 PROBHD 5 mm PABBO BB/  
 PULPROG zg30  
 TD 65536  
 SOLVENT D2O  
 NS 16  
 DS 2  
 SWH 8012.820 Hz  
 FIDRES 0.122266 Hz  
 AQ 4.0894465 sec  
 RG 124.07  
 DW 62.400 usec  
 DE 6.50 usec  
 TE 298.0 K  
 D1 1.00000000 sec  
 TD0 1

===== CHANNEL f1 =====  
 SFO1 400.1024708 MHz  
 NUC1 1H  
 P1 13.70 usec  
 PLW1 12.00000000 W

F2 - Processing parameters  
 SI 65536  
 SF 400.0999646 MHz  
 WDW EM  
 SSB 0  
 LB 0.30 Hz  
 GB 0  
 PC 1.00

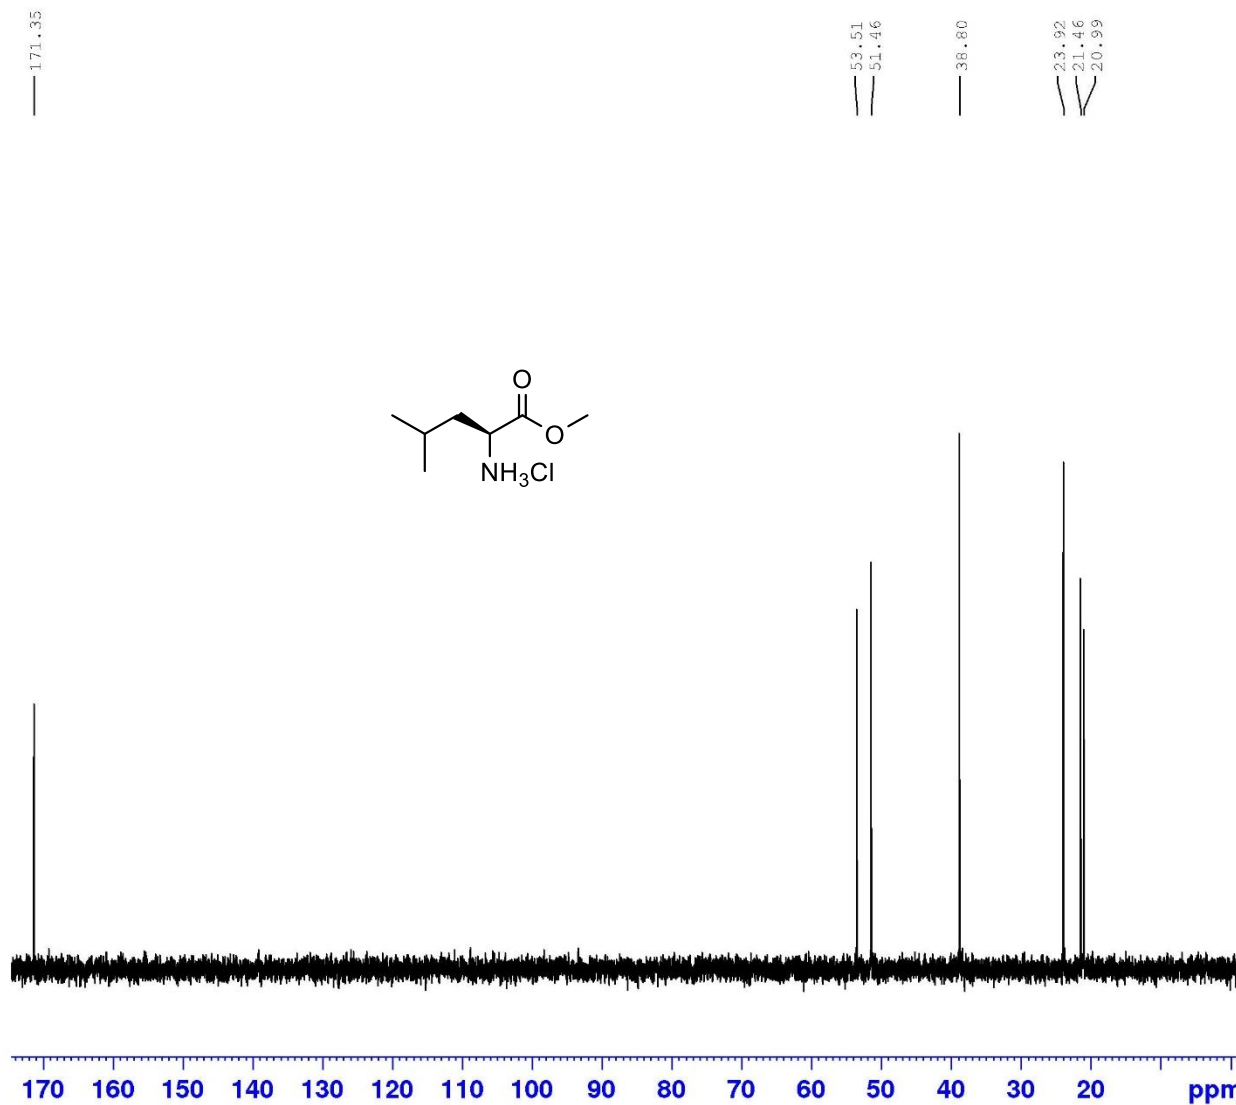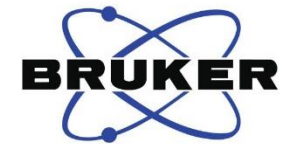

Current Data Parameters  
 NAME Mar05-2020  
 EXPNO 361  
 PROCNO 1

F2 - Acquisition Parameters  
 Date\_ 20200306  
 Time 0.49  
 INSTRUM spect  
 PROBHD 5 mm PABBO BB/  
 PULPROG zgpg30  
 TD 65536  
 SOLVENT D2O  
 NS 512  
 DS 4  
 SWH 24038.461 Hz  
 FIDRES 0.366798 Hz  
 AQ 1.3631488 sec  
 RG 205.35  
 DW 20.800 usec  
 DE 6.50 usec  
 TE 298.0 K  
 D1 2.00000000 sec  
 D11 0.03000000 sec  
 TD0 1

===== CHANNEL f1 =====  
 SFO1 100.6152851 MHz  
 NUC1 13C  
 P1 10.00 usec  
 PLW1 48.00000000 W

===== CHANNEL f2 =====  
 SFO2 400.1016004 MHz  
 NUC2 1H  
 CPDPRG[2] waltz16  
 PCPD2 90.00 usec  
 PLW2 12.00000000 W  
 PLW12 0.27805999 W  
 PLW13 0.22522999 W

F2 - Processing parameters  
 SI 32768  
 SF 100.6052250 MHz  
 WDW EM  
 SSB 0  
 LB 1.00 Hz  
 GB 0  
 PC 1.40

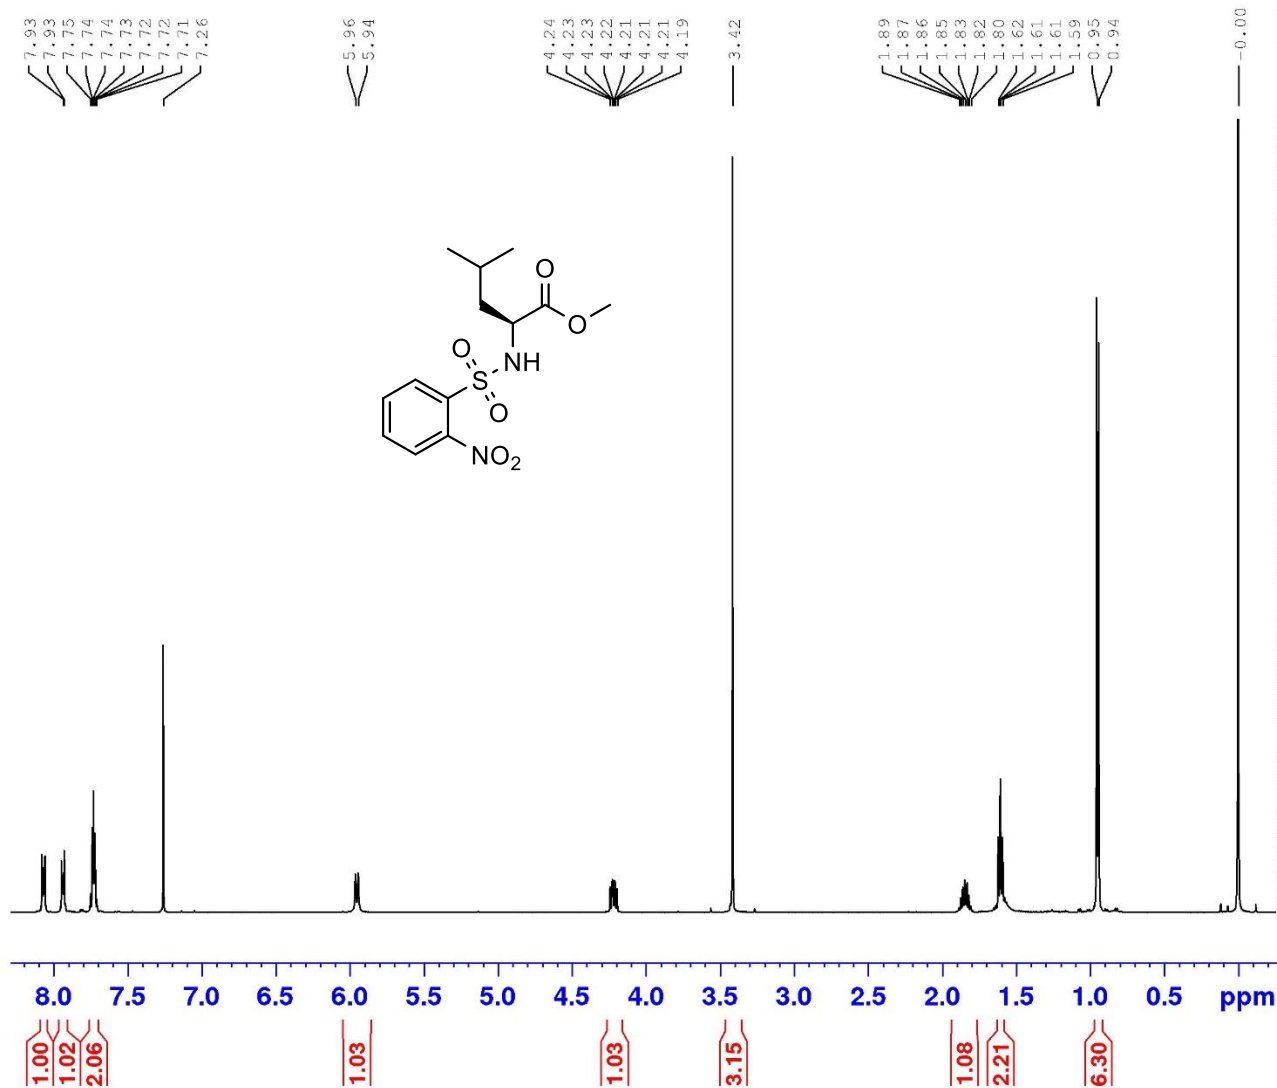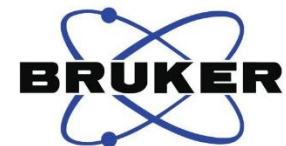

Current Data Parameters  
 NAME Apr08-2020  
 EXPNO 90  
 PROCNO 1

F2 - Acquisition Parameters  
 Date\_ 20200408  
 Time 16.26  
 INSTRUM spect  
 PROBHD 5 mm PABBO BB-  
 PULPROG zg30  
 TD 32768  
 SOLVENT CDCl3  
 NS 32  
 DS 0  
 SWH 10330.578 Hz  
 FIDRES 0.315264 Hz  
 AQ 1.5859712 sec  
 RG 456  
 DW 48.400 usec  
 DE 10.00 usec  
 TE 300.0 K  
 D1 2.00000000 sec  
 TDO 1

===== CHANNEL f1 =====  
 NUC1 1H  
 P1 11.23 usec  
 PL1 1.00 dB  
 PL1W 19.75309753 W  
 SFO1 500.1560886 MHz

F2 - Processing parameters  
 SI 16384  
 SF 500.1530150 MHz  
 WDW EM  
 SSB 0  
 LB 0.30 Hz  
 GB 0  
 PC 1.00

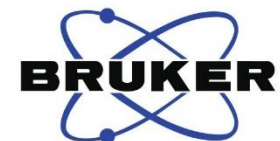

Current Data Parameters  
 NAME Apr23-2020  
 EXPNO 100  
 PROCNO 1

F2 - Acquisition Parameters  
 Date\_ 20200424  
 Time 8.33  
 INSTRUM spect  
 PROBHD 5 mm PABBO BB-  
 PULPROG zgpg30  
 TD 65536  
 SOLVENT CDCl3  
 NS 1024  
 DS 4  
 SWH 32894.738 Hz  
 FIDRES 0.501934 Hz  
 AQ 0.9961472 sec  
 RG 2580  
 DW 15.200 usec  
 DE 10.00 usec  
 TE 300.0 K  
 D1 2.00000000 sec  
 D11 0.03000000 sec  
 TD0 1

===== CHANNEL f1 =====  
 NUC1 13C  
 P1 10.20 usec  
 PL1 1.50 dB  
 PL1W 51.74793243 W  
 SFO1 125.7761482 MHz

===== CHANNEL f2 =====  
 CPDPRG[2] waltz16  
 NUC2 1H  
 PCPD2 100.00 usec  
 PL2 1.00 dB  
 PL12 19.99 dB  
 PL13 21.00 dB  
 PL2W 19.75309753 W  
 PL12W 0.24925002 W  
 PL13W 0.19753097 W  
 SFO2 500.1550006 MHz

F2 - Processing parameters  
 SI 32768  
 SF 125.7635737 MHz  
 WDW EM  
 SSB 0  
 LB 1.00 Hz  
 GB 0  
 PC 1.40

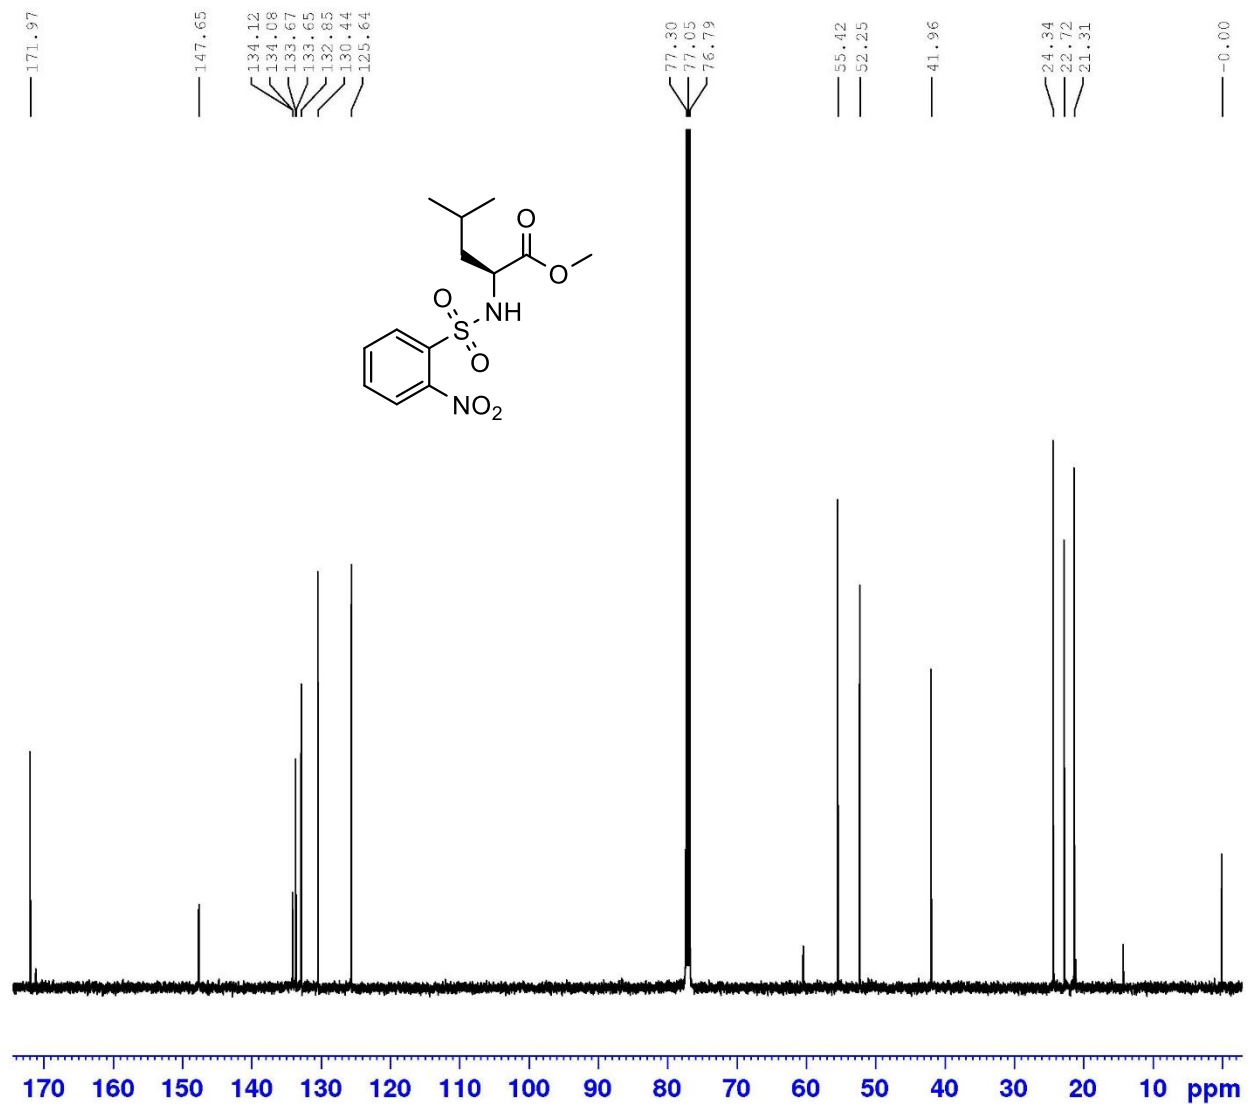

<sup>13</sup>C-NMR 26c

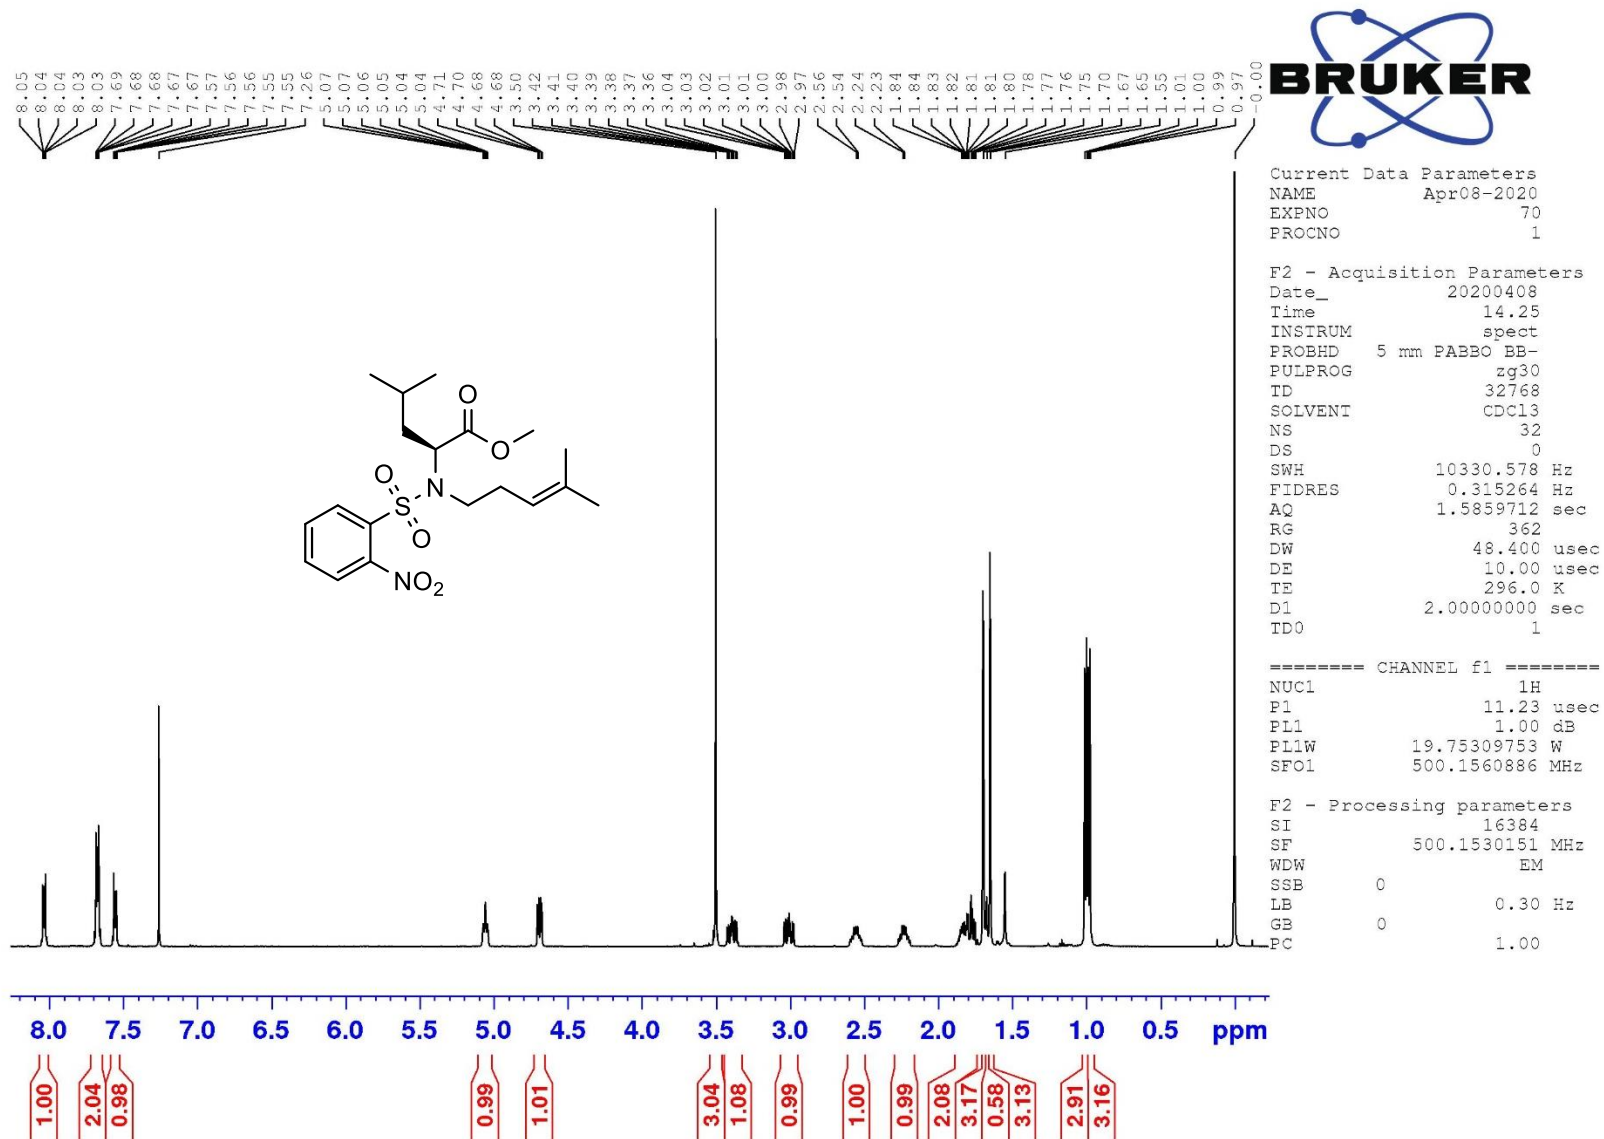

<sup>1</sup>H-NMR 27c

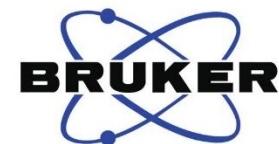

Current Data Parameters  
 NAME Apr08-2020  
 EXPNO 71  
 PROCNO 1

F2 - Acquisition Parameters  
 Date\_ 20200408  
 Time 15.19  
 INSTRUM spect  
 PROBHD 5 mm PABBO BB-  
 PULPROG zgpg30  
 TD 65536  
 SOLVENT CDCl3  
 NS 1024  
 DS 4  
 SWH 32894.738 Hz  
 FIDRES 0.501934 Hz  
 AQ 0.9961472 sec  
 RG 2580  
 DW 15.200 usec  
 DE 10.00 usec  
 TE 296.0 K  
 D1 2.00000000 sec  
 D11 0.03000000 sec  
 TD0 1

===== CHANNEL f1 =====  
 NUC1 13C  
 P1 10.20 usec  
 PL1 1.50 dB  
 PL1W 51.74793243 W  
 SFO1 125.7761482 MHz

===== CHANNEL f2 =====  
 CPDPRG[2] waltz16  
 NUC2 1H  
 PCPD2 100.00 usec  
 PL2 1.00 dB  
 PL12 19.99 dB  
 PL13 21.00 dB  
 PL2W 19.75309753 W  
 PL12W 0.24925002 W  
 PL13W 0.19753097 W  
 SFO2 500.1550006 MHz

F2 - Processing parameters  
 SI 32768  
 SF 125.7635740 MHz  
 WDW EM  
 SSB 0  
 LB 1.00 Hz  
 GB 0  
 PC 1.40

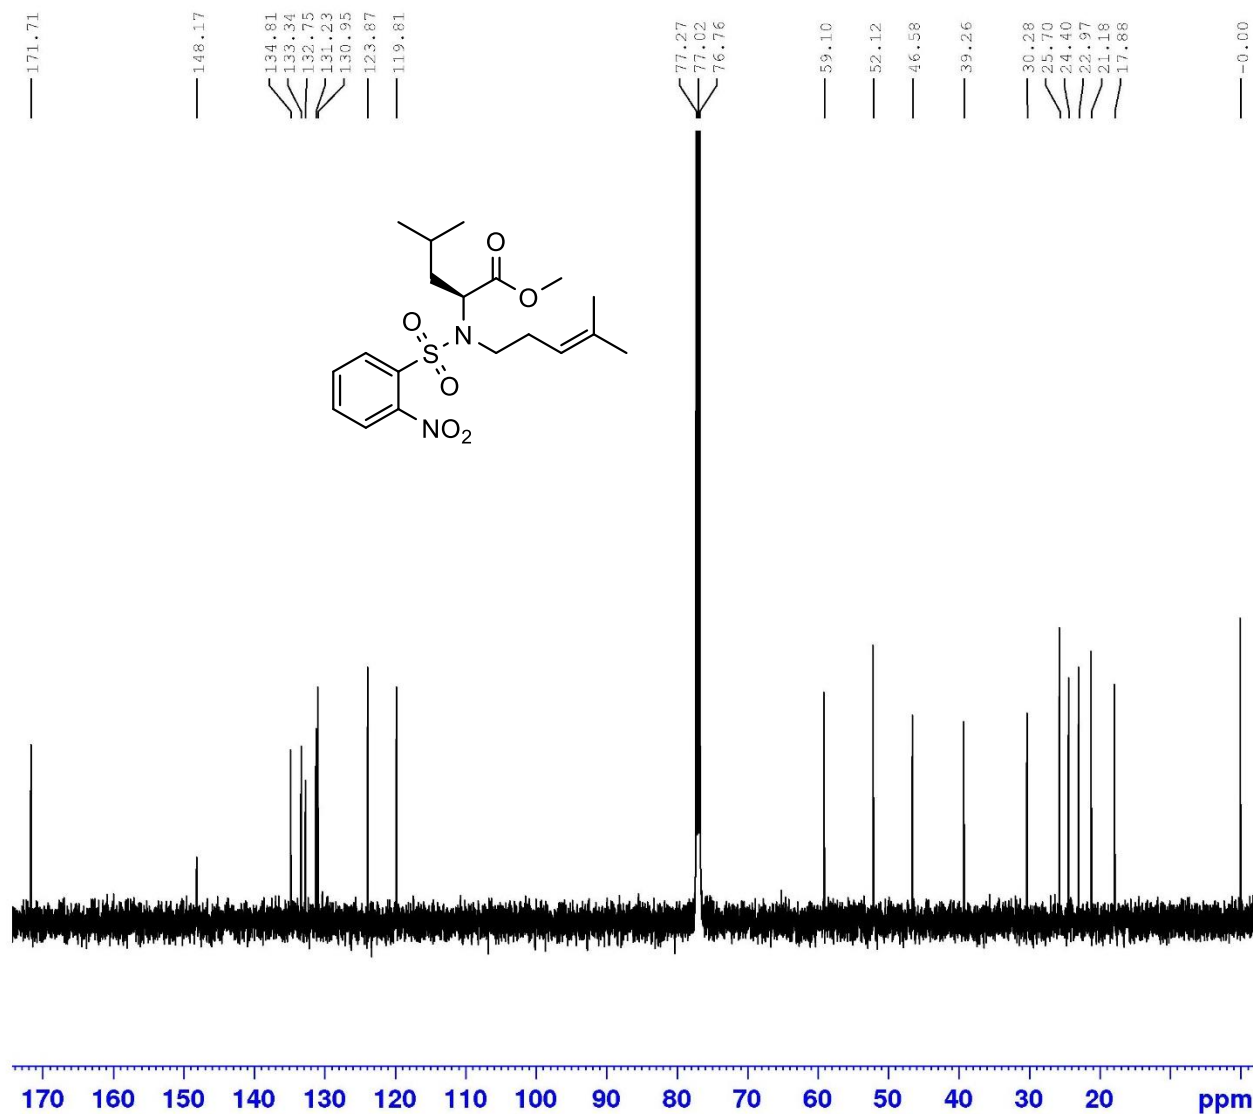

<sup>13</sup>C-NMR 27c

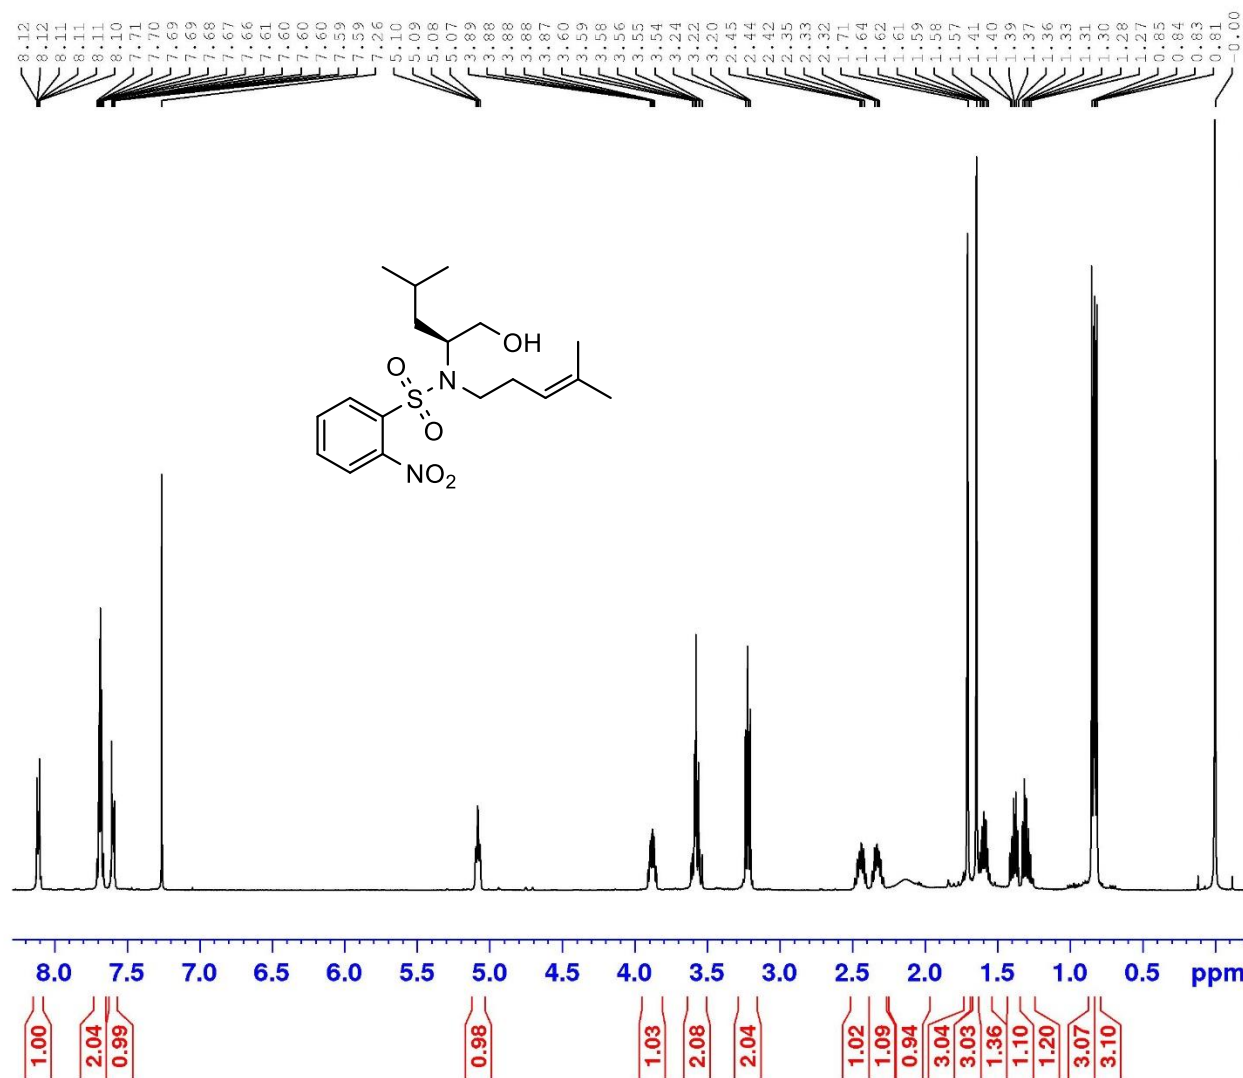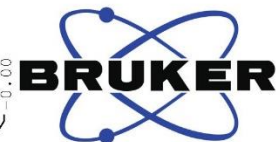

Current Data Parameters  
 NAME Apr08-2020  
 EXPNO 60  
 PROCNO 1

F2 - Acquisition Parameters  
 Date\_ 20200408  
 Time 14.18  
 INSTRUM spect  
 PROBHD 5 mm PABBO BB-  
 PULPROG zg30  
 TD 32768  
 SOLVENT CDCl3  
 NS 64  
 DS 0  
 SWH 10330.578 Hz  
 FIDRES 0.315264 Hz  
 AQ 1.5859712 sec  
 RG 362  
 DW 48.400 usec  
 DE 10.00 usec  
 TE 296.0 K  
 D1 2.00000000 sec  
 TD0 1

===== CHANNEL f1 =====  
 NUC1 1H  
 P1 11.23 usec  
 PL1 1.00 dB  
 PL1W 19.75309753 W  
 SFO1 500.1560886 MHz

F2 - Processing parameters  
 SI 16384  
 SF 500.1530150 MHz  
 WDW EM  
 SSB 0  
 LB 0.30 Hz  
 GB 0  
 PC 1.00

<sup>1</sup>H-NMR 28c

S160

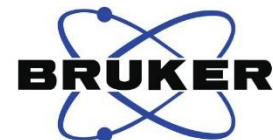

Current Data Parameters  
 NAME Jan28-2019  
 EXPNO 61  
 PROCNO 1

F2 - Acquisition Parameters  
 Date\_ 20190128  
 Time 19.04  
 INSTRUM spect  
 PROBHD 5 mm PABBO BB-  
 PULPROG zgpg30  
 TD 65536  
 SOLVENT CDCl3  
 NS 1024  
 DS 4  
 SWH 32894.738 Hz  
 FIDRES 0.501934 Hz  
 AQ 0.9961472 sec  
 RG 2890  
 DW 15.200 usec  
 DE 10.00 usec  
 TE 296.0 K  
 D1 2.00000000 sec  
 D11 0.03000000 sec  
 TD0 1

===== CHANNEL f1 =====  
 NUC1 13C  
 P1 10.20 usec  
 PL1 1.50 dB  
 PL1W 51.74793243 W  
 SFO1 125.7761482 MHz

===== CHANNEL f2 =====  
 CPDPRG[2] waltz16  
 NUC2 1H  
 PCPD2 100.00 usec  
 PL2 1.00 dB  
 PL12 19.99 dB  
 PL13 21.00 dB  
 PL2W 19.75309753 W  
 PL12W 0.24925002 W  
 PL13W 0.19753097 W  
 SFO2 500.1550006 MHz

F2 - Processing parameters  
 SI 32768  
 SF 125.7635720 MHz  
 WDW EM  
 SSB 0  
 LB 1.00 Hz  
 GB 0  
 PC 1.40

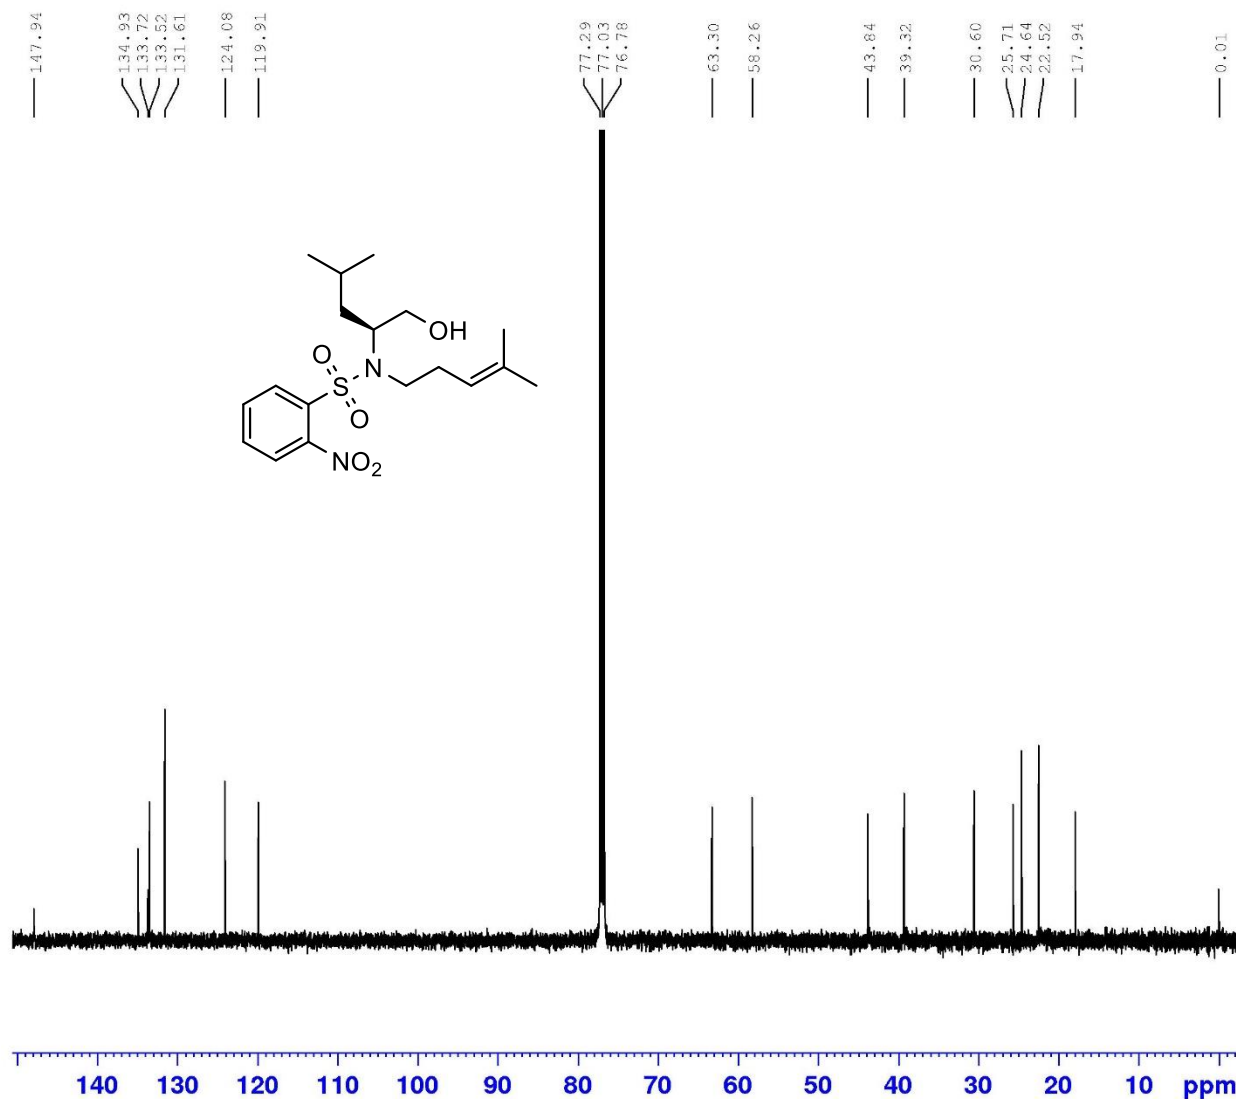

<sup>13</sup>C-NMR 28c

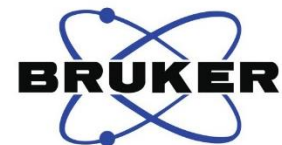

Current Data Parameters  
NAME Jan30-2019  
EXPNO 70  
PROCNO 1

F2 - Acquisition Parameters  
Date\_ 20190130  
Time 20.58  
INSTRUM spect  
PROBHD 5 mm PABBO BB-  
PULPROG zg30  
TD 32768  
SOLVENT CDCl3  
NS 32  
DS 0  
SWH 10330.578 Hz  
FIDRES 0.315264 Hz  
AQ 1.5859712 sec  
RG 456  
DW 48.400 usec  
DE 10.00 usec  
TE 296.0 K  
D1 2.00000000 sec  
TD0 1

===== CHANNEL f1 =====  
NUC1 1H  
P1 11.23 usec  
PL1 1.00 dB  
PL1W 19.75309753 W  
SFO1 500.1560886 MHz

F2 - Processing parameters  
SI 16384  
SF 500.1530154 MHz  
WDW EM  
SSB 0  
LB 0.30 Hz  
GB 0  
PC 1.00

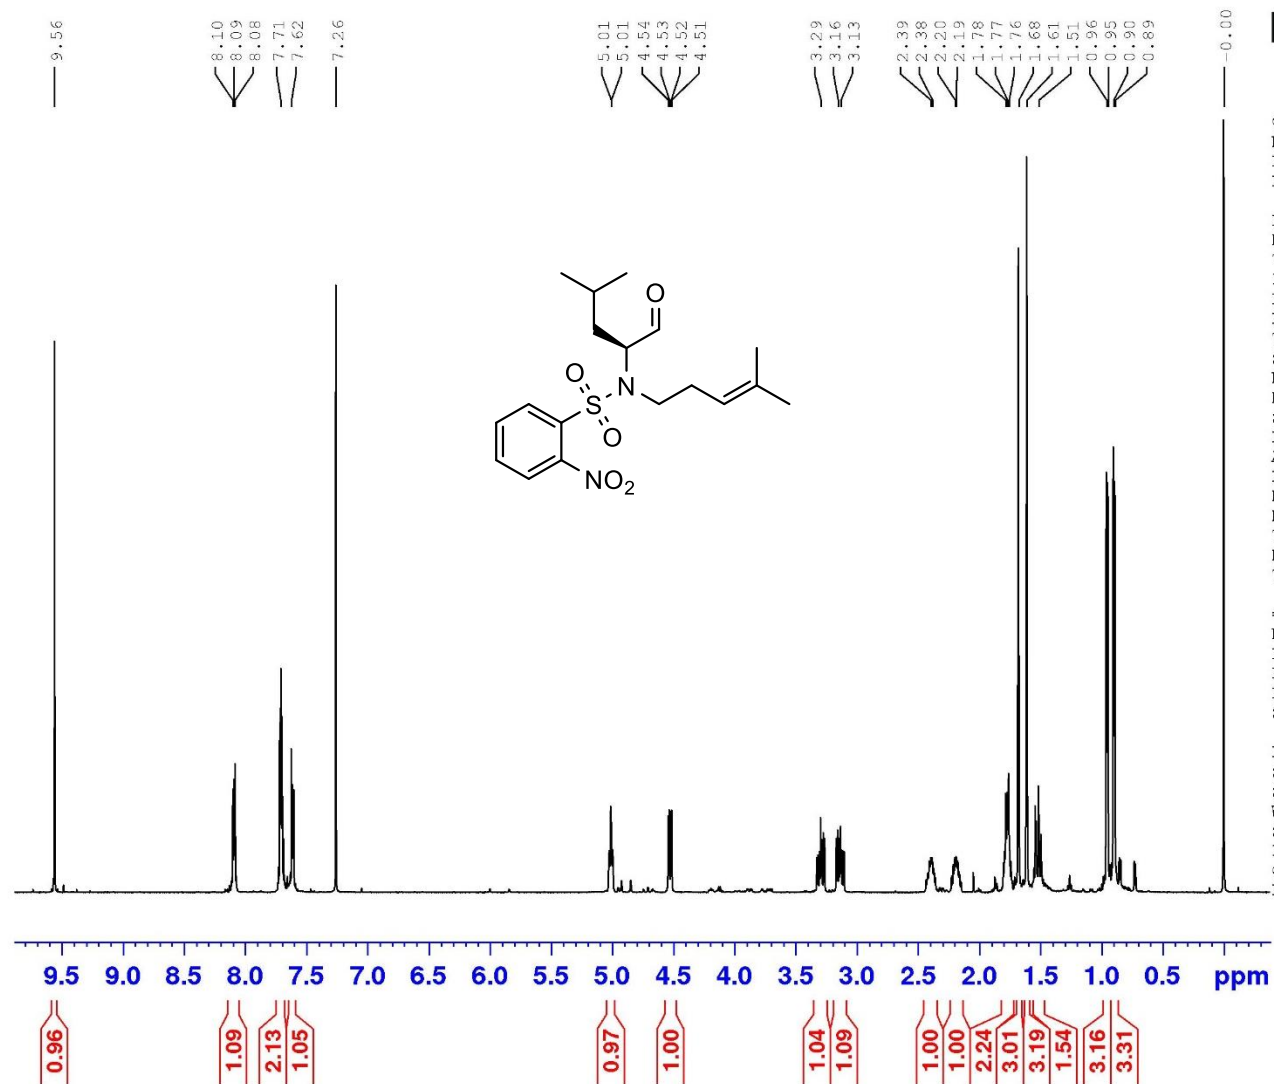

<sup>1</sup>H-NMR 29c

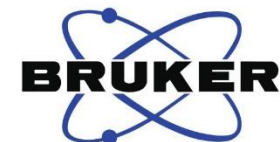

Current Data Parameters  
 NAME Jan30-2019  
 EXPNO 71  
 PROCNO 1

F2 - Acquisition Parameters  
 Date\_ 20190130  
 Time 21.53  
 INSTRUM spect  
 PROBHD 5 mm PABBO BB-  
 PULPROG zgpg30  
 TD 65536  
 SOLVENT CDCl3  
 NS 1024  
 DS 4  
 SWH 32894.738 Hz  
 FIDRES 0.501934 Hz  
 AQ 0.9961472 sec  
 RG 2890  
 DW 15.200 usec  
 DE 10.00 usec  
 TE 296.0 K  
 D1 2.00000000 sec  
 D11 0.03000000 sec  
 TDO 1

===== CHANNEL f1 =====  
 NUC1 13C  
 P1 10.20 usec  
 PL1 1.50 dB  
 PL1W 51.74793243 W  
 SF01 125.7761482 MHz

===== CHANNEL f2 =====  
 CPDPRG[2] waltz16  
 NUC2 1H  
 PCPD2 100.00 usec  
 PL2 1.00 dB  
 PL12 19.99 dB  
 PL13 21.00 dB  
 PL2W 19.75309753 W  
 PL12W 0.24925002 W  
 PL13W 0.19753097 W  
 SF02 500.1550006 MHz

F2 - Processing parameters  
 SI 32768  
 SF 125.7635720 MHz  
 WDW EM  
 SSB 0  
 LB 1.00 Hz  
 GB 0  
 PC 1.40

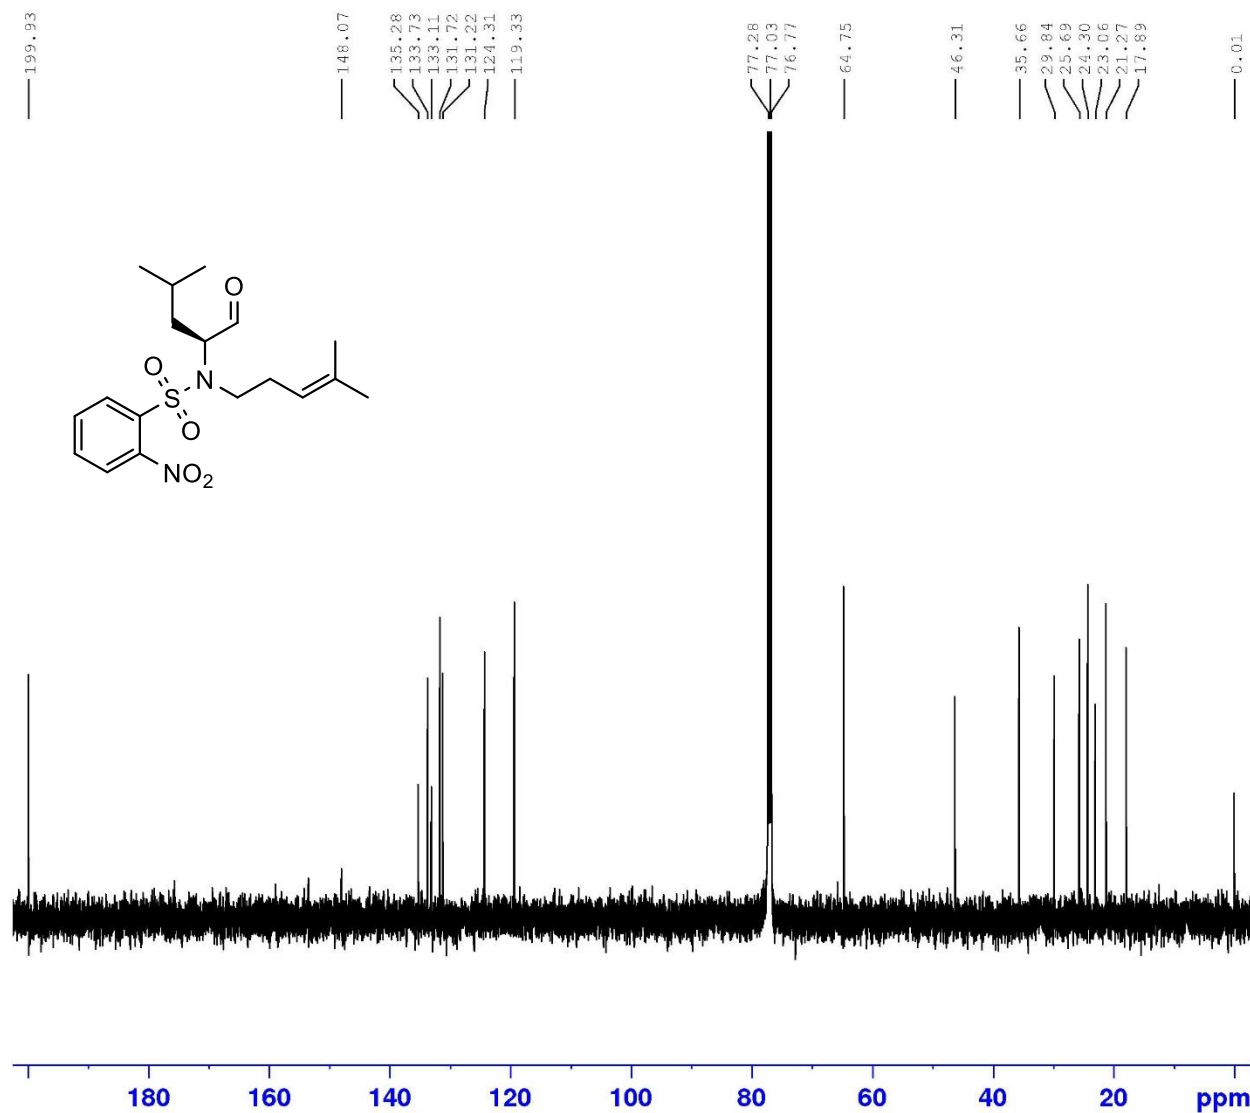

<sup>13</sup>C-NMR 29c

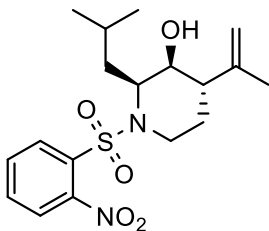

```
Current Data Parameters
NAME          Jul21-2021
EXPNO          40
PROCNO         1
```

```

F2 - Acquisition Parameters
Date_      20210721
Time       10.33
INSTRUM    spect
PROBHD     5 mm PABBO BB-
PULPROG    zg30
TD         32768
SOLVENT    CDC13
NS         32
DS         0
SWH        10330.578 Hz
FIDRES     0.315264 Hz
AQ         1.5859712 sec
RG         406
DW         48.400 usec
DE         10.00 usec
TE         296.0 K
D1         2.00000000 sec
TD0        1

```

```
===== CHANNEL f1 =====
NUC1                      1H
P1                          11.23 usec
PL1                         1.00 dB
PL1W                       19.75309753 W
SFO1                       500.1560886 MHz
```

```
F2 - Processing parameters
SI                      16384
SF                      500.1530159 MHz
WDW                      EM
SSB                      0
LB                      0.30 Hz
GB                      0
PC                      1.00
```

<sup>1</sup>H-NMR (S,S)-**30c**

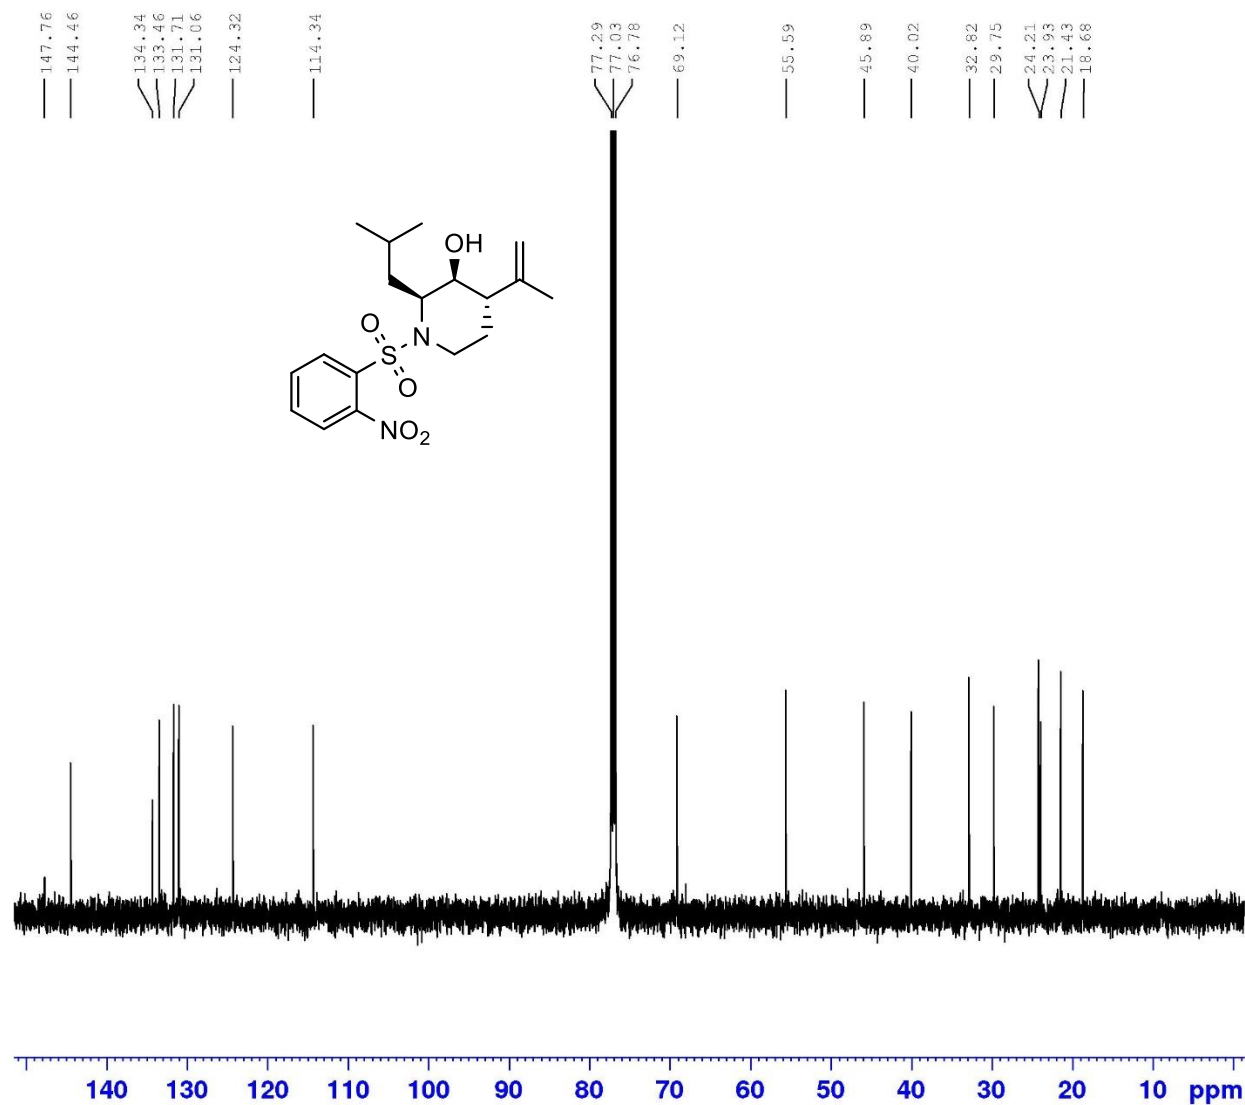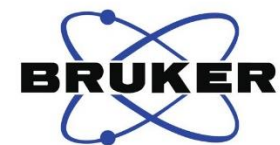

Current Data Parameters  
 NAME Jul21-2021  
 EXPNO 41  
 PROCNO 1

F2 - Acquisition Parameters  
 Date\_ 20210721  
 Time 11.27  
 INSTRUM spect  
 PROBHD 5 mm PABBO BB-  
 PULPROG zgpg30  
 TD 65536  
 SOLVENT CDCl3  
 NS 1024  
 DS 4  
 SWH 32894.738 Hz  
 FIDRES 0.501934 Hz  
 AQ 0.9961472 sec  
 RG 2580  
 DW 15.200 usec  
 DE 10.00 usec  
 TE 296.0 K  
 D1 2.00000000 sec  
 D11 0.03000000 sec  
 TD0 1

===== CHANNEL f1 =====  
 NUC1 13C  
 P1 10.20 usec  
 PL1 1.50 dB  
 PL1W 51.74793243 W  
 SFO1 125.7761482 MHz

===== CHANNEL f2 =====  
 CPDPRG[2] waltz16  
 NUC2 1H  
 PCPD2 100.00 usec  
 PL2 1.00 dB  
 PL12 19.99 dB  
 PL13 21.00 dB  
 PL2W 19.75309753 W  
 PL12W 0.24925002 W  
 PL13W 0.19753097 W  
 SFO2 500.1550006 MHz

F2 - Processing parameters  
 SI 32768  
 SF 125.7635720 MHz  
 WDW EM  
 SSB 0  
 LB 1.00 Hz  
 GB 0  
 PC 1.40

<sup>13</sup>C-NMR (S,S)-30c

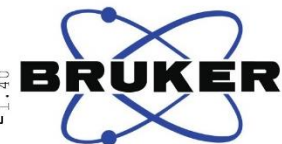

Current Data Parameters  
 NAME May08-2020  
 EXPNO 80  
 PROCNO 1

F2 - Acquisition Parameters  
 Date\_ 20200508  
 Time 12.21  
 INSTRUM spect  
 PROBHD 5 mm PABBO BB-  
 PULPROG zg30  
 TD 32768  
 SOLVENT CDCl3  
 NS 32  
 DS 0  
 SWH 10330.578 Hz  
 FIDRES 0.315264 Hz  
 AQ 1.5859712 sec  
 RG 256  
 DW 48.400 usec  
 DE 10.00 usec  
 TE 296.0 K  
 D1 2.00000000 sec  
 TD0 1

===== CHANNEL f1 =====  
 NUC1 1H  
 P1 11.23 usec  
 PL1 1.00 dB  
 PL1W 19.75309753 W  
 SFO1 500.1560886 MHz

F2 - Processing parameters  
 SI 16384  
 SF 500.1530147 MHz  
 WDW EM  
 SSB 0  
 LB 0.30 Hz  
 GB 0  
 PC 1.00

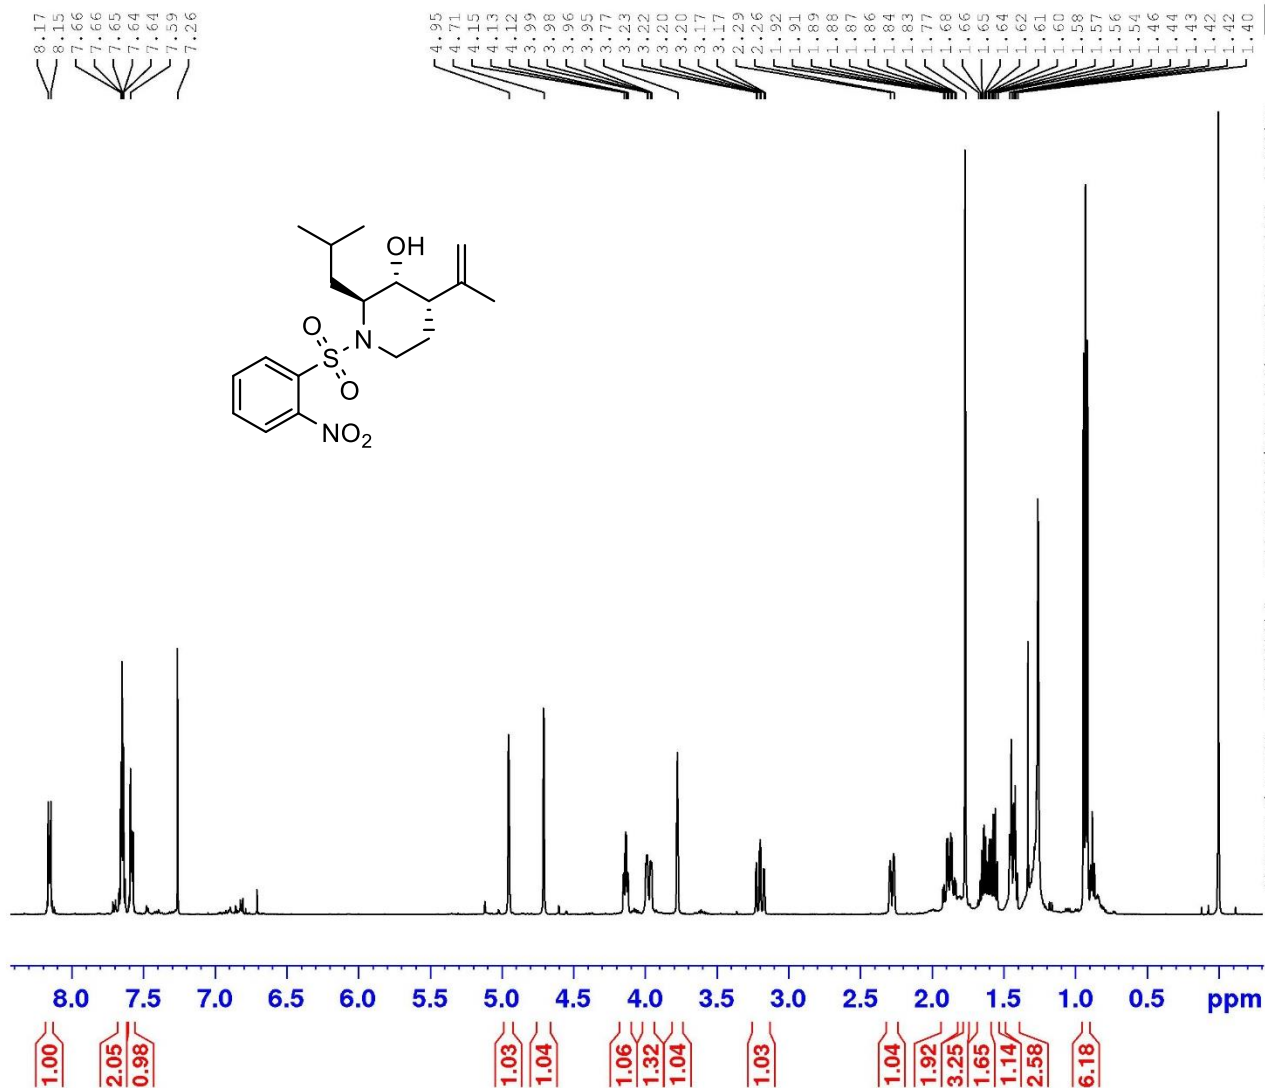

<sup>1</sup>H-NMR (R,S)-30c



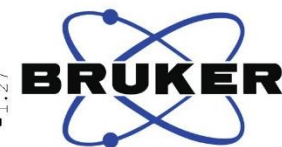

Current Data Parameters  
 NAME Jun25-2021  
 EXPNO 120  
 PROCNO 1

F2 - Acquisition Parameters  
 Date\_ 20210626  
 Time 16.26  
 INSTRUM spect  
 PROBHD 5 mm PABBO BB-  
 PULPROG zg30  
 TD 32768  
 SOLVENT CDCl3  
 NS 32  
 DS 0  
 SWH 10330.578 Hz  
 FIDRES 0.315264 Hz  
 AQ 1.5859712 sec  
 RG 287  
 DW 48.400 usec  
 DE 10.00 usec  
 TE 296.0 K  
 D1 2.00000000 sec  
 TDO 1

===== CHANNEL f1 =====  
 NUC1 1H  
 P1 11.23 usec  
 PL1 1.00 dB  
 PL1W 19.75309753 W  
 SFO1 500.1560886 MHz

F2 - Processing parameters  
 SI 16384  
 SF 500.1530175 MHz  
 WDW EM  
 SSB 0  
 LB 0.30 Hz  
 GB 0  
 PC 1.00

8.12  
7.67  
7.66  
7.66  
7.65  
7.59  
7.58  
7.57  
7.26

4.09  
4.02  
4.00  
3.99  
3.23  
3.22  
3.20  
3.19  
3.17  
3.16  
2.79  
1.94  
1.94  
1.93  
1.92  
1.91  
1.89  
1.88  
1.86  
1.85  
1.59  
1.58  
1.57  
1.55  
1.54  
1.53  
1.51  
1.50  
1.48  
1.48  
1.47  
1.45  
1.45  
1.44  
1.31  
1.30  
1.29  
1.27

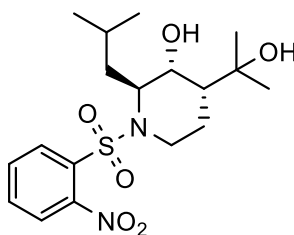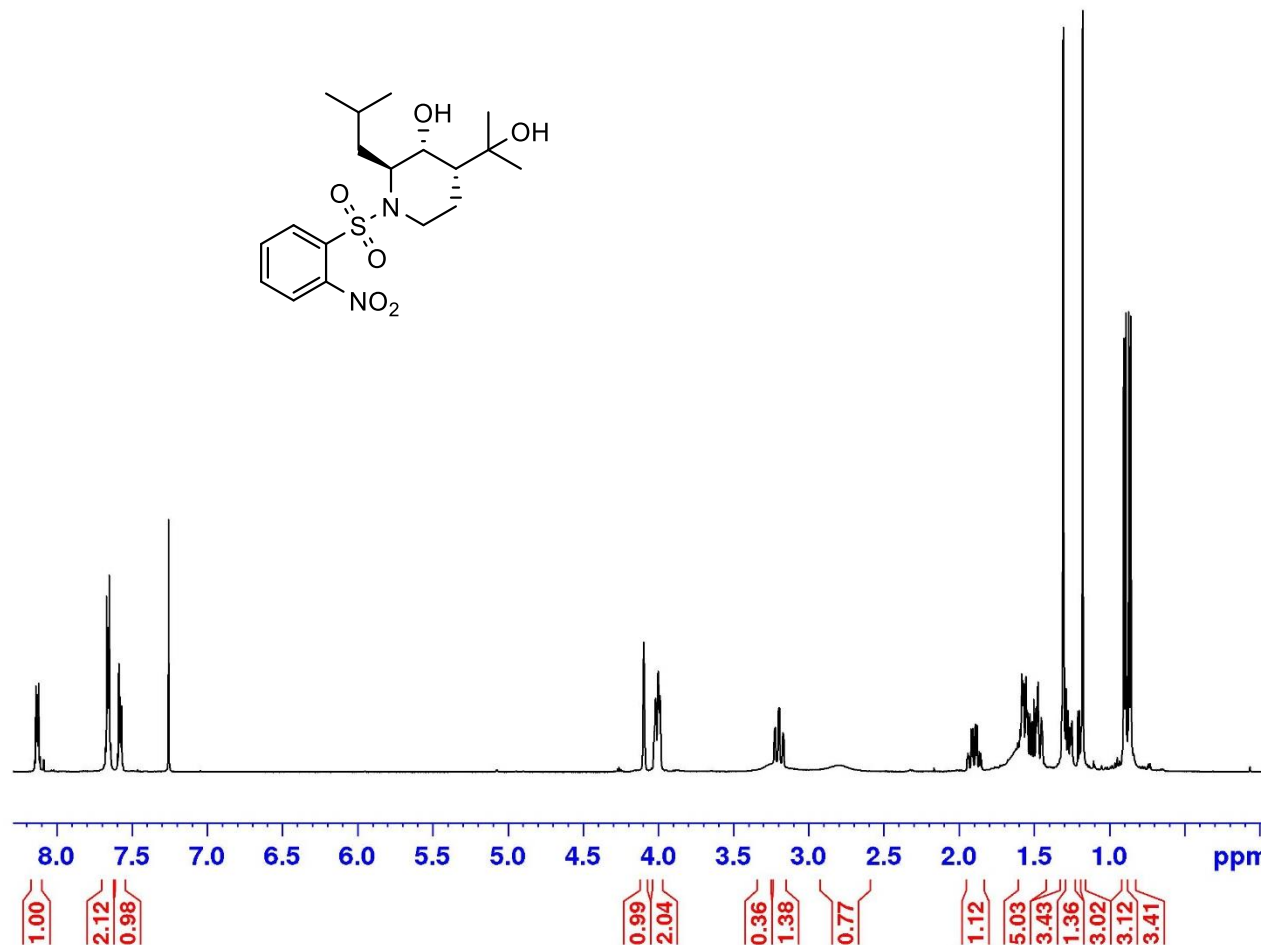

<sup>1</sup>H-NMR (*R,R*)-31c

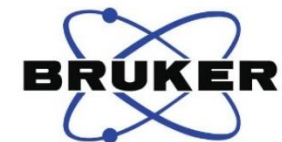

Current Data Parameters  
 NAME Jun25-2021  
 EXPNO 121  
 PROCNO 1

F2 - Acquisition Parameters  
 Date\_ 20210626  
 Time 17.20  
 INSTRUM spect  
 PROBHD 5 mm PABBO BB-  
 PULPROG zgpg30  
 TD 65536  
 SOLVENT CDCl3  
 NS 1024  
 DS 4  
 SWH 32894.738 Hz  
 FIDRES 0.501934 Hz  
 AQ 0.9961472 sec  
 RG 2580  
 DW 15.200 usec  
 DE 10.00 usec  
 TE 296.0 K  
 D1 2.0000000 sec  
 D11 0.03000000 sec  
 TD0 1

===== CHANNEL f1 =====  
 NUC1 13C  
 P1 10.20 usec  
 PL1 1.50 dB  
 PL1W 51.74793243 W  
 SFO1 125.7761482 MHz

===== CHANNEL f2 =====  
 CPDPRG[2] waltz16  
 NUC2 1H  
 PCPD2 100.00 usec  
 PL2 1.00 dB  
 PL12 19.99 dB  
 PL13 21.00 dB  
 PL2W 19.75309753 W  
 PL12W 0.24925002 W  
 PL13W 0.19753097 W  
 SFO2 500.1550006 MHz

F2 - Processing parameters  
 SI 32768  
 SF 125.7635720 MHz  
 WDW EM  
 SSB 0  
 LB 1.00 Hz  
 GB 0  
 PC 1.40

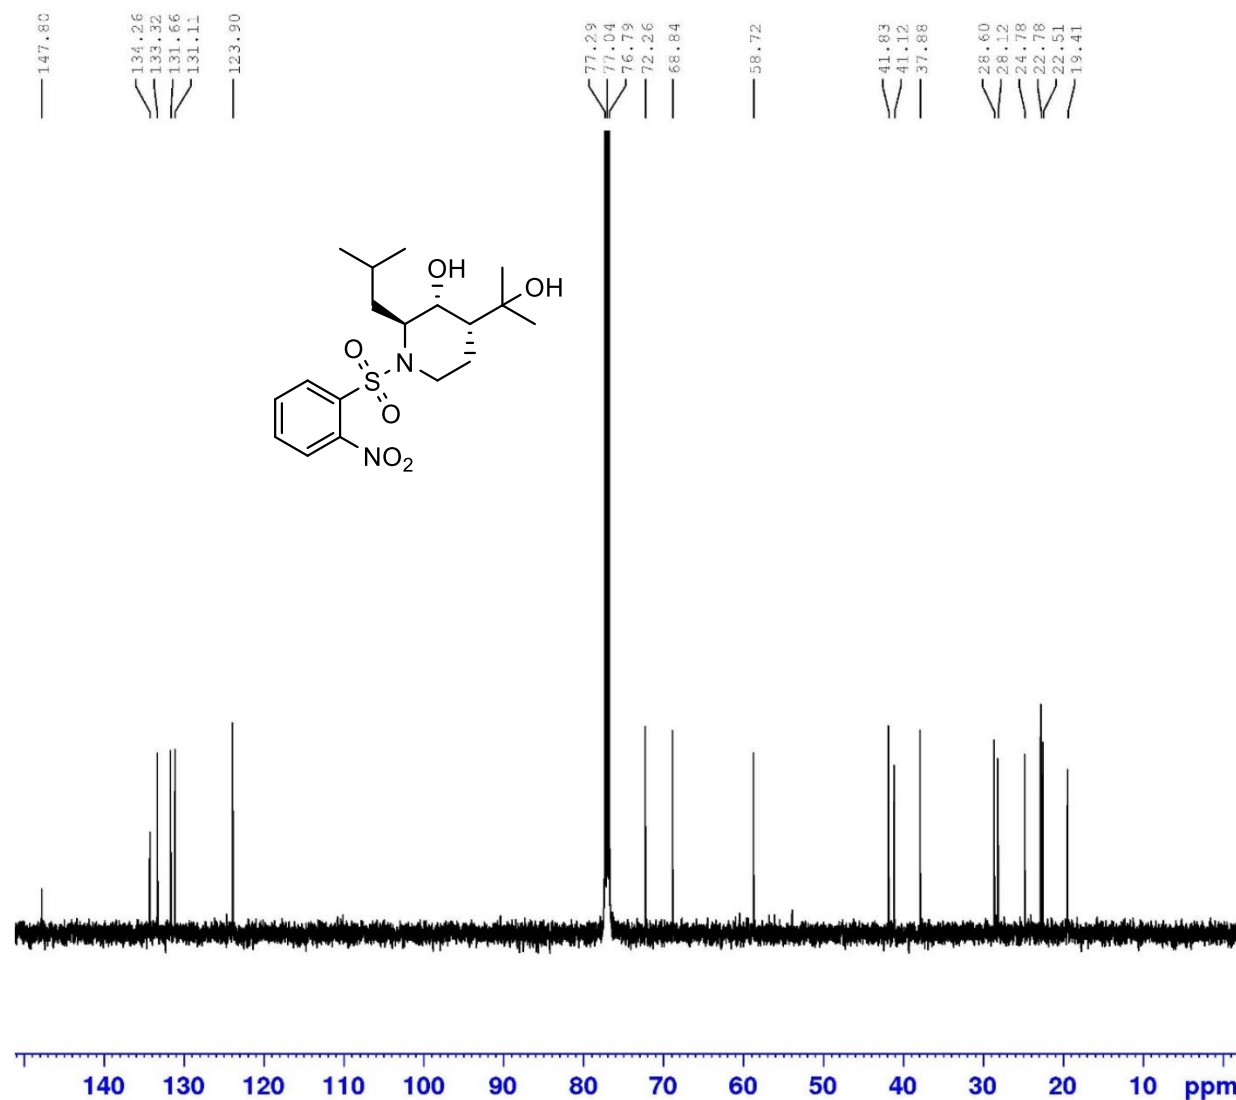

<sup>13</sup>C-NMR (R,R)-31c

8.11  
8.10  
7.69  
7.68  
7.68  
7.67  
7.64  
7.62  
7.26

4.24  
4.06  
4.05  
4.05  
4.04  
4.03  
3.91  
3.90  
3.89  
3.88  
3.87  
3.85  
3.84  
3.15  
3.15  
3.12  
3.10  
3.09  
2.59  
1.82  
1.81  
1.80  
1.79  
1.77  
1.77  
1.61  
1.61  
1.58  
1.56  
1.56  
1.55  
1.53  
1.53  
1.46  
1.45  
1.25  
1.20  
1.17  
1.16  
1.14  
1.13  
1.12

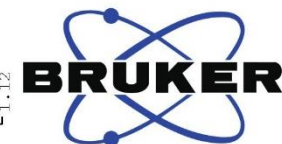

Current Data Parameters  
NAME Jun25-2021  
EXPNO 130  
PROCNO 1

F2 - Acquisition Parameters  
Date\_ 20210626  
Time 17.28  
INSTRUM spect  
PROBHD 5 mm PABBO BB-  
PULPROG zg30  
TD 32768  
SOLVENT CDCl3  
NS 32  
DS 0  
SWH 10330.578 Hz  
FIDRES 0.315264 Hz  
AQ 1.5859712 sec  
RG 456  
DW 48.400 usec  
DE 10.00 usec  
TE 296.0 K  
D1 2.00000000 sec  
TD0 1

===== CHANNEL f1 =====  
NUC1 1H  
P1 11.23 usec  
PL1 1.00 dB  
PL1W 19.75309753 W  
SFO1 500.1560886 MHz

F2 - Processing parameters  
SI 16384  
SF 500.1530161 MHz  
WDW EM  
SSB 0  
LB 0.30 Hz  
GB 0  
PC 1.00

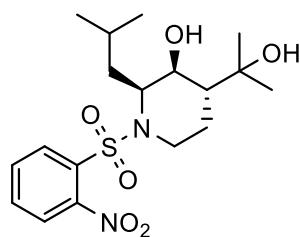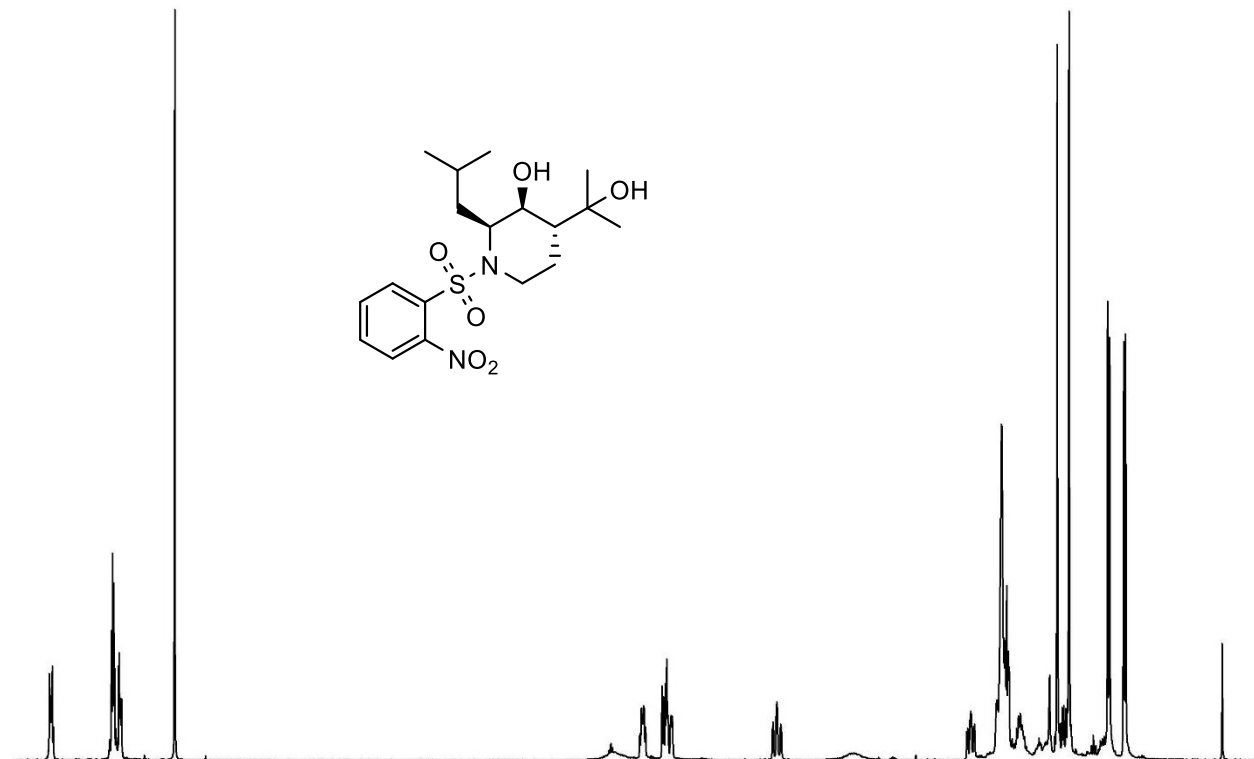

8.0 7.5 7.0 6.5 6.0 5.5 5.0 4.5 4.0 3.5 3.0 2.5 2.0 1.5 1.0 0.5 ppm

1.00 1.86 0.96 0.78 0.99 1.86 0.95 0.63 0.95 7.22 1.36 2.73 0.99 2.73 3.09 2.82

<sup>1</sup>H-NMR (*S,R*)-31c

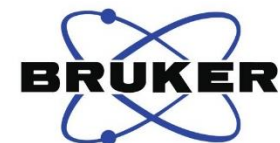

Current Data Parameters  
 NAME Jun25-2021  
 EXPNO 131  
 PROCNO 1

F2 - Acquisition Parameters  
 Date\_ 20210626  
 Time 18.21  
 INSTRUM spect  
 PROBHD 5 mm PABBO BB-  
 PULPROG zgpg30  
 TD 65536  
 SOLVENT CDCl3  
 NS 1024  
 DS 4  
 SWH 32894.738 Hz  
 FIDRES 0.501934 Hz  
 AQ 0.9961472 sec  
 RG 2580  
 DW 15.200 usec  
 DE 10.00 usec  
 TE 296.0 K  
 D1 2.0000000 sec  
 D11 0.03000000 sec  
 TD0 1

===== CHANNEL f1 =====  
 NUC1 13C  
 P1 10.20 usec  
 PL1 1.50 dB  
 PL1W 51.74793243 W  
 SFO1 125.7761482 MHz

===== CHANNEL f2 =====  
 CPDPRG[2] waltz16  
 NUC2 1H  
 PCPD2 100.00 usec  
 PL2 1.00 dB  
 PL12 19.99 dB  
 PL13 21.00 dB  
 PL2W 19.75309753 W  
 PL12W 0.24925002 W  
 PL13W 0.19753097 W  
 SFO2 500.1550006 MHz

F2 - Processing parameters  
 SI 32768  
 SF 125.7635720 MHz  
 WDW EM  
 SSB 0  
 LB 1.00 Hz  
 GB 0  
 PC 1.40

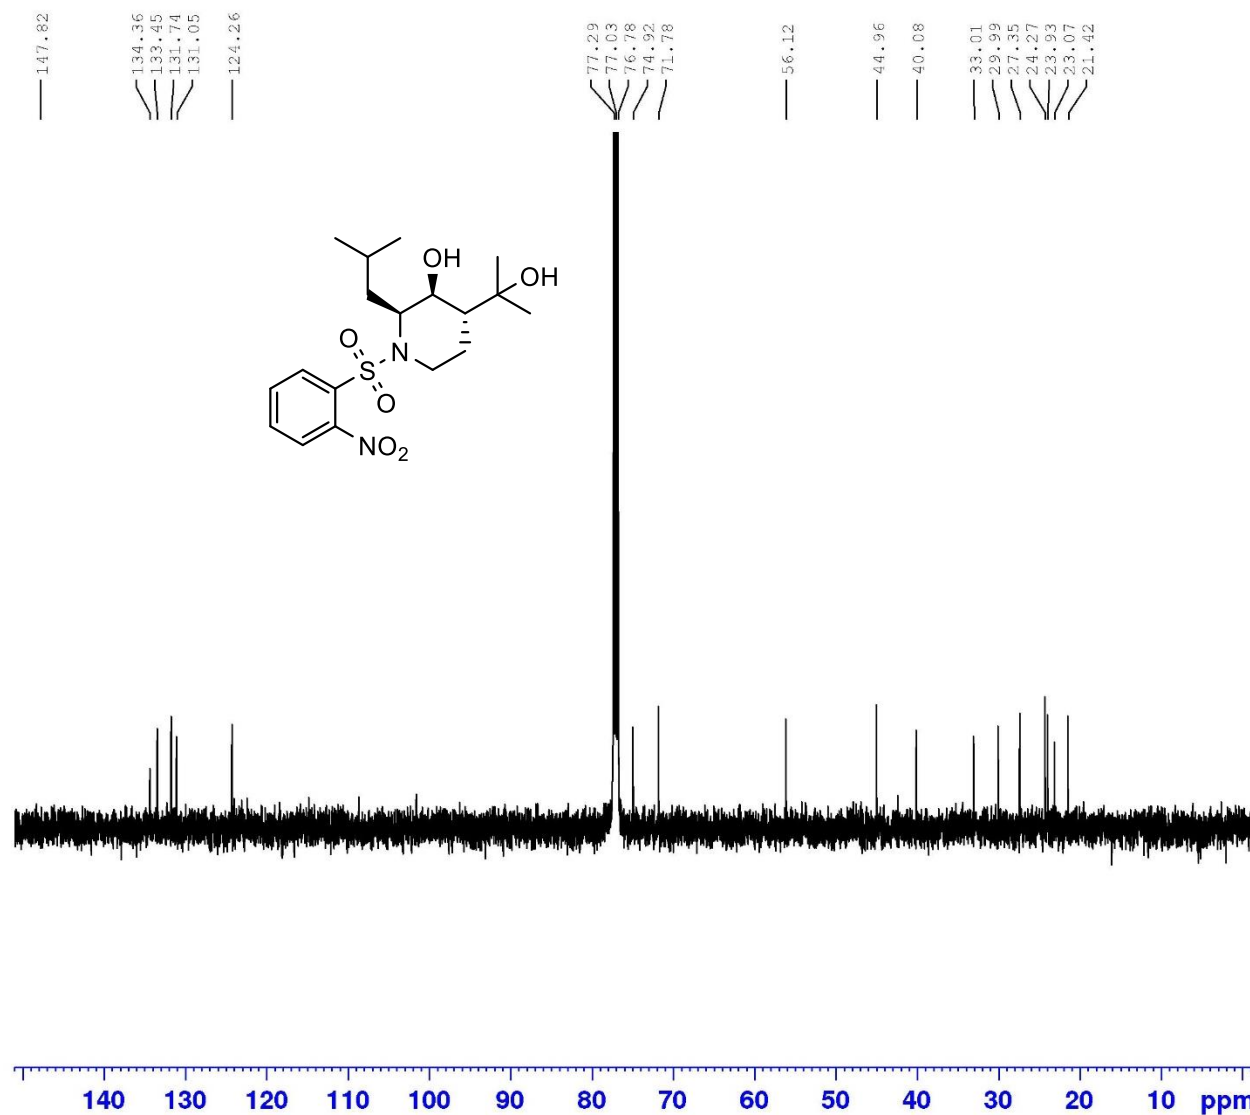

<sup>13</sup>C-NMR (S,R)-31c

7.70  
7.69  
7.69  
7.68  
7.67  
7.66  
7.66  
7.65  
7.65  
7.64  
7.63  
7.62  
7.26

4.91  
4.67  
4.39  
4.38  
4.09  
4.09  
4.08  
4.06  
3.59  
3.57  
3.56  
3.55  
3.54  
3.54  
3.53  
3.23  
3.21  
3.20  
1.97  
1.96  
1.95  
1.94  
1.93  
1.92  
1.73  
1.71  
1.70  
1.68  
1.63  
1.61  
1.61  
1.60  
1.60  
1.59  
1.58  
1.57  
1.55  
0.95  
0.94  
0.92  
0.88

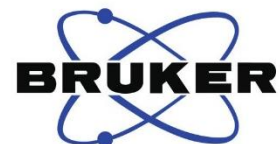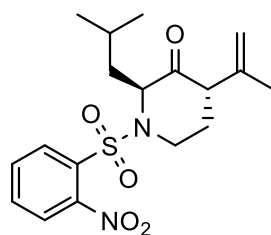

Current Data Parameters  
NAME Apr23-2020  
EXPNO 80  
PROCNO 1

F2 - Acquisition Parameters  
Date\_ 20200424  
Time 0.26  
INSTRUM spect  
PROBHD 5 mm PABBO BB-  
PULPROG zg30  
TD 32768  
SOLVENT CDCl3  
NS 32  
DS 0  
SWH 10330.578 Hz  
FIDRES 0.315264 Hz  
AQ 1.5859712 sec  
RG 362  
DW 48.400 usec  
DE 10.00 usec  
TE 300.0 K  
D1 2.00000000 sec  
TD0 1

----- CHANNEL f1 -----  
NUC1 1H  
P1 11.23 usec  
PL1 1.00 dB  
PL1W 19.75309753 W  
SFO1 500.1560886 MHz

F2 - Processing parameters  
SI 65536  
SF 500.1530147 MHz  
WDW no  
SSB 0  
LB 0 Hz  
GB 0  
PC 1.00

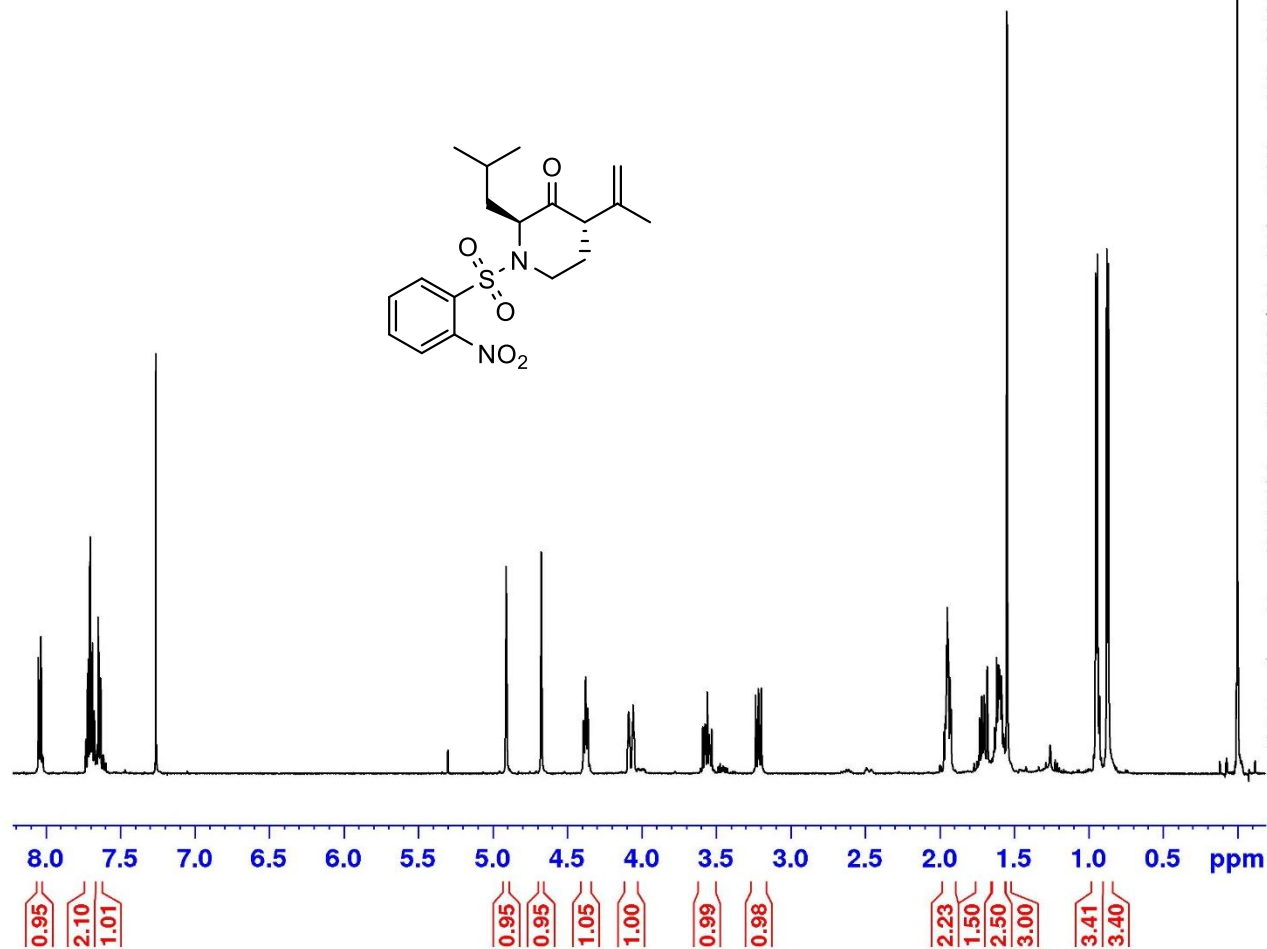

<sup>1</sup>H-NMR (S)-S2c

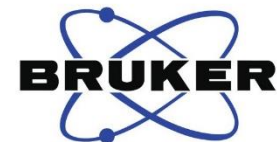

Current Data Parameters  
 NAME Apr23-2020  
 EXPNO 81  
 PROCNO 1

F2 - Acquisition Parameters  
 Date\_ 20200424  
 Time 1.20  
 INSTRUM spect  
 PROBHD 5 mm PABBO BB-  
 PULPROG zgpg30  
 TD 65536  
 SOLVENT CDCl3  
 NS 1024  
 DS 4  
 SWH 32894.738 Hz  
 FIDRES 0.501934 Hz  
 AQ 0.9961472 sec  
 RG 2580  
 DW 15.200 usec  
 DE 10.00 usec  
 TE 296.0 K  
 D1 2.00000000 sec  
 D11 0.03000000 sec  
 TD0 1

===== CHANNEL f1 =====  
 NUC1 13C  
 P1 10.20 usec  
 PL1 1.50 dB  
 PL1W 51.74793243 W  
 SFO1 125.7761482 MHz

===== CHANNEL f2 =====  
 CPDPRG[2] waltz16  
 NUC2 1H  
 PCPD2 100.00 usec  
 PL2 1.00 dB  
 PL12 19.99 dB  
 PL13 21.00 dB  
 PL2W 19.75309753 W  
 PL12W 0.24925002 W  
 PL13W 0.19753097 W  
 SFO2 500.1550006 MHz

F2 - Processing parameters  
 SI 32768  
 SF 125.7635738 MHz  
 WDW EM  
 SSB 0  
 LB 1.00 Hz  
 GB 0  
 PC 1.40

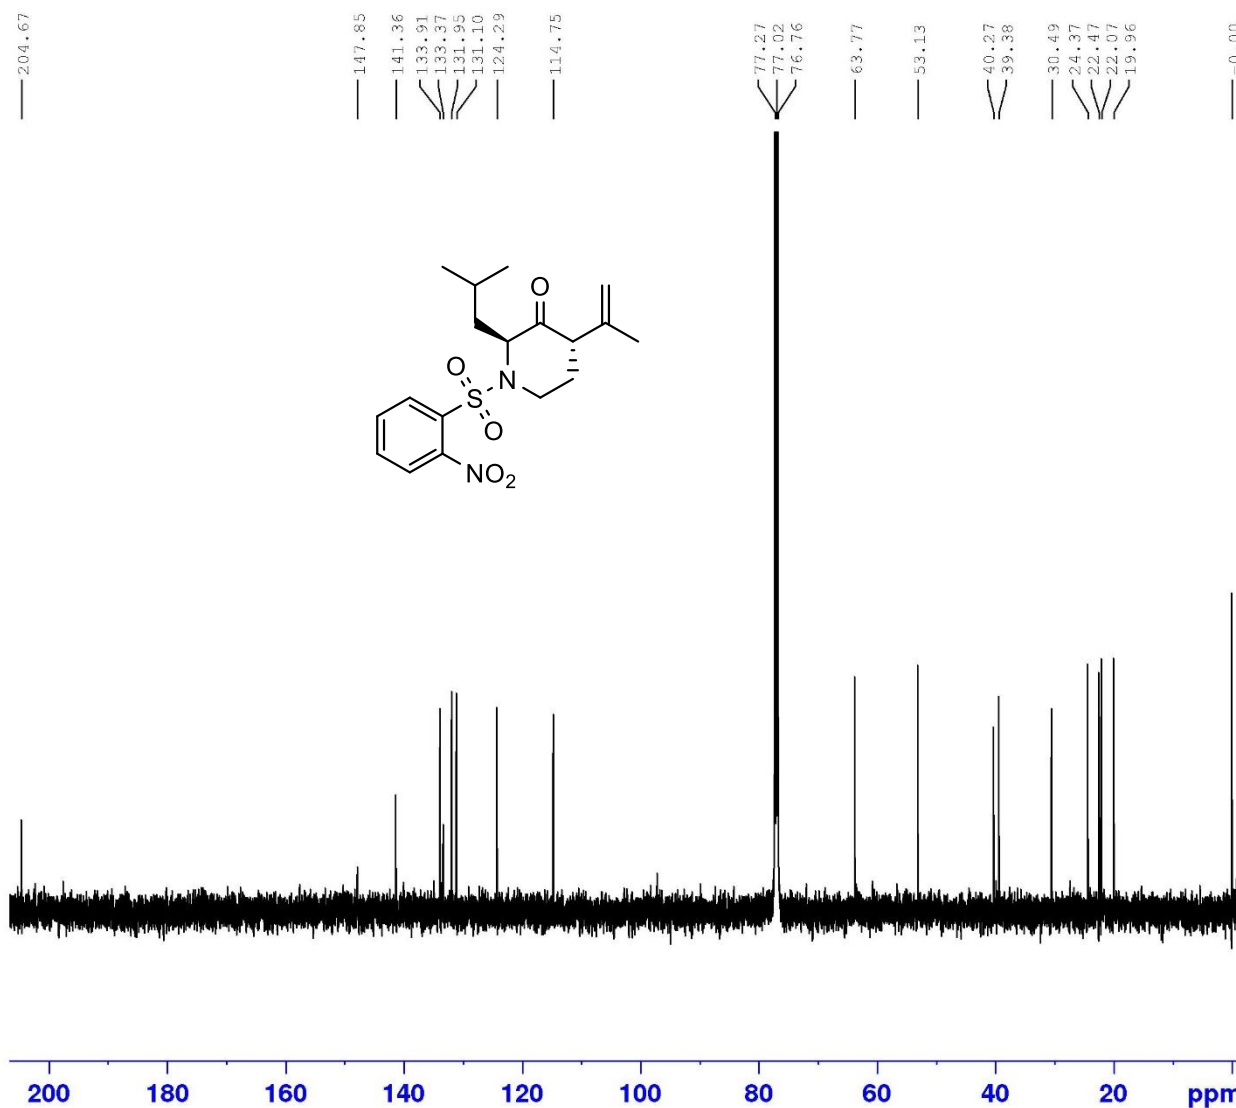

<sup>13</sup>C-NMR (S)-S2c

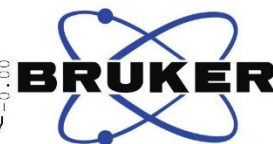

Current Data Parameters  
NAME Jun17-2021  
EXPNO 30  
PROCNO 1

F2 - Acquisition Parameters  
Date\_ 20210617  
Time 15.23  
INSTRUM spect  
PROBHD 5 mm PABBO BB-  
PULPROG zg30  
TD 32768  
SOLVENT CDCl3  
NS 32  
DS 0  
SWH 10330.578 Hz  
FIDRES 0.315264 Hz  
AQ 1.5859712 sec  
RG 456  
DW 48.400 usec  
DE 10.00 usec  
TE 296.0 K  
D1 2.00000000 sec  
TD0 1

===== CHANNEL f1 =====  
NUC1 1H  
P1 11.23 usec  
PL1 1.00 dB  
PL1W 19.75309753 W  
SFO1 500.1560886 MHz

F2 - Processing parameters  
SI 16384  
SF 500.1530164 MHz  
WDW EM  
SSB 0  
LB 0.30 Hz  
GB 0  
PC 1.00

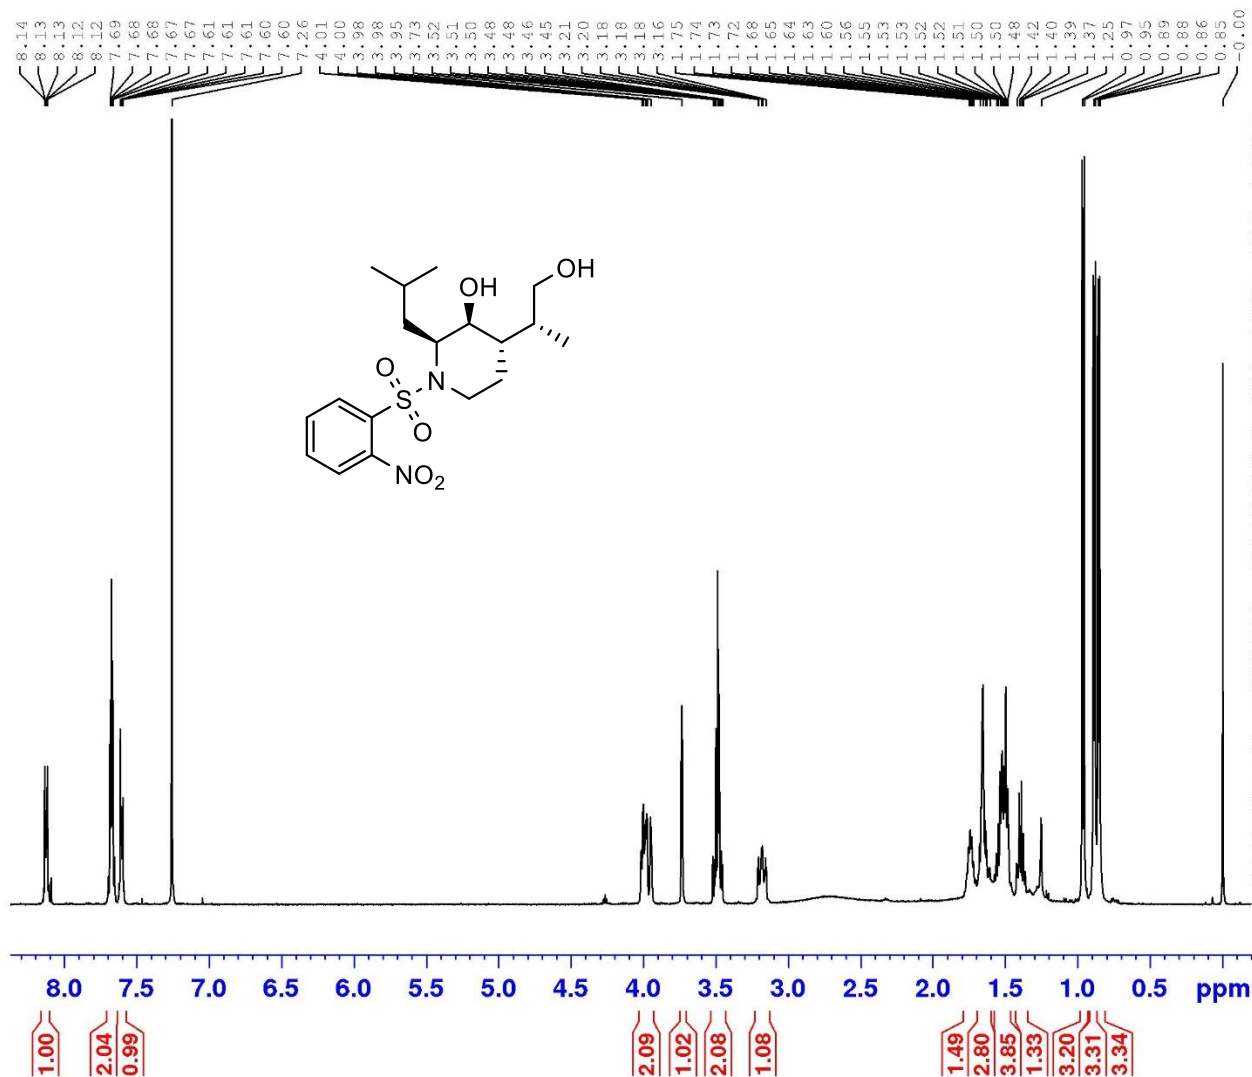

<sup>1</sup>H-NMR (S,S,R)-34c

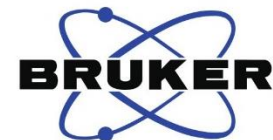

Current Data Parameters  
 NAME Jun17-2021  
 EXPNO 31  
 PROCNO 1

F2 - Acquisition Parameters  
 Date\_ 20210617  
 Time 16.16  
 INSTRUM spect  
 PROBHD 5 mm PABBO BB-  
 PULPROG zgpg30  
 TD 65536  
 SOLVENT CDCl3  
 NS 1024  
 DS 4  
 SWH 32894.738 Hz  
 FIDRES 0.501934 Hz  
 AQ 0.9961472 sec  
 RG 2300  
 DW 15.200 usec  
 DE 10.00 usec  
 TE 296.0 K  
 D1 2.00000000 sec  
 D11 0.03000000 sec  
 TD0 1

===== CHANNEL f1 =====  
 NUC1 13C  
 P1 10.20 usec  
 PL1 1.50 dB  
 PL1W 51.74793243 W  
 SFO1 125.7761482 MHz

===== CHANNEL f2 =====  
 CPDPRG[2] waltz16  
 NUC2 1H  
 PCPD2 100.00 usec  
 PL2 1.00 dB  
 PL12 19.99 dB  
 PL13 21.00 dB  
 PL2W 19.75309753 W  
 PL12W 0.24925002 W  
 PL13W 0.19753097 W  
 SFO2 500.1550006 MHz

F2 - Processing parameters  
 SI 32768  
 SF 125.7635720 MHz  
 WDW EM  
 SSB 0  
 LB 1.00 Hz  
 GB 0  
 PC 1.40

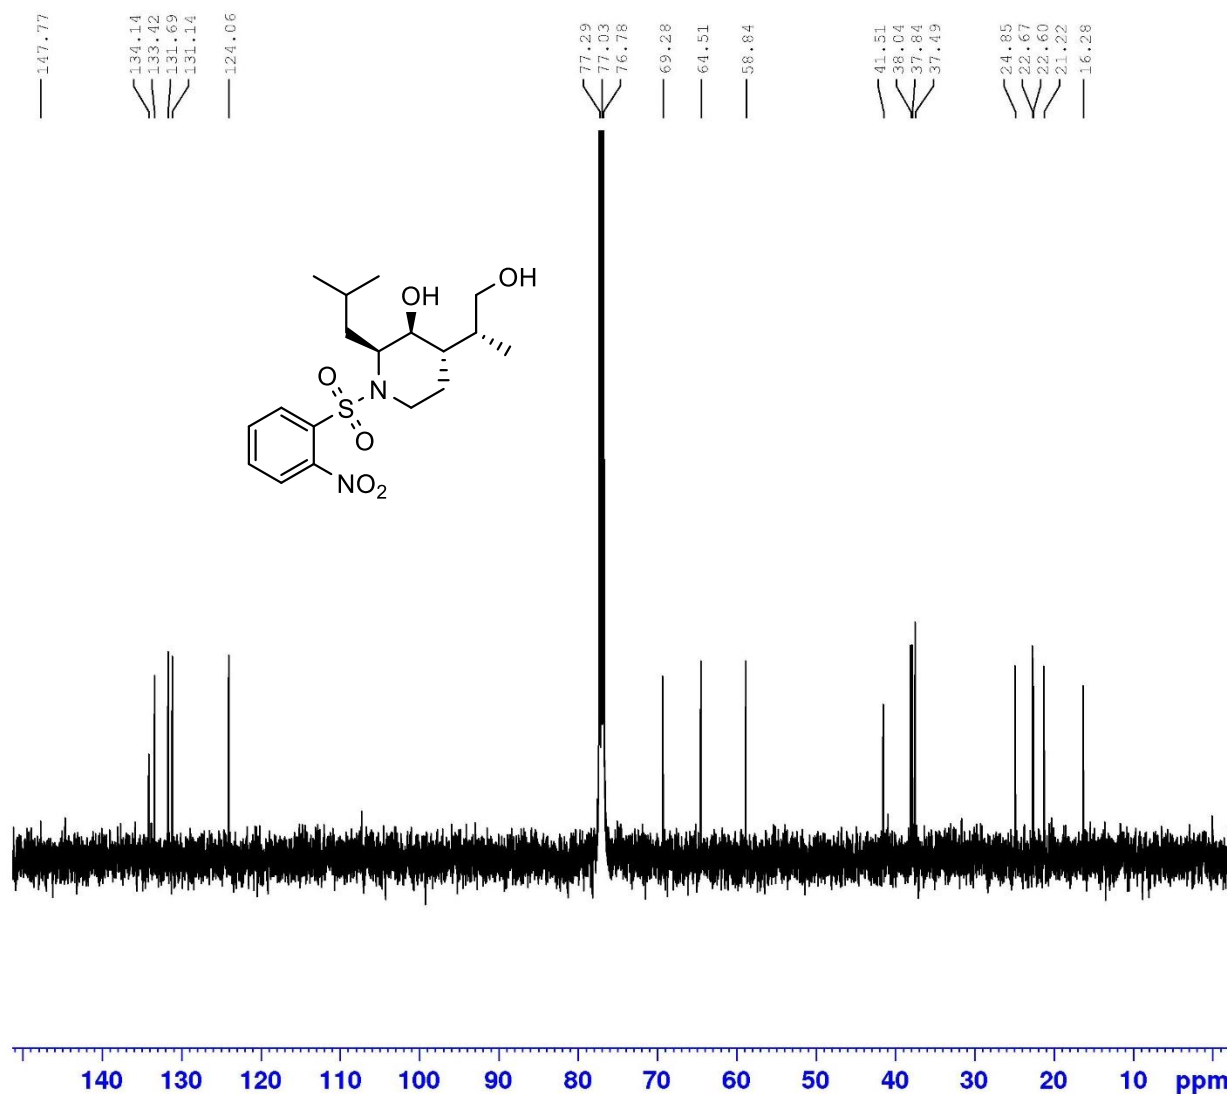

<sup>13</sup>C-NMR (*S,S,R*)-34c

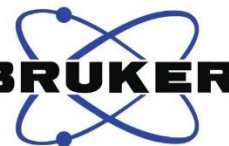

Current Data Parameters  
 NAME Aug18-2021  
 EXPNO 90  
 PROCNO 1

F2 - Acquisition Parameters  
 Date\_ 20210819  
 Time 4.45  
 INSTRUM spect  
 PROBHD 5 mm PABBO BB-  
 PULPROG zg30  
 TD 32768  
 SOLVENT CDCl3  
 NS 32  
 DS 0  
 SWH 10330.578 Hz  
 FIDRES 0.315264 Hz  
 AQ 1.5859712 sec  
 RG 724  
 DW 48.400 usec  
 DE 10.00 usec  
 TE 296.0 K  
 D1 2.00000000 sec  
 TD0 1

===== CHANNEL f1 =====  
 NUC1 1H  
 P1 11.23 usec  
 PL1 1.00 dB  
 PL1W 19.75309753 W  
 SFO1 500.1560886 MHz

F2 - Processing parameters  
 SI 16384  
 SF 500.1530159 MHz  
 WDW EM  
 SSB 0  
 LB 0.30 Hz  
 GB 0  
 PC 1.00

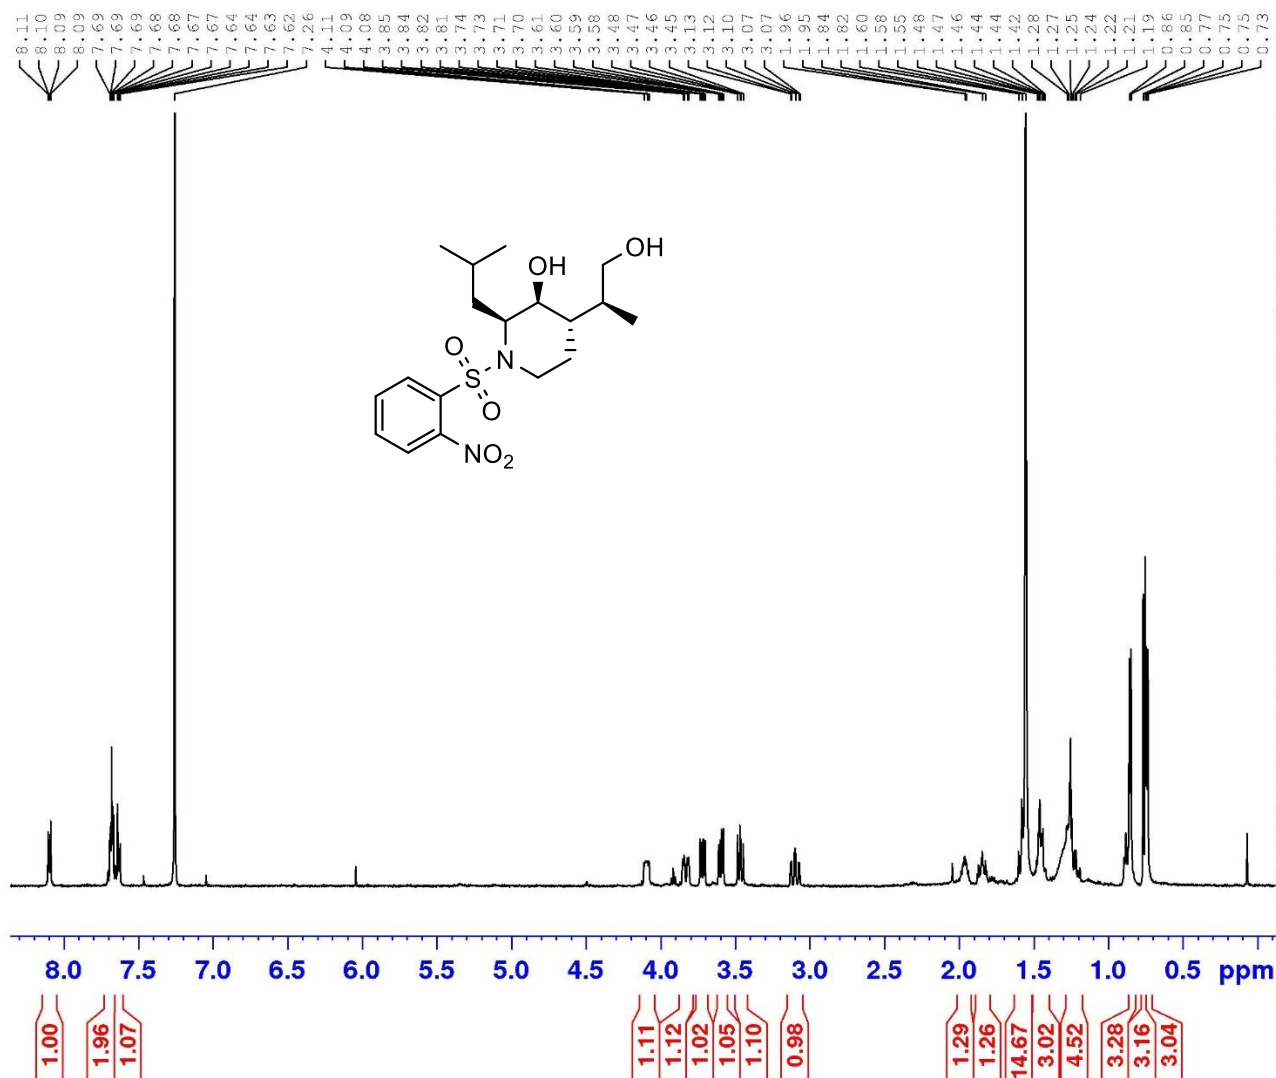

<sup>1</sup>H-NMR (S,S,S)-34c

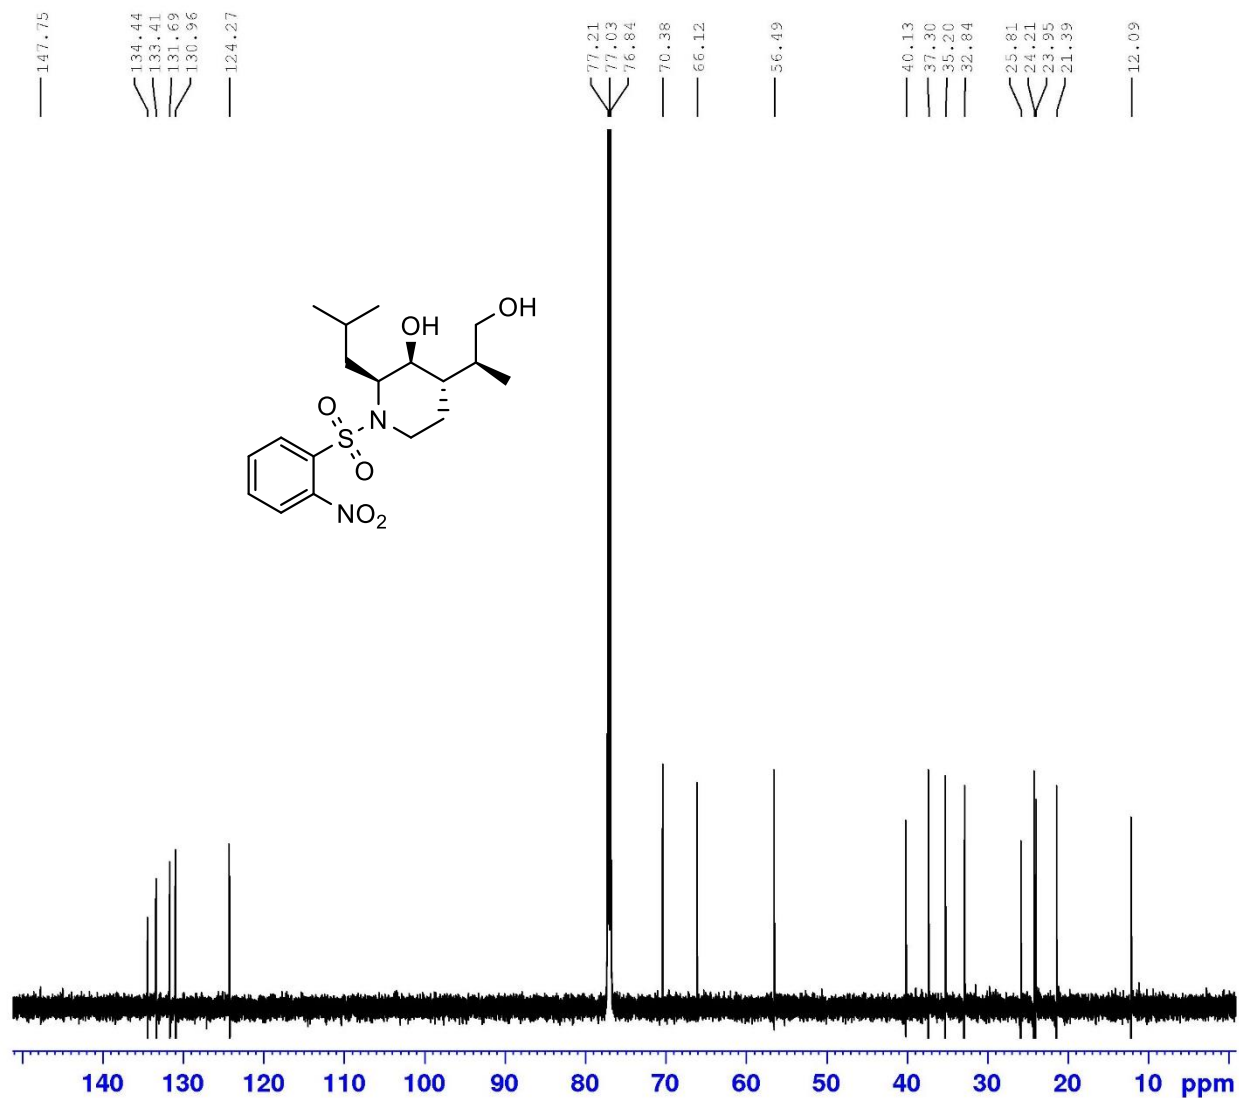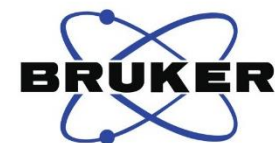

Current Data Parameters  
NAME Jun23-2021  
EXPNO 41  
PROCNO 1

F2 - Acquisition Parameters  
Date\_ 20210623  
Time 11.54  
INSTRUM spect  
PROBHD 5 mm CPQCI 1H-  
PULPROG zgpg30  
TD 65356  
SOLVENT CDCl3  
NS 2048  
DS 4  
SWH 40760.871 Hz  
FIDRES 0.623675 Hz  
AQ 0.8017003 sec  
RG 182.53  
DW 12.267 usec  
DE 18.00 usec  
TE 298.0 K  
D1 2.00000000 sec  
D11 0.03000000 sec  
TD0 1

===== CHANNEL f1 =====  
SFO1 176.1232717 MHz  
NUC1 13C  
P1 12.00 usec  
PLW1 105.00000000 W

===== CHANNEL f2 =====  
SFO2 700.3628014 MHz  
NUC2 1H  
CPDPRG[2] waltz16  
PCPD2 65.00 usec  
PLW2 9.89999962 W  
PLW12 0.15564001 W  
PLW13 0.07837200 W

F2 - Processing parameters  
SI 131072  
SF 176.1056620 MHz  
WDW no  
SSB 0  
LB 0 Hz  
GB 0  
PC 1.40

<sup>13</sup>C-NMR (S,S,S)-34c

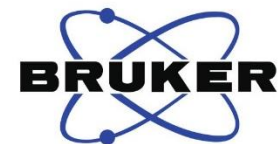

Current Data Parameters  
NAME Oct13-2020  
EXPNO 60  
PROCNO 1

F2 - Acquisition Parameters  
Date\_ 20201013  
Time 13.40  
INSTRUM spect  
PROBHD 5 mm PABBO BB-  
PULPROG zg30  
TD 32768  
SOLVENT D2O  
NS 32  
DS 0  
SWH 10330.578 Hz  
FIDRES 0.315264 Hz  
AQ 1.5859712 sec  
RG 90.3  
DW 48.400 usec  
DE 10.00 usec  
TE 296.0 K  
D1 2.00000000 sec  
TDO 1

===== CHANNEL f1 =====  
NUC1 1H  
P1 11.23 usec  
PL1 1.00 dB  
PL1W 19.75309753 W  
SFO1 500.1560886 MHz

F2 - Processing parameters  
SI 16384  
SF 500.1529587 MHz  
WDW EM  
SSB 0  
LB 0.30 Hz  
GB 0  
PC 1.00

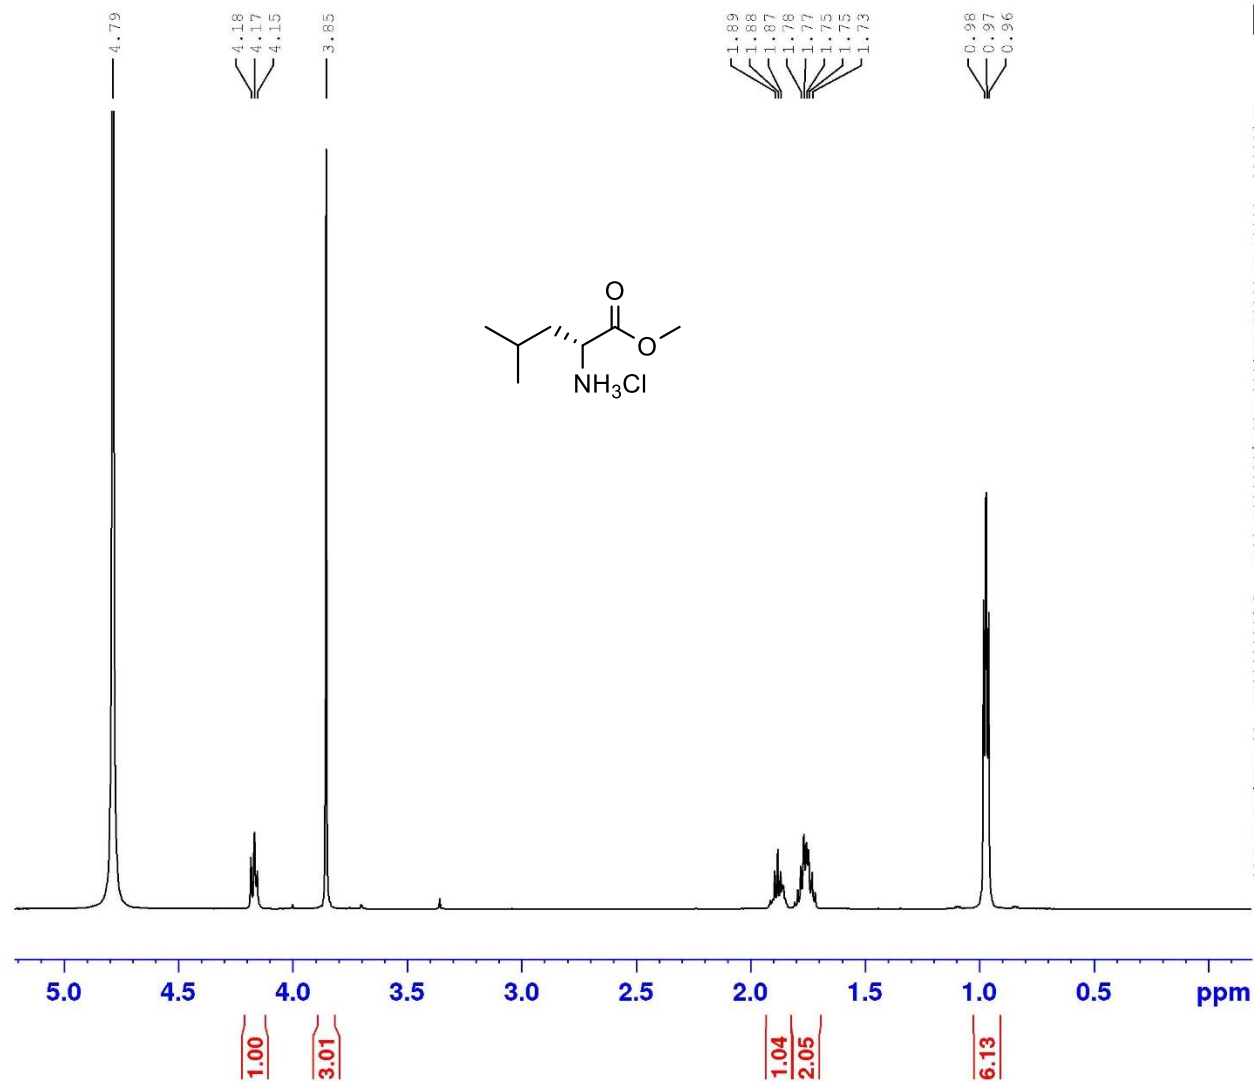

<sup>1</sup>H-NMR 25d

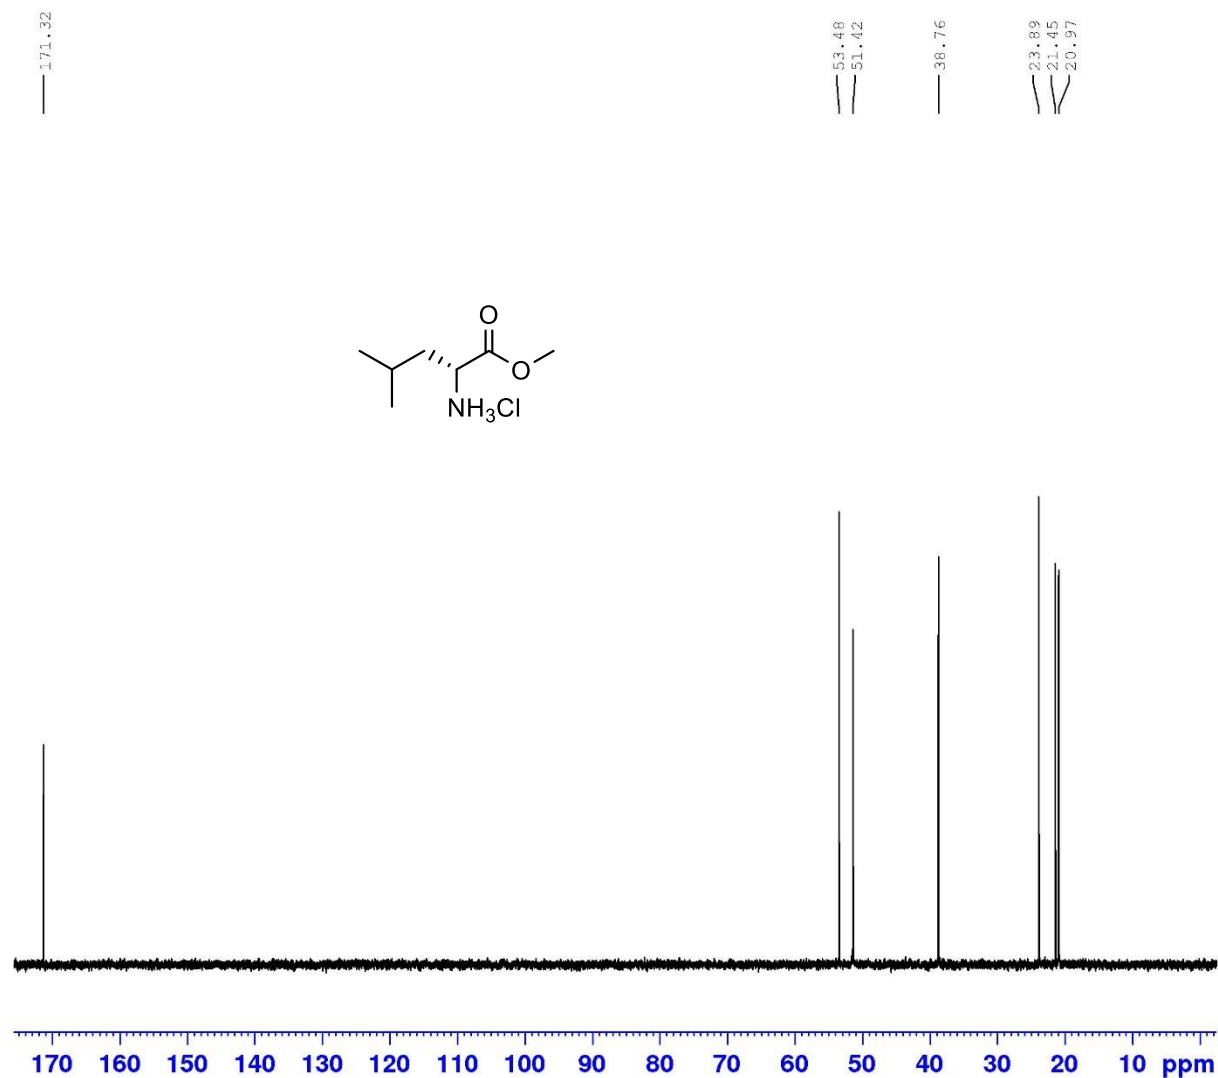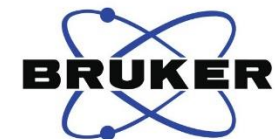

Current Data Parameters  
 NAME Oct13-2020  
 EXPNO 61  
 PROCNO 1

F2 - Acquisition Parameters  
 Date\_ 20201013  
 Time 14.34  
 INSTRUM spect  
 PROBHD 5 mm PABBO BB-  
 PULPROG zgpg30  
 TD 65536  
 SOLVENT D2O  
 NS 1024  
 DS 4  
 SWH 32894.738 Hz  
 FIDRES 0.501934 Hz  
 AQ 0.9961472 sec  
 RG 2580  
 DW 15.200 usec  
 DE 10.00 usec  
 TE 296.0 K  
 D1 2.00000000 sec  
 D11 0.03000000 sec  
 TD0 1

===== CHANNEL f1 =====  
 NUC1 13C  
 P1 10.20 usec  
 PL1 1.50 dB  
 PL1W 51.74793243 W  
 SFO1 125.7761482 MHz

===== CHANNEL f2 =====  
 CPDPRG2 waltz16  
 NUC2 1H  
 PCPD2 100.00 usec  
 PL2 1.00 dB  
 PL12 19.99 dB  
 PL13 21.00 dB  
 PL2W 19.75309753 W  
 PL12W 0.24925002 W  
 PL13W 0.19753097 W  
 SFO2 500.1550006 MHz

F2 - Processing parameters  
 SI 32768  
 SF 125.7635720 MHz  
 WDW EM  
 SSB 0  
 LB 1.00 Hz  
 GB 0  
 PC 1.40

<sup>13</sup>C-NMR 25d

7.93  
7.92  
7.92  
7.92  
7.91  
7.74  
7.73  
7.72  
7.71  
7.26

5.97  
5.95

4.23  
4.21  
4.21  
4.21  
4.20  
4.19  
4.18  
4.13  
4.12  
4.10  
4.09  
3.40

2.03  
1.84  
1.83  
1.81  
1.80  
1.64  
1.61  
1.60  
1.59  
1.58  
1.26  
1.25  
1.23  
0.94  
0.93

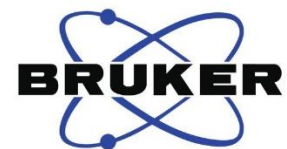

Current Data Parameters  
NAME Oct13-2020  
EXPNO 70  
PROCNO 1

F2 - Acquisition Parameters  
Date\_ 20201013  
Time 14.46  
INSTRUM spect  
PROBHD 5 mm PABBO BB-  
PULPROG zg30  
TD 32768  
SOLVENT CDCl3  
NS 32  
DS 0  
SWH 10330.578 Hz  
FIDRES 0.315264 Hz  
AQ 1.5859712 sec  
RG 144  
DW 48.400 usec  
DE 10.00 usec  
TE 296.0 K  
D1 2.00000000 sec  
TD0 1

===== CHANNEL f1 =====  
NUC1 1H  
P1 11.23 usec  
PL1 1.00 dB  
PL1W 19.75309753 W  
SFO1 500.1560886 MHz

F2 - Processing parameters  
SI 16384  
SF 500.1530159 MHz  
WDW EM  
SSB 0  
LB 0.30 Hz  
GB 0  
PC 1.00

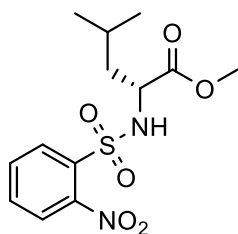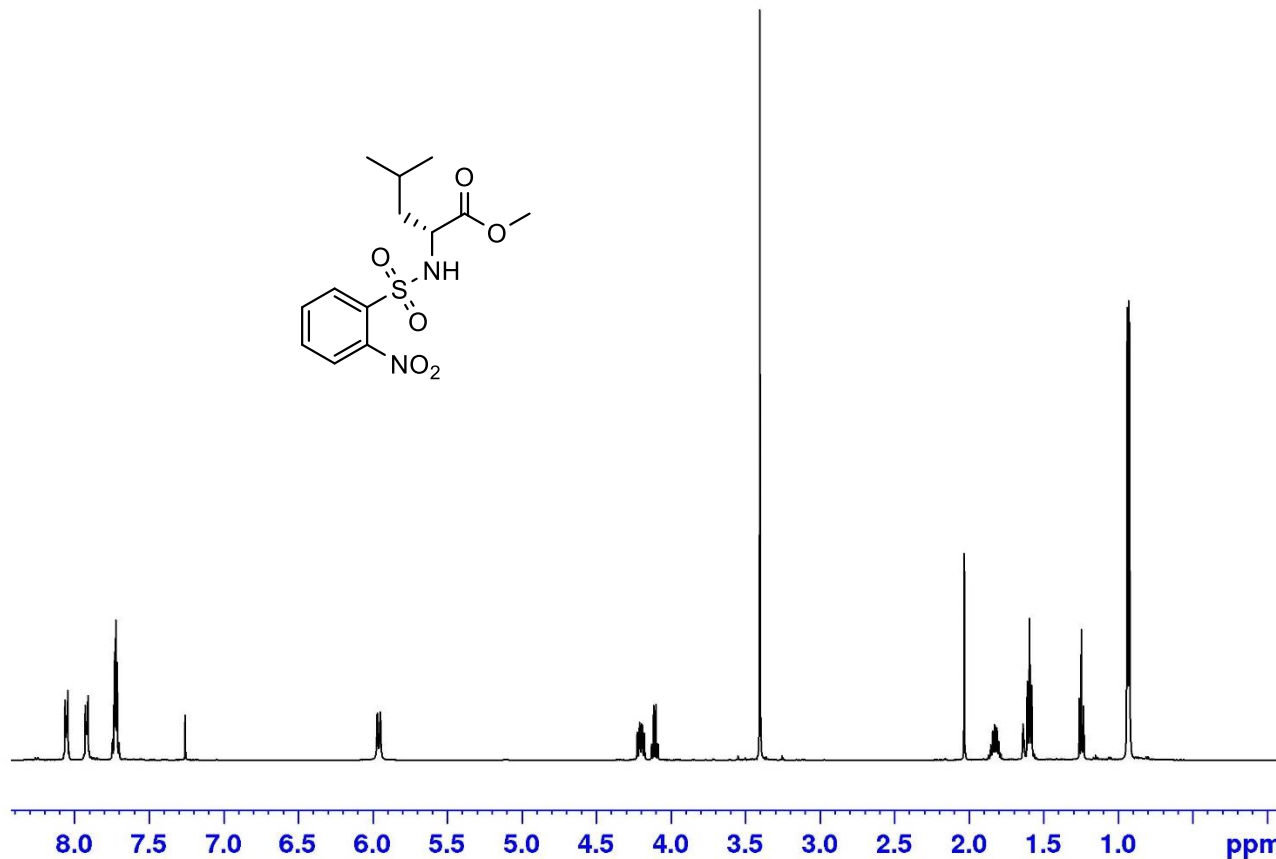

1.00  
1.01  
2.04

1.00

1.03

3.08

1.03

2.04

6.30

<sup>1</sup>H-NMR 26d

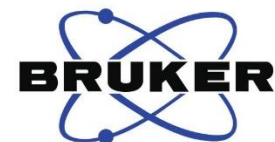

Current Data Parameters  
 NAME Oct13-2020  
 EXPNO 71  
 PROCNO 1

F2 - Acquisition Parameters  
 Date\_ 20201013  
 Time 15.40  
 INSTRUM spect  
 PROBHD 5 mm PABBO BB-  
 PULPROG zgpg30  
 TD 65536  
 SOLVENT CDCl3  
 NS 1024  
 DS 4  
 SWH 32894.738 Hz  
 FIDRES 0.501934 Hz  
 AQ 0.9961472 sec  
 RG 2580  
 DW 15.200 usec  
 DE 10.00 usec  
 TE 296.0 K  
 D1 2.00000000 sec  
 D11 0.03000000 sec  
 TD0 1

===== CHANNEL f1 =====  
 NUC1 13C  
 P1 10.20 usec  
 PL1 1.50 dB  
 PL1W 51.74793243 W  
 SFO1 125.7761482 MHz

===== CHANNEL f2 =====  
 CPDPRG[2] waltz16  
 NUC2 1H  
 PCPD2 100.00 usec  
 PL2 1.00 dB  
 PL12 19.99 dB  
 PL13 21.00 dB  
 PL2W 19.75309753 W  
 PL12W 0.24925002 W  
 PL13W 0.19753097 W  
 SFO2 500.1550006 MHz

F2 - Processing parameters  
 SI 32768  
 SF 125.7635720 MHz  
 WDW EM  
 SSB 0  
 LB 1.00 Hz  
 GB 0  
 PC 1.40

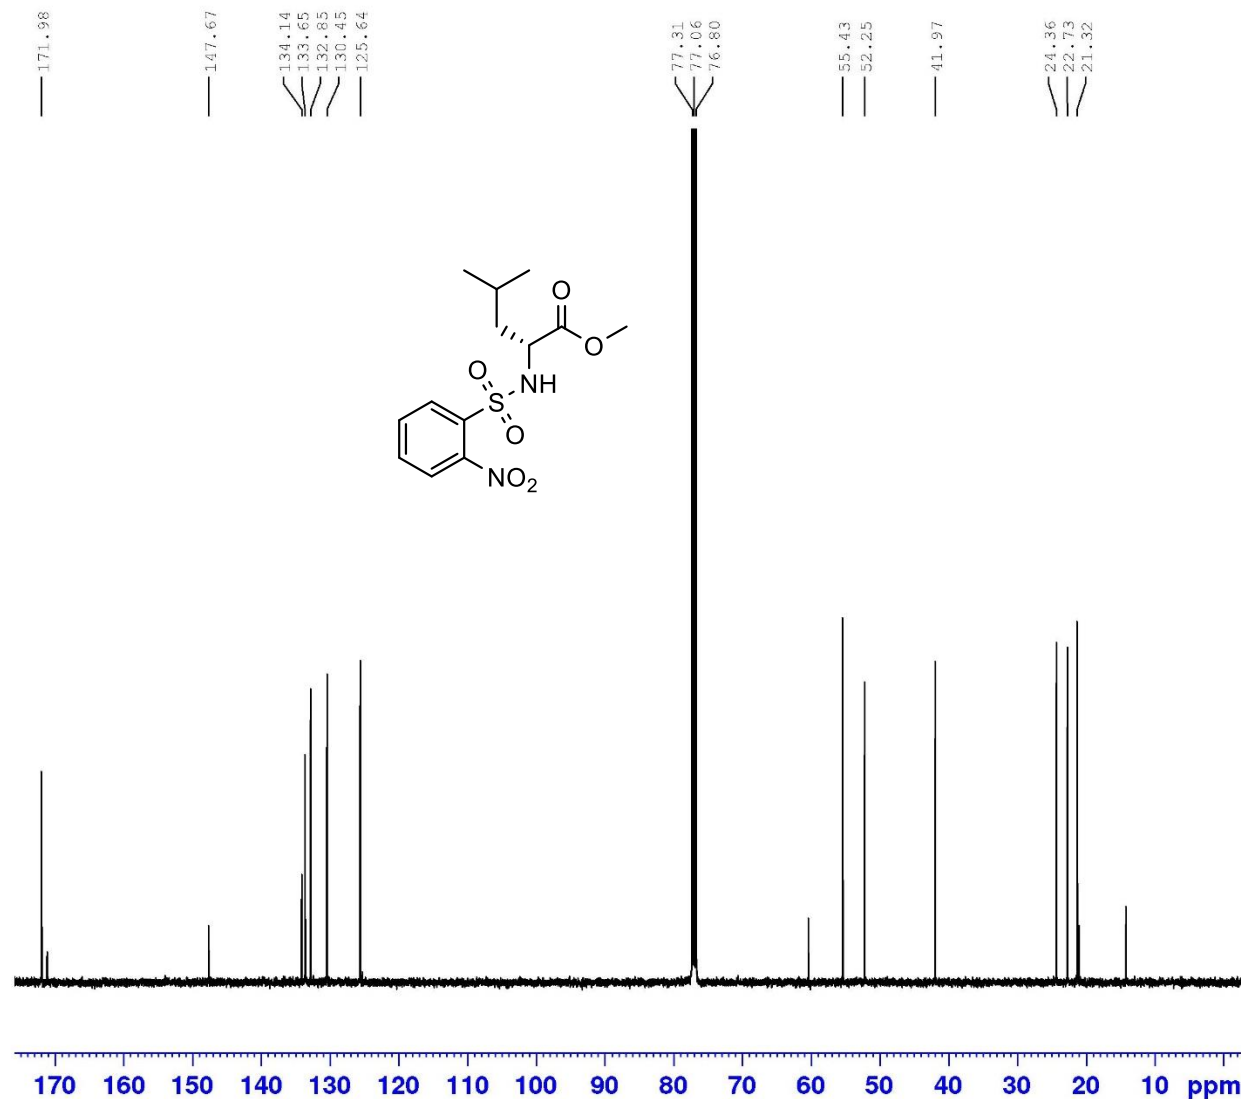

<sup>13</sup>C-NMR 26d

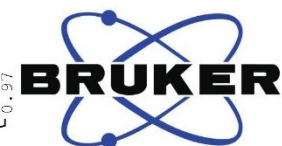

Current Data Parameters  
 NAME Oct20-2020  
 EXPNO 50  
 PROCNO 1

F2 - Acquisition Parameters  
 Date\_ 20201020  
 Time 16.10  
 INSTRUM spect  
 PROBHD 5 mm PABBO BB-  
 PULPROG zg30  
 TD 32768  
 SOLVENT CDCl3  
 NS 32  
 DS 0  
 SWH 10330.578 Hz  
 FIDRES 0.315264 Hz  
 AQ 1.5859712 sec  
 RG 256  
 DW 48.400 usec  
 DE 10.00 usec  
 TE 296.0 K  
 D1 2.00000000 sec  
 TD0 1

===== CHANNEL f1 =====  
 NUC1 1H  
 P1 11.23 usec  
 PL1 1.00 dB  
 PL1W 19.75309753 W  
 SFO1 500.1560886 MHz

F2 - Processing parameters  
 SI 16384  
 SF 500.1530159 MHz  
 WDW EM  
 SSB 0  
 LB 0.30 Hz  
 GB 0  
 PC 1.00

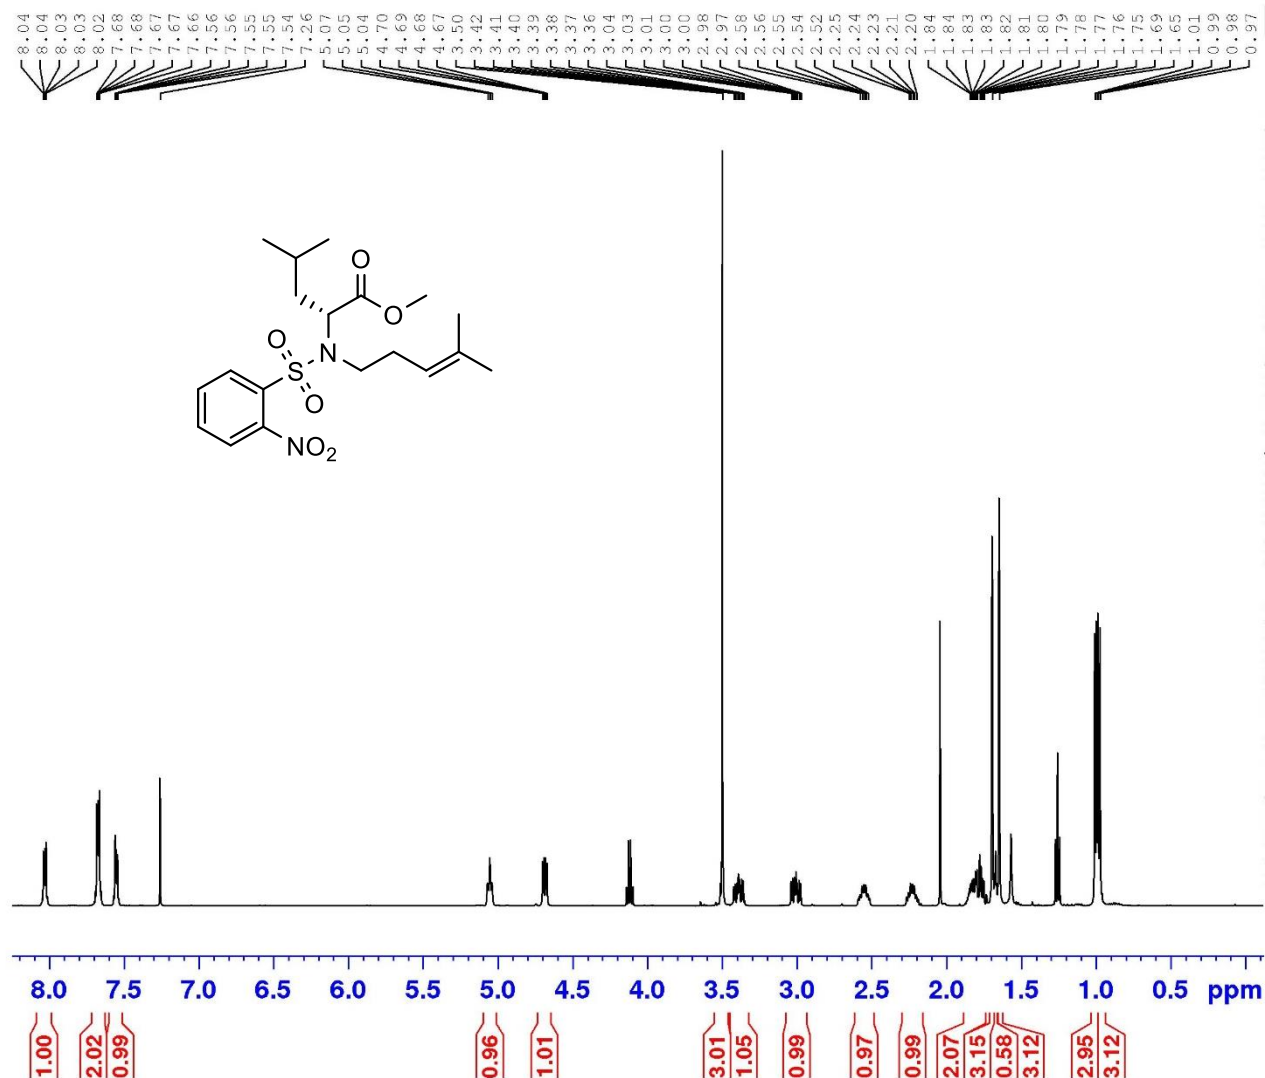

<sup>1</sup>H-NMR 27d

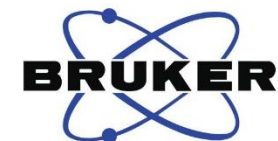

Current Data Parameters  
 NAME Oct20-2020  
 EXPNO 51  
 PROCNO 1

F2 - Acquisition Parameters  
 Date\_ 20201020  
 Time 17.03  
 INSTRUM spect  
 PROBHD 5 mm PABBO BB-  
 PULPROG zgpg30  
 TD 65536  
 SOLVENT CDCl3  
 NS 1024  
 DS 4  
 SWH 32894.738 Hz  
 FIDRES 0.501934 Hz  
 AQ 0.9961472 sec  
 RG 2300  
 DW 15.200 usec  
 DE 10.00 usec  
 TE 296.0 K  
 D1 2.00000000 sec  
 D11 0.03000000 sec  
 TD0 1

===== CHANNEL f1 =====  
 NUC1 13C  
 P1 10.20 usec  
 PL1 1.50 dB  
 PL1W 51.74793243 W  
 SFO1 125.7761482 MHz

===== CHANNEL f2 =====  
 CPDPRG[2] waltz16  
 NUC2 1H  
 PCPD2 100.00 usec  
 PL2 1.00 dB  
 PL12 19.99 dB  
 PL13 21.00 dB  
 PL2W 19.75309753 W  
 PL12W 0.24925002 W  
 PL13W 0.19753097 W  
 SFO2 500.1550006 MHz

F2 - Processing parameters  
 SI 32768  
 SF 125.7635720 MHz  
 WDW EM  
 SSB 0  
 LB 1.00 Hz  
 GB 0  
 PC 1.40

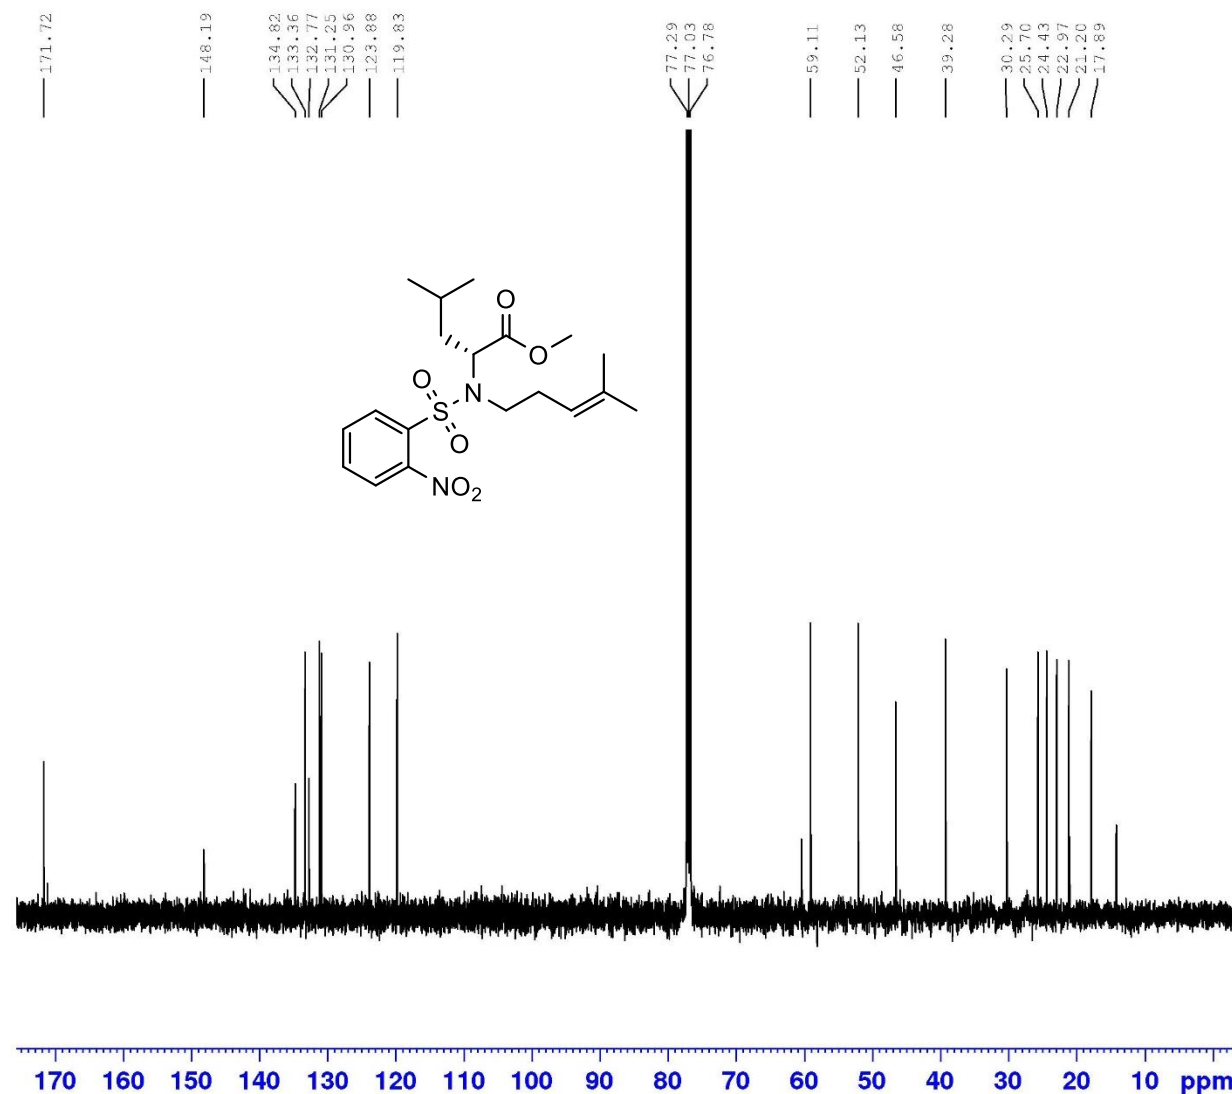

<sup>13</sup>C-NMR 27d

8.12  
8.10  
7.69  
7.69  
7.68  
7.67  
7.60  
7.58  
7.26

5.09  
5.08  
5.06  
4.14  
4.12  
4.11  
4.10  
3.89  
3.88  
3.88  
3.87  
3.86  
3.60  
3.58  
3.57  
3.56  
3.55  
3.33  
3.23  
3.22  
3.20  
2.44  
2.43  
2.42  
2.34  
2.32  
2.31  
2.04  
1.70  
1.64  
1.60  
1.59  
1.57  
1.37  
1.38  
1.32  
1.31  
1.29  
1.28  
1.27  
1.25  
1.24  
0.84  
0.83

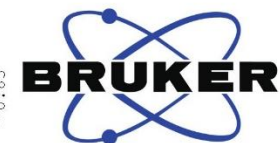

Current Data Parameters  
NAME Nov04-2020  
EXPNO 40  
PROCNO 1

F2 - Acquisition Parameters  
Date\_ 20201104  
Time 13.58  
INSTRUM spect  
PROBHD 5 mm PABBO BB-  
PULPROG zg30  
TD 32768  
SOLVENT CDCl3  
NS 32  
DS 0  
SWH 10330.578 Hz  
FIDRES 0.315264 Hz  
AQ 1.5859712 sec  
RG 406  
DW 48.400 usec  
DE 10.00 usec  
TE 296.0 K  
D1 2.00000000 sec  
TD0 1

===== CHANNEL f1 =====  
NUC1 1H  
P1 11.23 usec  
PL1 1.00 dB  
PL1W 19.75309753 W  
SFO1 500.1560886 MHz

F2 - Processing parameters  
SI 16384  
SF 500.1530171 MHz  
WDW EM  
SSB 0  
LB 0.30 Hz  
GB 0  
PC 1.00

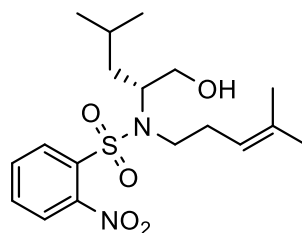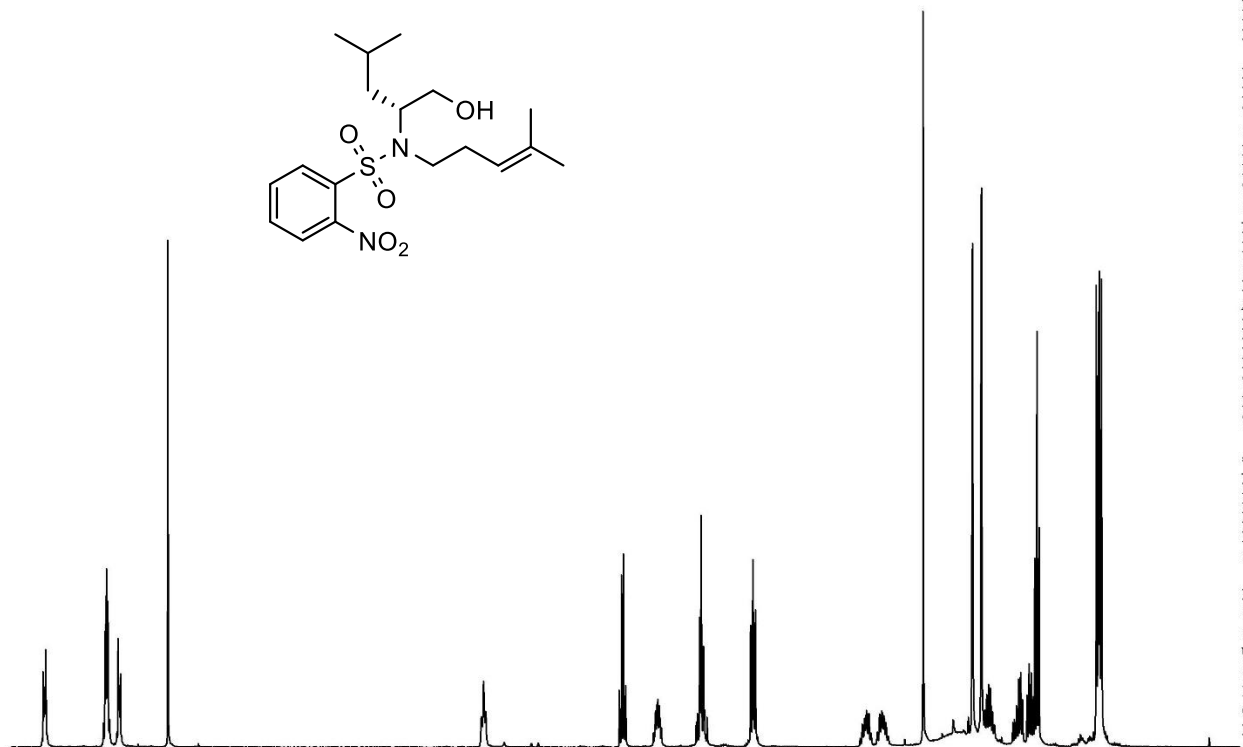

8.0 7.5 7.0 6.5 6.0 5.5 5.0 4.5 4.0 3.5 3.0 2.5 2.0 1.5 1.0 0.5 ppm

1.00  
2.00  
1.02

0.95

0.99

2.06

1.91

0.99

1.08

3.13

3.02

1.57

0.99

2.82

3.21

<sup>1</sup>H-NMR 28d

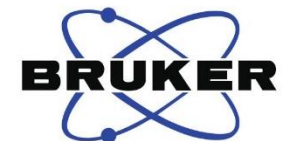

Current Data Parameters  
 NAME Nov04-2020  
 EXPNO 41  
 PROCNO 1

F2 - Acquisition Parameters  
 Date\_ 20201104  
 Time 14.52  
 INSTRUM spect  
 PROBHD 5 mm PABBO BB-  
 PULPROG zgpg30  
 TD 65536  
 SOLVENT CDCl3  
 NS 1024  
 DS 4  
 SWH 32894.738 Hz  
 FIDRES 0.501934 Hz  
 AQ 0.9961472 sec  
 RG 2580  
 DW 15.200 usec  
 DE 10.00 usec  
 TE 296.0 K  
 D1 2.00000000 sec  
 D11 0.03000000 sec  
 TD0 1

===== CHANNEL f1 =====  
 NUC1 13C  
 P1 10.20 usec  
 PL1 1.50 dB  
 PL1W 51.74793243 W  
 SFO1 125.7761482 MHz

===== CHANNEL f2 =====  
 CPDPRG[2] waltz16  
 NUC2 1H  
 PCPD2 100.00 usec  
 PL2 1.00 dB  
 PL12 19.99 dB  
 PL13 21.00 dB  
 PL2W 19.75309753 W  
 PL12W 0.24925002 W  
 PL13W 0.19753097 W  
 SFO2 500.1550006 MHz

F2 - Processing parameters  
 SI 32768  
 SF 125.7635720 MHz  
 WDW EM  
 SSB 0  
 LB 1.00 Hz  
 GB 0  
 PC 1.40

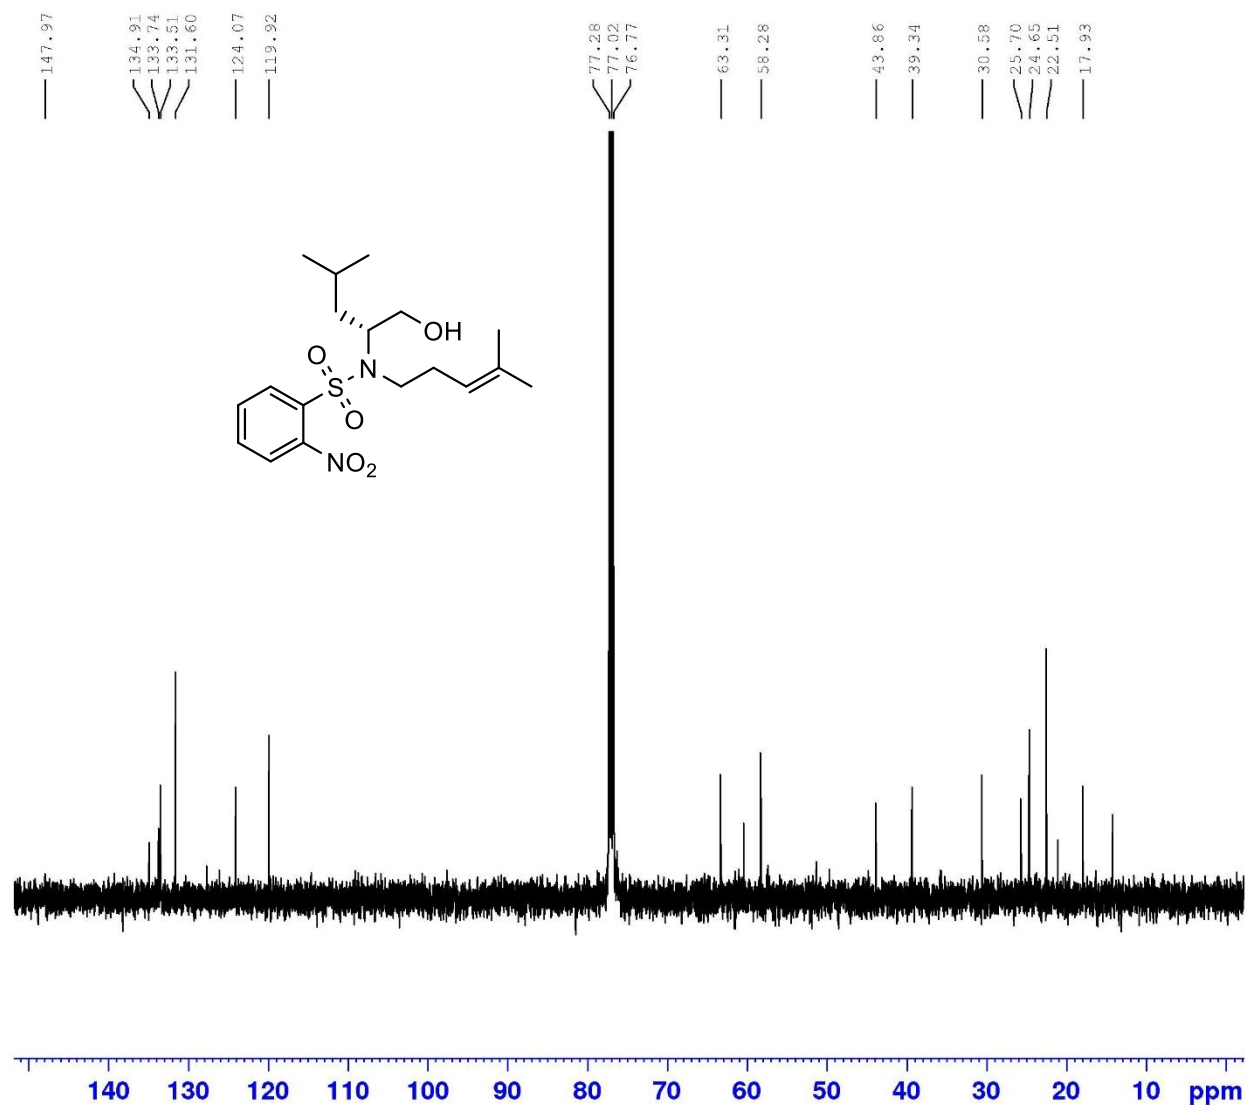

<sup>13</sup>C-NMR 28d

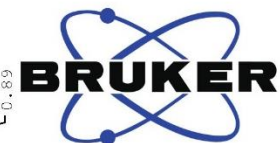

Current Data Parameters  
 NAME Nov05-2020  
 EXPNO 50  
 PROCNO 1

F2 - Acquisition Parameters  
 Date\_ 20201105  
 Time 22.15  
 INSTRUM spect  
 PROBHD 5 mm PABBO BB-  
 PULPROG zg30  
 TD 32768  
 SOLVENT CDC13  
 NS 32  
 DS 0  
 SWH 10330.578 Hz  
 FIDRES 0.315264 Hz  
 AQ 1.5859712 sec  
 RG 456  
 DW 48.400 usec  
 DE 10.00 usec  
 TE 296.0 K  
 D1 2.00000000 sec  
 TDO 1

===== CHANNEL f1 =====  
 NUC1 1H  
 P1 11.23 usec  
 PL1 1.00 dB  
 PL1W 19.75309753 W  
 SFO1 500.1560886 MHz

F2 - Processing parameters  
 SI 16384  
 SF 500.1530160 MHz  
 WDW EM  
 SSB 0  
 LB 0.30 Hz  
 GB 0  
 PC 1.00

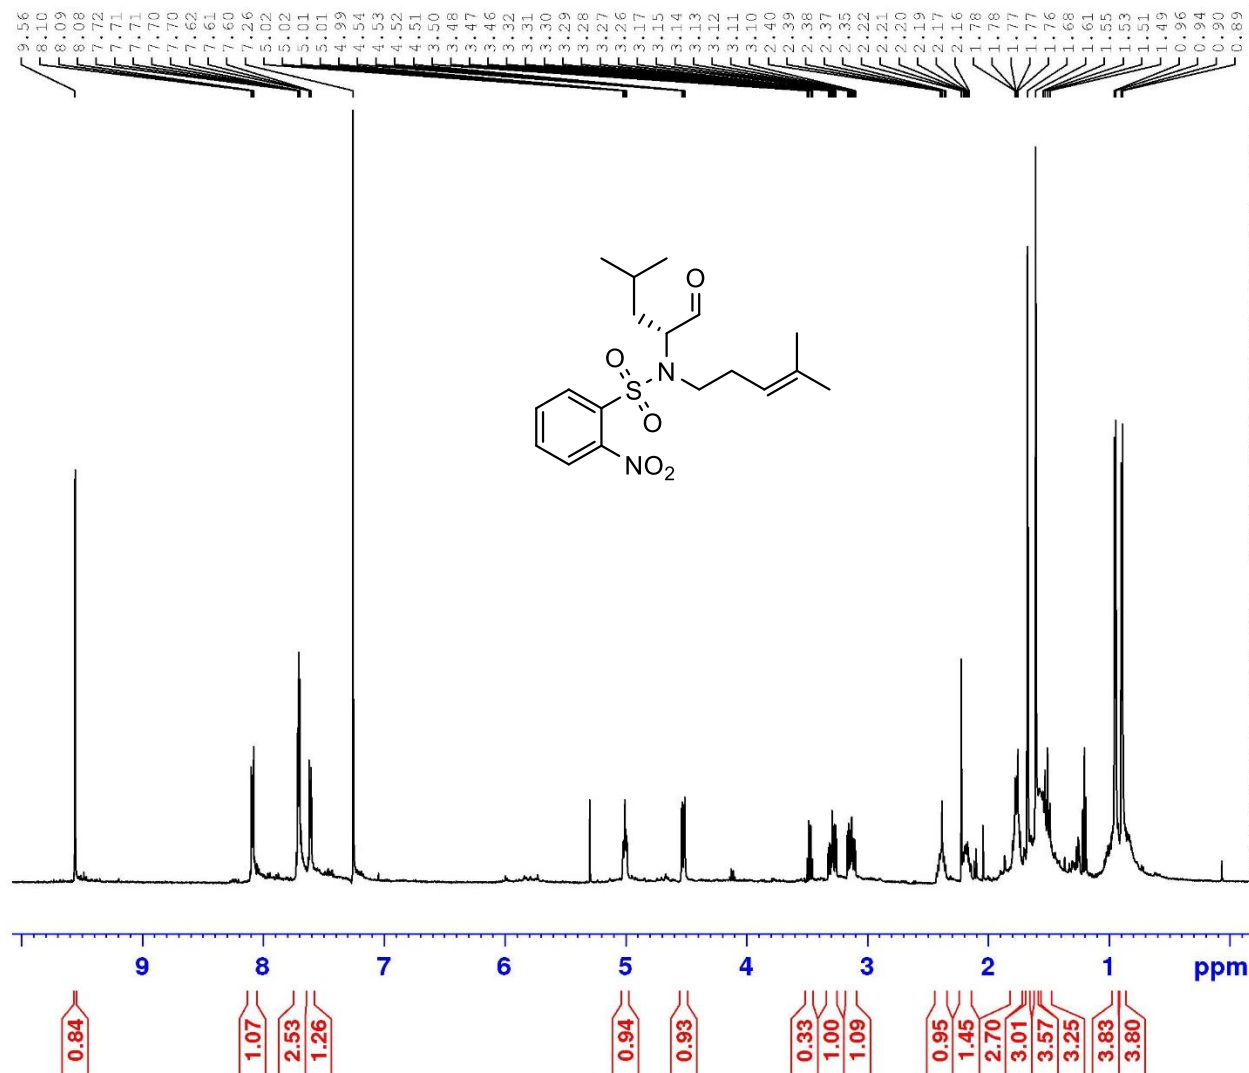

<sup>1</sup>H-NMR 29d

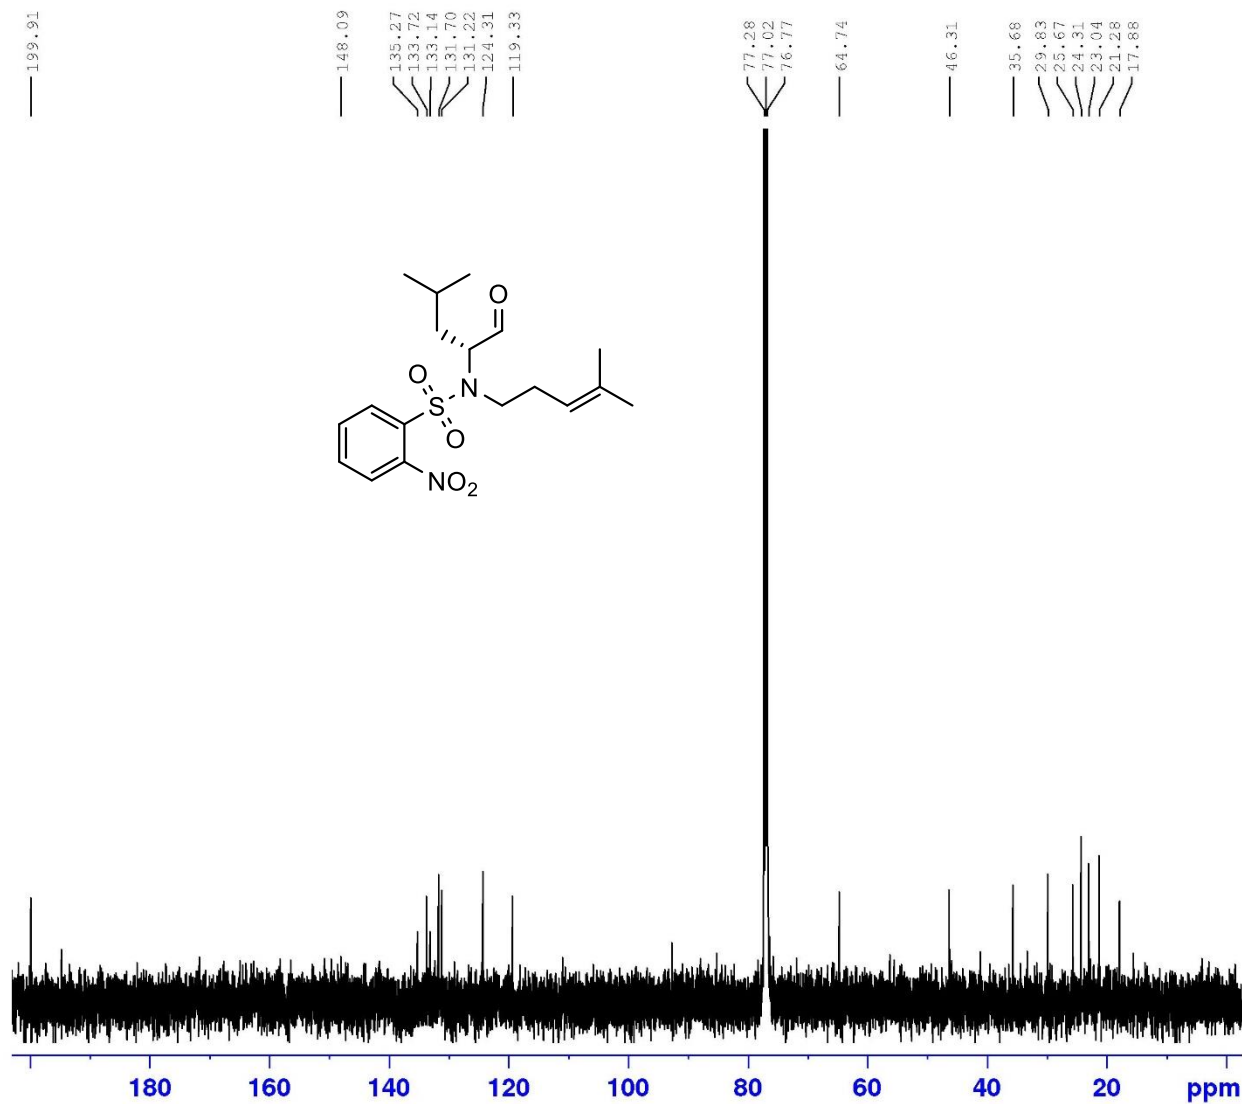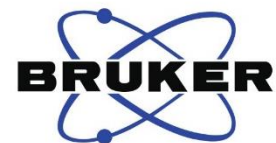

Current Data Parameters  
 NAME Nov05-2020  
 EXPNO 51  
 PROCNO 1

F2 - Acquisition Parameters  
 Date\_ 20201105  
 Time 23.09  
 INSTRUM spect  
 PROBHD 5 mm PABBO BB-  
 PULPROG zgpg30  
 TD 65536  
 SOLVENT CDCl3  
 NS 1024  
 DS 4  
 SWH 32894.738 Hz  
 FIDRES 0.501934 Hz  
 AQ 0.9961472 sec  
 RG 2580  
 DW 15.200 usec  
 DE 10.00 usec  
 TE 296.0 K  
 D1 2.00000000 sec  
 D11 0.03000000 sec  
 TD0 1

===== CHANNEL f1 =====  
 NUC1 13C  
 P1 10.20 usec  
 PL1 1.50 dB  
 PL1W 51.74793243 W  
 SFO1 125.7761482 MHz

===== CHANNEL f2 =====  
 CPDPRG[2] waltz16  
 NUC2 1H  
 PCPD2 100.00 usec  
 PL2 1.00 dB  
 PL12 19.99 dB  
 PL13 21.00 dB  
 PL2W 19.75309753 W  
 PL12W 0.24925002 W  
 PL13W 0.19753097 W  
 SFO2 500.1550006 MHz

F2 - Processing parameters  
 SI 32768  
 SF 125.7635720 MHz  
 WDW EM  
 SSB 0  
 LB 1.00 Hz  
 GB 0  
 PC 1.40

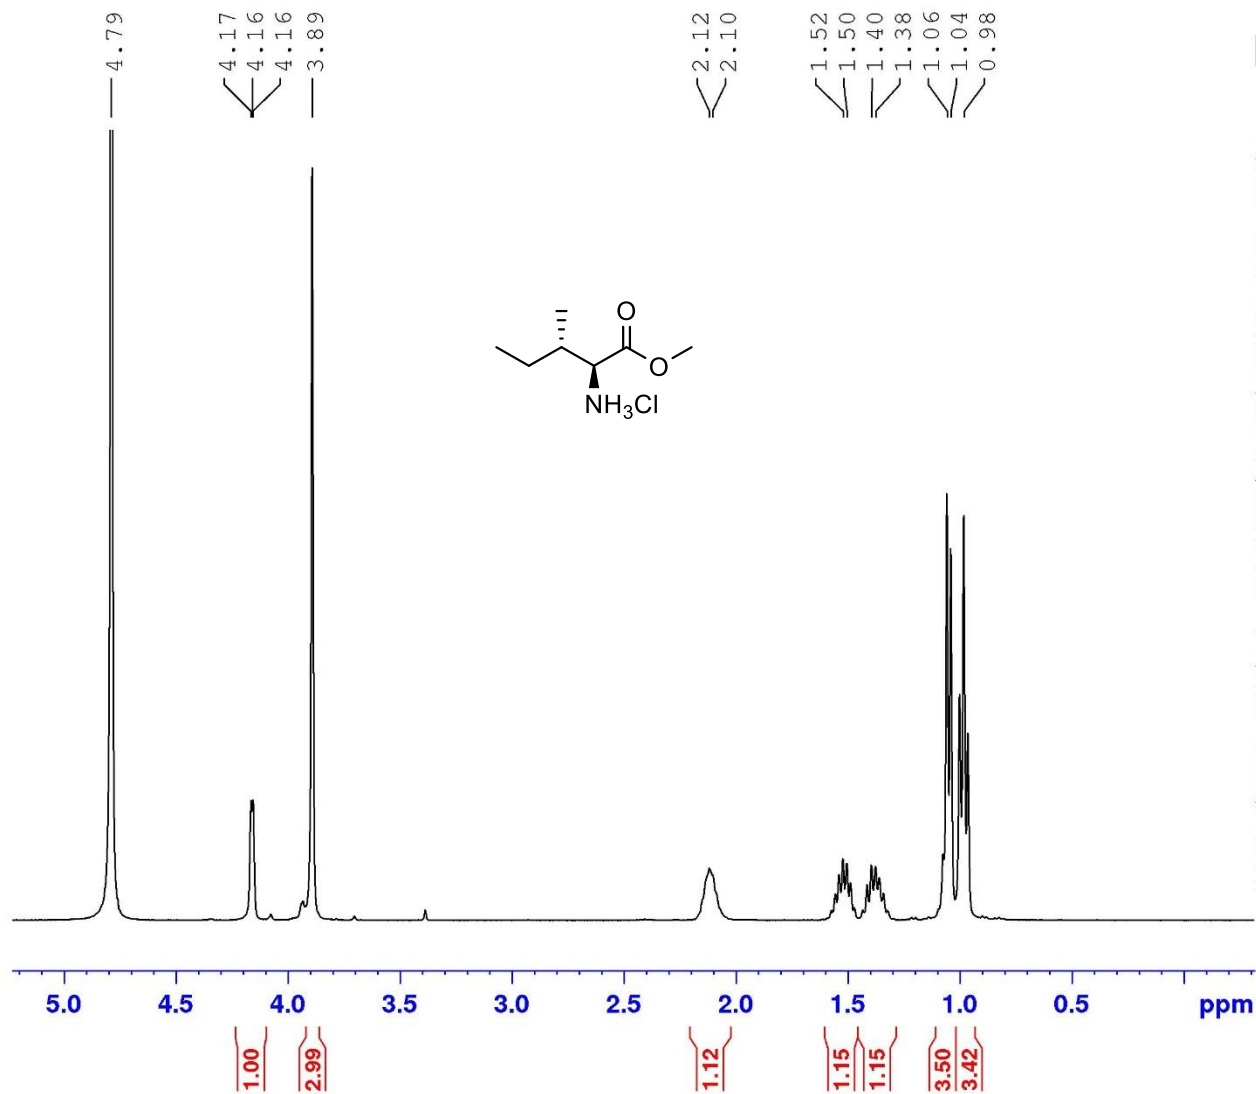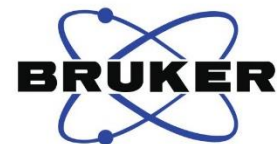

Current Data Parameters  
 NAME Mar05-2020  
 EXPNO 370  
 PROCNO 1

F2 - Acquisition Parameters  
 Date\_ 20200306  
 Time 0.54  
 INSTRUM spect  
 PROBHD 5 mm PABBO BB/  
 PULPROG zg30  
 TD 65536  
 SOLVENT D2O  
 NS 16  
 DS 2  
 SWH 8012.820 Hz  
 FIDRES 0.122266 Hz  
 AQ 4.0894465 sec  
 RG 160.83  
 DW 62.400 usec  
 DE 6.50 usec  
 TE 298.0 K  
 D1 1.00000000 sec  
 TD0 1

===== CHANNEL f1 =====  
 SFO1 400.1024708 MHz  
 NUC1 1H  
 P1 13.70 usec  
 PLW1 12.00000000 W

F2 - Processing parameters  
 SI 65536  
 SF 400.0999650 MHz  
 WDW EM  
 SSB 0  
 LB 0.30 Hz  
 GB 0  
 PC 1.00

<sup>1</sup>H-NMR 25e

170.33

57.28  
53.32

36.01

24.81

14.06  
10.81

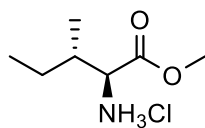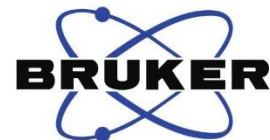

Current Data Parameters  
NAME Mar05-2020  
EXPNO 371  
PROCNO 1

F2 - Acquisition Parameters  
Date\_ 20200306  
Time 1.24  
INSTRUM spect  
PROBHD 5 mm PABBO BB/  
PULPROG zgpg30  
TD 65536  
SOLVENT D2O  
NS 512  
DS 4  
SWH 24038.461 Hz  
FIDRES 0.366798 Hz  
AQ 1.3631488 sec  
RG 205.35  
DW 20.800 usec  
DE 6.50 usec  
TE 298.0 K  
D1 2.00000000 sec  
D11 0.03000000 sec  
TD0 1

===== CHANNEL f1 =====  
SFO1 100.6152851 MHz  
NUC1 13C  
P1 10.00 usec  
PLW1 48.00000000 W

===== CHANNEL f2 =====  
SFO2 400.1016004 MHz  
NUC2 1H  
CPDPRG2 waltz16  
PCPD2 90.00 usec  
PLW2 12.00000000 W  
PLW12 0.27805999 W  
PLW13 0.22522999 W

F2 - Processing parameters  
SI 32768  
SF 100.6052250 MHz  
WDW EM  
SSB 0  
LB 1.00 Hz  
GB 0  
PC 1.40

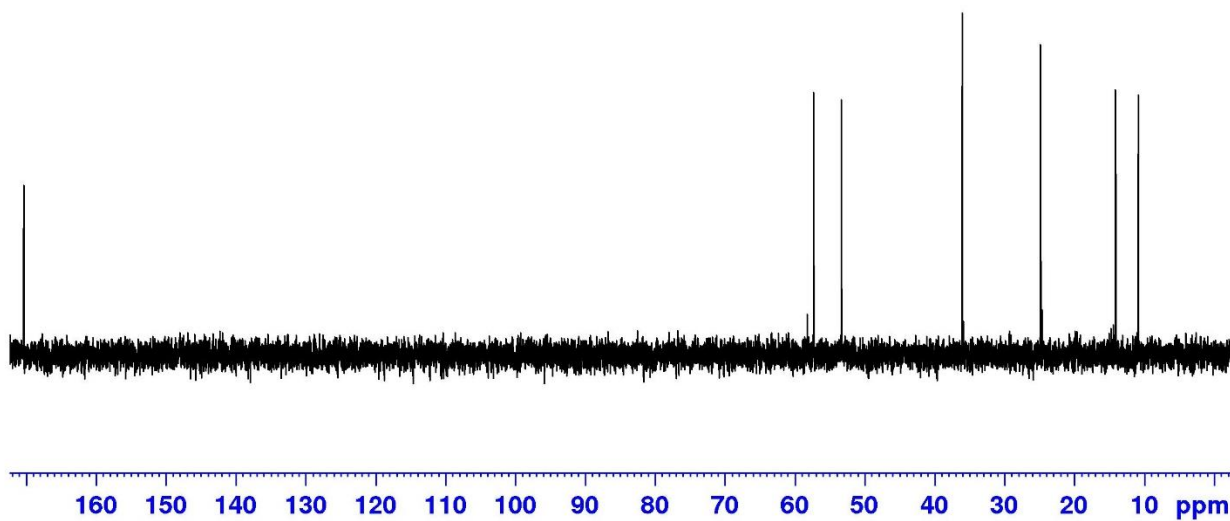

<sup>13</sup>C-NMR 25e

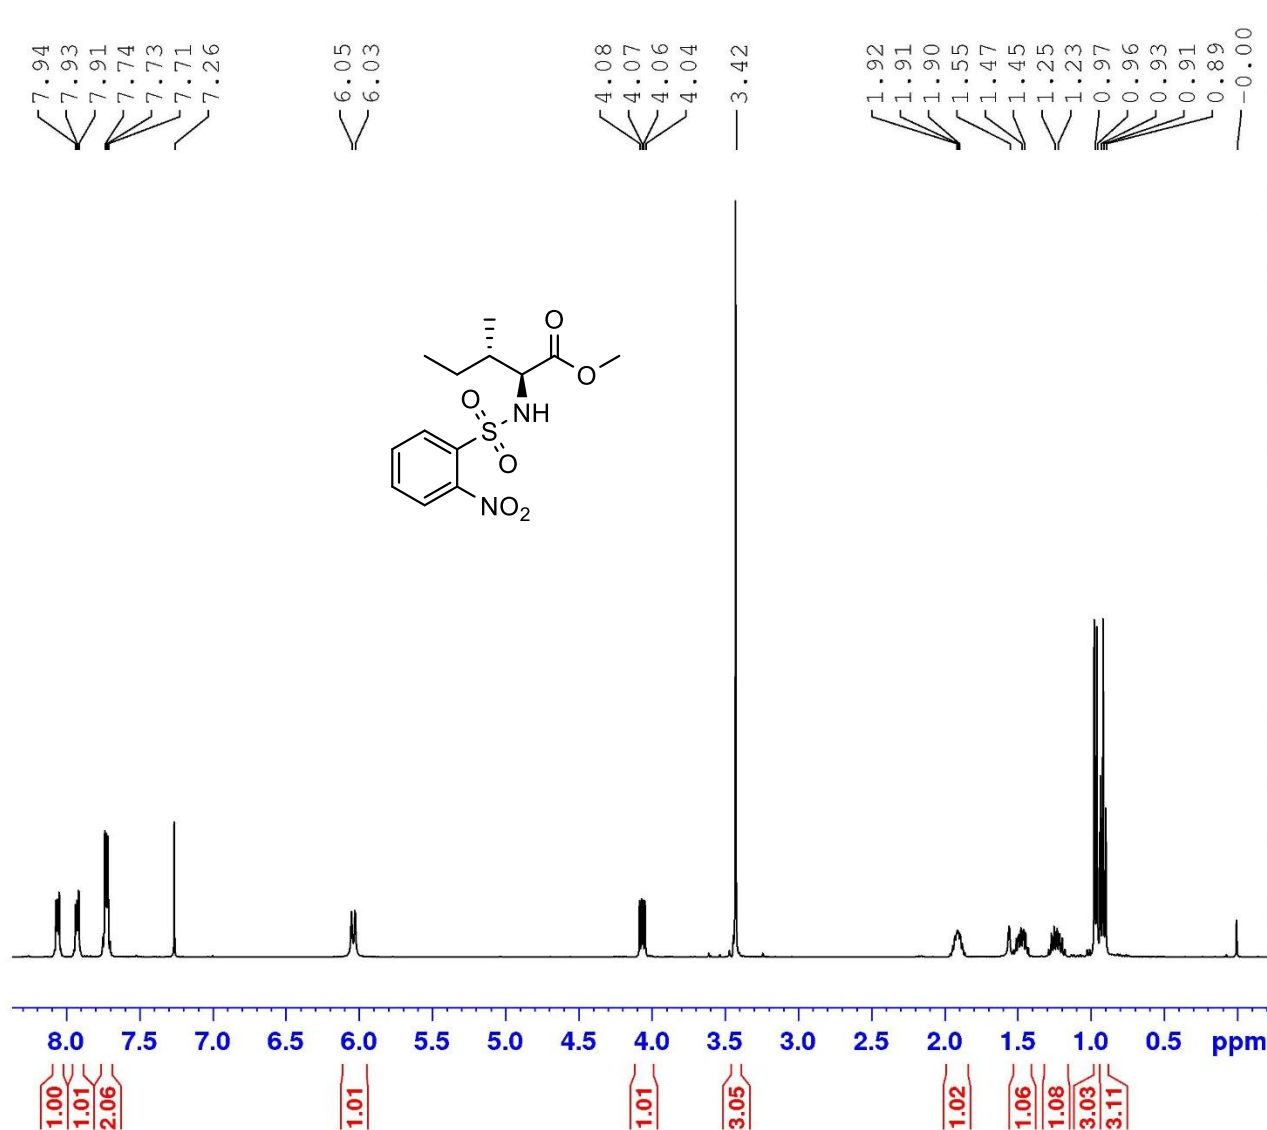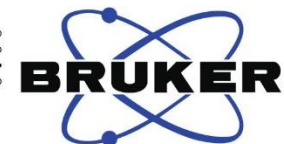

Current Data Parameters  
NAME Feb20-2020  
EXPNO 480  
PROCNO 1

F2 - Acquisition Parameters  
Date\_ 20200220  
Time 15.55  
INSTRUM spect  
PROBHD 5 mm PABBO BB/  
PULPROG zg30  
TD 65536  
SOLVENT CDCl3  
NS 16  
DS 2  
SWH 8012.820 Hz  
FIDRES 0.122266 Hz  
AQ 4.0894465 sec  
RG 205.35  
DW 62.400 usec  
DE 6.50 usec  
TE 298.0 K  
D1 1.00000000 sec  
TDO 1

===== CHANNEL f1 =====  
SFO1 400.1024708 MHz  
NUC1 1H  
P1 13.70 usec  
PLW1 12.00000000 W

F2 - Processing parameters  
SI 65536  
SF 400.1000086 MHz  
WDW EM  
SSB 0  
LB 0.30 Hz  
GB 0  
PC 1.00

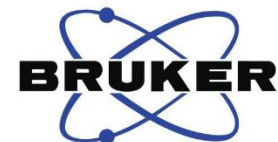

Current Data Parameters  
 NAME Feb20-2020  
 EXPNO 481  
 PROCNO 1

F2 - Acquisition Parameters  
 Date\_ 20200220  
 Time 23.58  
 INSTRUM spect  
 PROBHD 5 mm PABBO BB/  
 PULPROG zgpg30  
 TD 65536  
 SOLVENT CDCl3  
 NS 512  
 DS 4  
 SWH 24038.461 Hz  
 FIDRES 0.366798 Hz  
 AQ 1.3631488 sec  
 RG 205.35  
 DW 20.800 usec  
 DE 6.50 usec  
 TE 298.0 K  
 D1 2.00000000 sec  
 D11 0.03000000 sec  
 TDO 1

===== CHANNEL f1 =====  
 SFO1 100.6152851 MHz  
 NUC1 13C  
 P1 10.00 usec  
 PLW1 48.00000000 W

===== CHANNEL f2 =====  
 SFO2 400.1016004 MHz  
 NUC2 1H  
 CPDPRG[2] waltz16  
 PCPD2 90.00 usec  
 PLW2 12.00000000 W  
 PLW12 0.27805999 W  
 PLW13 0.22522999 W

F2 - Processing parameters  
 SI 32768  
 SF 100.6052250 MHz  
 WDW EM  
 SSB 0  
 LB 1.00 Hz  
 GB 0  
 PC 1.40

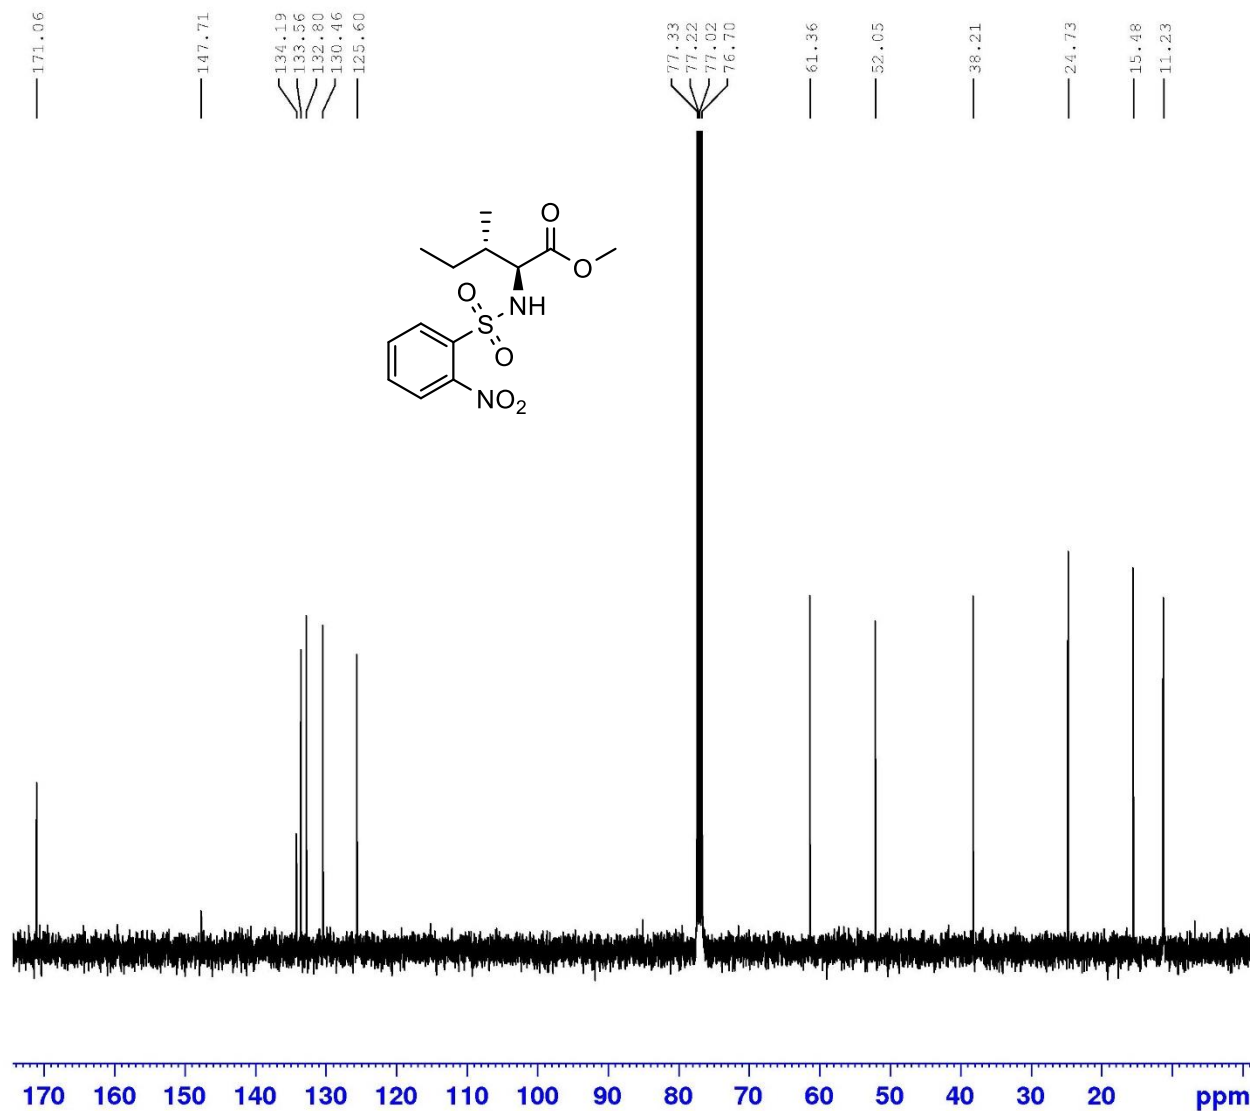

<sup>13</sup>C-NMR 26e

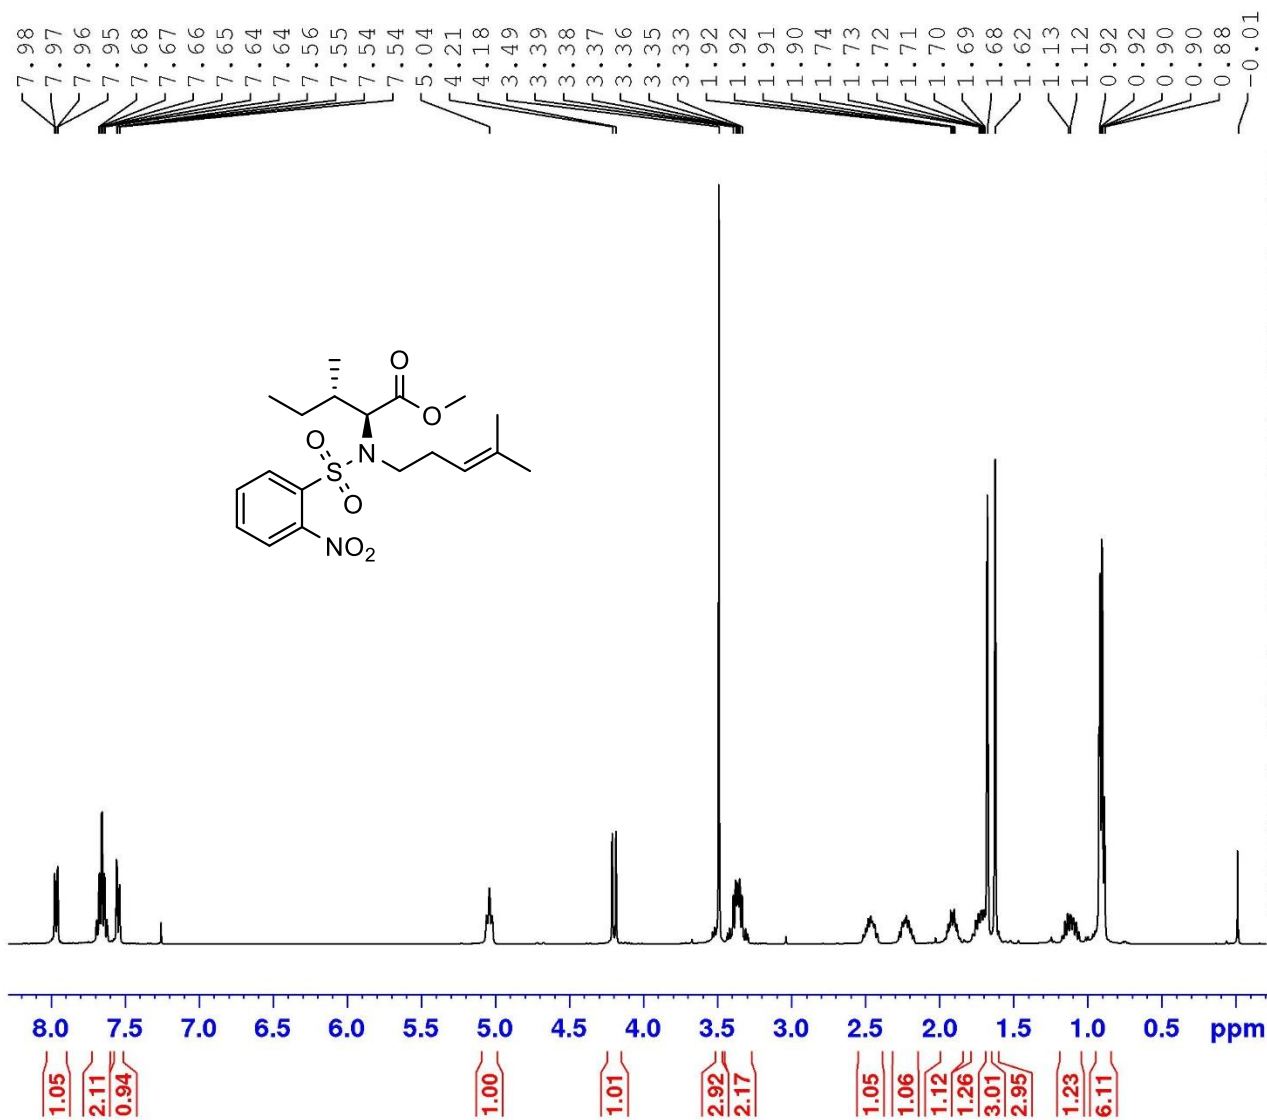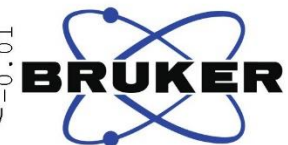

Current Data Parameters  
 NAME Apr16-2020  
 EXPNO 260  
 PROCNO 1

F2 - Acquisition Parameters  
 Date\_ 20200416  
 Time 14.48  
 INSTRUM spect  
 PROBHD 5 mm PABBO BB/  
 PULPROG zg30  
 TD 65536  
 SOLVENT CDCl3  
 NS 16  
 DS 2  
 SWH 8012.820 Hz  
 FIDRES 0.122266 Hz  
 AQ 4.0894465 sec  
 RG 55.81  
 DW 62.400 usec  
 DE 6.50 usec  
 TE 298.0 K  
 D1 1.00000000 sec  
 TD0 1

===== CHANNEL f1 =====  
 SFO1 400.1024708 MHz  
 NUC1 1H  
 P1 13.70 usec  
 PLW1 12.00000000 W

F2 - Processing parameters  
 SI 65536  
 SF 400.1000103 MHz  
 WDW EM  
 SSB 0  
 LB 0.30 Hz  
 GB 0  
 PC 1.00

<sup>1</sup>H-NMR 27e

S192

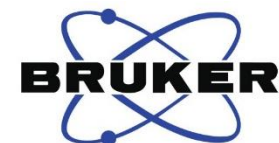

Current Data Parameters  
 NAME Apr16-2020  
 EXPNO 261  
 PROCNO 1

F2 - Acquisition Parameters  
 Date\_ 20200417  
 Time 1.11  
 INSTRUM spect  
 PROBHD 5 mm PABBO BB/  
 PULPROG zgpg30  
 TD 65536  
 SOLVENT CDCl3  
 NS 512  
 DS 4  
 SWH 24038.461 Hz  
 FIDRES 0.366798 Hz  
 AQ 1.3631488 sec  
 RG 205.35  
 DW 20.800 usec  
 DE 6.50 usec  
 TE 298.0 K  
 D1 2.00000000 sec  
 D11 0.03000000 sec  
 TD0 1

===== CHANNEL f1 =====  
 SFO1 100.6152851 MHz  
 NUC1 13C  
 P1 10.00 usec  
 PLW1 48.00000000 W

===== CHANNEL f2 =====  
 SFO2 400.1016004 MHz  
 NUC2 1H  
 CPDPRG[2] waltz16  
 PCPD2 90.00 usec  
 PLW2 12.00000000 W  
 PLW12 0.27805999 W  
 PLW13 0.22522999 W

F2 - Processing parameters  
 SI 32768  
 SF 100.6052250 MHz  
 WDW EM  
 SSB 0  
 LB 1.00 Hz  
 GB 0  
 PC 1.40

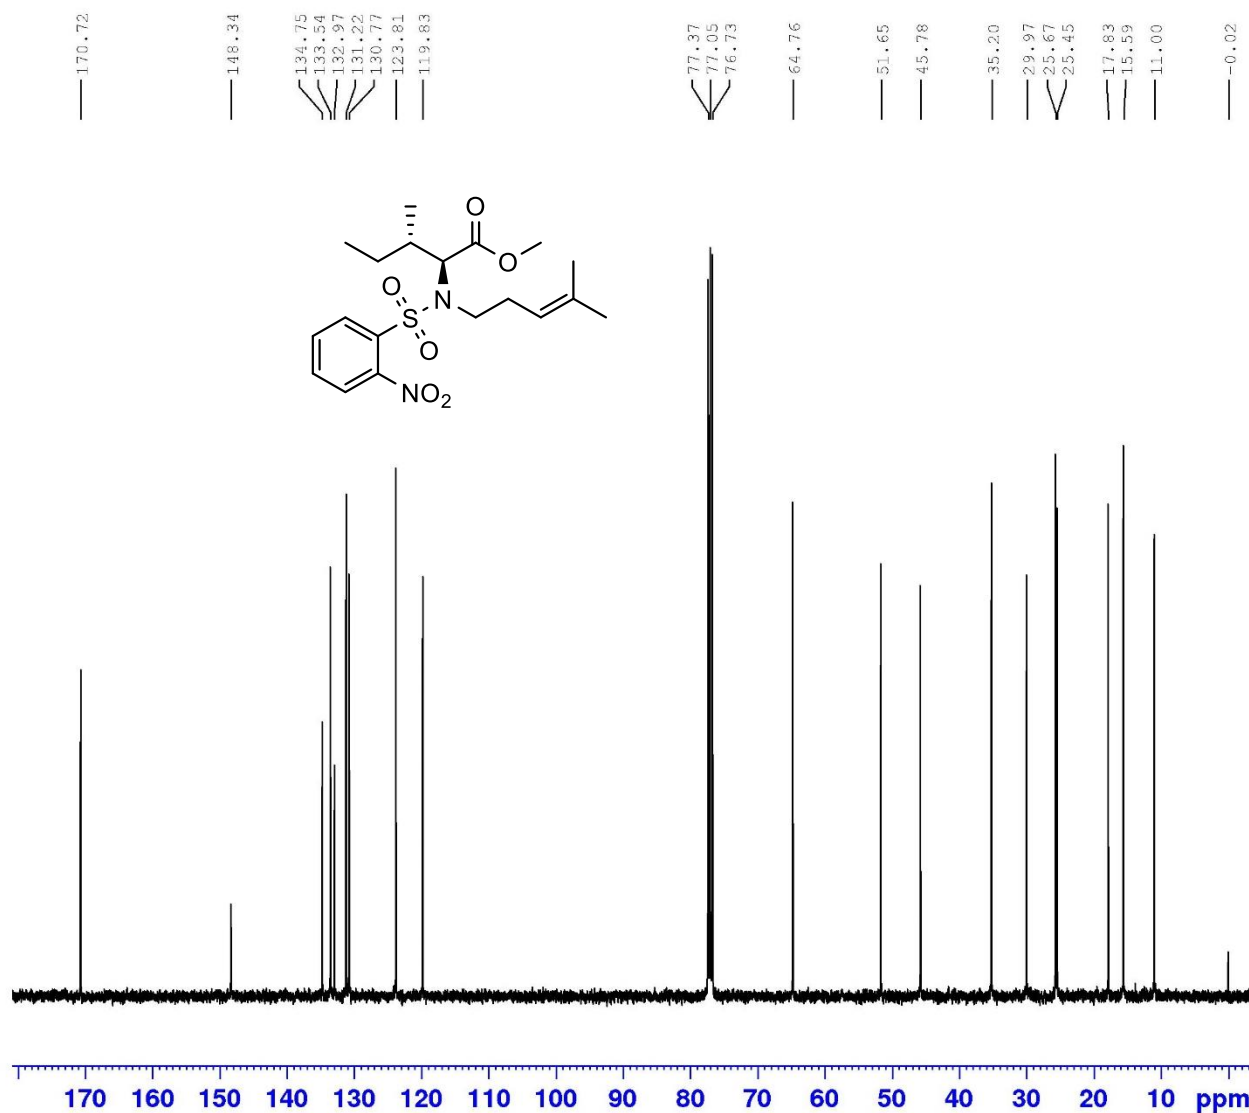

<sup>13</sup>C-NMR 27e

7.67  
7.67  
7.66  
7.66  
7.65  
7.55  
7.53  
7.26

5.07

3.86  
3.85  
3.63  
3.63  
3.61  
3.59  
3.25  
3.24  
3.23  
3.22  
3.20  
3.19  
3.18  
3.17  
2.51  
2.50  
2.34  
2.33  
2.04  
2.03  
2.01  
1.70  
1.65  
1.59  
1.58  
1.58  
1.53  
1.52  
0.91  
0.90  
0.87  
0.86  
0.85  
0.84  
0.84  
0.81

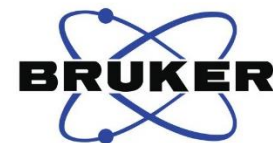

Current Data Parameters  
NAME Feb20-2020  
EXPNO 190  
PROCNO 1

F2 - Acquisition Parameters  
Date\_ 20200220  
Time 20.35  
INSTRUM spect  
PROBHD 5 mm PABBO BB-  
PULPROG zg30  
TD 32768  
SOLVENT CDCl3  
NS 32  
DS 0  
SWH 10330.578 Hz  
FIDRES 0.315264 Hz  
AQ 1.5859712 sec  
RG 456  
DW 48.400 usec  
DE 10.00 usec  
TE 296.0 K  
D1 2.00000000 sec  
TD0 1

===== CHANNEL f1 =====  
NUC1 1H  
P1 11.23 usec  
PL1 1.00 dB  
PL1W 19.75309753 W  
SFO1 500.1560886 MHz

F2 - Processing parameters  
SI 16384  
SF 500.1530178 MHz  
WDW EM  
SSB 0  
LB 0.30 Hz  
GB 0  
PC 1.00

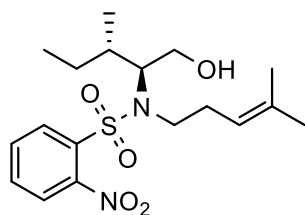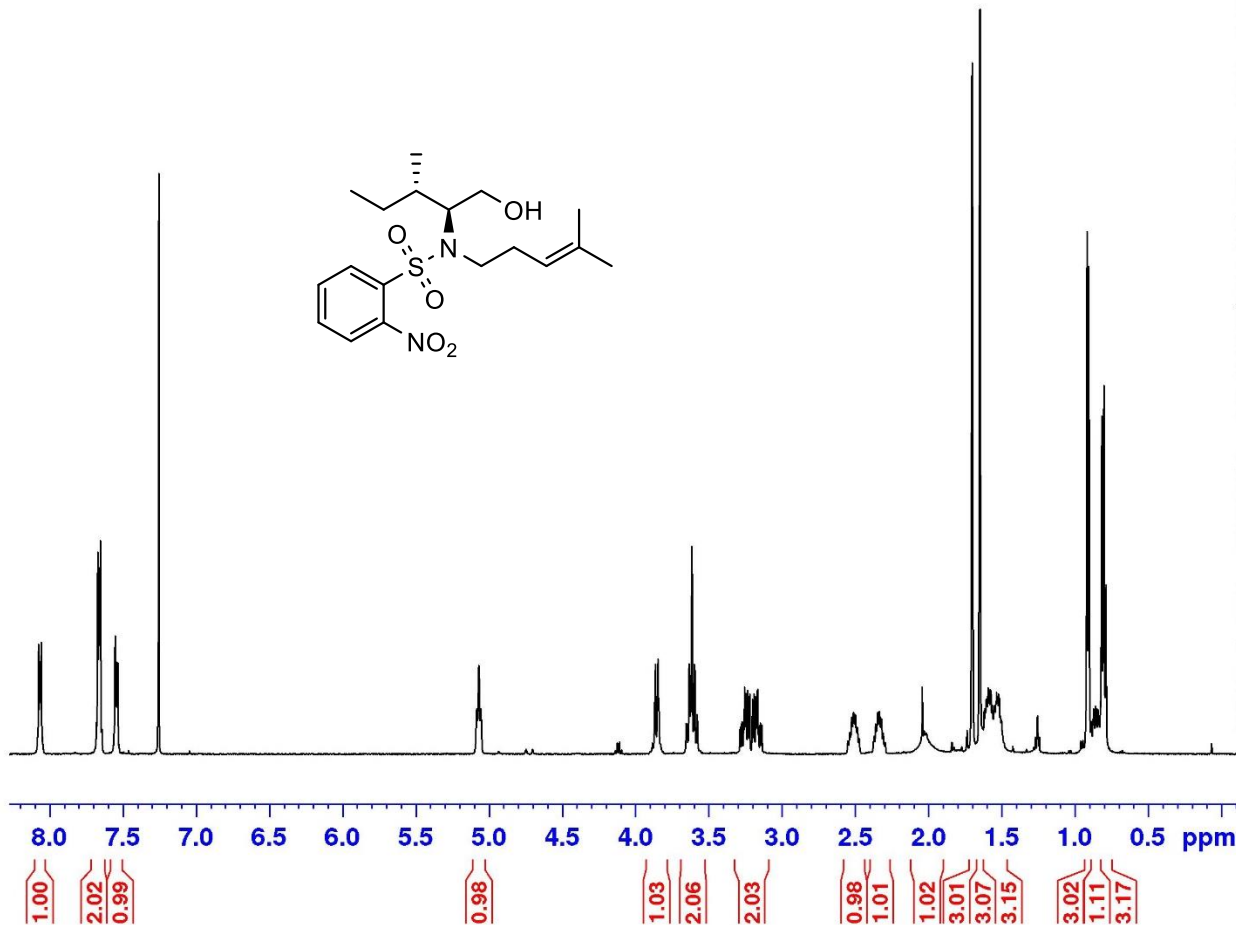

<sup>1</sup>H-NMR 28e

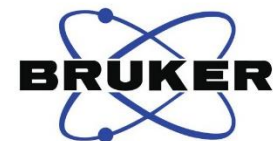

Current Data Parameters  
 NAME Apr08-2020  
 EXPNO 80  
 PROCNO 1

F2 - Acquisition Parameters  
 Date\_ 20200408  
 Time 16.17  
 INSTRUM spect  
 PROBHD 5 mm PABBO BB-  
 PULPROG zgpg30  
 TD 65536  
 SOLVENT CDCl3  
 NS 1024  
 DS 4  
 SWH 32894.738 Hz  
 FIDRES 0.501934 Hz  
 AQ 0.9961472 sec  
 RG 2580  
 DW 15.200 usec  
 DE 10.00 usec  
 TE 296.0 K  
 D1 2.00000000 sec  
 D11 0.03000000 sec  
 TD0 1

===== CHANNEL f1 =====  
 NUC1 13C  
 P1 10.20 usec  
 PL1 1.50 dB  
 PL1W 51.74793243 W  
 SFO1 125.7761482 MHz

===== CHANNEL f2 =====  
 CPDPRG[2] waltz16  
 NUC2 1H  
 PCPD2 100.00 usec  
 PL2 1.00 dB  
 PL12 19.99 dB  
 PL13 21.00 dB  
 PL2W 19.75309753 W  
 PL12W 0.24925002 W  
 PL13W 0.19753097 W  
 SFO2 500.1550006 MHz

F2 - Processing parameters  
 SI 32768  
 SF 125.7635739 MHz  
 WDW EM  
 SSB 0  
 LB 1.00 Hz  
 GB 0  
 PC 1.40

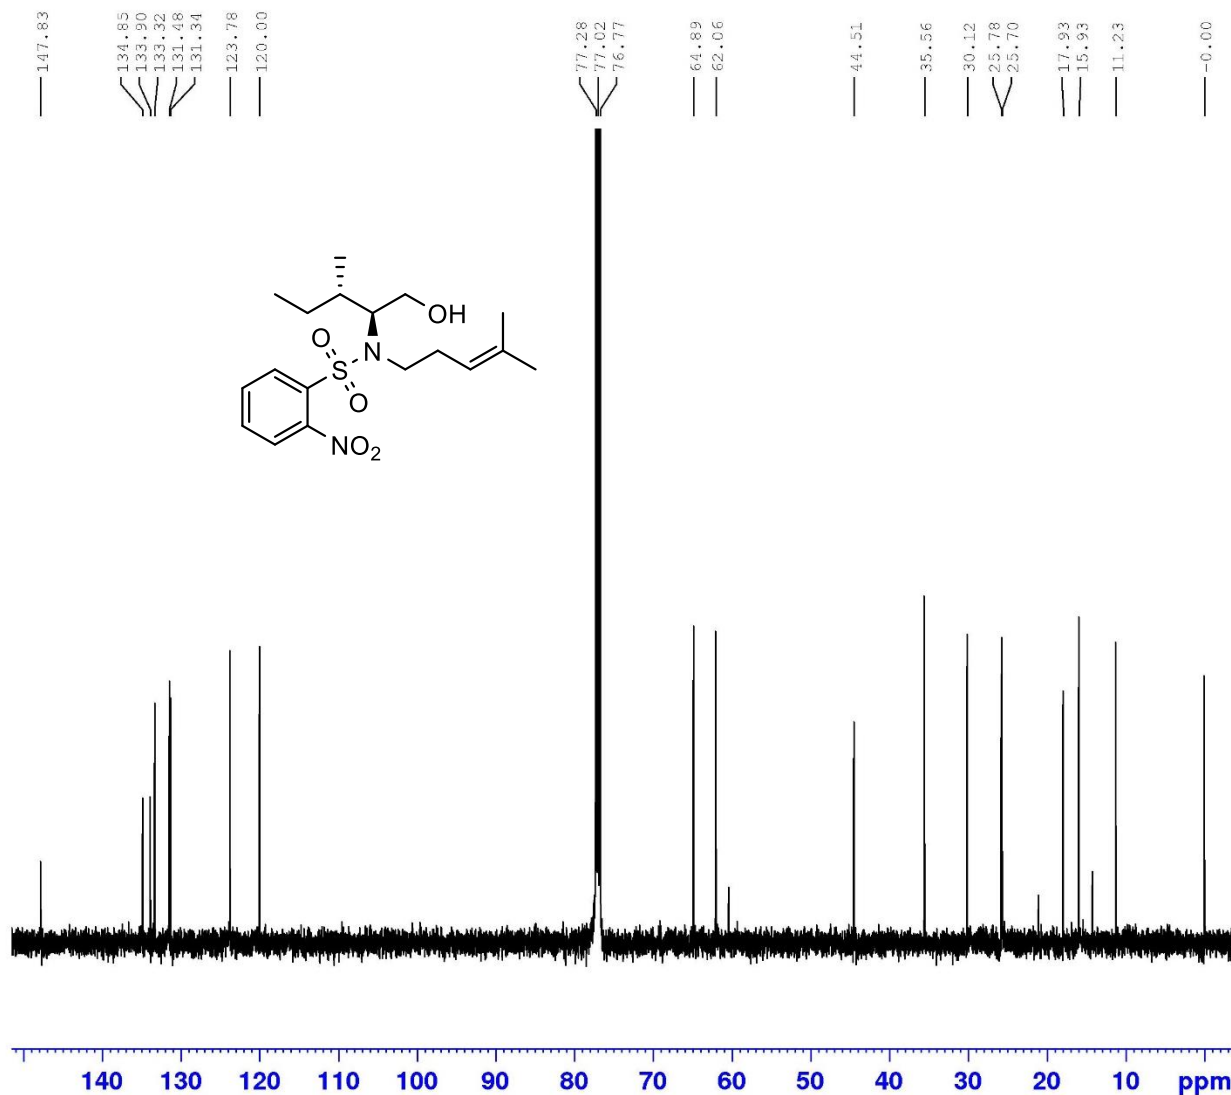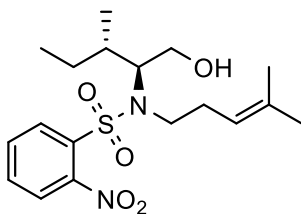

<sup>13</sup>C-NMR 28e

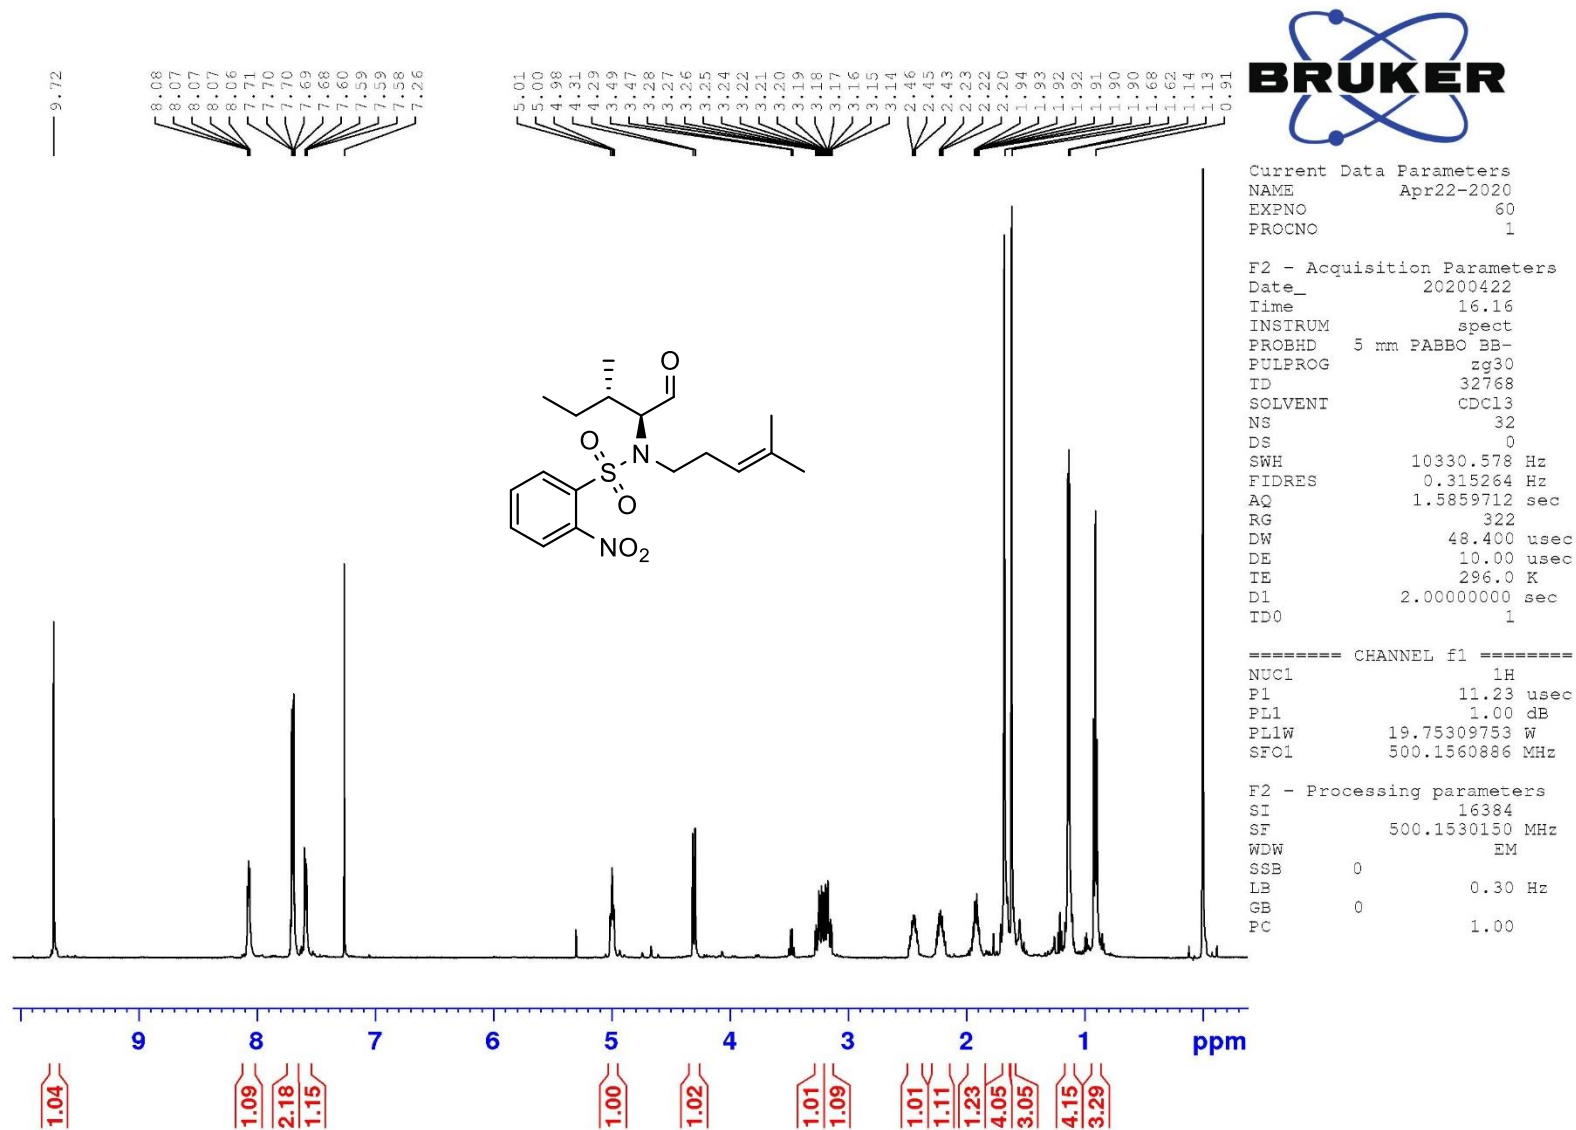

<sup>1</sup>H-NMR 29e

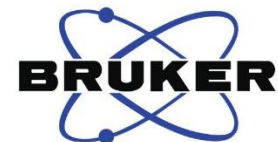

Current Data Parameters  
 NAME Apr22-2020  
 EXPNO 61  
 PROCNO 1

F2 - Acquisition Parameters  
 Date\_ 20200422  
 Time 17.10  
 INSTRUM spect  
 PROBHD 5 mm PABBO BB-  
 PULPROG zgpg30  
 TD 65536  
 SOLVENT CDCl3  
 NS 1024  
 DS 4  
 SWH 32894.738 Hz  
 FIDRES 0.501934 Hz  
 AQ 0.9961472 sec  
 RG 2580  
 DW 15.200 usec  
 DE 10.00 usec  
 TE 296.0 K  
 D1 2.00000000 sec  
 D11 0.03000000 sec  
 TD0 1

===== CHANNEL f1 =====  
 NUC1 13C  
 P1 10.20 usec  
 PL1 1.50 dB  
 PL1W 51.74793243 W  
 SFO1 125.7761482 MHz

===== CHANNEL f2 =====  
 CPDPRG2 waltz16  
 NUC2 1H  
 PCPD2 100.00 usec  
 PL2 1.00 dB  
 PL12 19.99 dB  
 PL13 21.00 dB  
 PL2W 19.75309753 W  
 PL12W 0.24925002 W  
 PL13W 0.19753097 W  
 SFO2 500.1550006 MHz

F2 - Processing parameters  
 SI 32768  
 SF 125.7635739 MHz  
 WDW EM  
 SSB 0  
 LB 1.00 Hz  
 GB 0  
 PC 1.40

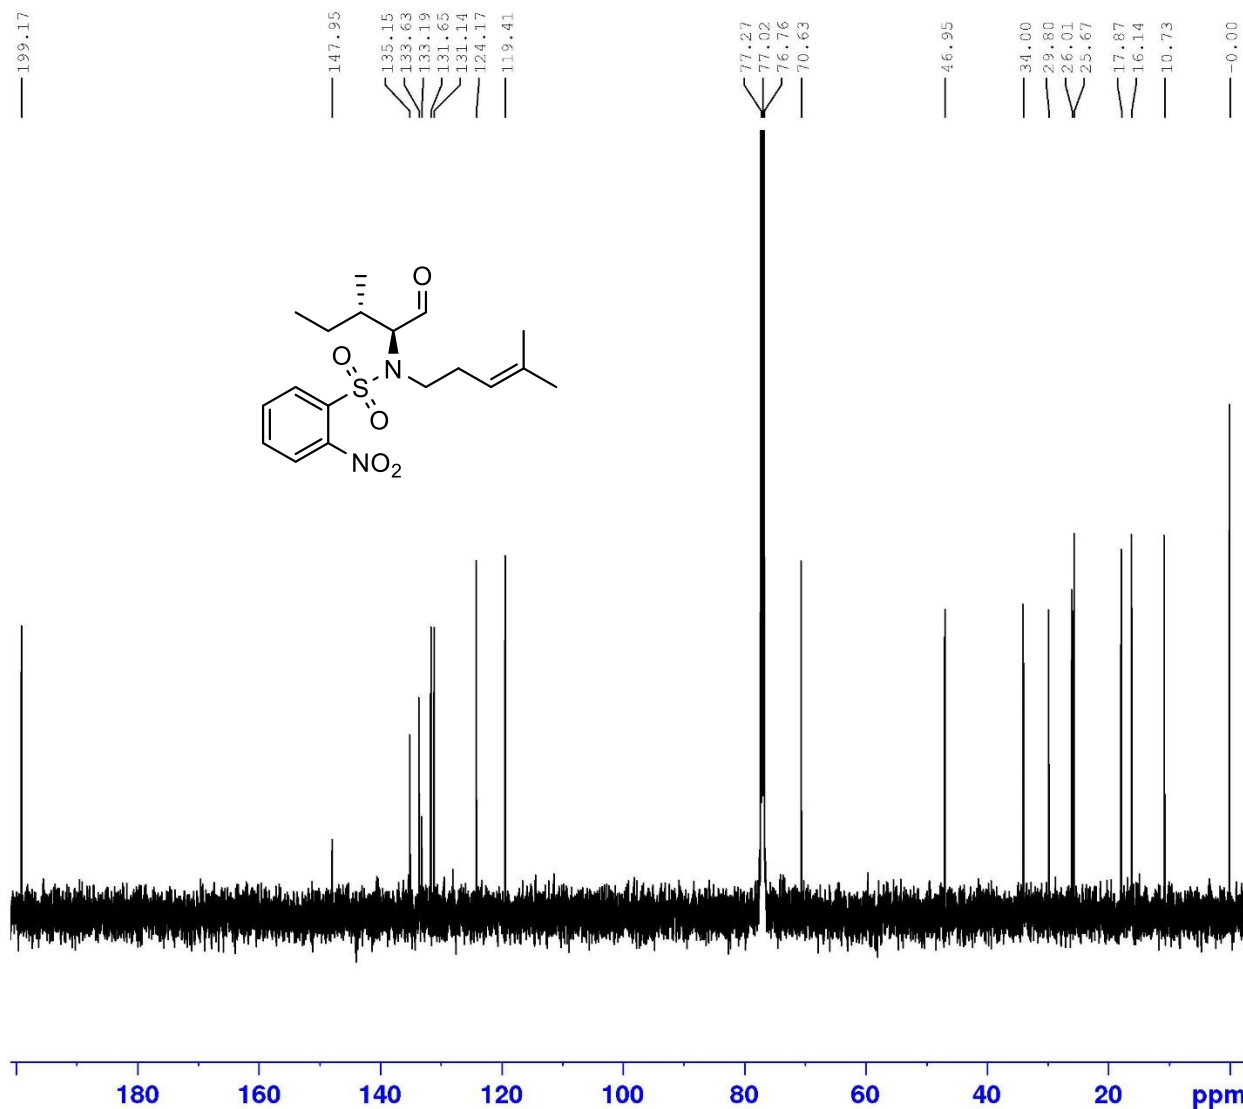

<sup>13</sup>C-NMR 29e

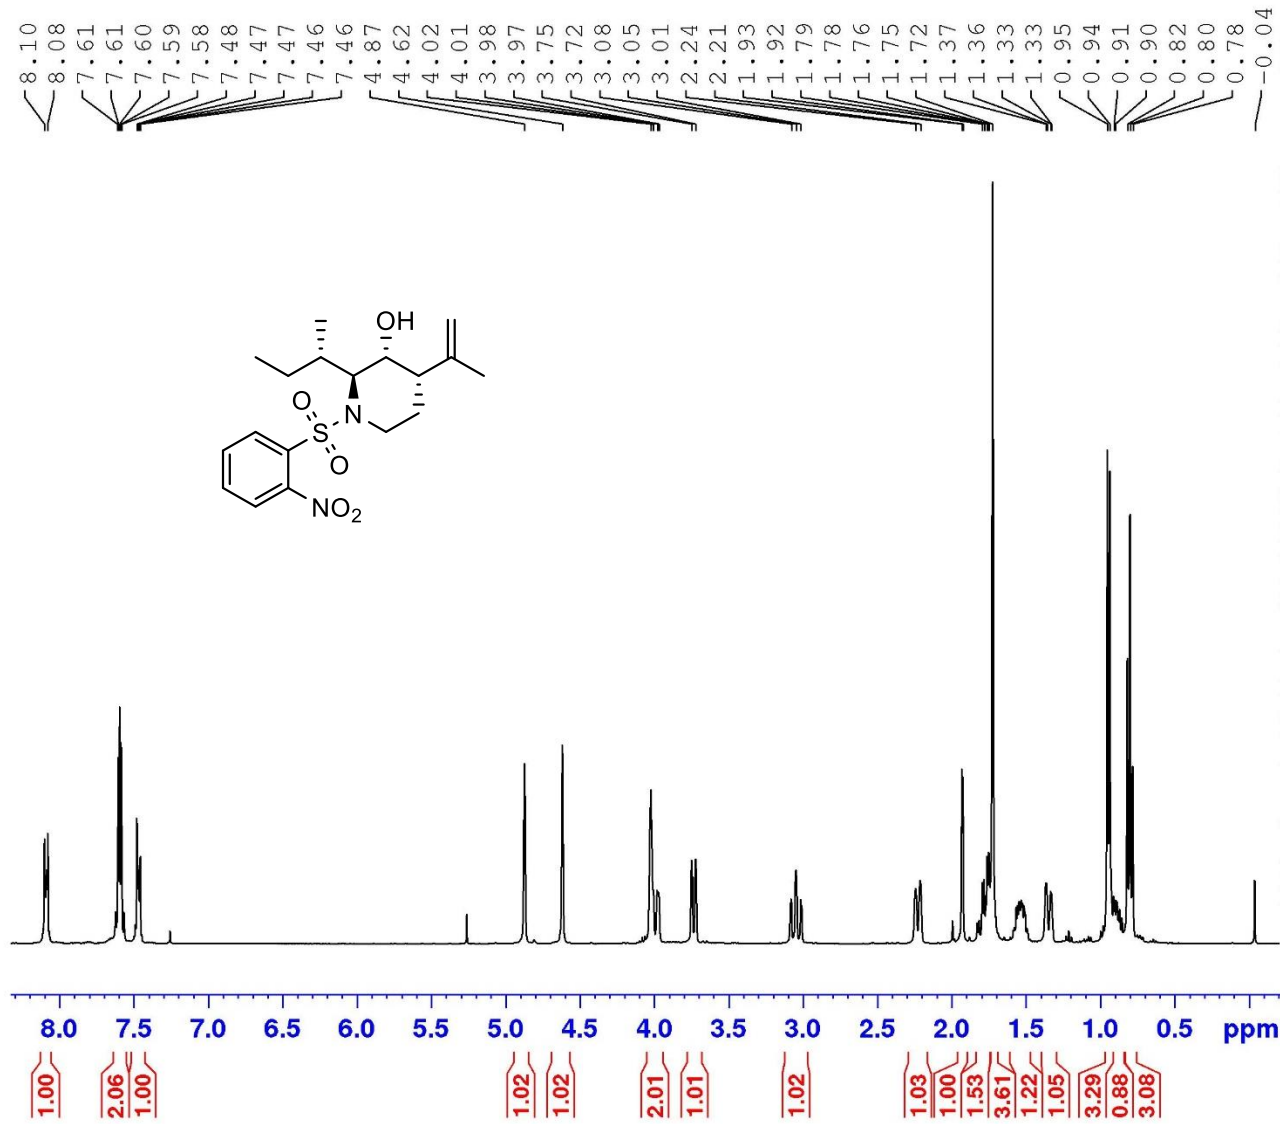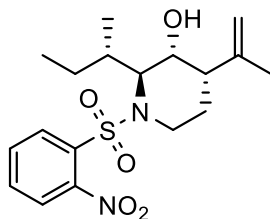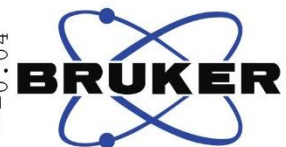

Current Data Parameters  
NAME Apr27-2020  
EXPNO 260  
PROCNO 1

F2 - Acquisition Parameters  
Date\_ 20200427  
Time 15.41  
INSTRUM spect  
PROBHD 5 mm PABBO BB/  
PULPROG zg30  
TD 65536  
SOLVENT CDCl3  
NS 16  
DS 2  
SWH 8012.820 Hz  
FIDRES 0.122266 Hz  
AQ 4.0894465 sec  
RG 19.63  
DW 62.400 usec  
DE 6.50 usec  
TE 298.0 K  
D1 1.00000000 sec  
TD0 1

===== CHANNEL f1 =====  
SFO1 400.1024708 MHz  
NUC1 1H  
P1 13.70 usec  
PLW1 12.00000000 W

F2 - Processing parameters  
SI 65536  
SF 400.100092 MHz  
WDW EM  
SSB 0  
LB 0.30 Hz  
GB 0  
PC 1.00

<sup>1</sup>H-NMR (R,S)-30e

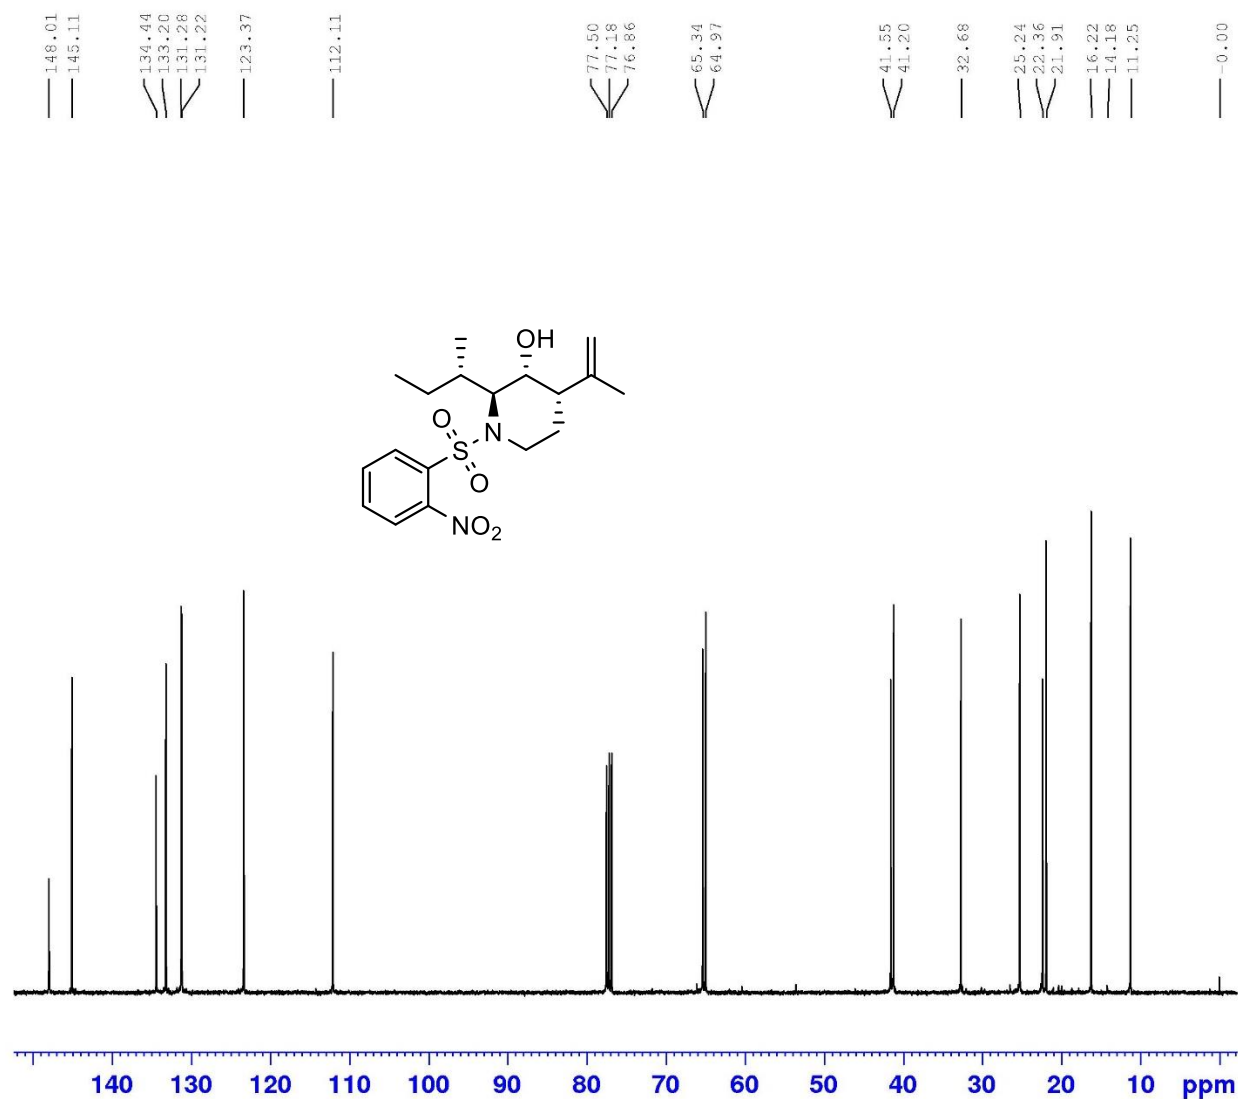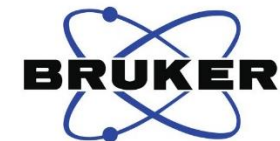

Current Data Parameters  
NAME Apr27-2020  
EXPNO 261  
PROCNO 1

F2 - Acquisition Parameters  
Date\_ 20200427  
Time\_ 21.39  
INSTRUM spect  
PROBHD 5 mm PABBO BB/  
PULPROG zgpg30  
TD 65536  
SOLVENT CDCl3  
NS 512  
DS 4  
SWH 24038.461 Hz  
FIDRES 0.366798 Hz  
AQ 1.3631488 sec  
RG 205.35  
DW 20.800 usec  
DE 6.50 usec  
TE 298.0 K  
D1 2.00000000 sec  
D11 0.03000000 sec  
TD0 1

===== CHANNEL f1 =====  
SFO1 100.6152851 MHz  
NUC1 13C  
P1 10.00 usec  
PLW1 48.00000000 W

===== CHANNEL f2 =====  
SFO2 400.1016004 MHz  
NUC2 1H  
CPDPRG[2] waltz16  
PCPD2 90.00 usec  
PLW2 12.00000000 W  
PLW12 0.27805999 W  
PLW13 0.22522999 W

F2 - Processing parameters  
SI 32768  
SF 100.6052251 MHz  
WDW EM  
SSB 0  
LB 1.00 Hz  
GB 0  
PC 1.40

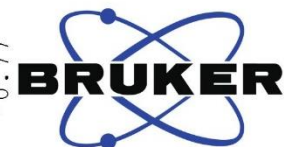

Current Data Parameters  
 NAME Aug04-2020  
 EXPNO 50  
 PROCNO 1

F2 - Acquisition Parameters  
 Date\_ 20200804  
 Time 14.55  
 INSTRUM spect  
 PROBHD 5 mm CPQCI 1H-  
 PULPROG zg  
 TD 65536  
 SOLVENT CDCl3  
 NS 16  
 DS 2  
 SWH 10504.202 Hz  
 FIDRES 0.160281 Hz  
 AQ 3.1195135 sec  
 RG 7.23  
 DW 47.600 usec  
 DE 20.00 usec  
 TE 298.0 K  
 D1 2.00000000 sec  
 TD0 1

===== CHANNEL f1 =====  
 SFO1 700.3632917 MHz  
 NUC1 1H  
 P1 8.15 usec  
 PLW1 9.89999962 W

F2 - Processing parameters  
 SI 65536  
 SF 700.3600173 MHz  
 WDW EM  
 SSB 0  
 LB 0.30 Hz  
 GB 0  
 PC 1.00

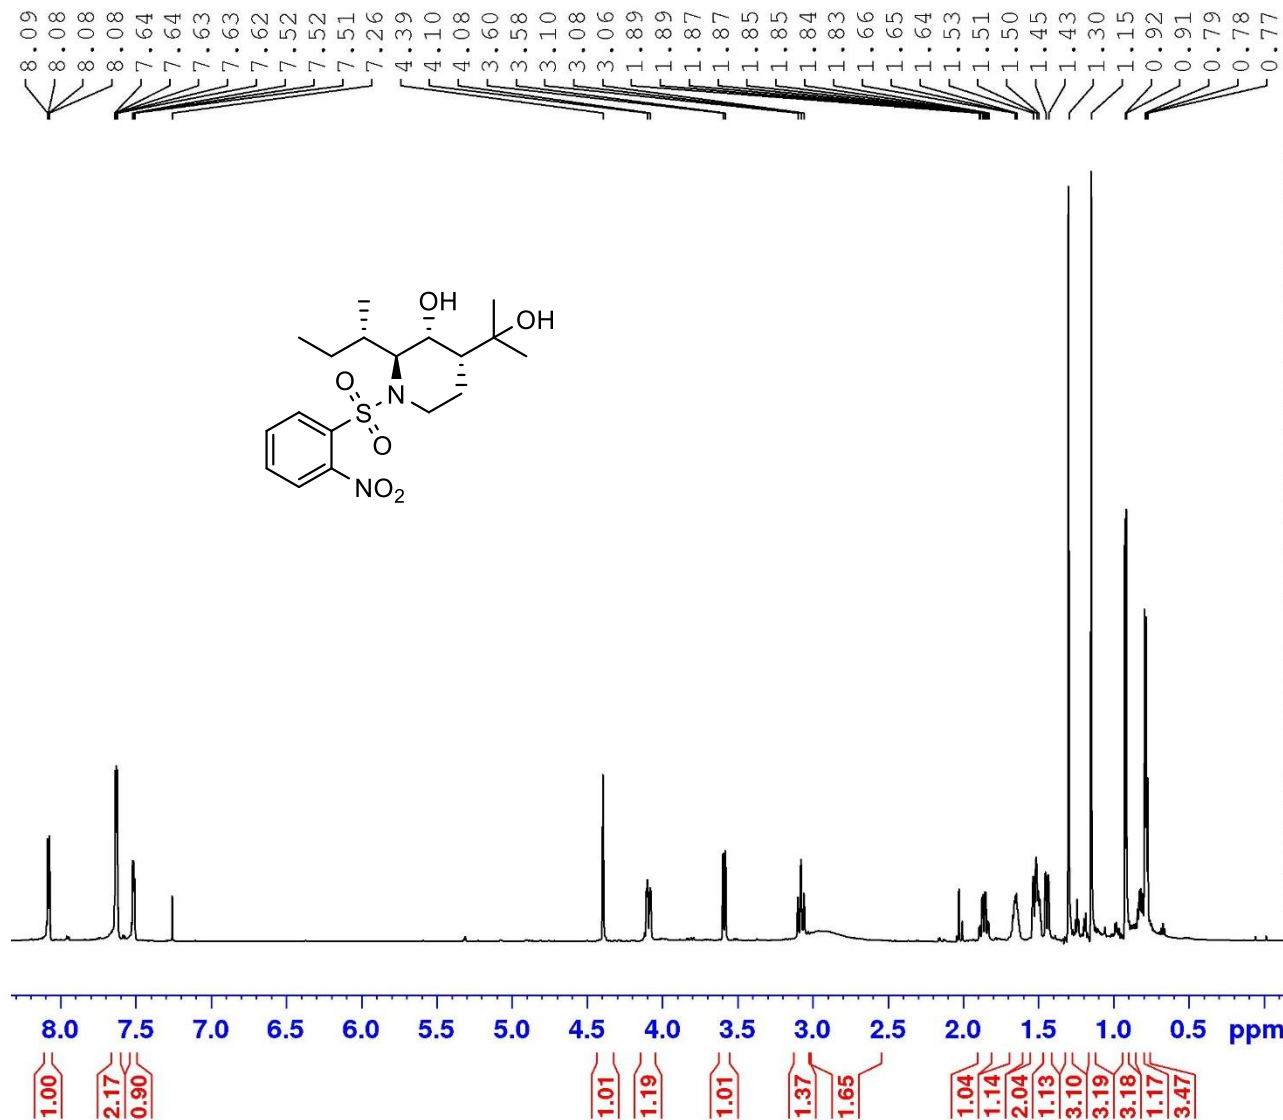

<sup>1</sup>H-NMR (R,R)-31e

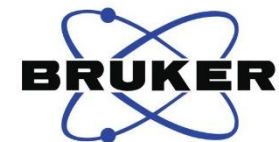

Current Data Parameters  
 NAME Aug04-2020  
 EXPNO 51  
 PROCNO 1

F2 - Acquisition Parameters  
 Date\_ 20200804  
 Time 15.21  
 INSTRUM spect  
 PROBHD 5 mm CPQCI 1H-  
 PULPROG zgpg30  
 TD 65356  
 SOLVENT CDCl3  
 NS 512  
 DS 4  
 SWH 40760.871 Hz  
 FIDRES 0.623675 Hz  
 AQ 0.8017003 sec  
 RG 182.53  
 DW 12.267 usec  
 DE 18.00 usec  
 TE 298.0 K  
 D1 2.0000000 sec  
 D11 0.0300000 sec  
 TD0 1

===== CHANNEL f1 =====  
 SFO1 176.1232717 MHz  
 NUC1 13C  
 P1 12.00 usec  
 PLW1 105.0000000 W

===== CHANNEL f2 =====  
 SFO2 700.3628014 MHz  
 NUC2 1H  
 CPDPRG[2] waltz16  
 PCPD2 65.00 usec  
 PLW2 9.89999962 W  
 PLW12 0.15564001 W  
 PLW13 0.07837200 W

F2 - Processing parameters  
 SI 131072  
 SF 176.1056620 MHz  
 WDW EM  
 SSB 0  
 LB 1.00 Hz  
 GB 0  
 PC 1.40

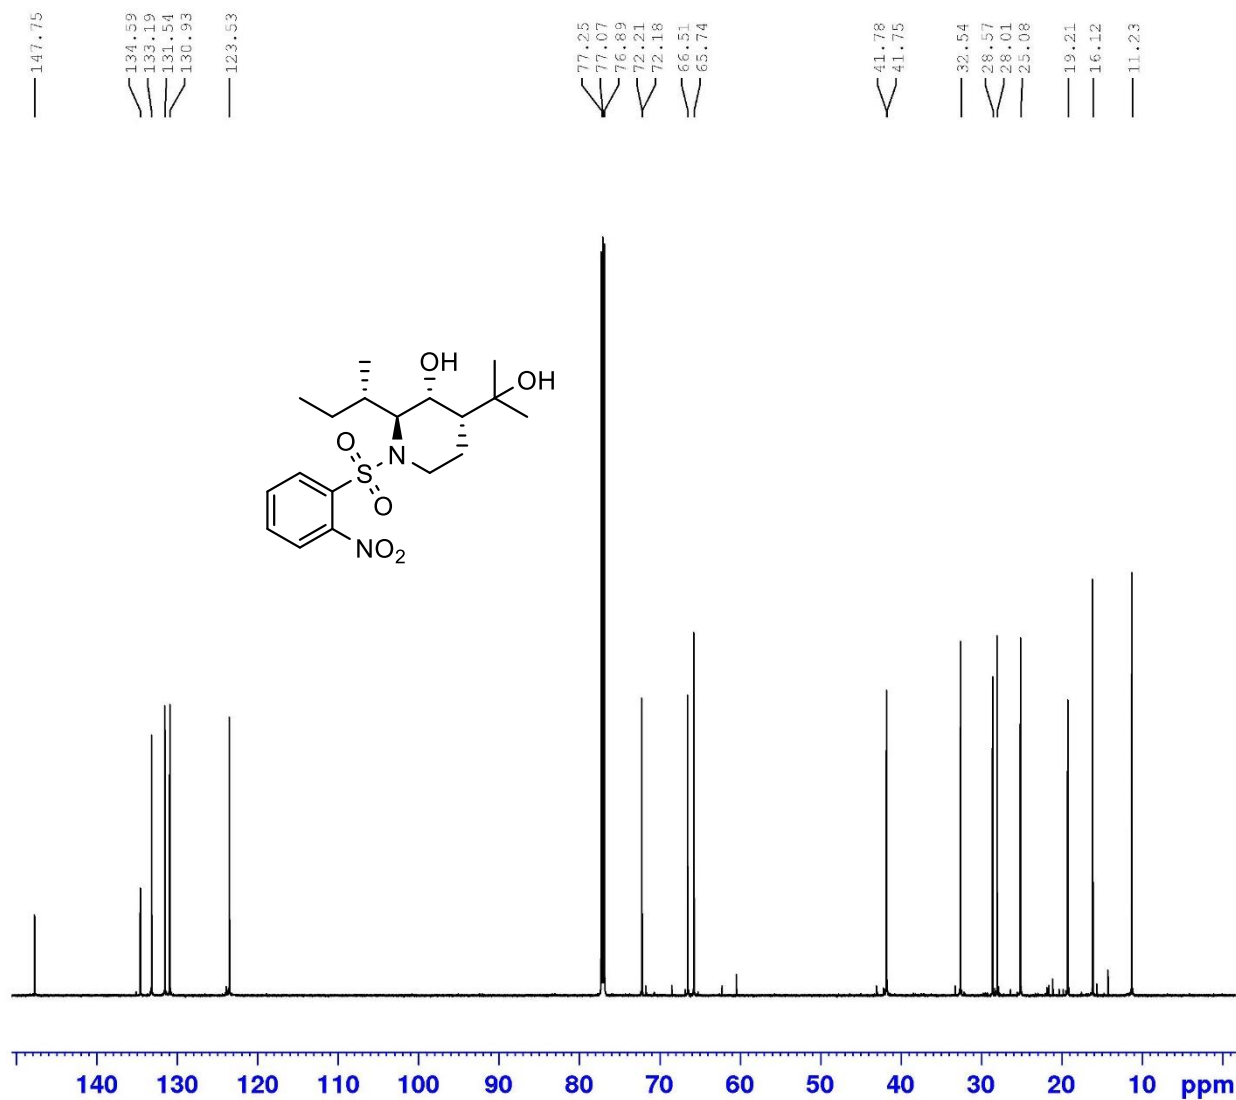

<sup>13</sup>C-NMR (R,R)-31e

7.26

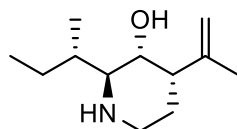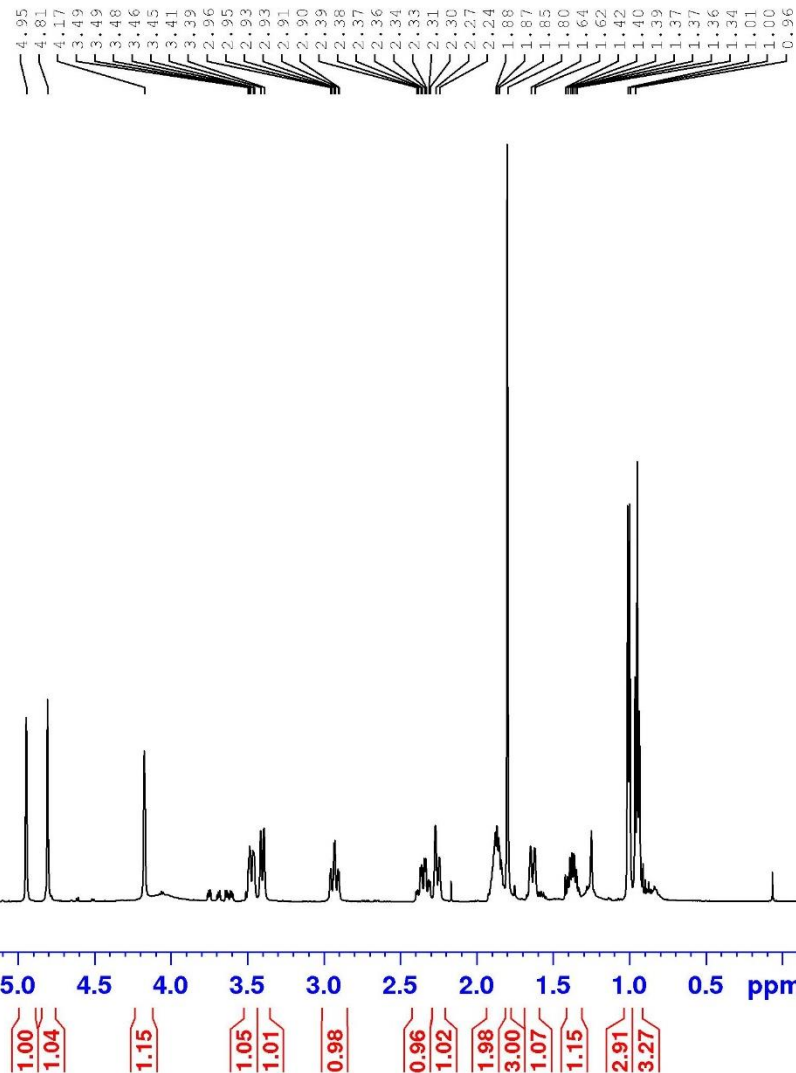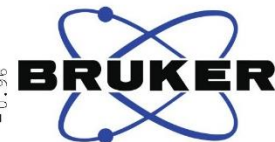

Current Data Parameters  
 NAME Mar03-2021  
 EXPNO 50  
 PROCNO 1

F2 - Acquisition Parameters  
 Date\_ 20210303  
 Time 11.44  
 INSTRUM spect  
 PROBHD 5 mm PABBO BB-  
 PULPROG zg30  
 TD 32768  
 SOLVENT CDCl3  
 NS 32  
 DS 0  
 SWH 10330.578 Hz  
 FIDRES 0.315264 Hz  
 AQ 1.5859712 sec  
 RG 256  
 DW 48.400 usec  
 DE 10.00 usec  
 TE 296.0 K  
 D1 2.00000000 sec  
 TD0 1

===== CHANNEL f1 =====  
 NUC1 1H  
 P1 11.23 usec  
 PL1 1.00 dB  
 PL1W 19.75309753 W  
 SFO1 500.1560886 MHz

F2 - Processing parameters  
 SI 16384  
 SF 500.1530162 MHz  
 WDW EM  
 SSB 0  
 LB 0.30 Hz  
 GB 0  
 PC 1.00

<sup>1</sup>H-NMR (R,S)-32e

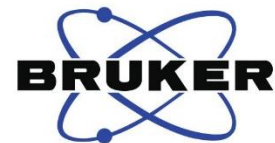

Current Data Parameters  
 NAME Jan26-2021  
 EXPNO 61  
 PROCNO 1

F2 - Acquisition Parameters  
 Date\_ 20210126  
 Time 17.21  
 INSTRUM spect  
 PROBHD 5 mm PABBO BB-  
 PULPROG zgpg30  
 TD 65536  
 SOLVENT CDCl3  
 NS 1024  
 DS 4  
 SWH 32894.738 Hz  
 FIDRES 0.501934 Hz  
 AQ 0.9961472 sec  
 RG 2580  
 DW 15.200 usec  
 DE 10.00 usec  
 TE 296.8 K  
 D1 2.00000000 sec  
 D11 0.03000000 sec  
 TD0 1

===== CHANNEL f1 =====  
 NUC1 13C  
 P1 10.20 usec  
 PL1 1.50 dB  
 PL1W 51.74793243 W  
 SFO1 125.7761482 MHz

===== CHANNEL f2 =====  
 CPDPRG2 waltz16  
 NUC2 1H  
 PCPD2 100.00 usec  
 PL2 1.00 dB  
 PL12 19.99 dB  
 PL13 21.00 dB  
 PL2W 19.75309753 W  
 PL12W 0.24925002 W  
 PL13W 0.19753097 W  
 SFO2 500.1550006 MHz

F2 - Processing parameters  
 SI 32768  
 SF 125.7635720 MHz  
 WDW EM  
 SSB 0  
 LB 1.00 Hz  
 GB 0  
 PC 1.40

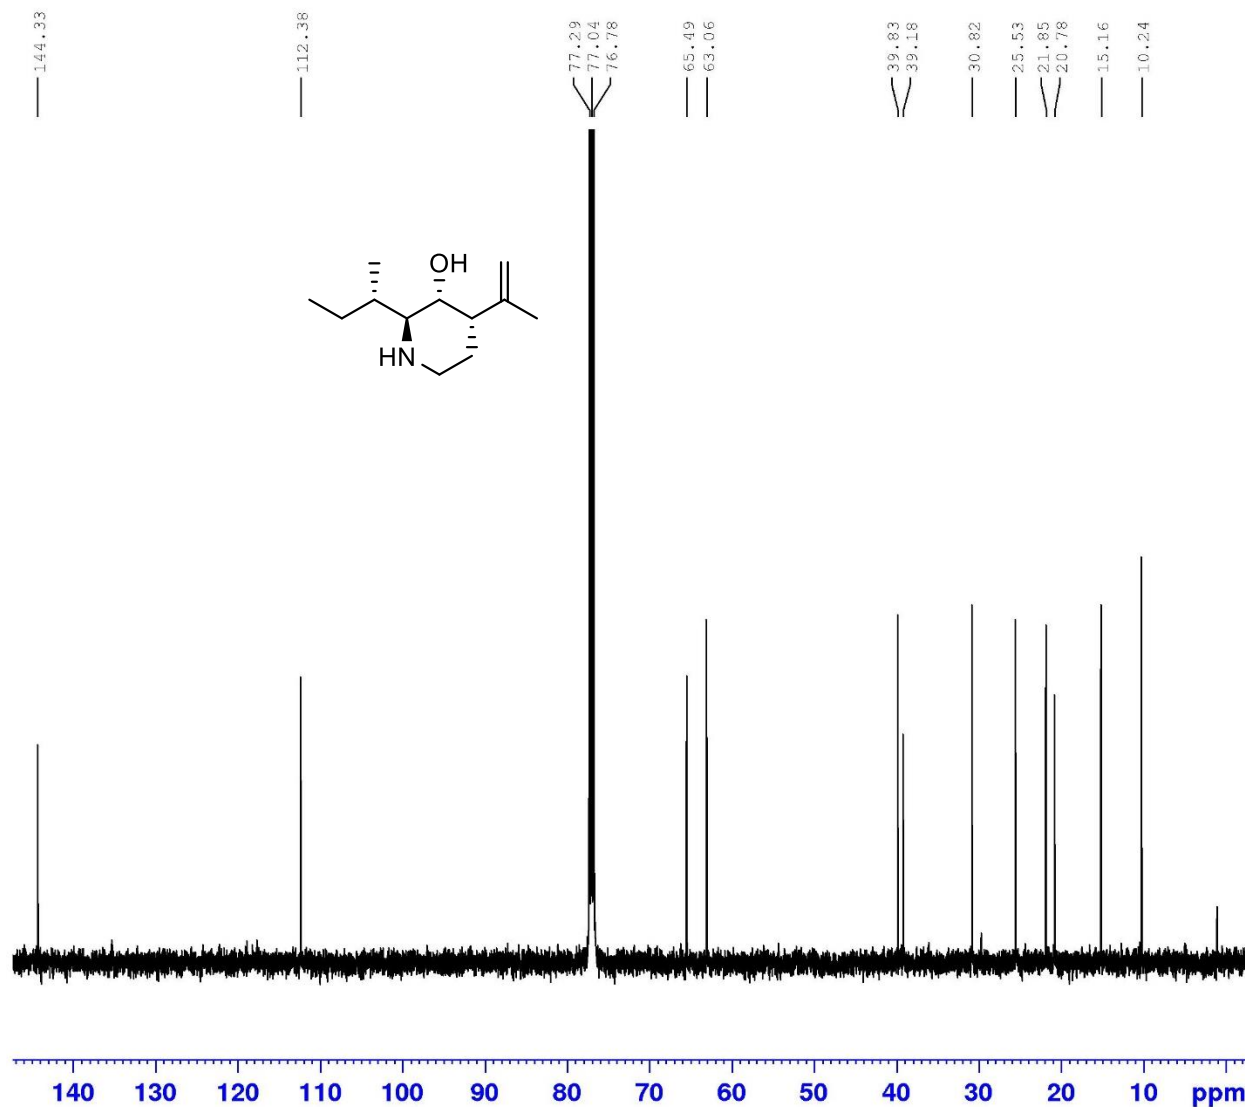

<sup>13</sup>C-NMR (R,S)-32e

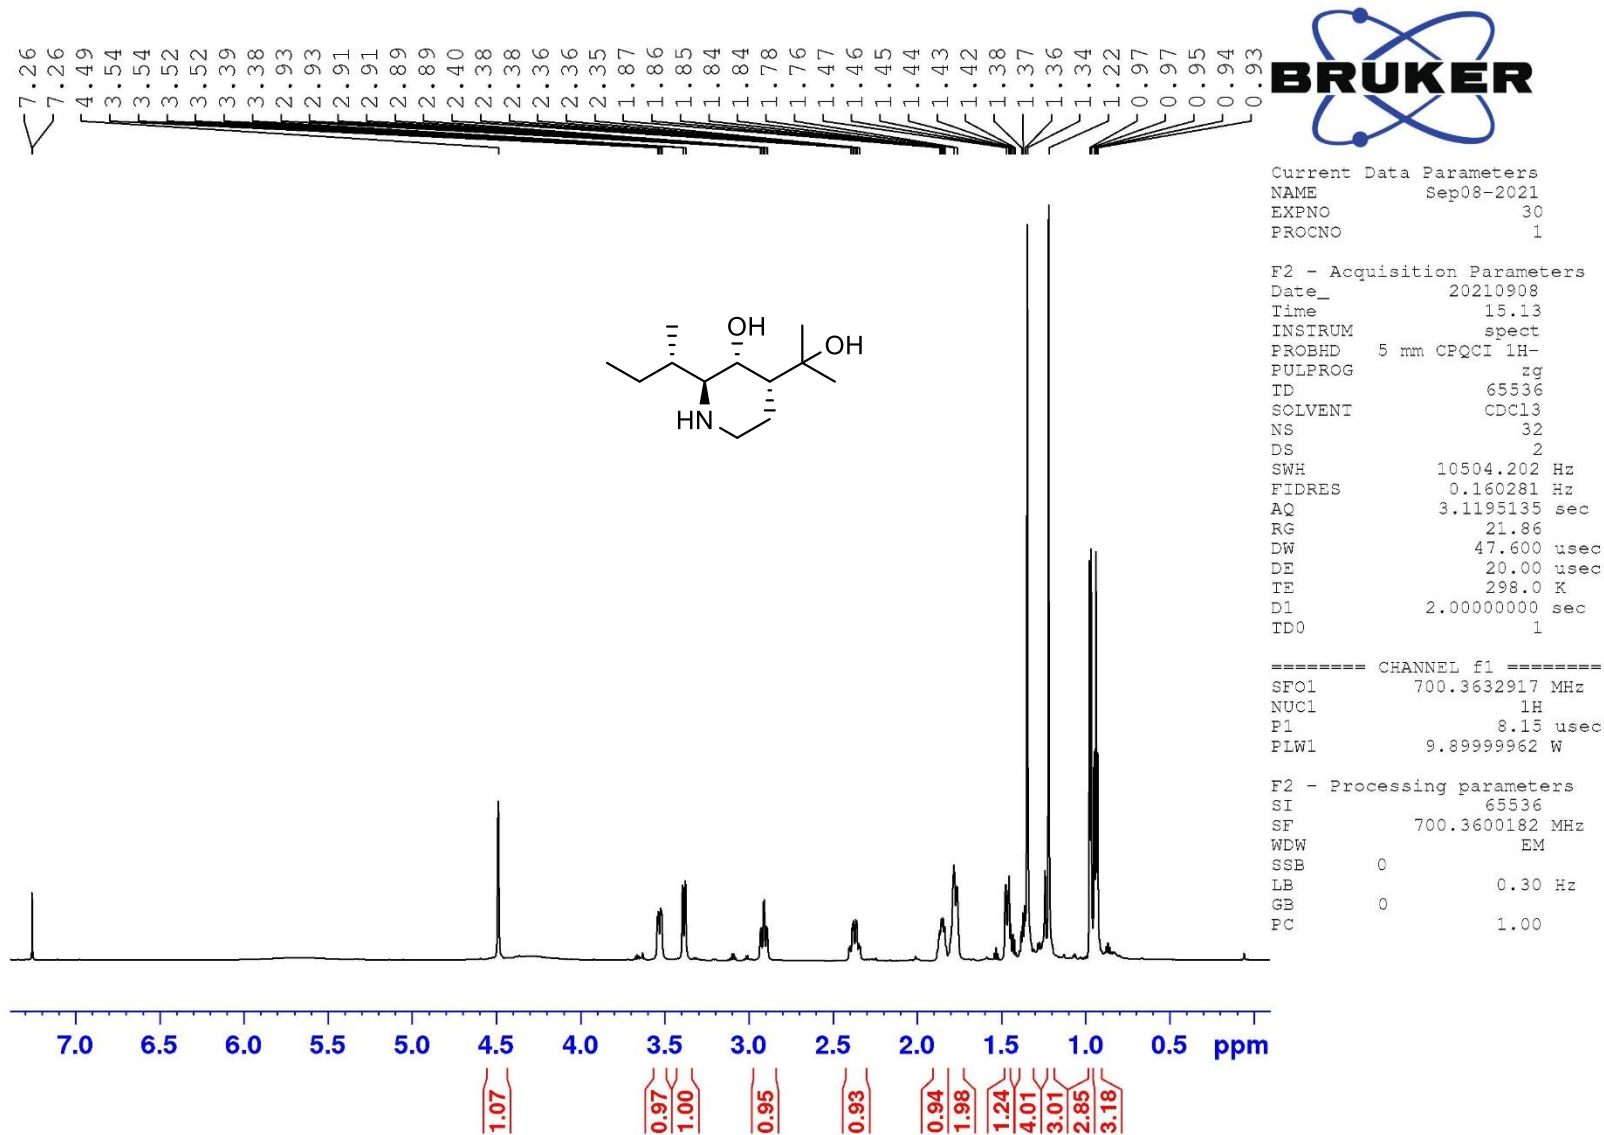

<sup>1</sup>H-NMR (R,R)-33e

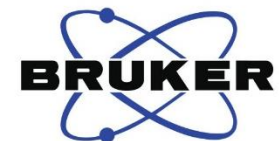

Current Data Parameters  
 NAME Sep08-2021  
 EXPNO 31  
 PROCNO 1

F2 - Acquisition Parameters  
 Date\_ 20210908  
 Time 16.54  
 INSTRUM spect  
 PROBHD 5 mm CPQCI 1H-  
 PULPROG zgpg30  
 TD 65356  
 SOLVENT CDCl3  
 NS 2048  
 DS 4  
 SWH 40760.871 Hz  
 FIDRES 0.623675 Hz  
 AQ 0.8017003 sec  
 RG 182.53  
 DW 12.267 usec  
 DE 18.00 usec  
 TE 298.0 K  
 D1 2.00000000 sec  
 D11 0.03000000 sec  
 TD0 1

===== CHANNEL f1 =====  
 SFO1 176.1232717 MHz  
 NUC1 13C  
 P1 12.00 usec  
 PLW1 105.00000000 W

===== CHANNEL f2 =====  
 SFO2 700.3628014 MHz  
 NUC2 1H  
 CPDPRG[2] waltz16  
 PCPD2 65.00 usec  
 PLW2 9.89999962 W  
 PLW12 0.15564001 W  
 PLW13 0.07837200 W

F2 - Processing parameters  
 SI 131072  
 SF 176.1056620 MHz  
 WDW EM  
 SSB 0  
 LB 1.00 Hz  
 GB 0  
 PC 1.40

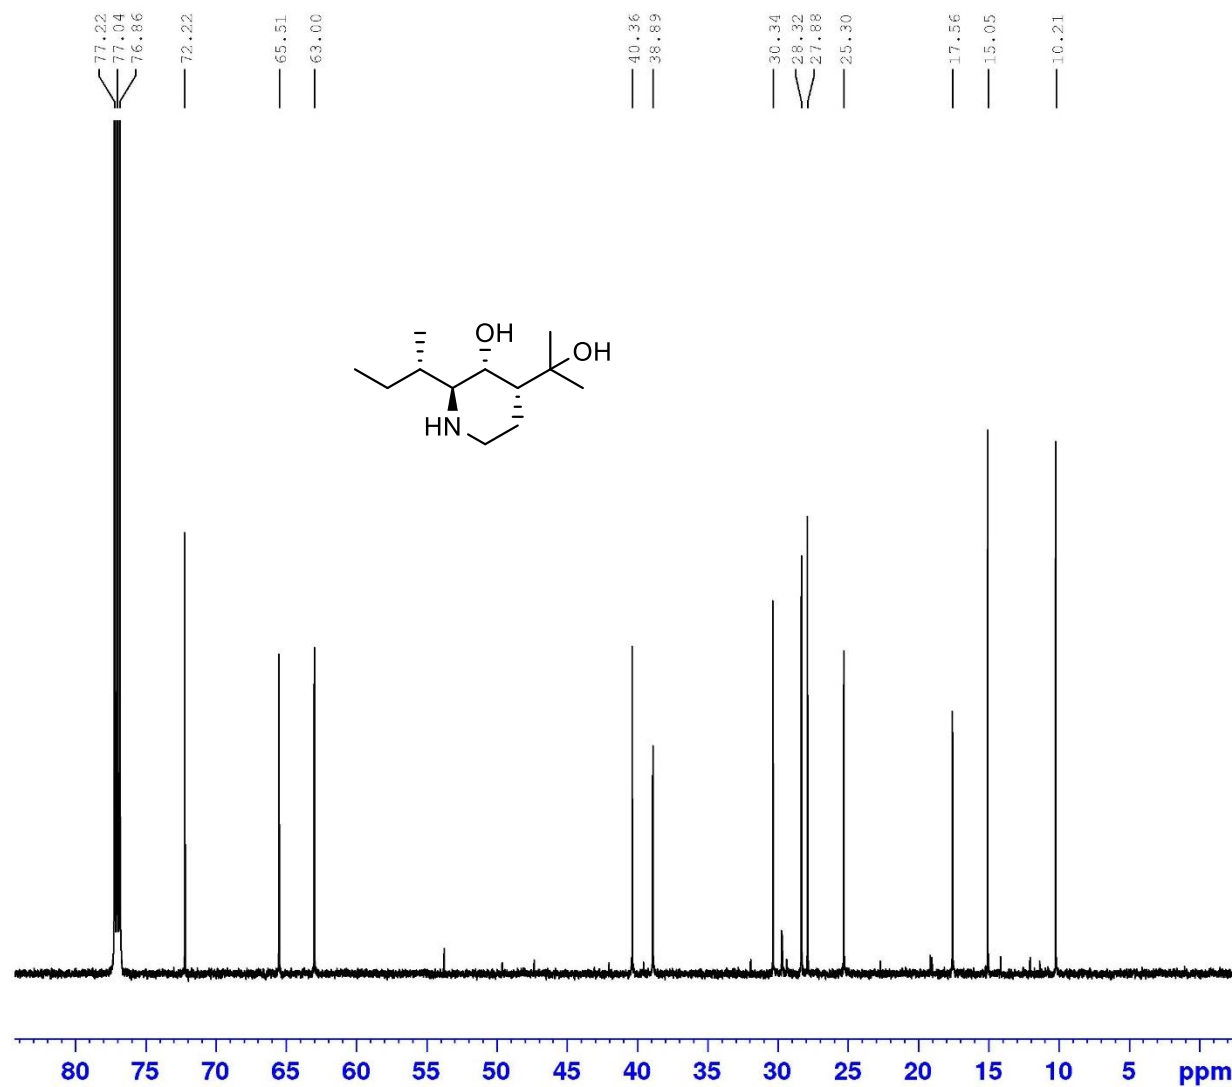

<sup>13</sup>C-NMR (R,R)-33e

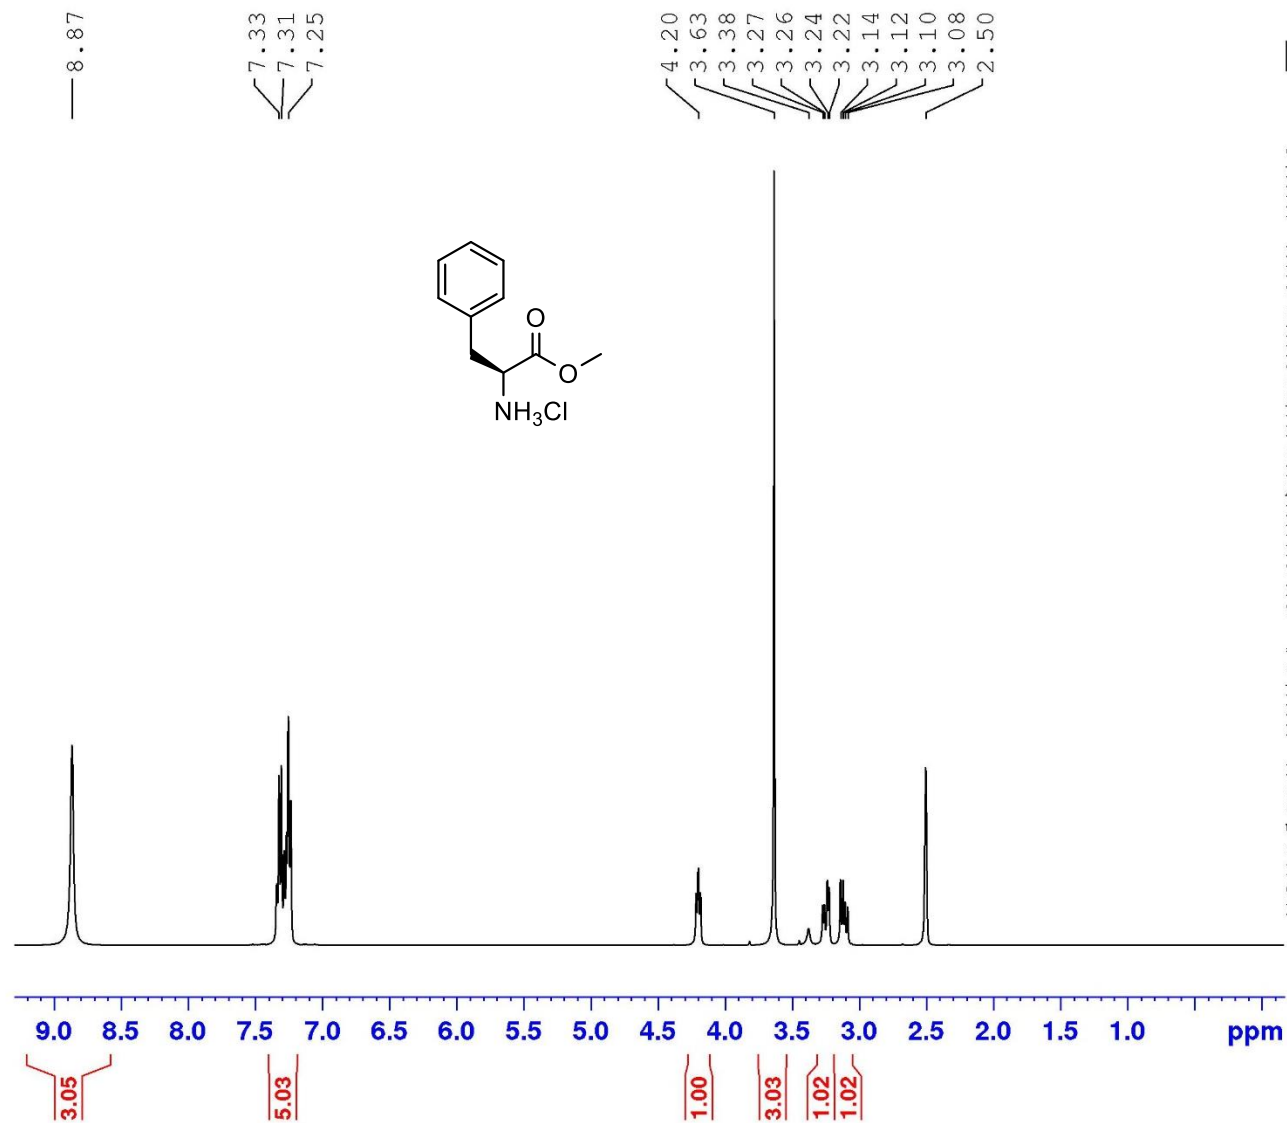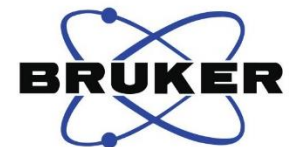

Current Data Parameters  
NAME Mar10-2020  
EXPNO 350  
PROCNO 1

F2 - Acquisition Parameters  
Date\_ 20200310  
Time 13.46  
INSTRUM spect  
PROBHD 5 mm PABBO BB/  
PULPROG zg30  
TD 65536  
SOLVENT DMSO  
NS 16  
DS 2  
SWH 8012.820 Hz  
FIDRES 0.122266 Hz  
AQ 4.0894465 sec  
RG 90.96  
DW 62.400 usec  
DE 6.50 usec  
TE 298.0 K  
D1 1.00000000 sec  
TD0 1

===== CHANNEL f1 =====  
SFO1 400.1024708 MHz  
NUC1 1H  
P1 13.70 usec  
PLW1 12.00000000 W

F2 - Processing parameters  
SI 65536  
SF 400.1000000 MHz  
WDW EM  
SSB 0  
LB 0.30 Hz  
GB 0  
PC 1.00

<sup>1</sup>H-NMR 25f

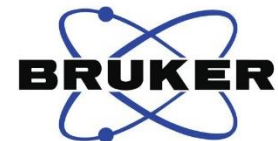

Current Data Parameters  
NAME Mar10-2020  
EXPNO 351  
PROCNO 1

F2 - Acquisition Parameters  
Date\_ 20200311  
Time 2.07  
INSTRUM spect  
PROBHD 5 mm PABBO BB/  
PULPROG zgpg30  
TD 65536  
SOLVENT DMSO  
NS 512  
DS 4  
SWH 24038.461 Hz  
FIDRES 0.366798 Hz  
AQ 1.3631488 sec  
RG 205.35  
DW 20.800 usec  
DE 6.50 usec  
TE 298.0 K  
D1 2.00000000 sec  
D11 0.03000000 sec  
TD0 1

===== CHANNEL f1 =====  
SFO1 100.6152851 MHz  
NUC1 13C  
P1 10.00 usec  
PLW1 48.00000000 W

===== CHANNEL f2 =====  
SFO2 400.1016004 MHz  
NUC2 1H  
CPDPRG[2] waltz16  
PCPD2 90.00 usec  
PLW2 12.00000000 W  
PLW12 0.27805999 W  
PLW13 0.22522999 W

F2 - Processing parameters  
SI 32768  
SF 100.6052749 MHz  
WDW EM  
SSB 0  
LB 1.00 Hz  
GB 0  
PC 1.40

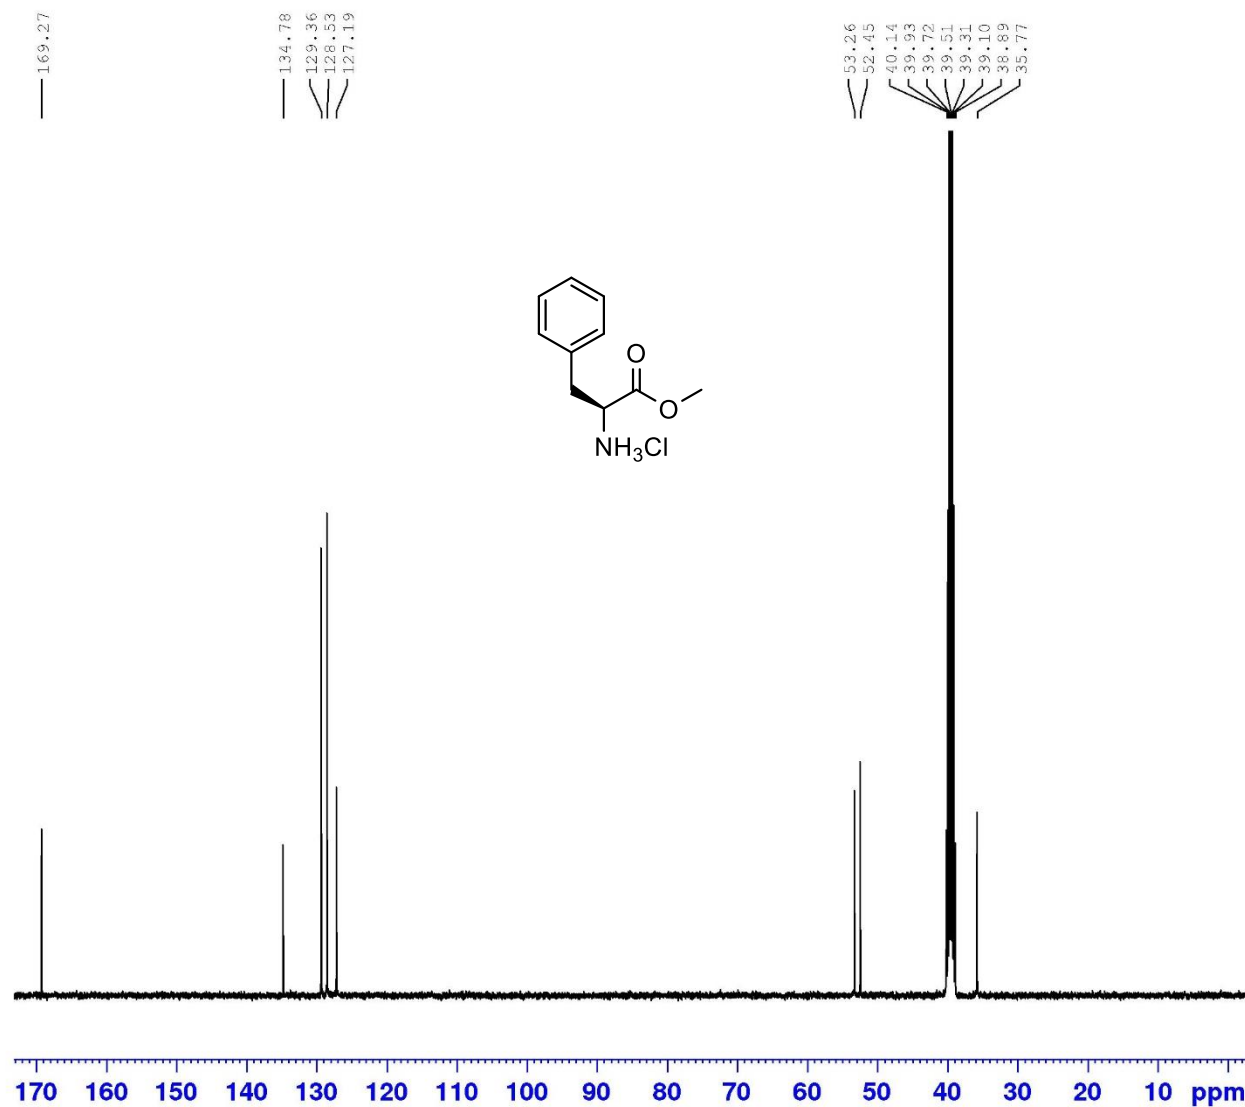

<sup>13</sup>C-NMR 25f

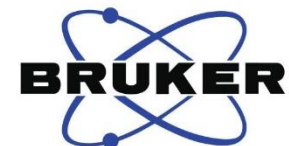

Current Data Parameters  
 NAME Jan14-2020  
 EXPNO 510  
 PROCNO 1

F2 - Acquisition Parameters  
 Date\_ 20200114  
 Time 16.28  
 INSTRUM spect  
 PROBHD 5 mm PABBO BB/  
 PULPROG zg30  
 TD 65536  
 SOLVENT CDCl3  
 NS 16  
 DS 2  
 SWH 8012.820 Hz  
 FIDRES 0.122266 Hz  
 AQ 4.0894465 sec  
 RG 182.64  
 DW 62.400 usec  
 DE 6.50 usec  
 TE 298.0 K  
 D1 1.00000000 sec  
 TDO 1

===== CHANNEL f1 =====  
 SFO1 400.1024708 MHz  
 NUC1 1H  
 P1 13.70 usec  
 PLW1 12.00000000 W

F2 - Processing parameters  
 SI 65536  
 SF 400.1000098 MHz  
 WDW EM  
 SSB 0  
 LB 0.30 Hz  
 GB 0  
 PC 1.00

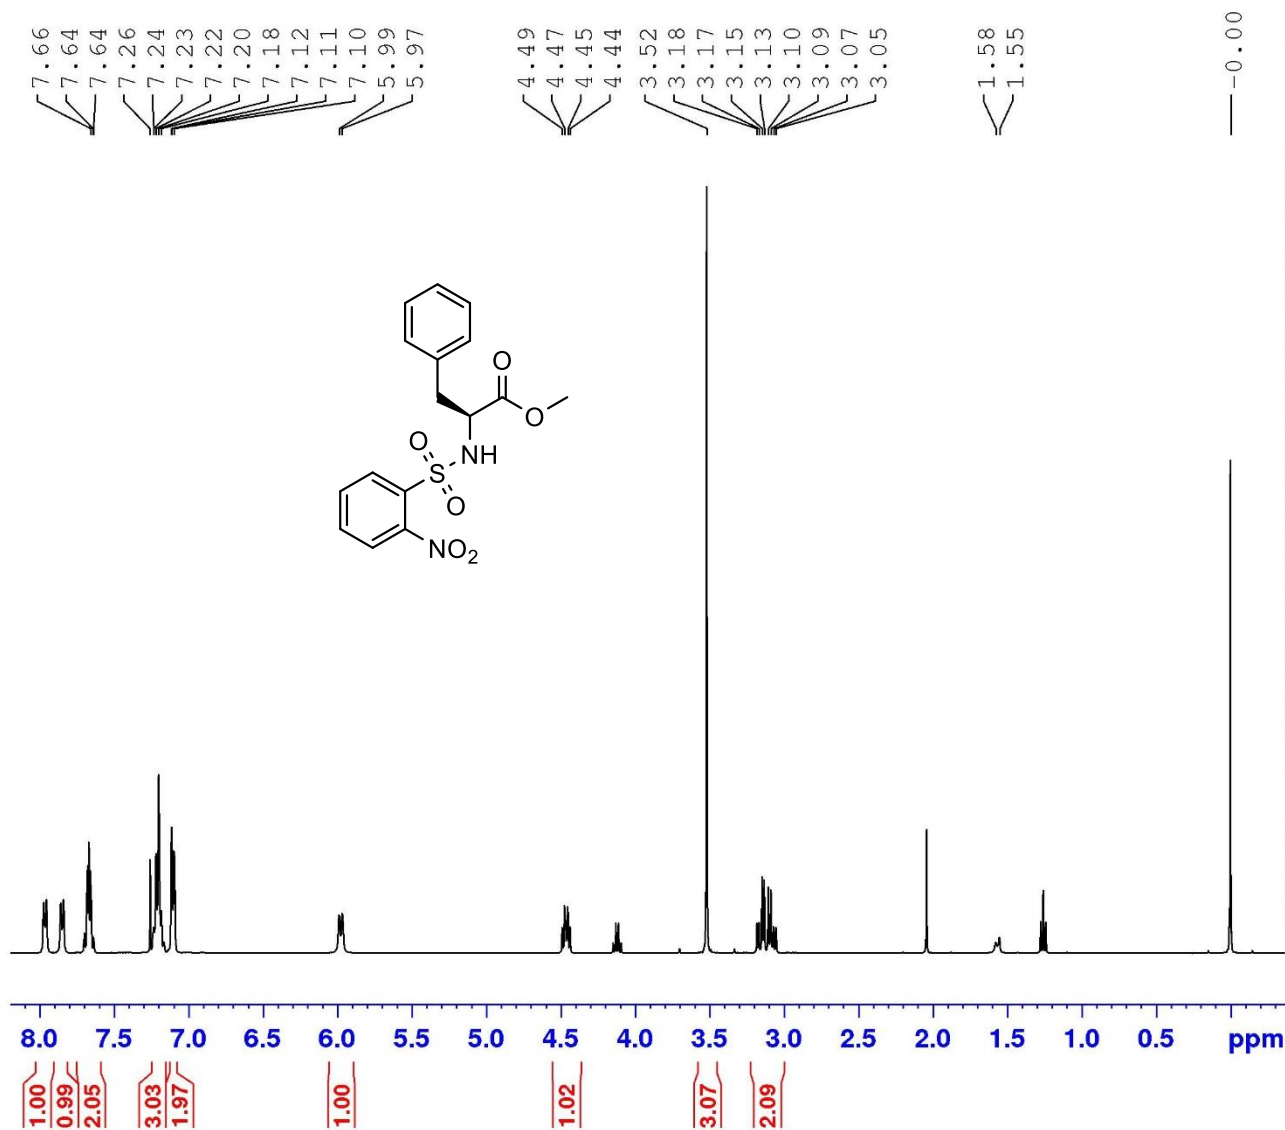

<sup>1</sup>H-NMR 26f

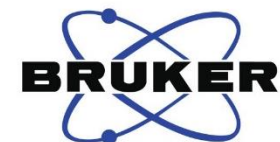

Current Data Parameters  
NAME Jan14-2020  
EXPNO 511  
PROCNO 1

F2 - Acquisition Parameters  
Date\_ 20200114  
Time 22.14  
INSTRUM spect  
PROBHD 5 mm PABBO BB/  
PULPROG zgpg30  
TD 65536  
SOLVENT CDCl3  
NS 512  
DS 4  
SWH 24038.461 Hz  
FIDRES 0.366798 Hz  
AQ 1.3631488 sec  
RG 205.35  
DW 20.800 usec  
DE 6.50 usec  
TE 298.0 K  
D1 2.00000000 sec  
D11 0.03000000 sec  
TD0 1

===== CHANNEL f1 =====  
SFO1 100.6152851 MHz  
NUC1 13C  
P1 10.00 usec  
PLW1 48.00000000 W

===== CHANNEL f2 =====  
SFO2 400.1016004 MHz  
NUC2 1H  
CPDPRG[2] waltz16  
PCPD2 90.00 usec  
PLW2 12.00000000 W  
PLW12 0.27805999 W  
PLW13 0.22522999 W

F2 - Processing parameters  
SI 32768  
SF 100.6052247 MHz  
WDW EM  
SSB 0  
LB 1.00 Hz  
GB 0  
PC 1.40

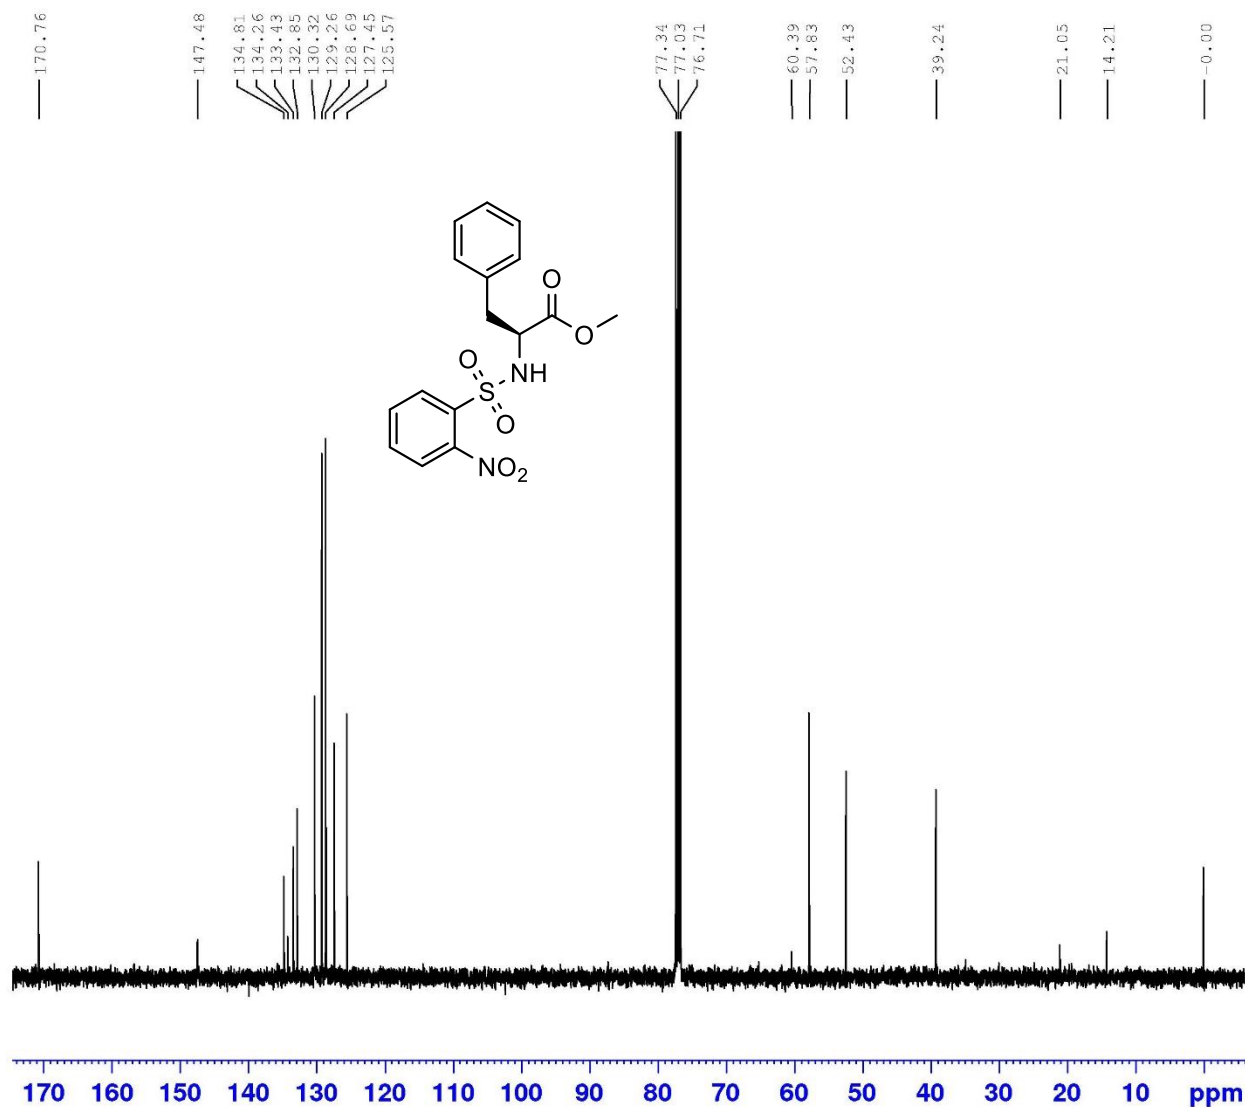

<sup>13</sup>C-NMR 26f

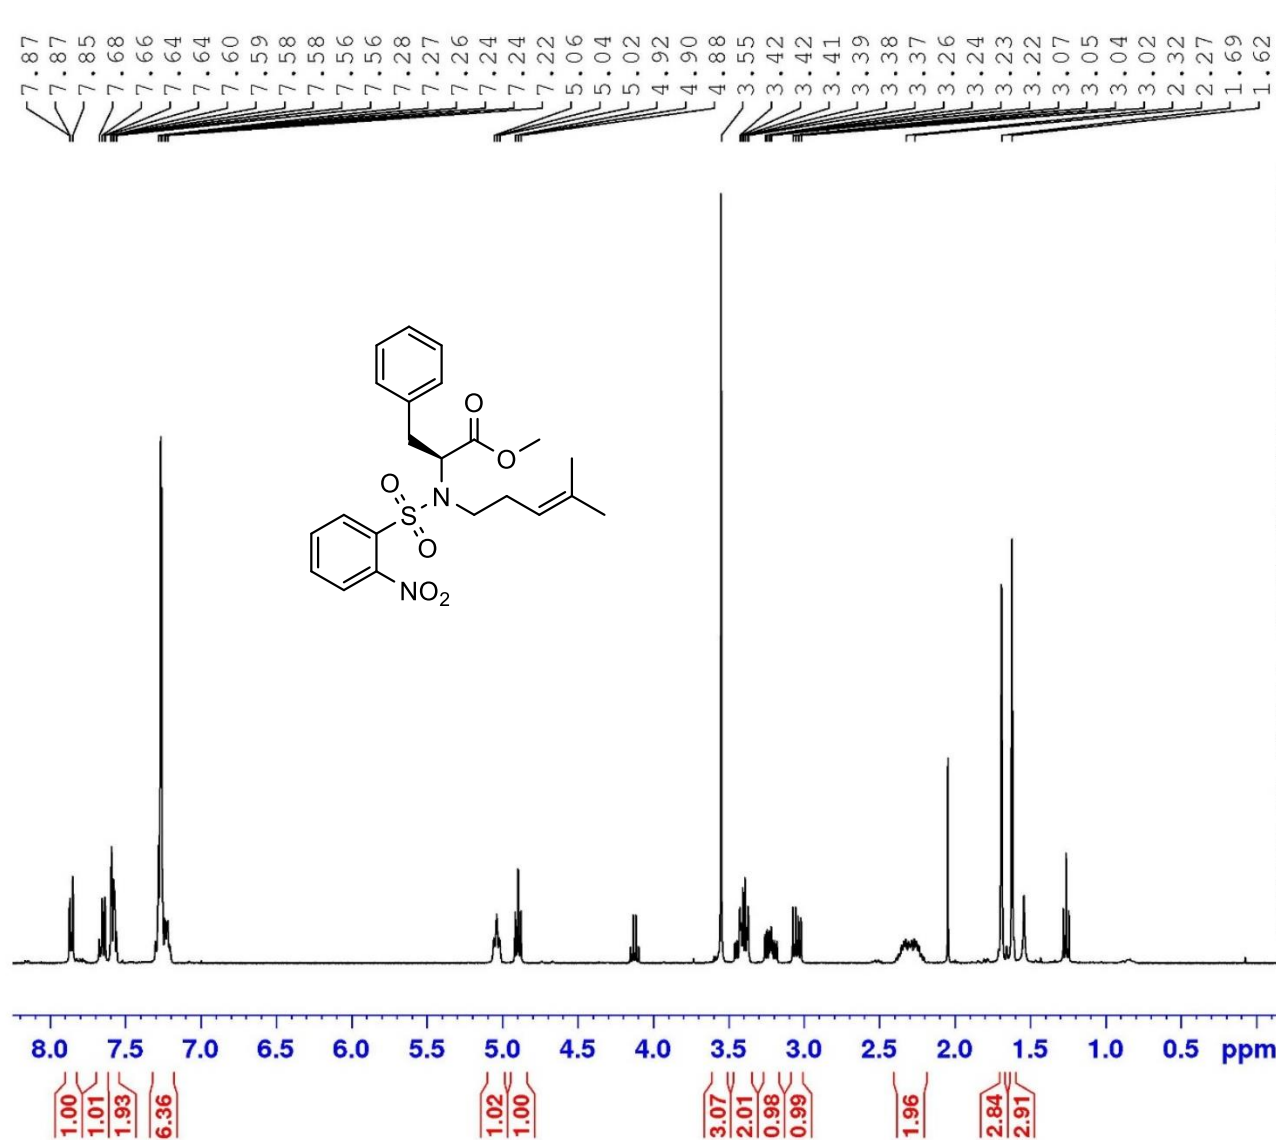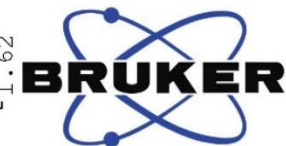

Current Data Parameters  
 NAME Feb05-2020  
 EXPNO 550  
 PROCNO 1

F2 - Acquisition Parameters  
 Date\_ 20200205  
 Time 17.43  
 INSTRUM spect  
 PROBHD 5 mm PABBO BB/  
 PULPROG zg30  
 TD 65536  
 SOLVENT CDC13  
 NS 16  
 DS 2  
 SWH 8012.820 Hz  
 FIDRES 0.122266 Hz  
 AQ 4.0894465 sec  
 RG 205.35  
 DW 62.400 usec  
 DE 6.50 usec  
 TE 298.0 K  
 D1 1.00000000 sec  
 TDC 1

===== CHANNEL f1 =====  
 SFO1 400.1024708 MHz  
 NUC1 1H  
 P1 13.70 usec  
 PLW1 12.00000000 W

F2 - Processing parameters  
 SI 65536  
 SF 400.1000090 MHz  
 WDW EM  
 SSB 0  
 LB 0.30 Hz  
 GB 0  
 PC 1.00

<sup>1</sup>H-NMR 27f

S210

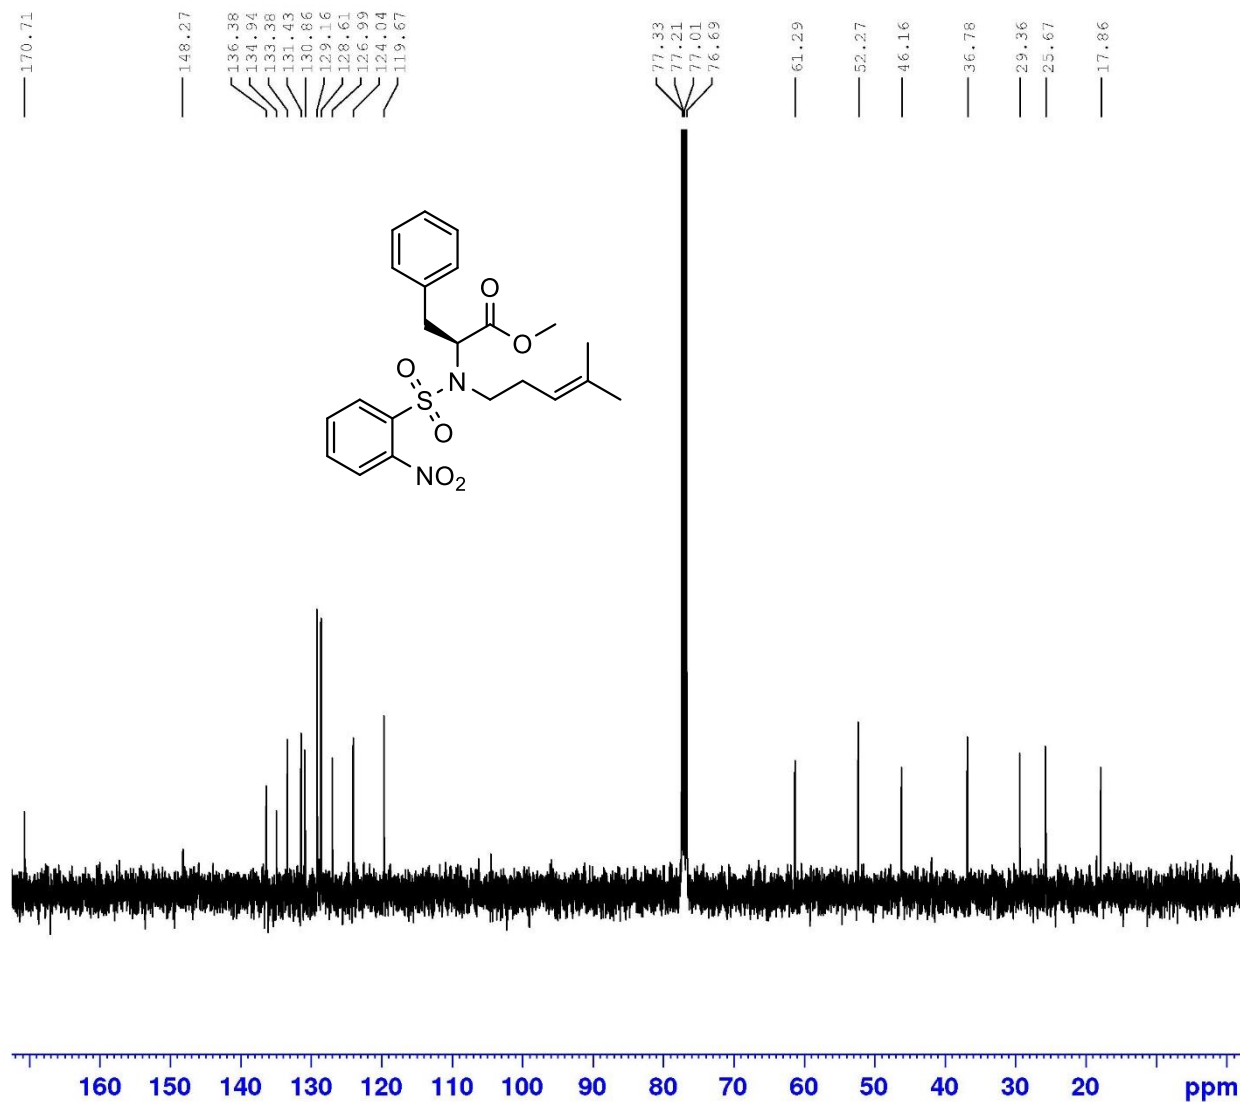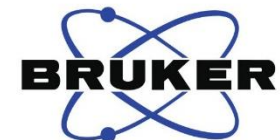

Current Data Parameters  
 NAME Feb05-2020  
 EXPNO 551  
 PROCNO 1

F2 - Acquisition Parameters  
 Date\_ 20200205  
 Time 20.34  
 INSTRUM spect  
 PROBHD 5 mm PABBO BB/  
 PULPROG zgpg30  
 TD 65536  
 SOLVENT CDCl3  
 NS 512  
 DS 4  
 SWH 24038.461 Hz  
 FIDRES 0.366798 Hz  
 AQ 1.3631488 sec  
 RG 205.35  
 DW 20.800 usec  
 DE 6.50 usec  
 TE 298.0 K  
 D1 2.00000000 sec  
 D11 0.03000000 sec  
 TD0 1

===== CHANNEL f1 =====  
 SFO1 100.6152851 MHz  
 NUC1 13C  
 P1 10.00 usec  
 PLW1 48.00000000 W

===== CHANNEL f2 =====  
 SFO2 400.1016004 MHz  
 NUC2 1H  
 CPDPRG[2] waltz16  
 PCPD2 90.00 usec  
 PLW2 12.00000000 W  
 PLW12 0.27805999 W  
 PLW13 0.22522999 W

F2 - Processing parameters  
 SI 32768  
 SF 100.6052250 MHz  
 WDW EM  
 SSB 0  
 LB 1.00 Hz  
 GB 0  
 PC 1.40

<sup>13</sup>C-NMR 27f

S211

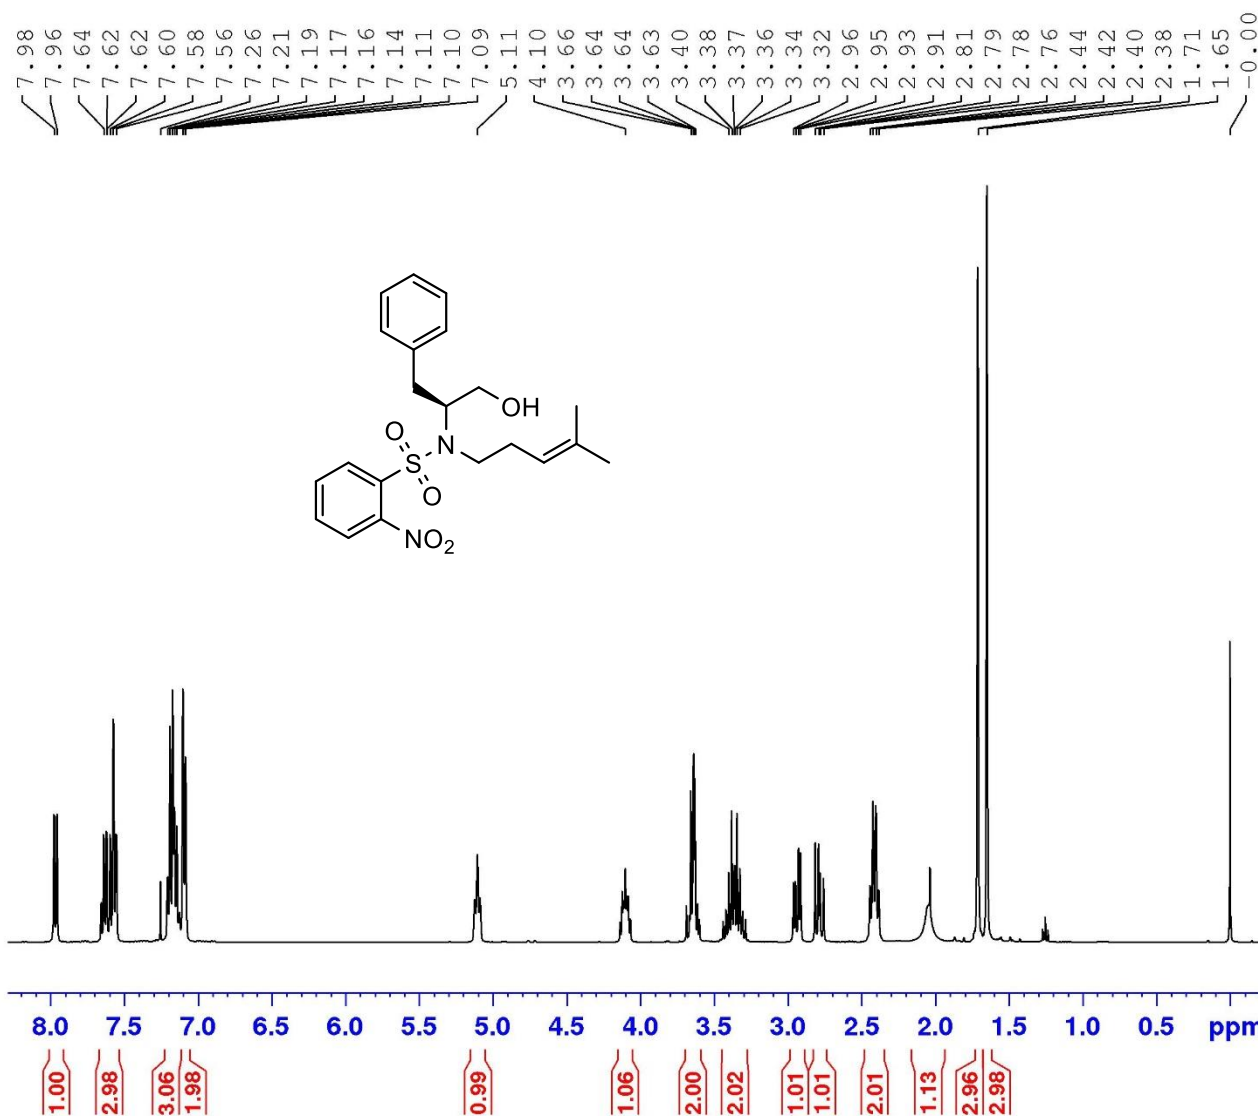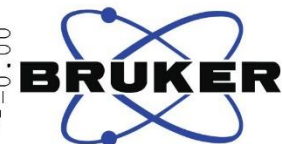

Current Data Parameters  
 NAME Feb25-2020  
 EXPNO 480  
 PROCNO 1

F2 - Acquisition Parameters  
 Date\_ 20200225  
 Time 16.09  
 INSTRUM spect  
 PROBHD 5 mm PABBO BB/  
 PULPROG zg30  
 TD 65536  
 SOLVENT CDCl3  
 NS 16  
 DS 2  
 SWH 8012.820 Hz  
 FIDRES 0.122266 Hz  
 AQ 4.0894465 sec  
 RG 68.93  
 DW 62.400 usec  
 DE 6.50 usec  
 TE 298.0 K  
 D1 1.00000000 sec  
 TDO 1

===== CHANNEL f1 =====  
 SFO1 400.1024708 MHz  
 NUC1 1H  
 P1 13.70 usec  
 PLW1 12.00000000 W

F2 - Processing parameters  
 SI 65536  
 SF 400.1000111 MHz  
 WDW EM  
 SSB 0  
 LB 0.30 Hz  
 GB 0  
 PC 1.00

<sup>1</sup>H-NMR 28f

S212

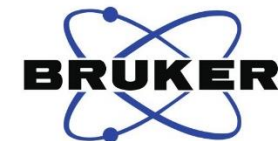

Current Data Parameters  
 NAME Feb25-2020  
 EXPNO 481  
 PROCNO 1

F2 - Acquisition Parameters  
 Date\_ 20200226  
 Time 1.19  
 INSTRUM spect  
 PROBHD 5 mm PABBO BB/  
 PULPROG zgpg30  
 TD 65536  
 SOLVENT CDCl3  
 NS 512  
 DS 4  
 SWH 24038.461 Hz  
 FIDRES 0.366798 Hz  
 AQ 1.3631488 sec  
 RG 205.35  
 DW 20.800 usec  
 DE 6.50 usec  
 TE 298.0 K  
 D1 2.00000000 sec  
 D11 0.03000000 sec  
 TD0 1

===== CHANNEL f1 =====  
 SFO1 100.6152851 MHz  
 NUC1 13C  
 P1 10.00 usec  
 PLW1 48.00000000 W

===== CHANNEL f2 =====  
 SFO2 400.1016004 MHz  
 NUC2 1H  
 CPDPRG[2] waltz16  
 PCPD2 90.00 usec  
 PLW2 12.00000000 W  
 PLW12 0.27805999 W  
 PLW13 0.22522999 W

F2 - Processing parameters  
 SI 32768  
 SF 100.6052260 MHz  
 WDW EM  
 SSB 0  
 LB 1.00 Hz  
 GB 0  
 PC 1.40

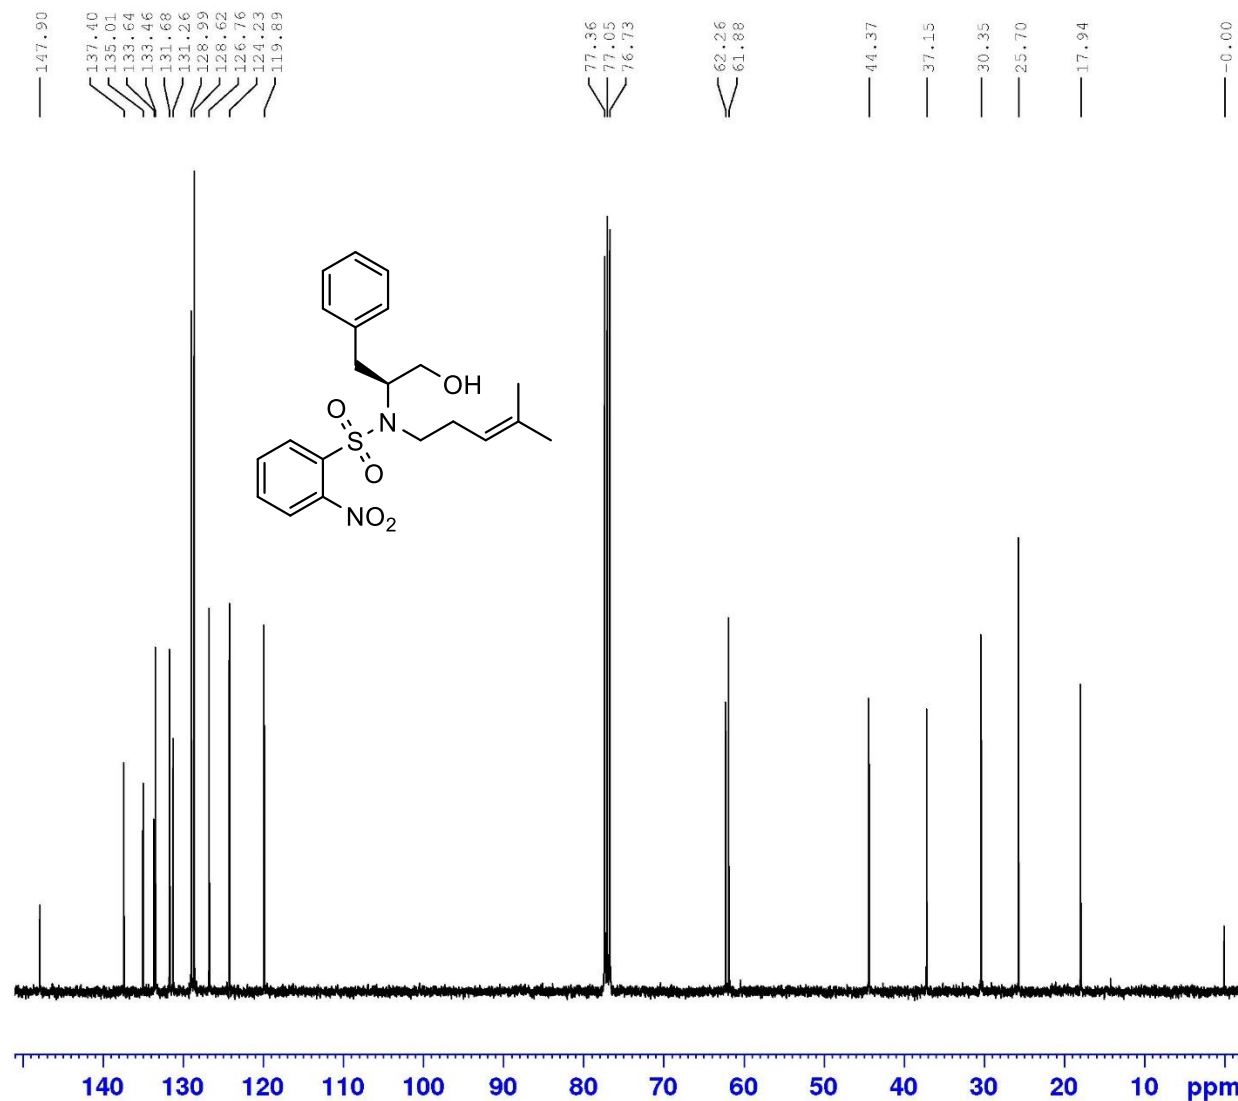

<sup>13</sup>C-NMR 28f

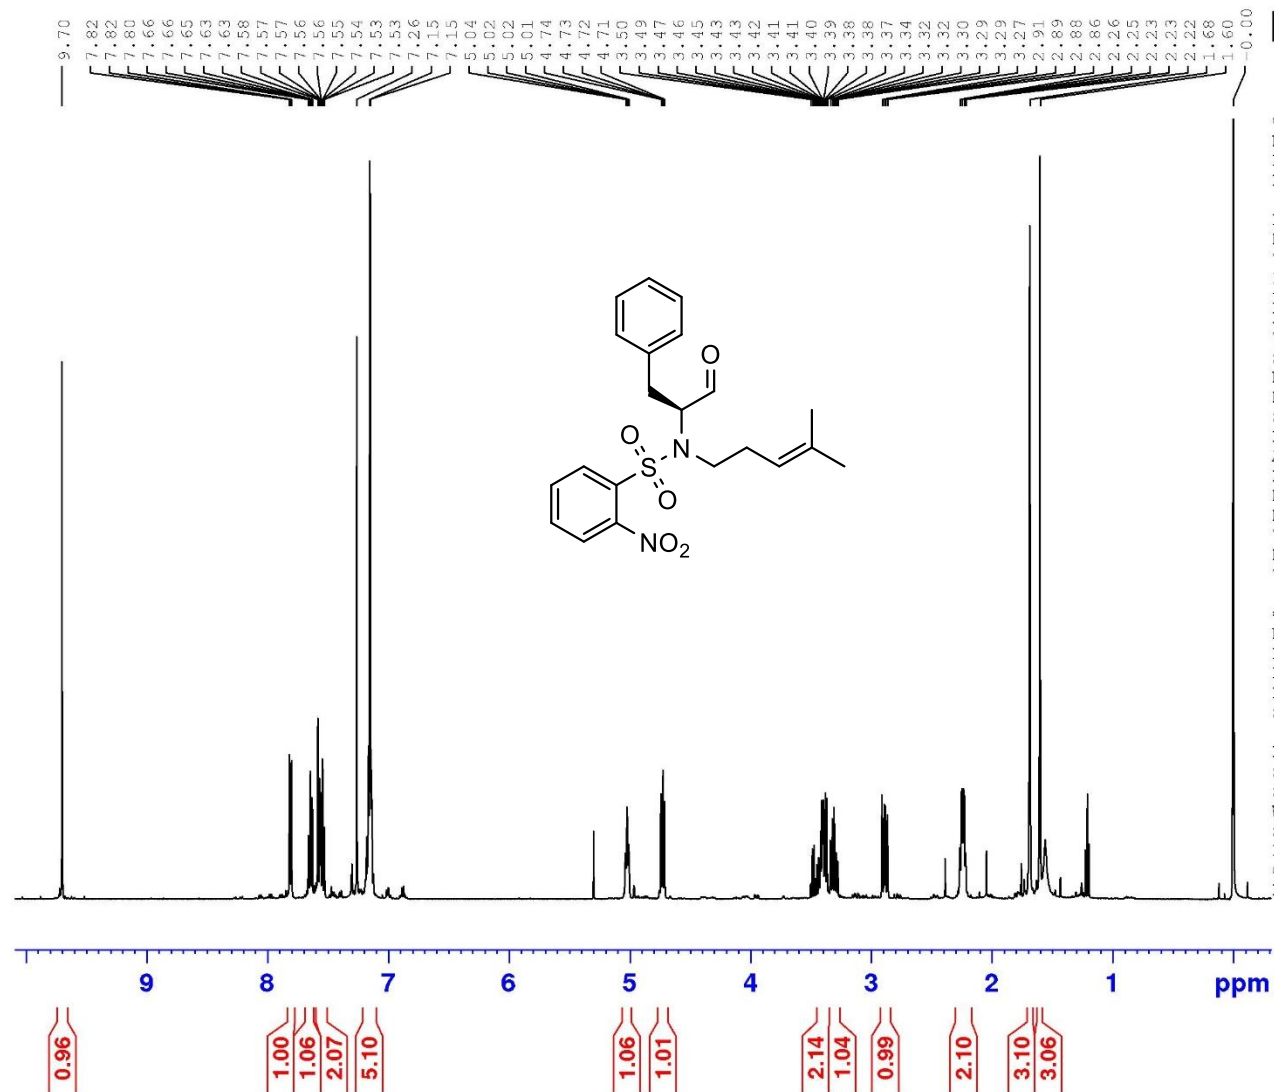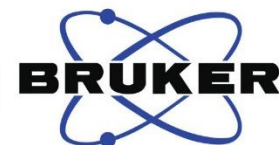

Current Data Parameters  
 NAME May12-2020  
 EXPNO 70  
 PROCNO 1

F2 - Acquisition Parameters  
 Date\_ 20200512  
 Time 13.03  
 INSTRUM spect  
 PROBHD 5 mm PABBO BB-  
 PULPROG zg30  
 TD 32768  
 SOLVENT CDCl3  
 NS 32  
 DS 0  
 SWH 10330.578 Hz  
 FIDRES 0.315264 Hz  
 AQ 1.5859712 sec  
 RG 406  
 DW 48.400 usec  
 DE 10.00 usec  
 TE 296.0 K  
 D1 2.00000000 sec  
 TDO 1

===== CHANNEL f1 =====  
 NUC1 1H  
 P1 11.23 usec  
 PL1 1.00 dB  
 PL1W 19.75309753 W  
 SFO1 500.1560886 MHz

F2 - Processing parameters  
 SI 16384  
 SF 500.1530155 MHz  
 WDW EM  
 SSB 0  
 LB 0.30 Hz  
 GB 0  
 PC 1.00

<sup>1</sup>H-NMR 29f

S214

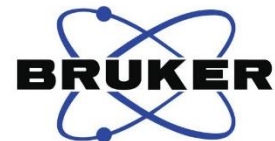

Current Data Parameters  
 NAME May12-2020  
 EXPNO 71  
 PROCNO 1

F2 - Acquisition Parameters  
 Date\_ 20200512  
 Time 13.12  
 INSTRUM spect  
 PROBD 5 mm PABBO BB-  
 PULPROG zgpg30  
 TD 65536  
 SOLVENT CDCl3  
 NS 1024  
 DS 4  
 SWH 32894.738 Hz  
 FIDRES 0.501934 Hz  
 AQ 0.9961472 sec  
 RG 2580  
 DW 15.200 usec  
 DE 10.00 usec  
 TE 296.0 K  
 D1 2.00000000 sec  
 D11 0.03000000 sec  
 TDC 1

===== CHANNEL f1 =====  
 NUC1 13C  
 P1 10.20 usec  
 PL1 1.50 dB  
 PL1W 51.74793243 W  
 SFO1 125.7761482 MHz

===== CHANNEL f2 =====  
 CPDPRG[2] waltz16  
 NUC2 1H  
 PCPD2 100.00 usec  
 PL2 1.00 dB  
 PL12 19.99 dB  
 PL13 21.00 dB  
 PL2W 19.75309753 W  
 PL12W 0.24925002 W  
 PL13W 0.19753097 W  
 SFO2 500.1550006 MHz

F2 - Processing parameters  
 SI 32768  
 SF 125.7635740 MHz  
 WDW EM  
 SSB 0  
 LB 1.00 Hz  
 GB 0  
 PC 1.40

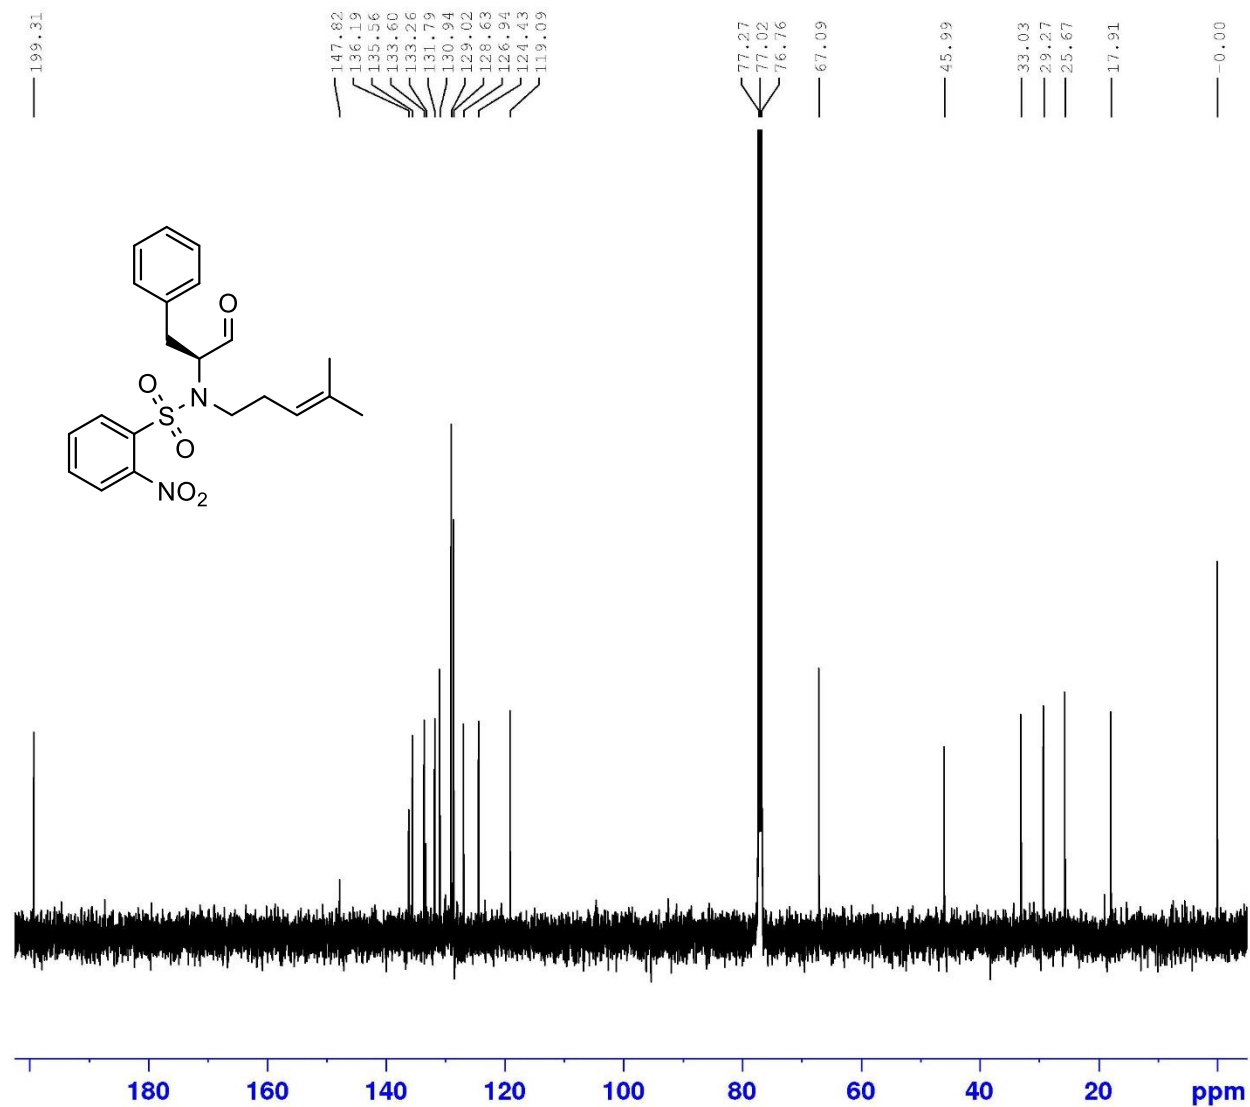

<sup>13</sup>C-NMR 29f

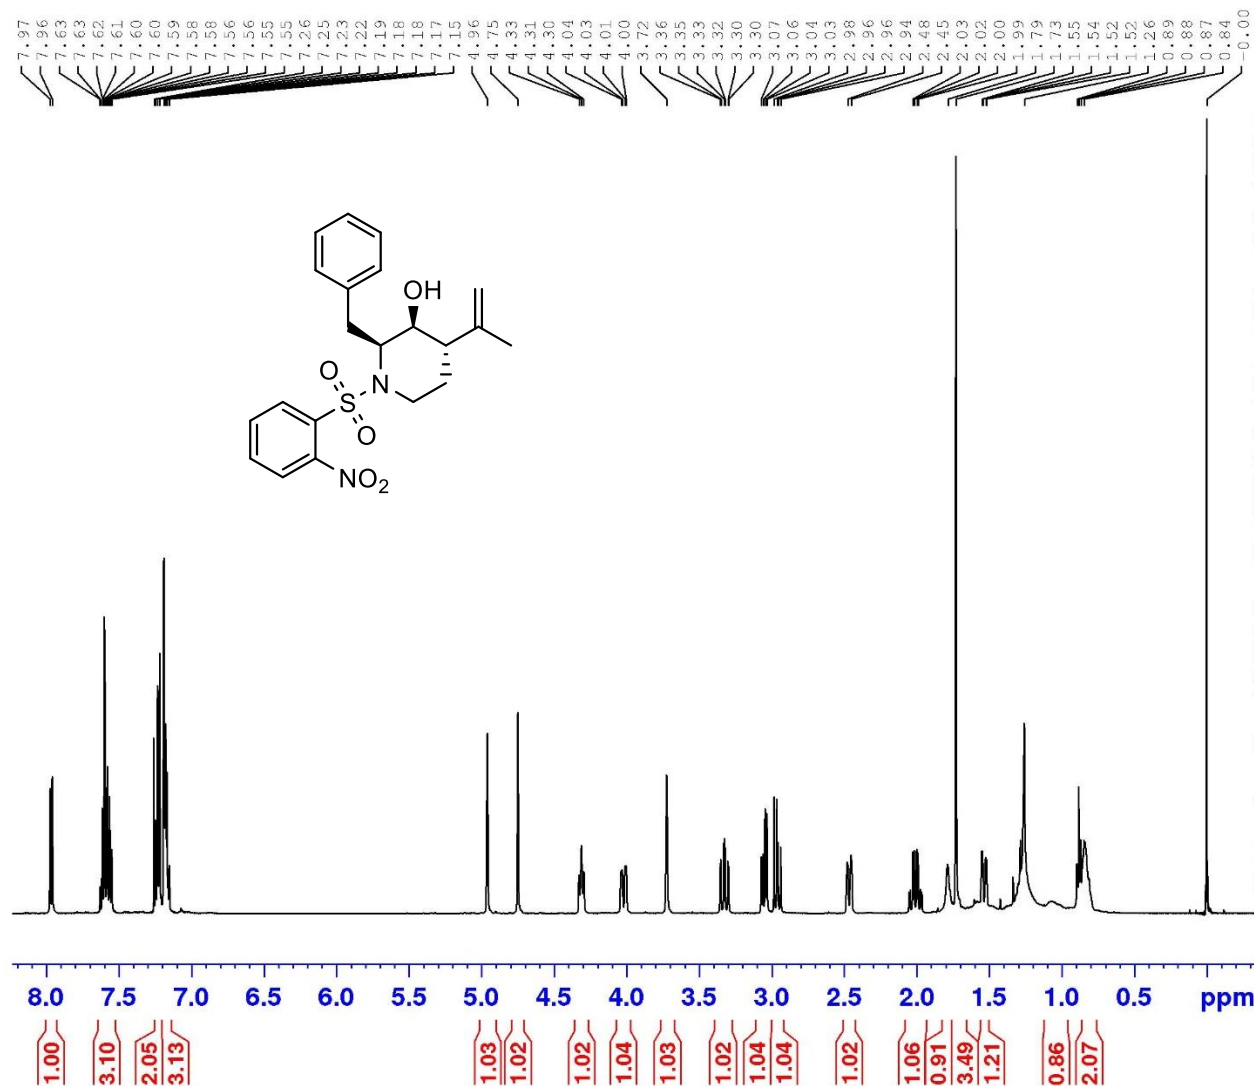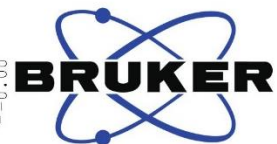

Current Data Parameters  
 NAME Apr15-2020  
 EXPNO 40  
 PROCNO 1

F2 - Acquisition Parameters  
 Date\_ 20200415  
 Time 15.03  
 INSTRUM spect  
 PROBHD 5 mm PABBO BB-  
 PULPROG zg30  
 TD 32768  
 SOLVENT CDCl3  
 NS 32  
 DS 0  
 SWH 10330.578 Hz  
 FIDRES 0.315264 Hz  
 AQ 1.5859712 sec  
 RG 144  
 DW 48.400 usec  
 DE 10.00 usec  
 TE 296.0 K  
 D1 2.00000000 sec  
 TDO 1

===== CHANNEL f1 =====  
 NUC1 1H  
 P1 11.23 usec  
 PL1 1.00 dB  
 PL1W 19.75309753 W  
 SFO1 500.1560886 MHz

F2 - Processing parameters  
 SI 65536  
 SF 500.1530162 MHz  
 WDW no  
 SSB 0  
 LB 0 Hz  
 GB 0  
 PC 1.00

<sup>1</sup>H-NMR (S,S)-30f

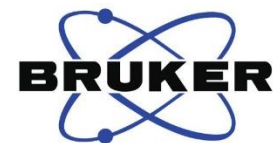

Current Data Parameters  
 NAME Apr15-2020  
 EXPNO 41  
 PROCNO 1

F2 - Acquisition Parameters  
 Date\_ 20200415  
 Time 15.57  
 INSTRUM spect  
 PROBHD 5 mm PABBO BB-  
 PULPROG zgpg30  
 TD 65536  
 SOLVENT CDC13  
 NS 1024  
 DS 4  
 SWH 32894.738 Hz  
 FIDRES 0.501934 Hz  
 AQ 0.9961472 sec  
 RG 2580  
 DW 15.200 usec  
 DE 10.00 usec  
 TE 296.0 K  
 D1 2.00000000 sec  
 D11 0.03000000 sec  
 TDO 1

===== CHANNEL f1 =====  
 NUC1 13C  
 P1 10.20 usec  
 PL1 1.50 dB  
 PL1W 51.74793243 W  
 SFO1 125.7761482 MHz

===== CHANNEL f2 =====  
 CPDPRG[2] waltz16  
 NUC2 1H  
 PCPD2 100.00 usec  
 PL2 1.00 dB  
 PL12 19.99 dB  
 PL13 21.00 dB  
 PL2W 19.75309753 W  
 PL12W 0.24925002 W  
 PL13W 0.19753097 W  
 SFO2 500.1550006 MHz

F2 - Processing parameters  
 SI 32768  
 SF 125.7635756 MHz  
 WDW EM  
 SSB 0  
 LB 1.00 Hz  
 GB 0  
 PC 1.40

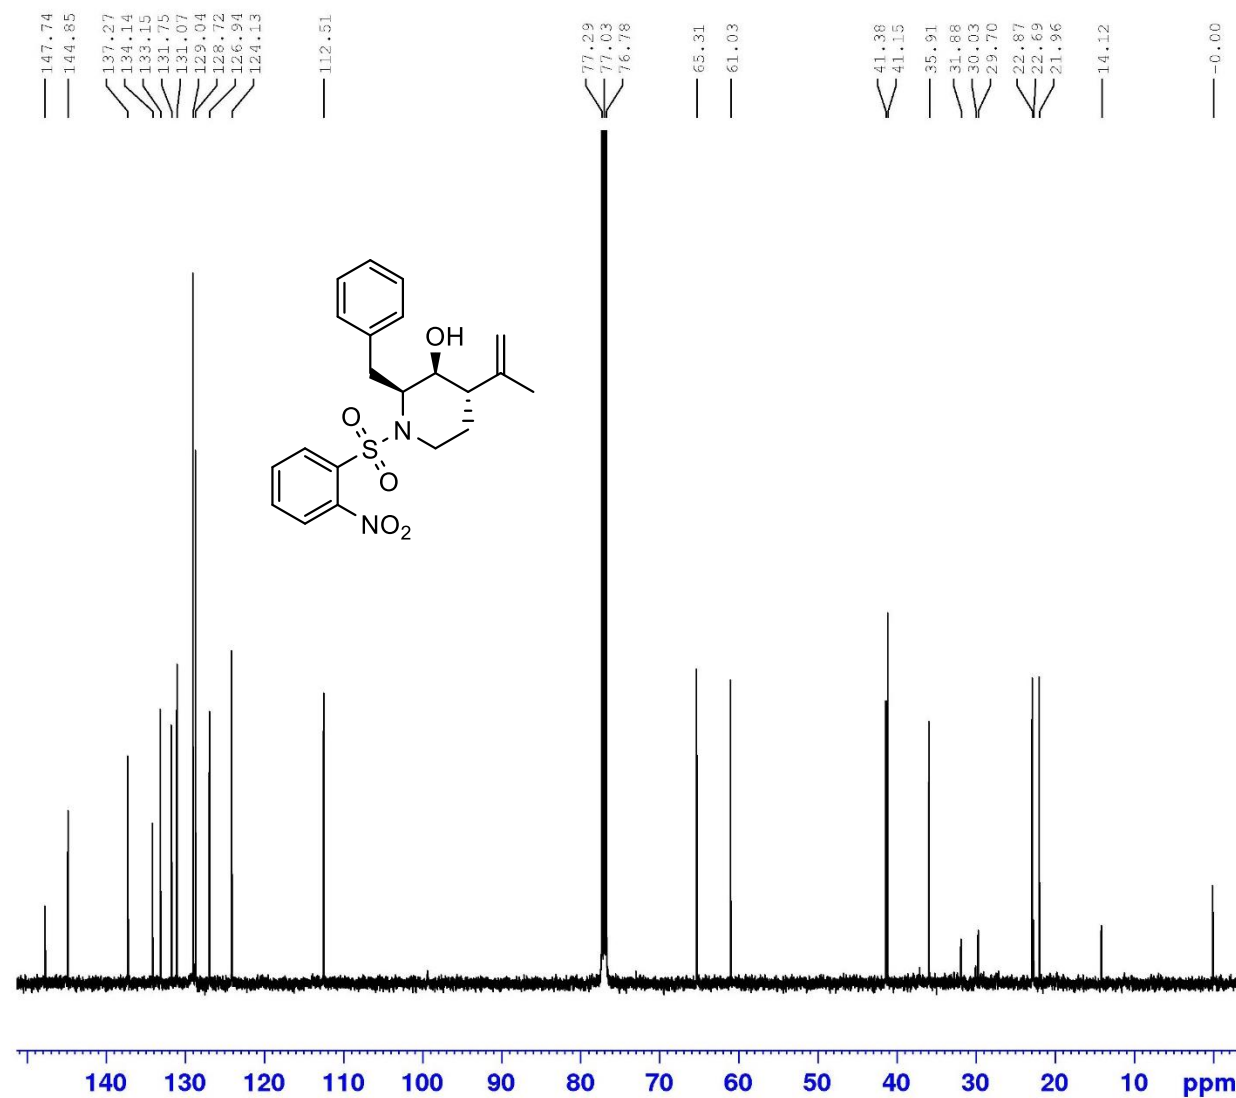

<sup>13</sup>C-NMR (S,S)-30f

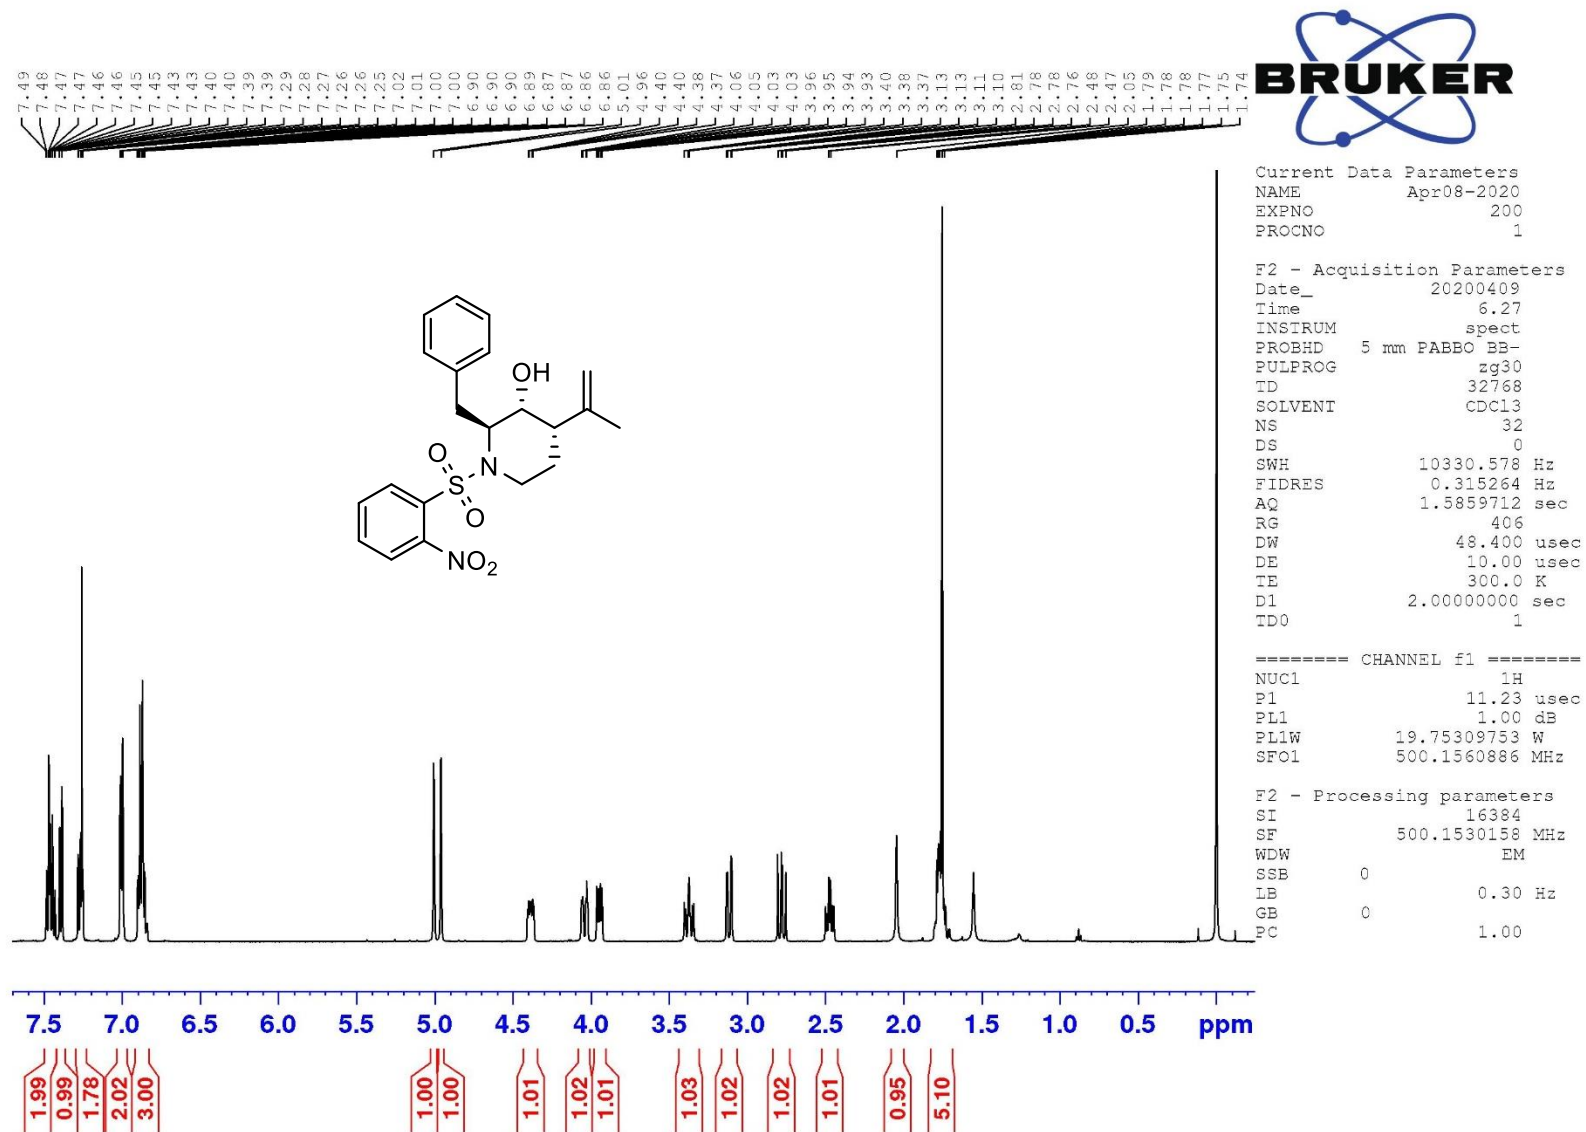

<sup>1</sup>H-NMR (R,S)-30f

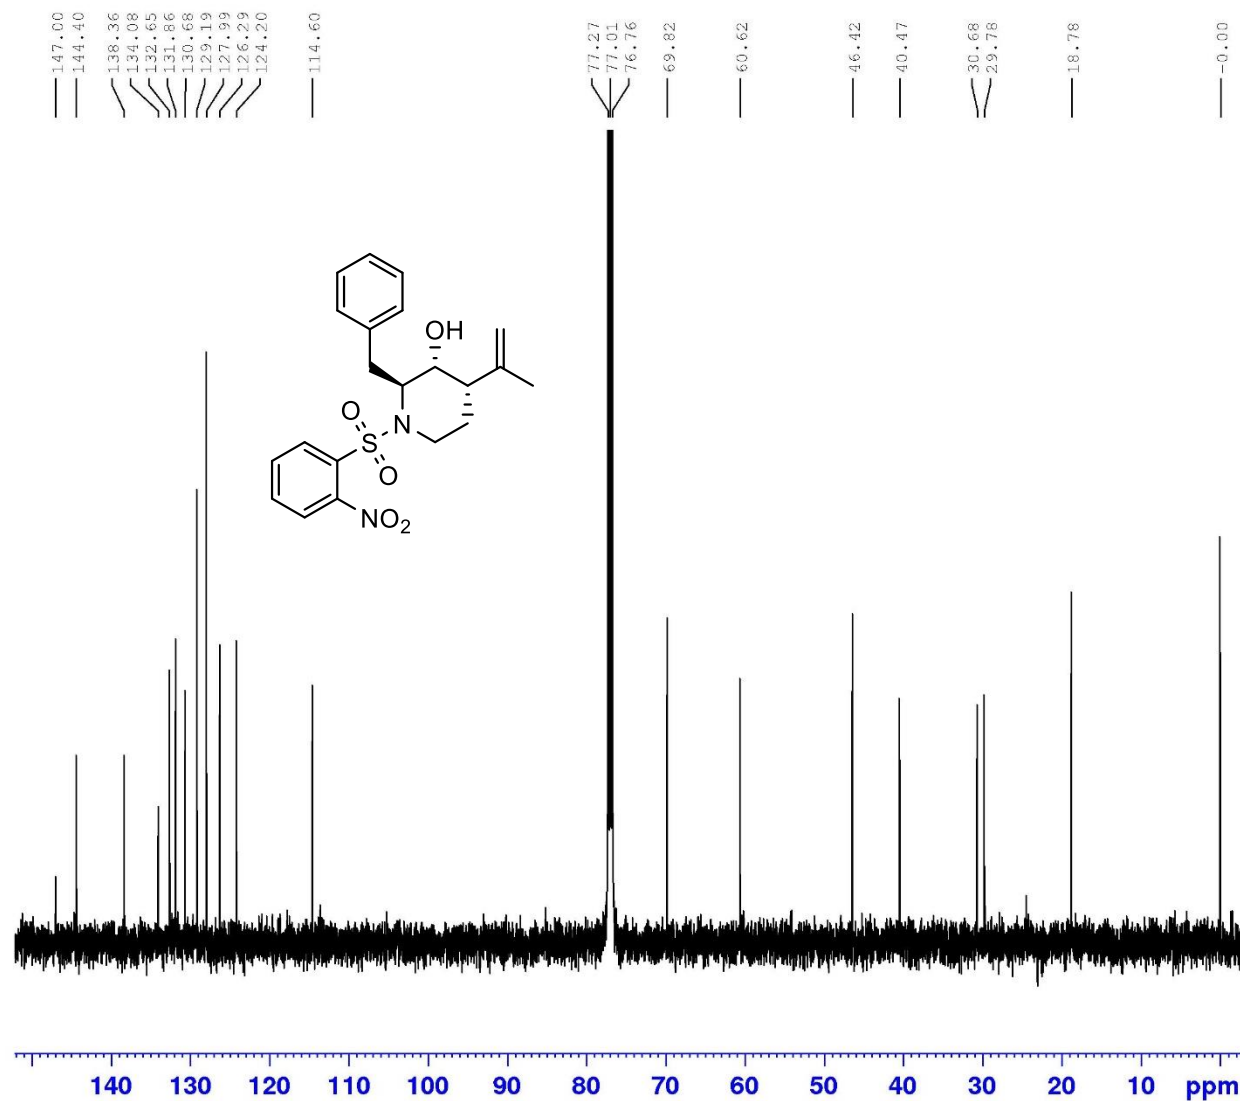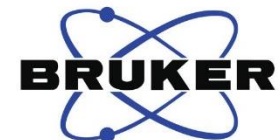

Current Data Parameters  
NAME Apr08-2020  
EXPNO 201  
PROCNO 1

F2 - Acquisition Parameters  
Date\_ 20200409  
Time 7.20  
INSTRUM spect  
PROBHD 5 mm PABBO BB-  
PULPROG zgpg30  
TD 65536  
SOLVENT CDCl3  
NS 1024  
DS 4  
SWH 32894.738 Hz  
FIDRES 0.501934 Hz  
AQ 0.9961472 sec  
RG 2580  
DW 15.200 usec  
DE 10.00 usec  
TE 296.0 K  
D1 2.00000000 sec  
D11 0.03000000 sec  
TD0 1

===== CHANNEL f1 =====  
NUC1 13C  
P1 10.20 usec  
PL1 1.50 dB  
PL1W 51.74793243 W  
SFO1 125.7761482 MHz

===== CHANNEL f2 =====  
CPDPRG[2] waltz16  
NUC2 1H  
PCPD2 100.00 usec  
PL2 1.00 dB  
PL12 19.99 dB  
PL13 21.00 dB  
PL2W 19.75309753 W  
PL12W 0.24925002 W  
PL13W 0.19753097 W  
SFO2 500.1550006 MHz

F2 - Processing parameters  
SI 32768  
SF 125.7635746 MHz  
WDW EM  
SSB 0  
LB 1.00 Hz  
GB 0  
PC 1.40

<sup>13</sup>C-NMR (R,S)-30f

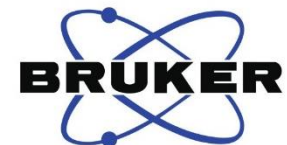

Current Data Parameters  
 NAME Jun25-2020  
 EXPNO 70  
 PROCNO 1

F2 - Acquisition Parameters  
 Date\_ 20200626  
 Time 2.45  
 INSTRUM spect  
 PROBHD 5 mm CPQCI 1H-  
 PULPROG zg  
 TD 65536  
 SOLVENT CDCl3  
 NS 16  
 DS 2  
 SWH 10504.202 Hz  
 FIDRES 0.160281 Hz  
 AQ 3.1195135 sec  
 RG 21.86  
 DW 47.600 usec  
 DE 20.00 usec  
 TE 298.0 K  
 D1 2.00000000 sec  
 TD0 1

===== CHANNEL f1 =====  
 SFO1 700.3632917 MHz  
 NUC1 1H  
 P1 8.15 usec  
 PLW1 9.89999962 W

F2 - Processing parameters  
 SI 65536  
 SF 700.3600184 MHz  
 WDW EM  
 SSB 0  
 LB 0.30 Hz  
 GB 0  
 PC 1.00

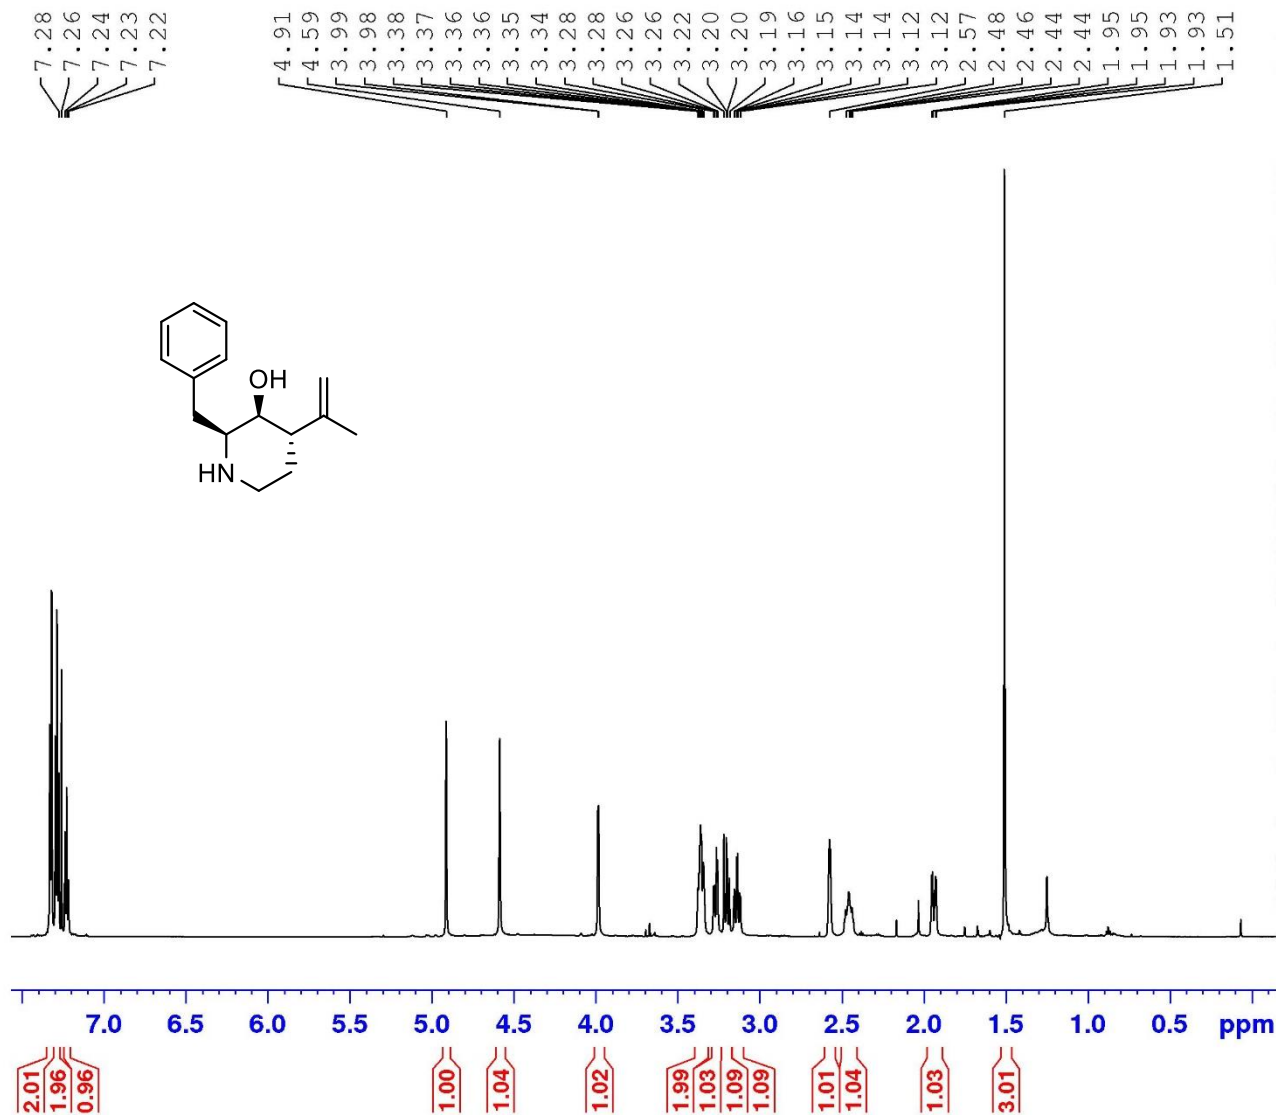

<sup>1</sup>H-NMR (S,S)-32f

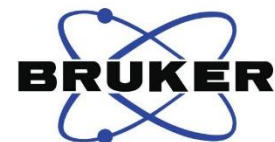

Current Data Parameters  
 NAME Jun25-2020  
 EXPNO 71  
 PROCNO 1

F2 - Acquisition Parameters  
 Date\_ 20200626  
 Time 3.10  
 INSTRUM spect  
 PROBHD 5 mm CPQCI 1H-  
 PULPROG zgpg30  
 TD 65356  
 SOLVENT CDCl3  
 NS 512  
 DS 4  
 SWH 40760.871 Hz  
 FIDRES 0.623675 Hz  
 AQ 0.8017003 sec  
 RG 182.53  
 DW 12.267 usec  
 DE 18.00 usec  
 TE 298.0 K  
 D1 2.00000000 sec  
 D11 0.03000000 sec  
 TD0 1

===== CHANNEL f1 =====  
 SFO1 176.1232717 MHz  
 NUC1 13C  
 P1 12.00 usec  
 PLW1 105.00000000 W

===== CHANNEL f2 =====  
 SFO2 700.3628014 MHz  
 NUC2 1H  
 CPDPRG[2] waltz16  
 PCPD2 65.00 usec  
 PLW2 9.89999962 W  
 PLW12 0.15564001 W  
 PLW13 0.07837200 W

F2 - Processing parameters  
 SI 131072  
 SF 176.1036620 MHz  
 WDW EM  
 SSB 0  
 LB 1.00 Hz  
 GB 0  
 PC 1.40

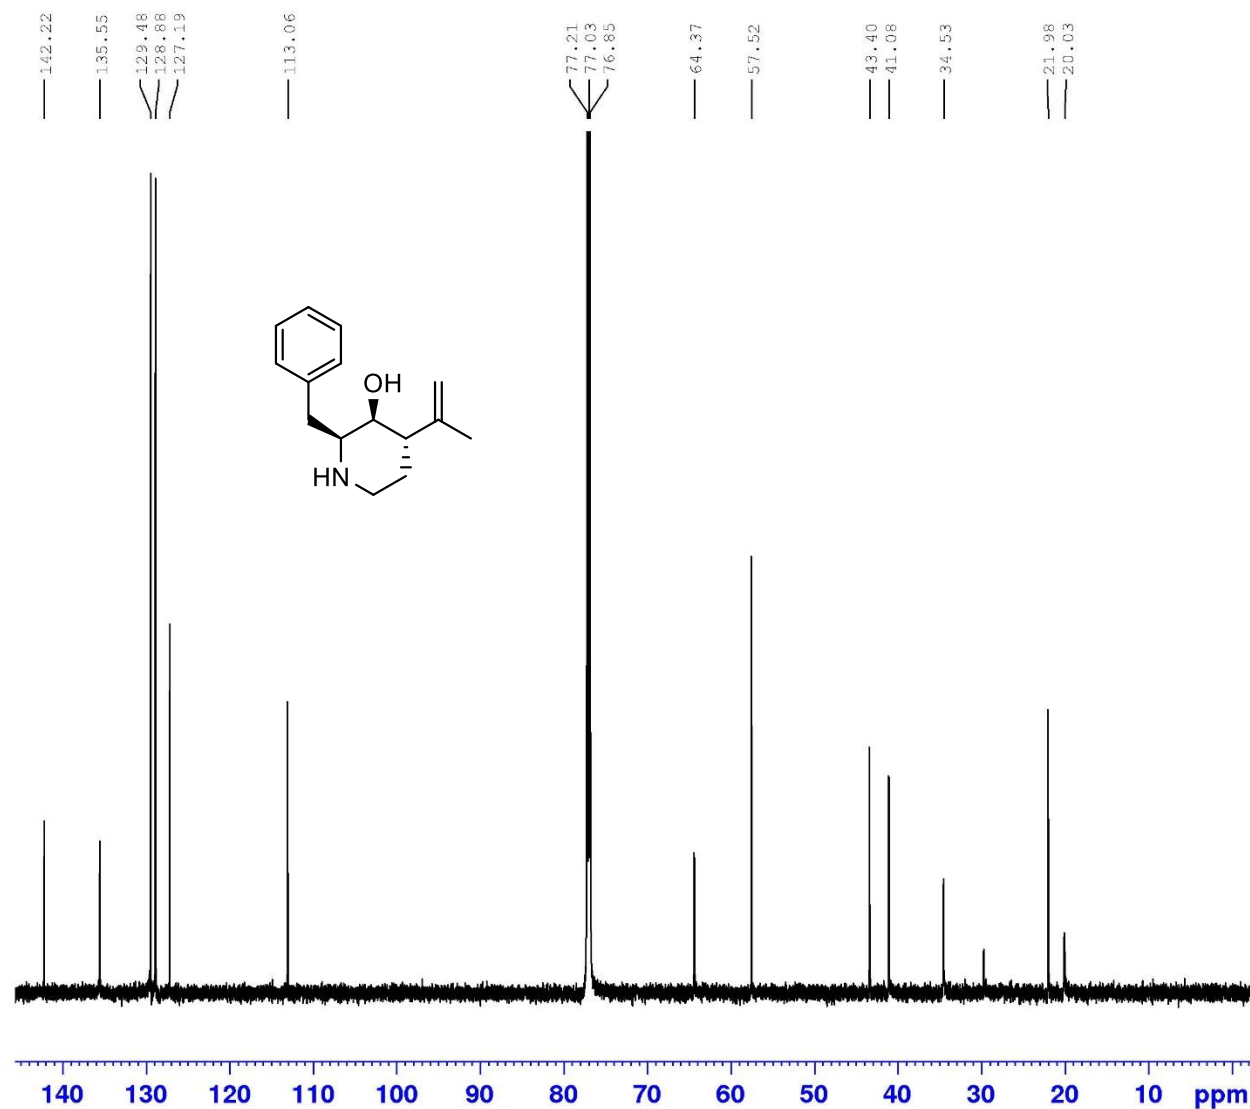

<sup>13</sup>C-NMR (S,S)-32f

7.30  
7.29  
7.26  
7.24  
7.23

4.95  
4.77  
4.01  
3.99  
3.99  
3.80  
3.47  
3.45  
3.44  
3.42  
3.41  
3.17  
3.15  
3.14  
3.12  
3.11  
2.95  
2.93  
2.90  
2.50  
2.48  
2.33  
2.32  
2.31  
2.30  
2.28  
2.27  
2.25  
2.24  
1.71  
1.69  
1.66

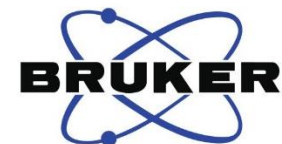

Current Data Parameters  
NAME Jun18-2021  
EXPNO 60  
PROCNO 1

F2 - Acquisition Parameters  
Date\_ 20210618  
Time 8.59  
INSTRUM spect  
PROBHD 5 mm PABBO BB-  
PULPROG zg30  
TD 32768  
SOLVENT CDCl3  
NS 32  
DS 0  
SWH 10330.578 Hz  
FIDRES 0.315264 Hz  
AQ 1.5859712 sec  
RG 322  
DW 48.400 usec  
DE 10.00 usec  
TE 296.0 K  
D1 2.00000000 sec  
TD0 1

===== CHANNEL f1 =====  
NUC1 1H  
P1 11.23 usec  
PL1 1.00 dB  
PL1W 19.75309753 W  
SFO1 500.1560886 MHz

F2 - Processing parameters  
SI 16384  
SF 500.1530159 MHz  
WDW EM  
SSB 0  
LB 0.30 Hz  
GB 0  
PC 1.00

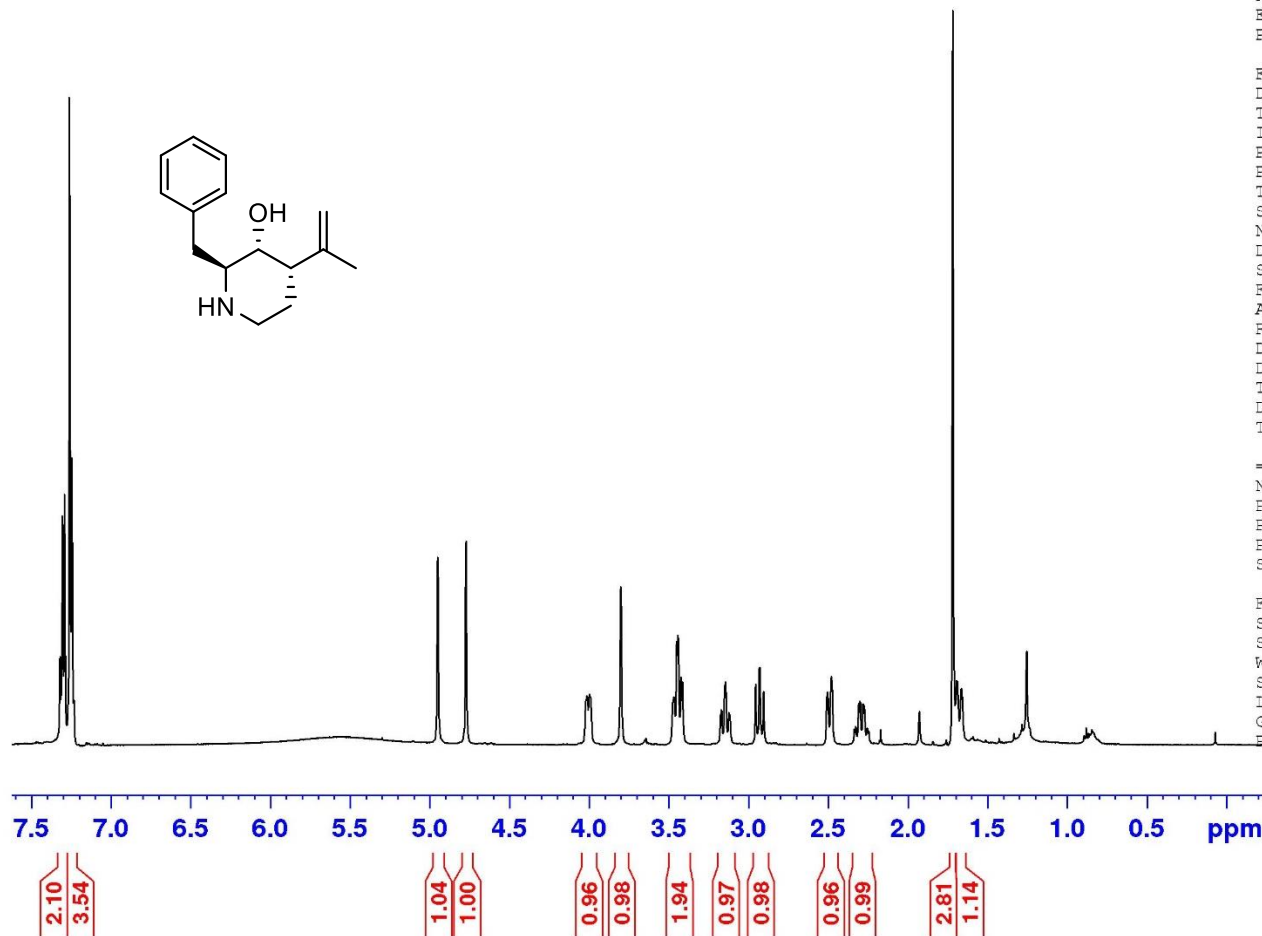

<sup>1</sup>H-NMR (R,S)-32f

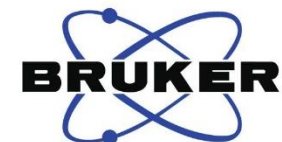

Current Data Parameters  
 NAME Jun18-2021  
 EXPNO 61  
 PROCNO 1

F2 - Acquisition Parameters  
 Date\_ 20210618  
 Time 9.54  
 INSTRUM spect  
 PROBHD 5 mm PABBO BB-  
 PULPROG zgpg30  
 TD 65536  
 SOLVENT CDC13  
 NS 1024  
 DS 4  
 SWH 32894.738 Hz  
 FIDRES 0.501934 Hz  
 AQ 0.9961472 sec  
 RG 2580  
 DW 15.200 usec  
 DE 10.00 usec  
 TE 296.0 K  
 D1 2.00000000 sec  
 D11 0.03000000 sec  
 TD0 1

===== CHANNEL f1 =====  
 NUC1 13C  
 P1 10.20 usec  
 PL1 1.50 dB  
 PL1W 51.74793243 W  
 SFO1 125.7761482 MHz

===== CHANNEL f2 =====  
 CPDPRG[2] waltz16  
 NUC2 1H  
 PCPD2 100.00 usec  
 PL2 1.00 dB  
 PL12 19.99 dB  
 PL13 21.00 dB  
 PL2W 19.75309753 W  
 PL12W 0.24925002 W  
 PL13W 0.19753097 W  
 SFO2 500.1550006 MHz

F2 - Processing parameters  
 SI 32768  
 SF 125.7635720 MHz  
 WDW EM  
 SSB 0  
 LB 1.00 Hz  
 GB 0  
 PC 1.40

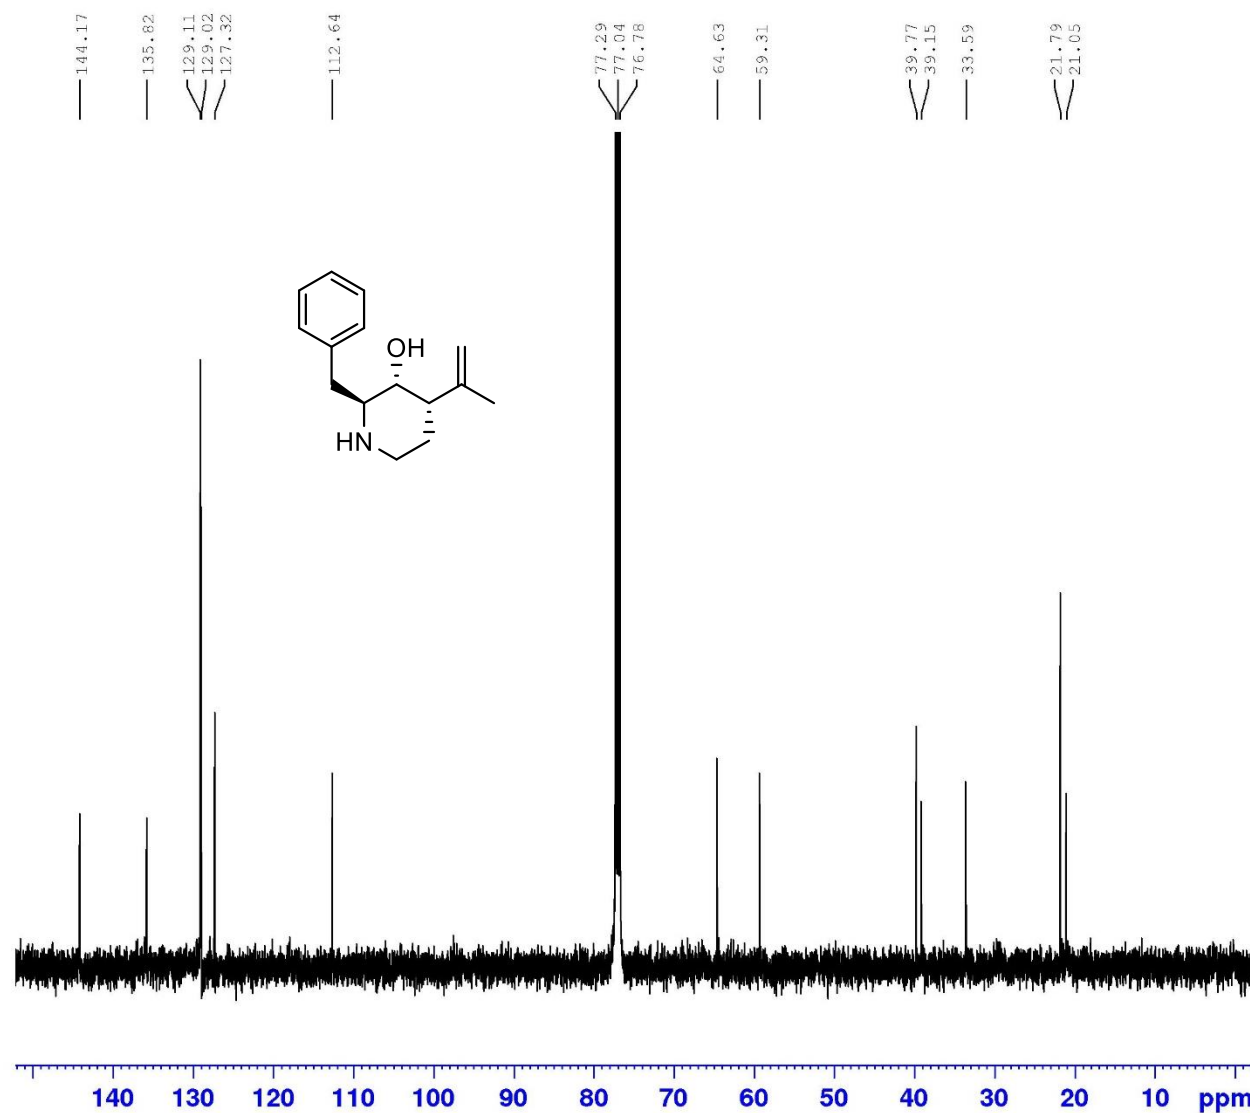

<sup>13</sup>C-NMR (R,S)-32f

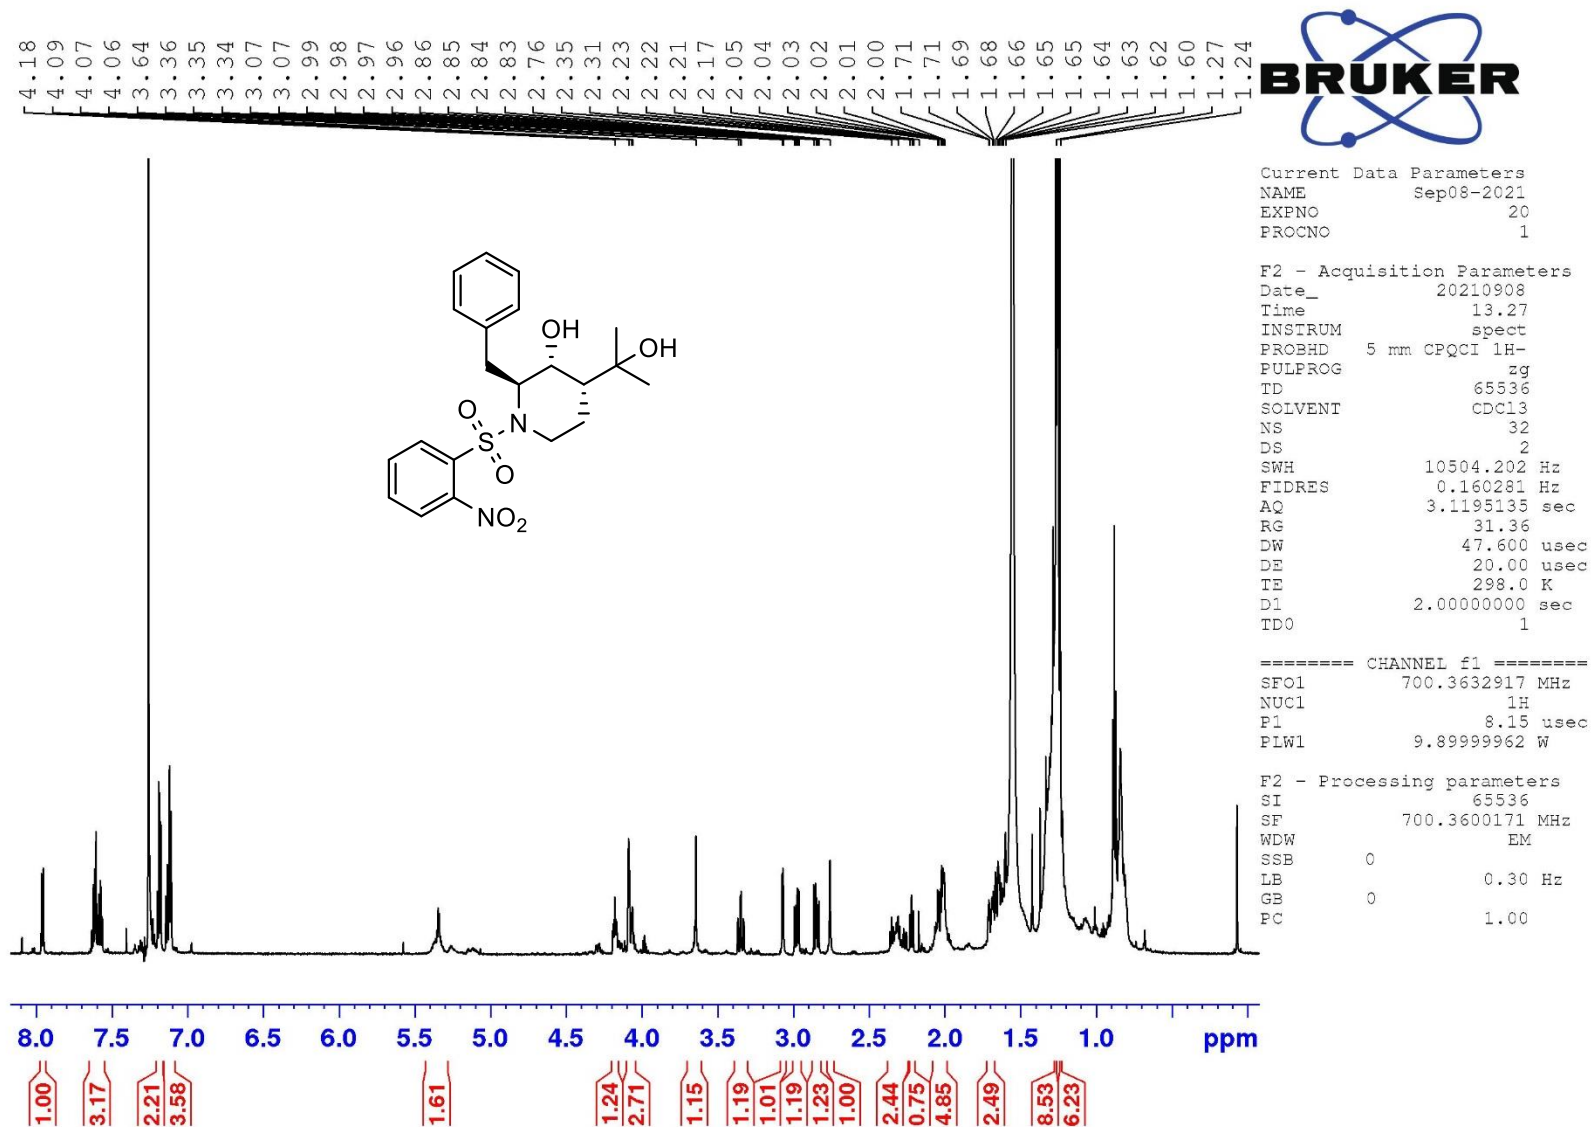

**<sup>1</sup>H-NMR (R,R)-31f**

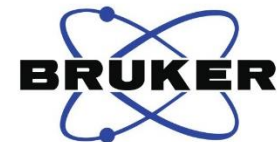

Current Data Parameters  
 NAME Sep08-2021  
 EXPNO 22  
 PROCNO 1

F2 - Acquisition Parameters  
 Date\_ 20210909  
 Time 3.26  
 INSTRUM spect  
 PROBHD 5 mm CPQCI 1H-  
 PULPROG zgpg30  
 TD 65356  
 SOLVENT CDCl3  
 NS 6144  
 DS 4  
 SWH 40760.871 Hz  
 FIDRES 0.623675 Hz  
 AQ 0.8017003 sec  
 RG 182.53  
 DW 12.267 usec  
 DE 18.00 usec  
 TE 298.0 K  
 D1 2.00000000 sec  
 D11 0.03000000 sec  
 TD0 1

===== CHANNEL f1 =====  
 SFO1 176.1232717 MHz  
 NUC1 13C  
 P1 12.00 usec  
 PLW1 105.00000000 W

===== CHANNEL f2 =====  
 SFO2 700.3628014 MHz  
 NUC2 1H  
 CPDPRG[2] waltz16  
 PCPD2 65.00 usec  
 PLW2 9.89999962 W  
 PLW12 0.15564001 W  
 PLW13 0.07837200 W

F2 - Processing parameters  
 SI 131072  
 SF 176.1056620 MHz  
 WDW EM  
 SSB 0  
 LB 1.00 Hz  
 GB 0  
 PC 1.40

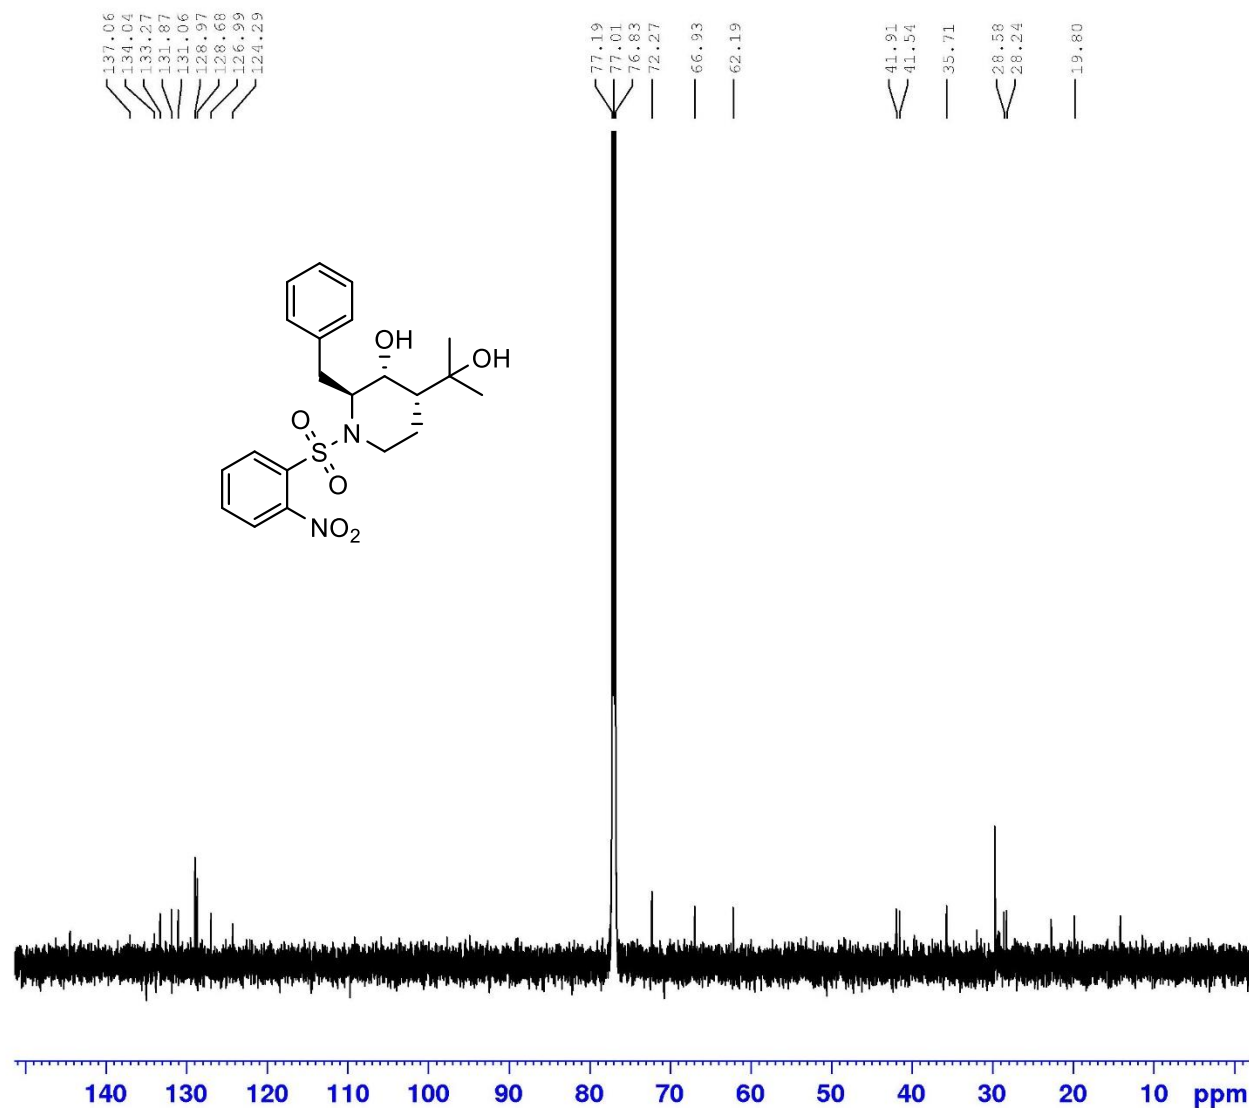

<sup>13</sup>C-NMR (R,R)-31f

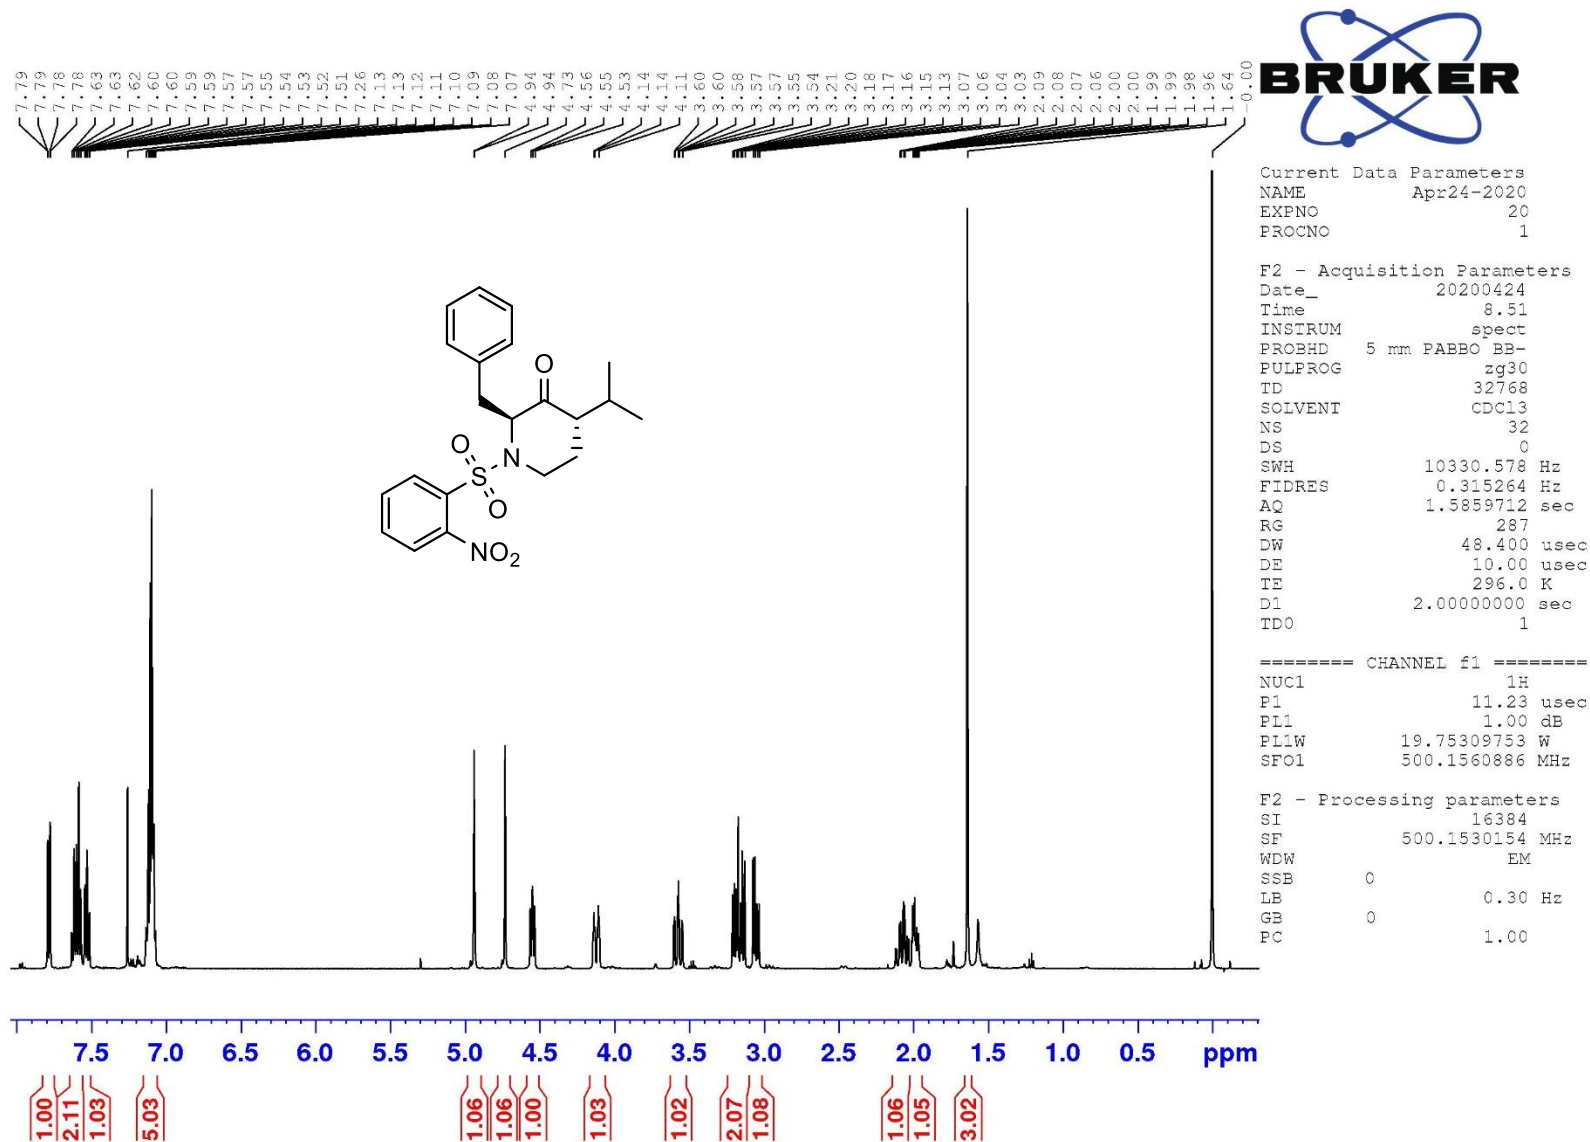

<sup>1</sup>H-NMR (S)-S2f

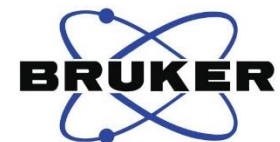

Current Data Parameters  
 NAME Apr24-2020  
 EXPNO 21  
 PROCNO 1

F2 - Acquisition Parameters  
 Date\_ 20200424  
 Time 9.46  
 INSTRUM spect  
 PROBHD 5 mm PABBO BB-  
 PULPROG zgpg30  
 TD 65536  
 SOLVENT CDCl3  
 NS 1024  
 DS 4  
 SWH 32894.738 Hz  
 FIDRES 0.501934 Hz  
 AQ 0.9961472 sec  
 RG 2300  
 DW 15.200 usec  
 DE 10.00 usec  
 TE 296.0 K  
 D1 2.00000000 sec  
 D11 0.03000000 sec  
 TD0 1

===== CHANNEL f1 =====  
 NUC1 13C  
 P1 10.20 usec  
 PL1 1.50 dB  
 PL1W 51.74793243 W  
 SFO1 125.7761482 MHz

===== CHANNEL f2 =====  
 CPDPRG[2] waltz16  
 NUC2 1H  
 PCPD2 100.00 usec  
 PL2 1.00 dB  
 PL12 19.99 dB  
 PL13 21.00 dB  
 PL2W 19.75309753 W  
 PL12W 0.24925002 W  
 PL13W 0.19753097 W  
 SFO2 500.1550006 MHz

F2 - Processing parameters  
 SI 32768  
 SF 125.7635748 MHz  
 WDW EM  
 SSB 0  
 LB 1.00 Hz  
 GB 0  
 PC 1.40

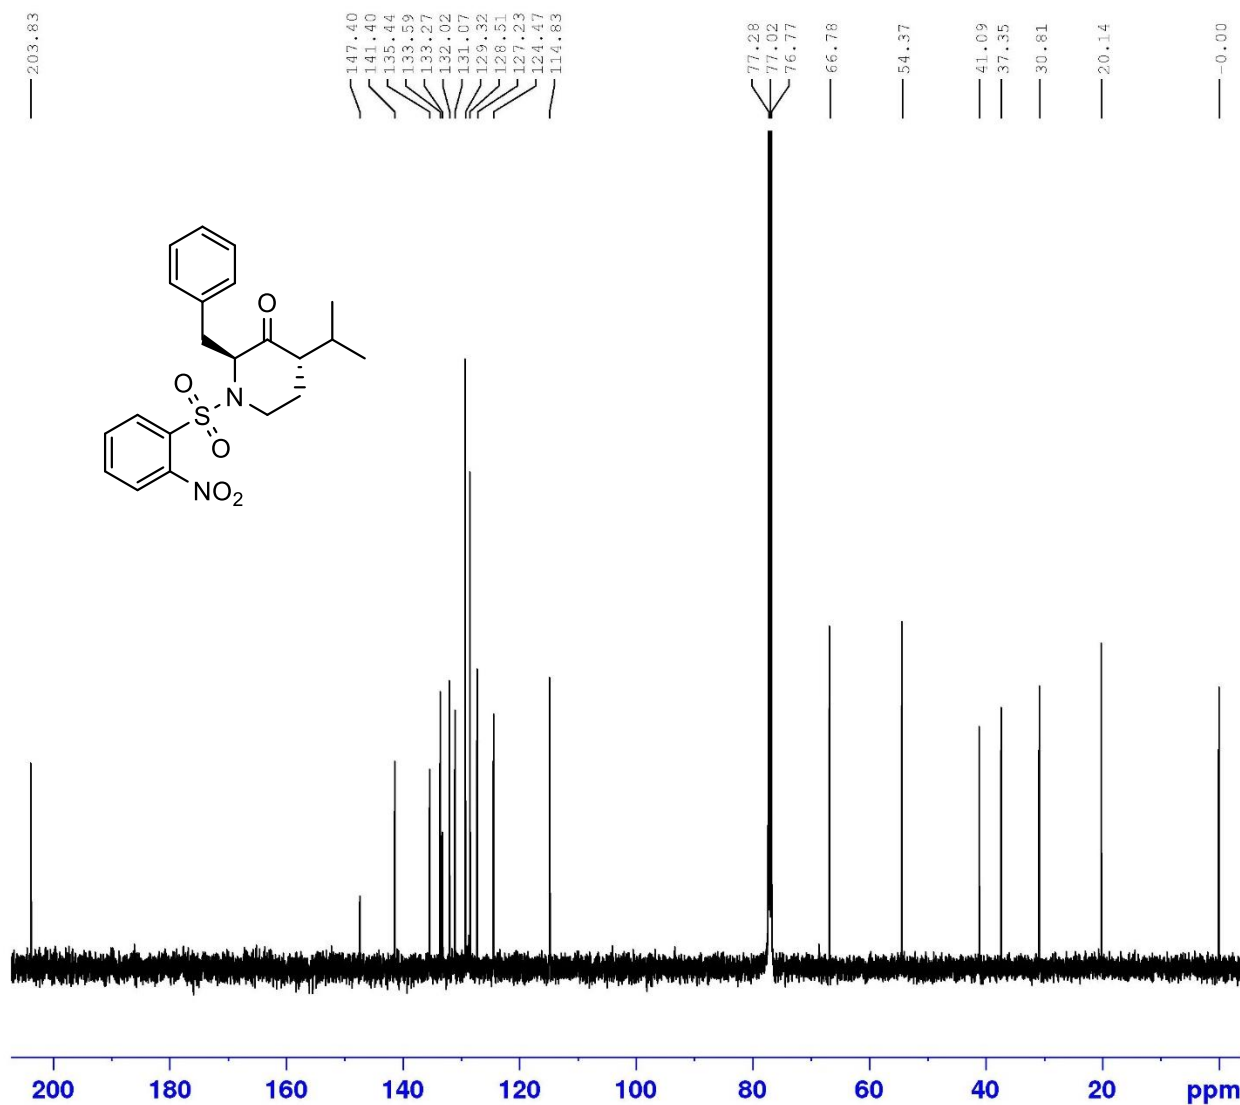

<sup>13</sup>C-NMR (S)-S2f

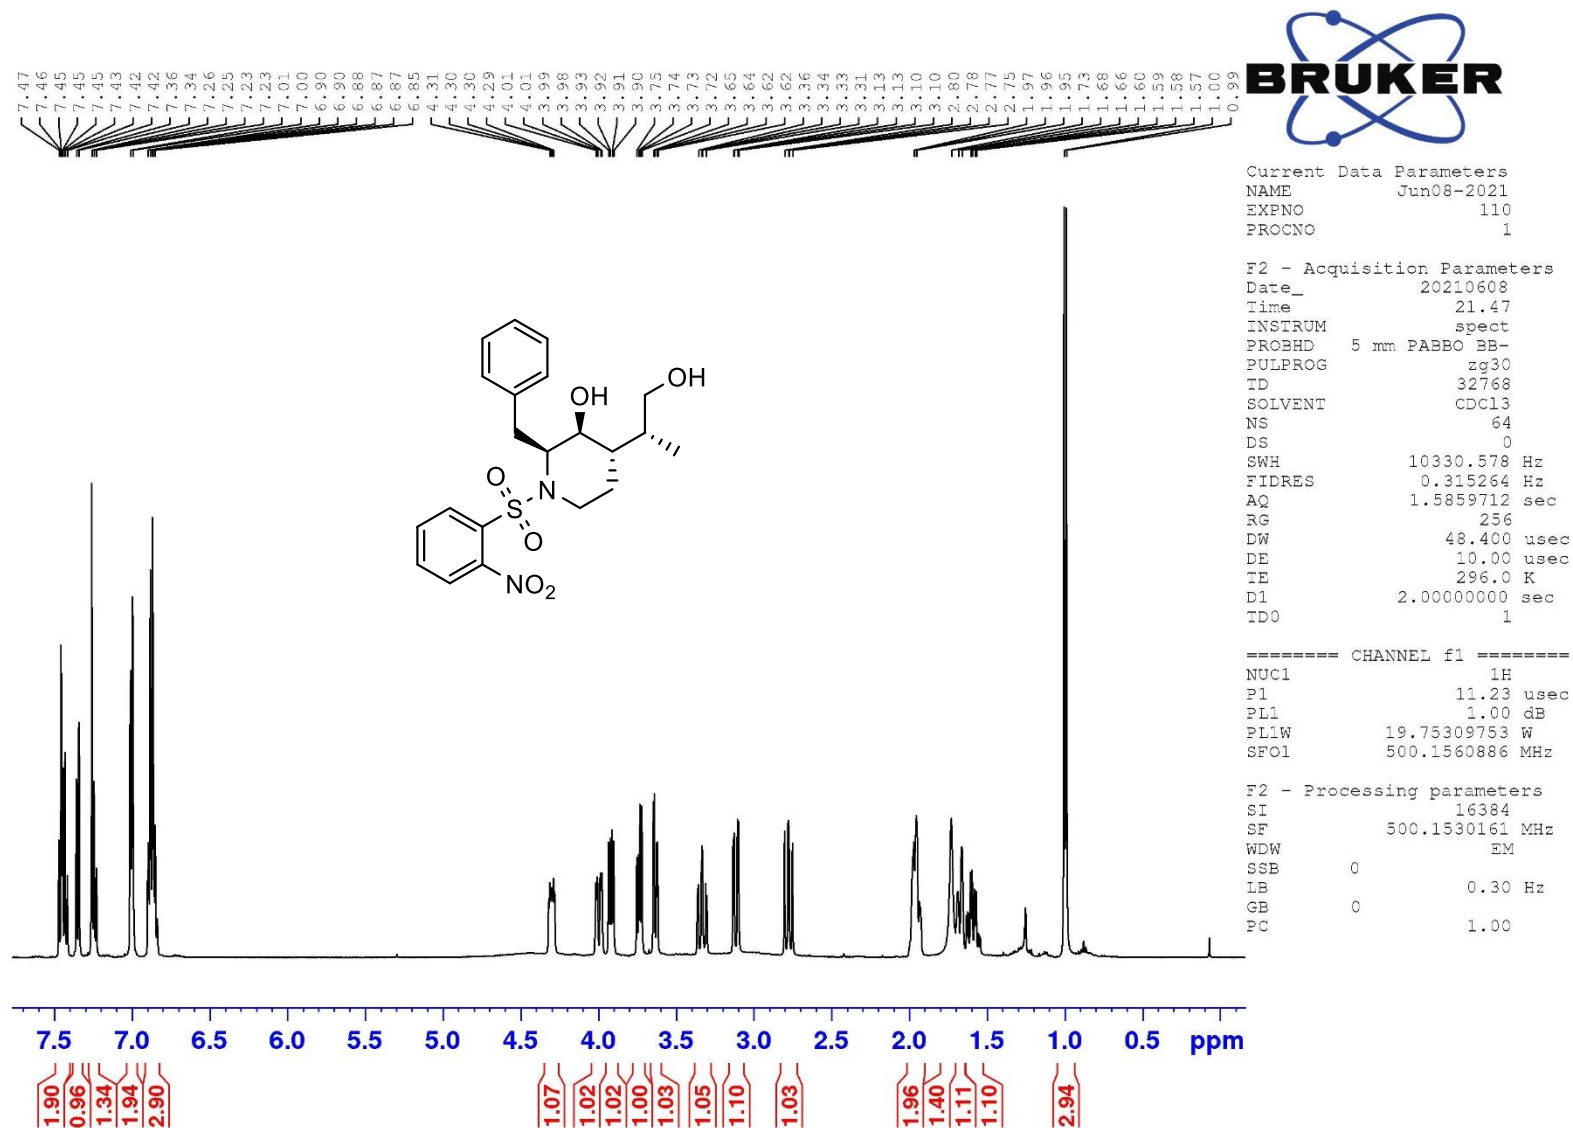

<sup>1</sup>H-NMR (S,S,R)-34f

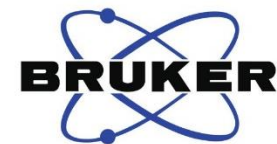

Current Data Parameters  
 NAME Jun04-2021  
 EXPNO 21  
 PROCNO 1

F2 - Acquisition Parameters  
 Date\_ 20210604  
 Time 10.28  
 INSTRUM spect  
 PROBHD 5 mm CPQCI 1H-  
 PULPROG zgpg30  
 TD 65356  
 SOLVENT CDCl3  
 NS 512  
 DS 4  
 SWH 40760.871 Hz  
 FIDRES 0.623675 Hz  
 AQ 0.8017003 sec  
 RG 182.53  
 DW 12.267 usec  
 DE 18.00 usec  
 TE 298.0 K  
 D1 2.00000000 sec  
 D11 0.03000000 sec  
 TD0 1

===== CHANNEL f1 =====  
 SFO1 176.1232717 MHz  
 NUC1 13C  
 P1 12.00 usec  
 PLW1 105.00000000 W

===== CHANNEL f2 =====  
 SFO2 700.3628014 MHz  
 NUC2 1H  
 CPDPRG[2] waltz16  
 PCPD2 65.00 usec  
 PLW2 9.89999962 W  
 PLW12 0.15564001 W  
 PLW13 0.07837200 W

F2 - Processing parameters  
 SI 131072  
 SF 176.1056620 MHz  
 WDW EM  
 SSB 0  
 LB 1.00 Hz  
 GB 0  
 PC 1.40

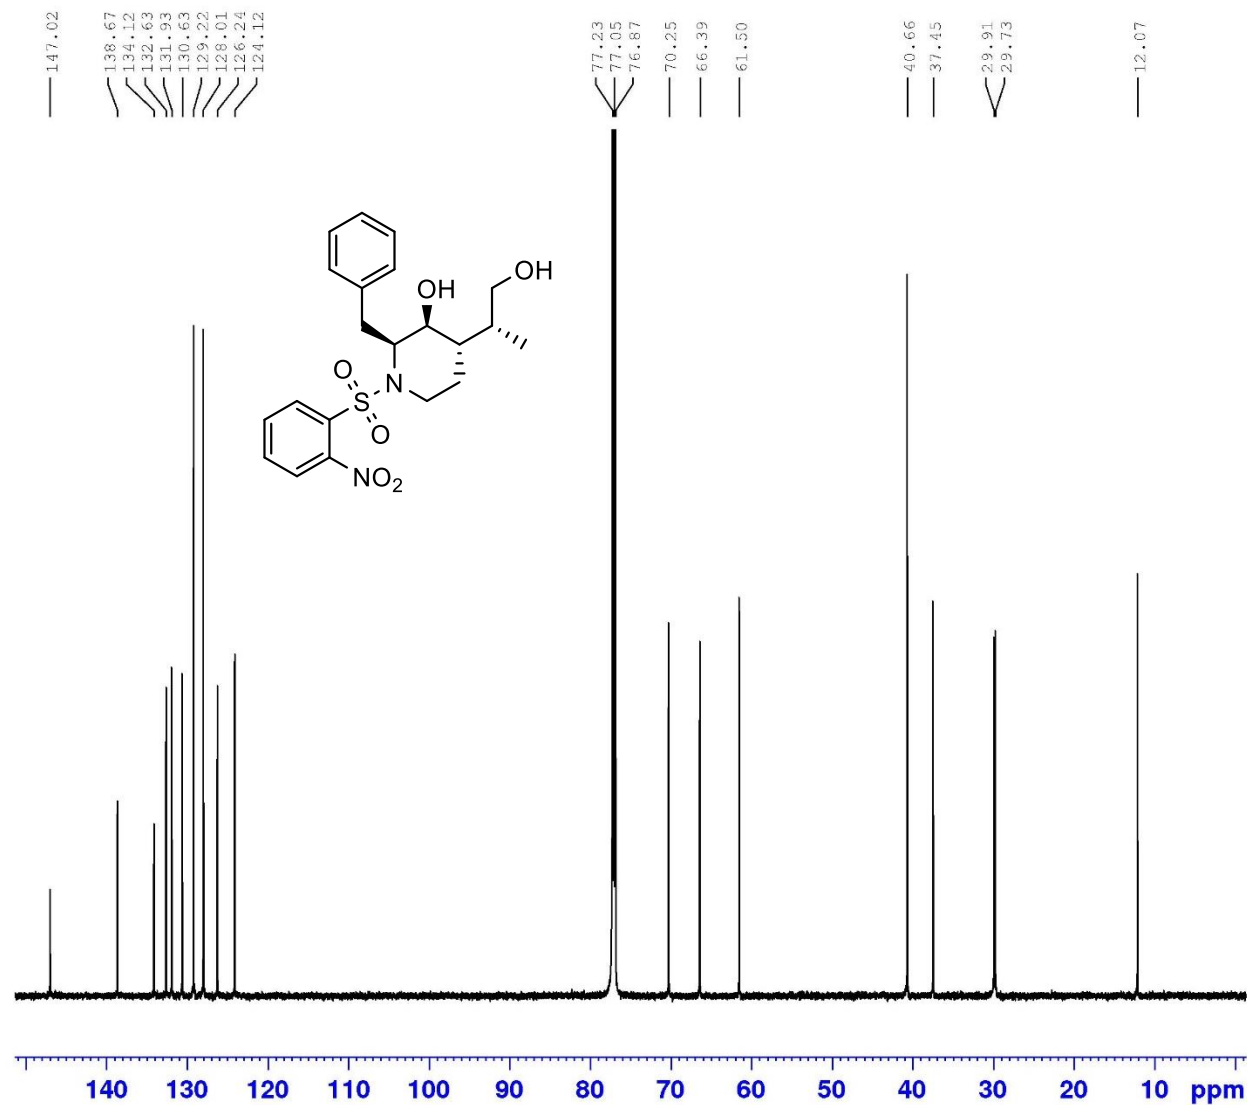

<sup>13</sup>C-NMR (S,S,R)-34f

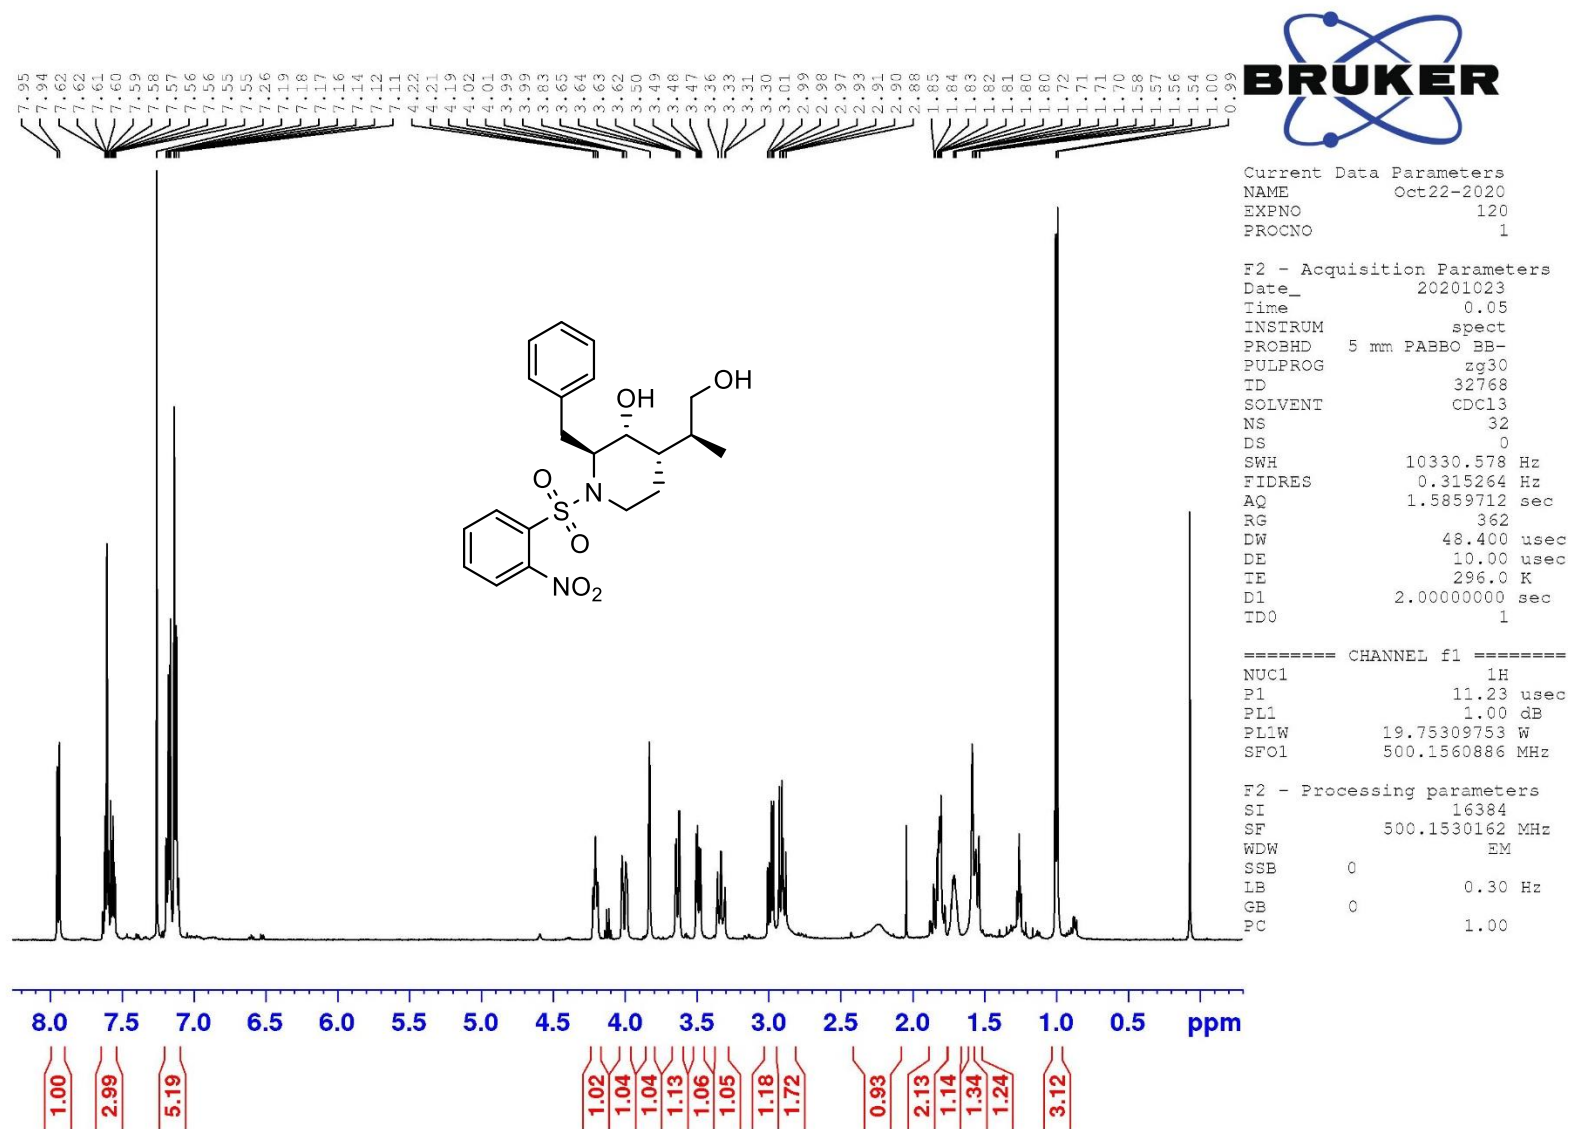

<sup>1</sup>H-NMR (R,S,S)-34f

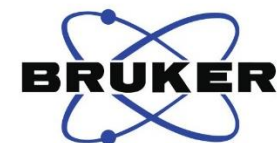

Current Data Parameters  
 NAME Oct22-2020  
 EXPNO 121  
 PROCNO 1

F2 - Acquisition Parameters  
 Date\_ 20201023  
 Time 0.59  
 INSTRUM spect  
 PROBHD 5 mm PABBO BB-  
 PULPROG zgpg30  
 TD 65536  
 SOLVENT CDCl3  
 NS 1024  
 DS 4  
 SWH 32894.738 Hz  
 FIDRES 0.501934 Hz  
 AQ 0.9961472 sec  
 RG 2580  
 DW 15.200 usec  
 DE 10.00 usec  
 TE 296.0 K  
 D1 2.00000000 sec  
 D11 0.03000000 sec  
 TDO 1

===== CHANNEL f1 =====  
 NUC1 13C  
 P1 10.20 usec  
 PL1 1.50 dB  
 PL1W 51.74793243 W  
 SF01 125.7761482 MHz

===== CHANNEL f2 =====  
 CPDPRG[2] waltz16  
 NUC2 1H  
 PCPD2 100.00 usec  
 PL2 1.00 dB  
 PL12 19.99 dB  
 PL13 21.00 dB  
 PL2W 19.75309753 W  
 PL12W 0.24925002 W  
 PL13W 0.19753097 W  
 SF02 500.1550006 MHz

F2 - Processing parameters  
 SI 32768  
 SF 125.7635720 MHz  
 WDW EM  
 SSB 0  
 LB 1.00 Hz  
 GB 0  
 PC 1.40

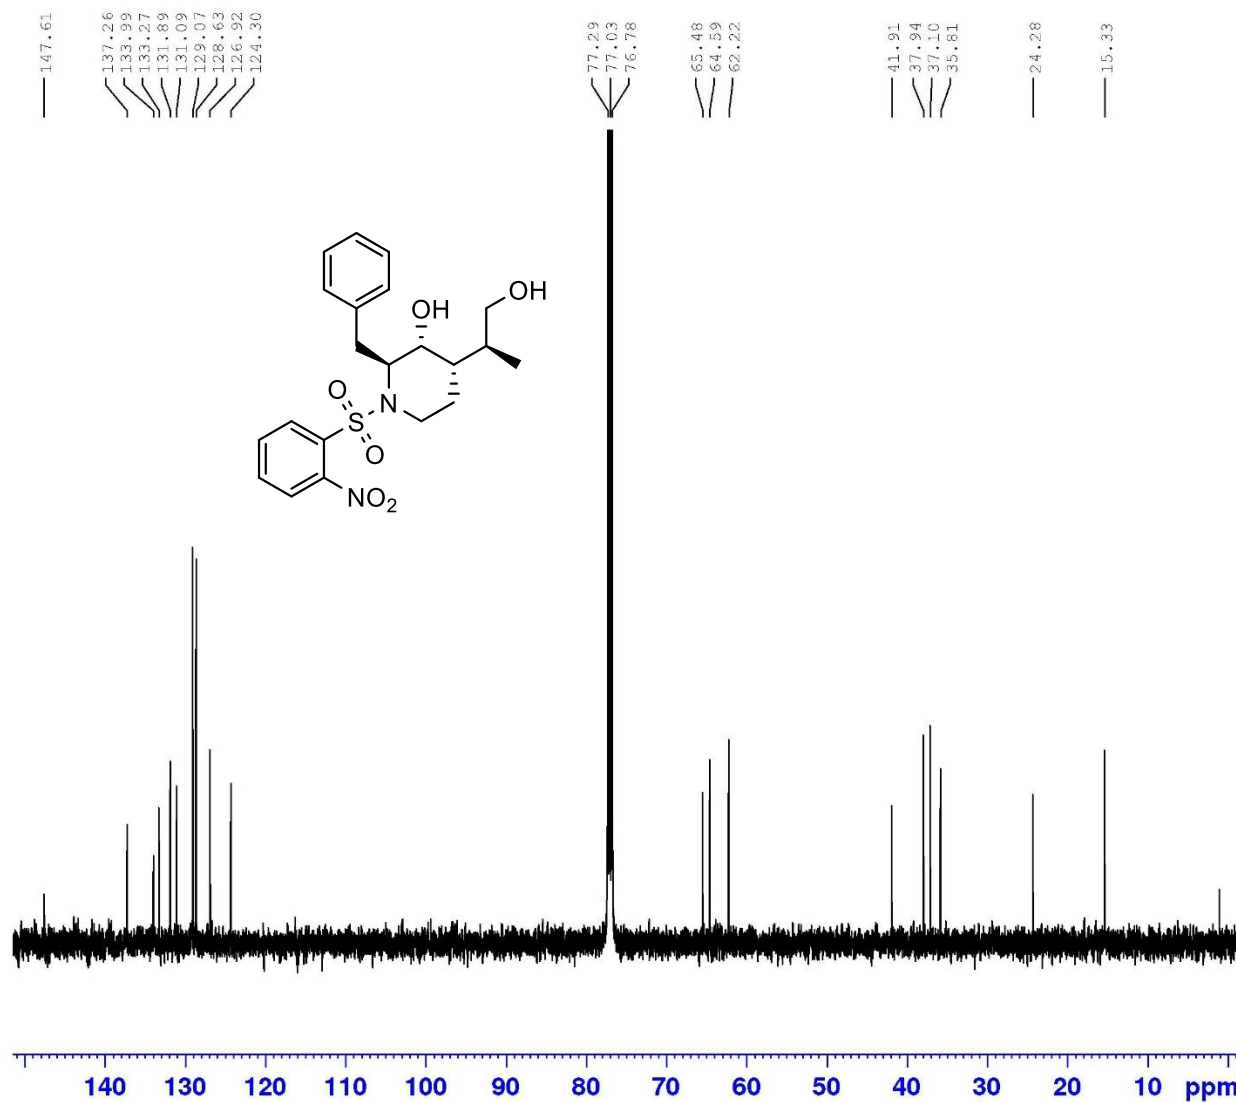

<sup>13</sup>C-NMR (R,S,S)-34f

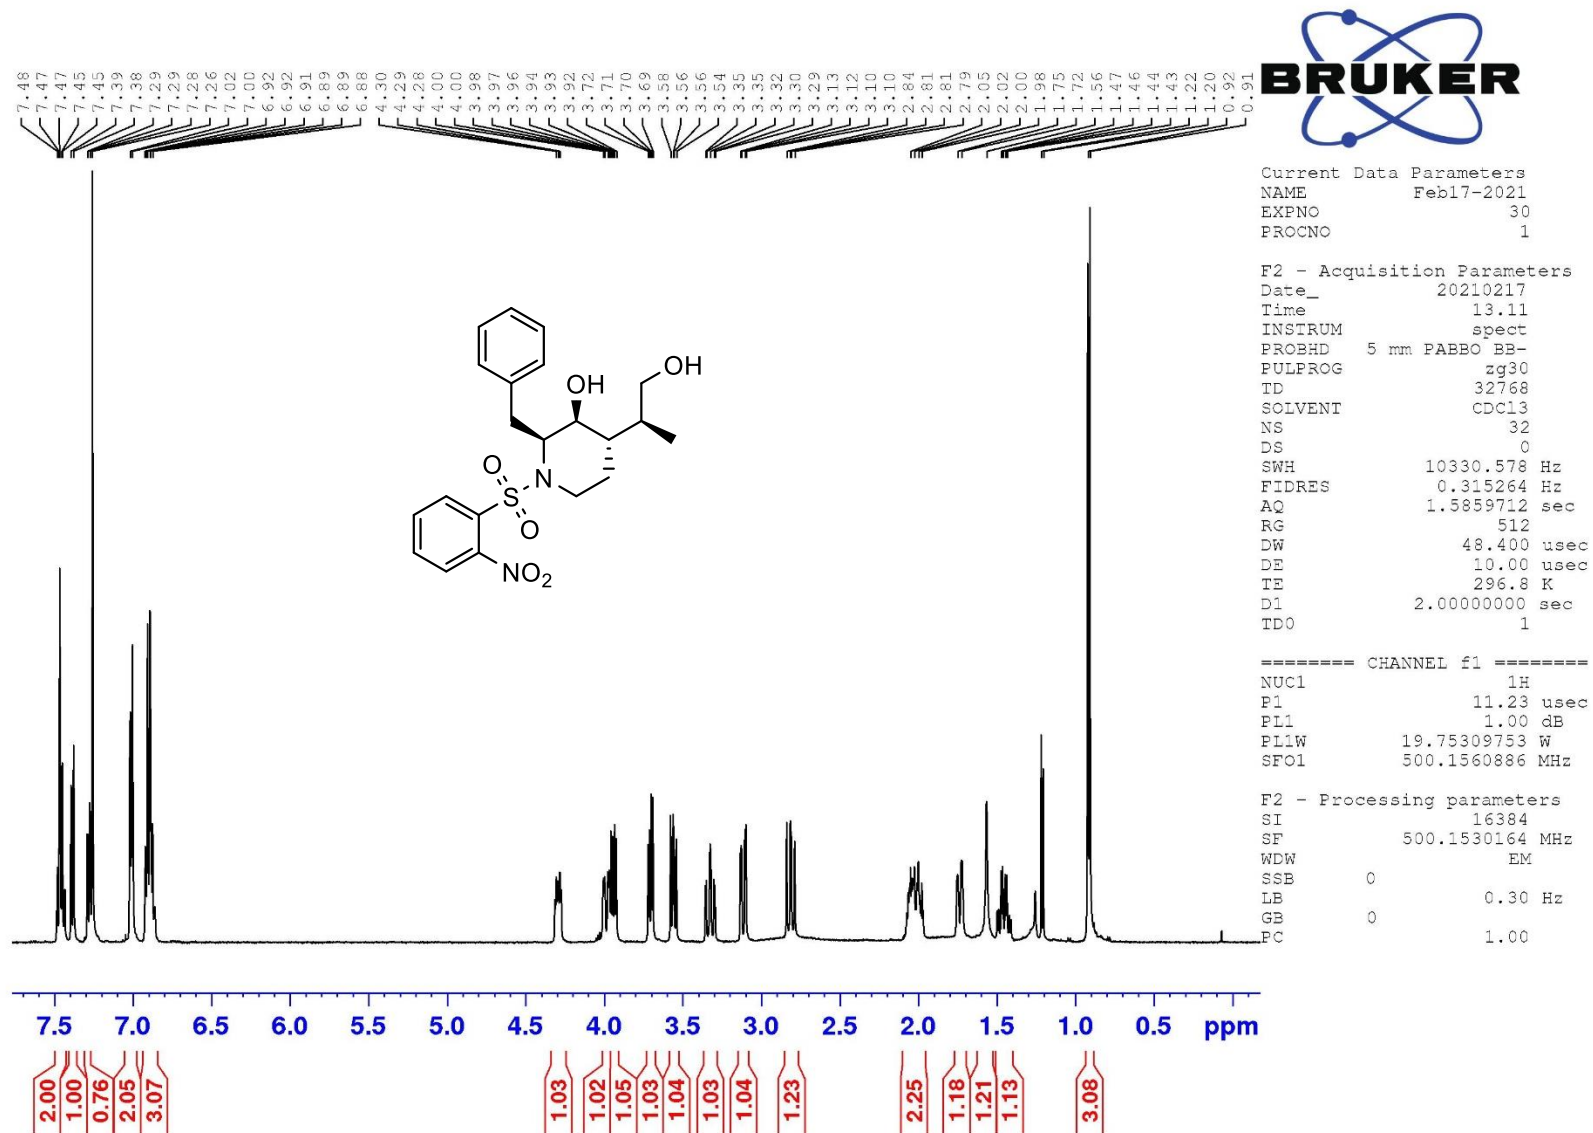

<sup>1</sup>H-NMR (S,S,S)-34f

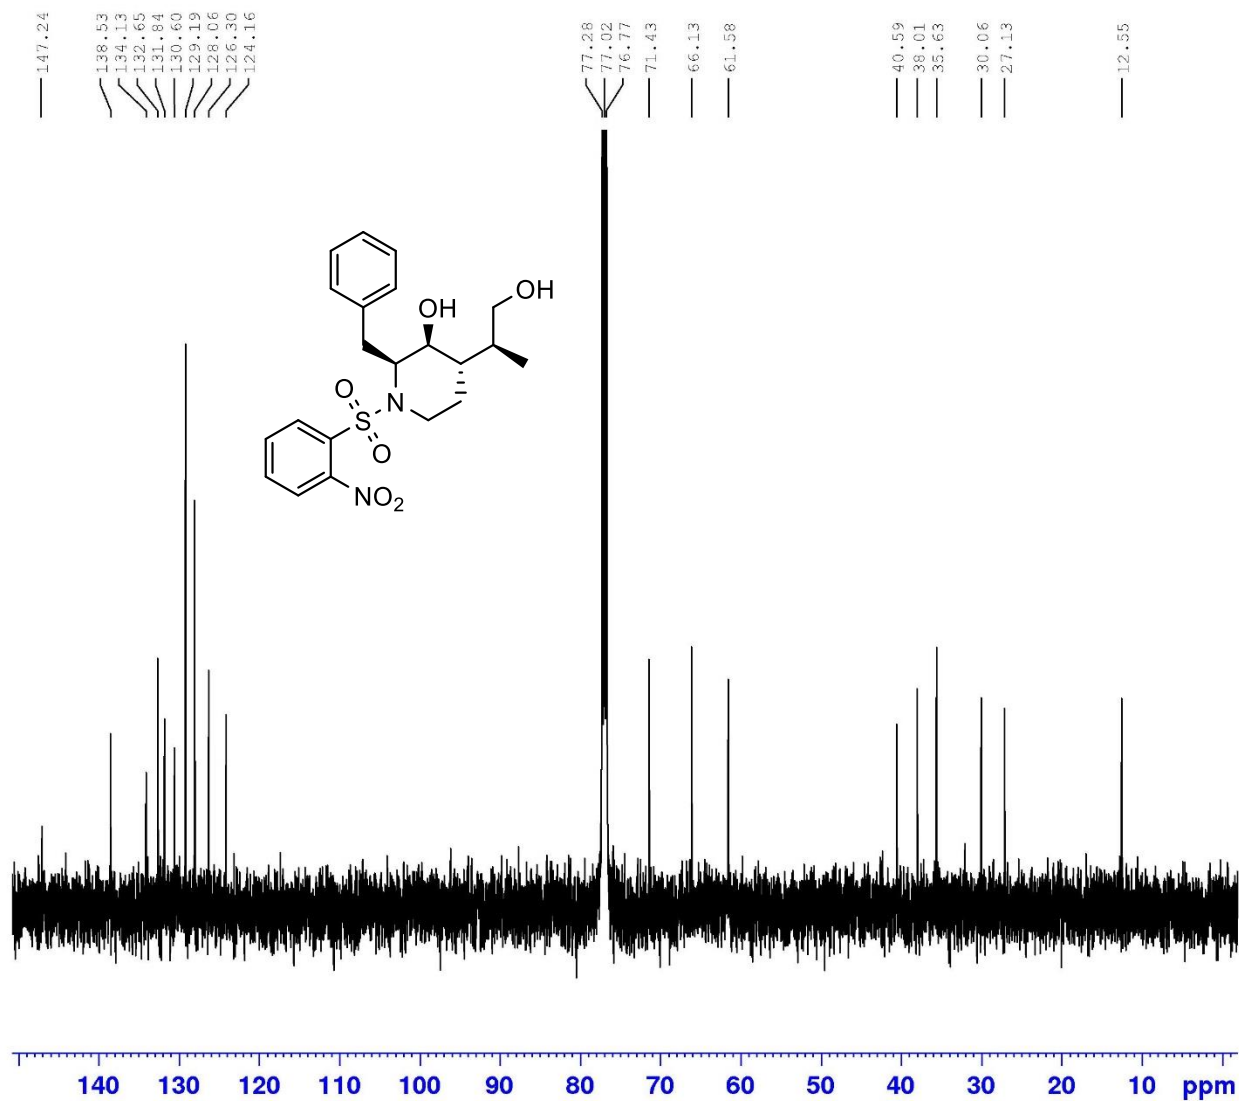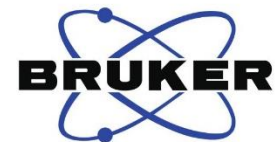

Current Data Parameters  
NAME Feb17-2021  
EXPNO 31  
PROCNO 1

F2 - Acquisition Parameters  
Date\_ 20210217  
Time 14.42  
INSIRUM spect  
PROBHD 5 mm PABBO BB-  
PULPROG zgpg30  
TD 65536  
SOLVENT CDCl3  
NS 1024  
DS 4  
SWH 32894.738 Hz  
FIDRES 0.501934 Hz  
AQ 0.9961472 sec  
RG 2580  
DW 15.200 usec  
DE 10.00 usec  
TE 296.8 K  
D1 2.00000000 sec  
D11 0.03000000 sec  
TD0 1

===== CHANNEL f1 =====  
NUC1 13C  
P1 10.20 usec  
PL1 1.50 dB  
PL1W 51.74793243 W  
SFO1 125.7761482 MHz

===== CHANNEL f2 =====  
CPDPRG[2] waltz16  
NUC2 1H  
PCPD2 100.00 usec  
PL2 1.00 dB  
PL12 19.99 dB  
PL13 21.00 dB  
PL2W 19.75309753 W  
PL12W 0.24925002 W  
PL13W 0.19753097 W  
SFO2 500.1550006 MHz

F2 - Processing parameters  
SI 32768  
SF 125.7635720 MHz  
WDW EM  
SSB 0  
LB 1.00 Hz  
GB 0  
PC 1.40

<sup>13</sup>C-NMR (S,S,S)-34f

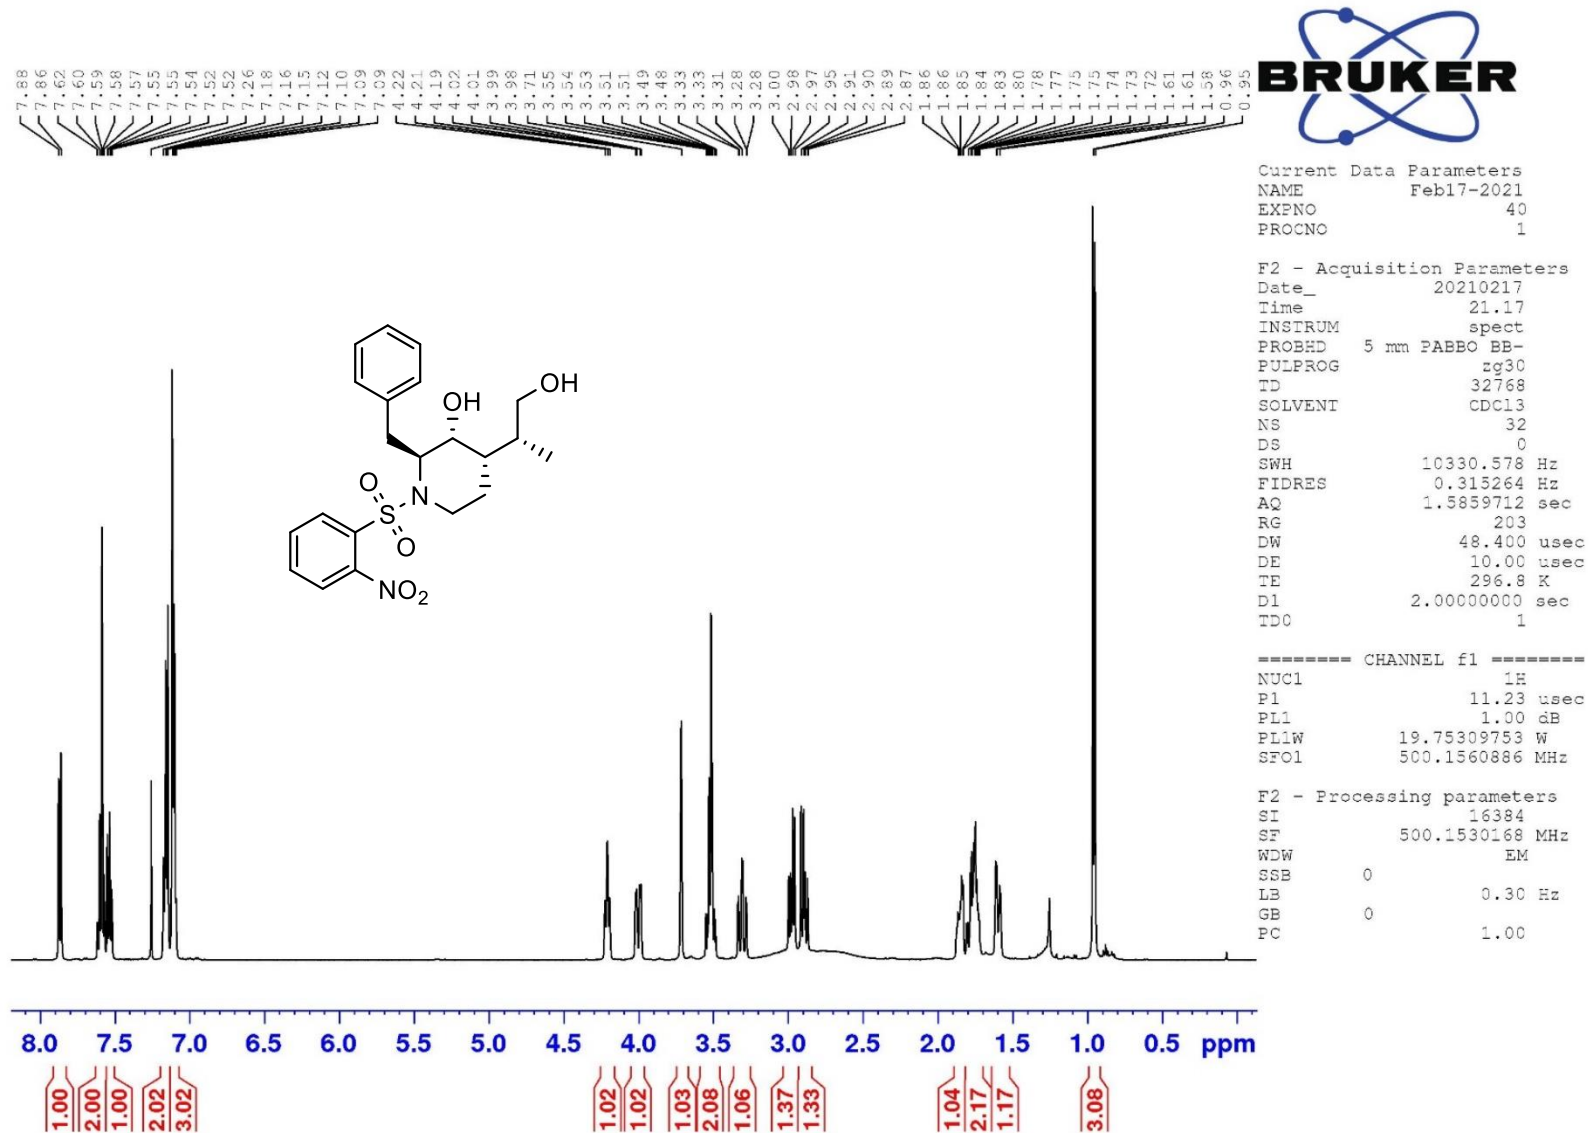

<sup>1</sup>H-NMR (R,S,R)-34f

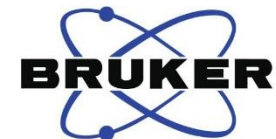

Current Data Parameters  
 NAME Feb17-2021  
 EXPNO 41  
 PROCNO 1

F2 - Acquisition Parameters  
 Date\_ 20210217  
 Time 22.10  
 INSTRUM spect  
 PROBHD 5 mm PABBO BB-  
 PULPROG zgpg30  
 TD 65536  
 SOLVENT CDC13  
 NS 1024  
 DS 4  
 SWH 32894.738 Hz  
 FIDRES 0.501934 Hz  
 AQ 0.9961472 sec  
 RG 2580  
 DW 15.200 usec  
 DE 10.00 usec  
 TE 296.8 K  
 D1 2.00000000 sec  
 D11 0.03000000 sec  
 TD0 1

===== CHANNEL f1 =====  
 NUC1 13C  
 P1 10.20 usec  
 PL1 1.50 dB  
 PL1W 51.74793243 W  
 SFO1 125.7761482 MHz

===== CHANNEL f2 =====  
 CPDPRG[2] waltz16  
 NUC2 1H  
 PCPD2 100.00 usec  
 PL2 1.00 dB  
 PL12 19.99 dB  
 PL13 21.00 dB  
 PL2W 19.75309753 W  
 PL12W 0.24925002 W  
 PL13W 0.19753097 W  
 SFO2 500.1550006 MHz

F2 - Processing parameters  
 SI 32768  
 SF 125.7635720 MHz  
 WDW EM  
 SSB 0  
 LB 1.00 Hz  
 GB 0  
 PC 1.40

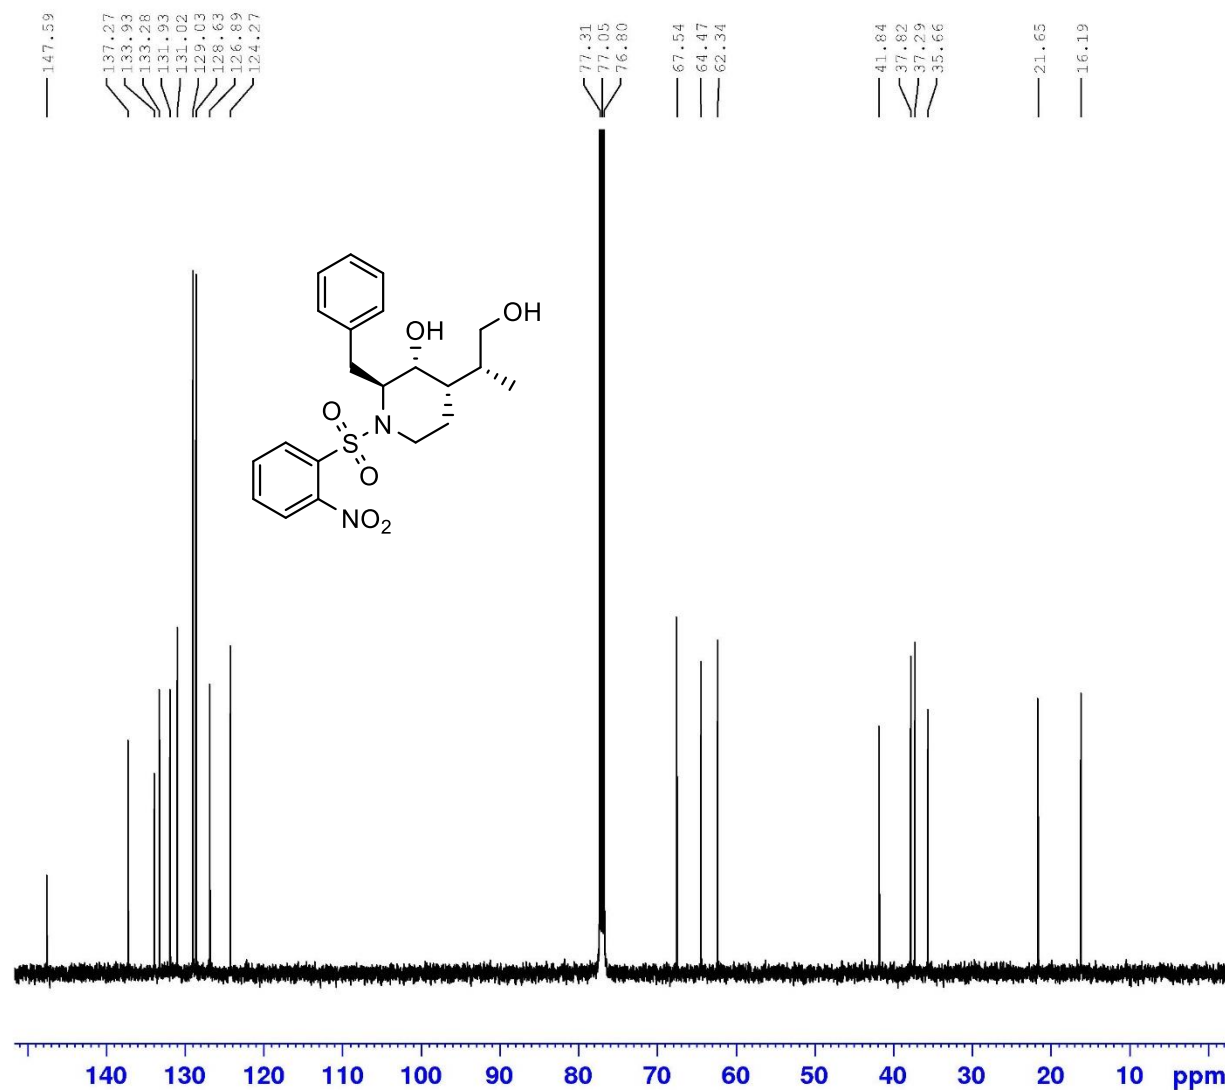

<sup>13</sup>C-NMR (R,S,R)-34f

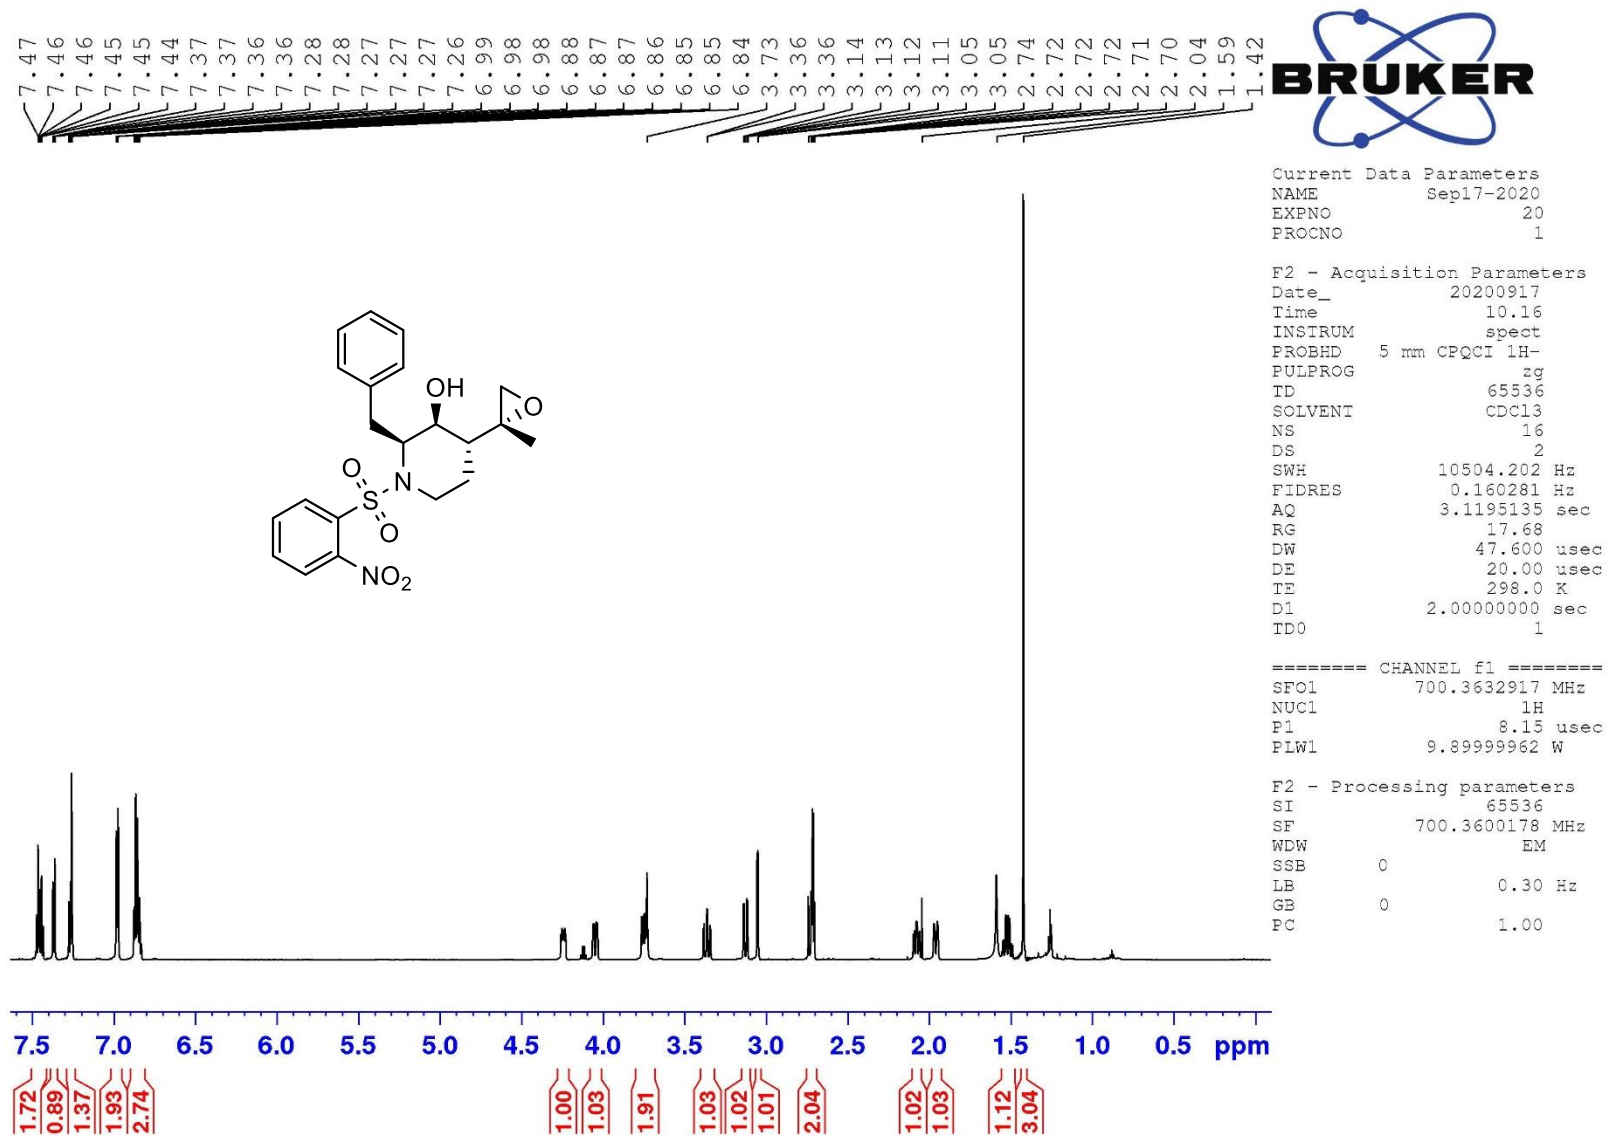

<sup>1</sup>H-NMR (S,R,R)-35f

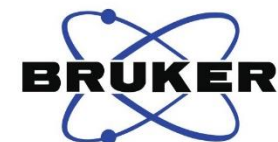

Current Data Parameters  
 NAME Sep17-2020  
 EXPNO 21  
 PROCNO 1

F2 - Acquisition Parameters  
 Date\_ 20200917  
 Time 10.41  
 INSTRUM spect  
 PROBHD 5 mm CPQCI 1H-  
 PULPROG zgpg30  
 TD 65356  
 SOLVENT CDCl3  
 NS 512  
 DS 4  
 SWH 40760.871 Hz  
 FIDRES 0.623675 Hz  
 AQ 0.8017003 sec  
 RG 182.53  
 DW 12.267 usec  
 DE 18.00 usec  
 TE 298.0 K  
 D1 2.00000000 sec  
 D11 0.03000000 sec  
 TDO 1

===== CHANNEL f1 =====  
 SFO1 176.1232717 MHz  
 NUC1 13C  
 P1 12.00 usec  
 PLW1 105.00000000 W

===== CHANNEL f2 =====  
 SFO2 700.3628014 MHz  
 NUC2 1H  
 CPDPRG[2] waltz16  
 PCPD2 65.00 usec  
 PLW2 9.89999962 W  
 PLW12 0.15564001 W  
 PLW13 0.07837200 W

F2 - Processing parameters  
 SI 131072  
 SF 176.1056620 MHz  
 WDW EM  
 SSB 0  
 LB 1.00 Hz  
 GB 0  
 PC 1.40

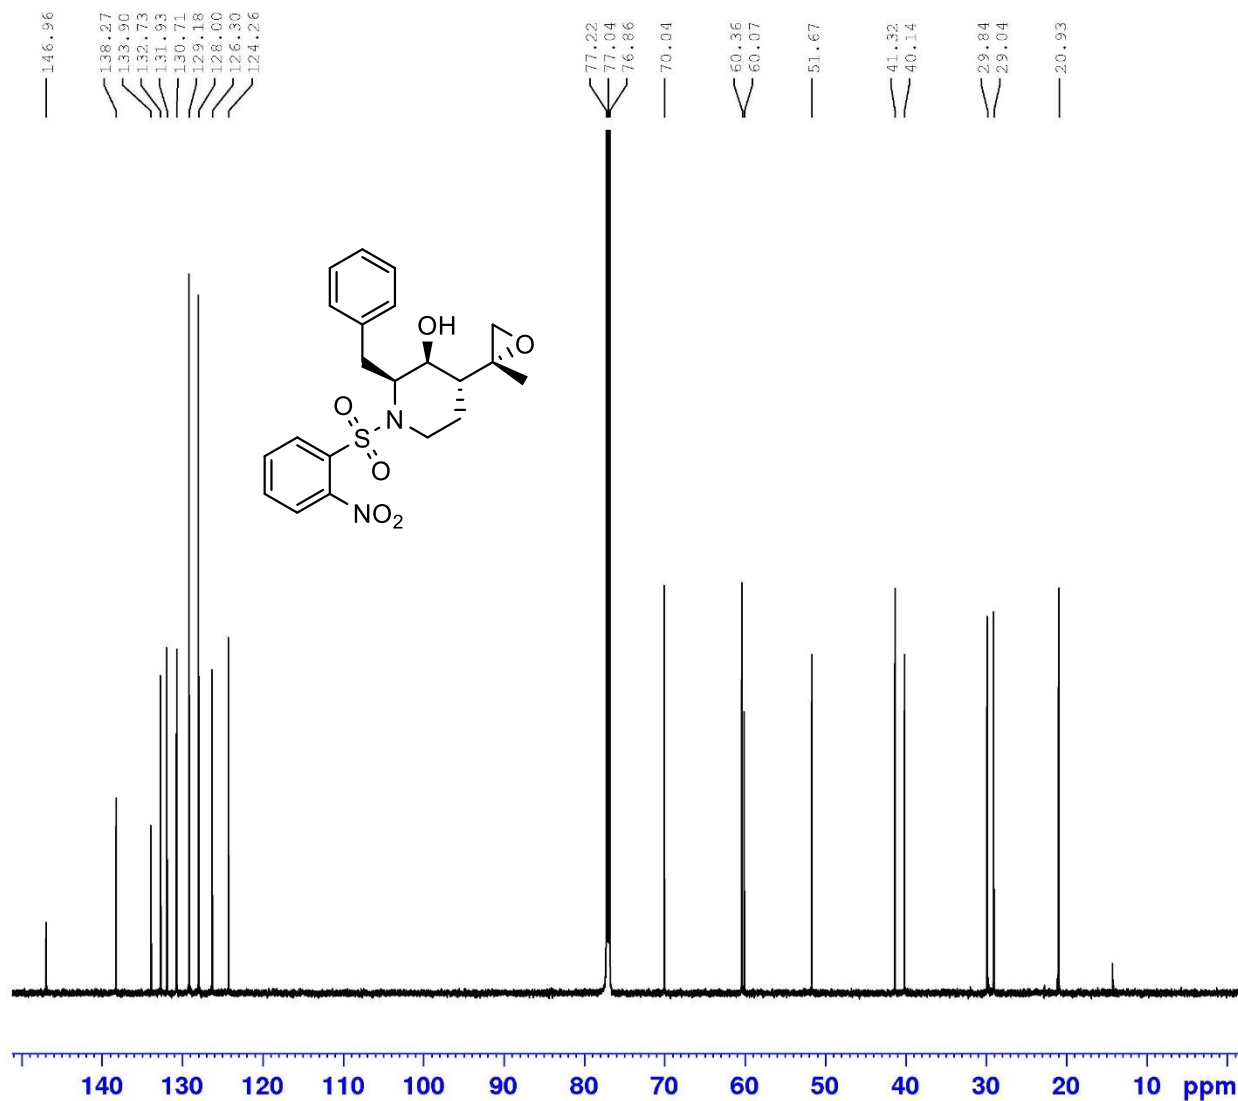

<sup>13</sup>C-NMR (S,R,R)-35f

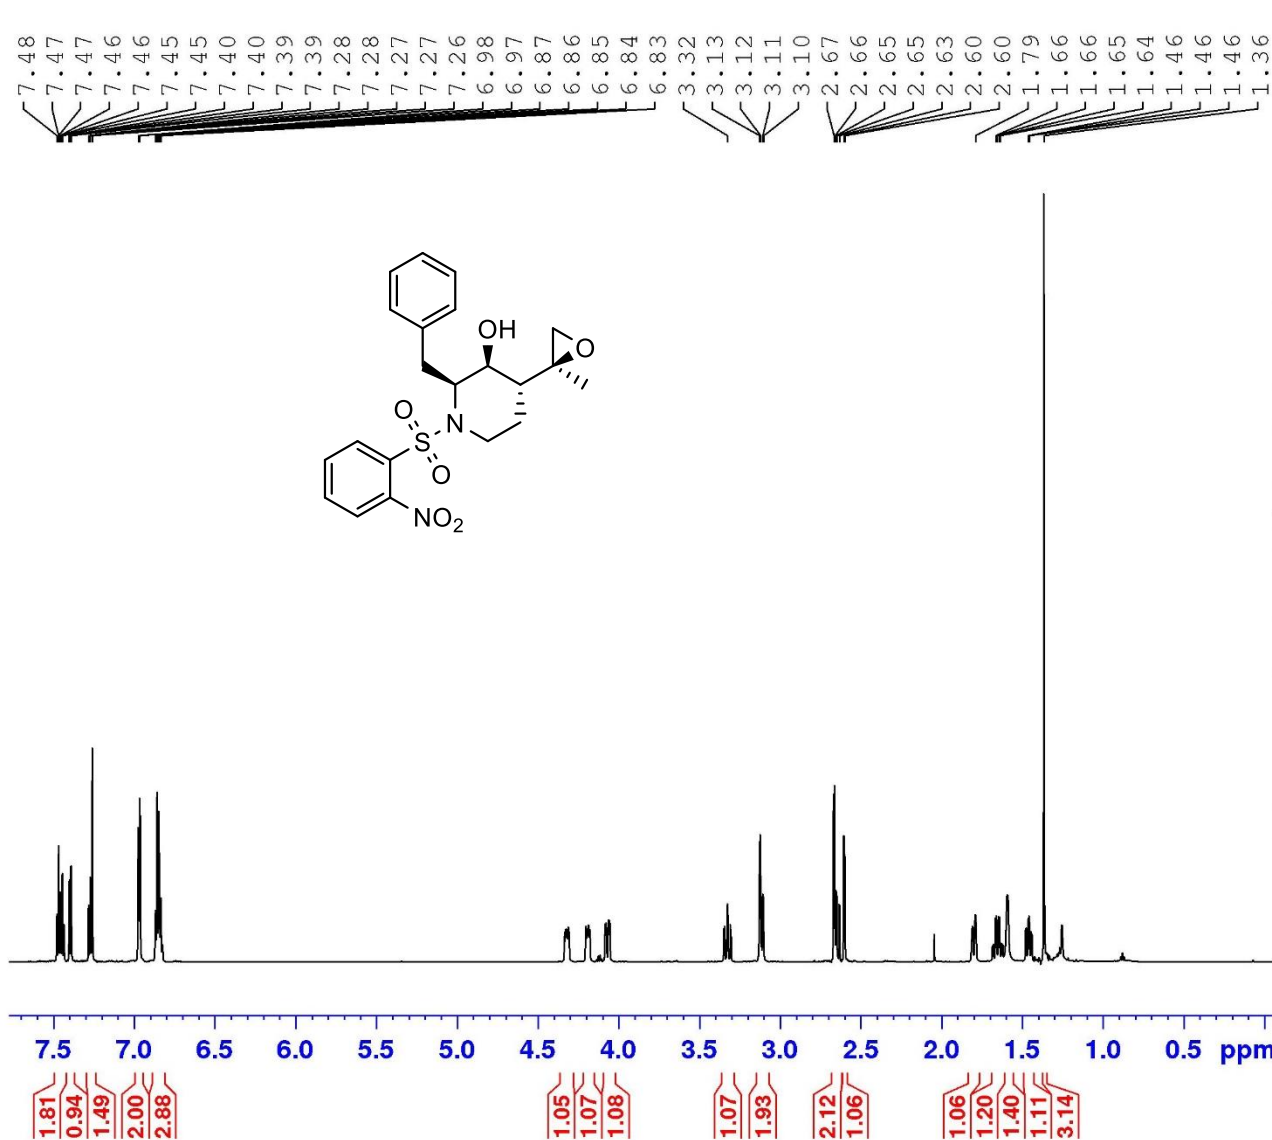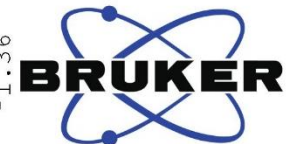

Current Data Parameters  
 NAME Oct05-2020  
 EXPNO 60  
 PROCNO 1

F2 - Acquisition Parameters  
 Date\_ 20201005  
 Time 11.09  
 INSTRUM spect  
 PROBHD 5 mm CPQCI 1H-  
 PULPROG zg  
 TD 65536  
 SOLVENT CDCl3  
 NS 16  
 DS 2  
 SWH 10504.202 Hz  
 FIDRES 0.160281 Hz  
 AQ 3.1195135 sec  
 RG 20.5  
 DW 47.600 usec  
 DE 20.00 usec  
 TE 298.0 K  
 D1 2.00000000 sec  
 TDO 1

===== CHANNEL f1 =====  
 SFO1 700.3632917 MHz  
 NUC1 1H  
 P1 8.15 usec  
 PLW1 9.89999962 W

F2 - Processing parameters  
 SI 65536  
 SF 700.3600166 MHz  
 WDW EM  
 SSB 0  
 LB 0.30 Hz  
 GB 0  
 PC 1.00

<sup>1</sup>H-NMR (S,R,S)-35f

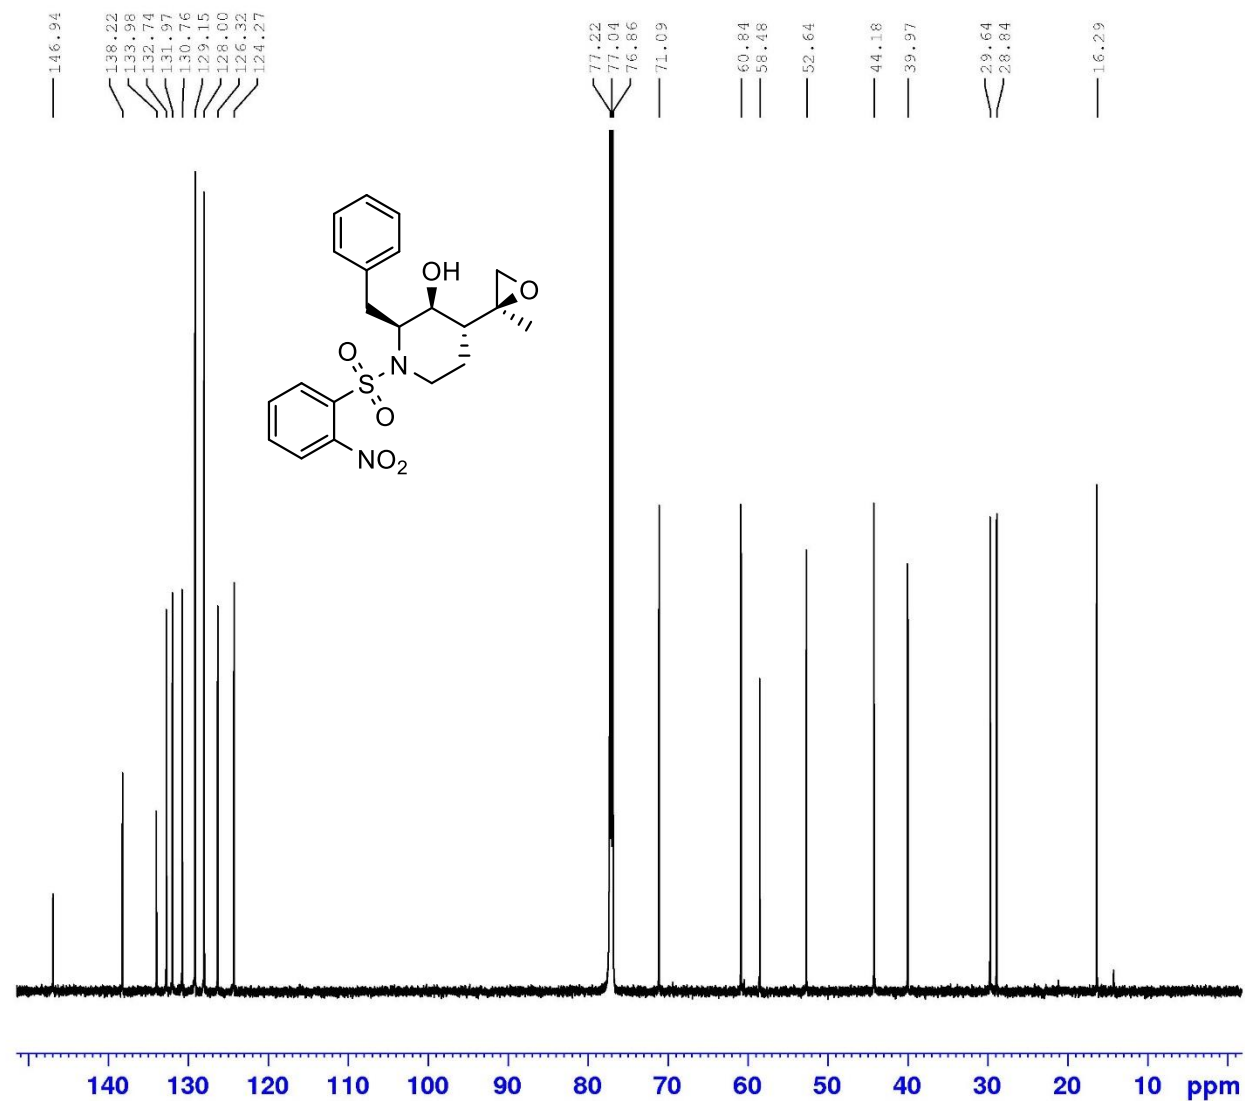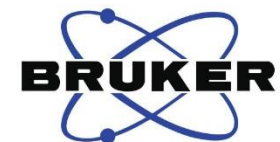

Current Data Parameters  
 NAME Sep17-2020  
 EXPNO 31  
 PROCNO 1

F2 - Acquisition Parameters  
 Date\_ 20200917  
 Time 14.19  
 INSTRUM spect  
 PROBHD 5 mm CPQCI 1H-  
 PULPROG zgpg30  
 TD 65356  
 SOLVENT CDCl3  
 NS 512  
 DS 4  
 SWH 40760.871 Hz  
 FIDRES 0.623675 Hz  
 AQ 0.8017003 sec  
 RG 182.53  
 DW 12.267 usec  
 DE 18.00 usec  
 TE 298.0 K  
 D1 2.00000000 sec  
 D11 0.03000000 sec  
 TD0 1

===== CHANNEL f1 =====  
 SFO1 176.1232717 MHz  
 NUC1 13C  
 P1 12.00 usec  
 PLW1 105.0000000 W

===== CHANNEL f2 =====  
 SFO2 700.3628014 MHz  
 NUC2 1H  
 CPDPRG[2] waltz16  
 PCPD2 65.00 usec  
 PLW2 9.89999962 W  
 PLW12 0.15564001 W  
 PLW13 0.07837200 W

F2 - Processing parameters  
 SI 131072  
 SF 176.1056620 MHz  
 WDW EM  
 SSB 0  
 LB 1.00 Hz  
 GB 0  
 PC 1.40

<sup>13</sup>C-NMR (S,R,S)-35f

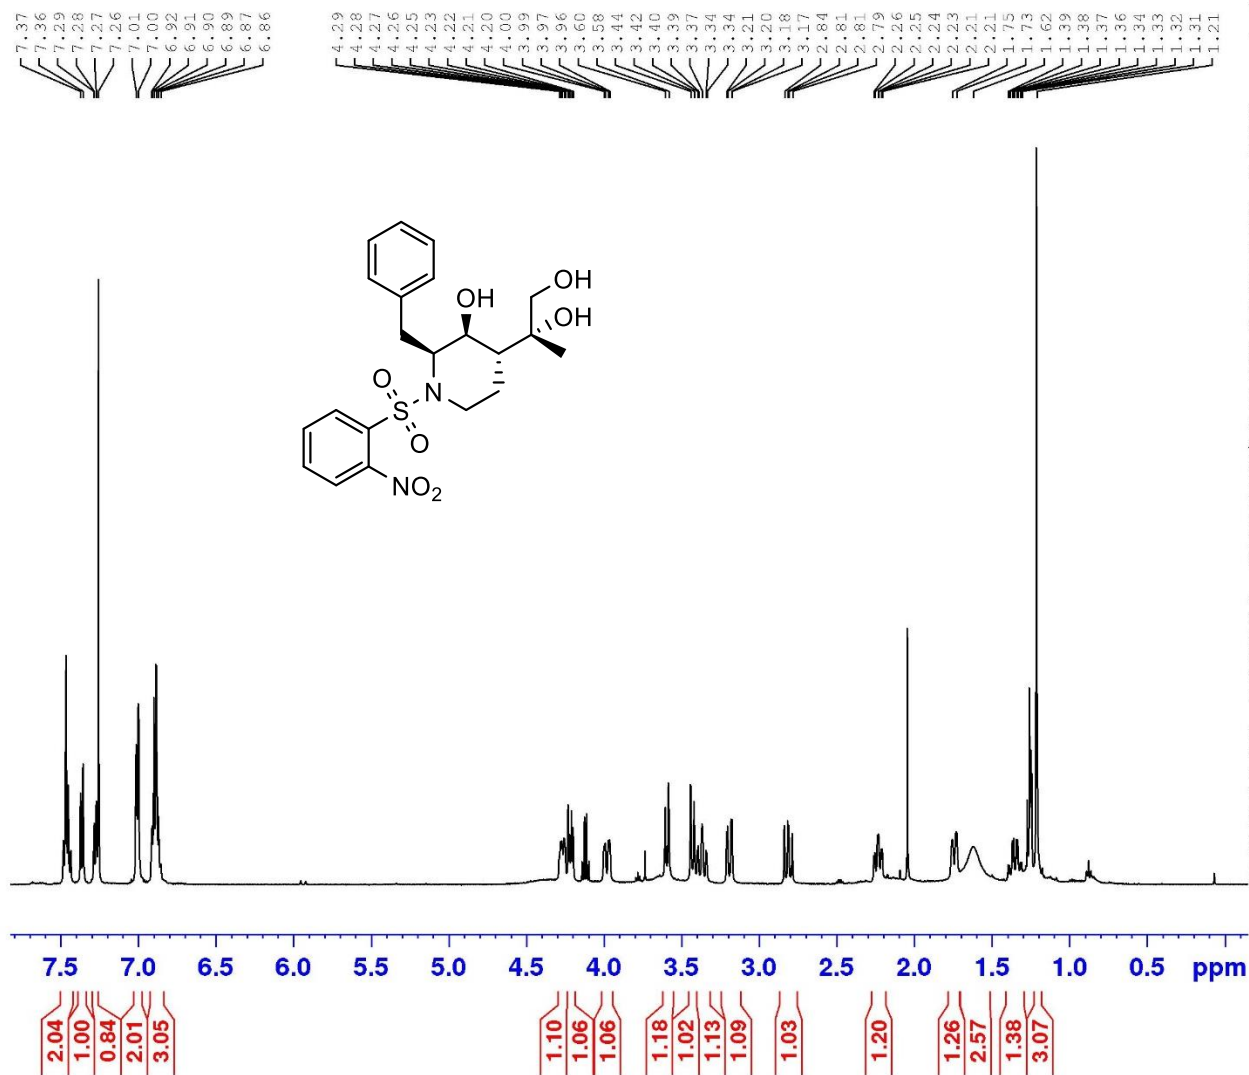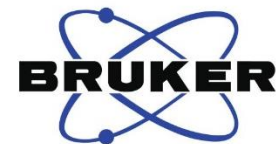

Current Data Parameters  
 NAME Jun15-2021  
 EXPNO 190  
 PROCNO 1

F2 - Acquisition Parameters  
 Date\_ 20210615  
 Time 14.54  
 INSTRUM spect  
 PROBHD 5 mm PABBO BB-  
 PULPROG zg30  
 TD 32768  
 SOLVENT CDCl3  
 NS 32  
 DS 0  
 SWH 10330.578 Hz  
 FIDRES 0.315264 Hz  
 AQ 1.5859712 sec  
 RG 406  
 DW 48.400 usec  
 DE 10.00 usec  
 TE 296.0 K  
 D1 2.00000000 sec  
 TDO 1

===== CHANNEL f1 =====  
 NUC1 1H  
 P1 11.23 usec  
 PL1 1.00 dB  
 PL1W 19.75309753 W  
 SFO1 500.1560886 MHz

F2 - Processing parameters  
 SI 16384  
 SF 500.1530169 MHz  
 WDW EM  
 SSB 0  
 LB 0.30 Hz  
 GB 0  
 PC 1.00

<sup>1</sup>H-NMR (S,R,R)-36f

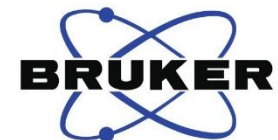

Current Data Parameters  
 NAME Jun15-2021  
 EXPNO 191  
 PROCNO 1

F2 - Acquisition Parameters  
 Date\_ 20210615  
 Time 15.48  
 INSTRUM spect  
 PROBHD 5 mm PABBO BB-  
 PULPROG zgpg30  
 TD 65536  
 SOLVENT CDCl3  
 NS 1024  
 DS 4  
 SWH 32894.738 Hz  
 FIDRES 0.501934 Hz  
 AQ 0.9961472 sec  
 RG 2580  
 DW 15.200 usec  
 DE 10.00 usec  
 TE 300.0 K  
 D1 2.00000000 sec  
 D11 0.03000000 sec  
 TD0 1

===== CHANNEL f1 =====  
 NUC1 13C  
 P1 10.20 usec  
 PL1 1.50 dB  
 PL1W 51.74793243 W  
 SFO1 125.7761482 MHz

===== CHANNEL f2 =====  
 CPDPRG[2] waltz16  
 NUC2 1H  
 PCPD2 100.00 usec  
 PL2 1.00 dB  
 PL12 19.99 dB  
 PL13 21.00 dB  
 PL2W 19.75309753 W  
 PL12W 0.24925002 W  
 PL13W 0.19753097 W  
 SFO2 500.1550006 MHz

F2 - Processing parameters  
 SI 32768  
 SF 125.7635720 MHz  
 WDW EM  
 SSB 0  
 LB 1.00 Hz  
 GB 0  
 PC 1.40

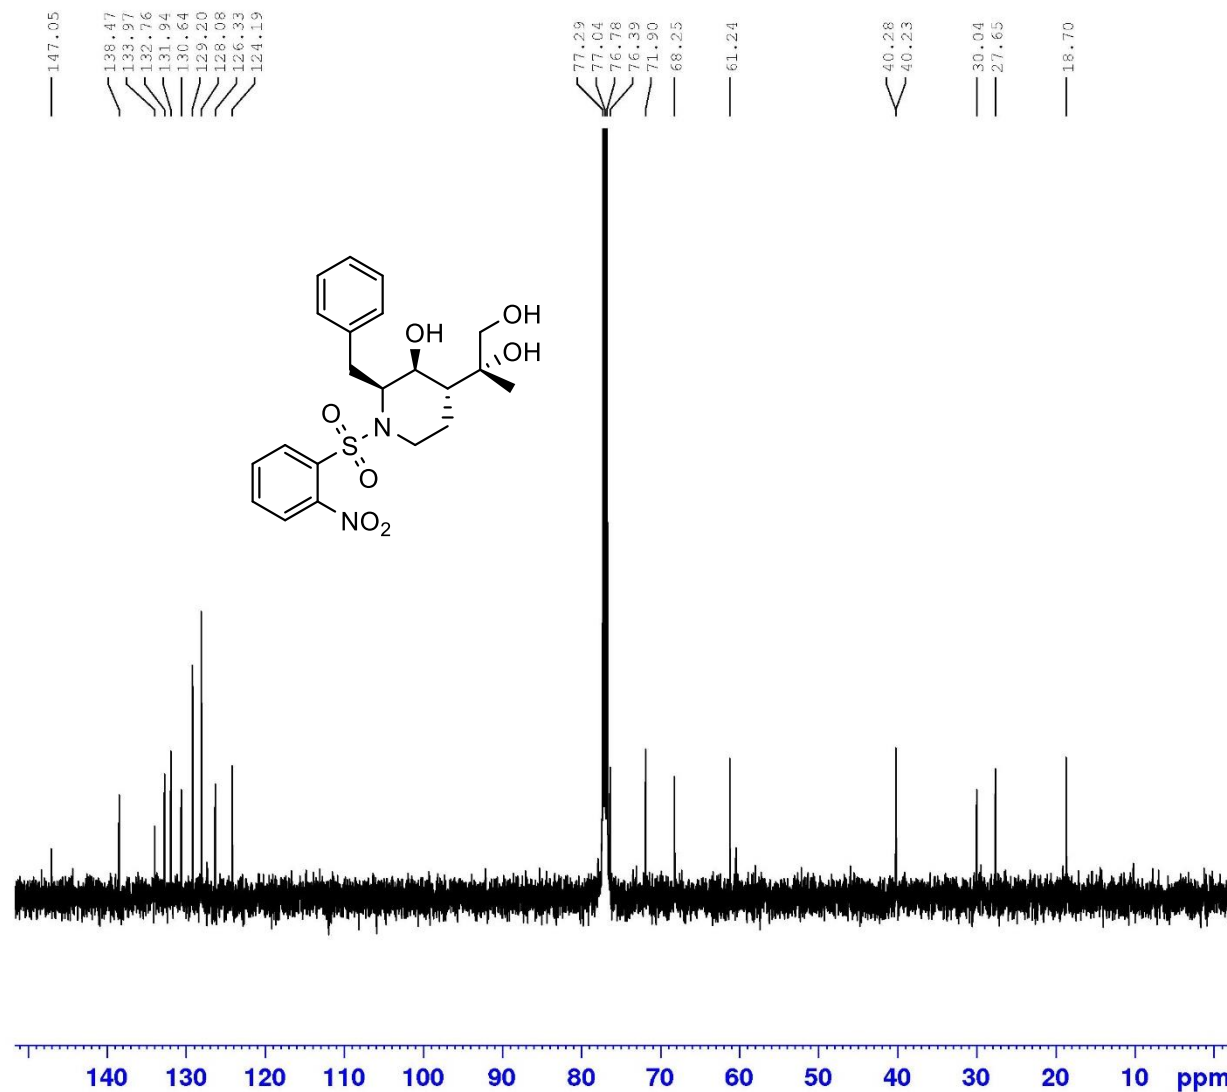

<sup>13</sup>C-NMR (S,R,R)-36f

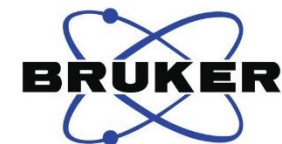

Current Data Parameters  
 NAME Jul06-2021  
 EXPNO 70  
 PROCNO 1

F2 - Acquisition Parameters  
 Date\_ 20210706  
 Time 11.02  
 INSTRUM spect  
 PROBHD 5 mm PABBO BB-  
 PULPROG zg30  
 TD 32768  
 SOLVENT CDCl3  
 NS 64  
 DS 0  
 SWH 10330.578 Hz  
 FIDRES 0.315264 Hz  
 AQ 1.5859712 sec  
 RG 512  
 DW 48.400 usec  
 DE 10.00 usec  
 TE 296.0 K  
 D1 2.00000000 sec  
 TD0 1

===== CHANNEL f1 =====  
 NUC1 1H  
 P1 11.23 usec  
 PL1 1.00 dB  
 PL1W 19.75309753 W  
 SFO1 500.1360886 MHz

F2 - Processing parameters  
 SI 16384  
 SF 500.1330169 MHz  
 WDW EM  
 SSB 0  
 LB 0.30 Hz  
 GB 0  
 PC 1.00

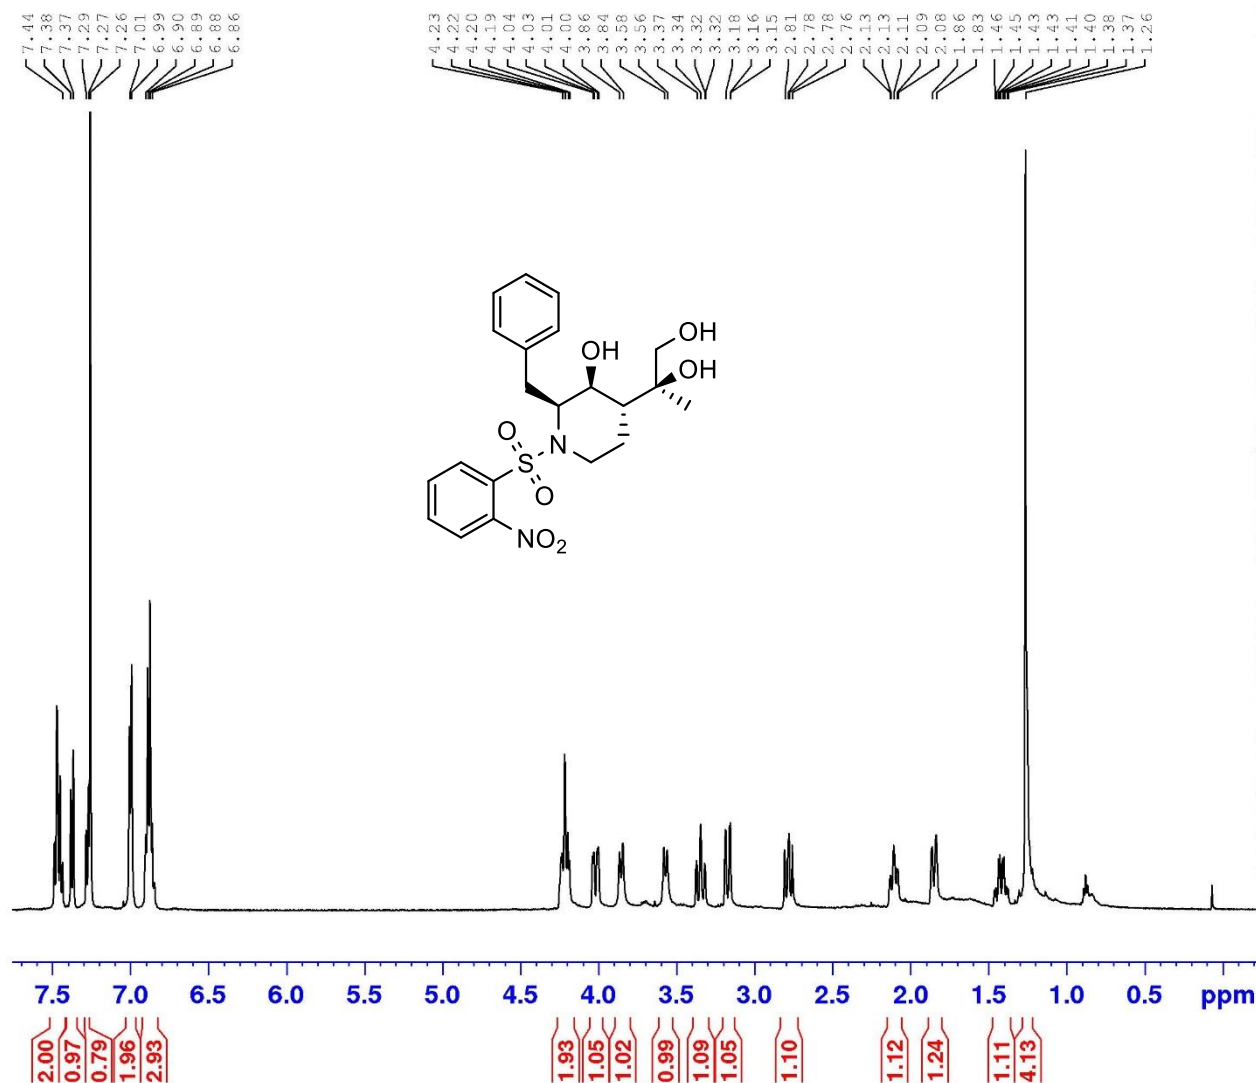

<sup>1</sup>H-NMR (S,R,S)-36f

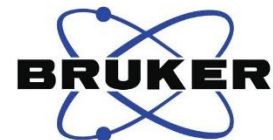

Current Data Parameters  
 NAME Jun15-2021  
 EXPNO 201  
 PROCNO 1

F2 - Acquisition Parameters  
 Date\_ 20210615  
 Time 23.03  
 INSTRUM spect  
 PROBHD 5 mm PABBO BB-  
 PULPROG zgpg30  
 TD 65536  
 SOLVENT CDCl3  
 NS 1024  
 DS 4  
 SWH 32894.738 Hz  
 FIDRES 0.501934 Hz  
 AQ 0.9961472 sec  
 RG 2580  
 DW 15.200 usec  
 DE 10.00 usec  
 TE 296.0 K  
 D1 2.00000000 sec  
 D11 0.03000000 sec  
 TD0 1

===== CHANNEL f1 =====  
 NUC1 13C  
 P1 10.20 usec  
 PL1 1.50 dB  
 PL1W 51.74793243 W  
 SFO1 125.7761482 MHz

===== CHANNEL f2 =====  
 CPDPRG[2] waltz16  
 NUC2 1H  
 PCPD2 100.00 usec  
 PL2 1.00 dB  
 PL12 19.99 dB  
 PL13 21.00 dB  
 PL2W 19.75309753 W  
 PL12W 0.24925002 W  
 PL13W 0.19753097 W  
 SFO2 500.1550006 MHz

F2 - Processing parameters  
 SI 32768  
 SF 125.7635720 MHz  
 WDW EM  
 SSB 0  
 LB 1.00 Hz  
 GB 0  
 PC 1.40

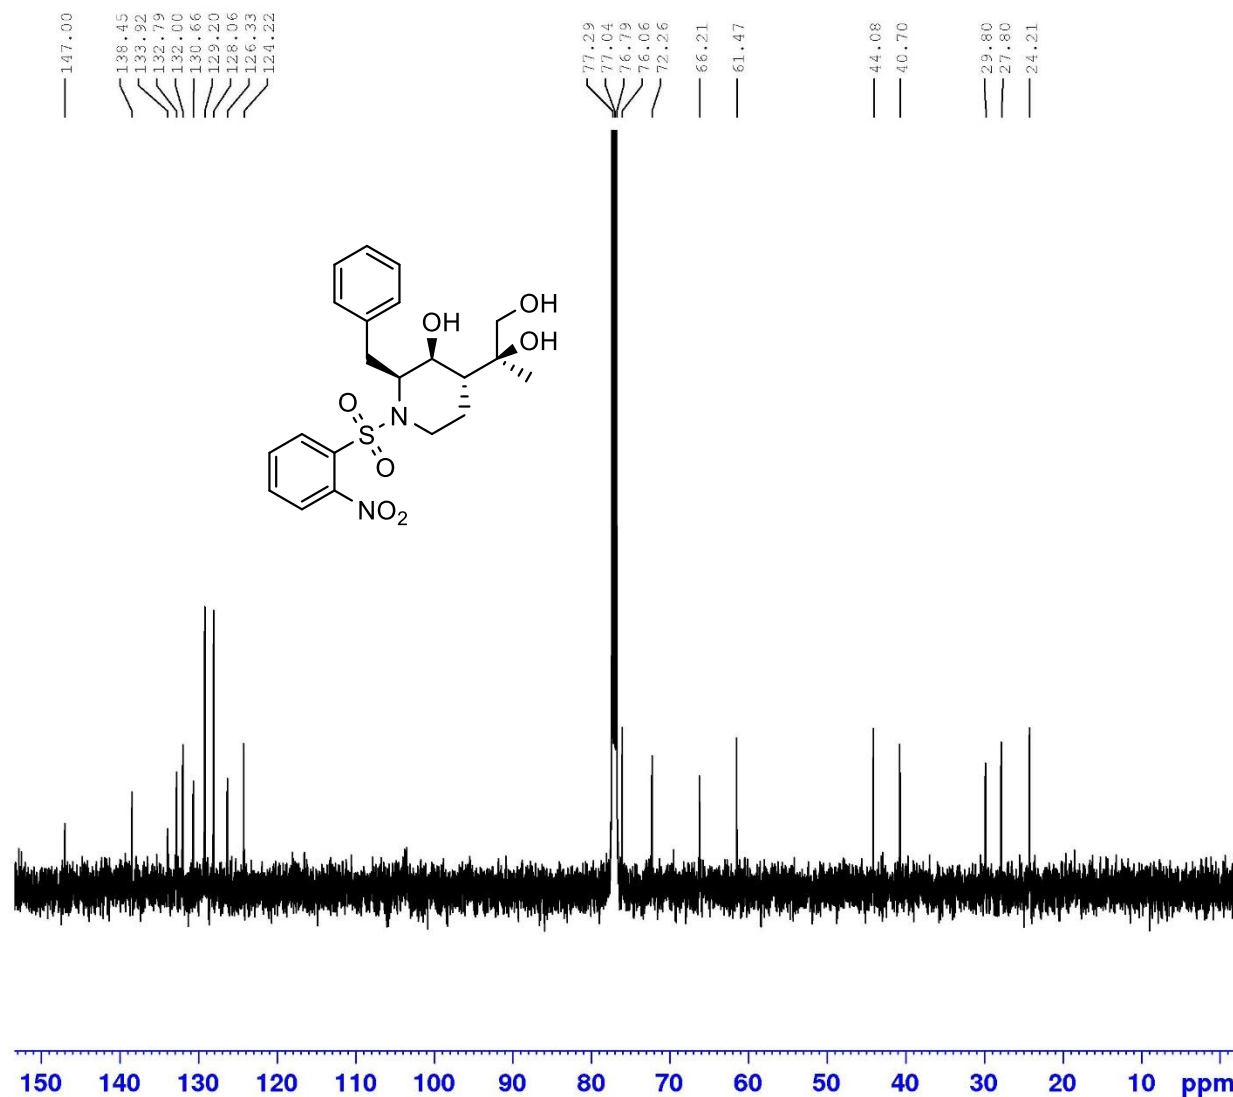

<sup>13</sup>C-NMR (S,R,S)-36f

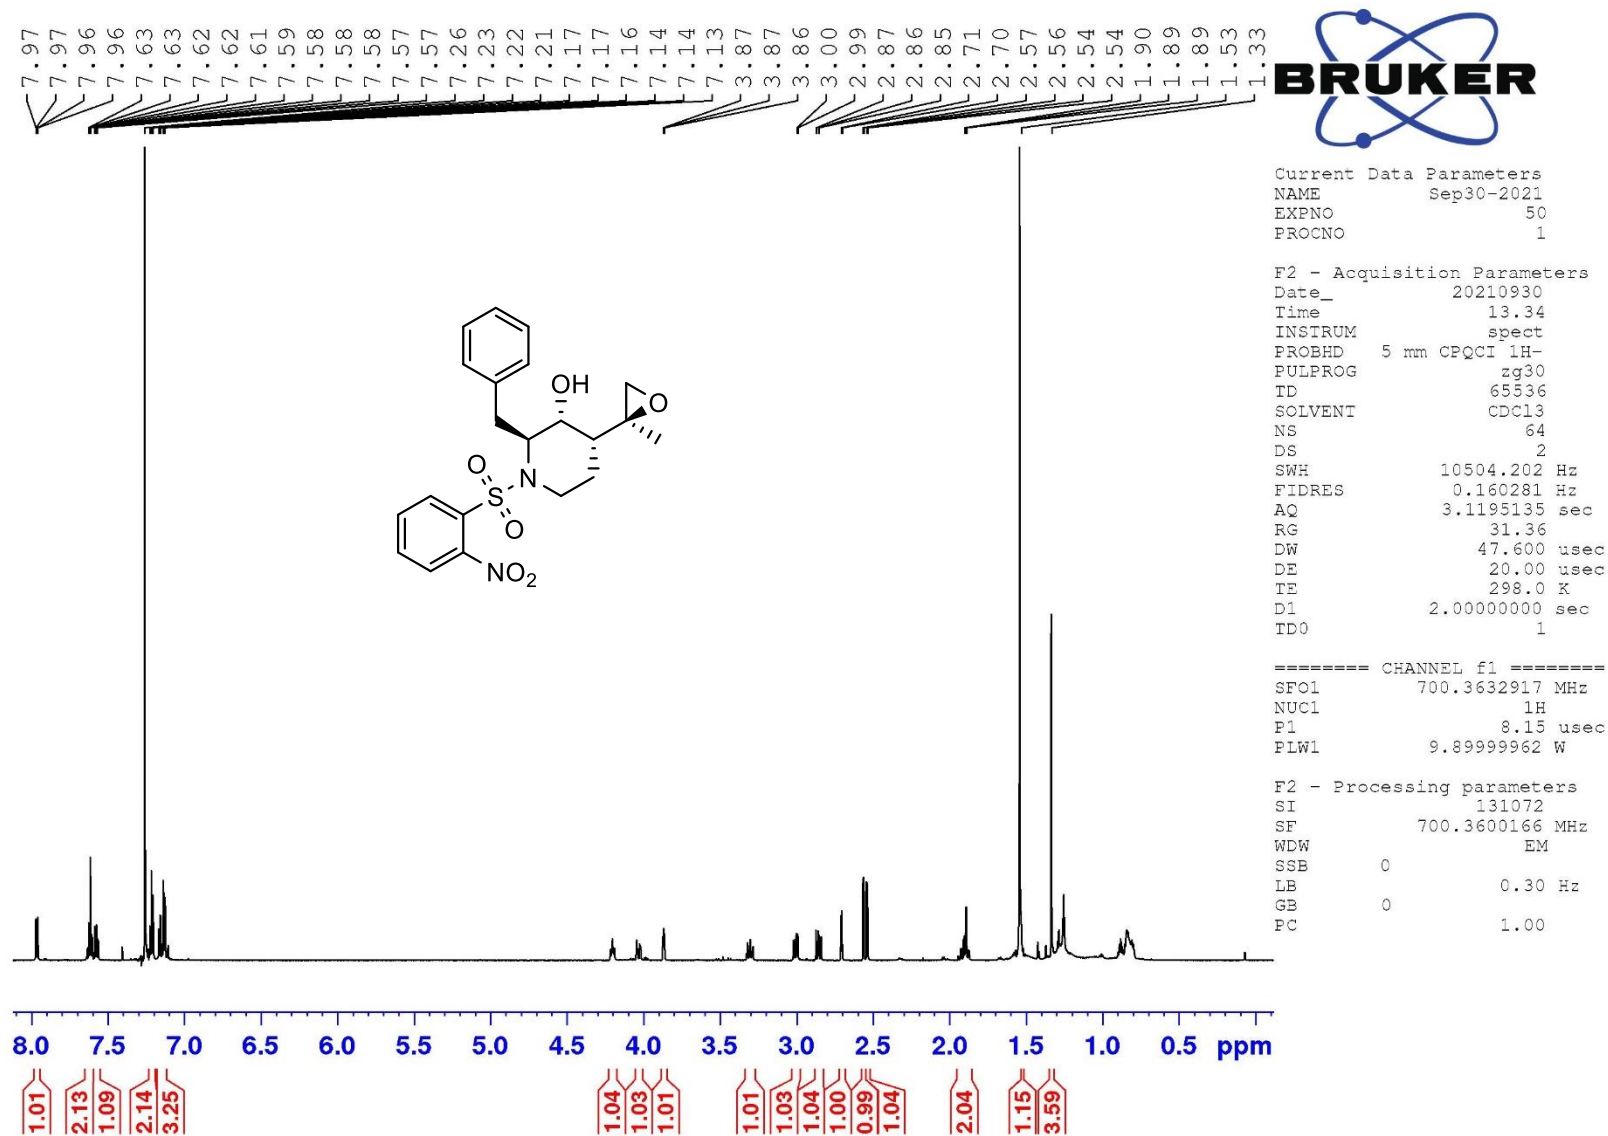

<sup>1</sup>H-NMR (R,R,S)-35f

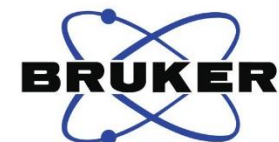

Current Data Parameters  
 NAME Sep02-2021  
 EXPNO 21  
 PROCNO 1

F2 - Acquisition Parameters  
 Date\_ 20210902  
 Time 13.19  
 INSTRUM spect  
 PROBHD 5 mm CPQCI 1H-  
 PULPROG zgpg30  
 TD 65356  
 SOLVENT CDCl3  
 NS 2048  
 DS 4  
 SWH 40760.871 Hz  
 FIDRES 0.623675 Hz  
 AQ 0.8017003 sec  
 RG 182.53  
 DW 12.267 usec  
 DE 18.00 usec  
 TE 298.0 K  
 D1 2.00000000 sec  
 D11 0.03000000 sec  
 TD0 1

===== CHANNEL f1 =====  
 SFO1 176.1232717 MHz  
 NUC1 13C  
 P1 12.00 usec  
 PLW1 105.0000000 W

===== CHANNEL f2 =====  
 SFO2 700.3628014 MHz  
 NUC2 1H  
 CPDPRG[2] waltz16  
 PCPD2 65.00 usec  
 PLW2 9.89999962 W  
 PLW12 0.15564001 W  
 PLW13 0.07837200 W

F2 - Processing parameters  
 SI 131072  
 SF 176.1056620 MHz  
 WDW EM  
 SSB 0  
 LB 1.00 Hz  
 GB 0  
 PC 1.40

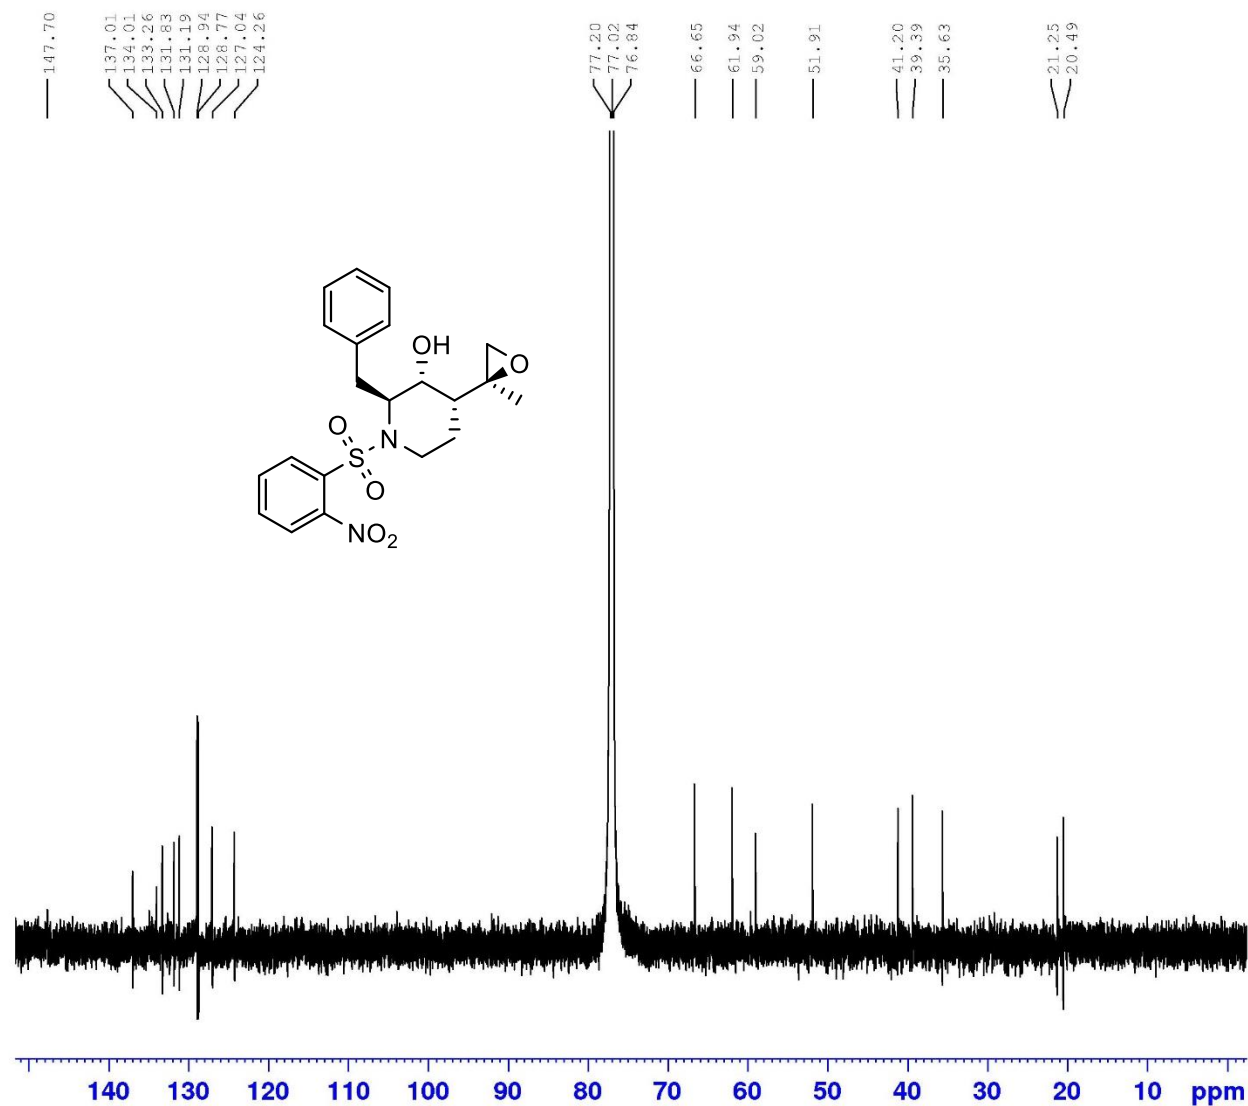

<sup>13</sup>C-NMR (R,R,S)-35f

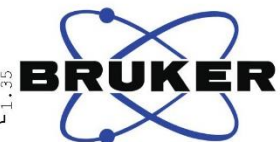

Current Data Parameters  
 NAME Jul14-2021  
 EXPNO 20  
 PROCNO 1

F2 - Acquisition Parameters  
 Date\_ 20210714  
 Time 11.28  
 INSTRUM spect  
 PROBHD 5 mm PABBO BB-  
 PULPROG zg30  
 TD 32768  
 SOLVENT CDCl3  
 NS 32  
 DS 0  
 SWH 10330.578 Hz  
 FIDRES 0.315264 Hz  
 AQ 1.5859712 sec  
 RG 512  
 DW 48.400 usec  
 DE 10.00 usec  
 TE 296.0 K  
 D1 2.00000000 sec  
 TDO 1

===== CHANNEL f1 =====  
 NUC1 1H  
 P1 11.23 usec  
 PL1 1.00 dB  
 PL1W 19.75309753 W  
 SFO1 500.1560886 MHz

F2 - Processing parameters  
 SI 16384  
 SF 500.1530160 MHz  
 WDW EM  
 SSB 0  
 LB 0.30 Hz  
 GB 0  
 PC 1.00

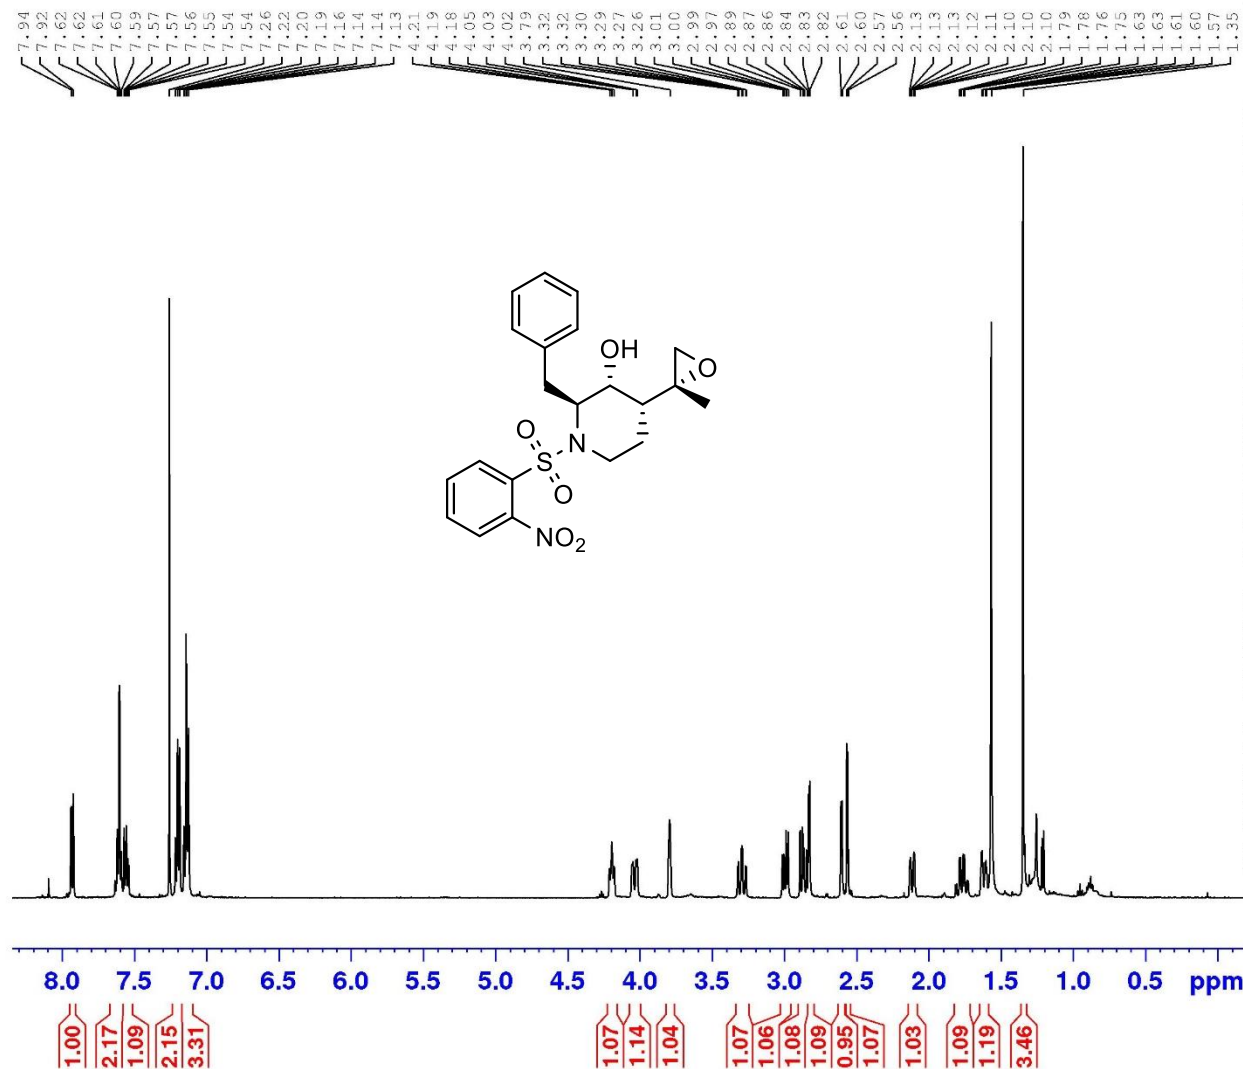

<sup>1</sup>H-NMR (R,R,R)-35f

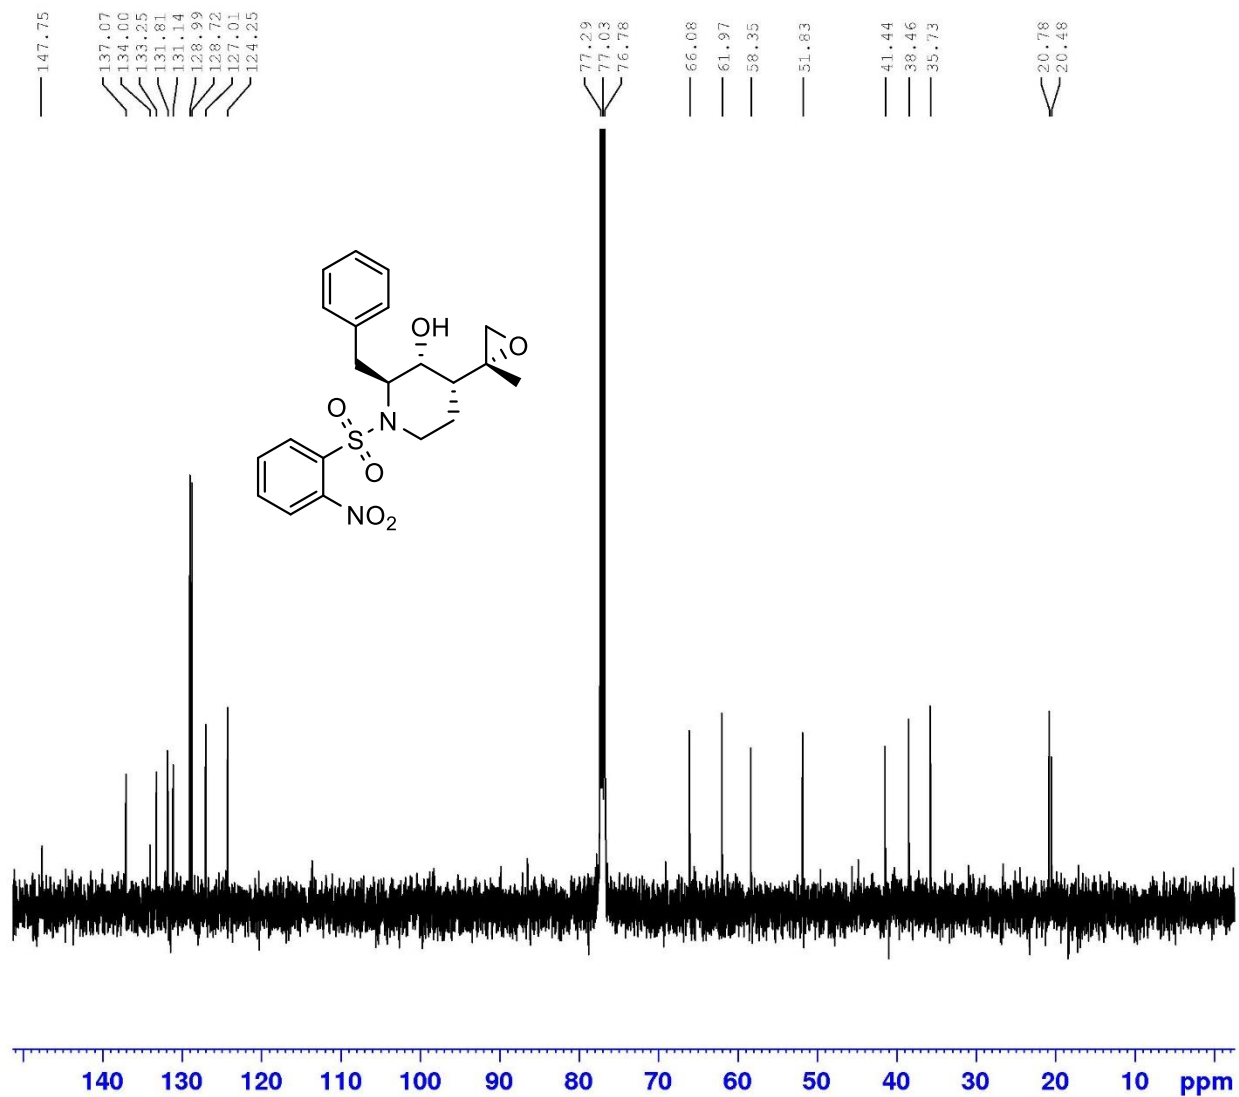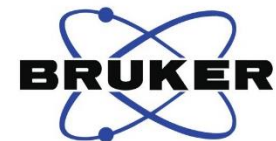

Current Data Parameters  
NAME Jul14-2021  
EXPNO 21  
PROCNO 1

F2 - Acquisition Parameters  
Date\_ 20210714  
Time 12.22  
INSTRUM spect  
PROBHD 5 mm PABBO BB-  
PULPROG zgpg30  
TD 65536  
SOLVENT CDC13  
NS 1024  
DS 4  
SWH 32894.738 Hz  
FIDRES 0.501934 Hz  
AQ 0.9961472 sec  
RG 2580  
DW 15.200 usec  
DE 10.00 usec  
TE 296.0 K  
D1 2.00000000 sec  
D11 0.03000000 sec  
TD0 1

===== CHANNEL f1 =====  
NUC1 13C  
P1 10.20 usec  
PL1 1.50 dB  
PL1W 51.74793243 W  
SFO1 125.7761482 MHz

===== CHANNEL f2 =====  
CPDPRG[2] waltz16  
NUC2 1H  
PCPD2 100.00 usec  
PL2 1.00 dB  
PL12 19.99 dB  
PL13 21.00 dB  
PL2W 19.75309753 W  
PL12W 0.24925002 W  
PL13W 0.19753097 W  
SFO2 500.1550006 MHz

F2 - Processing parameters  
SI 32768  
SF 125.7635720 MHz  
WDW EM  
SSB 0  
LB 1.00 Hz  
GB 0  
PC 1.40

<sup>13</sup>C-NMR (R,R,R)-35f

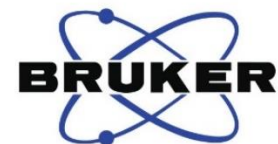

Current Data Parameters  
 NAME Sep01-2021  
 EXPNO 120  
 PROCNO 1

F2 - Acquisition Parameters  
 Date\_ 20210901  
 Time 19.59  
 INSTRUM spect  
 PROBHD 5 mm PABBO BB-  
 PULPROG zg30  
 TD 32768  
 SOLVENT CDC13  
 NS 32  
 DS 0  
 SWH 10330.578 Hz  
 FIDRES 0.315264 Hz  
 AQ 1.5859712 sec  
 RG 645  
 DW 48.400 usec  
 DE 10.00 usec  
 TE 296.0 K  
 D1 2.0000000 sec  
 TDC 1

----- CHANNEL f1 -----  
 NUC1 1H  
 P1 11.23 usec  
 PL1 1.00 dB  
 PL1W 19.75309753 W  
 SFO1 500.1560886 MHz

F2 - Processing parameters  
 SI 16384  
 SF 500.1530161 MHz  
 WDW EM  
 SSB 0  
 LB 0.30 Hz  
 GB 0  
 PC 1.00

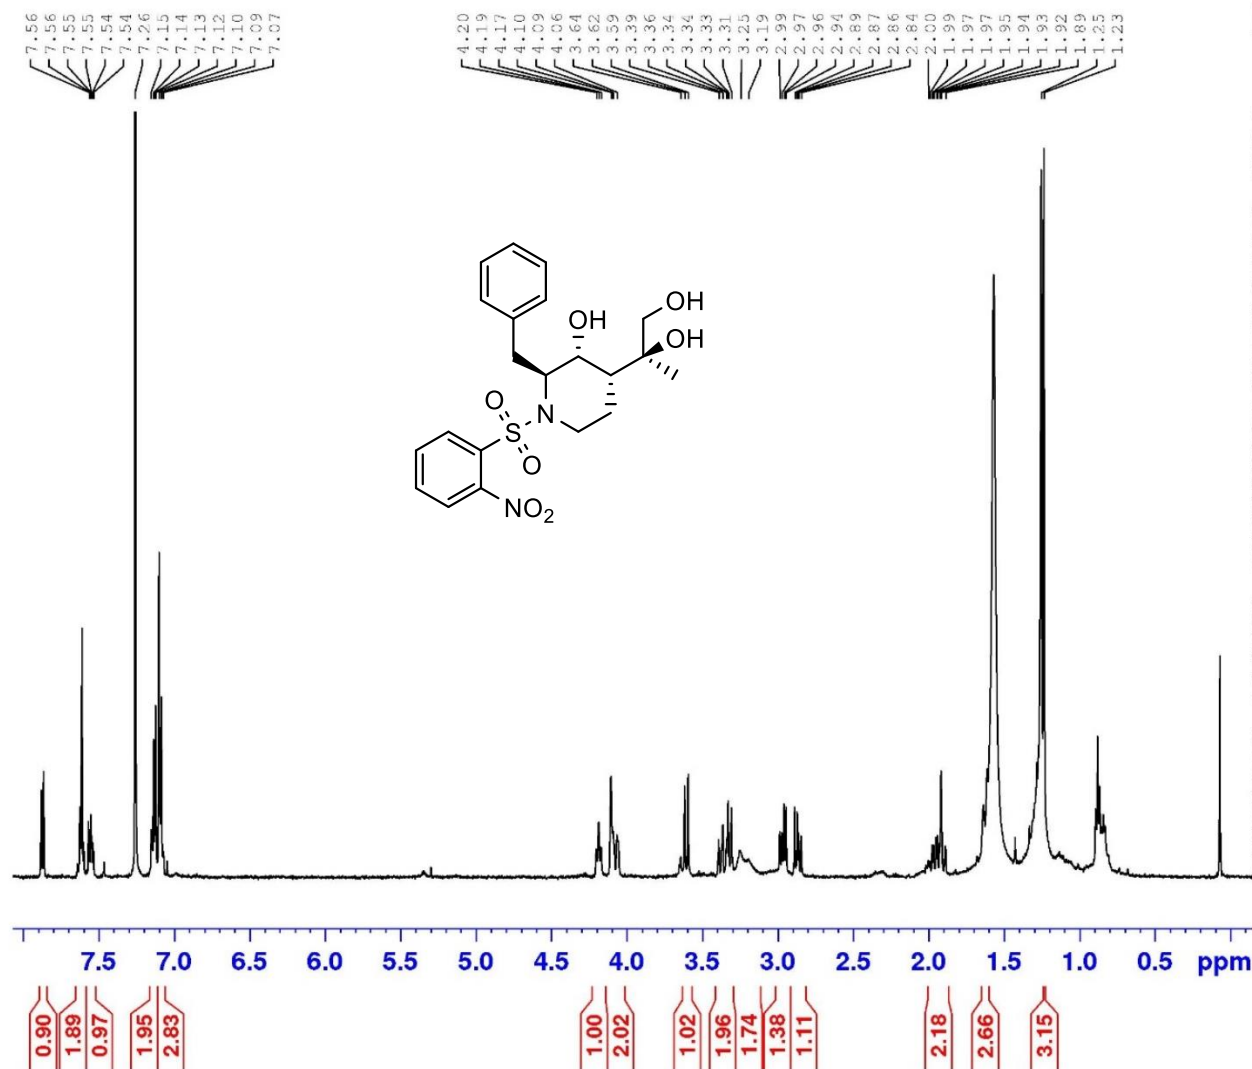

<sup>1</sup>H-NMR (*R,R,S*)-36f

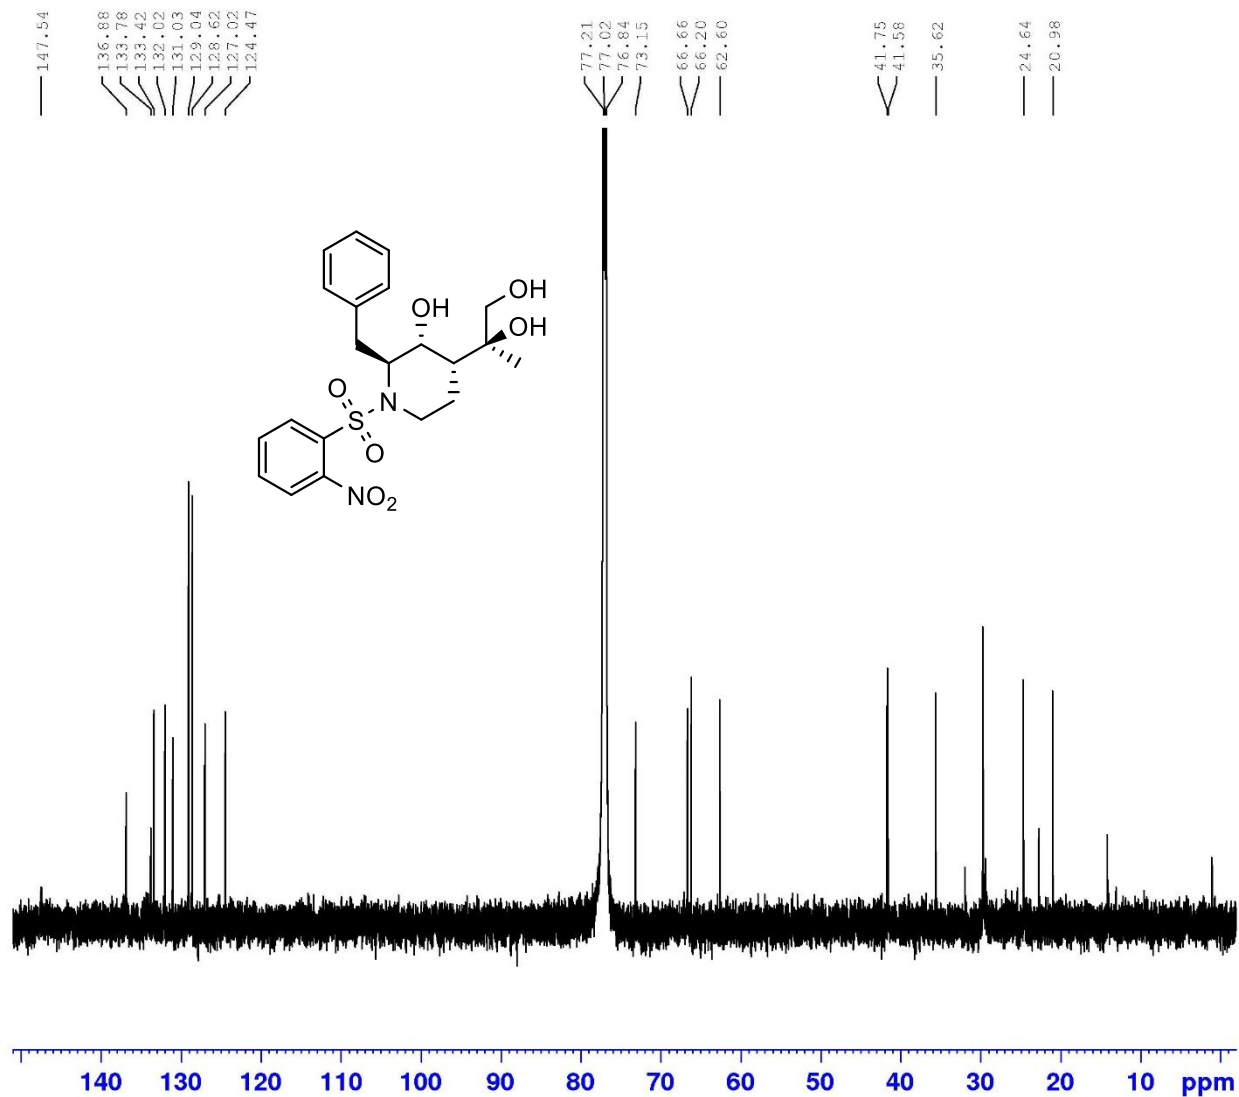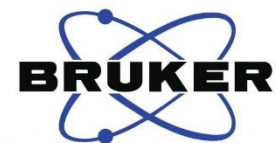

Current Data Parameters  
NAME Sep03-2021  
EXPNO 31  
PROCNO 1

F2 - Acquisition Parameters  
Date\_ 20210903  
Time 13.52  
INSTRUM spect  
PROBHD 5 mm CPQCI 1H-  
PULPROG zgpg30  
TD 65356  
SOLVENT CDCl3  
NS 1024  
DS 4  
SWH 40760.871 Hz  
FIDRES 0.623675 Hz  
AQ 0.8017003 sec  
RG 182.53  
DW 12.267 usec  
DE 18.00 usec  
TE 298.0 K  
D1 2.00000000 sec  
D11 0.03000000 sec  
TD0 1

===== CHANNEL f1 =====  
SFO1 176.1232717 MHz  
NUC1 13C  
P1 12.00 usec  
PLW1 105.00000000 W

===== CHANNEL f2 =====  
SFO2 700.3628014 MHz  
NUC2 1H  
CPDPRG[2] waltz16  
PCPD2 65.00 usec  
PLW2 9.89999962 W  
PLW12 0.15564001 W  
PLW13 0.07837200 W

F2 - Processing parameters  
SI 131072  
SF 176.1056620 MHz  
WDW EM  
SSB 0  
LB 1.00 Hz  
GB 0  
PC 1.40

<sup>13</sup>C-NMR (R,R,S)-36f

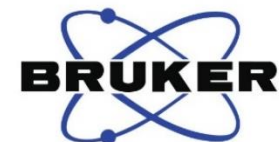

Current Data Parameters  
 NAME Sep01-2021  
 EXPNO 130  
 PROCNO 1

F2 - Acquisition Parameters  
 Date\_ 20210902  
 Time 3.18  
 INSTRUM spect  
 PROBHD 5 mm PABBO BB-  
 PULPROG zg30  
 TD 32768  
 SOLVENT CDCl3  
 NS 32  
 DS 0  
 SWH 10330.578 Hz  
 FIDRES 0.315264 Hz  
 AQ 1.5859712 sec  
 RG 575  
 DW 48.400 usec  
 DE 10.00 usec  
 TE 296.0 K  
 D1 2.00000000 sec  
 TDC 1

===== CHANNEL f1 =====  
 NUC1 1H  
 P1 11.23 usec  
 PL1 1.00 dB  
 PL1W 19.75309753 W  
 SFO1 500.1560886 MHz

F2 - Processing parameters  
 SI 16384  
 SF 500.1530163 MHz  
 WDW EM  
 SSB 0  
 LB 0.30 Hz  
 GB 0  
 PC 1.00

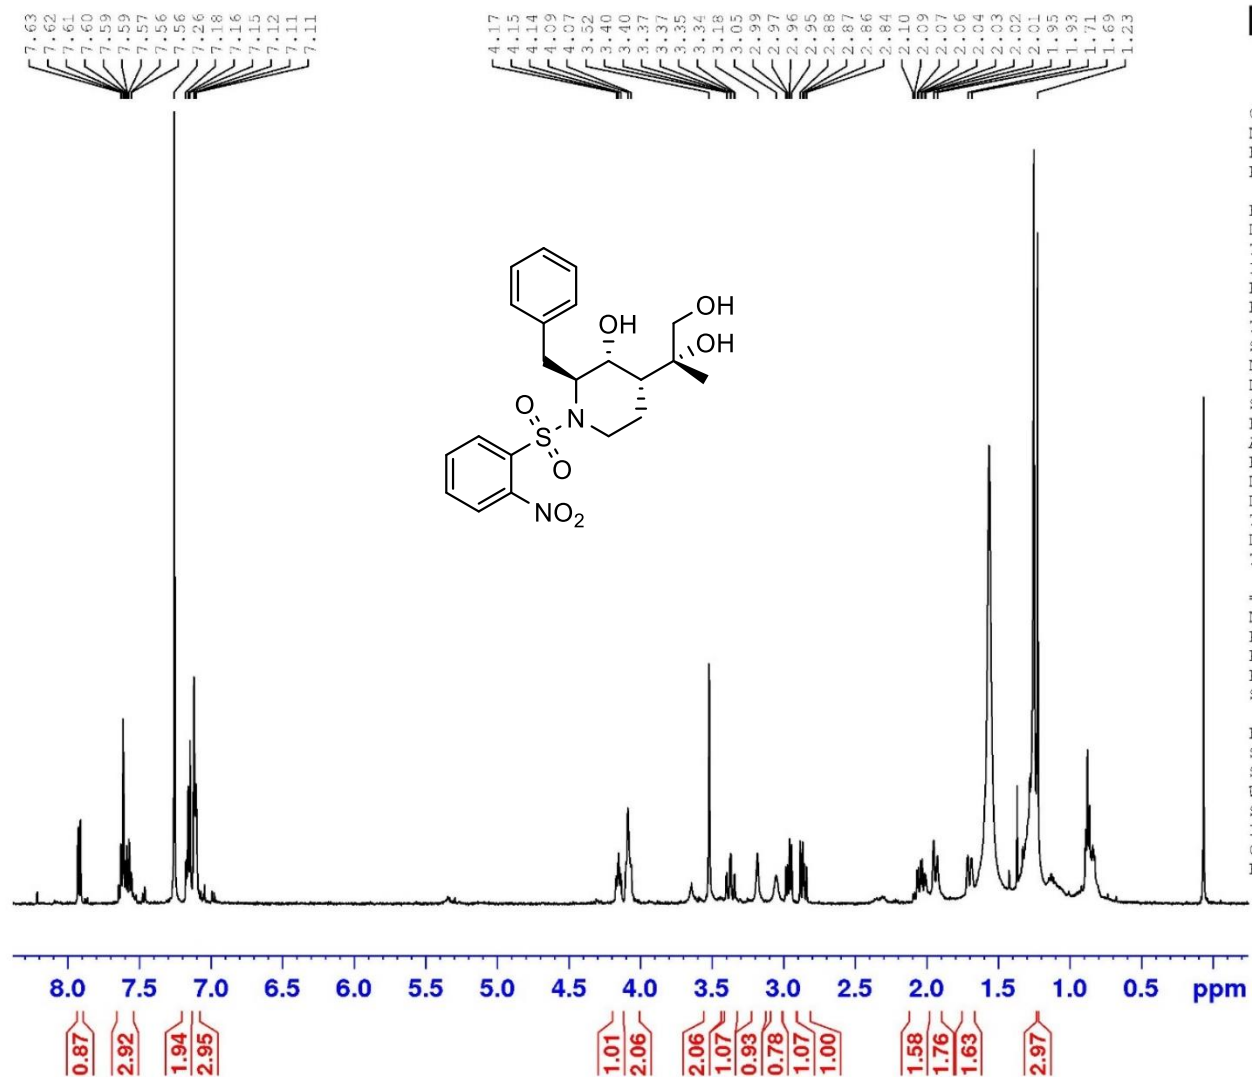

<sup>1</sup>H-NMR (R,R,R)-36f



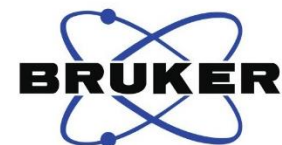

Current Data Parameters  
 NAME Oct13-2020  
 EXPNO 50  
 PROCNO 1

F2 - Acquisition Parameters  
 Date\_ 20201013  
 Time 12.38  
 INSTRUM spect  
 PROBHD 5 mm PABBO BB-  
 PULPROG zg30  
 TD 32768  
 SOLVENT DMSO  
 NS 32  
 DS 0  
 SWH 10330.578 Hz  
 FIDRES 0.315264 Hz  
 AQ 1.5859712 sec  
 RG 322  
 DW 48.400 usec  
 DE 10.00 usec  
 TE 296.0 K  
 D1 2.00000000 sec  
 TDC 1

===== CHANNEL f1 =====  
 NUC1 1H  
 P1 11.23 usec  
 PL1 1.00 dB  
 PL1W 19.75309753 W  
 SFO1 500.1560886 MHz

F2 - Processing parameters  
 SI 16384  
 SF 500.1530073 MHz  
 WDW EM  
 SSB 0  
 LB 0.30 Hz  
 GB 0  
 PC 1.00

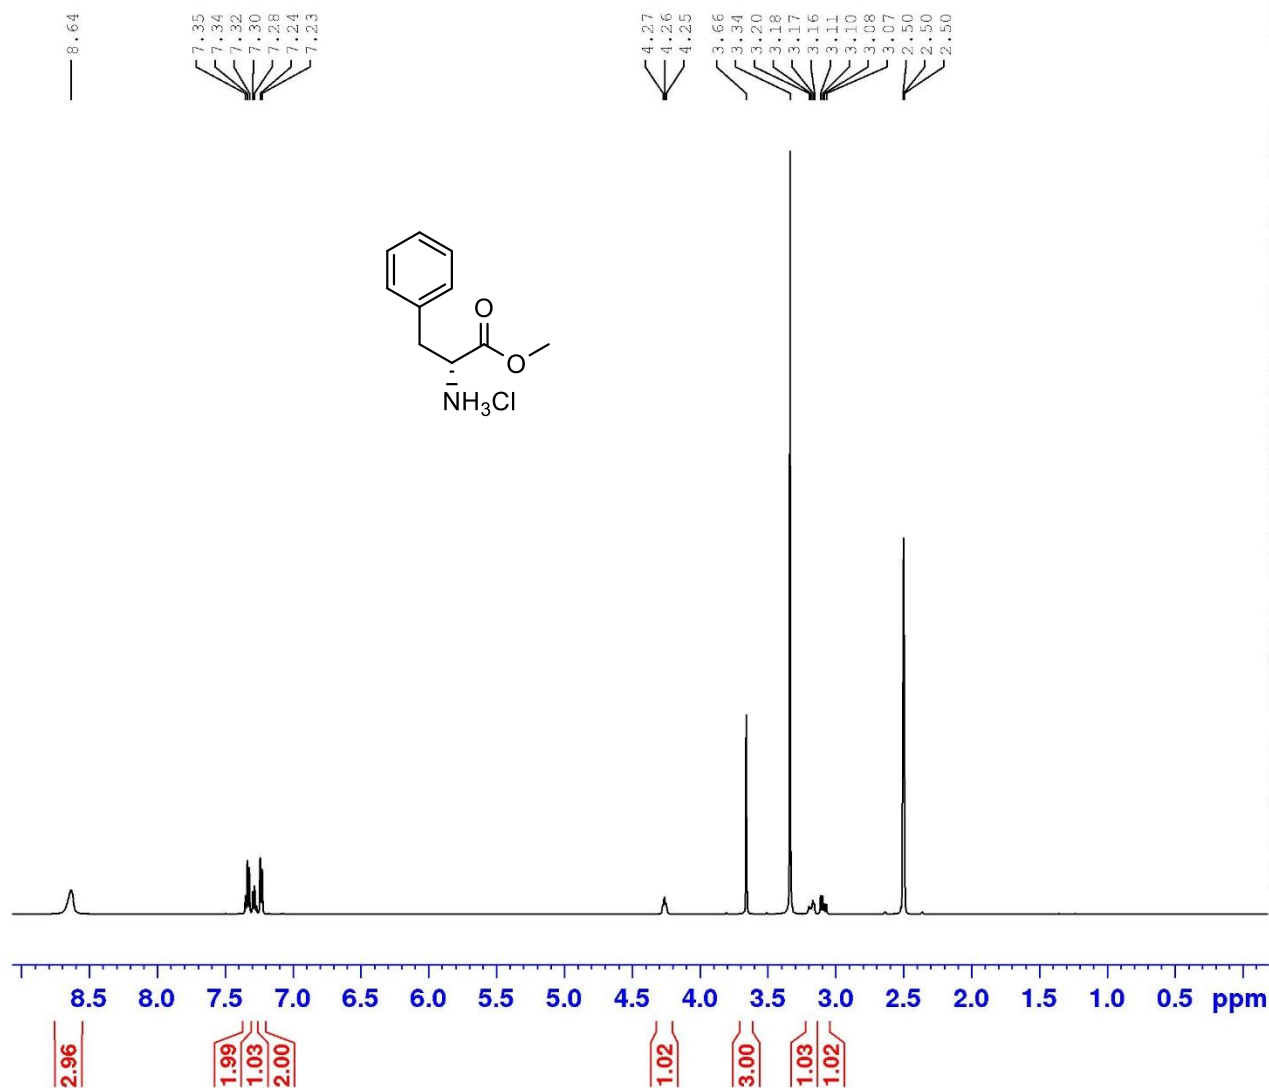

<sup>1</sup>H-NMR 25g

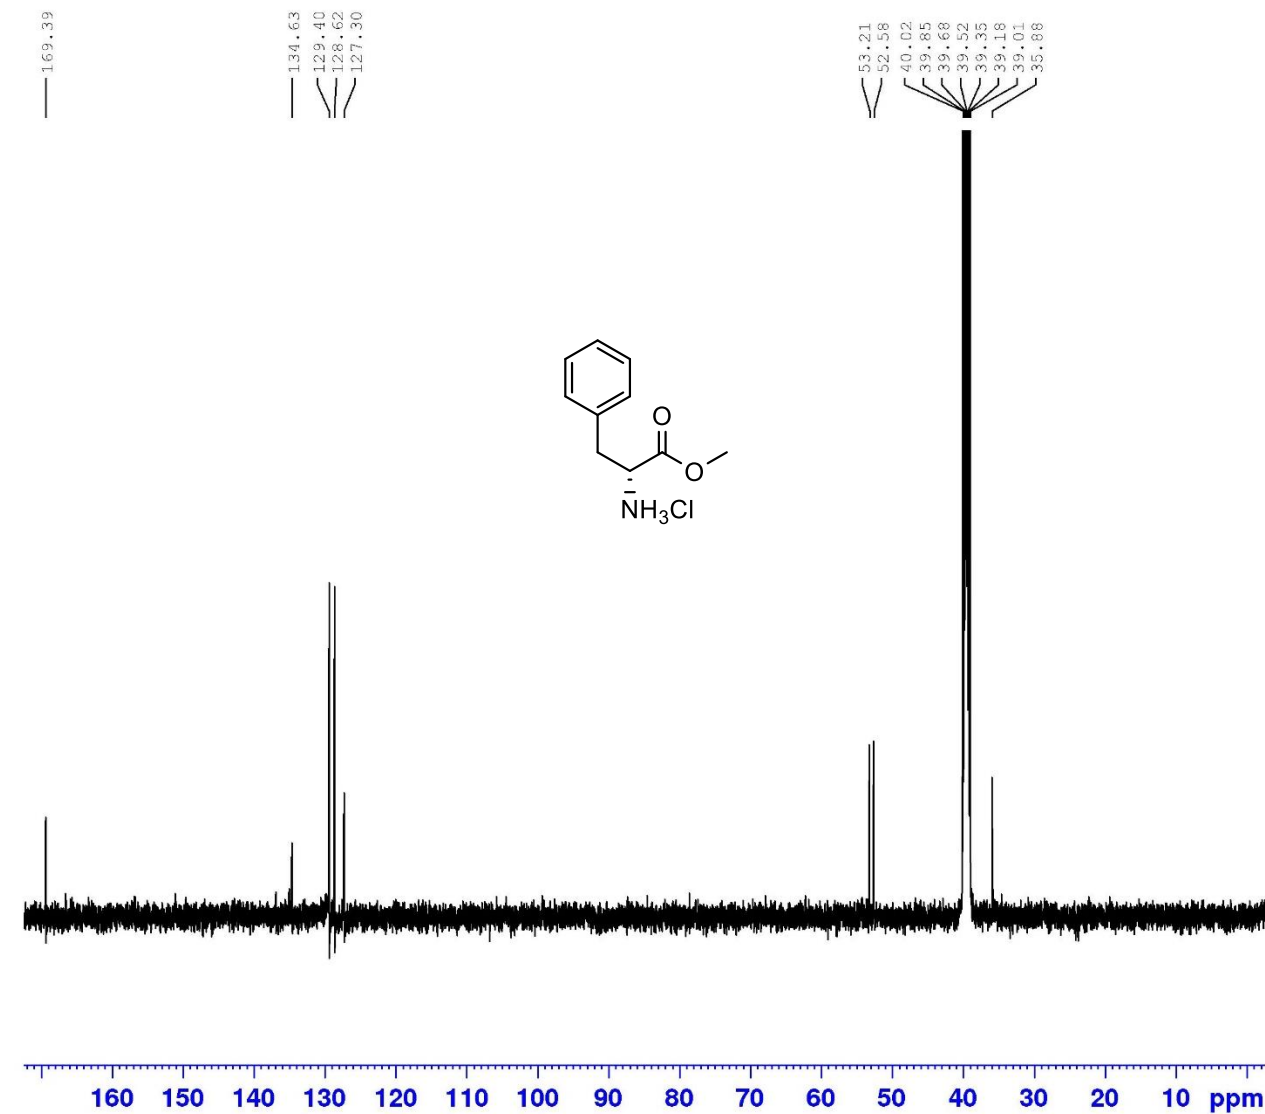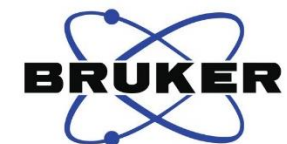

Current Data Parameters  
 NAME Oct13-2020  
 EXPNO 51  
 PROCNO 1

F2 - Acquisition Parameters  
 Date\_ 20201013  
 Time 13.32  
 INSTRUM spect  
 PROBHD 5 mm PABBO BB-  
 PULPROG zgpg30  
 TD 65536  
 SOLVENT DMSO  
 NS 1024  
 DS 4  
 SWH 32894.738 Hz  
 FIDRES 0.501934 Hz  
 AQ 0.9961472 sec  
 RG 2580  
 DW 15.200 usec  
 DE 10.00 usec  
 TE 296.0 K  
 D1 2.00000000 sec  
 D11 0.03000000 sec  
 TD0 1

===== CHANNEL f1 =====  
 NUC1 13C  
 P1 10.20 usec  
 PL1 1.50 dB  
 PL1W 51.74793243 W  
 SFO1 125.7761482 MHz

===== CHANNEL f2 =====  
 CPDPRG[2] waltz16  
 NUC2 1H  
 PCPD2 100.00 usec  
 PL2 1.00 dB  
 PL12 19.99 dB  
 PL13 21.00 dB  
 PL2W 19.75309753 W  
 PL12W 0.24925002 W  
 PL13W 0.19753097 W  
 SFO2 500.1550006 MHz

F2 - Processing parameters  
 SI 32768  
 SF 125.7636319 MHz  
 WDW EM  
 SSB 0  
 LB 1.00 Hz  
 GB 0  
 PC 1.40

<sup>13</sup>C-NMR 25g

S253

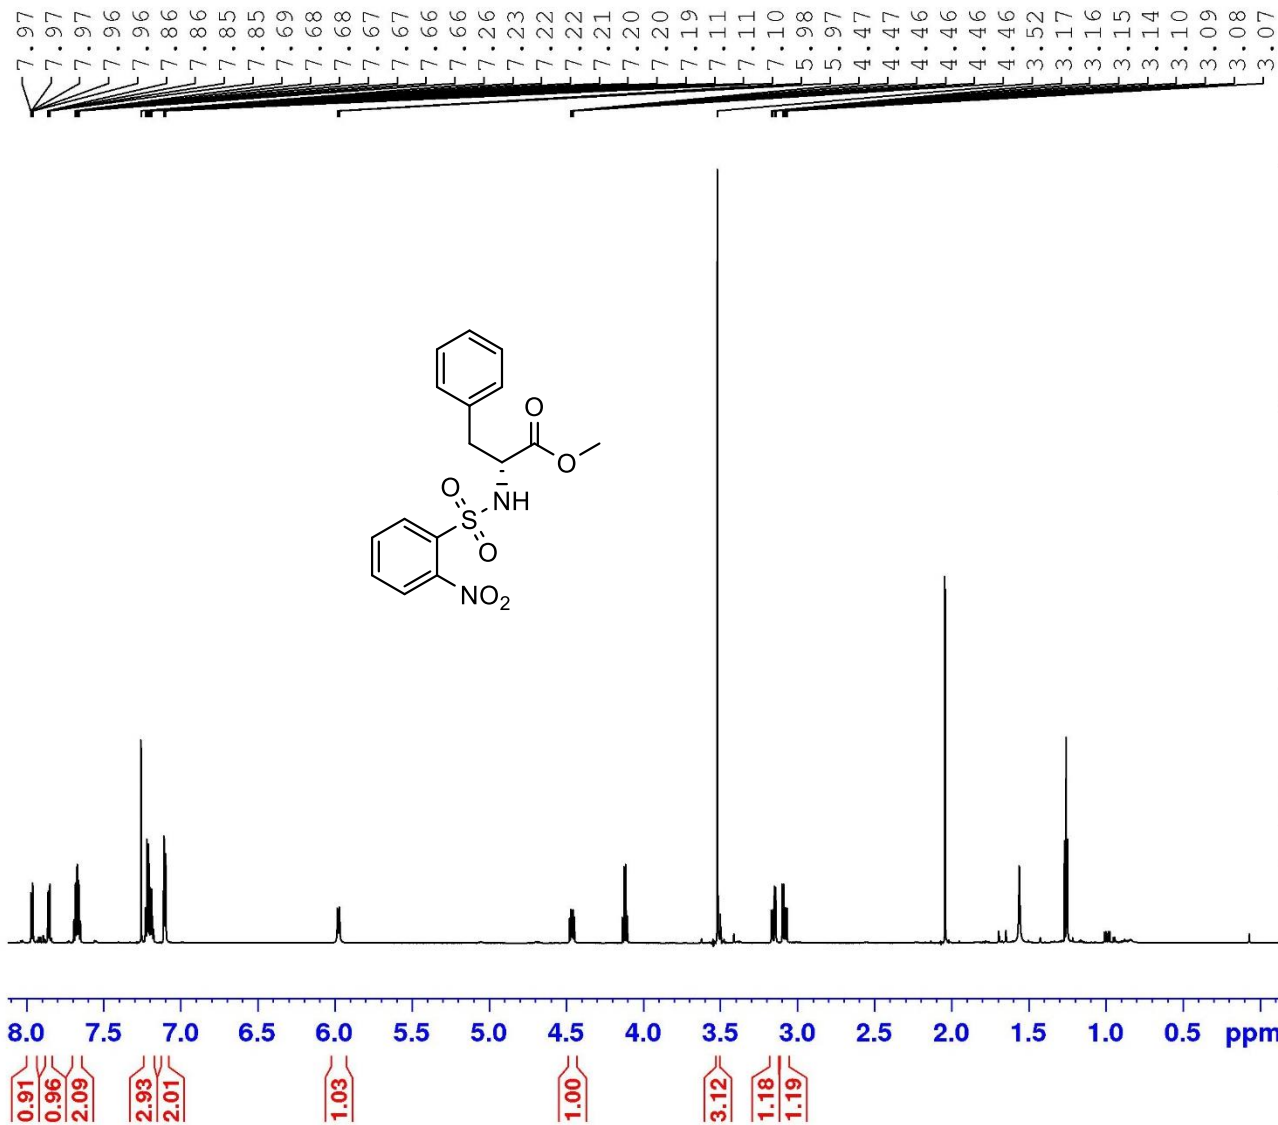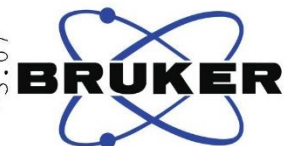

Current Data Parameters  
 NAME Nov17-2020  
 EXPNO 50  
 PROCNO 1

F2 - Acquisition Parameters  
 Date\_ 20201117  
 Time 13.51  
 INSTRUM spect  
 PROBHD 5 mm CPQCI 1H-  
 PULPROG zg  
 TD 65536  
 SOLVENT CDCl3  
 NS 16  
 DS 2  
 SWH 10504.202 Hz  
 FIDRES 0.160281 Hz  
 AQ 3.1195135 sec  
 RG 27.53  
 DW 47.600 usec  
 DE 20.00 usec  
 TE 298.0 K  
 D1 2.00000000 sec  
 TD0 1

===== CHANNEL f1 =====  
 SFO1 700.3632917 MHz  
 NUC1 1H  
 P1 8.15 usec  
 PLW1 9.89999962 W

F2 - Processing parameters  
 SI 65536  
 SF 700.3600179 MHz  
 WDW EM  
 SSB 0  
 LB 0.30 Hz  
 GB 0  
 PC 1.00

<sup>1</sup>H-NMR 26g

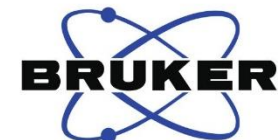

Current Data Parameters  
 NAME Nov17-2020  
 EXPNO 51  
 PROCNO 1

F2 - Acquisition Parameters  
 Date\_ 20201117  
 Time 14.16  
 INSTRUM spect  
 PROBHD 5 mm CPQCI 1H-  
 PULPROG zgpg30  
 TD 65356  
 SOLVENT CDC13  
 NS 512  
 DS 4  
 SWH 40760.871 Hz  
 FIDRES 0.623675 Hz  
 AQ 0.8017003 sec  
 RG 182.53  
 DW 12.267 usec  
 DE 18.00 usec  
 TE 298.0 K  
 D1 2.00000000 sec  
 D11 0.03000000 sec  
 TD0 1

===== CHANNEL f1 =====  
 SFO1 176.1232717 MHz  
 NUC1 13C  
 P1 12.00 usec  
 PLW1 105.00000000 W

===== CHANNEL f2 =====  
 SFO2 700.3628014 MHz  
 NUC2 1H  
 CPDPRG[2] waltz16  
 PCPD2 65.00 usec  
 PLW2 9.89999962 W  
 PLW12 0.15564001 W  
 PLW13 0.07837200 W

F2 - Processing parameters  
 SI 131072  
 SF 176.1056620 MHz  
 WDW EM  
 SSB 0  
 LB 1.00 Hz  
 GB 0  
 PC 1.40

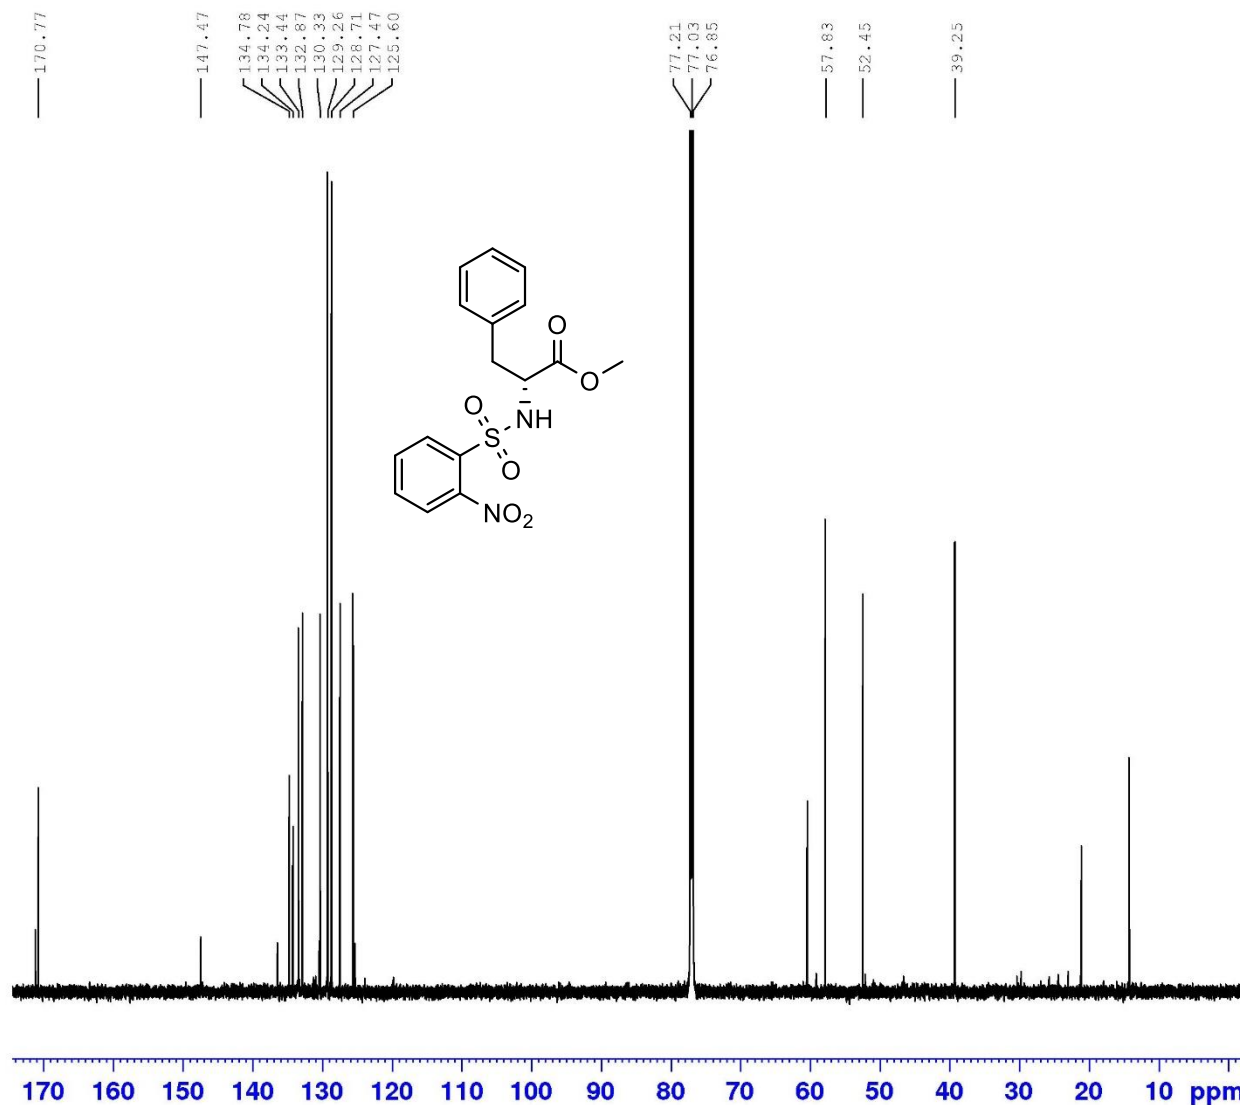

<sup>13</sup>C-NMR 26g

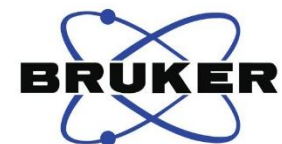

Current Data Parameters  
 NAME Oct22-2020  
 EXPNO 40  
 PROCNO 1

F2 - Acquisition Parameters  
 Date\_ 20201022  
 Time 18.17  
 INSTRUM spect  
 PROBHD 5 mm PABBO BB-  
 PULPROG zg30  
 TD 32768  
 SOLVENT CDC13  
 NS 32  
 DS 0  
 SWH 10330.578 Hz  
 FIDRES 0.315264 Hz  
 AQ 1.5859712 sec  
 RG 228  
 DW 48.400 usec  
 DE 10.00 usec  
 TE 296.0 K  
 D1 2.00000000 sec  
 TD0 1

===== CHANNEL f1 =====  
 NUC1 1H  
 P1 11.23 usec  
 PL1 1.00 dB  
 PL1W 19.75309753 W  
 SFO1 500.1560886 MHz

F2 - Processing parameters  
 SI 16384  
 SF 500.1530190 MHz  
 WDW EM  
 SSB 0  
 LB 0.30 Hz  
 GB 0  
 PC 1.00

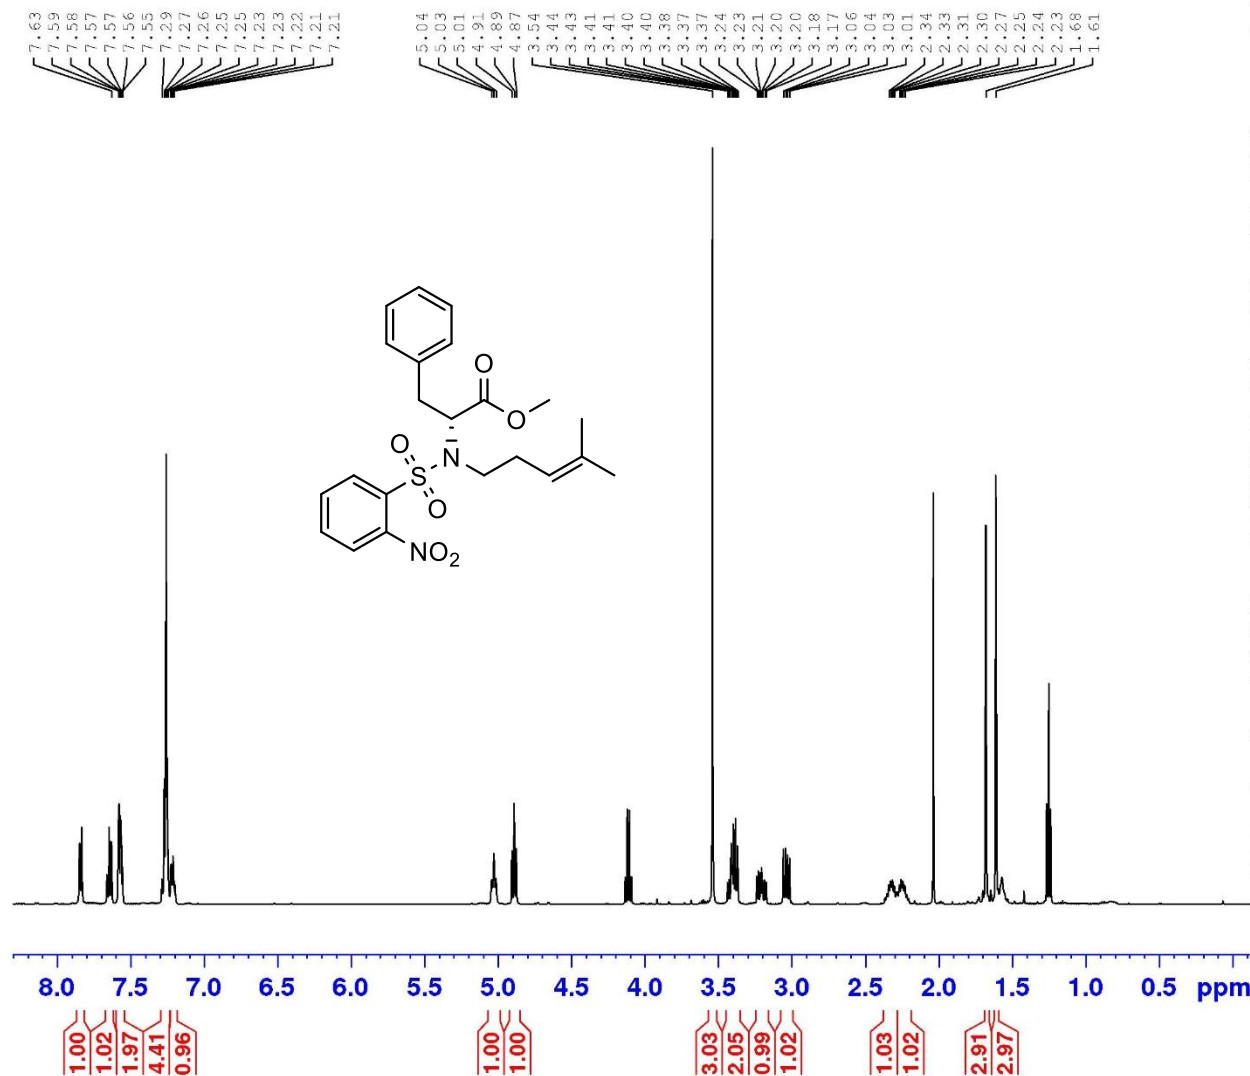

<sup>1</sup>H-NMR 27g

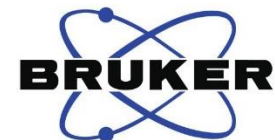

Current Data Parameters  
 NAME Oct22-2020  
 EXPNO 41  
 PROCNO 1

F2 - Acquisition Parameters  
 Date\_ 20201022  
 Time 19.11  
 INSTRUM spect  
 PROBHD 5 mm PABBO BB-  
 PULPROG zgpg30  
 TD 65536  
 SOLVENT CDCl3  
 NS 1024  
 DS 4  
 SWH 32894.738 Hz  
 FIDRES 0.501934 Hz  
 AQ 0.9961472 sec  
 RG 2580  
 DW 15.200 usec  
 DE 10.00 usec  
 TE 296.0 K  
 D1 2.00000000 sec  
 D11 0.03000000 sec  
 TDC 1

===== CHANNEL f1 =====  
 NUC1 13C  
 P1 10.20 usec  
 PL1 1.50 dB  
 PL1W 51.74793243 W  
 SFO1 125.7761482 MHz

===== CHANNEL f2 =====  
 CPDPRG[2] waltz16  
 NUC2 1H  
 PCPD2 100.00 usec  
 PL2 1.00 dB  
 PL12 19.99 dB  
 PL13 21.00 dB  
 PL2W 19.75309753 W  
 PL12W 0.24925002 W  
 PL13W 0.19753097 W  
 SFO2 500.1550006 MHz

F2 - Processing parameters  
 SI 32768  
 SF 125.7635720 MHz  
 WDW EM  
 SSB 0  
 LB 1.00 Hz  
 GB 0  
 PC 1.40

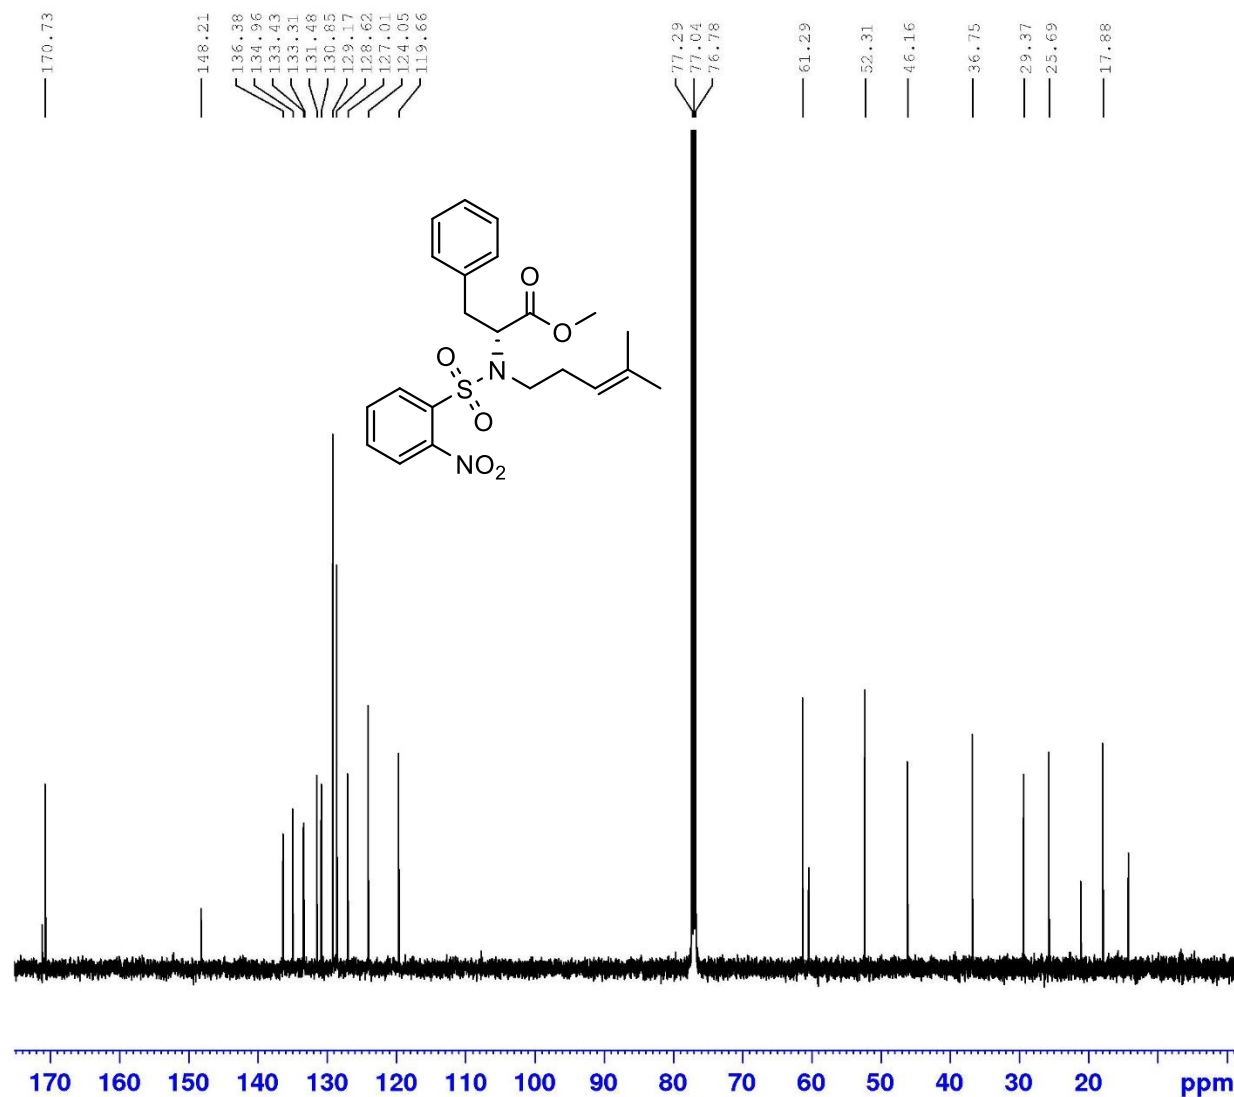

<sup>13</sup>C-NMR 27g

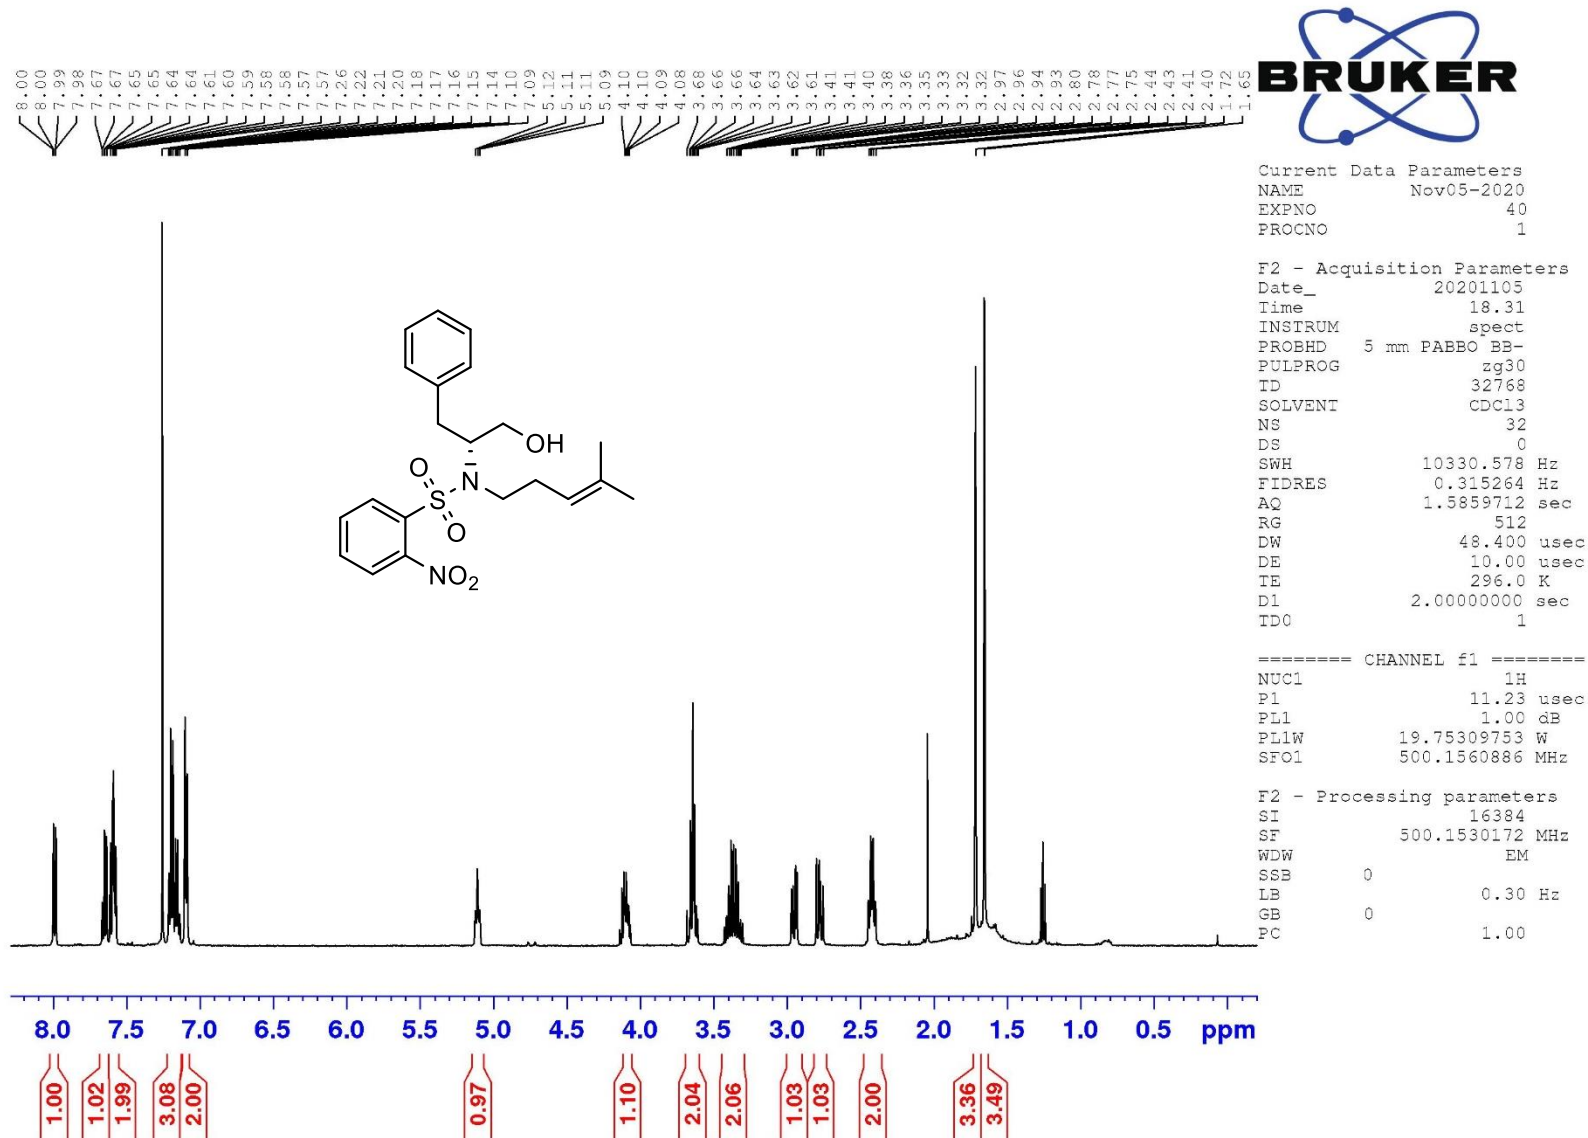

<sup>1</sup>H-NMR 28g

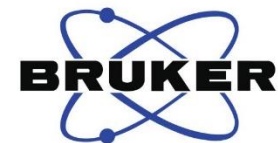

Current Data Parameters  
 NAME Nov05-2020  
 EXPNO 41  
 PROCNO 1

F2 - Acquisition Parameters  
 Date\_ 20201105  
 Time 19.25  
 INSTRUM spect  
 PROBHD 5 mm PABBO BB-  
 PULPROG zgpg30  
 TD 65536  
 SOLVENT CDCl3  
 NS 1024  
 DS 4  
 SWH 32894.738 Hz  
 FIDRES 0.501934 Hz  
 AQ 0.9961472 sec  
 RG 2580  
 DW 15.200 usec  
 DE 10.00 usec  
 TE 296.0 K  
 D1 2.00000000 sec  
 D11 0.03000000 sec  
 TDO 1

===== CHANNEL f1 =====  
 NUC1 13C  
 P1 10.20 usec  
 PL1 1.50 dB  
 PL1W 51.74793243 W  
 SFO1 125.7761482 MHz

===== CHANNEL f2 =====  
 CPDPRG[2] waltz16  
 NUC2 1H  
 PCPD2 100.00 usec  
 PL2 1.00 dB  
 PL12 19.99 dB  
 PL13 21.00 dB  
 PL2W 19.75309753 W  
 PL12W 0.24925002 W  
 PL13W 0.19753097 W  
 SFO2 500.1550006 MHz

F2 - Processing parameters  
 SI 32768  
 SF 125.7635720 MHz  
 WDW EM  
 SSB 0  
 LB 1.00 Hz  
 GB 0  
 PC 1.40

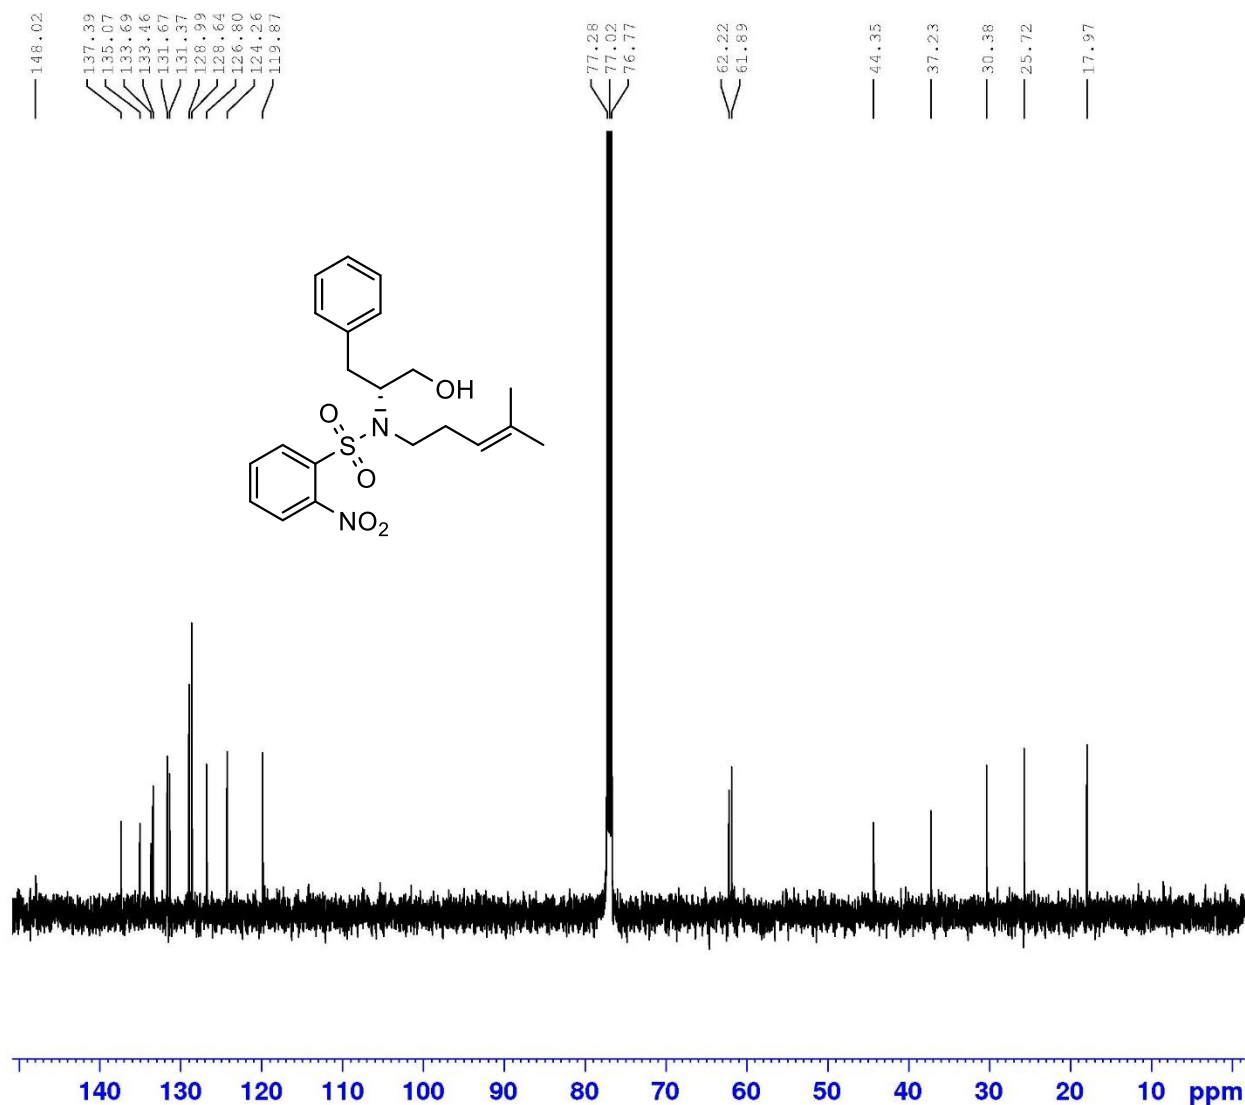

<sup>13</sup>C-NMR 28g

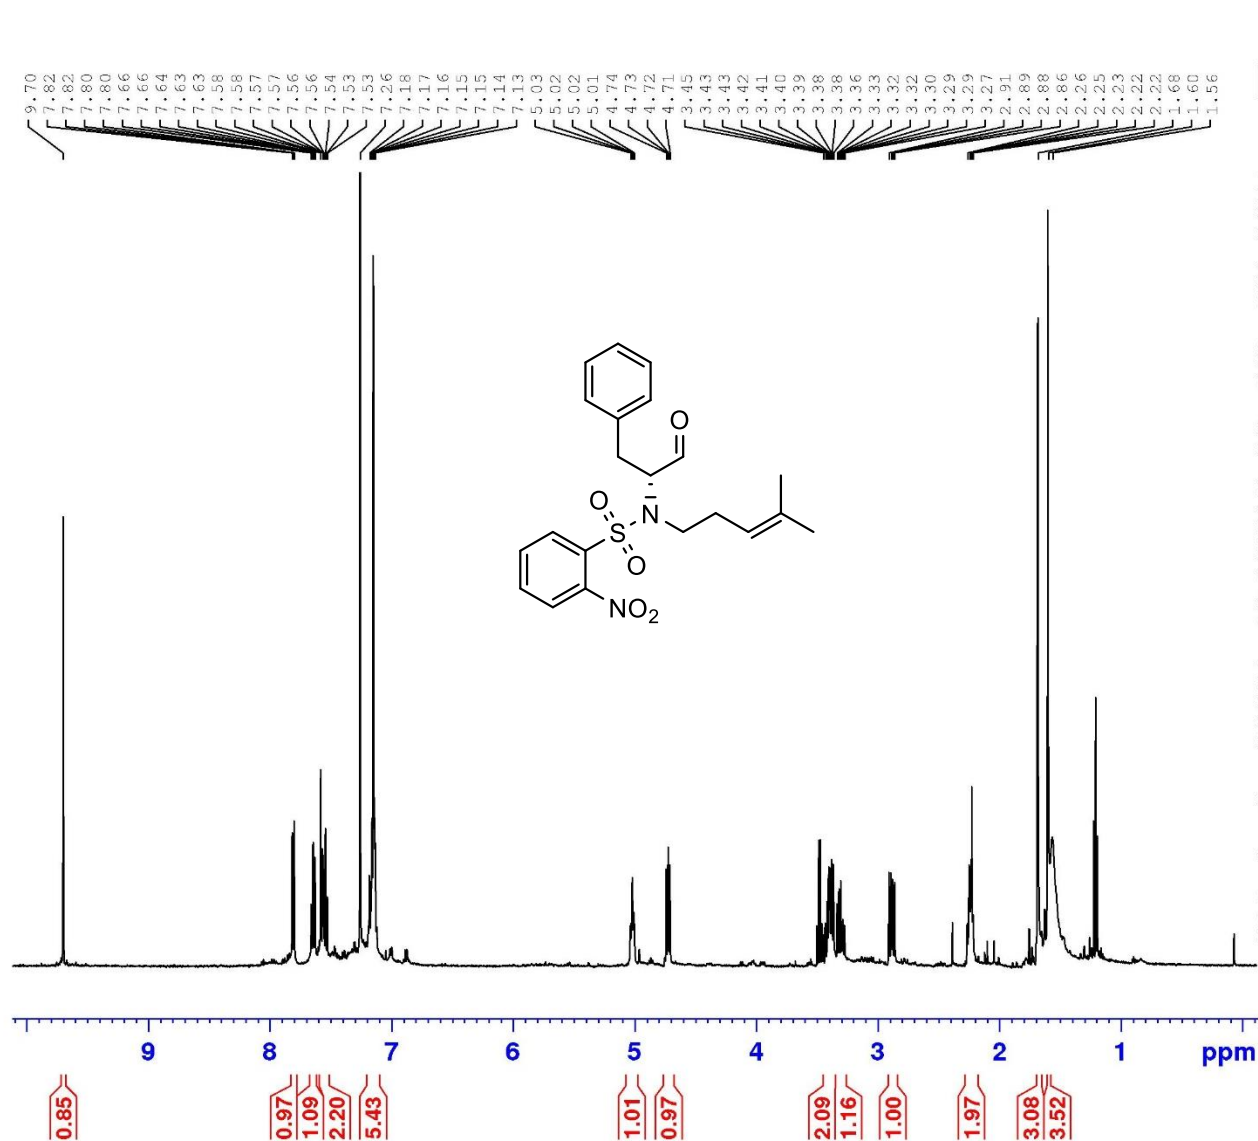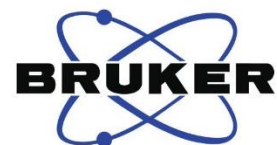

Current Data Parameters  
 NAME Nov09-2020  
 EXPNO 120  
 PROCNO 1

F2 - Acquisition Parameters  
 Date\_ 20201109  
 Time 15.33  
 INSTRUM spect  
 PROBHD 5 mm PABBO BB-  
 PULPROG zg30  
 TD 32768  
 SOLVENT CDCl<sub>3</sub>  
 NS 32  
 DS 0  
 SWH 10330.578 Hz  
 FIDRES 0.315264 Hz  
 AQ 1.5859712 sec  
 RG 512  
 DW 48.400 usec  
 DE 10.00 usec  
 TE 296.0 K  
 D1 2.00000000 sec  
 TD0 1

===== CHANNEL f1 =====  
 NUC1 1H  
 P1 11.23 usec  
 PL1 1.00 dB  
 PL1W 19.75309753 W  
 SFO1 500.1560886 MHz

F2 - Processing parameters  
 SI 16384  
 SF 500.1530160 MHz  
 WDW EM  
 SSB 0  
 LB 0.30 Hz  
 GB 0  
 PC 1.00

<sup>1</sup>H-NMR 29g

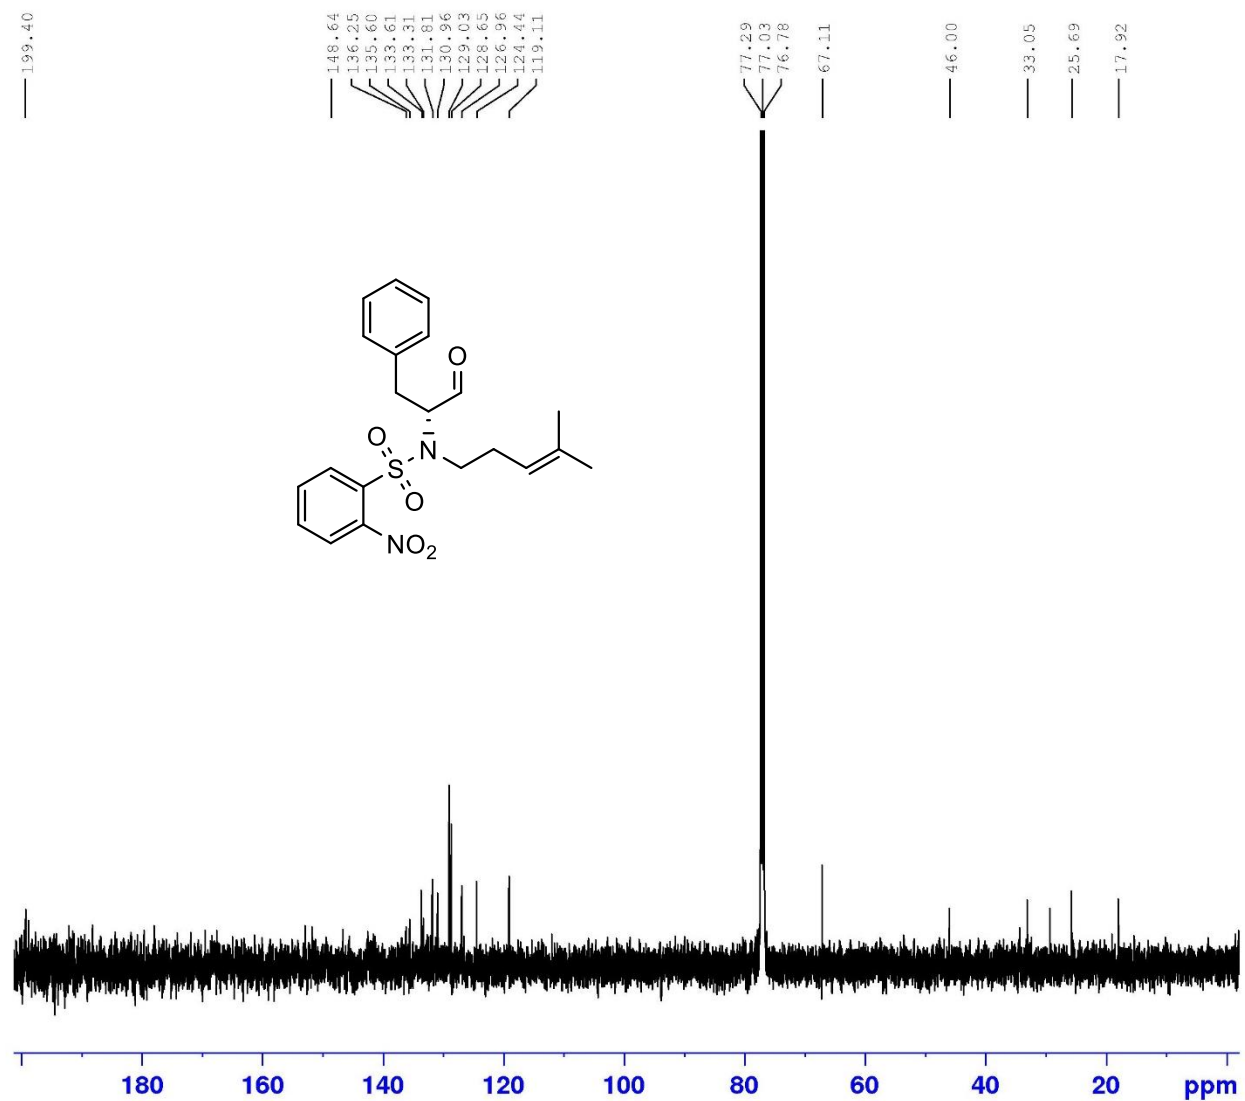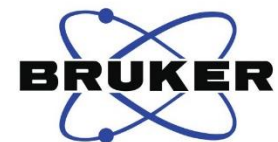

Current Data Parameters  
 NAME Nov09-2020  
 EXPNO 121  
 PROCNO 1

F2 - Acquisition Parameters  
 Date\_ 20201109  
 Time 16.28  
 INSTRUM spect  
 PROBHD 5 mm PABBO BB-  
 PULPROG zgpg30  
 TD 65536  
 SOLVENT CDC13  
 NS 1024  
 DS 4  
 SWH 32894.738 Hz  
 FIDRES 0.501934 Hz  
 AQ 0.9961472 sec  
 RG 2580  
 DW 15.200 usec  
 DE 10.00 usec  
 TE 296.0 K  
 D1 2.00000000 sec  
 D11 0.03000000 sec  
 TD0 1

===== CHANNEL f1 =====  
 NUC1 13C  
 P1 10.20 usec  
 PL1 1.50 dB  
 PL1W 51.74793243 W  
 SFO1 125.7761482 MHz

===== CHANNEL f2 =====  
 CPDPRG[2] waltz16  
 NUC2 1H  
 PCPD2 100.00 usec  
 PL2 1.00 dB  
 PL12 19.99 dB  
 PL13 21.00 dB  
 PL2W 19.75309753 W  
 PL12W 0.24925002 W  
 PL13W 0.19753097 W  
 SFO2 500.1550006 MHz

F2 - Processing parameters  
 SI 32768  
 SF 125.7635720 MHz  
 WDW EM  
 SSB 0  
 LB 1.00 Hz  
 GB 0  
 PC 1.40
